# Supplementary material for: Gut microbiota and venous thromboembolism: a two-sample Mendelian randomization study Gut microbiota and venous thromboembolism
Source: Research Square preprint supplement (doi:10.21203/rs.3.rs-3834627/v1), 2024-01-08
Supplement: Supplementary file 1 [file 047c9b3535dbb44b83dffb2a.xlsx]

## Sheet: Sheet1
Table S5 Details of the genetic variants with potential pleiotropy among instrumental variables used for gut microbiota.
Outcome	Gut microbiota	SNP	hg19_coordinates	hg38_coordinates	Trait	Study	Database/PMID	Ancestry	Year	beta	se	p-value	Direction	n	n_cases	n_controls	Dataset
VTE	family.Porphyromonadaceae.id.943	rs35233670	chr17:63750903	chr17:65754785	Hair or balding pattern: pattern 2	Neale B	UKBB	European	2017	-0.008232	0.001526	6.883e-08	-	154988	35563	119425	Neale-B_UKBB_EUR_2017
			chr17:63750903	chr17:65754785	Hair or balding pattern: pattern 4	Neale B	UKBB	European	2017	0.008488	0.001404	1.487e-09	+	154988	28389	126599	Neale-B_UKBB_EUR_2017
		rs35961441	chr1:240929774	chr1:240766474	Treatment with arcoxia 90mg tablet	Neale B	UKBB	European	2017	0.0003624	7.516e-05	1.425e-06	+	337159	98	337061	Neale-B_UKBB_EUR_2017
		rs6953849	chr7:69251692	chr7:69786706	Hair or balding pattern: pattern 4	Neale B	UKBB	European	2017	-0.009909	0.001965	4.62e-07	-	154988	28389	126599	Neale-B_UKBB_EUR_2017
	phylum.Cyanobacteria.id.1500	rs2585223	chr15:100880888	chr15:100340683	Height	Neale B	UKBB	European	2017	-0.01455	0.002459	3.283e-09	-	336474	0	336474	Neale-B_UKBB_EUR_2017
		rs584122	chr6:48288456	chr6:48320720	mDC:%32+; mDC subset (CD32+)	Roederer M	25772697	European	2015	0.1284	0.02669	1.51e-06	+	435	0	435	Roederer-M_Immune-System_EUR_2015
		rs7148504	chr14:100168298	chr14:99701961	Coronary artery disease	van der Harst P	29212778	Mixed	2018	-0.04132	0.007407	2.4e-08	-	296525	34541	261984	van-der-Harst-P_CAD-UKBB_Mixed_2018
			chr14:100168298	chr14:99701961	Coronary artery disease	van der Harst P	29212778	Mixed	2018	-0.0379	0.006	2.787e-10	-	547261	122733	424528	van-der-Harst-P_CAD_Mixed_2018
DVT	family.Defluviitaleaceae.id.1924	rs1582238	chr1:118723685	chr1:118181062	Hair or balding pattern: pattern 4	Neale B	UKBB	European	2017	-0.007855	0.001487	1.29e-07	-	154988	28389	126599	Neale-B_UKBB_EUR_2017
		rs9725395	chr1:85205632	chr1:84739949	Senility	Neale B	UKBB	European	2017	0.0003006	6.621e-05	5.635e-06	+	337199	72	337127	Neale-B_UKBB_EUR_2017
	family.Oxalobacteraceae.id.2966	rs4428215	chr3:171947435	chr3:172229645	Height	GIANT	25282103	European	2014	-0.022	0.0035	3e-10	-	253039	0	253039	GIANT_Height_EUR_2014
			chr3:171947435	chr3:172229645	Height	Neale B	UKBB	European	2017	-0.0159	0.00207	1.54e-14	-	336474	0	336474	Neale-B_UKBB_EUR_2017
		rs6000536	chr22:37421469	chr22:37025428	Hemoglobin concentration	Astle W	27863252	European	2016	0.03425	0.004465	1.702e-14	+	173480	0	173480	Astle-W_Blood-Cell-Traits_EUR_2016
			chr22:37421469	chr22:37025428	Mean corpuscular hemoglobin	Astle W	27863252	European	2016	0.0673	0.004451	1.162e-51	+	173480	0	173480	Astle-W_Blood-Cell-Traits_EUR_2016
			chr22:37421469	chr22:37025428	Mean corpuscular hemoglobin concentration	Astle W	27863252	European	2016	0.04541	0.004358	2.046e-25	+	173480	0	173480	Astle-W_Blood-Cell-Traits_EUR_2016
			chr22:37421469	chr22:37025428	Mean corpuscular volume	Astle W	27863252	European	2016	0.05366	0.00444	1.265e-33	+	173480	0	173480	Astle-W_Blood-Cell-Traits_EUR_2016
			chr22:37421469	chr22:37025428	Red cell distribution width	Astle W	27863252	European	2016	-0.05028	0.004455	1.531e-29	-	173480	0	173480	Astle-W_Blood-Cell-Traits_EUR_2016
			chr22:37421469	chr22:37025428	Mineral and other dietary supplements: iron	Neale B	UKBB	European	2017	-0.002314	0.0005146	6.865e-06	-	336314	9754	326560	Neale-B_UKBB_EUR_2017
	family.Ruminococcaceae.id.2050	rs1158100	chr8:4555684	chr8:4698162	Age at menarche	Neale B	UKBB	European	2017	0.01145	0.002564	7.954e-06	+	176008	0	176008	Neale-B_UKBB_EUR_2017
		rs2113833	chr2:218216801	chr2:217352078	Self-reported thalassaemia	Neale B	UKBB	European	2017	0.0003042	6.666e-05	5.027e-06	+	337159	41	337118	Neale-B_UKBB_EUR_2017
		rs55793120	chr12:47384118	chr12:46990335	Arm fat-free mass right	Neale B	UKBB	European	2017	0.01557	0.003308	2.534e-06	+	331221	0	331221	Neale-B_UKBB_EUR_2017
			chr12:47384118	chr12:46990335	Arm predicted mass right	Neale B	UKBB	European	2017	0.01511	0.003297	4.57e-06	+	331216	0	331216	Neale-B_UKBB_EUR_2017
			chr12:47384118	chr12:46990335	Basal metabolic rate	Neale B	UKBB	European	2017	0.01813	0.00352	2.606e-07	+	331307	0	331307	Neale-B_UKBB_EUR_2017
			chr12:47384118	chr12:46990335	Height	Neale B	UKBB	European	2017	0.02159	0.003771	1.033e-08	+	336474	0	336474	Neale-B_UKBB_EUR_2017
			chr12:47384118	chr12:46990335	Leg fat-free mass left	Neale B	UKBB	European	2017	0.0189	0.003496	6.479e-08	+	331258	0	331258	Neale-B_UKBB_EUR_2017
			chr12:47384118	chr12:46990335	Leg fat-free mass right	Neale B	UKBB	European	2017	0.01878	0.003495	7.747e-08	+	331285	0	331285	Neale-B_UKBB_EUR_2017
			chr12:47384118	chr12:46990335	Leg predicted mass left	Neale B	UKBB	European	2017	0.01888	0.003472	5.384e-08	+	331253	0	331253	Neale-B_UKBB_EUR_2017
			chr12:47384118	chr12:46990335	Leg predicted mass right	Neale B	UKBB	European	2017	0.01853	0.003472	9.396e-08	+	331285	0	331285	Neale-B_UKBB_EUR_2017
			chr12:47384118	chr12:46990335	Trunk fat-free mass	Neale B	UKBB	European	2017	0.01611	0.003345	1.466e-06	+	331030	0	331030	Neale-B_UKBB_EUR_2017
			chr12:47384118	chr12:46990335	Trunk predicted mass	Neale B	UKBB	European	2017	0.0156	0.003334	2.857e-06	+	330995	0	330995	Neale-B_UKBB_EUR_2017
			chr12:47384118	chr12:46990335	Whole body fat-free mass	Neale B	UKBB	European	2017	0.01758	0.003357	1.633e-07	+	331291	0	331291	Neale-B_UKBB_EUR_2017
			chr12:47384118	chr12:46990335	Whole body water mass	Neale B	UKBB	European	2017	0.01752	0.003362	1.877e-07	+	331315	0	331315	Neale-B_UKBB_EUR_2017
	genus..Eubacteriumrectalegroup.id.14374	rs10892089	chr11:98523638	chr11:98652908	Cause of death: lobar pneumonia, unspecified	Neale B	UKBB	European	2017	0.003649	0.0007614	1.678e-06	+	7637	10	7627	Neale-B_UKBB_EUR_2017
		rs3980709	chr1:170900221	chr1:170931080	Hand grip strength left	Neale B	UKBB	European	2017	-0.01215	0.002327	1.781e-07	-	335821	0	335821	Neale-B_UKBB_EUR_2017
			chr1:170900221	chr1:170931080	Hand grip strength right	Neale B	UKBB	European	2017	-0.0103	0.002331	9.924e-06	-	335842	0	335842	Neale-B_UKBB_EUR_2017
			chr1:170900221	chr1:170931080	Impedance of arm left	Neale B	UKBB	European	2017	0.01419	0.002279	4.735e-10	+	331292	0	331292	Neale-B_UKBB_EUR_2017
			chr1:170900221	chr1:170931080	Impedance of arm right	Neale B	UKBB	European	2017	0.01421	0.002269	3.779e-10	+	331279	0	331279	Neale-B_UKBB_EUR_2017
			chr1:170900221	chr1:170931080	Impedance of leg right	Neale B	UKBB	European	2017	0.01386	0.002919	2.073e-06	+	331301	0	331301	Neale-B_UKBB_EUR_2017
			chr1:170900221	chr1:170931080	Impedance of whole body	Neale B	UKBB	European	2017	0.01447	0.00246	4.06e-09	+	331284	0	331284	Neale-B_UKBB_EUR_2017
		rs62547233	chr9:92013419	chr9:89398504	High light scatter percentage of red cells	Astle W	27863252	European	2016	-0.02431	0.003984	1.048e-09	-	173480	0	173480	Astle-W_Blood-Cell-Traits_EUR_2016
			chr9:92013419	chr9:89398504	High light scatter reticulocyte count	Astle W	27863252	European	2016	-0.02371	0.003984	2.644e-09	-	173480	0	173480	Astle-W_Blood-Cell-Traits_EUR_2016
			chr9:92013419	chr9:89398504	Reticulocyte count	Astle W	27863252	European	2016	-0.02322	0.003991	5.917e-09	-	173480	0	173480	Astle-W_Blood-Cell-Traits_EUR_2016
			chr9:92013419	chr9:89398504	Reticulocyte fraction of red cells	Astle W	27863252	European	2016	-0.02364	0.003988	3.088e-09	-	173480	0	173480	Astle-W_Blood-Cell-Traits_EUR_2016
	genus.Erysipelatoclostridium.id.11381	rs1434153	chr2:34595533	chr2:34370466	Home area population density: Scotland large urban area	Neale B	UKBB	European	2017	0.002656	0.0005719	3.401e-06	+	333997	18867	315130	Neale-B_UKBB_EUR_2017
		rs17804233	chr5:77815056	chr5:78519233	Platelet count	Astle W	27863252	European	2016	0.02429	0.003671	3.684e-11	+	173480	0	173480	Astle-W_Blood-Cell-Traits_EUR_2016
			chr5:77815056	chr5:78519233	Platelet distribution width	Astle W	27863252	European	2016	-0.02132	0.003619	3.838e-09	-	173480	0	173480	Astle-W_Blood-Cell-Traits_EUR_2016
			chr5:77815056	chr5:78519233	Plateletcrit	Astle W	27863252	European	2016	0.02993	0.003683	4.399e-16	+	173480	0	173480	Astle-W_Blood-Cell-Traits_EUR_2016
		rs4697572	chr4:25446787	chr4:25445165	Impedance of leg left	Neale B	UKBB	European	2017	-0.012	0.002541	2.299e-06	-	331296	0	331296	Neale-B_UKBB_EUR_2017
			chr4:25446787	chr4:25445165	Impedance of leg right	Neale B	UKBB	European	2017	-0.01131	0.002521	7.224e-06	-	331301	0	331301	Neale-B_UKBB_EUR_2017
			chr4:25446787	chr4:25445165	Impedance of whole body	Neale B	UKBB	European	2017	-0.009564	0.002125	6.751e-06	-	331284	0	331284	Neale-B_UKBB_EUR_2017
	genus.LachnospiraceaeUCG001.id.11321	rs12131224	chr1:166199362	chr1:166230125	Home area population density: Scotland large urban area	Neale B	UKBB	European	2017	0.004168	0.0009155	5.307e-06	+	333997	18867	315130	Neale-B_UKBB_EUR_2017
	genus.Slackia.id.825	rs16894137	chr8:96946291	chr8:95934063	Birthlength	EGGC	25281659	European	2014	0.0726	0.0144	4.342e-07	+	22258	0	22258	EGGC_Birthlength_EUR_2014
PE	family.Alcaligenaceae.id.2875	rs147968	chr16:85945839	chr16:85912233	Basophil percentage of granulocytes	Astle W	27863252	European	2016	-0.01763	0.003572	8.056e-07	-	173480	0	173480	Astle-W_Blood-Cell-Traits_EUR_2016
			chr16:85945839	chr16:85912233	Granulocyte count	Astle W	27863252	European	2016	0.0216	0.003663	3.68e-09	+	173480	0	173480	Astle-W_Blood-Cell-Traits_EUR_2016
			chr16:85945839	chr16:85912233	Granulocyte percentage of myeloid white cells	Astle W	27863252	European	2016	0.09305	0.003642	5.21e-144	+	173480	0	173480	Astle-W_Blood-Cell-Traits_EUR_2016
			chr16:85945839	chr16:85912233	Monocyte count	Astle W	27863252	European	2016	-0.08269	0.003642	3.94e-114	-	173480	0	173480	Astle-W_Blood-Cell-Traits_EUR_2016
			chr16:85945839	chr16:85912233	Monocyte percentage of white cells	Astle W	27863252	European	2016	-0.098	0.003631	1.97e-160	-	173480	0	173480	Astle-W_Blood-Cell-Traits_EUR_2016
			chr16:85945839	chr16:85912233	Neutrophil count	Astle W	27863252	European	2016	0.02239	0.003654	8.824e-10	+	173480	0	173480	Astle-W_Blood-Cell-Traits_EUR_2016
			chr16:85945839	chr16:85912233	Neutrophil percentage of white cells	Astle W	27863252	European	2016	0.0391	0.003639	6.327e-27	+	173480	0	173480	Astle-W_Blood-Cell-Traits_EUR_2016
			chr16:85945839	chr16:85912233	Sum basophil neutrophil counts	Astle W	27863252	European	2016	0.0225	0.00366	7.837e-10	+	173480	0	173480	Astle-W_Blood-Cell-Traits_EUR_2016
			chr16:85945839	chr16:85912233	Sum neutrophil eosinophil counts	Astle W	27863252	European	2016	0.02144	0.003657	4.517e-09	+	173480	0	173480	Astle-W_Blood-Cell-Traits_EUR_2016
		rs62191117	chr2:239900775	chr2:238979079	Forced expiratory volume in 1-second	Neale B	UKBB	European	2017	0.01507	0.00257	4.538e-09	+	307638	0	307638	Neale-B_UKBB_EUR_2017
			chr2:239900775	chr2:238979079	Forced expiratory volume in 1-second, best measure	Neale B	UKBB	European	2017	0.01602	0.002827	1.445e-08	+	255492	0	255492	Neale-B_UKBB_EUR_2017
			chr2:239900775	chr2:238979079	Forced expiratory volume in 1-second, predicted percentage	Neale B	UKBB	European	2017	0.02696	0.005258	2.931e-07	+	110423	0	110423	Neale-B_UKBB_EUR_2017
		rs67737557	chr20:29836081	chr20:31248278	Mean corpuscular hemoglobin	Astle W	27863252	European	2016	0.02372	0.004772	6.636e-07	+	173480	0	173480	Astle-W_Blood-Cell-Traits_EUR_2016
			chr20:29836081	chr20:31248278	Mean corpuscular volume	Astle W	27863252	European	2016	0.02637	0.004758	2.978e-08	+	173480	0	173480	Astle-W_Blood-Cell-Traits_EUR_2016
			chr20:29836081	chr20:31248278	Red blood cell count	Astle W	27863252	European	2016	-0.02701	0.004794	1.77e-08	-	173480	0	173480	Astle-W_Blood-Cell-Traits_EUR_2016
			chr20:29836081	chr20:31248278	Sitting height	Neale B	UKBB	European	2017	0.01315	0.00253	2.022e-07	+	336172	0	336172	Neale-B_UKBB_EUR_2017
		rs9537886	chr13:58545246	chr13:57971112	Mean time to correctly identify matches	Neale B	UKBB	European	2017	-0.01144	0.002412	2.091e-06	-	335139	0	335139	Neale-B_UKBB_EUR_2017
			chr13:58545246	chr13:57971112	Qualifications: college or university degree	Neale B	UKBB	European	2017	0.007174	0.001144	3.595e-10	+	334070	106305	227765	Neale-B_UKBB_EUR_2017
			chr13:58545246	chr13:57971112	Years of educational attainment	SSGAC	27225129	European	2016	0.012	0.003	3.216e-06	+	328917	0	328917	SSGAC_EduYears_EUR_2016
	family.Christensenellaceae.id.1866	rs870002	chr8:62220151	chr8:61307592	Number of days or week walked 10+ minutes	Neale B	UKBB	European	2017	-0.02228	0.004786	3.239e-06	-	331654	0	331654	Neale-B_UKBB_EUR_2017
	family.Streptococcaceae.id.1850	rs2952251	chr8:10143164	chr8:10285654	Eosinophil percentage of white cells	Astle W	27863252	European	2016	0.0187	0.004068	4.281e-06	+	173480	0	173480	Astle-W_Blood-Cell-Traits_EUR_2016
			chr8:10143164	chr8:10285654	Irritability	Neale B	UKBB	European	2017	-0.008671	0.001276	1.094e-11	-	322668	90282	232386	Neale-B_UKBB_EUR_2017
			chr8:10143164	chr8:10285654	Miserableness	Neale B	UKBB	European	2017	-0.006767	0.001376	8.806e-07	-	331856	141755	190101	Neale-B_UKBB_EUR_2017
			chr8:10143164	chr8:10285654	Mood swings	Neale B	UKBB	European	2017	-0.006612	0.001401	2.369e-06	-	329428	148601	180827	Neale-B_UKBB_EUR_2017
			chr8:10143164	chr8:10285654	Neuroticism score	Neale B	UKBB	European	2017	-0.06289	0.009941	2.519e-10	-	274108	0	274108	Neale-B_UKBB_EUR_2017
			chr8:10143164	chr8:10285654	Past tobacco smoking	Neale B	UKBB	European	2017	-0.01861	0.003621	2.765e-07	-	310749	0	310749	Neale-B_UKBB_EUR_2017
			chr8:10143164	chr8:10285654	Sensitivity or hurt feelings	Neale B	UKBB	European	2017	-0.007168	0.001377	1.924e-07	-	327832	182340	145492	Neale-B_UKBB_EUR_2017
			chr8:10143164	chr8:10285654	Smoking status: previous	Neale B	UKBB	European	2017	0.006534	0.00133	8.938e-07	+	336024	118419	217605	Neale-B_UKBB_EUR_2017
			chr8:10143164	chr8:10285654	Worrier or anxious feelings	Neale B	UKBB	European	2017	-0.008383	0.001378	1.194e-09	-	328717	186559	142158	Neale-B_UKBB_EUR_2017
			chr8:10143164	chr8:10285654	Neuroticism	SSGAC	27089181	European	2016	-0.018	0.004	8.555e-06	-	170911	0	170911	SSGAC_Neuroticism_EUR_2016
		rs35344081	chr16:991253	chr16:941253	Arm fat-free mass left	Neale B	UKBB	European	2017	-0.008226	0.001821	6.236e-06	-	331159	0	331159	Neale-B_UKBB_EUR_2017
			chr16:991253	chr16:941253	Arm fat-free mass right	Neale B	UKBB	European	2017	-0.009222	0.001784	2.364e-07	-	331221	0	331221	Neale-B_UKBB_EUR_2017
			chr16:991253	chr16:941253	Arm predicted mass right	Neale B	UKBB	European	2017	-0.008939	0.001778	4.967e-07	-	331216	0	331216	Neale-B_UKBB_EUR_2017
			chr16:991253	chr16:941253	Comparative height size at age 10	Neale B	UKBB	European	2017	-0.0147	0.001955	5.439e-14	-	332021	0	332021	Neale-B_UKBB_EUR_2017
			chr16:991253	chr16:941253	Height	Neale B	UKBB	European	2017	-0.01514	0.002035	1.008e-13	-	336474	0	336474	Neale-B_UKBB_EUR_2017
			chr16:991253	chr16:941253	Sitting height	Neale B	UKBB	European	2017	-0.01002	0.002213	5.922e-06	-	336172	0	336172	Neale-B_UKBB_EUR_2017
			chr16:991253	chr16:941253	Trunk fat-free mass	Neale B	UKBB	European	2017	-0.008647	0.001804	1.637e-06	-	331030	0	331030	Neale-B_UKBB_EUR_2017
			chr16:991253	chr16:941253	Trunk predicted mass	Neale B	UKBB	European	2017	-0.008702	0.001798	1.299e-06	-	330995	0	330995	Neale-B_UKBB_EUR_2017
		rs6806351	chr3:132058723	chr3:132339879	Qualifications: college or university degree	Neale B	UKBB	European	2017	0.006092	0.001356	7.008e-06	+	334070	106305	227765	Neale-B_UKBB_EUR_2017
	family.Victivallaceae.id.2255	rs2546105	chr5:94692439	chr5:95356735	Mean time to correctly identify matches	Neale B	UKBB	European	2017	-0.01227	0.002665	4.094e-06	-	335139	0	335139	Neale-B_UKBB_EUR_2017
	genus..Eubacteriumhalliigroup.id.11338	rs281379	chr19:49214274	chr19:48711017	Mean platelet volume	Astle W	27863252	European	2016	-0.02253	0.003624	5.07e-10	-	173480	0	173480	Astle-W_Blood-Cell-Traits_EUR_2016
			chr19:49214274	chr19:48711017	Height SDS for males aged 12 years	EGGC	23449627	European	2013	-0.08167	0.01726	2.852e-06	-	6986	0	6986	EGGC_Puberty-Growth-12-M_EUR_2013
			chr19:49214274	chr19:48711017	Low density lipoprotein	GLGC	24097068	European	2013	0.0281	0.0057	3.721e-07	+	88350	0	88350	GLGC_LDL_EUR_2013
			chr19:49214274	chr19:48711017	Low density lipoprotein	GLGC	20686565	Mixed	2010	0.026	0.0057	4.088e-07	+	95454	0	95454	GLGC_LDL_Mixed_2010
			chr19:49214274	chr19:48711017	Total cholesterol	GLGC	24097068	European	2013	0.031	0.0055	1.485e-08	+	92979	0	92979	GLGC_TC_EUR_2013
			chr19:49214274	chr19:48711017	Total cholesterol	GLGC	20686565	Mixed	2010	0.0296	0.0055	6.498e-09	+	100184	0	100184	GLGC_TC_Mixed_2010
			chr19:49214274	chr19:48711017	Crohns disease	Franke A	21102463	European	2010	NA	NA	7.4e-12	NA	21389	-	-	GRASP
			chr19:49214274	chr19:48711017	Crohns disease	Anderson CA	21297633	European	2011	NA	NA	8.6e-10	NA	26405	-	-	GRASP
			chr19:49214274	chr19:48711017	Height pubertal	EGGC	23449627	European	2013	NA	NA	2.85e-06	NA	14040	-	-	GRASP
			chr19:49214274	chr19:48711017	LDL cholesterol	GLGC	20686565	Mixed	2010	NA	NA	4.088e-07	NA	100184	-	-	GRASP
			chr19:49214274	chr19:48711017	Psoriasis	Ellinghaus D	22482804	European	2012	NA	NA	7.86e-08	NA	15131	-	-	GRASP
			chr19:49214274	chr19:48711017	Psoriasis and Crohns disease combined	Ellinghaus D	22482804	European	2012	NA	NA	1.32e-17	NA	15131	-	-	GRASP
			chr19:49214274	chr19:48711017	Total cholesterol	GLGC	20686565	Mixed	2010	NA	NA	6.498e-09	NA	100184	-	-	GRASP
			chr19:49214274	chr19:48711017	Crohns disease	IBDGC	23128233	European	2012	NA	NA	8.6e-10	NA	14342	6299	8043	IBDGC_Chrons-Disease_EUR_2012
			chr19:49214274	chr19:48711017	Crohns disease	IBDGC	26192919	European	2015	0.1398	0.0238	4.264e-09	+	20883	5956	14927	IBDGC_Chrons-Disease_EUR_2015
			chr19:49214274	chr19:48711017	Crohns disease	Franke A	21102463	European	2010	0.06766	0.009866	7e-12	+	-	-	-	NHGRI-EBI_GWAS_Catalog
			chr19:49214274	chr19:48711017	Pubertal anthropometrics	EGGC	23449627	European	2013	-0.07	0.01284	5e-08	-	-	-	-	NHGRI-EBI_GWAS_Catalog
			chr19:49214274	chr19:48711017	Alcohol intake frequency	Neale B	UKBB	European	2017	-0.02002	0.00357	2.069e-08	-	336965	0	336965	Neale-B_UKBB_EUR_2017
			chr19:49214274	chr19:48711017	Alcohol intake versus 10 years previously	Neale B	UKBB	European	2017	-0.008895	0.001854	1.603e-06	-	313248	0	313248	Neale-B_UKBB_EUR_2017
			chr19:49214274	chr19:48711017	Bring up phlegm or sputum/mucus on most days	Neale B	UKBB	European	2017	0.007469	0.001357	3.687e-08	+	83529	6998	76531	Neale-B_UKBB_EUR_2017
			chr19:49214274	chr19:48711017	Cholelithiasis	Neale B	UKBB	European	2017	0.002244	0.0003482	1.158e-10	+	337199	6986	330213	Neale-B_UKBB_EUR_2017
			chr19:49214274	chr19:48711017	Comparative body size at age 10	Neale B	UKBB	European	2017	-0.007677	0.001671	4.335e-06	-	331693	0	331693	Neale-B_UKBB_EUR_2017
			chr19:49214274	chr19:48711017	Comparative height size at age 10	Neale B	UKBB	European	2017	-0.008412	0.001666	4.458e-07	-	332021	0	332021	Neale-B_UKBB_EUR_2017
			chr19:49214274	chr19:48711017	Medication for cholesterol, blood pressure or diabetes: cholesterol lowering medication	Neale B	UKBB	European	2017	0.00833	0.001525	4.703e-08	+	154702	35840	118862	Neale-B_UKBB_EUR_2017
			chr19:49214274	chr19:48711017	Medication for cholesterol, blood pressure or diabetes: none of the above	Neale B	UKBB	European	2017	-0.007952	0.001705	3.106e-06	-	154702	103004	51698	Neale-B_UKBB_EUR_2017
			chr19:49214274	chr19:48711017	Mouth or teeth dental problems: dentures	Neale B	UKBB	European	2017	0.004887	0.0009173	9.929e-08	+	336138	56894	279244	Neale-B_UKBB_EUR_2017
			chr19:49214274	chr19:48711017	Mouth or teeth dental problems: none of the above	Neale B	UKBB	European	2017	-0.005472	0.001196	4.763e-06	-	336138	204310	131828	Neale-B_UKBB_EUR_2017
			chr19:49214274	chr19:48711017	No treatment with medication for cholesterol, blood pressure, diabetes, or take exogenous hormones	Neale B	UKBB	European	2017	-0.007834	0.00155	4.323e-07	-	180203	124239	55964	Neale-B_UKBB_EUR_2017
			chr19:49214274	chr19:48711017	Number of self-reported non-cancer illnesses	Neale B	UKBB	European	2017	0.009452	0.002016	2.754e-06	+	337159	0	337159	Neale-B_UKBB_EUR_2017
			chr19:49214274	chr19:48711017	Peak expiratory flow	Neale B	UKBB	European	2017	-0.0112	0.002173	2.573e-07	-	307638	0	307638	Neale-B_UKBB_EUR_2017
			chr19:49214274	chr19:48711017	Self-reported cholelithiasis or gall stones	Neale B	UKBB	European	2017	0.001615	0.0003116	2.186e-07	+	337159	5573	331586	Neale-B_UKBB_EUR_2017
			chr19:49214274	chr19:48711017	Self-reported high cholesterol	Neale B	UKBB	European	2017	0.006527	0.0007999	3.351e-16	+	337159	41296	295863	Neale-B_UKBB_EUR_2017
			chr19:49214274	chr19:48711017	Self-reported hypertension	Neale B	UKBB	European	2017	0.005743	0.001071	8.171e-08	+	337159	87690	249469	Neale-B_UKBB_EUR_2017
			chr19:49214274	chr19:48711017	Sitting height	Neale B	UKBB	European	2017	-0.009377	0.001886	6.668e-07	-	336172	0	336172	Neale-B_UKBB_EUR_2017
			chr19:49214274	chr19:48711017	Sodium in urine	Neale B	UKBB	European	2017	-0.01374	0.002376	7.436e-09	-	326831	0	326831	Neale-B_UKBB_EUR_2017
			chr19:49214274	chr19:48711017	Treatment with cholesterol lowering medication	Neale B	UKBB	European	2017	0.005298	0.001111	1.874e-06	+	180203	22705	157498	Neale-B_UKBB_EUR_2017
			chr19:49214274	chr19:48711017	Treatment with simvastatin	Neale B	UKBB	European	2017	0.004131	0.0007739	9.385e-08	+	337159	38492	298667	Neale-B_UKBB_EUR_2017
			chr19:49214274	chr19:48711017	Vascular or heart problems diagnosed by doctor: high blood pressure	Neale B	UKBB	European	2017	0.005005	0.001086	4.014e-06	+	336683	91033	245650	Neale-B_UKBB_EUR_2017
			chr19:49214274	chr19:48711017	Vascular or heart problems diagnosed by doctor: none of the above	Neale B	UKBB	European	2017	-0.005464	0.001115	9.531e-07	-	336683	236530	100153	Neale-B_UKBB_EUR_2017
			chr19:49214274	chr19:48711017	Alkaline phosphatase	Prins B	28887542	European	2017	-0.01	NA	3.929e-12	-	9961	0	9961	Prins-B_ALKP_EUR_2017
		rs60254196	chr7:148856720	chr7:149159628	Eosinophil count	Astle W	27863252	European	2016	-0.03061	0.003613	2.431e-17	-	173480	0	173480	Astle-W_Blood-Cell-Traits_EUR_2016
			chr7:148856720	chr7:149159628	Eosinophil percentage of granulocytes	Astle W	27863252	European	2016	-0.03284	0.003625	1.325e-19	-	173480	0	173480	Astle-W_Blood-Cell-Traits_EUR_2016
			chr7:148856720	chr7:149159628	Eosinophil percentage of white cells	Astle W	27863252	European	2016	-0.03355	0.003609	1.467e-20	-	173480	0	173480	Astle-W_Blood-Cell-Traits_EUR_2016
			chr7:148856720	chr7:149159628	Neutrophil percentage of granulocytes	Astle W	27863252	European	2016	0.02965	0.003626	2.865e-16	+	173480	0	173480	Astle-W_Blood-Cell-Traits_EUR_2016
			chr7:148856720	chr7:149159628	Sum eosinophil basophil counts	Astle W	27863252	European	2016	-0.026	0.003617	6.661e-13	-	173480	0	173480	Astle-W_Blood-Cell-Traits_EUR_2016
		rs949971	chr3:110283389	chr3:110564542	Sensitivity or hurt feelings	Neale B	UKBB	European	2017	0.00596	0.001245	1.703e-06	+	327832	182340	145492	Neale-B_UKBB_EUR_2017
	genus.Anaerotruncus.id.2054	rs7155595	chr14:77502546	chr14:77036203	Nervous feelings	Neale B	UKBB	European	2017	0.006702	0.001119	2.079e-09	+	328725	77767	250958	Neale-B_UKBB_EUR_2017
			chr14:77502546	chr14:77036203	Types of transport used, excluding work: walk	Neale B	UKBB	European	2017	0.00675	0.001306	2.387e-07	+	335650	165354	170296	Neale-B_UKBB_EUR_2017
