# Supplementary material for: Gut microbiota and venous thromboembolism: a two-sample Mendelian randomization study Gut microbiota and venous thromboembolism
Source: Research Square preprint supplement (doi:10.21203/rs.3.rs-3834627/v1), 2024-01-08
Supplement: Supplementary file 2 [file 05b35c3241e4d60b075f922b.xlsx]

## Sheet: Sheet2
Table S2 Instrumental variables (IVs) used in MR analysis of the association between 196 bacterial traits and DVT among European populations
						Gut microbiota						Deep vein thrombosis (DVT)
Gut microbiota	SNP	Chr	Pos	R2	F	Effect allele	Other allele	beta	se	P-value	Samplesize	Effect allele	Other allele	beta	se	P-value	Samplesize
class.Actinobacteria.id.419	rs10841473	12	20378911	0.00137119	22.3934	G	C	-0.0583765	0.0123353	2.59e-06	16311	G	C	-0.000458684	0.000331323	0.17	462933
class.Actinobacteria.id.419	rs11655079	17	75348675	0.00124627	20.3482	T	C	-0.0560674	0.0124286	5.93e-06	16309	T	C	-0.000155657	0.000322632	0.630001	462933
class.Actinobacteria.id.419	rs11745923	5	475408	0.00145768	23.8095	G	T	0.0563759	0.0115529	1.58e-06	16312	G	T	-0.000126214	0.000296408	0.67	462933
class.Actinobacteria.id.419	rs12049045	1	114665485	0.00122072	19.9331	A	G	0.0510452	0.0114325	8.63e-06	16311	A	G	-0.000103047	0.000301652	0.73	462933
class.Actinobacteria.id.419	rs12899991	15	49208992	0.0013372	21.6649	A	T	0.0719923	0.0154661	4.03e-06	16182	A	T	-0.000381067	0.000415653	0.36	462933
class.Actinobacteria.id.419	rs134366	22	35567355	0.00158206	22.6593	G	A	0.111877	0.023501	1.5e-06	14302	G	A	0.000200757	0.000645724	0.760001	462933
class.Actinobacteria.id.419	rs1376754	2	161611969	0.00126456	20.4864	G	A	0.0509242	0.0112503	6.71e-06	16182	G	A	0.000317843	0.0002949	0.28	462933
class.Actinobacteria.id.419	rs1515761	10	126110032	0.0012953	20.1331	T	C	0.0762317	0.0169884	4.96e-06	15525	T	C	0.000510044	0.000419229	0.22	462933
class.Actinobacteria.id.419	rs182549	2	136616754	0.00520644	85.3667	C	T	0.111489	0.012066	3.79e-20	16313	C	T	-0.000826711	0.000328573	0.012	462933
class.Actinobacteria.id.419	rs4945008	11	71221248	0.00121486	19.8397	A	G	0.0540741	0.0121393	5.39e-06	16313	A	G	0.000147509	0.000349721	0.67	462933
class.Actinobacteria.id.419	rs6660520	1	207003553	0.00171304	27.9808	A	G	0.0711483	0.0134495	1.11e-07	16308	A	G	6.21571e-05	0.000367976	0.87	462933
class.Actinobacteria.id.419	rs72767435	15	94852795	0.00165048	21.3198	T	C	-0.126352	0.0273626	2.57e-06	12898	T	C	4.37814e-05	0.000680304	0.95	462933
class.Actinobacteria.id.419	rs7322849	13	112859829	0.00146621	23.9504	T	C	0.0944467	0.0192976	6.21e-07	16313	T	C	5.30802e-05	0.00063144	0.93	462933
class.Actinobacteria.id.419	rs7700479	5	18019549	0.00119887	19.5783	T	A	-0.0769653	0.0173933	8.62e-06	16313	T	A	-0.000127423	0.00049226	0.8	462933
class.Actinobacteria.id.419	rs80083040	8	65654844	0.0024975	20.0325	T	G	0.155784	0.0348017	8.62e-06	8003	T	G	0.000675793	0.000635856	0.29	462933
class.Actinobacteria.id.419	rs8047955	16	81776768	0.00148925	24.317	A	G	0.0575816	0.0116762	8.34e-07	16306	A	G	-0.000376998	0.000304636	0.22	462933
class.Actinobacteria.id.419	rs857444	6	14617591	0.00119402	19.4978	C	T	0.0509553	0.011539	8.92e-06	16312	C	T	-1.97391e-05	0.000305818	0.95	462933
class.Actinobacteria.id.419	rs961091	7	95654718	0.00121456	19.8324	G	A	0.0501255	0.011255	8.68e-06	16311	G	A	-0.000413192	0.00029692	0.16	462933
class.Alphaproteobacteria.id.2379	rs10803434	1	14238305	0.00237008	21.6499	A	T	-0.0692742	0.0148866	3.55e-06	9115	A	T	0.000336428	0.000294362	0.25	462933
class.Alphaproteobacteria.id.2379	rs12977163	19	28641647	0.00220395	20.1289	G	C	0.0690234	0.0153829	7.14e-06	9115	G	C	0.000193475	0.00030019	0.52	462933
class.Alphaproteobacteria.id.2379	rs140912403	9	95517807	0.00299303	25.5712	C	T	-0.160677	0.0317708	6.2e-07	8520	C	T	1.84779e-05	0.000612696	0.98	462933
class.Alphaproteobacteria.id.2379	rs17061716	3	59982336	0.00210435	19.9555	G	C	0.0927341	0.0207569	9.33e-06	9465	G	C	0.000100023	0.000416536	0.81	462933
class.Alphaproteobacteria.id.2379	rs34569731	2	75630344	0.00219247	20.0239	A	G	0.0705145	0.0157564	7.38e-06	9115	A	G	0.000541552	0.000335924	0.11	462933
class.Alphaproteobacteria.id.2379	rs55876211	3	84471266	0.00200405	19.2514	C	T	-0.080811	0.0184159	7.54e-06	9589	C	T	-0.000238802	0.000377922	0.53	462933
class.Alphaproteobacteria.id.2379	rs62285697	3	176407911	0.00216888	19.8079	C	T	0.0805256	0.0180912	9.76e-06	9115	C	T	1.45042e-05	0.000352259	0.97	462933
class.Alphaproteobacteria.id.2379	rs76784716	2	169033340	0.0025762	24.7722	A	G	0.133271	0.0267738	5.09e-07	9593	A	G	-0.000644152	0.000579916	0.27	462933
class.Alphaproteobacteria.id.2379	rs7960664	12	89471235	0.00211155	20.301	G	A	0.0969489	0.0215149	8.84e-06	9596	G	A	0.000147151	0.000410557	0.719999	462933
class.Alphaproteobacteria.id.2379	rs9813022	3	13726736	0.00247902	23.8353	A	G	-0.0751277	0.0153867	1.05e-06	9593	A	G	4.08691e-05	0.000318796	0.9	462933
class.Bacilli.id.1673	rs11110282	12	100585559	0.00135028	21.6661	A	G	-0.101189	0.0217379	4.85e-06	16026	A	G	-0.00124978	0.000597266	0.0359998	462933
class.Bacilli.id.1673	rs111552159	4	184681021	0.00175127	19.9083	C	G	0.128032	0.0286921	9.13e-06	11350	C	G	-0.000144596	0.000645156	0.82	462933
class.Bacilli.id.1673	rs11730038	4	98049499	0.00137994	24.0097	G	A	-0.0630747	0.0128717	1.96e-06	17377	G	A	-4.1731e-05	0.000343134	0.9	462933
class.Bacilli.id.1673	rs12797734	11	8332350	0.00120332	20.3606	T	C	0.0572158	0.0126793	7.21e-06	16902	T	C	-0.000196725	0.000337518	0.56	462933
class.Bacilli.id.1673	rs13068444	3	64398863	0.00112355	19.4121	A	G	0.0601035	0.0136407	9.53e-06	17260	A	G	-0.000293228	0.000383913	0.44	462933
class.Bacilli.id.1673	rs1595463	2	231723657	0.00111063	19.2975	C	A	0.0476864	0.0108547	7.97e-06	17358	C	A	0.000257139	0.000294094	0.38	462933
class.Bacilli.id.1673	rs1962325	3	4800550	0.0013413	23.3083	C	G	0.0554219	0.0114789	1.38e-06	17356	C	G	8.66992e-05	0.000315966	0.780001	462933
class.Bacilli.id.1673	rs28564647	9	101101172	0.00114188	19.8525	T	G	-0.0613034	0.0137579	7.81e-06	17368	T	G	-0.000322562	0.000366602	0.38	462933
class.Bacilli.id.1673	rs2952251	8	10143164	0.0013439	23.3588	A	G	-0.0598868	0.0123903	1.08e-06	17360	A	G	-0.000649415	0.000332402	0.051	462933
class.Bacilli.id.1673	rs34989881	19	51959855	0.00156887	20.3708	A	G	0.111056	0.0246039	6.55e-06	12966	A	G	-0.000417742	0.000569711	0.46	462933
class.Bacilli.id.1673	rs35344081	16	991253	0.00136637	23.769	G	A	0.0619529	0.0127066	1.01e-06	17374	G	A	0.000242682	0.000343789	0.48	462933
class.Bacilli.id.1673	rs4028634	17	40835649	0.00129111	22.462	T	C	0.0520614	0.0109842	2.21e-06	17377	T	C	-5.06315e-05	0.000299622	0.87	462933
class.Bacilli.id.1673	rs4459992	4	7431487	0.00121995	21.2042	T	C	0.0535854	0.0116362	4.3e-06	17362	T	C	-0.000331904	0.000315632	0.29	462933
class.Bacilli.id.1673	rs57872228	1	200418805	0.00136544	23.7542	C	T	-0.0714773	0.0146647	9.22e-07	17375	C	T	-1.82041e-05	0.000405048	0.96	462933
class.Bacilli.id.1673	rs694949	15	58738075	0.00122221	20.3111	A	G	-0.081146	0.0180042	7.6e-06	16600	A	G	-3.55838e-05	0.000468333	0.94	462933
class.Bacilli.id.1673	rs74352383	6	67570929	0.00140072	23.1682	T	A	-0.104496	0.0217083	1.53e-06	16519	T	A	-6.33421e-05	0.000565556	0.91	462933
class.Bacilli.id.1673	rs74663707	3	184371224	0.00120946	19.0926	C	T	0.0979154	0.0224074	8.46e-06	15769	C	T	0.000563476	0.000538805	0.3	462933
class.Bacilli.id.1673	rs7666190	4	151687420	0.0016846	17.6068	C	A	-0.104044	0.0247934	8.47e-06	10436	C	A	-0.000225164	0.00064082	0.73	462933
class.Bacilli.id.1673	rs76717940	3	94153993	0.00286119	22.9982	T	A	0.156331	0.0325945	1.07e-06	8017	T	A	-0.000185953	0.000605315	0.760001	462933
class.Bacilli.id.1673	rs77558518	5	174173171	0.00146021	23.1548	A	G	-0.107255	0.0222879	1.34e-06	15836	A	G	0.000279855	0.000567848	0.62	462933
class.Bacilli.id.1673	rs78938557	7	36349586	0.001411	21.5113	T	C	0.108007	0.0232858	1.07e-06	15226	T	C	-5.09916e-05	0.00059353	0.93	462933
class.Bacilli.id.1673	rs9581006	13	24973509	0.00542712	23.1966	C	T	0.225309	0.0467697	1.79e-06	4253	C	T	0.000263873	0.000746002	0.719999	462933
class.Bacteroidia.id.912	rs11146701	10	39062269	0.00110668	20.1839	A	G	0.0473596	0.010541	7.08e-06	18220	A	G	0.000578021	0.000295522	0.05	462933
class.Bacteroidia.id.912	rs111845179	14	59317502	0.00140359	23.0387	T	C	0.102648	0.0213843	9.24e-07	16393	T	C	-8.33092e-05	0.000631056	0.89	462933
class.Bacteroidia.id.912	rs13291169	9	116888284	0.00122573	21.4901	C	G	0.0689676	0.0148765	3.75e-06	17513	C	G	0.000290363	0.000404506	0.47	462933
class.Bacteroidia.id.912	rs17343978	22	27433885	0.00114773	21.0645	A	C	-0.0552057	0.0120278	8.36e-06	18334	A	C	-0.000496427	0.000334938	0.14	462933
class.Bacteroidia.id.912	rs2032750	2	53831026	0.00126746	22.6542	T	C	-0.0508393	0.0106807	1.92e-06	17853	T	C	-0.000276832	0.000292514	0.34	462933
class.Bacteroidia.id.912	rs4146051	2	213189994	0.00167719	19.1017	A	G	-0.107377	0.0245661	8.76e-06	11372	A	G	-0.000325872	0.000700421	0.64	462933
class.Bacteroidia.id.912	rs4916508	3	195936789	0.00107074	19.6392	G	A	-0.0466729	0.0105312	8.47e-06	18324	G	A	8.30352e-05	0.000292769	0.780001	462933
class.Bacteroidia.id.912	rs55773148	13	70523029	0.00231565	26.3366	G	A	-0.121514	0.0236759	3.9e-07	11349	G	A	0.000997419	0.000677775	0.14	462933
class.Bacteroidia.id.912	rs62531359	8	70916181	0.00104357	19.136	T	G	0.0655728	0.0149891	9.09e-06	18320	T	G	-0.000431205	0.00042308	0.31	462933
class.Bacteroidia.id.912	rs62575403	9	136493820	0.00209157	20.2595	C	T	0.140055	0.0311128	7.06e-06	9668	C	T	-0.000426781	0.000671053	0.52	462933
class.Bacteroidia.id.912	rs72706335	1	157495438	0.00529119	20.3039	T	C	-0.22241	0.0493458	7.66e-06	3819	T	C	-0.000477514	0.000667391	0.47	462933
class.Bacteroidia.id.912	rs7546249	1	176792690	0.00125015	22.9452	T	A	-0.0567113	0.0118386	1.55e-06	18333	T	A	-0.00029865	0.000326652	0.36	462933
class.Bacteroidia.id.912	rs7631304	3	89339527	0.00128504	23.5876	G	A	-0.0645771	0.0132957	8.37e-07	18334	G	A	0.000100384	0.00038332	0.79	462933
class.Bacteroidia.id.912	rs79585701	8	13110185	0.00101823	18.6851	A	C	0.0646823	0.0149628	9.99e-06	18334	A	C	-0.000221213	0.000401295	0.58	462933
class.Bacteroidia.id.912	rs929878	16	74290641	0.00110994	20.3701	C	T	-0.0548532	0.012153	4.73e-06	18334	C	T	4.27687e-05	0.000330682	0.9	462933
class.Betaproteobacteria.id.2867	rs11128180	3	70592215	0.00123475	21.2008	A	G	0.0592944	0.0128769	3.67e-06	17151	A	G	0.000240916	0.000342614	0.48	462933
class.Betaproteobacteria.id.2867	rs12467854	2	239888758	0.0013886	23.6891	G	C	0.0641363	0.0131766	1.1e-06	17038	G	C	0.000401648	0.000356241	0.26	462933
class.Betaproteobacteria.id.2867	rs1511453	4	23588462	0.00125692	21.499	A	G	0.0923492	0.0199158	4.76e-06	17085	A	G	-0.000162975	0.000615496	0.79	462933
class.Betaproteobacteria.id.2867	rs1928341	1	153240013	0.0013196	22.6584	A	G	0.0525581	0.0110408	2.02e-06	17150	A	G	-0.000265375	0.000294907	0.37	462933
class.Betaproteobacteria.id.2867	rs2321387	13	58689340	0.00118993	20.428	G	A	-0.0494596	0.0109424	5.8e-06	17149	G	A	0.000139968	0.000294137	0.630001	462933
class.Betaproteobacteria.id.2867	rs2367850	3	193456274	0.0014397	24.0993	G	C	0.064006	0.0130374	9.12e-07	16717	G	C	-0.000334854	0.000375654	0.37	462933
class.Betaproteobacteria.id.2867	rs2613606	7	111285025	0.00128859	22.12	C	T	-0.0513106	0.0109091	2.2e-06	17146	C	T	0.000363133	0.000293803	0.22	462933
class.Betaproteobacteria.id.2867	rs320161	9	104899117	0.00120571	20.5617	A	G	0.0572286	0.01262	7.33e-06	17035	A	G	0.000224	0.000331284	0.5	462933
class.Betaproteobacteria.id.2867	rs4033856	4	45642485	0.00155141	24.7725	C	T	0.0832423	0.0167237	5.17e-07	15945	C	T	8.62757e-05	0.000452564	0.85	462933
class.Betaproteobacteria.id.2867	rs56386628	8	112732674	0.00122499	21.0281	C	T	-0.0622252	0.0135688	5.87e-06	17147	C	T	0.000356224	0.000364815	0.33	462933
class.Betaproteobacteria.id.2867	rs6087811	20	30596130	0.00149789	24.2753	T	G	-0.0978177	0.0198522	7.44e-07	16184	T	G	-0.000246187	0.000554509	0.66	462933
class.Betaproteobacteria.id.2867	rs62395635	5	173497796	0.00142917	21.62	T	C	0.109741	0.0236	2.94e-06	15108	T	C	0.000124458	0.000595225	0.83	462933
class.Betaproteobacteria.id.2867	rs72747231	9	84206018	0.00196694	22.353	C	G	-0.137281	0.0290338	2.06e-06	11344	C	G	-7.82795e-05	0.000625113	0.9	462933
class.Betaproteobacteria.id.2867	rs75242906	15	56786407	0.00171885	18.5972	C	T	-0.121083	0.028075	9.27e-06	10803	C	T	-0.000212023	0.000611734	0.73	462933
class.Betaproteobacteria.id.2867	rs9964679	18	26569901	0.00123562	21.2158	A	G	0.052911	0.0114866	4.85e-06	17151	A	G	-5.34038e-05	0.00032093	0.87	462933
class.Clostridia.id.1859	rs10209007	2	231676041	0.00106286	18.9497	G	C	0.0794173	0.0182427	9.89e-06	17812	G	C	0.00028024	0.000520577	0.59	462933
class.Clostridia.id.1859	rs10774377	12	5942519	0.00116559	21.3879	A	G	0.052659	0.0113858	3.24e-06	18330	A	G	0.000430527	0.000317652	0.18	462933
class.Clostridia.id.1859	rs112334273	21	40703251	0.00138766	25.3114	G	A	0.0641008	0.0127404	3.81e-07	18217	G	A	-0.000213677	0.000355375	0.55	462933
class.Clostridia.id.1859	rs13105690	4	7420184	0.00109172	20.0418	T	C	-0.0529097	0.011818	8.78e-06	18340	T	C	8.48859e-05	0.000329233	0.8	462933
class.Clostridia.id.1859	rs13179700	5	149077788	0.00118903	21.8279	T	C	0.0511937	0.0109569	3.37e-06	18338	T	C	0.000270522	0.000307075	0.38	462933
class.Clostridia.id.1859	rs13421739	2	116724915	0.00133178	24.4547	C	G	0.0888472	0.0179655	9.54e-06	18340	C	G	-0.0002494	0.000590131	0.67	462933
class.Clostridia.id.1859	rs1842454	5	105060362	0.00100587	18.4642	G	A	-0.0547202	0.0127338	8.72e-06	18340	G	A	0.000410184	0.000347291	0.24	462933
class.Clostridia.id.1859	rs2273429	14	52494072	0.00121811	22.3612	A	G	-0.0724037	0.0153105	4.52e-06	18337	A	G	-0.000276116	0.000450151	0.54	462933
class.Clostridia.id.1859	rs6797343	3	89268714	0.00105533	19.373	G	T	0.0592279	0.0134556	9.36e-06	18340	G	T	0.000305743	0.000396659	0.44	462933
class.Clostridia.id.1859	rs6814436	4	161507301	0.00131127	24.0724	T	C	0.0739995	0.0150815	9.65e-07	18336	T	C	-0.000165994	0.000421187	0.69	462933
class.Clostridia.id.1859	rs6815608	4	152131744	0.00144607	24.2263	T	C	0.103803	0.0210883	4.02e-07	16731	T	C	0.000289922	0.000640005	0.649999	462933
class.Clostridia.id.1859	rs6934062	6	163743050	0.00114078	20.3942	G	C	0.0524406	0.0116115	6.53e-06	17859	G	C	-0.00036477	0.000320313	0.25	462933
class.Clostridia.id.1859	rs7269302	20	50803760	0.00118645	20.6722	A	T	-0.0963981	0.0212007	9.04e-06	17405	A	T	0.000348116	0.000609154	0.57	462933
class.Clostridia.id.1859	rs72738886	5	35770550	0.00122072	20.6945	T	C	0.086617	0.0190393	8.24e-06	16934	T	C	0.00059979	0.000495493	0.23	462933
class.Clostridia.id.1859	rs72915163	18	48792829	0.00126648	23.2249	T	C	-0.0581025	0.0120557	1.34e-06	18317	T	C	0.0001937	0.000336041	0.56	462933
class.Clostridia.id.1859	rs76767978	3	131371980	0.00108937	19.9866	G	A	0.0698882	0.0156319	8.4e-06	18329	G	A	-0.000240829	0.000455982	0.6	462933
class.Clostridia.id.1859	rs76860606	6	12397187	0.00100574	17.6957	C	G	0.0947036	0.0225117	7.53e-06	17579	C	G	-7.4475e-05	0.000661665	0.91	462933
class.Coriobacteriia.id.809	rs11073596	15	86433579	0.00113478	19.9096	T	G	0.0510212	0.0114339	8.14e-06	17527	T	G	9.93674e-06	0.000318313	0.98	462933
class.Coriobacteriia.id.809	rs11250875	10	1922731	0.00121534	21.5232	T	C	0.06075	0.0130939	4.83e-06	17690	T	C	-0.000188162	0.000361659	0.6	462933
class.Coriobacteriia.id.809	rs11656361	17	8121332	0.0011624	19.3915	A	C	0.0773006	0.017553	8.02e-06	16665	A	C	0.000230896	0.00046297	0.62	462933
class.Coriobacteriia.id.809	rs12974142	19	52895166	0.00113949	19.8623	G	A	0.0789796	0.0177205	8.51e-06	17413	G	A	-0.000228959	0.000473566	0.630001	462933
class.Coriobacteriia.id.809	rs13307134	7	105084680	0.00114388	20.0695	C	T	0.0565686	0.0126265	7.8e-06	17527	C	T	0.000139539	0.000343056	0.68	462933
class.Coriobacteriia.id.809	rs1397793	5	90471451	0.00112166	19.6792	G	A	-0.0498855	0.0112446	9.77e-06	17527	G	A	-8.9955e-05	0.000319119	0.780001	462933
class.Coriobacteriia.id.809	rs1816223	12	11494021	0.00116623	20.65	A	G	-0.0586265	0.0129006	4.84e-06	17688	A	G	0.000530479	0.000361218	0.14	462933
class.Coriobacteriia.id.809	rs240104	1	176571431	0.0012858	22.6271	T	C	-0.0603429	0.0126849	1.52e-06	17577	T	C	-0.00013676	0.000352259	0.7	462933
class.Coriobacteriia.id.809	rs2442778	3	11654412	0.00150249	20.2689	G	A	-0.116408	0.0258545	9.03e-06	13472	G	A	-0.000405153	0.000681747	0.55	462933
class.Coriobacteriia.id.809	rs3025411	9	136512906	0.00124698	19.5632	A	G	0.0926543	0.0209468	8.27e-06	15671	A	G	-1.79815e-05	0.000541813	0.97	462933
class.Coriobacteriia.id.809	rs34739816	17	37376685	0.00129972	21.5917	G	T	0.0965017	0.0207666	3.88e-06	16593	G	T	0.000222633	0.000556845	0.69	462933
class.Coriobacteriia.id.809	rs62448869	7	24464799	0.00113362	19.8892	T	A	-0.0486059	0.0108982	7.87e-06	17527	T	A	0.000444818	0.000294565	0.13	462933
class.Coriobacteriia.id.809	rs67561917	20	62072077	0.00123808	21.4838	A	G	-0.0714367	0.0154113	5.39e-06	17333	A	G	-0.000120726	0.000428631	0.780001	462933
class.Coriobacteriia.id.809	rs719099	10	65799217	0.00140904	24.954	A	G	0.0778402	0.0155815	5.43e-07	17687	A	G	-0.000331102	0.000446844	0.46	462933
class.Coriobacteriia.id.809	rs76779974	5	125460084	0.0012364	20.3231	C	G	0.0774888	0.0171877	5.63e-06	16419	C	G	7.03959e-05	0.000441957	0.87	462933
class.Coriobacteriia.id.809	rs80046645	5	459415	0.00642656	20.7109	C	G	0.25584	0.0561995	4.66e-06	3204	C	G	1.08679e-05	0.0006467	0.99	462933
class.Coriobacteriia.id.809	rs8010111	14	39660509	0.00126919	20.3253	G	A	-0.103377	0.0229286	6.9e-06	15996	G	A	0.000323539	0.000574492	0.57	462933
class.Deltaproteobacteria.id.3087	rs1035691	11	10658735	0.00135551	20.5856	A	G	-0.055176	0.0121602	9.65e-06	15168	A	G	0.000162575	0.000303833	0.59	462933
class.Deltaproteobacteria.id.3087	rs112381107	9	15269705	0.00456613	20.4354	C	T	0.206594	0.0456908	4.63e-06	4457	C	T	-0.000665973	0.00067293	0.32	462933
class.Deltaproteobacteria.id.3087	rs11599763	10	11855599	0.00141479	21.4872	T	C	-0.0544219	0.0117397	3.94e-06	15168	T	C	3.62003e-05	0.000299581	0.9	462933
class.Deltaproteobacteria.id.3087	rs16851319	1	203308383	0.00144136	21.871	G	C	-0.0705516	0.0150849	5.68e-06	15154	G	C	-0.000101942	0.000391335	0.79	462933
class.Deltaproteobacteria.id.3087	rs17084793	18	69312914	0.00130732	19.8475	G	A	-0.0710762	0.015953	5.69e-06	15164	G	A	-0.000208033	0.000397826	0.6	462933
class.Deltaproteobacteria.id.3087	rs17791387	9	81834426	0.00150796	22.7577	A	G	-0.0735881	0.0154246	1.6e-06	15071	A	G	-0.000474512	0.000378563	0.21	462933
class.Deltaproteobacteria.id.3087	rs2692012	1	203991605	0.00144544	18.9656	A	G	0.110335	0.0253336	3.14e-06	13104	A	G	0.000168435	0.000589762	0.780001	462933
class.Deltaproteobacteria.id.3087	rs2838334	21	45064961	0.00134839	20.4774	G	A	0.0561722	0.0124124	5.45e-06	15168	G	A	0.000325027	0.000313165	0.3	462933
class.Deltaproteobacteria.id.3087	rs3935584	2	233929283	0.0013489	20.4824	C	T	-0.0523485	0.011566	7.5e-06	15166	C	T	-0.000201001	0.00029409	0.49	462933
class.Deltaproteobacteria.id.3087	rs4506934	17	2856662	0.00143646	21.6627	C	T	-0.0936514	0.02012	3.59e-06	15061	C	T	-0.000357214	0.000478909	0.46	462933
class.Deltaproteobacteria.id.3087	rs55744759	8	57867671	0.00137297	20.851	A	G	-0.0779693	0.0170738	7.31e-06	15168	A	G	-0.000136522	0.000453031	0.760001	462933
class.Deltaproteobacteria.id.3087	rs6058181	20	33694801	0.00163672	24.7518	C	T	0.0825716	0.0165958	3.4e-07	15100	C	T	0.00245437	0.000448646	4.49997e-08	462933
class.Deltaproteobacteria.id.3087	rs62020470	15	96161065	0.0013484	20.4774	A	G	-0.0585411	0.0129358	4.85e-06	15168	A	G	-0.000378337	0.000323612	0.24	462933
class.Deltaproteobacteria.id.3087	rs9928243	16	71541641	0.00137759	20.9199	C	A	-0.0538457	0.0117718	5.02e-06	15167	C	A	-0.000371546	0.000296513	0.21	462933
class.Erysipelotrichia.id.2147	rs1074800	5	3002546	0.00114877	20.4567	A	G	0.0492438	0.010887	6.15e-06	17789	A	G	-0.000736017	0.000306305	0.016	462933
class.Erysipelotrichia.id.2147	rs10781552	10	133897233	0.00127068	22.6304	C	T	-0.0552212	0.0116074	2.33e-06	17789	C	T	0.000101048	0.000315639	0.75	462933
class.Erysipelotrichia.id.2147	rs17530232	13	40385457	0.00126433	21.0397	A	G	0.10305	0.0224648	2.79e-06	16622	A	G	-0.000189722	0.000584126	0.75	462933
class.Erysipelotrichia.id.2147	rs1884466	1	64139196	0.00108423	19.7576	C	T	-0.0475363	0.0106939	9.53e-06	18205	C	T	-0.00042722	0.000300899	0.16	462933
class.Erysipelotrichia.id.2147	rs2300774	3	195793712	0.00132092	24.0911	G	A	0.0524152	0.0106784	8.95e-07	18216	G	A	3.90107e-05	0.00029914	0.9	462933
class.Erysipelotrichia.id.2147	rs290833	1	97457427	0.0011198	19.9402	T	G	-0.0497374	0.0111376	8.03e-06	17789	T	G	-0.000111058	0.000304949	0.719999	462933
class.Erysipelotrichia.id.2147	rs35161940	17	70327224	0.00126771	23.1157	T	C	-0.0806041	0.0167641	1.85e-06	18213	T	C	0.000187176	0.000458185	0.68	462933
class.Erysipelotrichia.id.2147	rs4078432	14	48997206	0.00116359	20.7209	C	T	-0.0608929	0.0133764	4.23e-06	17789	C	T	-0.000256182	0.000380381	0.5	462933
class.Erysipelotrichia.id.2147	rs56970041	14	80357610	0.001063	19.3832	T	G	0.0724144	0.0164471	5.4e-06	18217	T	G	0.000959405	0.000471595	0.0420001	462933
class.Erysipelotrichia.id.2147	rs62504403	8	38803551	0.00166794	28.3673	C	T	0.0681159	0.0127883	1.12e-07	16981	C	T	-0.000268489	0.000339791	0.43	462933
class.Erysipelotrichia.id.2147	rs7234058	18	5830507	0.00140515	23.741	T	C	-0.0945759	0.0194091	9.12e-07	16874	T	C	0.000274015	0.000485182	0.57	462933
class.Erysipelotrichia.id.2147	rs7826267	8	2954952	0.00100859	17.753	T	G	-0.0839071	0.0199131	9.28e-06	17586	T	G	-0.000100006	0.000582505	0.86	462933
class.Erysipelotrichia.id.2147	rs8003149	14	56156504	0.00116526	21.2454	C	T	0.0538798	0.0116888	4.08e-06	18213	C	T	0.000275077	0.000325422	0.4	462933
class.Gammaproteobacteria.id.3303	rs11181912	12	43572952	0.00148168	23.7643	G	A	-0.0579153	0.0118796	9.95e-07	16017	G	A	-0.000403818	0.00031101	0.19	462933
class.Gammaproteobacteria.id.3303	rs12404135	1	186502694	0.00137248	20.9302	A	G	-0.0788843	0.0172415	8.89e-06	15231	A	G	-0.00038912	0.000440605	0.38	462933
class.Gammaproteobacteria.id.3303	rs2234691	10	48385682	0.00122779	19.6799	T	C	0.0762905	0.0171962	8.39e-06	16011	T	C	0.000129548	0.000453966	0.780001	462933
class.Gammaproteobacteria.id.3303	rs6469506	8	115123937	0.00135001	21.6578	T	A	0.0541424	0.0116333	3.29e-06	16023	T	A	0.000238621	0.000298049	0.42	462933
class.Gammaproteobacteria.id.3303	rs6706173	2	167986992	0.00160328	25.7225	A	C	0.074251	0.0146392	1.99e-07	16020	A	C	0.00015152	0.000410515	0.709999	462933
class.Gammaproteobacteria.id.3303	rs75101789	3	18615903	0.00124672	19.9998	C	T	0.0729012	0.0163003	8.79e-06	16024	C	T	-7.17275e-05	0.00044157	0.87	462933
class.Gammaproteobacteria.id.3303	rs79795896	18	48185248	0.00270228	20.5253	A	G	-0.15921	0.0351373	7.92e-06	7577	A	G	0.0012301	0.000679936	0.0700003	462933
class.Gammaproteobacteria.id.3303	rs9494710	6	137612554	0.00131855	20.6599	C	T	-0.0549673	0.0120924	4.55e-06	15650	C	T	0.000340307	0.000301089	0.26	462933
class.Gammaproteobacteria.id.3303	rs9973122	18	75633634	0.00132395	20.7447	T	A	0.0740614	0.0162596	6.77e-06	15650	T	A	0.000459082	0.000426702	0.28	462933
class.Lentisphaeria.id.2250	rs1002941	15	101242690	0.00425588	20.2249	G	A	0.105025	0.0233484	8.15e-06	4734	G	A	-0.000213513	0.000326158	0.51	462933
class.Lentisphaeria.id.2250	rs11770843	7	146795379	0.00459233	21.6974	C	T	0.109431	0.0234879	1.91e-06	4705	C	T	0.000414027	0.000325693	0.2	462933
class.Lentisphaeria.id.2250	rs17114848	15	25162535	0.004641	22.0636	G	A	0.152377	0.0324332	4.06e-06	4734	G	A	9.70079e-05	0.000449618	0.83	462933
class.Lentisphaeria.id.2250	rs2031282	13	20687179	0.00430972	20.4819	A	G	0.122369	0.0270329	4.38e-06	4734	A	G	-0.000233836	0.000410913	0.57	462933
class.Lentisphaeria.id.2250	rs2731834	5	94720245	0.00448751	21.3261	C	G	0.109438	0.023693	4.24e-06	4733	C	G	7.9495e-05	0.000331113	0.81	462933
class.Lentisphaeria.id.2250	rs2825714	21	21023966	0.00474471	22.559	A	G	-0.13741	0.0289246	1.72e-06	4734	A	G	0.000228121	0.000410779	0.58	462933
class.Lentisphaeria.id.2250	rs62570196	9	111086170	0.00647509	24.1792	C	T	-0.21635	0.0439866	1.08e-06	3712	C	T	0.000174198	0.000542553	0.75	462933
class.Lentisphaeria.id.2250	rs72640280	1	11943792	0.0053469	20.5027	A	G	0.220207	0.0486196	5.18e-06	3816	A	G	0.00114734	0.000626468	0.0669993	462933
class.Lentisphaeria.id.2250	rs73113483	3	6223568	0.00435905	20.6473	T	A	-0.131217	0.0288713	8.66e-06	4718	T	A	0.000686359	0.000434833	0.11	462933
class.Lentisphaeria.id.2250	rs77599476	20	61394262	0.00614212	22.9899	A	G	0.230292	0.0480168	1.86e-06	3722	A	G	-0.000346813	0.000640861	0.59	462933
class.Melainabacteria.id.1589	rs10148250	14	107061448	0.00362995	19.859	G	A	0.0861928	0.0193381	8.67e-06	5453	G	A	2.108e-05	0.000293162	0.94	462933
class.Melainabacteria.id.1589	rs10738747	9	26184578	0.00330551	19.5075	G	A	0.0814624	0.0184409	9.96e-06	5884	G	A	-0.000253047	0.000292187	0.39	462933
class.Melainabacteria.id.1589	rs11150282	16	80493705	0.0042785	25.227	T	C	0.0989488	0.0196972	6.03e-07	5873	T	C	0.000113219	0.000314074	0.719999	462933
class.Melainabacteria.id.1589	rs113884518	9	24648997	0.00456503	20.3617	T	C	-0.205352	0.0454982	8.06e-06	4442	T	C	-0.000468265	0.000627536	0.46	462933
class.Melainabacteria.id.1589	rs1221147	9	122046549	0.00341217	19.742	T	A	0.123968	0.0278958	7.11e-06	5768	T	A	0.000210487	0.000438432	0.630001	462933
class.Melainabacteria.id.1589	rs16851659	1	230523039	0.0039111	23.0954	G	C	-0.0896103	0.0186432	1.27e-06	5884	G	C	0.000128205	0.000293631	0.66	462933
class.Melainabacteria.id.1589	rs28678345	17	53906328	0.00479265	20.8088	T	C	0.214848	0.0470878	6.69e-06	4323	T	C	0.000452971	0.000674135	0.5	462933
class.Melainabacteria.id.1589	rs367480	11	2937631	0.00344025	20.3157	G	A	-0.083758	0.0185796	8.2e-06	5887	G	A	-0.000172919	0.000295359	0.56	462933
class.Melainabacteria.id.1589	rs4129395	9	115975389	0.00396586	23.432	G	A	0.0896187	0.0185106	1.48e-06	5887	G	A	2.78693e-05	0.000293059	0.92	462933
class.Melainabacteria.id.1589	rs73074665	7	20010624	0.00377741	21.8252	A	T	0.166216	0.0355728	2.87e-06	5758	A	T	-4.02429e-06	0.000560383	0.99	462933
class.Melainabacteria.id.1589	rs789069	18	1008278	0.00331109	19.5239	A	C	-0.103539	0.0234287	6.85e-06	5879	A	C	0.000338726	0.000388326	0.38	462933
class.Melainabacteria.id.1589	rs79790072	15	100747683	0.00523152	21.5883	T	C	0.226722	0.0487841	3.29e-06	4107	T	C	0.00149381	0.000646096	0.021	462933
class.Melainabacteria.id.1589	rs9864379	3	14306949	0.00513394	29.8015	T	C	-0.159735	0.0292553	5.36e-08	5777	T	C	-0.000383305	0.000470993	0.42	462933
class.Methanobacteria.id.119	rs10202904	2	125440268	0.00719054	26.747	T	G	-0.121754	0.0235357	3.01e-07	3695	T	G	0.000116727	0.000295034	0.69	462933
class.Methanobacteria.id.119	rs10424197	19	46439321	0.00543557	20.1997	G	A	-0.111274	0.0247517	9.28e-06	3698	G	A	-5.23684e-05	0.000308725	0.87	462933
class.Methanobacteria.id.119	rs11018665	11	89349287	0.00532506	19.7868	A	T	0.111465	0.0250516	6.52e-06	3698	A	T	-0.000501203	0.000304692	0.1	462933
class.Methanobacteria.id.119	rs12825290	12	43701132	0.00610007	19.2841	C	G	-0.216781	0.0493496	6.08e-06	3144	C	G	-0.000520591	0.000589714	0.38	462933
class.Methanobacteria.id.119	rs4257531	3	2086167	0.00638397	20.303	G	A	0.164498	0.0364959	7.44e-06	3162	G	A	-6.25921e-05	0.000439732	0.89	462933
class.Methanobacteria.id.119	rs56131665	5	178160975	0.00575311	20.6574	G	A	0.178661	0.039298	6.18e-06	3572	G	A	-0.000127454	0.000490664	0.8	462933
class.Methanobacteria.id.119	rs62241835	3	15013348	0.00695183	23.6687	G	T	-0.203385	0.0417931	1.63e-06	3383	G	T	0.000105215	0.000491563	0.83	462933
class.Methanobacteria.id.119	rs6508769	19	28827760	0.00594705	19.8444	T	C	0.153519	0.0344519	8.23e-06	3319	T	C	-0.000150983	0.000405074	0.709999	462933
class.Methanobacteria.id.119	rs73068003	7	10773932	0.0054432	20.1953	G	T	-0.15814	0.0351803	8.45e-06	3692	G	T	6.05722e-05	0.000436152	0.89	462933
class.Methanobacteria.id.119	rs73457410	13	41956181	0.0069034	24.3021	A	G	0.21534	0.0436695	1.41e-06	3498	A	G	-0.000215109	0.000543121	0.69	462933
class.Methanobacteria.id.119	rs75208022	12	21338861	0.00673465	21.7038	C	T	-0.227245	0.048763	5.92e-06	3203	C	T	0.000416168	0.000567842	0.46	462933
class.Methanobacteria.id.119	rs894996	4	104418307	0.00647634	23.3364	C	A	0.216999	0.0449076	1.88e-06	3582	C	A	0.000692575	0.000546328	0.2	462933
class.Mollicutes.id.3920	rs10108398	8	59440824	0.00227797	24.9551	G	A	0.0769142	0.0153953	1.09e-06	10932	G	A	0.000221999	0.000327575	0.5	462933
class.Mollicutes.id.3920	rs11890098	2	157532549	0.00206304	23.5466	A	G	0.074438	0.0153389	9.57e-07	11392	A	G	-0.000117672	0.000340781	0.73	462933
class.Mollicutes.id.3920	rs12566890	1	61850864	0.00168358	19.1729	T	G	-0.101147	0.0230978	3.65e-06	11371	T	G	0.000653188	0.000548908	0.23	462933
class.Mollicutes.id.3920	rs17214486	14	97159674	0.00177285	20.2198	C	A	0.06099	0.0135623	6.61e-06	11387	C	A	-0.000189018	0.000300174	0.53	462933
class.Mollicutes.id.3920	rs2464826	7	79490250	0.0018038	19.8705	A	C	0.0944239	0.0211806	8.4e-06	10998	A	C	0.000466534	0.000453492	0.3	462933
class.Mollicutes.id.3920	rs28537087	15	95309676	0.00166669	18.9986	G	A	0.0820873	0.0188312	8.07e-06	11382	G	A	0.000442041	0.000438347	0.31	462933
class.Mollicutes.id.3920	rs3768491	1	109965986	0.00189381	20.8715	A	G	-0.0681052	0.0149061	4.23e-06	11002	A	G	-0.000299042	0.000322968	0.35	462933
class.Mollicutes.id.3920	rs4885016	13	73170489	0.00178493	20.3596	T	C	-0.0819606	0.0181628	7.27e-06	11388	T	C	0.000213728	0.000407822	0.6	462933
class.Mollicutes.id.3920	rs6043847	20	16259524	0.00191677	21.3707	T	C	-0.114937	0.0248606	4.55e-06	11130	T	C	0.00136639	0.000607661	0.025	462933
class.Mollicutes.id.3920	rs72901605	11	47103877	0.00211771	22.3341	T	C	-0.0841852	0.0178119	3.26e-06	10526	T	C	0.000322184	0.000370295	0.38	462933
class.Mollicutes.id.3920	rs74603314	14	46519718	0.00506947	22.9136	T	C	0.221639	0.0462918	1.56e-06	4499	T	C	-0.00126656	0.000696244	0.0690001	462933
class.Mollicutes.id.3920	rs78169027	11	108439087	0.00197144	20.8201	A	G	-0.108283	0.0237289	5.88e-06	10542	A	G	3.03922e-05	0.000502111	0.95	462933
class.Negativicutes.id.2164	rs1135612	7	75609677	0.00108676	19.7592	G	A	0.0529785	0.0119177	9.26e-06	18164	G	A	0.00069184	0.000333844	0.0379997	462933
class.Negativicutes.id.2164	rs13086907	3	142135117	0.00123898	22.5291	G	A	0.0625312	0.0131735	1.95e-06	18163	G	A	-0.000267705	0.000353748	0.450001	462933
class.Negativicutes.id.2164	rs1447205	8	41231597	0.00117988	21.4554	G	C	-0.0502053	0.0108382	2.93e-06	18165	G	C	-0.000117882	0.000298744	0.69	462933
class.Negativicutes.id.2164	rs1643968	5	165266628	0.00139261	25.3362	T	C	-0.0565284	0.0112298	4.15e-07	18170	T	C	0.000133103	0.000318422	0.68	462933
class.Negativicutes.id.2164	rs1649999	10	80086072	0.00112128	20.2439	A	G	0.0748989	0.0166458	7.58e-06	18036	A	G	0.000668325	0.000456548	0.14	462933
class.Negativicutes.id.2164	rs2834062	21	34377485	0.00110986	20.1874	A	G	0.0489057	0.0108842	8.44e-06	18171	A	G	-8.13728e-05	0.000313353	0.8	462933
class.Negativicutes.id.2164	rs4463806	10	115597993	0.000972681	17.6791	T	C	-0.0543966	0.0129365	7.81e-06	18160	T	C	8.98308e-05	0.000345758	0.8	462933
class.Negativicutes.id.2164	rs4722181	7	22817571	0.0012346	22.4493	T	G	0.0501306	0.0105798	2e-06	18163	T	G	-0.000348806	0.000291514	0.23	462933
class.Negativicutes.id.2164	rs60274479	16	21249925	0.00137132	24.1794	T	C	-0.0659623	0.0134137	1.16e-06	17610	T	C	-0.000223888	0.000375344	0.55	462933
class.Negativicutes.id.2164	rs61249479	9	124912908	0.00116768	21.2333	A	C	0.0777075	0.0168628	2.95e-06	18165	A	C	-0.000921691	0.000514789	0.0729995	462933
class.Negativicutes.id.2164	rs71405394	15	101245088	0.00162343	22.5358	G	A	-0.114178	0.02405	2.17e-06	13861	G	A	2.07153e-05	0.00058109	0.97	462933
class.Negativicutes.id.2164	rs73232831	4	17413426	0.00247119	23.2372	G	A	-0.151829	0.0314932	1.87e-06	9382	G	A	-0.000468169	0.000628411	0.46	462933
class.Negativicutes.id.2164	rs9423647	10	5579818	0.00113436	20.6257	G	A	0.047817	0.0105282	6.06e-06	18164	G	A	-0.000104086	0.000291623	0.719999	462933
class.Verrucomicrobiae.id.4029	rs11184341	1	105422565	0.00178625	21.2264	G	C	0.0655342	0.0142231	4.13e-06	11864	G	C	0.000634765	0.000327208	0.0519996	462933
class.Verrucomicrobiae.id.4029	rs111862613	12	130309670	0.00182539	21.248	T	C	0.090699	0.0196746	3.74e-06	11621	T	C	-0.0005328	0.000393352	0.18	462933
class.Verrucomicrobiae.id.4029	rs117107102	18	49473635	0.00450094	22.4844	A	G	0.204683	0.0431573	2.92e-06	4975	A	G	-0.000409895	0.000734515	0.58	462933
class.Verrucomicrobiae.id.4029	rs11729256	4	95027272	0.00209725	24.9235	T	C	0.0749798	0.0150177	6.73e-07	11861	T	C	-0.000165957	0.000332862	0.62	462933
class.Verrucomicrobiae.id.4029	rs12908520	15	97570657	0.00187966	22.3366	G	A	0.0618926	0.0130946	2.17e-06	11863	G	A	-1.21615e-05	0.000293999	0.97	462933
class.Verrucomicrobiae.id.4029	rs2602429	16	81063149	0.00195194	22.8589	C	T	0.0746844	0.0156194	2.58e-06	11690	C	T	-0.000115881	0.00035495	0.74	462933
class.Verrucomicrobiae.id.4029	rs4242783	10	5064327	0.00185979	21.7777	G	A	0.0689292	0.0147693	2.64e-06	11690	G	A	-0.00032449	0.000331886	0.33	462933
class.Verrucomicrobiae.id.4029	rs4936098	11	130280667	0.00191785	22.7817	A	G	0.0648843	0.0135928	1.12e-06	11858	A	G	-7.86344e-05	0.000302425	0.79	462933
class.Verrucomicrobiae.id.4029	rs61779207	1	41074472	0.00175963	20.4283	G	A	-0.0758309	0.0167762	6.72e-06	11591	G	A	-0.000501779	0.00037875	0.19	462933
class.Verrucomicrobiae.id.4029	rs74542928	4	100544188	0.00200272	22.5036	T	C	0.112164	0.0236422	1.63e-06	11216	T	C	0.000354396	0.000487268	0.47	462933
class.Verrucomicrobiae.id.4029	rs9349825	6	56341481	0.0019273	22.8942	A	G	-0.0704036	0.0147128	2.54e-06	11858	A	G	0.000190809	0.000331105	0.56	462933
class.Verrucomicrobiae.id.4029	rs941682	20	31867840	0.00163086	19.287	G	A	-0.0631436	0.0143767	9.61e-06	11809	G	A	-0.000828098	0.000326353	0.0109999	462933
family.Acidaminococcaceae.id.2166	rs262812	6	158647999	0.0017585	21.31	T	C	-0.065675	0.0142257	3.25e-06	12099	T	C	-0.000300261	0.000331454	0.36	462933
family.Acidaminococcaceae.id.2166	rs2933324	9	107117653	0.00177848	22.3116	A	G	-0.0662557	0.0140257	2.24e-06	12525	A	G	-0.000300221	0.000324705	0.36	462933
family.Acidaminococcaceae.id.2166	rs45497800	20	61991833	0.00185014	20.9713	T	C	-0.117863	0.0257351	5.86e-06	11316	T	C	-0.000281844	0.00053127	0.6	462933
family.Acidaminococcaceae.id.2166	rs6427992	1	203102563	0.00168458	21.135	G	C	-0.0595857	0.01296	4.24e-06	12527	G	C	8.93627e-05	0.000296619	0.760001	462933
family.Acidaminococcaceae.id.2166	rs6589457	11	114701288	0.00304147	22.5267	A	G	0.165911	0.0349516	2.32e-06	7386	A	G	-0.000214428	0.000653037	0.74	462933
family.Acidaminococcaceae.id.2166	rs6923842	6	5723181	0.00185644	22.1364	T	C	-0.0796106	0.0169192	2.21e-06	11904	T	C	-0.000300349	0.000373261	0.42	462933
family.Acidaminococcaceae.id.2166	rs74540770	3	186553389	0.00188418	20.0175	G	A	-0.108969	0.0243533	7.09e-06	10606	G	A	-0.000442227	0.000522167	0.4	462933
family.Acidaminococcaceae.id.2166	rs78702810	3	18462531	0.00246864	19.7733	T	C	-0.143755	0.0323244	9.16e-06	7992	T	C	-0.000149978	0.000721172	0.84	462933
family.Actinomycetaceae.id.421	rs2889192	9	76394568	0.00267945	20.7087	G	T	0.0887537	0.0195009	3.64e-06	7710	G	T	-8.03352e-05	0.000346573	0.82	462933
family.Actinomycetaceae.id.421	rs34583783	6	67207371	0.00283627	21.9242	G	T	0.123756	0.026427	5.48e-06	7710	G	T	6.12609e-05	0.000465516	0.9	462933
family.Actinomycetaceae.id.421	rs35011108	6	133007480	0.00630729	23.0281	A	G	0.241826	0.0503796	1.83e-06	3630	A	G	0.000457852	0.00068104	0.5	462933
family.Actinomycetaceae.id.421	rs4073240	6	169224781	0.0026654	20.5998	G	A	0.0747546	0.0164684	6.05e-06	7710	G	A	0.000434903	0.000299239	0.15	462933
family.Actinomycetaceae.id.421	rs58484246	15	29850991	0.00262561	20.2915	T	C	0.0761407	0.0169007	6.12e-06	7710	T	C	-9.29882e-05	0.000305858	0.760001	462933
family.Alcaligenaceae.id.2875	rs112135816	9	82485327	0.0013113	20.4083	T	G	-0.0775052	0.0171554	5.28e-06	15545	T	G	0.000145298	0.000450121	0.75	462933
family.Alcaligenaceae.id.2875	rs112159068	6	138305038	0.00187368	21.8768	A	T	0.131484	0.0281089	3.56e-06	11656	A	T	0.000618676	0.000656058	0.35	462933
family.Alcaligenaceae.id.2875	rs1153990	5	104233461	0.00124488	20.9475	A	G	-0.058727	0.0128306	5.97e-06	16808	A	G	0.000101869	0.000344352	0.77	462933
family.Alcaligenaceae.id.2875	rs147968	16	85945839	0.00116969	19.6831	C	T	0.0489475	0.0110321	9.13e-06	16810	C	T	-0.000196447	0.000294967	0.51	462933
family.Alcaligenaceae.id.2875	rs17000015	4	75867283	0.00144013	23.6161	A	T	-0.0609257	0.0125363	1.13e-06	16377	A	T	0.000271035	0.000339152	0.42	462933
family.Alcaligenaceae.id.2875	rs2367850	3	193456274	0.00139109	22.8108	G	C	0.0629104	0.0131712	1.85e-06	16377	G	C	-0.000334854	0.000375654	0.37	462933
family.Alcaligenaceae.id.2875	rs28480294	15	71522509	0.00122172	20.0301	T	C	-0.0516967	0.0115503	6.61e-06	16377	T	C	0.000578332	0.000306235	0.0589997	462933
family.Alcaligenaceae.id.2875	rs4033856	4	45642485	0.0014998	23.4635	C	T	0.081834	0.0168931	1.03e-06	15623	C	T	8.62757e-05	0.000452564	0.85	462933
family.Alcaligenaceae.id.2875	rs62191117	2	239900775	0.00156878	26.2178	A	G	0.0684302	0.0133636	2.76e-07	16688	A	G	5.11702e-05	0.000359171	0.89	462933
family.Alcaligenaceae.id.2875	rs62395635	5	173497796	0.00145009	21.4926	T	C	0.110583	0.0238514	3.35e-06	14802	T	C	0.000124458	0.000595225	0.83	462933
family.Alcaligenaceae.id.2875	rs67737557	20	29836081	0.0014906	23.6971	C	G	0.0738409	0.0151678	1.04e-06	15876	C	G	0.00017927	0.000392029	0.649999	462933
family.Alcaligenaceae.id.2875	rs6969323	7	104214487	0.00125523	21.1244	A	C	-0.0593564	0.0129137	3.89e-06	16810	A	C	0.000423224	0.000342272	0.22	462933
family.Alcaligenaceae.id.2875	rs7302582	12	1396151	0.00138894	21.0175	G	C	-0.106817	0.023298	3.34e-06	15113	G	C	-0.000723128	0.000638545	0.26	462933
family.Alcaligenaceae.id.2875	rs74776516	11	20763367	0.00134912	19.5887	T	G	-0.0944052	0.0213287	6.85e-06	14502	T	G	-0.000348865	0.000548661	0.52	462933
family.Alcaligenaceae.id.2875	rs7638039	3	70588939	0.00132601	22.2919	T	C	0.0603335	0.0127779	2.7e-06	16791	T	C	0.000312741	0.000338754	0.36	462933
family.Alcaligenaceae.id.2875	rs9537886	13	58545246	0.0015804	26.6007	A	C	-0.0570888	0.0110683	2.35e-07	16807	A	C	8.65915e-05	0.000292247	0.77	462933
family.Alcaligenaceae.id.2875	rs9964679	18	26569901	0.00127331	21.429	A	G	0.0537051	0.0116008	4.47e-06	16810	A	G	-5.34038e-05	0.00032093	0.87	462933
family.Bacteroidaceae.id.917	rs11585893	1	10644351	0.00141067	25.1722	A	G	-0.0740746	0.0147633	1.8e-06	17821	A	G	-0.000150815	0.000422636	0.719999	462933
family.Bacteroidaceae.id.917	rs13207588	6	41519430	0.00114879	20.3627	A	G	-0.059205	0.0131195	7.49e-06	17707	A	G	0.000507296	0.000357162	0.16	462933
family.Bacteroidaceae.id.917	rs1340391	1	102960989	0.00109376	20.0377	T	C	-0.0592004	0.0132244	6.73e-06	18302	T	C	-0.000186975	0.000365732	0.61	462933
family.Bacteroidaceae.id.917	rs17619981	19	24342250	0.00140263	22.1913	T	G	0.0880978	0.0187002	2.69e-06	15801	T	G	0.000250001	0.000483885	0.61	462933
family.Bacteroidaceae.id.917	rs2023437	14	22045949	0.00124414	21.7771	T	C	-0.0782324	0.0167634	5.02e-06	17484	T	C	-0.000215083	0.000460735	0.64	462933
family.Bacteroidaceae.id.917	rs2366421	3	62019400	0.00110998	20.3319	T	A	-0.0528153	0.0117124	7.65e-06	18299	T	A	-0.000170034	0.000328739	0.6	462933
family.Bacteroidaceae.id.917	rs28757219	6	29143451	0.00155418	23.0859	T	A	0.0818398	0.0170319	1.29e-06	14833	T	A	0.000404528	0.000405628	0.32	462933
family.Bacteroidaceae.id.917	rs495004	9	112855426	0.00123421	21.8787	C	G	-0.0607475	0.0129865	3.42e-06	17707	C	G	0.000459417	0.000364422	0.21	462933
family.Bacteroidaceae.id.917	rs66474973	20	58605432	0.0014001	24.4001	G	T	0.0812515	0.0164479	6.81e-07	17405	G	T	-0.000726678	0.000449957	0.11	462933
family.Bacteroidaceae.id.917	rs66710942	3	77215327	0.00115709	20.642	C	T	0.0488038	0.0107412	5.86e-06	17821	C	T	0.000229244	0.000297626	0.44	462933
family.Bacteroidaceae.id.917	rs6795673	3	10593224	0.00142865	26.1803	C	T	0.0538565	0.0105251	3.38e-07	18301	C	T	2.89976e-05	0.000293208	0.92	462933
family.Bacteroidaceae.id.917	rs9507307	13	24910476	0.00120359	21.91	C	T	0.0604456	0.0129128	2.13e-06	18184	C	T	8.76212e-05	0.000368793	0.81	462933
family.BacteroidalesS24.7group.id.11173	rs10872669	6	151515172	0.00269787	19.9263	A	G	-0.123071	0.0275665	9.49e-06	7368	A	G	-0.000756552	0.000458119	0.0990011	462933
family.BacteroidalesS24.7group.id.11173	rs11135366	5	164763068	0.00263446	21.0019	C	G	0.0842142	0.0183739	8.78e-06	7953	C	G	-0.000424134	0.000326592	0.19	462933
family.BacteroidalesS24.7group.id.11173	rs12748533	1	242767252	0.0028361	22.5998	G	T	-0.0821108	0.0172701	2.59e-06	7948	G	T	0.000165544	0.000323277	0.61	462933
family.BacteroidalesS24.7group.id.11173	rs17043785	2	53139362	0.004922	25.7507	T	C	-0.176187	0.0347133	5.12e-07	5208	T	C	-5.54815e-05	0.00065961	0.93	462933
family.BacteroidalesS24.7group.id.11173	rs61508842	3	158653545	0.00266577	20.2445	T	C	0.122574	0.0272389	7.83e-06	7576	T	C	0.000615419	0.000479311	0.2	462933
family.BacteroidalesS24.7group.id.11173	rs6831034	4	149300138	0.00285927	21.7182	T	A	-0.0956546	0.0205228	6.1e-06	7576	T	A	0.000263419	0.0003699	0.48	462933
family.BacteroidalesS24.7group.id.11173	rs689695	15	47352866	0.00298027	23.7699	C	A	0.0814578	0.0167057	1.28e-06	7954	C	A	-0.000478929	0.000303693	0.11	462933
family.BacteroidalesS24.7group.id.11173	rs7217209	17	21205200	0.00260859	20.2512	C	T	0.0843019	0.0187308	8.43e-06	7745	C	T	-0.000225859	0.000395206	0.57	462933
family.BacteroidalesS24.7group.id.11173	rs738193	22	25943322	0.0033444	26.0933	T	C	0.0847328	0.0165856	3.82e-07	7778	T	C	0.000265399	0.000302072	0.38	462933
family.BacteroidalesS24.7group.id.11173	rs78609301	6	63236747	0.00246197	19.6234	A	G	-0.0867065	0.0195709	7.09e-06	7953	A	G	-0.000488667	0.000364564	0.18	462933
family.BacteroidalesS24.7group.id.11173	rs941000	7	90714667	0.00346994	27.0762	C	T	0.0850266	0.0163382	3.16e-07	7778	C	T	-0.000279188	0.000294679	0.34	462933
family.Bifidobacteriaceae.id.433	rs10496759	2	137603404	0.00130537	19.4912	G	C	0.0637133	0.0144305	8.8e-06	14914	G	C	0.000365837	0.000383096	0.34	462933
family.Bifidobacteriaceae.id.433	rs10831953	11	13098051	0.00126352	18.8668	G	A	0.0537537	0.0123746	9.95e-06	14915	G	A	0.000297856	0.000304823	0.33	462933
family.Bifidobacteriaceae.id.433	rs10841473	12	20378911	0.00151559	22.6347	G	C	-0.0613031	0.0128844	2.28e-06	14914	G	C	-0.000458684	0.000331323	0.17	462933
family.Bifidobacteriaceae.id.433	rs10857328	4	161211924	0.00132377	19.7676	T	A	0.0562	0.0126395	7.24e-06	14915	T	A	0.000324087	0.000317761	0.31	462933
family.Bifidobacteriaceae.id.433	rs12446429	16	898055	0.00128618	18.0374	T	C	0.0810099	0.019073	8.53e-06	14008	T	C	0.000371242	0.000483313	0.44	462933
family.Bifidobacteriaceae.id.433	rs13020688	2	192878532	0.00154457	22.8841	G	A	0.0584045	0.0122081	1.57e-06	14795	G	A	-0.00038333	0.000301279	0.2	462933
family.Bifidobacteriaceae.id.433	rs182549	2	136616754	0.0056913	85.3602	C	T	0.11707	0.0126703	5.94e-20	14915	C	T	-0.000826711	0.000328573	0.012	462933
family.Bifidobacteriaceae.id.433	rs4567981	2	49906864	0.00163465	24.2209	T	A	0.0577763	0.0117388	8.88e-07	14795	T	A	0.000574741	0.000296427	0.0530005	462933
family.Bifidobacteriaceae.id.433	rs4957061	5	521096	0.00160347	23.7582	T	C	0.0569873	0.0116907	1.15e-06	14795	T	C	0.000313773	0.000294692	0.29	462933
family.Bifidobacteriaceae.id.433	rs540489	17	72897722	0.00142475	20.9538	T	G	-0.0632518	0.013817	5.37e-06	14688	T	G	-0.000238527	0.000344868	0.49	462933
family.Bifidobacteriaceae.id.433	rs55888705	4	1517826	0.00132662	19.8088	A	G	0.053673	0.0120586	8.66e-06	14914	A	G	0.000131174	0.000302016	0.66	462933
family.Bifidobacteriaceae.id.433	rs677208	18	4304187	0.00130843	19.5382	G	C	0.0728589	0.0164821	6e-06	14915	G	C	-0.000309424	0.000430016	0.47	462933
family.Bifidobacteriaceae.id.433	rs6899771	6	97406220	0.00143719	20.3626	A	G	-0.0914312	0.0202604	7.28e-06	14150	A	G	0.000527385	0.000518314	0.31	462933
family.Bifidobacteriaceae.id.433	rs7174549	15	92463303	0.00131171	19.5872	C	T	0.0551726	0.0124655	6.87e-06	14915	C	T	0.00021621	0.000309866	0.49	462933
family.Bifidobacteriaceae.id.433	rs7322849	13	112859829	0.00202874	30.3161	T	C	0.110676	0.0200996	1.74e-08	14915	T	C	5.30802e-05	0.00063144	0.93	462933
family.Bifidobacteriaceae.id.433	rs73797465	5	142793467	0.0013806	20.4514	T	G	-0.0942612	0.0208421	4.85e-06	14795	T	G	-0.000705991	0.000592982	0.23	462933
family.Bifidobacteriaceae.id.433	rs76671854	5	169748189	0.001704	23.7619	C	G	-0.0892981	0.0183177	1.04e-06	13923	C	G	0.000380165	0.000440879	0.39	462933
family.Bifidobacteriaceae.id.433	rs857444	6	14617591	0.00141112	21.0723	C	T	0.0553965	0.0120669	3.82e-06	14914	C	T	-1.97391e-05	0.000305818	0.95	462933
family.Christensenellaceae.id.1866	rs117186816	11	123936128	0.00516792	22.379	G	A	-0.206476	0.0436362	6.52e-06	4310	G	A	-0.000858202	0.000711798	0.23	462933
family.Christensenellaceae.id.1866	rs12380890	9	38002256	0.00122115	20.5942	A	G	-0.0503972	0.0111047	5.78e-06	16846	A	G	-0.000194627	0.000294571	0.51	462933
family.Christensenellaceae.id.1866	rs12657403	5	3174785	0.00126951	20.6468	A	G	0.078108	0.0171887	5.59e-06	16245	A	G	-0.000237621	0.000454919	0.6	462933
family.Christensenellaceae.id.1866	rs4805124	19	35884202	0.00117966	19.8949	C	G	0.0486508	0.0109067	8.36e-06	16847	C	G	-0.000222216	0.00029211	0.450001	462933
family.Christensenellaceae.id.1866	rs62573205	9	137786999	0.00142669	24.0541	G	A	-0.0654804	0.0133503	1.49e-06	16838	G	A	-0.000933259	0.000366745	0.0109999	462933
family.Christensenellaceae.id.1866	rs7211194	17	13541941	0.00119616	19.6812	C	T	0.0492094	0.0110916	9.94e-06	16436	C	T	0.000160435	0.000292948	0.58	462933
family.Christensenellaceae.id.1866	rs72706624	9	15518852	0.00134037	19.9541	G	T	0.0882626	0.0197575	6.38e-06	14869	G	T	0.000842296	0.000491391	0.0870001	462933
family.Christensenellaceae.id.1866	rs77867022	7	120333701	0.00441031	17.8567	G	T	-0.160443	0.0379589	8.82e-06	4033	G	T	0.00135423	0.00075716	0.0739997	462933
family.Christensenellaceae.id.1866	rs870002	8	62220151	0.00117533	19.8217	C	T	0.0488951	0.0109817	6.54e-06	16847	C	T	-2.81418e-05	0.000293913	0.92	462933
family.Christensenellaceae.id.1866	rs892686	9	83043376	0.00126296	21.3015	A	G	0.0506107	0.0109651	4.12e-06	16847	A	G	-0.000138338	0.000293429	0.64	462933
family.Christensenellaceae.id.1866	rs9608766	22	29828040	0.00128295	20.7886	T	C	-0.0682134	0.01496	3.33e-06	16185	T	C	0.000582996	0.000389485	0.13	462933
family.Clostridiaceae1.id.1869	rs10875374	1	101804809	0.00141504	20.1943	C	T	-0.0536759	0.0119436	8.1e-06	14253	C	T	-0.00047534	0.000292244	0.1	462933
family.Clostridiaceae1.id.1869	rs12186080	3	132596627	0.00148699	21.2092	G	A	0.0748236	0.016246	5.34e-06	14244	G	A	0.000720443	0.000392476	0.0659994	462933
family.Clostridiaceae1.id.1869	rs12341505	9	136710881	0.00144543	20.6243	G	A	0.0814503	0.0179338	4.54e-06	14250	G	A	0.000278133	0.000419676	0.51	462933
family.Clostridiaceae1.id.1869	rs12490337	3	111482845	0.00142223	20.297	C	G	-0.0616944	0.013693	6.91e-06	14253	C	G	0.000110534	0.000341534	0.75	462933
family.Clostridiaceae1.id.1869	rs2795528	10	43270264	0.00333179	21.4248	G	A	-0.180969	0.0390911	3.81e-06	6411	G	A	0.000384079	0.000625425	0.54	462933
family.Clostridiaceae1.id.1869	rs2817172	1	3041519	0.00149663	20.665	C	T	0.0563367	0.012392	5.27e-06	13789	C	T	-5.45394e-05	0.000302479	0.86	462933
family.Clostridiaceae1.id.1869	rs4723021	7	30934659	0.0014109	19.3284	T	C	-0.106376	0.0241944	7.42e-06	13682	T	C	-4.23377e-05	0.000609455	0.94	462933
family.Clostridiaceae1.id.1869	rs550843	6	165722832	0.00133603	19.0399	T	C	-0.0734787	0.0168383	7.09e-06	14234	T	C	-0.00104721	0.00044707	0.0189998	462933
family.Clostridiaceae1.id.1869	rs56188186	16	87710690	0.00149598	19.8006	A	G	0.0967774	0.0217471	8.24e-06	13218	A	G	0.000144214	0.000520039	0.780001	462933
family.Clostridiaceae1.id.1869	rs62397761	6	48093014	0.00143274	20.4402	A	G	0.0615805	0.0136198	9.08e-06	14248	A	G	-0.000471117	0.000329011	0.15	462933
family.Clostridiaceae1.id.1869	rs881532	22	47806774	0.00140577	20.0576	A	G	-0.0533035	0.0119011	7.9e-06	14250	A	G	0.000296666	0.000290936	0.31	462933
family.ClostridialesvadinBB60group.id.11286	rs10517600	4	155632958	0.00192177	20.2367	T	G	0.0626993	0.0139364	6.83e-06	10512	T	G	-0.000418922	0.000291513	0.15	462933
family.ClostridialesvadinBB60group.id.11286	rs10904722	10	6714424	0.0019826	20.8785	C	T	-0.0672314	0.0147123	5.05e-06	10512	C	T	-7.86836e-05	0.000312956	0.8	462933
family.ClostridialesvadinBB60group.id.11286	rs118104867	8	123977538	0.00539382	22.1966	C	T	0.214464	0.0455098	3.44e-06	4095	C	T	0.000474959	0.000668121	0.48	462933
family.ClostridialesvadinBB60group.id.11286	rs13409132	2	205616346	0.00371773	22.0575	A	G	-0.165419	0.0352154	4.37e-06	5913	A	G	-0.00125815	0.000646538	0.0519996	462933
family.ClostridialesvadinBB60group.id.11286	rs17121075	14	85856796	0.00189407	19.9444	G	A	0.0769254	0.0172234	7.91e-06	10512	G	A	-0.000585667	0.000377277	0.12	462933
family.ClostridialesvadinBB60group.id.11286	rs2191834	2	229942951	0.00208845	21.9935	G	T	0.0746375	0.0159136	2.5e-06	10511	G	T	8.64486e-05	0.00033391	0.8	462933
family.ClostridialesvadinBB60group.id.11286	rs28691777	17	58149405	0.00257988	26.375	C	T	0.137134	0.0266996	6.96e-07	10199	C	T	0.000317594	0.000587427	0.59	462933
family.ClostridialesvadinBB60group.id.11286	rs34088226	5	4308946	0.00196662	19.1414	A	G	-0.117807	0.026924	7.66e-06	9716	A	G	-0.000827793	0.00057954	0.15	462933
family.ClostridialesvadinBB60group.id.11286	rs55682560	15	87392290	0.00275079	25.3247	C	T	-0.131519	0.0261319	4.97e-07	9183	C	T	-0.00077507	0.000544763	0.15	462933
family.ClostridialesvadinBB60group.id.11286	rs6588624	1	56849539	0.00218181	22.981	G	A	-0.0662317	0.0138147	1.79e-06	10512	G	A	0.000397623	0.00029285	0.17	462933
family.ClostridialesvadinBB60group.id.11286	rs66714985	8	3305122	0.00203599	21.442	A	C	0.116908	0.0252447	4.85e-06	10512	A	C	-0.000889999	0.000566079	0.12	462933
family.ClostridialesvadinBB60group.id.11286	rs6755871	2	202450739	0.00185445	19.5042	C	G	-0.0613825	0.0138976	9.33e-06	10500	C	G	0.000608409	0.000293014	0.0379997	462933
family.ClostridialesvadinBB60group.id.11286	rs7226487	18	74373125	0.00204595	21.5327	A	G	-0.0643682	0.0138701	3.58e-06	10505	A	G	0.000531168	0.000293393	0.0700003	462933
family.ClostridialesvadinBB60group.id.11286	rs7538034	1	71391694	0.00214733	22.419	T	G	-0.078598	0.0165982	2.37e-06	10420	T	G	-0.000394296	0.000352388	0.26	462933
family.ClostridialesvadinBB60group.id.11286	rs7725895	5	142244898	0.00221916	23.3753	A	G	-0.116224	0.0240367	3.94e-06	10512	A	G	-0.00131406	0.000589264	0.0259998	462933
family.ClostridialesvadinBB60group.id.11286	rs989682	3	15564453	0.00201121	20.4086	A	G	0.070194	0.0155364	6.85e-06	10129	A	G	-0.000610154	0.000318129	0.0549997	462933
family.ClostridialesvadinBB60group.id.11286	rs9979874	21	38612024	0.00227682	23.9703	G	C	-0.0738925	0.0150911	1.05e-06	10506	G	C	-0.000500705	0.000326974	0.13	462933
family.Coriobacteriaceae.id.811	rs11073596	15	86433579	0.00113478	19.9096	T	G	0.0510212	0.0114339	8.14e-06	17527	T	G	9.93674e-06	0.000318313	0.98	462933
family.Coriobacteriaceae.id.811	rs11250875	10	1922731	0.00121534	21.5232	T	C	0.06075	0.0130939	4.83e-06	17690	T	C	-0.000188162	0.000361659	0.6	462933
family.Coriobacteriaceae.id.811	rs11656361	17	8121332	0.0011624	19.3915	A	C	0.0773006	0.017553	8.02e-06	16665	A	C	0.000230896	0.00046297	0.62	462933
family.Coriobacteriaceae.id.811	rs12974142	19	52895166	0.00113949	19.8623	G	A	0.0789796	0.0177205	8.51e-06	17413	G	A	-0.000228959	0.000473566	0.630001	462933
family.Coriobacteriaceae.id.811	rs13307134	7	105084680	0.00114388	20.0695	C	T	0.0565686	0.0126265	7.8e-06	17527	C	T	0.000139539	0.000343056	0.68	462933
family.Coriobacteriaceae.id.811	rs1397793	5	90471451	0.00112166	19.6792	G	A	-0.0498855	0.0112446	9.77e-06	17527	G	A	-8.9955e-05	0.000319119	0.780001	462933
family.Coriobacteriaceae.id.811	rs1816223	12	11494021	0.00116623	20.65	A	G	-0.0586265	0.0129006	4.84e-06	17688	A	G	0.000530479	0.000361218	0.14	462933
family.Coriobacteriaceae.id.811	rs240104	1	176571431	0.0012858	22.6271	T	C	-0.0603429	0.0126849	1.52e-06	17577	T	C	-0.00013676	0.000352259	0.7	462933
family.Coriobacteriaceae.id.811	rs2442778	3	11654412	0.00150249	20.2689	G	A	-0.116408	0.0258545	9.03e-06	13472	G	A	-0.000405153	0.000681747	0.55	462933
family.Coriobacteriaceae.id.811	rs3025411	9	136512906	0.00124698	19.5632	A	G	0.0926543	0.0209468	8.27e-06	15671	A	G	-1.79815e-05	0.000541813	0.97	462933
family.Coriobacteriaceae.id.811	rs34739816	17	37376685	0.00129972	21.5917	G	T	0.0965017	0.0207666	3.88e-06	16593	G	T	0.000222633	0.000556845	0.69	462933
family.Coriobacteriaceae.id.811	rs62448869	7	24464799	0.00113362	19.8892	T	A	-0.0486059	0.0108982	7.87e-06	17527	T	A	0.000444818	0.000294565	0.13	462933
family.Coriobacteriaceae.id.811	rs67561917	20	62072077	0.00123808	21.4838	A	G	-0.0714367	0.0154113	5.39e-06	17333	A	G	-0.000120726	0.000428631	0.780001	462933
family.Coriobacteriaceae.id.811	rs719099	10	65799217	0.00140904	24.954	A	G	0.0778402	0.0155815	5.43e-07	17687	A	G	-0.000331102	0.000446844	0.46	462933
family.Coriobacteriaceae.id.811	rs76779974	5	125460084	0.0012364	20.3231	C	G	0.0774888	0.0171877	5.63e-06	16419	C	G	7.03959e-05	0.000441957	0.87	462933
family.Coriobacteriaceae.id.811	rs80046645	5	459415	0.00642656	20.7109	C	G	0.25584	0.0561995	4.66e-06	3204	C	G	1.08679e-05	0.0006467	0.99	462933
family.Coriobacteriaceae.id.811	rs8010111	14	39660509	0.00126919	20.3253	G	A	-0.103377	0.0229286	6.9e-06	15996	G	A	0.000323539	0.000574492	0.57	462933
family.Desulfovibrionaceae.id.3169	rs112381107	9	15269705	0.00478262	21.3994	C	T	0.211435	0.0456962	2.82e-06	4455	C	T	-0.000665973	0.00067293	0.32	462933
family.Desulfovibrionaceae.id.3169	rs11599763	10	11855599	0.00147635	22.385	T	C	-0.0555931	0.0117493	2.5e-06	15142	T	C	3.62003e-05	0.000299581	0.9	462933
family.Desulfovibrionaceae.id.3169	rs16851319	1	203308383	0.0015547	23.553	G	C	-0.0732697	0.0150964	2.4e-06	15128	G	C	-0.000101942	0.000391335	0.79	462933
family.Desulfovibrionaceae.id.3169	rs17791387	9	81834426	0.00148092	22.3106	A	G	-0.0729251	0.0154381	2.1e-06	15045	A	G	-0.000474512	0.000378563	0.21	462933
family.Desulfovibrionaceae.id.3169	rs2692012	1	203991605	0.00154915	20.2913	A	G	0.114231	0.0253568	1.56e-06	13080	A	G	0.000168435	0.000589762	0.780001	462933
family.Desulfovibrionaceae.id.3169	rs2838334	21	45064961	0.0013953	21.1544	G	A	0.0571419	0.012423	3.82e-06	15142	G	A	0.000325027	0.000313165	0.3	462933
family.Desulfovibrionaceae.id.3169	rs3935584	2	233929283	0.0013611	20.6324	C	T	-0.0525838	0.0115757	6.78e-06	15140	C	T	-0.000201001	0.00029409	0.49	462933
family.Desulfovibrionaceae.id.3169	rs4506934	17	2856662	0.00145749	21.9424	C	T	-0.0943381	0.020138	3.16e-06	15035	C	T	-0.000357214	0.000478909	0.46	462933
family.Desulfovibrionaceae.id.3169	rs6058181	20	33694801	0.00167245	25.2494	C	T	0.0834742	0.0166111	2.7e-07	15074	C	T	0.00245437	0.000448646	4.49997e-08	462933
family.Desulfovibrionaceae.id.3169	rs7164160	15	96159374	0.00129848	19.6846	A	T	-0.0574455	0.0129468	7.34e-06	15142	A	T	-0.000381321	0.000323533	0.24	462933
family.Desulfovibrionaceae.id.3169	rs72647048	8	57865378	0.00133931	20.3043	T	C	-0.0770089	0.017089	9.61e-06	15142	T	C	-0.000124733	0.000452778	0.780001	462933
family.Desulfovibrionaceae.id.3169	rs9928243	16	71541641	0.00139437	21.1389	C	A	-0.0541732	0.0117819	4.48e-06	15141	C	A	-0.000371546	0.000296513	0.21	462933
family.Enterobacteriaceae.id.3469	rs11026530	11	22379097	0.00144179	19.4678	T	C	0.0822408	0.0186379	9.43e-06	13485	T	C	0.000486973	0.00045359	0.28	462933
family.Enterobacteriaceae.id.3469	rs111229068	11	2563450	0.00169114	20.9176	A	T	0.110561	0.0241719	3.65e-06	12350	A	T	-0.0001583	0.000566806	0.780001	462933
family.Enterobacteriaceae.id.3469	rs2374342	2	42133542	0.00156913	21.3345	C	A	0.0582927	0.0126195	4.52e-06	13577	C	A	0.00021291	0.000303944	0.48	462933
family.Enterobacteriaceae.id.3469	rs35673018	16	54327745	0.00147261	19.65	G	A	0.0899642	0.0202934	7.63e-06	13326	G	A	5.68927e-05	0.00047649	0.9	462933
family.Enterobacteriaceae.id.3469	rs4792380	17	13521040	0.00157431	20.1215	A	T	0.115598	0.0257683	9.49e-06	12763	A	T	-0.000286169	0.000658793	0.66	462933
family.Enterobacteriaceae.id.3469	rs504442	18	55145547	0.00145082	19.7249	T	G	0.084159	0.0189479	5.17e-06	13578	T	G	-4.31912e-05	0.000456588	0.92	462933
family.Enterobacteriaceae.id.3469	rs61973590	14	27718039	0.00150869	20.5008	C	G	-0.0605392	0.0133696	8.54e-06	13570	C	G	-0.00021924	0.000325449	0.5	462933
family.Enterobacteriaceae.id.3469	rs62210023	20	55340092	0.00160616	21.739	A	G	0.0606754	0.0130125	3.13e-06	13515	A	G	0.00010609	0.000308641	0.73	462933
family.Enterobacteriaceae.id.3469	rs78143293	18	57672335	0.00182336	24.7882	A	G	-0.0848521	0.0170415	1.2e-06	13572	A	G	-0.000220554	0.000403276	0.58	462933
family.Enterobacteriaceae.id.3469	rs79757635	13	110840418	0.00145957	19.6117	C	A	0.0758597	0.0171286	9.32e-06	13419	C	A	-0.000110656	0.000420121	0.79	462933
family.Enterobacteriaceae.id.3469	rs80319214	2	4015933	0.00166229	21.0446	C	G	0.0990404	0.0215877	6.95e-06	12641	C	G	3.68498e-05	0.000505446	0.94	462933
family.Erysipelotrichaceae.id.2149	rs1074800	5	3002546	0.00114877	20.4567	A	G	0.0492438	0.010887	6.15e-06	17789	A	G	-0.000736017	0.000306305	0.016	462933
family.Erysipelotrichaceae.id.2149	rs10781552	10	133897233	0.00127068	22.6304	C	T	-0.0552212	0.0116074	2.33e-06	17789	C	T	0.000101048	0.000315639	0.75	462933
family.Erysipelotrichaceae.id.2149	rs17530232	13	40385457	0.00126433	21.0397	A	G	0.10305	0.0224648	2.79e-06	16622	A	G	-0.000189722	0.000584126	0.75	462933
family.Erysipelotrichaceae.id.2149	rs1884466	1	64139196	0.00108423	19.7576	C	T	-0.0475363	0.0106939	9.53e-06	18205	C	T	-0.00042722	0.000300899	0.16	462933
family.Erysipelotrichaceae.id.2149	rs2300774	3	195793712	0.00132092	24.0911	G	A	0.0524152	0.0106784	8.95e-07	18216	G	A	3.90107e-05	0.00029914	0.9	462933
family.Erysipelotrichaceae.id.2149	rs290833	1	97457427	0.0011198	19.9402	T	G	-0.0497374	0.0111376	8.03e-06	17789	T	G	-0.000111058	0.000304949	0.719999	462933
family.Erysipelotrichaceae.id.2149	rs35161940	17	70327224	0.00126771	23.1157	T	C	-0.0806041	0.0167641	1.85e-06	18213	T	C	0.000187176	0.000458185	0.68	462933
family.Erysipelotrichaceae.id.2149	rs4078432	14	48997206	0.00116359	20.7209	C	T	-0.0608929	0.0133764	4.23e-06	17789	C	T	-0.000256182	0.000380381	0.5	462933
family.Erysipelotrichaceae.id.2149	rs56970041	14	80357610	0.001063	19.3832	T	G	0.0724144	0.0164471	5.4e-06	18217	T	G	0.000959405	0.000471595	0.0420001	462933
family.Erysipelotrichaceae.id.2149	rs62504403	8	38803551	0.00166794	28.3673	C	T	0.0681159	0.0127883	1.12e-07	16981	C	T	-0.000268489	0.000339791	0.43	462933
family.Erysipelotrichaceae.id.2149	rs7234058	18	5830507	0.00140515	23.741	T	C	-0.0945759	0.0194091	9.12e-07	16874	T	C	0.000274015	0.000485182	0.57	462933
family.Erysipelotrichaceae.id.2149	rs7826267	8	2954952	0.00100859	17.753	T	G	-0.0839071	0.0199131	9.28e-06	17586	T	G	-0.000100006	0.000582505	0.86	462933
family.Erysipelotrichaceae.id.2149	rs8003149	14	56156504	0.00116526	21.2454	C	T	0.0538798	0.0116888	4.08e-06	18213	C	T	0.000275077	0.000325422	0.4	462933
family.FamilyXI.id.1936	rs10759623	9	115821485	0.00799161	25.4086	C	T	-0.162115	0.032151	5.78e-07	3156	C	T	-5.93993e-05	0.000379887	0.88	462933
family.FamilyXI.id.1936	rs11547158	7	148921732	0.00719197	22.6812	A	G	-0.177599	0.0372795	2.7e-06	3133	A	G	0.000114214	0.000423213	0.79	462933
family.FamilyXI.id.1936	rs17379710	11	35334668	0.00670644	21.2949	T	C	-0.116383	0.0252125	3.97e-06	3156	T	C	0.000192676	0.000293501	0.51	462933
family.FamilyXI.id.1936	rs2155352	11	95357209	0.00780986	24.7789	A	G	-0.150538	0.0302319	6.63e-07	3150	A	G	-0.000232911	0.000354404	0.51	462933
family.FamilyXI.id.1936	rs2156611	18	43345864	0.00632058	20.0555	T	C	-0.112486	0.0251099	9.43e-06	3155	T	C	-0.000567349	0.000292863	0.0530005	462933
family.FamilyXI.id.1936	rs3733511	4	119955787	0.00685865	21.7816	A	G	0.128253	0.0274718	3.39e-06	3156	A	G	0.000148091	0.000318342	0.64	462933
family.FamilyXI.id.1936	rs488164	1	239995451	0.00674544	21.3721	T	G	0.117998	0.025516	4.8e-06	3149	T	G	-0.000316515	0.000298424	0.29	462933
family.FamilyXI.id.1936	rs6025153	20	55348292	0.00650767	20.4893	G	C	0.118619	0.0261969	7.07e-06	3130	G	C	0.000299154	0.000300099	0.32	462933
family.FamilyXI.id.1936	rs697771	16	54115200	0.00689836	21.8808	A	G	-0.117677	0.0251491	3.19e-06	3152	A	G	-0.000192646	0.000295887	0.51	462933
family.FamilyXI.id.1936	rs78222136	16	64956642	0.00611929	19.2959	G	C	0.224835	0.0511672	8.41e-06	3136	G	C	-0.000743516	0.00056521	0.19	462933
family.FamilyXIII.id.1957	rs10404377	19	16174657	0.0012469	20.3086	C	A	-0.0503183	0.011165	6.99e-06	16269	C	A	0.000406522	0.000307316	0.19	462933
family.FamilyXIII.id.1957	rs118170811	10	102366896	0.00236457	22.8556	A	G	0.151619	0.0317112	1.8e-06	9645	A	G	-0.000103366	0.000639903	0.87	462933
family.FamilyXIII.id.1957	rs12643275	4	162211872	0.00137322	22.369	A	T	-0.0550907	0.0116474	2.42e-06	16269	A	T	-0.000194856	0.000308062	0.53	462933
family.FamilyXIII.id.1957	rs12904405	15	94105415	0.00117306	19.5438	A	G	-0.0851896	0.0192688	7.67e-06	16643	A	G	0.000277023	0.000505976	0.58	462933
family.FamilyXIII.id.1957	rs1887048	1	65170838	0.00119652	20.0239	G	A	0.0579979	0.0129602	9.65e-06	16717	G	A	-0.000388624	0.000342541	0.26	462933
family.FamilyXIII.id.1957	rs1999289	21	19685992	0.00128572	20.9417	A	T	-0.0637366	0.013927	2.54e-06	16269	A	T	0.000831244	0.000377974	0.0280001	462933
family.FamilyXIII.id.1957	rs3098182	15	50802980	0.00127243	21.3136	G	T	0.0508511	0.011014	4.04e-06	16731	G	T	0.000445022	0.000296175	0.13	462933
family.FamilyXIII.id.1957	rs4293737	3	32373530	0.00298364	17.0636	A	G	-0.112091	0.0271305	8.38e-06	5704	A	G	0.000290256	0.000780804	0.709999	462933
family.FamilyXIII.id.1957	rs482905	1	166557202	0.00131293	22.0008	G	T	0.0596528	0.012717	3.72e-06	16737	G	T	-0.000519985	0.000336098	0.12	462933
family.FamilyXIII.id.1957	rs6501525	17	70218627	0.00144871	23.6003	A	G	0.0561559	0.0115587	1.24e-06	16269	A	G	3.97033e-05	0.000304765	0.9	462933
family.FamilyXIII.id.1957	rs66753613	1	39212021	0.00125083	20.3728	G	A	0.0651136	0.0144251	8.08e-06	16269	G	A	-1.85737e-05	0.000365706	0.96	462933
family.FamilyXIII.id.1957	rs6797051	3	88995218	0.00131996	22.1188	C	T	-0.0805984	0.0171364	4.89e-06	16737	C	T	-0.000281087	0.000443765	0.53	462933
family.FamilyXIII.id.1957	rs7076829	10	7906746	0.00129771	21.1373	T	A	-0.0516394	0.0112313	4.76e-06	16269	T	A	0.000174774	0.000299233	0.56	462933
family.FamilyXIII.id.1957	rs7514702	1	186914023	0.0013086	21.9281	T	C	-0.0663236	0.0141626	3.92e-06	16737	T	C	-0.00025077	0.000381149	0.51	462933
family.Lachnospiraceae.id.1987	rs10402491	19	13425799	0.00108165	19.8503	C	T	0.0661701	0.014851	7.58e-06	18334	C	T	-0.000264335	0.000442474	0.55	462933
family.Lachnospiraceae.id.1987	rs11139361	9	72179847	0.00109096	20.0202	T	C	0.0494463	0.0110503	4.26e-06	18333	T	C	-9.53998e-05	0.000301914	0.75	462933
family.Lachnospiraceae.id.1987	rs112040820	17	80469064	0.00125655	22.0298	A	G	0.0549584	0.0117086	2.42e-06	17512	A	G	-1.5357e-05	0.000326917	0.96	462933
family.Lachnospiraceae.id.1987	rs11755180	6	161957425	0.00119991	22.0221	C	G	-0.049227	0.0104894	2.69e-06	18333	C	G	-0.000514565	0.000292933	0.0790005	462933
family.Lachnospiraceae.id.1987	rs11841382	13	38004672	0.000921335	16.911	G	T	-0.0718128	0.017462	9.58e-06	18340	G	T	0.000244414	0.000540214	0.649999	462933
family.Lachnospiraceae.id.1987	rs11979110	7	130436459	0.00123789	22.7274	T	C	-0.0500924	0.0105069	1.82e-06	18339	T	C	-0.000104352	0.000290838	0.719999	462933
family.Lachnospiraceae.id.1987	rs1205443	20	36876868	0.00112291	19.9844	A	G	0.0501415	0.0112157	7.29e-06	17779	A	G	0.000416804	0.000311166	0.18	462933
family.Lachnospiraceae.id.1987	rs12760724	1	214031969	0.00109777	20.1531	A	C	-0.0484566	0.0107934	7.27e-06	18340	A	C	0.000174637	0.000299142	0.56	462933
family.Lachnospiraceae.id.1987	rs13005175	2	232469722	0.00122348	20.6911	A	G	0.0993483	0.0218395	8.37e-06	16893	A	G	0.000323388	0.000602775	0.59	462933
family.Lachnospiraceae.id.1987	rs146660815	6	46664437	0.00492614	20.3467	T	C	-0.215114	0.0476778	6.53e-06	4112	T	C	0.000250947	0.00072625	0.73	462933
family.Lachnospiraceae.id.1987	rs2159863	4	10245354	0.00112775	20.7041	A	G	-0.0585831	0.0128742	3.7e-06	18340	A	G	0.000152228	0.000357109	0.67	462933
family.Lachnospiraceae.id.1987	rs2910921	5	32348593	0.00304674	20.008	T	C	0.160302	0.035832	8.42e-06	6549	T	C	0.000291254	0.000707001	0.68	462933
family.Lachnospiraceae.id.1987	rs3127230	10	103392503	0.00109697	20.1384	C	T	-0.0503537	0.0112201	6.2e-06	18340	C	T	-0.000144524	0.000309964	0.64	462933
family.Lachnospiraceae.id.1987	rs35524804	9	100113683	0.00131619	23.5342	T	C	-0.0607481	0.0125216	2.45e-06	17859	T	C	-0.000124732	0.000339656	0.709999	462933
family.Lachnospiraceae.id.1987	rs7359994	19	29408858	0.0010898	20.0065	T	C	-0.0503142	0.0112482	5.36e-06	18340	T	C	0.000389937	0.000303597	0.2	462933
family.Lachnospiraceae.id.1987	rs79086868	9	133791605	0.00127119	22.2996	T	C	0.0776723	0.0164472	3.01e-06	17522	T	C	0.000548249	0.000448106	0.22	462933
family.Lachnospiraceae.id.1987	rs959845	4	186906801	0.00117287	20.9686	C	T	-0.0493666	0.0107801	5.17e-06	17859	C	T	0.00051628	0.000302199	0.0879995	462933
family.Lachnospiraceae.id.1987	rs9929145	16	76559184	0.00165376	26.2786	G	A	-0.125721	0.0245233	2.84e-07	15866	G	A	-0.00149958	0.000614171	0.015	462933
family.Lactobacillaceae.id.1836	rs11674854	2	28903275	0.00331316	22.4315	C	T	-0.0830224	0.0175267	2.6e-06	6750	C	T	-0.000379258	0.000300301	0.21	462933
family.Lactobacillaceae.id.1836	rs1530559	2	135755629	0.00281615	19.057	G	A	0.0772453	0.0176921	9.65e-06	6750	G	A	-0.000331616	0.000294527	0.26	462933
family.Lactobacillaceae.id.1836	rs1590596	13	23836941	0.00328374	22.2317	C	G	-0.10381	0.0220135	3.9e-06	6750	C	G	0.000207486	0.000361431	0.57	462933
family.Lactobacillaceae.id.1836	rs16861661	1	18501459	0.00479934	25.9595	G	A	-0.193287	0.0379293	2.7e-07	5385	G	A	0.000147706	0.000569427	0.8	462933
family.Lactobacillaceae.id.1836	rs328312	16	73890910	0.00340175	24.0608	T	A	0.082529	0.0168225	8.69e-07	7051	T	A	6.23778e-06	0.000292923	0.98	462933
family.Lactobacillaceae.id.1836	rs6092149	20	54192992	0.00334444	23.5031	A	T	-0.0825646	0.0170282	1.38e-06	7006	A	T	8.44862e-05	0.000294552	0.77	462933
family.Lactobacillaceae.id.1836	rs62314653	4	109896462	0.00337601	20.3721	C	A	0.177082	0.0392269	6.59e-06	6016	C	A	7.30748e-05	0.000654658	0.91	462933
family.Lactobacillaceae.id.1836	rs74599091	1	179720669	0.00408808	20.315	A	G	0.191613	0.0425039	7.7e-06	4951	A	G	0.000388713	0.000664075	0.56	462933
family.Lactobacillaceae.id.1836	rs768253	8	69010103	0.00304635	21.5638	T	G	-0.0792344	0.0170604	3.61e-06	7059	T	G	0.000214471	0.000298291	0.47	462933
family.Lactobacillaceae.id.1836	rs77478751	3	173151665	0.00574984	21.409	A	G	-0.219178	0.0473566	5.96e-06	3704	A	G	0.00019236	0.000594971	0.75	462933
family.Lactobacillaceae.id.1836	rs921925	19	6928017	0.00346941	24.5479	A	C	0.0999419	0.0201687	5.77e-07	7053	A	C	0.000412248	0.00035811	0.25	462933
family.Lactobacillaceae.id.1836	rs9345899	6	67559323	0.00298621	19.768	A	G	-0.124042	0.0278946	9.45e-06	6602	A	G	0.000147595	0.000464334	0.75	462933
family.Methanobacteriaceae.id.121	rs10202904	2	125440268	0.00719054	26.747	T	G	-0.121754	0.0235357	3.01e-07	3695	T	G	0.000116727	0.000295034	0.69	462933
family.Methanobacteriaceae.id.121	rs10424197	19	46439321	0.00543557	20.1997	G	A	-0.111274	0.0247517	9.28e-06	3698	G	A	-5.23684e-05	0.000308725	0.87	462933
family.Methanobacteriaceae.id.121	rs11018665	11	89349287	0.00532506	19.7868	A	T	0.111465	0.0250516	6.52e-06	3698	A	T	-0.000501203	0.000304692	0.1	462933
family.Methanobacteriaceae.id.121	rs12825290	12	43701132	0.00610007	19.2841	C	G	-0.216781	0.0493496	6.08e-06	3144	C	G	-0.000520591	0.000589714	0.38	462933
family.Methanobacteriaceae.id.121	rs4257531	3	2086167	0.00638397	20.303	G	A	0.164498	0.0364959	7.44e-06	3162	G	A	-6.25921e-05	0.000439732	0.89	462933
family.Methanobacteriaceae.id.121	rs56131665	5	178160975	0.00575311	20.6574	G	A	0.178661	0.039298	6.18e-06	3572	G	A	-0.000127454	0.000490664	0.8	462933
family.Methanobacteriaceae.id.121	rs62241835	3	15013348	0.00695183	23.6687	G	T	-0.203385	0.0417931	1.63e-06	3383	G	T	0.000105215	0.000491563	0.83	462933
family.Methanobacteriaceae.id.121	rs6508769	19	28827760	0.00594705	19.8444	T	C	0.153519	0.0344519	8.23e-06	3319	T	C	-0.000150983	0.000405074	0.709999	462933
family.Methanobacteriaceae.id.121	rs73068003	7	10773932	0.0054432	20.1953	G	T	-0.15814	0.0351803	8.45e-06	3692	G	T	6.05722e-05	0.000436152	0.89	462933
family.Methanobacteriaceae.id.121	rs73457410	13	41956181	0.0069034	24.3021	A	G	0.21534	0.0436695	1.41e-06	3498	A	G	-0.000215109	0.000543121	0.69	462933
family.Methanobacteriaceae.id.121	rs75208022	12	21338861	0.00673465	21.7038	C	T	-0.227245	0.048763	5.92e-06	3203	C	T	0.000416168	0.000567842	0.46	462933
family.Methanobacteriaceae.id.121	rs894996	4	104418307	0.00647634	23.3364	C	A	0.216999	0.0449076	1.88e-06	3582	C	A	0.000692575	0.000546328	0.2	462933
family.Pasteurellaceae.id.3689	rs10840326	11	9951672	0.00251995	23.1208	C	G	-0.0717634	0.0149229	1.44e-06	9154	C	G	0.000312986	0.000293121	0.29	462933
family.Pasteurellaceae.id.3689	rs10965428	9	22718481	0.00242411	21.5565	C	A	-0.119902	0.0258219	4.29e-06	8873	C	A	0.000390285	0.000534895	0.47	462933
family.Pasteurellaceae.id.3689	rs111582866	16	48742489	0.00228738	19.7486	G	A	-0.113957	0.0256403	7.07e-06	8616	G	A	-0.000721381	0.000475243	0.13	462933
family.Pasteurellaceae.id.3689	rs12050685	15	73477482	0.00205559	19.3809	A	G	-0.0670948	0.015239	9.19e-06	9411	A	G	-0.00036075	0.0002968	0.22	462933
family.Pasteurellaceae.id.3689	rs12191680	6	129224488	0.00284783	26.8632	C	G	0.102214	0.0197189	3.05e-07	9408	C	G	0.000188075	0.000407367	0.64	462933
family.Pasteurellaceae.id.3689	rs16970009	17	32862601	0.00402952	19.0194	A	G	0.187381	0.0429572	7.32e-06	4703	A	G	-0.00100643	0.000685768	0.14	462933
family.Pasteurellaceae.id.3689	rs35510	12	115491973	0.00246831	21.4507	A	G	0.122729	0.0264958	4.02e-06	8671	A	G	-0.000148885	0.000499476	0.77	462933
family.Pasteurellaceae.id.3689	rs4822728	22	26891808	0.00224269	21.1512	T	C	0.0685479	0.0149032	4.72e-06	9412	T	C	-0.000151589	0.000300114	0.61	462933
family.Pasteurellaceae.id.3689	rs6092684	20	57274077	0.00231886	21.7643	A	T	0.0684647	0.014674	3.44e-06	9366	A	T	-0.000252546	0.000291571	0.39	462933
family.Pasteurellaceae.id.3689	rs62568866	9	6818307	0.00257817	20.7252	T	A	-0.118018	0.0259206	7.23e-06	8020	T	A	-0.000731126	0.000468195	0.12	462933
family.Pasteurellaceae.id.3689	rs6972479	7	116918060	0.00230179	19.8733	A	G	-0.0781862	0.0175366	7.75e-06	8616	A	G	0.000334164	0.000346991	0.34	462933
family.Pasteurellaceae.id.3689	rs72756943	5	26531908	0.00264982	21.3027	G	A	0.13988	0.0303029	3.35e-06	8020	G	A	0.00066214	0.000540346	0.22	462933
family.Pasteurellaceae.id.3689	rs73139353	3	97972214	0.00518471	21.0815	A	C	-0.222573	0.0484634	8.71e-06	4047	A	C	0.000157765	0.000705205	0.82	462933
family.Pasteurellaceae.id.3689	rs731534	20	5412480	0.00227652	20.7932	C	G	-0.0986502	0.0216316	9.46e-06	9115	C	G	-0.000253252	0.000450776	0.57	462933
family.Pasteurellaceae.id.3689	rs76022354	10	94306385	0.00634087	23.5471	C	T	0.24289	0.0500406	1.83e-06	3692	C	T	-0.000561323	0.000710264	0.43	462933
family.Pasteurellaceae.id.3689	rs78909003	9	105650242	0.00639517	23.4025	T	C	-0.241159	0.0498372	2.05e-06	3638	T	C	-0.000867911	0.000654901	0.19	462933
family.Pasteurellaceae.id.3689	rs9382510	6	55448491	0.0028527	26.915	C	T	-0.0881865	0.0169965	2.48e-07	9410	C	T	1.57096e-05	0.00034403	0.96	462933
family.Pasteurellaceae.id.3689	rs9895850	17	64535013	0.00388961	18.4892	T	C	-0.176406	0.041017	9.08e-06	4737	T	C	0.000683337	0.000662712	0.3	462933
family.Pasteurellaceae.id.3689	rs9938097	16	84977389	0.00214481	20.2045	T	C	-0.0710386	0.0158024	8.23e-06	9402	T	C	-0.000151222	0.00031233	0.630001	462933
family.Peptococcaceae.id.2024	rs117452796	9	9423378	0.00692299	22.0222	A	G	-0.257982	0.0549569	3.15e-06	3161	A	G	0.00039005	0.000651104	0.55	462933
family.Peptococcaceae.id.2024	rs12144792	1	27418225	0.00193577	20.7839	C	T	0.064399	0.0141246	5.82e-06	10718	C	T	-0.000181529	0.000297106	0.54	462933
family.Peptococcaceae.id.2024	rs12634826	3	182984048	0.00230955	24.0263	T	G	-0.0739885	0.0150931	1.01e-06	10381	T	G	3.46288e-05	0.00031696	0.91	462933
family.Peptococcaceae.id.2024	rs12992764	2	188895743	0.00224521	23.4973	T	G	0.0684213	0.0141137	1.46e-06	10444	T	G	-0.000149796	0.000302408	0.62	462933
family.Peptococcaceae.id.2024	rs150600492	10	129175962	0.00224438	21.9521	A	C	0.135774	0.0289757	2.31e-06	9761	A	C	-0.000217141	0.00056689	0.7	462933
family.Peptococcaceae.id.2024	rs35703006	8	28614217	0.00227647	24.4435	G	T	0.0812655	0.0164355	4.95e-07	10715	G	T	-0.000417598	0.000361566	0.25	462933
family.Peptococcaceae.id.2024	rs4990837	8	3580757	0.00223332	23.9858	A	G	0.0910387	0.0185869	1.74e-06	10718	A	G	-0.000609327	0.000411246	0.14	462933
family.Peptococcaceae.id.2024	rs75430375	5	89252884	0.00258574	21.7065	C	T	-0.147941	0.0317498	3.41e-06	8375	C	T	-0.000341693	0.000579868	0.56	462933
family.Peptococcaceae.id.2024	rs75898026	13	113561082	0.00214242	22.4192	A	G	-0.0821779	0.0173541	2.02e-06	10444	A	G	0.000696379	0.000371777	0.061	462933
family.Peptostreptococcaceae.id.2042	rs10805326	4	14326193	0.0013248	21.3031	G	A	0.0566637	0.012276	4.03e-06	16061	G	A	0.000251507	0.000322297	0.44	462933
family.Peptostreptococcaceae.id.2042	rs117020988	7	46710977	0.0035052	24.0212	C	T	0.182411	0.0372126	1.03e-06	6831	C	T	0.000605238	0.000662442	0.36	462933
family.Peptostreptococcaceae.id.2042	rs12377846	9	16786784	0.00645175	24.2473	C	A	-0.252	0.0511627	7.26e-07	3736	C	A	0.000898388	0.000679828	0.19	462933
family.Peptostreptococcaceae.id.2042	rs12986312	19	17414138	0.00128906	20.6103	T	G	0.0571818	0.0125947	5.77e-06	15970	T	G	0.000282954	0.00031678	0.37	462933
family.Peptostreptococcaceae.id.2042	rs1467258	17	38216487	0.00128143	19.9929	G	A	0.072584	0.0162321	7.9e-06	15584	G	A	1.95863e-05	0.000410415	0.96	462933
family.Peptostreptococcaceae.id.2042	rs1520207	3	151781175	0.00135841	21.839	C	T	0.0525658	0.0112476	3.17e-06	16057	C	T	-0.000291749	0.000295254	0.32	462933
family.Peptostreptococcaceae.id.2042	rs2644627	8	26726641	0.00153947	24.7574	C	G	-0.0558506	0.011224	6.33e-07	16059	C	G	-3.91212e-06	0.000293641	0.99	462933
family.Peptostreptococcaceae.id.2042	rs4692811	4	171180190	0.0015911	25.5922	C	T	0.0642075	0.0126913	4.21e-07	16061	C	T	-0.000103061	0.000329353	0.75	462933
family.Peptostreptococcaceae.id.2042	rs59865771	16	89246670	0.00126704	20.3466	C	T	-0.0573764	0.0127192	7.69e-06	16040	C	T	-0.000460873	0.000337775	0.17	462933
family.Peptostreptococcaceae.id.2042	rs59987323	22	37976422	0.00141157	22.0262	C	T	-0.0537078	0.011443	2.7e-06	15584	C	T	0.000515375	0.000317471	0.1	462933
family.Peptostreptococcaceae.id.2042	rs61841503	10	17019559	0.00211481	32.4908	G	A	0.0919658	0.0161331	9.8e-09	15333	G	A	-0.000407097	0.000388744	0.3	462933
family.Peptostreptococcaceae.id.2042	rs6721459	2	67852836	0.00128903	20.7273	A	G	0.0509823	0.0111975	5.08e-06	16061	A	G	0.000543319	0.000291674	0.0619998	462933
family.Peptostreptococcaceae.id.2042	rs75819860	18	65324280	0.00188866	22.1296	T	A	0.126264	0.0268383	2.49e-06	11697	T	A	4.8313e-05	0.0006407	0.94	462933
family.Peptostreptococcaceae.id.2042	rs76982728	7	44312824	0.00193203	21.6477	T	C	0.124203	0.0266923	3.24e-06	11185	T	C	-0.000637504	0.000634746	0.32	462933
family.Peptostreptococcaceae.id.2042	rs77540684	10	14650535	0.00139689	18.8747	T	G	0.106725	0.0245638	8.14e-06	13495	T	G	-0.000556288	0.000640338	0.38	462933
family.Peptostreptococcaceae.id.2042	rs9573937	13	77351196	0.00146469	23.556	A	G	-0.0693637	0.0142907	1.71e-06	16061	A	G	-5.28623e-05	0.000363611	0.88	462933
family.Porphyromonadaceae.id.943	rs10119172	9	2233969	0.00148147	26.7357	C	G	-0.0737324	0.014259	1.32e-07	18022	C	G	-0.000286127	0.000394919	0.47	462933
family.Porphyromonadaceae.id.943	rs10762312	10	71571863	0.00107641	19.4243	G	A	-0.052368	0.0118814	8.7e-06	18028	G	A	-7.44561e-05	0.00033521	0.82	462933
family.Porphyromonadaceae.id.943	rs10858364	9	138076081	0.0011608	20.9489	G	T	0.055316	0.012085	4.31e-06	18028	G	T	-0.000528682	0.000354972	0.14	462933
family.Porphyromonadaceae.id.943	rs17065783	3	62035586	0.00129645	23.4002	A	G	-0.059133	0.0122235	1.79e-06	18028	A	G	-5.22982e-05	0.000339824	0.88	462933
family.Porphyromonadaceae.id.943	rs1980561	14	63386516	0.00109262	19.717	A	G	-0.0485289	0.0109284	8.95e-06	18028	A	G	-0.00051744	0.000302266	0.0870001	462933
family.Porphyromonadaceae.id.943	rs3111851	3	189854046	0.00127837	23.0683	C	G	0.0581896	0.0121147	2.19e-06	18024	C	G	0.000471607	0.000336445	0.16	462933
family.Porphyromonadaceae.id.943	rs35233670	17	63750903	0.0011058	19.9507	T	C	-0.0473576	0.010602	7.91e-06	18024	T	C	0.000103577	0.00029404	0.719999	462933
family.Porphyromonadaceae.id.943	rs35961441	1	240929774	0.00118903	19.4899	A	C	0.0915257	0.0207306	8.37e-06	16374	A	C	-0.000431365	0.000526253	0.41	462933
family.Porphyromonadaceae.id.943	rs6953849	7	69251692	0.00125768	22.6994	A	G	0.0718149	0.0150724	2.44e-06	18028	A	G	0.000465385	0.000412726	0.26	462933
family.Porphyromonadaceae.id.943	rs7330827	13	23531802	0.00138968	19.1375	T	C	-0.103842	0.0237355	8.05e-06	13754	T	C	0.00014939	0.00056201	0.79	462933
family.Porphyromonadaceae.id.943	rs864093	4	149825977	0.00111863	20.1859	A	C	-0.0527939	0.0117499	9.6e-06	18027	A	C	-0.000101342	0.00032306	0.75	462933
family.Prevotellaceae.id.960	rs10131942	14	78643095	0.00131729	19.6126	C	G	0.0701212	0.0158326	8.61e-06	14871	C	G	0.00010993	0.000398711	0.780001	462933
family.Prevotellaceae.id.960	rs12057990	1	99470269	0.00133601	19.8863	C	T	0.0589878	0.0132268	8.97e-06	14867	C	T	8.5137e-05	0.000333121	0.8	462933
family.Prevotellaceae.id.960	rs12118202	1	210681370	0.00175056	26.0712	T	C	-0.0751986	0.0147265	5.54e-07	14869	T	C	0.000189886	0.000357444	0.6	462933
family.Prevotellaceae.id.960	rs13069367	3	71801830	0.0013668	20.3357	A	C	-0.0539768	0.0119687	7.39e-06	14860	A	C	-0.000353173	0.00030622	0.25	462933
family.Prevotellaceae.id.960	rs148376875	3	170126707	0.00155486	22.2489	T	G	0.084515	0.0179163	2.08e-06	14289	T	G	0.000278916	0.000445578	0.53	462933
family.Prevotellaceae.id.960	rs2206482	20	9771109	0.00158207	23.4612	T	G	-0.0569105	0.0117486	1.3e-06	14808	T	G	2.58453e-05	0.000293132	0.93	462933
family.Prevotellaceae.id.960	rs2278540	3	32408916	0.00135989	20.215	G	A	0.0554249	0.0123265	8.44e-06	14847	G	A	-0.000441754	0.000308889	0.15	462933
family.Prevotellaceae.id.960	rs34071565	11	119712522	0.0024876	20.2846	T	A	-0.1567	0.0347882	5.6e-06	8136	T	A	0.00185598	0.000659813	0.00490004	462933
family.Prevotellaceae.id.960	rs34660375	5	180283881	0.00142782	20.4284	A	G	-0.0805894	0.0178291	7.4e-06	14289	A	G	-0.000887773	0.000445615	0.0460002	462933
family.Prevotellaceae.id.960	rs3758087	8	23714609	0.00137565	20.4827	T	C	0.0564199	0.0124655	8.61e-06	14871	T	C	0.000141061	0.000309016	0.649999	462933
family.Prevotellaceae.id.960	rs3860225	1	111161677	0.00167703	24.9776	A	G	0.083936	0.0167936	5.5e-07	14871	A	G	-2.18095e-05	0.000422275	0.96	462933
family.Prevotellaceae.id.960	rs4493272	2	118910912	0.00176419	26.271	T	C	-0.0604992	0.0118027	3.02e-07	14867	T	C	-2.68631e-05	0.000297562	0.93	462933
family.Prevotellaceae.id.960	rs4685827	3	4864877	0.00146684	21.8366	T	C	-0.0679529	0.0145407	2.77e-06	14867	T	C	0.000159696	0.0003593	0.66	462933
family.Prevotellaceae.id.960	rs7252711	19	17460999	0.0014377	20.9314	A	G	-0.0740876	0.0161926	5.57e-06	14540	A	G	-9.61245e-05	0.000432655	0.82	462933
family.Prevotellaceae.id.960	rs7975087	12	21404832	0.00132403	19.713	C	A	-0.0601448	0.0135454	7.59e-06	14871	C	A	0.000423267	0.000338593	0.21	462933
family.Prevotellaceae.id.960	rs9586501	13	105075823	0.00145513	21.6634	G	A	0.0592681	0.0127329	2.59e-06	14868	G	A	0.000131305	0.000315737	0.68	462933
family.Prevotellaceae.id.960	rs9958960	18	63018983	0.00197074	27.7614	G	A	-0.0914807	0.0173611	1.06e-07	14061	G	A	0.000226213	0.000417977	0.59	462933
family.Rhodospirillaceae.id.2717	rs1035406	5	119372737	0.00240896	20.4797	G	A	-0.11354	0.0250863	5.84e-06	8483	G	A	-3.46775e-05	0.00045978	0.94	462933
family.Rhodospirillaceae.id.2717	rs11591293	10	113419797	0.00257258	21.9182	G	T	0.0743184	0.0158724	2.67e-06	8500	G	T	-0.000213023	0.000297957	0.47	462933
family.Rhodospirillaceae.id.2717	rs12977163	19	28641647	0.0024788	19.984	G	C	0.0730951	0.0163491	7.63e-06	8044	G	C	0.000193475	0.00030019	0.52	462933
family.Rhodospirillaceae.id.2717	rs13336560	16	88554243	0.00245457	19.7045	C	T	-0.0701719	0.0158061	9.17e-06	8010	C	T	7.74551e-06	0.000304908	0.98	462933
family.Rhodospirillaceae.id.2717	rs1549633	5	27945645	0.00260138	20.8862	A	C	0.0999312	0.0218634	4.7e-06	8010	A	C	0.000410587	0.000412001	0.32	462933
family.Rhodospirillaceae.id.2717	rs1923415	6	89268715	0.00226769	19.3169	A	G	-0.0999238	0.0227326	9.64e-06	8501	A	G	-0.00049429	0.000441932	0.26	462933
family.Rhodospirillaceae.id.2717	rs3754624	2	225633812	0.00276714	23.5693	C	T	0.0971389	0.0200064	1.71e-06	8496	C	T	0.000240926	0.000374968	0.52	462933
family.Rhodospirillaceae.id.2717	rs4278423	10	2670553	0.0024418	20.8037	T	C	0.107529	0.0235725	3.12e-06	8501	T	C	0.000226358	0.000445899	0.61	462933
family.Rhodospirillaceae.id.2717	rs4822789	22	27173098	0.00245826	20.9221	G	C	0.0734321	0.0160521	7.01e-06	8492	G	C	0.000295315	0.000307598	0.34	462933
family.Rhodospirillaceae.id.2717	rs55876211	3	84471266	0.00253147	21.5518	C	T	-0.0911851	0.0196395	2.87e-06	8494	C	T	-0.000238802	0.000377922	0.53	462933
family.Rhodospirillaceae.id.2717	rs61933850	12	73139398	0.00304823	20.877	G	A	0.164808	0.0360647	7.23e-06	6830	G	A	-5.69925e-05	0.000595782	0.92	462933
family.Rhodospirillaceae.id.2717	rs6679026	1	78619512	0.00233549	19.8864	T	C	0.111984	0.0251088	9.95e-06	8497	T	C	-0.000344347	0.000474529	0.47	462933
family.Rhodospirillaceae.id.2717	rs7001029	8	131958403	0.00250129	20.1658	C	T	0.117366	0.0261324	5.35e-06	8044	C	T	-0.000312529	0.000501611	0.53	462933
family.Rhodospirillaceae.id.2717	rs72714493	1	92206218	0.00239679	20.4097	A	G	0.0816858	0.0180791	7.35e-06	8497	A	G	-0.000288726	0.000336328	0.39	462933
family.Rhodospirillaceae.id.2717	rs74354280	4	134192918	0.00232432	19.8004	C	T	-0.0911896	0.0204907	6.67e-06	8501	C	T	-0.000505513	0.000388322	0.19	462933
family.Rhodospirillaceae.id.2717	rs76784716	2	169033340	0.00266008	22.6603	A	G	0.136049	0.0285767	1.49e-06	8498	A	G	-0.000644152	0.000579916	0.27	462933
family.Rhodospirillaceae.id.2717	rs9813022	3	13726736	0.00311125	26.5156	A	G	-0.0842444	0.0163583	2.53e-07	8498	A	G	4.08691e-05	0.000318796	0.9	462933
family.Rikenellaceae.id.967	rs10217435	9	86052655	0.00113124	20.0195	C	T	-0.0883756	0.0197506	6.51e-06	17679	C	T	0.000126347	0.000590253	0.83	462933
family.Rikenellaceae.id.967	rs10832801	11	17589129	0.0011038	19.003	A	C	-0.0534763	0.0122666	7.5e-06	17199	A	C	-1.9548e-06	0.000329137	1	462933
family.Rikenellaceae.id.967	rs1939881	11	95304834	0.00150162	26.2157	G	A	-0.105589	0.0206213	5.64e-07	17434	G	A	0.000268186	0.000614093	0.66	462933
family.Rikenellaceae.id.967	rs2447496	8	99188924	0.00117872	20.2944	G	A	-0.0549203	0.0121904	6.09e-06	17199	G	A	0.000534236	0.000340862	0.12	462933
family.Rikenellaceae.id.967	rs2833282	21	32496710	0.0011596	20.5232	G	A	0.0711137	0.0156966	4.31e-06	17680	G	A	-0.00039752	0.000444126	0.37	462933
family.Rikenellaceae.id.967	rs35909684	8	144441740	0.0011204	19.6997	A	C	-0.0850181	0.0191539	7.1e-06	17565	A	C	-0.000640561	0.000512518	0.21	462933
family.Rikenellaceae.id.967	rs36021379	21	28515912	0.00119026	20.4932	A	G	-0.0656005	0.0144903	7.2e-06	17199	A	G	3.75646e-05	0.000389609	0.92	462933
family.Rikenellaceae.id.967	rs4264350	15	71658642	0.0013291	23.5111	T	C	-0.0526393	0.0108555	1.35e-06	17668	T	C	0.000487455	0.000295881	0.0990011	462933
family.Rikenellaceae.id.967	rs4783173	16	85396629	0.00112011	19.1574	C	G	0.0481514	0.0110006	7.06e-06	17086	C	G	-0.000137907	0.000295157	0.64	462933
family.Rikenellaceae.id.967	rs59663348	18	4069710	0.00117774	20.8422	G	A	0.0570915	0.0125048	6.12e-06	17678	G	A	-0.000423666	0.000362212	0.24	462933
family.Rikenellaceae.id.967	rs62532512	9	14158854	0.00124587	22.042	C	A	-0.0504257	0.0107399	2.76e-06	17672	C	A	0.000327738	0.000294968	0.27	462933
family.Rikenellaceae.id.967	rs67281112	7	135778919	0.00124256	21.395	G	C	0.0635814	0.0137451	3.63e-06	17199	G	C	0.000380047	0.000351843	0.28	462933
family.Rikenellaceae.id.967	rs6744030	2	174257127	0.00111859	19.6667	C	T	0.0696747	0.0157103	9.32e-06	17564	C	T	-0.000638201	0.000436816	0.14	462933
family.Rikenellaceae.id.967	rs67705352	1	19790706	0.00139718	24.7282	T	G	-0.0549688	0.0110534	6.58e-07	17676	T	G	-2.78853e-05	0.000302991	0.93	462933
family.Rikenellaceae.id.967	rs6837275	4	187842232	0.00133679	23.0195	A	G	0.0570355	0.011887	1.45e-06	17199	A	G	-0.000280464	0.000326203	0.39	462933
family.Rikenellaceae.id.967	rs7242694	18	10338470	0.00122174	21.036	C	T	-0.0618674	0.0134882	5.81e-06	17199	C	T	0.000566898	0.000371325	0.13	462933
family.Rikenellaceae.id.967	rs74474130	14	90270821	0.00195925	21.6981	T	G	0.137747	0.0295688	3.61e-06	11055	T	G	-0.000956659	0.000608629	0.12	462933
family.Rikenellaceae.id.967	rs77885767	14	21548634	0.00253568	21.5471	C	T	-0.156209	0.0336482	2.85e-06	8478	C	T	0.000179004	0.000677896	0.79	462933
family.Rikenellaceae.id.967	rs9389714	6	100244667	0.00111405	19.7161	C	T	-0.0636841	0.0143416	8.79e-06	17680	C	T	0.000248061	0.000404517	0.54	462933
family.Rikenellaceae.id.967	rs9578457	13	22867356	0.00212996	20.0601	G	A	-0.141478	0.0315848	3.99e-06	9400	G	A	-0.000701949	0.000644245	0.28	462933
family.Rikenellaceae.id.967	rs9603208	13	38044689	0.00149519	26.4715	G	T	0.0821173	0.0159596	1.92e-07	17680	G	T	0.00012479	0.000470718	0.79	462933
family.Streptococcaceae.id.1850	rs10028567	4	53657577	0.00145291	24.0763	C	T	-0.0934027	0.0190343	3.72e-06	16549	C	T	0.000590717	0.000504042	0.24	462933
family.Streptococcaceae.id.1850	rs11110281	12	100584014	0.00217516	33.3831	T	C	-0.130554	0.0225943	1.4e-08	15316	T	C	-0.00119258	0.000598728	0.0460002	462933
family.Streptococcaceae.id.1850	rs16950051	12	120729505	0.00141098	20.3878	A	G	0.107008	0.0236973	5.34e-06	14431	A	G	-0.00014704	0.000595422	0.8	462933
family.Streptococcaceae.id.1850	rs2370083	14	97526750	0.00126156	20.8597	G	T	-0.0842751	0.0184509	4.26e-06	16516	G	T	-0.000699393	0.000478429	0.14	462933
family.Streptococcaceae.id.1850	rs2952251	8	10143164	0.0015345	25.5272	A	G	-0.0639298	0.0126525	3.72e-07	16612	A	G	-0.000649415	0.000332402	0.051	462933
family.Streptococcaceae.id.1850	rs35344081	16	991253	0.00132592	22.0688	G	A	0.0609349	0.0129703	2.64e-06	16624	G	A	0.000242682	0.000343789	0.48	462933
family.Streptococcaceae.id.1850	rs395407	5	169689604	0.00142553	22.9639	G	C	-0.0826855	0.0172536	1.33e-06	16088	G	C	-4.74302e-05	0.000409028	0.91	462933
family.Streptococcaceae.id.1850	rs4968759	17	61298020	0.00143591	23.9021	A	G	-0.0544035	0.0111271	8.92e-07	16624	A	G	-0.000509158	0.000293705	0.0830004	462933
family.Streptococcaceae.id.1850	rs57646748	4	37452858	0.00121213	19.6093	G	A	-0.088021	0.019876	7.88e-06	16160	G	A	0.000410268	0.000567746	0.47	462933
family.Streptococcaceae.id.1850	rs6563952	16	73391982	0.0012114	20.164	G	C	0.0801931	0.0178576	8.71e-06	16627	G	C	-8.14745e-05	0.00051028	0.87	462933
family.Streptococcaceae.id.1850	rs6806351	3	132058723	0.00128297	20.8056	T	C	-0.0619209	0.0135744	6.94e-06	16198	T	C	-0.000134031	0.000345841	0.7	462933
family.Streptococcaceae.id.1850	rs72739637	15	41663393	0.00154319	23.3521	A	G	0.0927983	0.0192021	1.82e-06	15111	A	G	0.000584675	0.00046169	0.21	462933
family.Streptococcaceae.id.1850	rs76717940	3	94153993	0.00262558	20.3175	T	A	0.150606	0.0334079	3.09e-06	7720	T	A	-0.000185953	0.000605315	0.760001	462933
family.Streptococcaceae.id.1850	rs77968078	1	240441766	0.0012559	19.5123	G	A	-0.0993013	0.0224788	7.93e-06	15519	G	A	-0.000855786	0.000608087	0.16	462933
family.Streptococcaceae.id.1850	rs7916711	10	28588269	0.00127707	19.8365	A	G	0.0959639	0.021545	6.33e-06	15515	A	G	-0.000693347	0.000624477	0.27	462933
family.Streptococcaceae.id.1850	rs957755	7	46778653	0.00121751	20.2658	T	G	-0.0642449	0.0142702	7.42e-06	16627	T	G	-0.000102983	0.000377198	0.780001	462933
family.Streptococcaceae.id.1850	rs9903102	17	80576624	0.00121524	20.2232	C	A	-0.0693015	0.0154096	4.92e-06	16623	C	A	-0.00043557	0.000417183	0.3	462933
family.Veillonellaceae.id.2172	rs111810795	14	102897930	0.00147548	23.056	C	T	-0.0867108	0.0180573	1.73e-06	15605	C	T	0.000360899	0.000470752	0.44	462933
family.Veillonellaceae.id.2172	rs114889439	13	61597625	0.00673516	22.1462	A	G	-0.253809	0.0539169	6.19e-06	3268	A	G	-0.00120938	0.000768532	0.12	462933
family.Veillonellaceae.id.2172	rs11700976	21	35576123	0.00122419	19.5731	C	A	0.0503337	0.0113763	9.25e-06	15971	C	A	5.08991e-05	0.000292685	0.86	462933
family.Veillonellaceae.id.2172	rs12186441	5	132646303	0.00399649	21.0015	G	A	0.208096	0.0453999	4.53e-06	5236	G	A	-4.98982e-05	0.000662712	0.94	462933
family.Veillonellaceae.id.2172	rs12668619	7	21637810	0.00138141	22.0902	A	G	0.055301	0.0117654	2.57e-06	15971	A	G	-0.000552012	0.000303069	0.0690001	462933
family.Veillonellaceae.id.2172	rs12741784	1	50088819	0.00170822	27.1473	C	T	-0.0621452	0.0119266	1.28e-07	15867	C	T	0.000409455	0.000301622	0.17	462933
family.Veillonellaceae.id.2172	rs1442060	4	46366067	0.00131379	21.0141	G	A	-0.0514024	0.0112125	4.51e-06	15976	G	A	-3.07691e-05	0.000295152	0.92	462933
family.Veillonellaceae.id.2172	rs1447205	8	41231597	0.00126748	20.266	G	C	-0.0520689	0.0115656	7.35e-06	15971	G	C	-0.000117882	0.000298744	0.69	462933
family.Veillonellaceae.id.2172	rs1693340	18	30208691	0.00133617	20.1443	T	C	0.0818934	0.018245	9.25e-06	15058	T	C	-0.00119221	0.000451122	0.00819993	462933
family.Veillonellaceae.id.2172	rs2175069	4	23317124	0.00131412	21.0194	A	G	-0.0526752	0.0114886	4.64e-06	15976	A	G	-0.000471823	0.000299889	0.12	462933
family.Veillonellaceae.id.2172	rs2561116	5	38348199	0.00124783	19.9578	T	G	-0.083617	0.0187159	7.89e-06	15976	T	G	-0.000354023	0.000484263	0.46	462933
family.Veillonellaceae.id.2172	rs2585520	13	78785141	0.00131348	20.3844	G	T	-0.0904972	0.0200428	5.27e-06	15501	G	T	0.000506338	0.000507087	0.32	462933
family.Veillonellaceae.id.2172	rs4263802	8	138319508	0.00122843	19.647	G	A	0.050942	0.0114921	7.45e-06	15976	G	A	-0.00013383	0.000296987	0.649999	462933
family.Veillonellaceae.id.2172	rs4461038	15	78546996	0.00134915	21.5764	A	G	-0.0554965	0.0119467	3.73e-06	15973	A	G	-8.41513e-05	0.000303273	0.780001	462933
family.Veillonellaceae.id.2172	rs4797169	18	462180	0.00131233	20.9881	T	C	0.0587799	0.0128297	4.49e-06	15974	T	C	-0.000181049	0.000339666	0.59	462933
family.Veillonellaceae.id.2172	rs61264131	6	139188534	0.0061376	18.9773	A	C	0.202367	0.0464388	6.75e-06	3075	A	C	-0.00148813	0.000761782	0.051	462933
family.Veillonellaceae.id.2172	rs6692542	1	244391618	0.00127666	20.4195	A	G	0.0534397	0.0118254	8.68e-06	15976	A	G	7.42147e-05	0.000304675	0.81	462933
family.Veillonellaceae.id.2172	rs6909981	6	75534152	0.00126891	20.2953	C	T	-0.0638697	0.0141765	5.48e-06	15976	C	T	-0.000292564	0.000355332	0.41	462933
family.Veillonellaceae.id.2172	rs75768969	13	101617913	0.00125858	20.1287	C	G	-0.0703773	0.0156855	7.19e-06	15975	C	G	0.000237329	0.000401839	0.55	462933
family.Veillonellaceae.id.2172	rs79535861	13	38326692	0.00156757	23.643	A	C	0.100666	0.0207016	1.58e-06	15061	A	C	-0.000756932	0.000504154	0.13	462933
family.Veillonellaceae.id.2172	rs9345168	6	92380922	0.00126326	20.2049	C	A	0.0509102	0.0113253	8.49e-06	15976	C	A	0.000100941	0.000291729	0.73	462933
family.Verrucomicrobiaceae.id.4036	rs11184341	1	105422565	0.00178603	21.2238	G	C	0.0655301	0.014223	4.14e-06	11864	G	C	0.000634765	0.000327208	0.0519996	462933
family.Verrucomicrobiaceae.id.4036	rs111862613	12	130309670	0.00182569	21.2515	T	C	0.0907065	0.0196746	3.73e-06	11621	T	C	-0.0005328	0.000393352	0.18	462933
family.Verrucomicrobiaceae.id.4036	rs117107102	18	49473635	0.00450094	22.4844	A	G	0.204683	0.0431573	2.92e-06	4975	A	G	-0.000409895	0.000734515	0.58	462933
family.Verrucomicrobiaceae.id.4036	rs11729256	4	95027272	0.00209725	24.9235	T	C	0.0749798	0.0150177	6.73e-07	11861	T	C	-0.000165957	0.000332862	0.62	462933
family.Verrucomicrobiaceae.id.4036	rs12908520	15	97570657	0.00188075	22.3496	G	A	0.0619104	0.0130946	2.15e-06	11863	G	A	-1.21615e-05	0.000293999	0.97	462933
family.Verrucomicrobiaceae.id.4036	rs2602429	16	81063149	0.001945	22.7775	C	T	0.0745516	0.0156195	2.7e-06	11690	C	T	-0.000115881	0.00035495	0.74	462933
family.Verrucomicrobiaceae.id.4036	rs4242783	10	5064327	0.00185278	21.6955	G	A	0.0687992	0.0147694	2.75e-06	11690	G	A	-0.00032449	0.000331886	0.33	462933
family.Verrucomicrobiaceae.id.4036	rs4936098	11	130280667	0.00191696	22.7711	A	G	0.0648691	0.0135928	1.13e-06	11858	A	G	-7.86344e-05	0.000302425	0.79	462933
family.Verrucomicrobiaceae.id.4036	rs61779207	1	41074472	0.00176195	20.4553	G	A	-0.0758811	0.0167762	6.63e-06	11591	G	A	-0.000501779	0.00037875	0.19	462933
family.Verrucomicrobiaceae.id.4036	rs74542928	4	100544188	0.00200131	22.4877	T	C	0.112124	0.0236422	1.65e-06	11216	T	C	0.000354396	0.000487268	0.47	462933
family.Verrucomicrobiaceae.id.4036	rs9349825	6	56341481	0.00192904	22.9149	A	G	-0.0704354	0.0147128	2.51e-06	11858	A	G	0.000190809	0.000331105	0.56	462933
family.Verrucomicrobiaceae.id.4036	rs941682	20	31867840	0.00163132	19.2925	G	A	-0.0631526	0.0143767	9.58e-06	11809	G	A	-0.000828098	0.000326353	0.0109999	462933
family.Victivallaceae.id.2255	rs11671100	19	711637	0.00625606	20.9575	A	C	-0.160034	0.0349472	4.08e-06	3331	A	C	0.000473848	0.000378357	0.21	462933
family.Victivallaceae.id.2255	rs11764871	7	146808977	0.00623912	24.5293	G	T	0.127099	0.025656	7.49e-07	3909	G	T	0.000179097	0.000320664	0.58	462933
family.Victivallaceae.id.2255	rs2546105	5	94692439	0.00615589	24.2496	A	T	0.126643	0.0257111	1.03e-06	3917	A	T	2.60461e-05	0.000323514	0.94	462933
family.Victivallaceae.id.2255	rs2944282	7	57589803	0.00652505	23.3358	T	C	-0.124197	0.0257026	1.57e-06	3555	T	C	-0.000767098	0.000318765	0.016	462933
family.Victivallaceae.id.2255	rs34962571	12	131103256	0.00612928	19.9505	A	C	-0.186945	0.0418412	6.25e-06	3237	A	C	-0.000351749	0.000503704	0.48	462933
family.Victivallaceae.id.2255	rs4396289	11	9316730	0.00712739	28.0753	C	T	-0.152918	0.0288525	1.54e-07	3913	C	T	-0.000303429	0.000386954	0.43	462933
family.Victivallaceae.id.2255	rs61702987	2	31211657	0.00598591	23.5097	T	C	0.145501	0.0300007	3.08e-06	3906	T	C	0.000176696	0.000373534	0.64	462933
family.Victivallaceae.id.2255	rs62570196	9	111086170	0.00832655	25.9367	C	T	-0.246101	0.0483077	2.7e-07	3091	C	T	0.000174198	0.000542553	0.75	462933
family.Victivallaceae.id.2255	rs6545794	2	60484909	0.00589336	23.2034	A	G	-0.197786	0.0410495	5.97e-07	3916	A	G	-0.00109897	0.000569446	0.0539995	462933
family.Victivallaceae.id.2255	rs67832247	2	2649472	0.00599482	21.4281	C	T	-0.123489	0.0266695	3.24e-06	3555	C	T	-0.000366045	0.000339908	0.28	462933
family.Victivallaceae.id.2255	rs7077363	10	95286954	0.00556365	21.8756	G	A	0.148942	0.0318366	2.83e-06	3912	G	A	1.21953e-05	0.000395474	0.98	462933
family.Victivallaceae.id.2255	rs7314815	12	102525047	0.00510649	20.0688	G	A	0.101088	0.0225594	6.4e-06	3912	G	A	5.70878e-05	0.000290965	0.84	462933
family.Victivallaceae.id.2255	rs7627405	3	9968555	0.00554134	19.7981	C	T	-0.134158	0.0301427	8.19e-06	3555	C	T	0.000168776	0.000388204	0.66	462933
family.Victivallaceae.id.2255	rs7860510	9	94128796	0.00491258	19.303	G	C	0.164855	0.0375128	9.6e-06	3912	G	C	0.000135339	0.000471905	0.77	462933
genus..Clostridiuminnocuumgroup.id.14397	rs10074000	5	113126539	0.00500366	20.3466	T	C	-0.102648	0.0227508	7e-06	4048	T	C	4.73628e-05	0.000298714	0.87	462933
genus..Clostridiuminnocuumgroup.id.14397	rs10506058	12	30268485	0.00482514	20.1748	A	G	0.0997048	0.0221926	8.92e-06	4163	A	G	0.000348132	0.000296536	0.24	462933
genus..Clostridiuminnocuumgroup.id.14397	rs1942371	18	69274308	0.00534594	21.3321	G	A	-0.157938	0.034187	4.06e-06	3971	G	A	-0.000244421	0.000459984	0.6	462933
genus..Clostridiuminnocuumgroup.id.14397	rs1948423	3	103025517	0.00515834	21.5855	T	A	-0.108859	0.023425	3.49e-06	4165	T	A	5.41899e-05	0.000320651	0.87	462933
genus..Clostridiuminnocuumgroup.id.14397	rs40656	5	9368158	0.00517082	21.0299	C	T	0.142664	0.0311021	8.62e-06	4048	C	T	8.39574e-05	0.000395975	0.83	462933
genus..Clostridiuminnocuumgroup.id.14397	rs4869133	5	95717619	0.00517994	19.4374	G	A	-0.180591	0.0409505	7.24e-06	3735	G	A	5.16215e-05	0.000532913	0.92	462933
genus..Clostridiuminnocuumgroup.id.14397	rs61267978	18	6348227	0.00501918	21.0002	T	C	0.14708	0.0320875	5.59e-06	4165	T	C	0.000602462	0.000429229	0.16	462933
genus..Clostridiuminnocuumgroup.id.14397	rs6577484	1	8419420	0.00509671	19.7536	G	A	0.160425	0.0360857	8.41e-06	3858	G	A	0.000683396	0.00044924	0.13	462933
genus..Clostridiuminnocuumgroup.id.14397	rs6890185	5	71186626	0.00564942	23.6579	T	C	0.113424	0.0233137	1.12e-06	4166	T	C	-0.000264706	0.000309828	0.39	462933
genus..Clostridiuminnocuumgroup.id.14397	rs71564433	6	143718234	0.00508817	21.2853	T	A	-0.126746	0.0274657	7.8e-06	4164	T	A	-7.59579e-05	0.000369737	0.84	462933
genus..Clostridiuminnocuumgroup.id.14397	rs77845139	15	59704208	0.00491436	19.9817	A	G	-0.114993	0.0257186	8.41e-06	4048	A	G	0.000332547	0.000335523	0.32	462933
genus..Eubacteriumbrachygroup.id.11296	rs112617308	10	94185213	0.00551239	22.1662	T	C	-0.170873	0.0362844	2.38e-06	4001	T	C	-0.000224479	0.000488912	0.649999	462933
genus..Eubacteriumbrachygroup.id.11296	rs12151423	2	218237281	0.00512893	19.8585	A	G	0.101329	0.0227324	9.27e-06	3854	A	G	-3.61257e-05	0.000292995	0.9	462933
genus..Eubacteriumbrachygroup.id.11296	rs13139592	4	144665178	0.00515558	19.9	T	C	-0.145997	0.0327192	7.97e-06	3842	T	C	0.000360511	0.000405217	0.37	462933
genus..Eubacteriumbrachygroup.id.11296	rs1384962	14	23060552	0.00512557	20.6028	A	G	0.120888	0.0266264	6.99e-06	4001	A	G	-0.000354691	0.000349981	0.31	462933
genus..Eubacteriumbrachygroup.id.11296	rs2913110	10	22892667	0.00522224	20.9934	C	T	0.105143	0.022942	4.56e-06	4001	C	T	0.000263088	0.000295637	0.37	462933
genus..Eubacteriumbrachygroup.id.11296	rs4862235	4	184628931	0.00535945	21.5425	G	A	0.104806	0.0225751	3.73e-06	4000	G	A	0.000501203	0.00029548	0.0899995	462933
genus..Eubacteriumbrachygroup.id.11296	rs62348779	5	17460096	0.00562938	21.6543	T	C	-0.201481	0.043286	3.78e-06	3827	T	C	-0.000257039	0.000559168	0.649999	462933
genus..Eubacteriumbrachygroup.id.11296	rs6591893	11	80236833	0.00504586	20.2706	G	A	0.108225	0.0240319	7.34e-06	3999	G	A	-0.000325457	0.000315171	0.3	462933
genus..Eubacteriumbrachygroup.id.11296	rs720439	22	48190598	0.00493551	19.835	A	G	-0.111927	0.0251252	7.03e-06	4001	A	G	0.000530183	0.00033655	0.12	462933
genus..Eubacteriumbrachygroup.id.11296	rs73199919	4	6856564	0.00655522	19.835	T	C	-0.236717	0.0531335	8.16e-06	3008	T	C	-0.000397141	0.00058613	0.5	462933
genus..Eubacteriumbrachygroup.id.11296	rs9613196	22	26922534	0.00674439	20.3841	T	A	-0.238718	0.0528561	4.99e-06	3004	T	A	-0.000259145	0.00059393	0.66	462933
genus..Eubacteriumcoprostanoligenesgroup.id.11375	rs1020520	7	33603146	0.00113549	19.7448	T	G	-0.0590705	0.0132929	8.89e-06	17371	T	G	0.000172465	0.000368612	0.64	462933
genus..Eubacteriumcoprostanoligenesgroup.id.11375	rs10444197	10	2215931	0.00114236	19.8745	A	G	-0.0505823	0.0113455	5.98e-06	17380	A	G	-4.32768e-06	0.000310187	0.99	462933
genus..Eubacteriumcoprostanoligenesgroup.id.11375	rs11052069	12	32713919	0.00112851	19.6333	T	C	0.0477832	0.0107833	9.38e-06	17380	T	C	0.000109907	0.000293068	0.709999	462933
genus..Eubacteriumcoprostanoligenesgroup.id.11375	rs115325767	1	200638489	0.00121268	20.0978	G	C	0.0783322	0.0174719	2.62e-06	16555	G	C	-0.00040742	0.000480315	0.4	462933
genus..Eubacteriumcoprostanoligenesgroup.id.11375	rs11720857	3	113794507	0.00112251	19.057	C	T	0.0630776	0.0144485	9.26e-06	16960	C	T	5.13751e-05	0.000385167	0.89	462933
genus..Eubacteriumcoprostanoligenesgroup.id.11375	rs12906958	15	36911598	0.00121537	21.1464	C	T	-0.0533159	0.0115935	4.35e-06	17380	C	T	-0.000329246	0.000314186	0.29	462933
genus..Eubacteriumcoprostanoligenesgroup.id.11375	rs17159861	7	31085162	0.00187528	32.6499	C	T	0.0962228	0.0168388	1.04e-08	17380	C	T	0.00101795	0.000453202	0.025	462933
genus..Eubacteriumcoprostanoligenesgroup.id.11375	rs2644213	10	84506096	0.00113517	19.7494	G	A	0.0538845	0.0121245	9.86e-06	17380	G	A	-0.000243026	0.00034342	0.48	462933
genus..Eubacteriumcoprostanoligenesgroup.id.11375	rs4076415	15	86440997	0.00128464	21.8129	T	G	0.0515152	0.0110294	1.99e-06	16960	T	G	0.000461231	0.000298698	0.12	462933
genus..Eubacteriumcoprostanoligenesgroup.id.11375	rs4717831	7	73306506	0.00121113	20.4348	A	T	0.0786783	0.0174038	9.18e-06	16854	A	T	-0.00101289	0.000476547	0.0340001	462933
genus..Eubacteriumcoprostanoligenesgroup.id.11375	rs62024432	15	97869293	0.00115678	19.9996	C	T	-0.0769698	0.0172101	7.5e-06	17271	C	T	8.93112e-05	0.000481105	0.85	462933
genus..Eubacteriumcoprostanoligenesgroup.id.11375	rs6762473	3	127139574	0.00123871	21.5493	C	A	0.0521584	0.0112353	4.26e-06	17377	C	A	-0.000187166	0.000306246	0.54	462933
genus..Eubacteriumcoprostanoligenesgroup.id.11375	rs76898927	3	81595477	0.00174663	21.3374	G	A	0.123055	0.0266375	4.79e-06	12197	G	A	0.00108729	0.000689287	0.11	462933
genus..Eubacteriumcoprostanoligenesgroup.id.11375	rs79895140	2	50797401	0.00127623	20.6208	T	C	-0.0641017	0.0141153	8.62e-06	16139	T	C	-0.000249151	0.000376954	0.51	462933
genus..Eubacteriumcoprostanoligenesgroup.id.11375	rs9648214	7	16380806	0.0014616	25.4354	T	C	-0.0828719	0.016431	2.52e-07	17379	T	C	-0.000136787	0.000434831	0.75	462933
genus..Eubacteriumeligensgroup.id.14372	rs12719051	7	51365152	0.00151237	19.3831	A	G	0.0916626	0.0208183	7.12e-06	12799	A	G	0.00129404	0.000467832	0.00569994	462933
genus..Eubacteriumeligensgroup.id.14372	rs158115	14	77619186	0.00156839	23.0539	G	C	0.0915271	0.0190611	9.74e-06	14678	G	C	-0.000337685	0.000513559	0.51	462933
genus..Eubacteriumeligensgroup.id.14372	rs182318	11	31098691	0.00120208	17.7821	G	A	-0.0824941	0.0195615	8.4e-06	14777	G	A	-0.00122852	0.000534893	0.0219999	462933
genus..Eubacteriumeligensgroup.id.14372	rs2200429	13	107563458	0.00135674	20.0514	A	G	-0.0888825	0.0198479	5.3e-06	14761	A	G	-0.000286585	0.000511469	0.58	462933
genus..Eubacteriumeligensgroup.id.14372	rs265534	10	83092007	0.00148832	22.0212	T	G	-0.0563756	0.0120127	2.27e-06	14776	T	G	0.000637233	0.000294318	0.0299999	462933
genus..Eubacteriumeligensgroup.id.14372	rs4583233	16	81820486	0.00190627	27.3595	A	C	0.0670205	0.0128122	2.84e-07	14327	A	C	0.000232133	0.000306216	0.450001	462933
genus..Eubacteriumeligensgroup.id.14372	rs56080211	2	110260993	0.00176835	18.9496	C	T	0.123093	0.0282743	9.14e-06	10699	C	T	0.000301606	0.000602639	0.62	462933
genus..Eubacteriumeligensgroup.id.14372	rs6923695	6	70956815	0.00156784	20.2396	T	G	0.103268	0.0229524	4.87e-06	12891	T	G	-0.000606303	0.00054416	0.27	462933
genus..Eubacteriumeligensgroup.id.14372	rs72839198	2	115197171	0.00347427	17.1669	C	G	0.155659	0.0375612	3.14e-06	4926	C	G	2.63477e-05	0.000674499	0.97	462933
genus..Eubacteriumeligensgroup.id.14372	rs74606150	14	39301409	0.00394309	21.2938	C	G	-0.196454	0.042565	4.25e-06	5381	C	G	-0.00121019	0.00071042	0.0879995	462933
genus..Eubacteriumfissicatenagroup.id.14373	rs10147907	14	89484373	0.0049124	18.9123	T	G	0.172263	0.039601	8.27e-06	3833	T	G	0.000558261	0.000520301	0.28	462933
genus..Eubacteriumfissicatenagroup.id.14373	rs11818408	10	96758467	0.00552041	19.9172	G	A	0.10585	0.0237114	8.2e-06	3590	G	A	0.000349724	0.000294387	0.23	462933
genus..Eubacteriumfissicatenagroup.id.14373	rs11876297	18	45753272	0.00637228	21.7662	T	C	0.131469	0.0281712	2.67e-06	3396	T	C	-3.36878e-06	0.000344687	0.99	462933
genus..Eubacteriumfissicatenagroup.id.14373	rs151257695	7	73043561	0.0058801	21.2049	A	G	0.20951	0.0454847	3.1e-06	3587	A	G	-0.000163601	0.000563983	0.77	462933
genus..Eubacteriumfissicatenagroup.id.14373	rs1768152	3	39604954	0.005392	19.4514	T	C	0.139489	0.0316186	8.7e-06	3590	T	C	-0.00030713	0.000413813	0.46	462933
genus..Eubacteriumfissicatenagroup.id.14373	rs2733072	8	5433699	0.00598126	23.0521	G	A	0.109644	0.0228306	1.49e-06	3833	G	A	-0.000539914	0.000298611	0.0710003	462933
genus..Eubacteriumfissicatenagroup.id.14373	rs3771393	2	71145246	0.00630853	24.0611	C	T	0.130842	0.0266671	7.38e-07	3792	C	T	0.00032199	0.00032949	0.33	462933
genus..Eubacteriumfissicatenagroup.id.14373	rs6934739	6	39940437	0.00504941	19.4323	A	G	0.111463	0.0252788	9.75e-06	3831	A	G	-0.000446249	0.000323045	0.17	462933
genus..Eubacteriumfissicatenagroup.id.14373	rs7104872	11	115165111	0.00585437	22.5366	G	A	0.138612	0.0291906	2.73e-06	3829	G	A	0.000425407	0.000375132	0.26	462933
genus..Eubacteriumhalliigroup.id.11338	rs10501370	11	58040621	0.00151376	20.9549	C	T	-0.115589	0.0252489	5.42e-06	13824	C	T	-0.000757173	0.000691389	0.27	462933
genus..Eubacteriumhalliigroup.id.11338	rs10798999	1	34308917	0.00135867	22.5288	C	T	0.0601661	0.0126752	2.61e-06	16561	C	T	-0.000283462	0.000352606	0.42	462933
genus..Eubacteriumhalliigroup.id.11338	rs10808115	7	100635375	0.00127117	21.0825	A	C	-0.0504747	0.0109922	4.42e-06	16566	A	C	0.000365012	0.000291886	0.21	462933
genus..Eubacteriumhalliigroup.id.11338	rs117748144	11	11771637	0.00178637	19.4329	T	C	-0.126582	0.028712	7.86e-06	10861	T	C	0.000706245	0.00064438	0.27	462933
genus..Eubacteriumhalliigroup.id.11338	rs13116360	4	111885431	0.00259868	26.8908	T	C	0.154124	0.0297185	2.94e-07	10323	T	C	0.000284626	0.000631638	0.649999	462933
genus..Eubacteriumhalliigroup.id.11338	rs138531890	3	195238086	0.00248455	19.1986	A	G	0.153138	0.0349456	5.43e-06	7710	A	G	0.000818967	0.000649622	0.21	462933
genus..Eubacteriumhalliigroup.id.11338	rs17074066	4	183709536	0.00116892	18.4929	T	C	-0.0813986	0.0189272	9.35e-06	15804	T	C	0.000330687	0.000512771	0.52	462933
genus..Eubacteriumhalliigroup.id.11338	rs17474256	1	104524676	0.001171	19.2949	G	A	0.0810805	0.0184573	9.45e-06	16460	G	A	0.00026526	0.000491273	0.59	462933
genus..Eubacteriumhalliigroup.id.11338	rs281379	19	49214274	0.00122835	19.8352	A	G	-0.0499523	0.0112153	9.33e-06	16130	A	G	0.000671488	0.000291062	0.021	462933
genus..Eubacteriumhalliigroup.id.11338	rs28584818	3	64664456	0.00198265	22.0372	A	G	0.126115	0.0268627	4.43e-06	11095	A	G	-0.000348313	0.000650862	0.59	462933
genus..Eubacteriumhalliigroup.id.11338	rs60254196	7	148856720	0.00134344	21.8415	A	G	-0.0522832	0.0111865	2.7e-06	16238	A	G	-5.96377e-05	0.000292528	0.84	462933
genus..Eubacteriumhalliigroup.id.11338	rs630939	18	48384463	0.00121826	19.8037	C	T	-0.0508914	0.0114352	9.16e-06	16238	C	T	0.000226857	0.000296197	0.44	462933
genus..Eubacteriumhalliigroup.id.11338	rs6550770	3	23663416	0.00463956	19.9359	T	C	-0.198087	0.0443545	4.82e-06	4279	T	C	-0.00107721	0.000647752	0.0959997	462933
genus..Eubacteriumhalliigroup.id.11338	rs78056098	11	123789877	0.0011994	19.8931	G	T	-0.0507411	0.0113758	8.29e-06	16568	G	T	-0.000262822	0.000304401	0.39	462933
genus..Eubacteriumhalliigroup.id.11338	rs949971	3	110283389	0.00130496	21.6436	T	G	-0.0540164	0.0116101	3.29e-06	16566	T	G	0.000488903	0.000301027	0.1	462933
genus..Eubacteriumnodatumgroup.id.11297	rs10263623	7	64894137	0.0062674	19.4127	C	T	0.193496	0.0439023	8.91e-06	3080	C	T	-0.000408561	0.000475434	0.39	462933
genus..Eubacteriumnodatumgroup.id.11297	rs10458299	7	135052348	0.00608115	20.0009	T	C	-0.187753	0.041969	8.37e-06	3271	T	C	0.00109369	0.000518784	0.0350002	462933
genus..Eubacteriumnodatumgroup.id.11297	rs11006576	10	61322015	0.00605327	20.0548	A	G	-0.110167	0.024593	7.99e-06	3295	A	G	-0.000201749	0.000294193	0.49	462933
genus..Eubacteriumnodatumgroup.id.11297	rs113893692	9	28245518	0.00654155	21.0247	C	T	-0.185107	0.0403573	5.76e-06	3195	C	T	0.000493327	0.000454616	0.28	462933
genus..Eubacteriumnodatumgroup.id.11297	rs34297067	14	52185888	0.00907593	29.941	A	G	-0.186907	0.0341475	6.6e-08	3271	A	G	0.000394501	0.000405314	0.33	462933
genus..Eubacteriumnodatumgroup.id.11297	rs61841040	10	9659749	0.00666479	22.0944	G	T	0.160621	0.0341609	3.56e-06	3295	G	T	0.000402362	0.000404552	0.32	462933
genus..Eubacteriumnodatumgroup.id.11297	rs6818880	4	94712747	0.00604942	20.0176	A	G	-0.110081	0.0245964	7.83e-06	3291	A	G	0.000111833	0.000294358	0.7	462933
genus..Eubacteriumnodatumgroup.id.11297	rs77910827	9	96597985	0.00722551	23.7921	C	T	0.201788	0.0413568	9.05e-07	3271	C	T	-0.00118558	0.000488625	0.015	462933
genus..Eubacteriumnodatumgroup.id.11297	rs7827125	8	4954912	0.00612996	20.3043	C	T	0.1223	0.0271331	7.17e-06	3294	C	T	-4.4469e-06	0.000325352	0.99	462933
genus..Eubacteriumnodatumgroup.id.11297	rs7880204	1	171060821	0.00626459	20.753	T	C	-0.125454	0.0275303	6.84e-06	3294	T	C	-0.000171487	0.000329954	0.6	462933
genus..Eubacteriumnodatumgroup.id.11297	rs9425984	1	34529736	0.00598852	19.833	T	C	-0.130234	0.0292347	7.21e-06	3294	T	C	8.45605e-05	0.000344679	0.81	462933
genus..Eubacteriumoxidoreducensgroup.id.11339	rs12129908	1	195064019	0.0037584	20.2776	C	A	0.0893272	0.0198333	5.8e-06	5377	C	A	0.000300424	0.000294845	0.31	462933
genus..Eubacteriumoxidoreducensgroup.id.11339	rs12423772	12	94515340	0.00427298	22.8255	G	T	0.14098	0.0295029	2.63e-06	5321	G	T	-0.000395005	0.00047758	0.41	462933
genus..Eubacteriumoxidoreducensgroup.id.11339	rs1425962	4	187905399	0.00381932	20.3928	G	C	0.0906104	0.0200612	7.32e-06	5321	G	C	0.000317262	0.00031898	0.32	462933
genus..Eubacteriumoxidoreducensgroup.id.11339	rs2973294	4	37526679	0.00413511	22.3227	G	T	0.0923559	0.0195439	2.39e-06	5378	G	T	-9.33246e-05	0.00029267	0.75	462933
genus..Eubacteriumoxidoreducensgroup.id.11339	rs34561138	16	86480355	0.0052486	22.076	G	A	0.216145	0.045992	2.51e-06	4186	G	A	-0.000261305	0.000582813	0.649999	462933
genus..Eubacteriumoxidoreducensgroup.id.11339	rs440215	5	106882394	0.00422464	22.8038	C	T	0.0932766	0.0195294	1.65e-06	5377	C	T	-0.000327073	0.000293321	0.26	462933
genus..Eubacteriumruminantiumgroup.id.11340	rs10131724	14	52219066	0.00456081	23.2247	A	C	-0.199832	0.0414577	2.39e-06	5071	A	C	-0.000452006	0.000621463	0.47	462933
genus..Eubacteriumruminantiumgroup.id.11340	rs10923018	1	88523399	0.0026262	20.3724	G	A	0.0726438	0.0160924	6.8e-06	7739	G	A	-0.0004263	0.000293132	0.15	462933
genus..Eubacteriumruminantiumgroup.id.11340	rs112375806	22	48749548	0.00332233	23.7372	T	A	0.143141	0.0293757	5.82e-06	7123	T	A	0.000306193	0.000502579	0.54	462933
genus..Eubacteriumruminantiumgroup.id.11340	rs11637981	15	61289622	0.00267913	20.7277	G	T	-0.073258	0.0160888	5.44e-06	7718	G	T	0.00032076	0.000294146	0.28	462933
genus..Eubacteriumruminantiumgroup.id.11340	rs13025464	2	201610645	0.00261042	20.247	T	C	-0.0737077	0.0163786	6.97e-06	7738	T	C	-7.42168e-05	0.000301737	0.81	462933
genus..Eubacteriumruminantiumgroup.id.11340	rs139749	22	25303055	0.00330046	24.2129	C	T	-0.0845439	0.0171791	8.59e-07	7314	C	T	-0.000318176	0.000310082	0.3	462933
genus..Eubacteriumruminantiumgroup.id.11340	rs16891896	5	33897589	0.00419586	20.0185	G	A	-0.174787	0.0390573	2.38e-06	4753	G	A	-0.000680773	0.000666587	0.31	462933
genus..Eubacteriumruminantiumgroup.id.11340	rs17519472	12	30360954	0.00274569	21.222	C	T	0.107804	0.0233984	4.7e-06	7710	C	T	0.000268617	0.000416685	0.52	462933
genus..Eubacteriumruminantiumgroup.id.11340	rs209813	6	11953633	0.00263148	19.1602	G	A	-0.103488	0.0236391	9.23e-06	7264	G	A	0.00121352	0.00044609	0.00649995	462933
genus..Eubacteriumruminantiumgroup.id.11340	rs2116427	5	121182996	0.00321784	24.9768	A	G	0.0911461	0.0182353	4.67e-07	7739	A	G	0.000483274	0.000338033	0.15	462933
genus..Eubacteriumruminantiumgroup.id.11340	rs2229917	9	130980937	0.00317672	22.4609	A	G	0.153538	0.0323922	2.16e-06	7050	A	G	-0.000442276	0.000591908	0.450001	462933
genus..Eubacteriumruminantiumgroup.id.11340	rs2418654	2	71247578	0.00277984	20.3829	C	T	-0.0748879	0.0165852	6.17e-06	7314	C	T	0.000234033	0.000296599	0.43	462933
genus..Eubacteriumruminantiumgroup.id.11340	rs2817174	1	3044181	0.00260339	20.1193	C	T	-0.0734306	0.0163687	7.87e-06	7710	C	T	-0.00021969	0.000300596	0.46	462933
genus..Eubacteriumruminantiumgroup.id.11340	rs57340348	6	130030114	0.0029052	21.3047	T	C	-0.0979429	0.0212166	4.93e-06	7314	T	C	-0.000463891	0.000374628	0.22	462933
genus..Eubacteriumruminantiumgroup.id.11340	rs606117	9	2539358	0.00292357	21.2903	A	G	0.0833243	0.018056	4.82e-06	7263	A	G	6.63842e-05	0.00031668	0.83	462933
genus..Eubacteriumruminantiumgroup.id.11340	rs6676699	1	197978281	0.00264462	20.4335	G	T	-0.0888124	0.0196447	6.38e-06	7708	G	T	-0.000289539	0.000364411	0.43	462933
genus..Eubacteriumruminantiumgroup.id.11340	rs7000472	8	138626268	0.00274268	21.2785	A	G	-0.0762282	0.016523	4.07e-06	7739	A	G	-0.000269219	0.000299669	0.37	462933
genus..Eubacteriumruminantiumgroup.id.11340	rs72836424	10	129037453	0.00294777	21.6178	C	T	-0.139825	0.030069	2.62e-06	7314	C	T	4.9992e-05	0.000517957	0.92	462933
genus..Eubacteriumruminantiumgroup.id.11340	rs73139629	12	63306003	0.00293843	21.5491	A	C	-0.115098	0.0247909	5.36e-06	7314	A	C	0.000373156	0.0004543	0.41	462933
genus..Eubacteriumventriosumgroup.id.11341	rs11617697	13	98785900	0.00217667	25.0754	A	G	-0.143349	0.0286241	7.22e-07	11497	A	G	0.000327546	0.000672639	0.630001	462933
genus..Eubacteriumventriosumgroup.id.11341	rs12964517	18	22460785	0.00147755	22.6207	G	A	0.0587198	0.0123453	2.07e-06	15289	G	A	5.16477e-05	0.0003114	0.87	462933
genus..Eubacteriumventriosumgroup.id.11341	rs13082419	3	107736434	0.00135399	19.6581	C	T	-0.0715522	0.016137	9.56e-06	14501	C	T	-0.000787925	0.000401498	0.05	462933
genus..Eubacteriumventriosumgroup.id.11341	rs16884680	8	114445055	0.00145701	22.3059	G	T	-0.0906428	0.0191909	1.74e-06	15289	G	T	0.000431856	0.000498213	0.39	462933
genus..Eubacteriumventriosumgroup.id.11341	rs35179274	14	51960625	0.00135243	20.6999	C	T	-0.0627263	0.013786	5.76e-06	15287	C	T	3.81574e-05	0.000344564	0.91	462933
genus..Eubacteriumventriosumgroup.id.11341	rs3809430	14	44975510	0.00139962	21.4232	T	C	-0.0548171	0.0118426	3.55e-06	15287	T	C	-0.000208795	0.000299578	0.49	462933
genus..Eubacteriumventriosumgroup.id.11341	rs57199565	3	190223732	0.0015998	23.8929	T	C	0.0783394	0.0160257	7.97e-07	14913	T	C	-0.000296396	0.000411787	0.47	462933
genus..Eubacteriumventriosumgroup.id.11341	rs6048195	20	2308307	0.00180324	26.803	A	T	-0.0603594	0.011658	2.5e-07	14839	A	T	0.000397183	0.000324383	0.22	462933
genus..Eubacteriumventriosumgroup.id.11341	rs66746423	1	109398264	0.00142131	20.7465	C	T	0.0751501	0.0164978	6.11e-06	14578	C	T	-0.000190684	0.000414019	0.649999	462933
genus..Eubacteriumventriosumgroup.id.11341	rs66830358	3	171895485	0.00134522	20.0857	T	A	0.0528752	0.0117972	6.87e-06	14913	T	A	-0.000625185	0.000297221	0.0350002	462933
genus..Eubacteriumventriosumgroup.id.11341	rs6704822	2	203661779	0.0012843	19.6583	A	G	0.0739179	0.0166705	6.62e-06	15289	A	G	-0.000336191	0.000420337	0.42	462933
genus..Eubacteriumventriosumgroup.id.11341	rs72783037	16	60348381	0.00137273	21.0097	C	A	0.0658926	0.0143747	6.55e-06	15286	C	A	1.6463e-06	0.000363423	1	462933
genus..Eubacteriumventriosumgroup.id.11341	rs73615400	20	50140919	0.00161122	24.4398	T	C	-0.0956303	0.0193428	9.54e-07	15146	T	C	-0.000836204	0.000517115	0.11	462933
genus..Eubacteriumventriosumgroup.id.11341	rs73849225	4	126371814	0.00129578	18.9053	T	C	0.0975711	0.0224388	5.21e-06	14573	T	C	-0.00101761	0.000589974	0.0850002	462933
genus..Eubacteriumventriosumgroup.id.11341	rs78250280	1	147291928	0.00139999	20.7951	G	A	0.0749762	0.0164404	3.36e-06	14835	G	A	0.000649222	0.000403828	0.11	462933
genus..Eubacteriumventriosumgroup.id.11341	rs876734	12	52423996	0.00145919	21.7898	C	T	-0.0618696	0.0132532	2.89e-06	14913	C	T	-0.000648902	0.000338848	0.0549997	462933
genus..Eubacteriumventriosumgroup.id.11341	rs9316536	13	51938576	0.00130059	19.9081	T	G	-0.0817111	0.0183121	7.84e-06	15289	T	G	-0.000462318	0.000510961	0.37	462933
genus..Eubacteriumxylanophilumgroup.id.14375	rs10140184	14	73181783	0.00161834	20.9558	A	C	0.0576795	0.012599	4.96e-06	12930	A	C	4.17537e-05	0.00031134	0.89	462933
genus..Eubacteriumxylanophilumgroup.id.14375	rs10917203	1	22627266	0.00169074	21.8949	A	C	0.0612633	0.0130917	3.15e-06	12930	A	C	1.26972e-06	0.000310848	1	462933
genus..Eubacteriumxylanophilumgroup.id.14375	rs112176119	16	73696771	0.00174397	21.3084	C	T	-0.113455	0.0245762	3.33e-06	12199	C	T	3.54127e-05	0.000543527	0.95	462933
genus..Eubacteriumxylanophilumgroup.id.14375	rs12980122	19	8255478	0.00171245	20.6481	C	G	-0.108274	0.0238257	5.02e-06	12039	C	G	0.000564769	0.00051757	0.28	462933
genus..Eubacteriumxylanophilumgroup.id.14375	rs13239072	7	43566344	0.00174019	23.1936	G	A	0.0687427	0.0142728	1.82e-06	13307	G	A	0.000211469	0.000331906	0.52	462933
genus..Eubacteriumxylanophilumgroup.id.14375	rs17830032	20	57995506	0.00279988	26.7437	G	A	-0.160597	0.0310515	2.39e-07	9527	G	A	0.000689377	0.000661346	0.3	462933
genus..Eubacteriumxylanophilumgroup.id.14375	rs1999224	9	130498120	0.00163149	21.7457	G	T	-0.0949051	0.0203503	3.75e-06	13309	G	T	0.00030336	0.00049368	0.54	462933
genus..Eubacteriumxylanophilumgroup.id.14375	rs2012708	16	84790559	0.0015309	20.3983	A	G	0.0573202	0.0126905	6.53e-06	13306	A	G	-3.54146e-05	0.000304731	0.91	462933
genus..Eubacteriumxylanophilumgroup.id.14375	rs2213117	11	131009660	0.00167199	21.5646	T	G	0.0877797	0.0189012	4.21e-06	12878	T	G	-0.00033108	0.000471343	0.48	462933
genus..Eubacteriumxylanophilumgroup.id.14375	rs4654122	1	246780557	0.00150486	20.0554	C	G	0.0553508	0.0123588	7.2e-06	13309	C	G	0.000145018	0.000293406	0.62	462933
genus..Eubacteriumxylanophilumgroup.id.14375	rs75586835	4	87891938	0.00150274	18.8848	A	G	-0.114498	0.0263455	9.39e-06	12550	A	G	-0.00021188	0.000600378	0.719999	462933
genus..Eubacteriumxylanophilumgroup.id.14375	rs79582700	17	66689958	0.00170569	22.6458	C	G	-0.0951677	0.0199969	2.41e-06	13256	C	G	0.000233664	0.000464753	0.62	462933
genus..Ruminococcusgauvreauiigroup.id.11342	rs10931481	2	191954852	0.00163098	21.8582	G	A	0.0610096	0.0130484	3.38e-06	13382	G	A	1.92418e-05	0.000314327	0.95	462933
genus..Ruminococcusgauvreauiigroup.id.11342	rs12079579	1	161880482	0.00154035	20.0308	A	G	0.0955324	0.0213436	5.04e-06	12986	A	G	-0.000574387	0.00051529	0.26	462933
genus..Ruminococcusgauvreauiigroup.id.11342	rs12539819	7	153487396	0.00177901	21.1332	C	T	0.110654	0.0240684	4.49e-06	11860	C	T	-0.000501676	0.000529569	0.34	462933
genus..Ruminococcusgauvreauiigroup.id.11342	rs13188803	5	112627773	0.00159131	20.4522	T	A	0.0709419	0.0156855	7.28e-06	12834	T	A	-8.64906e-05	0.00036092	0.81	462933
genus..Ruminococcusgauvreauiigroup.id.11342	rs1391597	12	61119266	0.001667	22.3417	C	T	0.0590284	0.0124874	1.86e-06	13382	C	T	-3.08468e-06	0.000299161	0.99	462933
genus..Ruminococcusgauvreauiigroup.id.11342	rs2047242	10	29201860	0.00190764	25.5481	A	G	-0.067603	0.0133738	2.46e-07	13369	A	G	8.64464e-05	0.000311025	0.780001	462933
genus..Ruminococcusgauvreauiigroup.id.11342	rs2105937	1	20552072	0.00153982	20.6069	A	G	0.0580215	0.0127806	5.1e-06	13364	A	G	0.000233024	0.000303881	0.44	462933
genus..Ruminococcusgauvreauiigroup.id.11342	rs2166943	8	137090850	0.00157316	21.0742	A	C	0.0566974	0.0123497	5.28e-06	13377	A	C	3.62699e-05	0.000295239	0.9	462933
genus..Ruminococcusgauvreauiigroup.id.11342	rs289410	15	85563483	0.00165405	22.1645	G	A	-0.0654926	0.0139101	2.27e-06	13380	G	A	0.000184113	0.000335188	0.58	462933
genus..Ruminococcusgauvreauiigroup.id.11342	rs431418	5	166419552	0.00152685	20.3182	A	G	-0.094737	0.0210157	5.54e-06	13289	A	G	-0.00024803	0.000486169	0.61	462933
genus..Ruminococcusgauvreauiigroup.id.11342	rs71386687	16	2767894	0.00226412	25.7288	T	G	0.121037	0.02386	2.91e-07	11340	T	G	-0.000779428	0.000564377	0.17	462933
genus..Ruminococcusgauvreauiigroup.id.11342	rs73802842	4	18824860	0.00140732	18.8565	C	A	0.0736808	0.0169665	7.48e-06	13382	C	A	-8.38552e-05	0.000402933	0.84	462933
genus..Ruminococcusgauvreauiigroup.id.11342	rs9870933	3	112372317	0.00181358	24.3098	A	G	0.0621643	0.0126072	8.49e-07	13382	A	G	0.000346674	0.000302231	0.25	462933
genus..Ruminococcusgnavusgroup.id.14376	rs11597105	10	6512581	0.00329667	20.9237	A	G	0.114673	0.0250653	6.95e-06	6328	A	G	-0.000119621	0.000422734	0.780001	462933
genus..Ruminococcusgnavusgroup.id.14376	rs11864644	16	433078	0.00308245	19.2909	T	C	-0.139804	0.0318253	5.01e-06	6241	T	C	0.000148362	0.000514997	0.77	462933
genus..Ruminococcusgnavusgroup.id.14376	rs12136548	1	115168097	0.00328146	21.0672	C	T	0.0901946	0.0196476	3.1e-06	6401	C	T	0.000144497	0.000313958	0.649999	462933
genus..Ruminococcusgnavusgroup.id.14376	rs12989336	2	36259341	0.00316213	20.2987	G	A	-0.0846861	0.0187936	7.12e-06	6401	G	A	0.000782319	0.000309623	0.012	462933
genus..Ruminococcusgnavusgroup.id.14376	rs13163520	5	18662686	0.00466688	29.6517	G	A	-0.127377	0.0233883	5.61e-08	6326	G	A	-0.000592542	0.000386481	0.13	462933
genus..Ruminococcusgnavusgroup.id.14376	rs2909242	8	129224680	0.00382663	24.5807	C	A	-0.0909965	0.018351	7.41e-07	6401	C	A	-0.000250638	0.000305948	0.41	462933
genus..Ruminococcusgnavusgroup.id.14376	rs3124783	9	135838591	0.00337581	21.675	A	G	-0.11599	0.0249099	2.67e-06	6401	A	G	-0.000201634	0.000418238	0.630001	462933
genus..Ruminococcusgnavusgroup.id.14376	rs4388134	4	190110710	0.00307982	19.7625	C	T	-0.0904997	0.0203544	9.12e-06	6399	C	T	-0.000309079	0.000347698	0.37	462933
genus..Ruminococcusgnavusgroup.id.14376	rs62167033	2	144700007	0.00419117	21.8522	T	C	0.185289	0.0396295	3.5e-06	5194	T	C	0.000603835	0.000575358	0.29	462933
genus..Ruminococcusgnavusgroup.id.14376	rs78399089	3	146290310	0.00327959	19.5514	T	C	0.144445	0.0326618	6.63e-06	5944	T	C	0.00113646	0.000531934	0.0329997	462933
genus..Ruminococcusgnavusgroup.id.14376	rs934940	2	122096018	0.00330713	20.9273	A	C	-0.105045	0.0229588	2.74e-06	6309	A	C	0.000334149	0.00038714	0.39	462933
genus..Ruminococcusgnavusgroup.id.14376	rs9872758	3	66701616	0.00359956	23.106	T	C	0.0849233	0.0176643	1.66e-06	6398	T	C	0.000190616	0.00029045	0.51	462933
genus..Ruminococcustorquesgroup.id.14377	rs10967781	9	27225258	0.00112822	20.0927	C	A	0.0507994	0.0113322	8.37e-06	17791	C	A	-0.000489762	0.000306828	0.11	462933
genus..Ruminococcustorquesgroup.id.14377	rs12434631	14	26130404	0.00136454	23.7084	A	G	0.074697	0.0153401	2.77e-06	17353	A	G	0.00062331	0.000413976	0.13	462933
genus..Ruminococcustorquesgroup.id.14377	rs13154778	5	56952803	0.00106192	18.9149	T	A	0.0563358	0.0129526	7.16e-06	17795	T	A	0.00020576	0.000368577	0.58	462933
genus..Ruminococcustorquesgroup.id.14377	rs1475330	6	67262102	0.00112906	19.6125	T	C	0.0523492	0.01182	8.13e-06	17353	T	C	0.000397711	0.000323438	0.22	462933
genus..Ruminococcustorquesgroup.id.14377	rs1972694	15	25326425	0.00115113	19.9963	T	A	-0.0614094	0.0137321	8.93e-06	17353	T	A	-0.000268222	0.000376247	0.48	462933
genus..Ruminococcustorquesgroup.id.14377	rs35866622	19	49218060	0.00181138	31.2812	T	C	-0.0612024	0.0109421	2.21e-08	17240	T	C	0.000585637	0.000291819	0.0449997	462933
genus..Ruminococcustorquesgroup.id.14377	rs4073731	11	132663147	0.0011796	21.0111	T	C	0.0651948	0.0142221	4.05e-06	17793	T	C	-0.000170161	0.000407677	0.68	462933
genus..Ruminococcustorquesgroup.id.14377	rs73130967	7	54781314	0.00123071	20.9589	A	T	0.0770375	0.0168264	3.71e-06	17011	A	T	0.0013406	0.000436334	0.0021	462933
genus..Ruminococcustorquesgroup.id.14377	rs77034621	8	76769843	0.00237086	20.3547	T	G	-0.151553	0.0335878	6.07e-06	8567	T	G	0.000824259	0.000636811	0.2	462933
genus..Ruminococcustorquesgroup.id.14377	rs773123	12	56494998	0.00131871	22.4595	T	A	0.0824005	0.0173862	1.59e-06	17011	T	A	-0.000202087	0.00045003	0.649999	462933
genus..Ruminococcustorquesgroup.id.14377	rs8080469	17	14532347	0.0011796	21.0169	G	A	0.0490727	0.0107036	3.5e-06	17798	G	A	-0.00106063	0.000291826	0.000280001	462933
genus..Ruminococcustorquesgroup.id.14377	rs8141465	22	21358653	0.00112422	20.0212	A	G	0.0480778	0.0107442	9.65e-06	17791	A	G	-0.000296308	0.000291401	0.31	462933
genus.Actinomyces.id.423	rs10787984	10	121356829	0.00260606	19.5077	G	C	0.094316	0.0213513	9.62e-06	7468	G	C	0.000393322	0.000374161	0.29	462933
genus.Actinomyces.id.423	rs2715439	15	99492313	0.00274061	20.5177	C	T	0.0746684	0.0164822	6.27e-06	7468	C	T	-0.000626724	0.000292527	0.032	462933
genus.Actinomyces.id.423	rs34583783	6	67207371	0.00296881	22.2311	G	T	0.126596	0.0268461	4.49e-06	7468	G	T	6.12609e-05	0.000465516	0.9	462933
genus.Actinomyces.id.423	rs35011108	6	133007480	0.00583798	20.6293	A	G	0.232634	0.0512044	6.34e-06	3515	A	G	0.000457852	0.00068104	0.5	462933
genus.Actinomyces.id.423	rs4073240	6	169224781	0.00267944	20.0585	G	A	0.0749687	0.0167368	7.94e-06	7468	G	A	0.000434903	0.000299239	0.15	462933
genus.Actinomyces.id.423	rs4146653	10	4782841	0.00282533	21.1537	G	A	0.0985224	0.0214182	4.5e-06	7468	G	A	-0.00027644	0.000381187	0.47	462933
genus.Actinomyces.id.423	rs71315246	3	101352439	0.00261307	19.5603	A	G	-0.0969809	0.021925	9.83e-06	7468	A	G	-0.000355821	0.000401241	0.38	462933
genus.Actinomyces.id.423	rs7915461	10	127532121	0.00412048	21.8462	T	C	0.18776	0.0401636	5.92e-06	5282	T	C	0.000144285	0.000611478	0.81	462933
genus.Adlercreutzia.id.812	rs1046175	10	135204950	0.00240403	19.3966	C	G	0.112758	0.0255994	6.36e-06	8051	C	G	-0.000279116	0.000449956	0.54	462933
genus.Adlercreutzia.id.812	rs11604400	11	98386085	0.00234559	19.0557	C	T	-0.102524	0.0234834	9.74e-06	8107	C	T	-0.00078133	0.000458891	0.089	462933
genus.Adlercreutzia.id.812	rs12522517	5	31991834	0.0024335	19.9668	A	T	-0.104884	0.0234695	4.41e-06	8187	A	T	-0.00029962	0.000432163	0.49	462933
genus.Adlercreutzia.id.812	rs13231526	7	48844151	0.00261684	21.1182	C	A	0.143237	0.0311654	4.81e-06	8051	C	A	-8.40275e-05	0.000552099	0.88	462933
genus.Adlercreutzia.id.812	rs2147798	1	201061818	0.00279199	23.0732	C	G	0.0922959	0.0192121	1.4e-06	8243	C	G	-7.87612e-05	0.000373303	0.83	462933
genus.Adlercreutzia.id.812	rs2717140	18	75009770	0.00272795	22.5425	C	T	-0.119225	0.0251081	2.05e-06	8243	C	T	0.000393357	0.000474975	0.41	462933
genus.Adlercreutzia.id.812	rs55719207	3	105355971	0.00236934	19.5721	G	A	-0.0699243	0.0158036	9.61e-06	8243	G	A	0.000274509	0.000293958	0.35	462933
genus.Adlercreutzia.id.812	rs6664405	1	69444163	0.00253378	20.4462	T	C	-0.0953084	0.0210752	5.23e-06	8051	T	C	-4.06412e-05	0.000403442	0.92	462933
genus.Adlercreutzia.id.812	rs7680684	4	171281359	0.00294783	24.3649	C	T	-0.083381	0.0168901	9.77e-07	8243	C	T	-0.000523726	0.000319529	0.1	462933
genus.Adlercreutzia.id.812	rs80078995	5	94059857	0.00286746	23.6987	A	T	-0.11324	0.0232586	1.57e-06	8243	A	T	-0.000951737	0.000447665	0.0340001	462933
genus.Adlercreutzia.id.812	rs9490822	6	123909083	0.00268949	22.2238	C	T	-0.0734512	0.0155789	2.54e-06	8243	C	T	-0.0008037	0.000294579	0.0064	462933
genus.Adlercreutzia.id.812	rs9915817	17	48864179	0.00239754	19.8056	T	C	0.0749219	0.016833	8.22e-06	8243	T	C	0.000128685	0.000314493	0.68	462933
genus.Akkermansia.id.4037	rs11184341	1	105422565	0.00178905	21.2579	G	C	0.0655855	0.0142236	4.06e-06	11863	G	C	0.000634765	0.000327208	0.0519996	462933
genus.Akkermansia.id.4037	rs111862613	12	130309670	0.00184246	21.4452	T	C	0.0911199	0.0196748	3.39e-06	11620	T	C	-0.0005328	0.000393352	0.18	462933
genus.Akkermansia.id.4037	rs117107102	18	49473635	0.00448856	22.4178	A	G	0.204406	0.0431629	3.01e-06	4974	A	G	-0.000409895	0.000734515	0.58	462933
genus.Akkermansia.id.4037	rs11729256	4	95027272	0.00210099	24.966	T	C	0.0750473	0.0150184	6.58e-07	11860	T	C	-0.000165957	0.000332862	0.62	462933
genus.Akkermansia.id.4037	rs12908520	15	97570657	0.0018723	22.2471	G	A	0.061772	0.0130954	2.26e-06	11862	G	A	-1.21615e-05	0.000293999	0.97	462933
genus.Akkermansia.id.4037	rs2602429	16	81063149	0.00194416	22.7656	C	T	0.0745352	0.0156201	2.72e-06	11689	C	T	-0.000115881	0.00035495	0.74	462933
genus.Akkermansia.id.4037	rs4242783	10	5064327	0.00183914	21.5336	G	A	0.0685454	0.0147701	3e-06	11689	G	A	-0.00032449	0.000331886	0.33	462933
genus.Akkermansia.id.4037	rs4936098	11	130280667	0.00192011	22.8067	A	G	0.0649225	0.0135934	1.1e-06	11857	A	G	-7.86344e-05	0.000302425	0.79	462933
genus.Akkermansia.id.4037	rs61779207	1	41074472	0.00176997	20.5468	G	A	-0.0760539	0.0167769	6.32e-06	11590	G	A	-0.000501779	0.00037875	0.19	462933
genus.Akkermansia.id.4037	rs74542928	4	100544188	0.00201908	22.6858	T	C	0.112623	0.0236434	1.48e-06	11215	T	C	0.000354396	0.000487268	0.47	462933
genus.Akkermansia.id.4037	rs9349825	6	56341481	0.0019239	22.8518	A	G	-0.0703407	0.0147133	2.6e-06	11857	A	G	0.000190809	0.000331105	0.56	462933
genus.Akkermansia.id.4037	rs941682	20	31867840	0.00163864	19.3775	G	A	-0.0632957	0.0143777	9.17e-06	11808	G	A	-0.000828098	0.000326353	0.0109999	462933
genus.Alistipes.id.968	rs1107244	13	38057357	0.00111629	19.6341	G	A	0.0758558	0.0171182	3.59e-06	17571	G	A	0.000274716	0.000515701	0.59	462933
genus.Alistipes.id.968	rs11769002	7	62443498	0.00132817	23.3657	G	A	-0.0528793	0.0109389	1.45e-06	17571	G	A	0.000910295	0.000298201	0.00230001	462933
genus.Alistipes.id.968	rs11958296	5	177755179	0.00124482	20.2062	A	G	-0.0981222	0.0218272	9.3e-06	16214	A	G	0.000684478	0.00055756	0.22	462933
genus.Alistipes.id.968	rs12990744	2	178000949	0.0012059	20.1531	C	T	-0.0776618	0.0172986	8.21e-06	16694	C	T	0.000949262	0.000454733	0.0369999	462933
genus.Alistipes.id.968	rs1689282	9	14080129	0.00121751	20.8301	A	C	-0.0520061	0.0113942	5.28e-06	17090	A	C	0.000295008	0.000309218	0.34	462933
genus.Alistipes.id.968	rs2290844	10	127787142	0.00102574	18.0398	C	T	0.0813969	0.0191632	9.1e-06	17571	C	T	0.000213872	0.000544012	0.69	462933
genus.Alistipes.id.968	rs2450745	8	144428720	0.00108054	19.0046	A	C	-0.080524	0.0184702	7.12e-06	17571	A	C	-0.000780115	0.000507963	0.12	462933
genus.Alistipes.id.968	rs2875322	11	130887552	0.00111779	19.5351	T	C	-0.0580945	0.0131432	8.78e-06	17459	T	C	-0.000269239	0.000360243	0.450001	462933
genus.Alistipes.id.968	rs34417064	17	52776479	0.00115653	20.3414	A	G	-0.048202	0.0106868	7.01e-06	17570	A	G	3.61853e-05	0.000291247	0.9	462933
genus.Alistipes.id.968	rs4810359	20	41191335	0.00114522	19.9244	A	G	-0.0652428	0.0146155	7.5e-06	17380	A	G	0.000365537	0.000399681	0.36	462933
genus.Alistipes.id.968	rs62576416	9	112120264	0.00114624	20.1534	T	C	0.0492647	0.0109733	7.5e-06	17564	T	C	-0.000421853	0.000298687	0.16	462933
genus.Alistipes.id.968	rs67281112	7	135778919	0.00123851	21.1898	G	C	0.0634575	0.0137846	3.92e-06	17090	G	C	0.000380047	0.000351843	0.28	462933
genus.Alistipes.id.968	rs67705352	1	19790706	0.00131109	23.0596	T	G	-0.0532404	0.0110864	1.65e-06	17567	T	G	-2.78853e-05	0.000302991	0.93	462933
genus.Alistipes.id.968	rs7129639	11	17511427	0.00130433	22.9458	C	A	-0.0524955	0.0109584	1.78e-06	17571	C	A	-0.000220443	0.000300968	0.46	462933
genus.Alistipes.id.968	rs8130320	21	40580258	0.00118841	20.904	A	G	-0.049002	0.010717	4.84e-06	17571	A	G	-0.000219732	0.00029319	0.450001	462933
genus.Allisonella.id.2174	rs1901739	5	114286707	0.00670486	21.6679	T	G	0.115769	0.0248626	3.59e-06	3212	T	G	0.000502914	0.000293325	0.0860003	462933
genus.Allisonella.id.2174	rs35110698	12	28018998	0.00643326	20.7845	T	C	-0.146322	0.0320852	5.72e-06	3212	T	C	0.000564523	0.000393178	0.15	462933
genus.Allisonella.id.2174	rs35778461	9	100150556	0.007527	24.3449	C	T	0.146679	0.0297186	1.21e-06	3212	C	T	0.000695619	0.000369224	0.0599998	462933
genus.Allisonella.id.2174	rs594561	11	88632972	0.00615272	19.8725	C	T	0.112231	0.0251681	9.41e-06	3212	C	T	0.000198246	0.000292765	0.5	462933
genus.Allisonella.id.2174	rs602075	9	79110160	0.00997858	32.3541	A	G	0.168974	0.0296976	3.57e-08	3212	A	G	0.000321946	0.000332332	0.33	462933
genus.Allisonella.id.2174	rs6742198	2	33607071	0.00693158	22.1963	G	A	0.149152	0.0316484	3.35e-06	3182	G	A	-0.00034891	0.000360097	0.33	462933
genus.Allisonella.id.2174	rs685403	18	75370866	0.00580761	18.7513	G	C	-0.175203	0.0404474	4.88e-06	3212	G	C	0.000564424	0.000517068	0.28	462933
genus.Allisonella.id.2174	rs76904847	7	137968010	0.00614462	19.6607	G	A	0.148523	0.0334857	6.09e-06	3182	G	A	0.000208319	0.000381577	0.59	462933
genus.Allisonella.id.2174	rs7898615	10	122413451	0.00625407	20.2019	T	G	0.167966	0.0373586	8.87e-06	3212	T	G	-0.000237189	0.000438217	0.59	462933
genus.Alloprevotella.id.961	rs12675596	8	69994816	0.00827981	25.0969	G	T	0.145669	0.0290678	9.64e-07	3008	G	T	-0.000302034	0.000338238	0.37	462933
genus.Alloprevotella.id.961	rs17380632	3	79794395	0.00661972	20.0381	A	T	0.125564	0.0280409	9.27e-06	3009	A	T	-0.000206985	0.000320827	0.52	462933
genus.Alloprevotella.id.961	rs2154444	21	36053643	0.00660881	20.0049	T	G	0.138234	0.0308961	8.37e-06	3009	T	G	3.44751e-05	0.000366233	0.93	462933
genus.Alloprevotella.id.961	rs34619204	21	40993008	0.00678943	20.5144	G	A	-0.156037	0.0344392	8.84e-06	3003	G	A	0.000203482	0.000366862	0.58	462933
genus.Alloprevotella.id.961	rs4364940	1	234126516	0.00662695	20.0535	A	G	0.126418	0.0282207	8.58e-06	3008	A	G	-0.000235866	0.000329855	0.47	462933
genus.Alloprevotella.id.961	rs4680035	3	152805600	0.00701735	21.2361	A	G	-0.119599	0.0259446	4.99e-06	3007	A	G	0.000369573	0.000292765	0.21	462933
genus.Alloprevotella.id.961	rs58212166	4	189076705	0.00668624	20.2139	A	G	-0.161506	0.0359102	7.94e-06	3005	A	G	8.40388e-05	0.000425429	0.84	462933
genus.Anaerofilum.id.2053	rs10794359	11	1051715	0.00450395	22.5854	T	C	-0.0953524	0.02006	2.23e-06	4994	T	C	0.000117394	0.000297786	0.69	462933
genus.Anaerofilum.id.2053	rs1563175	2	3838940	0.00411757	20.8755	A	C	0.0923834	0.0202157	5.54e-06	5051	A	C	0.000135448	0.000295869	0.649999	462933
genus.Anaerofilum.id.2053	rs17012738	2	76698142	0.00401378	20.3472	T	G	0.0903417	0.0200239	7.24e-06	5051	T	G	-0.00011818	0.000293501	0.69	462933
genus.Anaerofilum.id.2053	rs17096874	14	30991358	0.00435058	22.062	C	T	-0.126337	0.0268919	2.86e-06	5051	C	T	5.62838e-05	0.000392737	0.89	462933
genus.Anaerofilum.id.2053	rs17105491	10	125294406	0.0045214	22.0466	G	C	-0.193107	0.0411187	1.57e-06	4856	G	C	-0.000567332	0.000604151	0.35	462933
genus.Anaerofilum.id.2053	rs356049	17	6450532	0.00417482	20.9281	G	A	0.132603	0.0289802	6.56e-06	4994	G	A	0.000260185	0.000422879	0.54	462933
genus.Anaerofilum.id.2053	rs4244069	12	67167461	0.00399923	20.1888	G	A	-0.146775	0.0326594	9.81e-06	5030	G	A	0.000215019	0.00047421	0.649999	462933
genus.Anaerofilum.id.2053	rs4506496	1	247145690	0.00473034	23.4457	G	A	0.10309	0.0212861	1.49e-06	4935	G	A	-3.82837e-05	0.000309706	0.9	462933
genus.Anaerofilum.id.2053	rs712981	3	129686434	0.00485854	24.6505	A	C	0.10076	0.0202902	6.83e-07	5051	A	C	0.00018661	0.000297643	0.53	462933
genus.Anaerofilum.id.2053	rs79598899	2	191139151	0.00551538	26.1049	C	T	0.182586	0.0357284	3.75e-07	4709	C	T	8.27886e-05	0.000531934	0.88	462933
genus.Anaerofilum.id.2053	rs816292	12	117811409	0.00521241	26.2772	T	C	-0.113003	0.02204	2.64e-07	5017	T	C	0.000266318	0.00033166	0.42	462933
genus.Anaerofilum.id.2053	rs9299345	9	104339812	0.00401255	20.341	T	C	-0.1364	0.0302372	8.04e-06	5051	T	C	-0.00023196	0.000431597	0.59	462933
genus.Anaerostipes.id.1991	rs10502061	11	105615253	0.00112469	18.942	A	G	0.0835752	0.0192017	7.94e-06	16825	A	G	0.00060117	0.000530855	0.26	462933
genus.Anaerostipes.id.1991	rs2014785	3	171100102	0.00128294	21.1224	T	C	0.0515687	0.0112199	4.68e-06	16445	T	C	-0.000328539	0.000305335	0.28	462933
genus.Anaerostipes.id.1991	rs2396460	2	228018671	0.00129307	21.8941	T	C	-0.0512653	0.0109555	2.91e-06	16912	T	C	0.000205992	0.000295549	0.49	462933
genus.Anaerostipes.id.1991	rs2804244	10	117383184	0.00135007	22.8795	A	G	-0.053089	0.0110983	2.04e-06	16926	A	G	0.000317892	0.000291721	0.28	462933
genus.Anaerostipes.id.1991	rs3900776	9	13525082	0.00147291	21.6719	G	A	-0.110013	0.0236302	2.75e-06	14694	G	A	-8.11127e-05	0.00056909	0.89	462933
genus.Anaerostipes.id.1991	rs60983350	17	2850737	0.00131065	21.4468	G	A	-0.0539901	0.0116575	4.42e-06	16344	G	A	-0.000473207	0.000332338	0.15	462933
genus.Anaerostipes.id.1991	rs62157625	2	142774333	0.00149544	22.7842	T	C	0.088573	0.0185548	1.45e-06	15215	T	C	0.0011344	0.000463801	0.0140001	462933
genus.Anaerostipes.id.1991	rs62215703	21	25873624	0.00142946	22.2571	G	A	0.0644965	0.0136702	1.98e-06	15550	G	A	-0.000210135	0.000360349	0.56	462933
genus.Anaerostipes.id.1991	rs6474958	9	1582701	0.00117693	19.9324	A	G	-0.0500065	0.0112001	6.74e-06	16918	A	G	-0.000147279	0.00029558	0.62	462933
genus.Anaerostipes.id.1991	rs6726833	2	39351569	0.0012666	21.4606	C	A	-0.0877497	0.0189408	3.32e-06	16924	C	A	-0.00102587	0.000554173	0.064	462933
genus.Anaerostipes.id.1991	rs6854026	4	169690814	0.00128267	21.7294	T	C	-0.0508482	0.0109075	3.2e-06	16921	T	C	-0.000170283	0.000291917	0.56	462933
genus.Anaerostipes.id.1991	rs7193624	16	77574020	0.00146324	24.8001	C	T	0.0750642	0.0150723	5.35e-07	16926	C	T	-6.576e-05	0.000406302	0.87	462933
genus.Anaerostipes.id.1991	rs7823228	8	128397494	0.00125525	20.6661	G	C	-0.0621085	0.0136614	5.84e-06	16445	G	C	0.000223506	0.000362429	0.54	462933
genus.Anaerostipes.id.1991	rs78735375	19	1497547	0.001952	20.2584	A	C	-0.137429	0.0305304	5.33e-06	10360	A	C	-0.000219862	0.00063821	0.73	462933
genus.Anaerotruncus.id.2054	rs10150232	14	30418008	0.0012779	20.6197	A	G	0.0567088	0.0124877	6.68e-06	16117	A	G	-0.000477219	0.000322691	0.14	462933
genus.Anaerotruncus.id.2054	rs11018566	11	89040226	0.00290211	18.2666	A	G	-0.156465	0.0366032	6.14e-06	6278	A	G	-0.000289084	0.000713518	0.69	462933
genus.Anaerotruncus.id.2054	rs115414803	4	88163243	0.00222397	20.6644	A	C	-0.144356	0.0317524	6.83e-06	9273	A	C	-8.1824e-05	0.00069062	0.91	462933
genus.Anaerotruncus.id.2054	rs12056802	8	74713100	0.00119116	19.0909	C	G	0.0774194	0.0177178	6.13e-06	16010	C	G	0.000262031	0.000512522	0.61	462933
genus.Anaerotruncus.id.2054	rs1272208	9	78630894	0.00137563	22.1988	G	T	-0.0611743	0.0129831	4.28e-06	16117	G	T	-0.000206647	0.000344685	0.55	462933
genus.Anaerotruncus.id.2054	rs1431492	3	150855371	0.00121079	20.0725	C	T	-0.0654996	0.0146188	7.36e-06	16560	C	T	0.000435347	0.00038705	0.26	462933
genus.Anaerotruncus.id.2054	rs17734739	2	211663702	0.00122927	19.6002	T	C	0.0660052	0.014908	7.43e-06	15927	T	C	0.00101402	0.000379574	0.00759994	462933
genus.Anaerotruncus.id.2054	rs34449434	12	76523655	0.00119035	19.2054	A	C	-0.0497004	0.0113402	9.85e-06	16117	A	C	-4.59891e-06	0.000314134	0.99	462933
genus.Anaerotruncus.id.2054	rs4669806	2	12200752	0.00132395	21.9589	G	T	0.0576389	0.0122994	2.42e-06	16566	G	T	0.000142145	0.000327347	0.66	462933
genus.Anaerotruncus.id.2054	rs6494922	15	33459867	0.00123937	19.9351	A	G	0.0903106	0.0202257	6.62e-06	16067	A	G	4.41975e-05	0.000539541	0.93	462933
genus.Anaerotruncus.id.2054	rs6563550	13	38058413	0.00148449	24.6256	T	C	0.0877135	0.0176745	2.35e-07	16566	T	C	0.000257826	0.000515814	0.62	462933
genus.Anaerotruncus.id.2054	rs7155595	14	77502546	0.00124142	20.5722	C	A	0.0539336	0.0118903	7.55e-06	16553	C	A	0.000522964	0.000311639	0.0929994	462933
genus.Anaerotruncus.id.2054	rs7675045	4	172808992	0.00122204	20.2667	A	T	-0.0497815	0.0110573	6.92e-06	16566	A	T	0.00020253	0.000293229	0.49	462933
genus.Anaerotruncus.id.2054	rs8005030	14	30607199	0.00133568	22.1297	C	T	0.0554447	0.0117854	2.28e-06	16548	C	T	-0.000141431	0.000312429	0.649999	462933
genus.Anaerotruncus.id.2054	rs9347879	6	165015261	0.00126531	20.9851	T	C	0.050618	0.011049	4.22e-06	16566	T	C	9.42617e-05	0.000291661	0.75	462933
genus.Bacteroides.id.918	rs11585893	1	10644351	0.00141067	25.1722	A	G	-0.0740746	0.0147633	1.8e-06	17821	A	G	-0.000150815	0.000422636	0.719999	462933
genus.Bacteroides.id.918	rs13207588	6	41519430	0.00114879	20.3627	A	G	-0.059205	0.0131195	7.49e-06	17707	A	G	0.000507296	0.000357162	0.16	462933
genus.Bacteroides.id.918	rs1340391	1	102960989	0.00109376	20.0377	T	C	-0.0592004	0.0132244	6.73e-06	18302	T	C	-0.000186975	0.000365732	0.61	462933
genus.Bacteroides.id.918	rs17619981	19	24342250	0.00140263	22.1913	T	G	0.0880978	0.0187002	2.69e-06	15801	T	G	0.000250001	0.000483885	0.61	462933
genus.Bacteroides.id.918	rs2023437	14	22045949	0.00124414	21.7771	T	C	-0.0782324	0.0167634	5.02e-06	17484	T	C	-0.000215083	0.000460735	0.64	462933
genus.Bacteroides.id.918	rs2366421	3	62019400	0.00110998	20.3319	T	A	-0.0528153	0.0117124	7.65e-06	18299	T	A	-0.000170034	0.000328739	0.6	462933
genus.Bacteroides.id.918	rs28757219	6	29143451	0.00155418	23.0859	T	A	0.0818398	0.0170319	1.29e-06	14833	T	A	0.000404528	0.000405628	0.32	462933
genus.Bacteroides.id.918	rs495004	9	112855426	0.00123421	21.8787	C	G	-0.0607475	0.0129865	3.42e-06	17707	C	G	0.000459417	0.000364422	0.21	462933
genus.Bacteroides.id.918	rs66474973	20	58605432	0.0014001	24.4001	G	T	0.0812515	0.0164479	6.81e-07	17405	G	T	-0.000726678	0.000449957	0.11	462933
genus.Bacteroides.id.918	rs66710942	3	77215327	0.00115709	20.642	C	T	0.0488038	0.0107412	5.86e-06	17821	C	T	0.000229244	0.000297626	0.44	462933
genus.Bacteroides.id.918	rs6795673	3	10593224	0.00142865	26.1803	C	T	0.0538565	0.0105251	3.38e-07	18301	C	T	2.89976e-05	0.000293208	0.92	462933
genus.Bacteroides.id.918	rs9507307	13	24910476	0.00120359	21.91	C	T	0.0604456	0.0129128	2.13e-06	18184	C	T	8.76212e-05	0.000368793	0.81	462933
genus.Barnesiella.id.944	rs11155559	6	148601905	0.00150359	20.1499	T	C	0.0956023	0.0212961	8.92e-06	13383	T	C	-0.000245066	0.000509406	0.630001	462933
genus.Barnesiella.id.944	rs113258194	2	180020849	0.00153038	21.3708	A	G	0.098992	0.0214121	7.31e-06	13945	A	G	-0.00108223	0.000542183	0.0460002	462933
genus.Barnesiella.id.944	rs12909713	15	87145913	0.00147954	21.045	C	T	-0.0550716	0.0120039	4.95e-06	14205	C	T	-0.000454448	0.000293799	0.12	462933
genus.Barnesiella.id.944	rs13242616	7	122021518	0.00160798	22.4562	T	C	-0.0583747	0.0123176	2.29e-06	13945	T	C	-7.6365e-06	0.000309009	0.98	462933
genus.Barnesiella.id.944	rs199035	6	23435415	0.00156384	21.8388	G	A	0.0559495	0.0119716	3e-06	13945	G	A	-0.000259645	0.000292758	0.38	462933
genus.Barnesiella.id.944	rs2057922	7	10076378	0.00155409	22.1117	G	C	0.0915241	0.0194623	3.83e-06	14208	G	C	0.00103234	0.000486656	0.0340001	462933
genus.Barnesiella.id.944	rs2276875	4	5730954	0.00179362	24.9599	A	G	-0.0697176	0.0139537	4.65e-07	13893	A	G	0.000651836	0.000337214	0.0530005	462933
genus.Barnesiella.id.944	rs2428166	6	110831148	0.00297936	24.172	G	A	-0.165859	0.0337309	8.51e-07	8091	G	A	0.000323199	0.00063669	0.61	462933
genus.Barnesiella.id.944	rs28418786	8	25834694	0.00149122	20.4542	C	G	-0.0791324	0.0174957	6.48e-06	13698	C	G	-0.000207294	0.000425303	0.630001	462933
genus.Barnesiella.id.944	rs28479800	1	206216607	0.00152944	18.9895	A	T	-0.09152	0.0210002	7.93e-06	12399	A	T	0.00056164	0.000501187	0.26	462933
genus.Barnesiella.id.944	rs35177866	3	181589155	0.00173411	23.2635	A	G	0.0917125	0.0190133	2.95e-06	13394	A	G	4.22719e-05	0.000453118	0.93	462933
genus.Barnesiella.id.944	rs60316894	12	54872438	0.00182629	23.2637	C	T	-0.121478	0.025184	1.19e-06	12717	C	T	-0.000529179	0.000618119	0.39	462933
genus.Barnesiella.id.944	rs62251337	3	44327429	0.00153117	21.3818	A	G	-0.0690763	0.0149374	4.24e-06	13945	A	G	-0.000422327	0.000350741	0.23	462933
genus.Barnesiella.id.944	rs72684847	4	102616869	0.00156062	20.2917	T	C	-0.114369	0.0253873	6.76e-06	12984	T	C	-0.000110928	0.0006133	0.86	462933
genus.Barnesiella.id.944	rs76181748	8	105458416	0.00144677	20.5724	C	T	-0.0778559	0.017164	6.78e-06	14201	C	T	0.000174291	0.000422535	0.68	462933
genus.Barnesiella.id.944	rs77455852	5	54107036	0.0015485	20.7696	T	G	-0.0891491	0.0195601	3.16e-06	13394	T	G	-0.000582198	0.00044424	0.19	462933
genus.Barnesiella.id.944	rs79795328	4	114546595	0.00157382	21.5243	A	G	-0.0818645	0.0176441	4.23e-06	13657	A	G	-0.000379436	0.000426398	0.37	462933
genus.Bifidobacterium.id.436	rs10841473	12	20378911	0.00157131	23.2526	G	C	-0.0624207	0.0129438	1.65e-06	14777	G	C	-0.000458684	0.000331323	0.17	462933
genus.Bifidobacterium.id.436	rs12022129	1	207003374	0.00134308	19.8693	G	A	0.0619356	0.0138937	8e-06	14776	G	A	0.000101075	0.000362799	0.780001	462933
genus.Bifidobacterium.id.436	rs182549	2	136616754	0.0059483	88.418	C	T	0.119703	0.0127294	1.28e-20	14778	C	T	-0.000826711	0.000328573	0.012	462933
genus.Bifidobacterium.id.436	rs2491158	10	126089703	0.00141583	19.8766	G	A	0.0712624	0.015983	8.05e-06	14021	G	A	0.000172184	0.000376131	0.649999	462933
genus.Bifidobacterium.id.436	rs2686790	7	48090746	0.00135591	20.0621	T	C	0.070741	0.0157926	7.5e-06	14778	T	C	-0.000233194	0.000413257	0.57	462933
genus.Bifidobacterium.id.436	rs4567981	2	49906864	0.00154675	22.7167	T	A	0.0562084	0.0117923	1.93e-06	14666	T	A	0.000574741	0.000296427	0.0530005	462933
genus.Bifidobacterium.id.436	rs540489	17	72897722	0.00144841	21.118	T	G	-0.0637641	0.0138746	5.19e-06	14561	T	G	-0.000238527	0.000344868	0.49	462933
genus.Bifidobacterium.id.436	rs55888705	4	1517826	0.0013745	20.3362	A	G	0.0546319	0.0121139	6.67e-06	14777	A	G	0.000131174	0.000302016	0.66	462933
genus.Bifidobacterium.id.436	rs56108664	5	537890	0.00153294	21.362	T	C	0.0729971	0.0157926	2.44e-06	13916	T	C	6.34709e-05	0.000366102	0.86	462933
genus.Bifidobacterium.id.436	rs5746486	22	18354272	0.00133152	19.7008	T	C	-0.0536216	0.0120801	9e-06	14778	T	C	-0.000294618	0.000303703	0.33	462933
genus.Bifidobacterium.id.436	rs62181700	2	189805784	0.00153179	22.6622	G	A	-0.0624643	0.0131205	2.17e-06	14774	G	A	0.000482177	0.000325547	0.14	462933
genus.Bifidobacterium.id.436	rs7322849	13	112859829	0.0020957	31.0311	T	C	0.112428	0.0201813	1.08e-08	14778	T	C	5.30802e-05	0.00063144	0.93	462933
genus.Bifidobacterium.id.436	rs73797465	5	142793467	0.00141417	20.7667	T	G	-0.0953566	0.0209236	4.38e-06	14666	T	G	-0.000705991	0.000592982	0.23	462933
genus.Bifidobacterium.id.436	rs75344046	21	31861790	0.00543914	21.0771	C	T	0.232354	0.0505979	4.86e-06	3856	C	T	0.000417484	0.000738303	0.57	462933
genus.Bifidobacterium.id.436	rs76671854	5	169748189	0.00152902	21.1389	C	G	-0.0846055	0.0184003	3.96e-06	13806	C	G	0.000380165	0.000440879	0.39	462933
genus.Bifidobacterium.id.436	rs857444	6	14617591	0.00143311	21.2047	C	T	0.0558234	0.0121219	3.57e-06	14777	C	T	-1.97391e-05	0.000305818	0.95	462933
genus.Bilophila.id.3170	rs11069458	13	102402685	0.00149843	19.2898	T	C	-0.0680947	0.015503	7.72e-06	12856	T	C	-0.00038739	0.000388875	0.32	462933
genus.Bilophila.id.3170	rs116261629	6	20505628	0.00212632	24.0233	G	C	0.128112	0.0261358	8.62e-07	11276	G	C	-0.000401767	0.000592894	0.5	462933
genus.Bilophila.id.3170	rs1241171	1	103299921	0.0016526	21.2777	G	A	-0.0692654	0.0150148	4.24e-06	12856	G	A	0.000293193	0.000357814	0.41	462933
genus.Bilophila.id.3170	rs1571225	9	4940871	0.0018236	23.4797	C	T	0.0826826	0.0170621	1.12e-06	12854	C	T	0.000196014	0.000421363	0.64	462933
genus.Bilophila.id.3170	rs1917709	7	123174986	0.00180081	19.6354	A	T	0.118509	0.026742	7.37e-06	10886	A	T	0.000130124	0.000582362	0.82	462933
genus.Bilophila.id.3170	rs1969927	12	100786847	0.00154597	19.7804	G	A	0.0564589	0.0126935	9.07e-06	12777	G	A	-0.000255062	0.000296338	0.39	462933
genus.Bilophila.id.3170	rs2713349	7	9510367	0.00150624	19.3859	A	T	0.0617228	0.0140174	8.63e-06	12853	A	T	-6.77015e-05	0.000330874	0.84	462933
genus.Bilophila.id.3170	rs2728491	7	47211859	0.00157197	20.2379	G	T	-0.0627416	0.0139456	6.33e-06	12856	G	T	0.00019059	0.000323418	0.56	462933
genus.Bilophila.id.3170	rs3827020	20	61980991	0.00179955	22.7621	C	T	0.0766479	0.0160642	1.79e-06	12628	C	T	0.000145329	0.000389843	0.709999	462933
genus.Bilophila.id.3170	rs4798126	18	3765773	0.00148739	19.0297	G	A	0.073288	0.016799	7.15e-06	12777	G	A	8.1861e-05	0.000412283	0.84	462933
genus.Bilophila.id.3170	rs542415	15	50011554	0.00165238	21.1441	T	C	-0.0613623	0.0133436	4.71e-06	12777	T	C	9.21216e-05	0.000309335	0.77	462933
genus.Bilophila.id.3170	rs60178956	8	90878338	0.00152403	19.4993	G	A	-0.0624818	0.0141485	8.06e-06	12777	G	A	0.000157138	0.000333704	0.64	462933
genus.Bilophila.id.3170	rs6793291	3	194419531	0.00196564	21.7611	C	A	0.112729	0.0241633	3.11e-06	11051	C	A	0.000122962	0.000499654	0.81	462933
genus.Bilophila.id.3170	rs72676854	8	109990939	0.00180517	21.0031	T	C	0.123209	0.026882	5.62e-06	11616	T	C	0.000506551	0.000594829	0.39	462933
genus.Bilophila.id.3170	rs7802841	7	138583840	0.00183865	23.6775	C	A	0.0670097	0.0137701	1.77e-06	12856	C	A	-0.00034311	0.000314972	0.28	462933
genus.Bilophila.id.3170	rs8013541	14	67640571	0.00160876	20.7123	A	T	-0.0571991	0.0125673	5.48e-06	12856	A	T	-0.000398984	0.000294347	0.18	462933
genus.Bilophila.id.3170	rs9899990	17	9121579	0.0015927	19.2801	A	G	-0.102702	0.0233878	9.07e-06	12088	A	G	-0.000324696	0.000535702	0.54	462933
genus.Blautia.id.1992	rs11149971	16	77238810	0.00155285	25.2777	C	T	0.117605	0.02339	1.04e-06	16255	C	T	-0.000124071	0.000640042	0.85	462933
genus.Blautia.id.1992	rs113271346	14	78062644	0.00118262	20.6765	C	T	0.0782682	0.0172116	6.85e-06	17465	C	T	2.87871e-05	0.000477033	0.95	462933
genus.Blautia.id.1992	rs115043014	1	175757311	0.00447934	22.0475	G	A	-0.206605	0.043992	5.19e-06	4902	G	A	-0.000249288	0.000700803	0.719999	462933
genus.Blautia.id.1992	rs117001700	7	68396262	0.00397721	19.8177	T	C	0.196414	0.0441122	8.84e-06	4965	T	C	0.00114924	0.000653455	0.0790005	462933
genus.Blautia.id.1992	rs12453000	17	16895873	0.0012974	23.1406	C	T	0.0625335	0.0129987	1.26e-06	17815	C	T	0.000489459	0.000356718	0.17	462933
genus.Blautia.id.1992	rs16892041	6	9298640	0.00105368	19.2753	T	C	-0.0622605	0.0141804	8.82e-06	18276	T	C	0.000605123	0.000402611	0.13	462933
genus.Blautia.id.1992	rs2788271	1	219117743	0.00101626	18.59	T	G	-0.0575596	0.0133492	7.16e-06	18276	T	G	-0.000219594	0.000388295	0.57	462933
genus.Blautia.id.1992	rs3005511	6	74605806	0.00111848	20.4621	A	G	0.0501085	0.0110768	6.19e-06	18276	A	G	3.72467e-05	0.000308009	0.9	462933
genus.Blautia.id.1992	rs4926264	19	13420917	0.0011743	21.4844	T	C	0.0826207	0.0178239	5.1e-06	18276	T	C	-0.00024557	0.000564847	0.66	462933
genus.Blautia.id.1992	rs67794373	7	124210039	0.00130679	23.7571	C	T	0.0601709	0.0123443	1e-06	18158	C	T	0.000315687	0.000348677	0.37	462933
genus.Blautia.id.1992	rs682885	11	87805911	0.00115437	21.117	A	G	-0.0493376	0.0107359	4.49e-06	18274	A	G	0.000188304	0.000297263	0.53	462933
genus.Blautia.id.1992	rs72973581	19	1043103	0.0017395	22.2381	A	G	0.125169	0.0265408	1.74e-06	12764	A	G	-0.000259245	0.000613472	0.67	462933
genus.Blautia.id.1992	rs7860714	9	1866537	0.00114929	20.8952	A	G	-0.0502178	0.0109853	4.09e-06	18162	A	G	0.00018788	0.000311502	0.55	462933
genus.Butyricicoccus.id.2055	rs10084203	2	191304149	0.00115369	19.789	A	G	0.0549699	0.0123563	8.59e-06	17135	A	G	-0.000342479	0.000336143	0.31	462933
genus.Butyricicoccus.id.2055	rs12034718	1	67379595	0.00120827	19.64	A	G	0.0701199	0.0158214	9.58e-06	16237	A	G	-9.29869e-05	0.000410234	0.82	462933
genus.Butyricicoccus.id.2055	rs12585793	13	27018240	0.00682955	21.5441	T	C	-0.262206	0.0564729	5.79e-06	3135	T	C	0.000532568	0.000716739	0.46	462933
genus.Butyricicoccus.id.2055	rs2017189	4	7460153	0.0012328	21.1451	G	T	-0.0506956	0.011024	3.87e-06	17133	G	T	4.01613e-05	0.000294392	0.89	462933
genus.Butyricicoccus.id.2055	rs4962426	10	126908208	0.00120662	20.4007	G	T	0.0614216	0.0135979	7.38e-06	16889	G	T	-0.000235418	0.000352974	0.5	462933
genus.Butyricicoccus.id.2055	rs56221232	2	153453410	0.00142601	24.4638	T	C	0.0828027	0.0167401	7.62e-07	17133	T	C	-0.000474723	0.00045377	0.3	462933
genus.Butyricicoccus.id.2055	rs62478070	7	157688150	0.00508716	20.4782	T	G	0.224039	0.0494959	5.94e-06	4007	T	G	-0.00105436	0.00066146	0.11	462933
genus.Butyricicoccus.id.2055	rs7322368	13	100213990	0.00115623	19.8314	T	C	0.0815733	0.0183167	5.52e-06	17134	T	C	0.000112966	0.000496893	0.82	462933
genus.Butyricicoccus.id.2055	rs75238760	18	22899113	0.00114966	19.5897	T	A	0.0619423	0.0139942	6.8e-06	17022	T	A	0.000543413	0.000366766	0.14	462933
genus.Butyricimonas.id.945	rs11228830	11	56664962	0.00228434	20.542	A	G	0.135265	0.0298411	6.55e-06	8974	A	G	0.000573277	0.000573607	0.32	462933
genus.Butyricimonas.id.945	rs113054641	21	16550389	0.00279069	27.8367	G	A	-0.144881	0.0274574	1.74e-07	9949	G	A	0.000216575	0.000577715	0.709999	462933
genus.Butyricimonas.id.945	rs12304031	12	129438771	0.00179924	19.2072	G	A	-0.086278	0.0196846	6.7e-06	10658	G	A	-0.000481593	0.000435029	0.27	462933
genus.Butyricimonas.id.945	rs12458763	18	34091618	0.00196972	20.488	A	C	0.122037	0.0269587	6.37e-06	10383	A	C	-0.000616273	0.000552492	0.26	462933
genus.Butyricimonas.id.945	rs1862649	16	22172866	0.00204828	20.7732	G	A	0.113124	0.0248176	4.76e-06	10123	G	A	-9.97832e-06	0.000511898	0.98	462933
genus.Butyricimonas.id.945	rs2114713	15	80528373	0.00189333	20.3577	G	T	0.062721	0.0138998	6.88e-06	10734	G	T	-0.000407541	0.000295728	0.17	462933
genus.Butyricimonas.id.945	rs2642760	5	62119947	0.00225856	24.0674	G	C	0.0713357	0.0145396	8.58e-07	10634	G	C	0.000272452	0.000302686	0.37	462933
genus.Butyricimonas.id.945	rs270727	1	45082825	0.00198883	21.1874	G	C	-0.0694173	0.0150795	5.38e-06	10634	G	C	-0.000494778	0.000321679	0.12	462933
genus.Butyricimonas.id.945	rs326049	5	997217	0.00194202	20.5379	C	G	0.0759694	0.0167617	8.19e-06	10557	C	G	-2.20963e-05	0.000359295	0.95	462933
genus.Butyricimonas.id.945	rs62130338	19	49162501	0.00202409	21.4076	G	A	-0.0732608	0.0158324	3.9e-06	10557	G	A	-8.65639e-05	0.000351859	0.81	462933
genus.Butyricimonas.id.945	rs62390301	5	159867647	0.00233752	24.9107	T	C	-0.0872983	0.0174893	7.42e-07	10634	T	C	-0.000393138	0.000366979	0.28	462933
genus.Butyricimonas.id.945	rs7083431	10	72711156	0.0022048	23.7208	A	C	0.0703539	0.0144439	8.85e-07	10737	A	C	1.1221e-05	0.000306272	0.97	462933
genus.Butyricimonas.id.945	rs71428626	2	83093264	0.00215438	21.1024	G	T	-0.133188	0.0289905	4.8e-06	9776	G	T	-1.45419e-05	0.000579762	0.98	462933
genus.Butyricimonas.id.945	rs72814525	10	72443070	0.0018284	19.662	A	G	0.0664154	0.0149766	8.25e-06	10736	A	G	0.000105332	0.000314143	0.74	462933
genus.Butyricimonas.id.945	rs782080	3	127468661	0.00208572	22.4286	T	A	0.0653488	0.0137973	2.23e-06	10733	T	A	-9.43756e-05	0.000296983	0.75	462933
genus.Butyricimonas.id.945	rs78453362	3	78740009	0.00253858	20.882	A	G	-0.14948	0.0327073	4.06e-06	8207	A	G	0.000514111	0.000660661	0.44	462933
genus.Butyricimonas.id.945	rs9657374	8	4834406	0.00196185	21.1018	C	T	0.0680719	0.0148172	4.5e-06	10737	C	T	-8.47823e-05	0.00031648	0.79	462933
genus.Butyrivibrio.id.1993	rs1007475	6	148403405	0.00583036	20.4086	G	T	0.118065	0.0261271	7.92e-06	3482	G	T	-0.000190096	0.000315715	0.55	462933
genus.Butyrivibrio.id.1993	rs11761679	7	150596929	0.00661038	23.1572	T	C	0.154775	0.0321539	2.2e-06	3482	T	C	0.000478171	0.000389876	0.22	462933
genus.Butyrivibrio.id.1993	rs142855850	10	22587900	0.00618069	20.1002	A	G	0.205013	0.0457138	6.86e-06	3234	A	G	0.00012872	0.000484066	0.79	462933
genus.Butyrivibrio.id.1993	rs16934069	9	119693164	0.00569991	19.9494	T	C	-0.133784	0.0299444	8.86e-06	3482	T	C	-0.000298665	0.00036617	0.41	462933
genus.Butyrivibrio.id.1993	rs16941336	17	20575697	0.00645996	22.6268	C	T	0.127488	0.0267936	1.53e-06	3482	C	T	0.000166629	0.000329863	0.61	462933
genus.Butyrivibrio.id.1993	rs17163238	5	128976021	0.00593876	20.7904	G	A	0.140987	0.0309117	5.51e-06	3482	G	A	0.00038259	0.000361567	0.29	462933
genus.Butyrivibrio.id.1993	rs4537857	13	27292666	0.00650203	22.7752	T	C	-0.12459	0.0260992	1.8e-06	3482	T	C	0.000416441	0.000319075	0.19	462933
genus.Butyrivibrio.id.1993	rs486484	20	811507	0.00586231	20.3678	A	G	-0.108349	0.0240008	6.61e-06	3456	A	G	-2.18187e-05	0.000291754	0.94	462933
genus.Butyrivibrio.id.1993	rs4928024	3	54288503	0.00575155	20.1254	A	G	-0.17471	0.0389333	8.19e-06	3481	A	G	0.000574319	0.000498758	0.25	462933
genus.Butyrivibrio.id.1993	rs72723662	14	76065563	0.00802773	24.8527	C	T	0.224078	0.0449336	7.86e-07	3073	C	T	-0.000861361	0.00053043	0.1	462933
genus.Butyrivibrio.id.1993	rs7412979	1	235580646	0.00657748	23.0279	C	G	0.186779	0.0389112	1.71e-06	3480	C	G	0.000593608	0.000468759	0.21	462933
genus.Butyrivibrio.id.1993	rs74622183	14	34150977	0.00629702	22.0272	A	G	-0.201027	0.0428204	2.46e-06	3478	A	G	-0.000129778	0.000538028	0.81	462933
genus.Butyrivibrio.id.1993	rs77356209	18	10267733	0.00592401	20.1246	T	C	0.216874	0.0483299	6.66e-06	3379	T	C	-9.20005e-05	0.000598417	0.88	462933
genus.Butyrivibrio.id.1993	rs7752361	6	111780705	0.00704156	24.6713	A	G	-0.11923	0.0239975	7.69e-07	3481	A	G	0.00012979	0.00029228	0.66	462933
genus.Butyrivibrio.id.1993	rs7763512	6	21960091	0.0068185	22.3603	G	A	0.119846	0.0253367	3.11e-06	3259	G	A	0.000154309	0.000296636	0.6	462933
genus.Butyrivibrio.id.1993	rs9349693	6	53939724	0.00588424	20.5984	A	G	0.117973	0.0259861	5.55e-06	3482	A	G	0.000151516	0.000317264	0.630001	462933
genus.CandidatusSoleaferrea.id.11350	rs10090365	8	138638199	0.00344697	21.248	A	G	-0.0834413	0.0180989	4.17e-06	6145	A	G	0.000178573	0.000292317	0.54	462933
genus.CandidatusSoleaferrea.id.11350	rs10108780	8	123882833	0.00358555	21.5799	A	G	-0.092834	0.0199807	3.64e-06	5999	A	G	-0.00027674	0.000321205	0.39	462933
genus.CandidatusSoleaferrea.id.11350	rs10809135	9	10611282	0.00347903	20.9366	T	C	0.0834858	0.0182426	5.47e-06	5999	T	C	9.58601e-05	0.00029096	0.74	462933
genus.CandidatusSoleaferrea.id.11350	rs11153159	6	109376647	0.00328761	20.1172	G	C	-0.12805	0.0285446	4.42e-06	6101	G	C	-0.000981006	0.000456314	0.032	462933
genus.CandidatusSoleaferrea.id.11350	rs12500231	4	52935445	0.00321895	19.8379	A	T	0.0813853	0.0182696	7.68e-06	6145	A	T	0.00110091	0.000293955	0.000179999	462933
genus.CandidatusSoleaferrea.id.11350	rs2193878	3	190349049	0.00646398	20.0776	T	A	0.228255	0.0509241	9.46e-06	3088	T	A	0.000733468	0.000659471	0.27	462933
genus.CandidatusSoleaferrea.id.11350	rs36155147	7	352368	0.00317395	18.9642	C	T	0.104966	0.0240995	5.41e-06	5958	C	T	0.000245649	0.000395599	0.53	462933
genus.CandidatusSoleaferrea.id.11350	rs386526	10	82879688	0.00335061	20.6486	C	G	0.0818459	0.0180086	8.33e-06	6144	C	G	0.000218341	0.00028703	0.450001	462933
genus.CandidatusSoleaferrea.id.11350	rs4678258	3	137945192	0.00341588	20.9049	T	C	0.0986136	0.0215646	5.53e-06	6101	T	C	-0.000233641	0.000349198	0.5	462933
genus.CandidatusSoleaferrea.id.11350	rs61825792	1	224687852	0.00379638	23.41	T	C	0.112199	0.0231856	1.37e-06	6145	T	C	-8.99348e-05	0.000366763	0.81	462933
genus.CandidatusSoleaferrea.id.11350	rs6489992	12	115352769	0.0032768	20.1857	A	G	-0.0840437	0.0187031	7.89e-06	6142	A	G	-0.00043821	0.000301281	0.15	462933
genus.CandidatusSoleaferrea.id.11350	rs6494306	15	62394540	0.0033207	20.467	A	G	-0.0969304	0.0214221	5.8e-06	6145	A	G	-0.0005467	0.000349919	0.12	462933
genus.CandidatusSoleaferrea.id.11350	rs6881988	5	172758774	0.00329365	20.2832	G	C	-0.0819131	0.018185	9.23e-06	6140	G	C	0.000492311	0.000294326	0.0940005	462933
genus.CandidatusSoleaferrea.id.11350	rs7400877	14	76403542	0.00324017	19.9691	T	C	-0.0951085	0.0212799	9.29e-06	6145	T	C	0.000944872	0.000345307	0.00619998	462933
genus.CandidatusSoleaferrea.id.11350	rs830149	19	47991441	0.0042477	21.5979	C	G	0.184647	0.0397237	9.58e-06	5065	C	G	0.000428017	0.000663881	0.52	462933
genus.CandidatusSoleaferrea.id.11350	rs9973954	2	19885907	0.0033803	20.8356	A	G	0.0892075	0.0195401	5.95e-06	6145	A	G	-4.83139e-05	0.000324143	0.88	462933
genus.Catenibacterium.id.2153	rs12404911	1	240118443	0.00656552	21.3931	C	T	0.140717	0.0304142	2.8e-06	3239	C	T	-2.064e-05	0.000373095	0.96	462933
genus.Catenibacterium.id.2153	rs212393	6	159485742	0.0068476	22.3185	G	A	-0.135254	0.0286209	3.62e-06	3239	G	A	-5.92091e-05	0.000311315	0.85	462933
genus.Catenibacterium.id.2153	rs73128290	7	57364320	0.00637546	20.7698	A	G	0.129726	0.0284563	4.29e-06	3239	A	G	-8.5831e-05	0.000327228	0.79	462933
genus.Catenibacterium.id.2153	rs77285108	4	122282768	0.0064881	20.9497	G	A	-0.161826	0.0353447	3.63e-06	3210	G	A	-0.000415793	0.00039767	0.3	462933
genus.Catenibacterium.id.2153	rs7742829	6	105089665	0.0063356	20.6391	C	T	0.11411	0.0251099	5.61e-06	3239	C	T	0.000289946	0.000297161	0.33	462933
genus.ChristensenellaceaeR.7group.id.11283	rs10461257	4	156131004	0.00127731	20.4439	A	G	-0.0551969	0.0122069	6.51e-06	15987	A	G	0.000270899	0.000344055	0.43	462933
genus.ChristensenellaceaeR.7group.id.11283	rs17081797	18	67555560	0.0011994	19.6001	A	G	-0.0904325	0.0204253	3.34e-06	16324	A	G	0.0009872	0.000556629	0.0759994	462933
genus.ChristensenellaceaeR.7group.id.11283	rs60954665	19	35883736	0.00123702	20.2156	T	G	0.049815	0.0110787	7.13e-06	16324	T	G	-0.000207523	0.000292182	0.48	462933
genus.ChristensenellaceaeR.7group.id.11283	rs62132810	19	49279227	0.00141131	21.29	A	G	-0.0828853	0.0179623	5.67e-06	15066	A	G	-0.000129062	0.000474689	0.79	462933
genus.ChristensenellaceaeR.7group.id.11283	rs62190261	2	230943099	0.00130261	19.9193	A	C	0.0958394	0.0214723	8.74e-06	15274	A	C	-0.000748304	0.000568395	0.19	462933
genus.ChristensenellaceaeR.7group.id.11283	rs62467127	7	118096925	0.00160968	20.5033	C	T	0.114108	0.0251983	3.25e-06	12719	C	T	0.000602233	0.000641457	0.35	462933
genus.ChristensenellaceaeR.7group.id.11283	rs73952017	18	1779609	0.00128671	19.676	C	T	-0.0862164	0.0194354	8.46e-06	15274	C	T	0.000358823	0.000497488	0.47	462933
genus.ChristensenellaceaeR.7group.id.11283	rs78521377	10	126448374	0.00163864	20.6857	C	T	0.124992	0.0274797	5.61e-06	12605	C	T	0.00201852	0.00067084	0.00259998	462933
genus.ChristensenellaceaeR.7group.id.11283	rs79150079	5	29352420	0.00167466	20.1163	C	A	0.121547	0.0270977	9.42e-06	11994	C	A	0.00014618	0.000621403	0.81	462933
genus.ChristensenellaceaeR.7group.id.11283	rs892686	9	83043376	0.00130382	21.31	A	G	0.0514099	0.011136	3.97e-06	16325	A	G	-0.000138338	0.000293429	0.64	462933
genus.ChristensenellaceaeR.7group.id.11283	rs999354	19	34076956	0.0014997	24.5148	T	A	0.0580248	0.0117185	7.01e-07	16324	T	A	-0.000142591	0.000309654	0.649999	462933
genus.Clostridiumsensustricto1.id.1873	rs11264403	1	155676492	0.00236745	17.2831	G	A	-0.139062	0.0334454	7.76e-06	7285	G	A	-0.000469074	0.000700266	0.5	462933
genus.Clostridiumsensustricto1.id.1873	rs115807074	5	84997131	0.00501259	21.295	A	G	-0.22736	0.0492575	4.32e-06	4229	A	G	0.00132815	0.000689697	0.0539995	462933
genus.Clostridiumsensustricto1.id.1873	rs11586026	1	83252771	0.00149631	19.6206	A	T	0.110967	0.0250498	8.85e-06	13095	A	T	-0.000386014	0.000584813	0.51	462933
genus.Clostridiumsensustricto1.id.1873	rs116847295	12	43485015	0.00154659	19.9943	C	T	0.110021	0.0246032	4.58e-06	12910	C	T	-0.000161997	0.000621436	0.79	462933
genus.Clostridiumsensustricto1.id.1873	rs12341505	9	136710881	0.00143289	20.2558	G	A	0.0810718	0.0180121	4.82e-06	14118	G	A	0.000278133	0.000419676	0.51	462933
genus.Clostridiumsensustricto1.id.1873	rs12490337	3	111482845	0.00142167	20.1012	C	G	-0.0616879	0.0137581	7.49e-06	14121	C	G	0.000110534	0.000341534	0.75	462933
genus.Clostridiumsensustricto1.id.1873	rs2795528	10	43270264	0.0034572	22.078	G	A	-0.184315	0.0392204	2.72e-06	6366	G	A	0.000384079	0.000625425	0.54	462933
genus.Clostridiumsensustricto1.id.1873	rs2817172	1	3041519	0.0015943	21.8065	C	T	0.058139	0.0124492	2.77e-06	13658	C	T	-5.45394e-05	0.000302479	0.86	462933
genus.Clostridiumsensustricto1.id.1873	rs550843	6	165722832	0.00151708	21.4233	T	C	-0.0783246	0.0169209	2.05e-06	14102	T	C	-0.00104721	0.00044707	0.0189998	462933
genus.Collinsella.id.815	rs10890671	11	107123199	0.00142438	20.4433	T	C	-0.0537401	0.0118848	6.52e-06	14334	T	C	6.77482e-05	0.000291321	0.82	462933
genus.Collinsella.id.815	rs11597285	10	8589813	0.00138734	19.911	G	T	-0.0537947	0.0120548	9.38e-06	14334	G	T	0.00011817	0.000293475	0.69	462933
genus.Collinsella.id.815	rs12921100	16	77283458	0.00137242	19.6965	A	T	0.0563759	0.0127019	8.23e-06	14334	A	T	-0.00023407	0.000319444	0.46	462933
genus.Collinsella.id.815	rs1496626	19	31760841	0.00139183	19.9755	T	C	-0.0722307	0.01616	6.78e-06	14334	T	C	-0.000246568	0.000425566	0.56	462933
genus.Collinsella.id.815	rs149807560	19	56526640	0.00144857	19.5419	C	A	-0.104264	0.0235841	7.1e-06	13473	C	A	0.000269555	0.000555331	0.630001	462933
genus.Collinsella.id.815	rs2103510	21	29355467	0.00152295	21.8602	G	A	0.0786551	0.0168217	2.42e-06	14334	G	A	-0.000170433	0.000428977	0.69	462933
genus.Collinsella.id.815	rs2671662	17	47529492	0.00157359	22.5883	C	G	-0.0567751	0.011945	2.22e-06	14334	C	G	-0.000118752	0.000294844	0.69	462933
genus.Collinsella.id.815	rs59414781	15	50026113	0.00138944	19.9412	C	G	0.0668866	0.0149773	9.15e-06	14334	C	G	-0.00029109	0.000368401	0.43	462933
genus.Collinsella.id.815	rs62448871	7	24465024	0.00140476	20.1613	C	A	-0.0540309	0.0120324	6.78e-06	14334	C	A	0.000452739	0.000294034	0.12	462933
genus.Collinsella.id.815	rs73052258	2	195739311	0.00146757	21.0641	G	A	0.0930178	0.0202658	1.72e-06	14334	G	A	0.000139479	0.000486804	0.77	462933
genus.Collinsella.id.815	rs75672793	4	149818294	0.00162443	20.4995	A	G	-0.108908	0.0240522	6.14e-06	12601	A	G	-0.000120307	0.000543787	0.82	462933
genus.Collinsella.id.815	rs9541268	13	68610061	0.00182855	23.6535	C	A	0.09597	0.0197312	8.79e-07	12914	C	A	-0.000392774	0.00045128	0.38	462933
genus.Coprobacter.id.949	rs11532348	12	98289796	0.00328806	20.9876	C	T	-0.103931	0.0226826	5.71e-06	6364	C	T	0.000397634	0.000360467	0.27	462933
genus.Coprobacter.id.949	rs12684609	9	137784868	0.00327873	20.9279	T	C	0.100827	0.0220366	6.1e-06	6364	T	C	-0.000499952	0.000372108	0.18	462933
genus.Coprobacter.id.949	rs12996055	2	137223458	0.00294084	19.3724	A	C	0.0921817	0.0209405	8.08e-06	6570	A	C	0.000185687	0.000342094	0.59	462933
genus.Coprobacter.id.949	rs143662916	11	103549974	0.00708064	21.971	C	T	0.253264	0.0540141	3.07e-06	3083	C	T	-0.00120851	0.000624753	0.0530005	462933
genus.Coprobacter.id.949	rs189356	20	57574851	0.00304329	20.6385	G	A	0.0781125	0.0171916	6.26e-06	6763	G	A	0.000215423	0.000292358	0.46	462933
genus.Coprobacter.id.949	rs213863	6	97234939	0.00325385	22.1853	C	T	-0.0887412	0.0188377	2.35e-06	6798	C	T	-0.000332683	0.000324674	0.31	462933
genus.Coprobacter.id.949	rs28402691	4	96389240	0.00303115	19.4127	T	C	0.110695	0.0251199	9.56e-06	6387	T	C	-0.000204398	0.000418347	0.630001	462933
genus.Coprobacter.id.949	rs305411	1	88233128	0.00350893	23.8567	A	G	0.129218	0.0264518	1.01e-06	6777	A	G	-0.000651621	0.000462238	0.16	462933
genus.Coprobacter.id.949	rs3828477	3	46483717	0.00318606	21.7217	G	T	-0.091218	0.019569	2.89e-06	6798	G	T	-0.000737013	0.000340421	0.0299999	462933
genus.Coprobacter.id.949	rs5011652	15	91166608	0.00297358	20.224	G	C	0.0899597	0.020001	5.51e-06	6783	G	C	0.000330546	0.000340382	0.33	462933
genus.Coprobacter.id.949	rs55672356	4	34852443	0.00443306	21.8232	T	A	-0.193354	0.0413815	2.74e-06	4903	T	A	-0.000936499	0.000631081	0.14	462933
genus.Coprobacter.id.949	rs72821405	6	4714797	0.00342203	21.2036	T	C	-0.147365	0.0319978	4.76e-06	6177	T	C	-0.000653909	0.000523456	0.21	462933
genus.Coprobacter.id.949	rs74919520	2	32242452	0.00323028	20.6922	G	A	0.125703	0.0276296	5.76e-06	6387	G	A	-0.000128806	0.000454989	0.780001	462933
genus.Coprobacter.id.949	rs76001613	4	3852385	0.00563389	19.1674	C	G	0.21591	0.0493019	9.13e-06	3385	C	G	0.000120729	0.000568148	0.83	462933
genus.Coprococcus1.id.11301	rs1010560	1	30400301	0.00133496	22.3517	C	A	0.0580232	0.0122722	1.96e-06	16723	C	A	-4.58178e-05	0.00031751	0.89	462933
genus.Coprococcus1.id.11301	rs12794898	11	124554061	0.0013796	20.9767	G	T	0.0903299	0.0197212	4.92e-06	15186	G	T	0.000924095	0.000534838	0.0840001	462933
genus.Coprococcus1.id.11301	rs12886051	14	29898456	0.00117317	19.5339	G	C	-0.0521782	0.0118051	8.01e-06	16633	G	C	-0.000387759	0.000309445	0.21	462933
genus.Coprococcus1.id.11301	rs1519491	2	22079770	0.00115355	19.3223	T	C	0.0499197	0.0113558	8.95e-06	16733	T	C	-0.000145687	0.000295471	0.62	462933
genus.Coprococcus1.id.11301	rs1576241	6	72529277	0.00129595	21.7056	A	G	-0.0510343	0.0109535	3.33e-06	16729	A	G	-0.00042238	0.000291897	0.15	462933
genus.Coprococcus1.id.11301	rs1762123	6	150288094	0.00120407	20.1588	C	T	-0.0891532	0.0198554	8.01e-06	16724	C	T	-0.00031425	0.000635203	0.62	462933
genus.Coprococcus1.id.11301	rs2907920	19	2600717	0.00121915	19.5766	A	G	0.0561173	0.0126824	7.65e-06	16040	A	G	0.000115594	0.000324604	0.719999	462933
genus.Coprococcus1.id.11301	rs4277593	20	4319420	0.00170213	28.387	G	A	-0.0585649	0.0109914	1.14e-07	16651	G	A	0.000281044	0.000291281	0.33	462933
genus.Coprococcus1.id.11301	rs56405618	4	174468316	0.00140803	23.0918	A	G	-0.08963	0.0186508	1.57e-06	16379	A	G	0.000278345	0.000485618	0.57	462933
genus.Coprococcus1.id.11301	rs73031725	11	134622282	0.00307938	22.2524	T	C	0.167591	0.0355224	1.98e-06	7206	T	C	-0.000493551	0.000727256	0.5	462933
genus.Coprococcus1.id.11301	rs73167075	3	165693143	0.00120476	20.1812	T	C	0.0573137	0.0127573	8.57e-06	16733	T	C	0.000433456	0.000343956	0.21	462933
genus.Coprococcus1.id.11301	rs74101919	1	95424321	0.00147439	24.7029	T	C	-0.0718989	0.0144651	1.03e-06	16732	T	C	-1.60445e-05	0.000375306	0.97	462933
genus.Coprococcus1.id.11301	rs7784490	7	132556835	0.00125386	21.0047	C	G	-0.0518543	0.0113136	4.55e-06	16733	C	G	0.000260735	0.00030059	0.39	462933
genus.Coprococcus1.id.11301	rs946513	10	15913820	0.00462666	20.0243	C	T	0.205899	0.0460018	8.62e-06	4310	C	T	-0.000518918	0.000625526	0.41	462933
genus.Coprococcus3.id.11303	rs10810043	9	13799809	0.00124751	19.7739	A	G	0.0515518	0.0115923	9.27e-06	15833	A	G	-9.60011e-05	0.000300727	0.75	462933
genus.Coprococcus3.id.11303	rs11077359	17	76343961	0.00122148	18.8044	T	C	-0.0645443	0.0148833	9.64e-06	15378	T	C	-0.000163696	0.000357352	0.649999	462933
genus.Coprococcus3.id.11303	rs11080344	17	26104511	0.00131851	20.9036	C	T	0.0516921	0.0113054	4.79e-06	15835	C	T	0.000522243	0.0002947	0.0759994	462933
genus.Coprococcus3.id.11303	rs13247359	7	76357726	0.00129481	20.5247	G	A	0.051211	0.0113031	7.33e-06	15833	G	A	0.00012863	0.000290764	0.66	462933
genus.Coprococcus3.id.11303	rs13394391	2	240727657	0.00139311	22.0864	C	T	-0.0709302	0.0150918	2.2e-06	15834	C	T	0.000372877	0.000390275	0.34	462933
genus.Coprococcus3.id.11303	rs178271	22	21331556	0.00225275	24.3665	T	C	0.145257	0.0294239	7.81e-07	10794	T	C	7.85809e-05	0.000627487	0.9	462933
genus.Coprococcus3.id.11303	rs4575475	14	99141751	0.00133223	20.2128	G	A	0.0619514	0.0137787	7.04e-06	15154	G	A	-0.000164602	0.00035074	0.64	462933
genus.Coprococcus3.id.11303	rs62481985	8	4128340	0.00165335	25.6197	G	C	-0.0582385	0.0115052	4.18e-07	15472	G	C	0.000140811	0.000295705	0.630001	462933
genus.Coprococcus3.id.11303	rs7521171	1	149998497	0.00137382	21.2822	G	A	-0.0596434	0.0129279	4.32e-06	15472	G	A	0.000510091	0.00032793	0.12	462933
genus.Coprococcus3.id.11303	rs8100692	19	40032132	0.00163305	25.8885	T	C	0.0577411	0.0113476	4.16e-07	15829	T	C	-0.000241142	0.000294548	0.41	462933
genus.DefluviitaleaceaeUCG011.id.11287	rs112893842	9	8786663	0.00291203	23.8929	T	C	0.11381	0.0232806	1.45e-06	8183	T	C	4.75787e-05	0.000444082	0.91	462933
genus.DefluviitaleaceaeUCG011.id.11287	rs1582238	1	118723685	0.0028936	23.1609	T	C	0.0805036	0.0167257	1.57e-06	7983	T	C	-9.42659e-05	0.00031115	0.760001	462933
genus.DefluviitaleaceaeUCG011.id.11287	rs28696126	7	79734541	0.00254701	19.9404	A	T	-0.106503	0.0238473	6.63e-06	7811	A	T	0.00057313	0.000435004	0.19	462933
genus.DefluviitaleaceaeUCG011.id.11287	rs2892880	4	120741726	0.00246984	20.2533	G	A	0.0817755	0.0181686	6.83e-06	8182	G	A	0.000344765	0.000337104	0.31	462933
genus.DefluviitaleaceaeUCG011.id.11287	rs4344384	10	66407366	0.00255838	20.9761	G	T	0.0715978	0.0156309	4.83e-06	8180	G	T	-0.000310418	0.00029247	0.29	462933
genus.DefluviitaleaceaeUCG011.id.11287	rs4677103	3	72207794	0.00306906	24.5696	A	G	0.0977912	0.0197263	9.6e-07	7983	A	G	-0.000391172	0.00037946	0.3	462933
genus.DefluviitaleaceaeUCG011.id.11287	rs55658617	21	41811003	0.00346579	23.1659	T	C	0.174369	0.0362226	2.15e-06	6663	T	C	-0.000208649	0.000538563	0.7	462933
genus.DefluviitaleaceaeUCG011.id.11287	rs72731813	4	147414743	0.00322957	25.1588	C	T	-0.147383	0.0293796	4.33e-07	7767	C	T	0.000820224	0.000529606	0.12	462933
genus.DefluviitaleaceaeUCG011.id.11287	rs9608282	22	24804081	0.00293758	22.7273	T	G	0.142939	0.0299793	2.52e-06	7716	T	G	-0.000461858	0.000549515	0.4	462933
genus.DefluviitaleaceaeUCG011.id.11287	rs9725395	1	85205632	0.00272765	21.9055	A	G	-0.13834	0.029554	3.52e-06	8011	A	G	0.000768532	0.00054084	0.16	462933
genus.Desulfovibrio.id.3173	rs11160353	14	97116904	0.00238321	22.0543	T	A	-0.0691756	0.0147285	2.7e-06	9234	T	A	-9.38379e-05	0.000292453	0.75	462933
genus.Desulfovibrio.id.3173	rs12031543	1	68664315	0.00229369	20.3527	T	C	-0.127185	0.0281887	6.55e-06	8855	T	C	-0.000538381	0.000627093	0.39	462933
genus.Desulfovibrio.id.3173	rs13066142	3	67478973	0.0024343	22.5453	G	A	0.119141	0.0250891	3.79e-06	9241	G	A	-0.000379998	0.000529718	0.47	462933
genus.Desulfovibrio.id.3173	rs16863365	2	198089911	0.00264056	23.2296	A	G	0.109402	0.0226964	1.79e-06	8776	A	G	0.00099561	0.000434375	0.0219999	462933
genus.Desulfovibrio.id.3173	rs2032031	10	130170270	0.00209532	19.3993	A	G	-0.0654931	0.0148681	9.14e-06	9241	A	G	0.000514628	0.000292904	0.0790005	462933
genus.Desulfovibrio.id.3173	rs2590913	13	64264446	0.0028598	20.7156	G	A	0.154496	0.0339396	6.65e-06	7225	G	A	7.09456e-06	0.000538609	0.99	462933
genus.Desulfovibrio.id.3173	rs2853179	8	105462047	0.00242095	21.7128	C	T	0.0811971	0.0174234	2.42e-06	8949	C	T	-6.24463e-05	0.000346459	0.86	462933
genus.Desulfovibrio.id.3173	rs4797774	18	13447995	0.00584988	20.4421	G	A	0.212582	0.0470044	5.64e-06	3476	G	A	3.91835e-05	0.000701225	0.96	462933
genus.Desulfovibrio.id.3173	rs6580353	5	139410687	0.00222768	20.6275	T	C	0.0770979	0.0169735	4.94e-06	9241	T	C	-0.000291503	0.000356021	0.41	462933
genus.Desulfovibrio.id.3173	rs72647089	8	57972916	0.0022028	19.8314	T	G	-0.106594	0.0239337	8.3e-06	8985	T	G	-0.000270408	0.000490624	0.58	462933
genus.Desulfovibrio.id.3173	rs7729080	5	52653978	0.00214528	19.8628	C	A	-0.070287	0.0157691	9.96e-06	9241	C	A	-0.000490222	0.000313261	0.12	462933
genus.Dialister.id.2183	rs10138457	14	102458052	0.00169561	18.6257	T	C	-0.113054	0.0261933	7.88e-06	10968	T	C	0.000154341	0.000583429	0.79	462933
genus.Dialister.id.2183	rs10938938	4	23294359	0.00179331	20.4786	G	A	-0.0773514	0.0170915	7.37e-06	11401	G	A	0.000233958	0.000371241	0.53	462933
genus.Dialister.id.2183	rs11071887	15	32955095	0.00170664	20.4925	T	C	0.0662403	0.0146315	5.91e-06	11989	T	C	-0.000113348	0.000327034	0.73	462933
genus.Dialister.id.2183	rs11166701	8	138295725	0.00210288	24.6934	G	A	-0.0655301	0.013186	5.51e-07	11720	G	A	8.7071e-05	0.000291784	0.77	462933
genus.Dialister.id.2183	rs2314294	16	9336862	0.00175907	19.9778	T	C	0.0865932	0.0193719	8.08e-06	11339	T	C	0.000115092	0.000419471	0.780001	462933
genus.Dialister.id.2183	rs2435610	7	150890034	0.0016985	20.3861	A	C	0.0647131	0.0143314	5.93e-06	11984	A	C	0.000210222	0.000323541	0.52	462933
genus.Dialister.id.2183	rs4747450	10	23199653	0.00170642	20.4864	C	A	0.0668509	0.0147685	5.84e-06	11987	C	A	0.000278071	0.000330591	0.4	462933
genus.Dialister.id.2183	rs4753063	11	92267129	0.00175044	21.0194	G	A	-0.0596297	0.0130052	4.86e-06	11989	G	A	-0.000161691	0.000293177	0.58	462933
genus.Dialister.id.2183	rs517089	11	10967286	0.00166629	20.0055	T	A	0.076227	0.0170411	5.14e-06	11988	T	A	-0.000179785	0.000375786	0.630001	462933
genus.Dialister.id.2183	rs75416973	1	172809633	0.00171091	19.5378	A	G	0.0727223	0.016451	9.46e-06	11402	A	G	0.000169872	0.000373755	0.649999	462933
genus.Dialister.id.2183	rs764177	3	45809449	0.00164409	19.7385	C	A	-0.0601454	0.0135366	9.61e-06	11988	C	A	-0.000171816	0.000312235	0.58	462933
genus.Dialister.id.2183	rs76680460	9	25447080	0.00272387	19.5944	G	A	-0.161296	0.0364332	8.19e-06	7176	G	A	-0.000522514	0.000658115	0.43	462933
genus.Dorea.id.1997	rs11150408	16	81803497	0.00116284	20.0393	T	G	0.0488254	0.0109063	7.06e-06	17215	T	G	0.000401622	0.000291977	0.17	462933
genus.Dorea.id.1997	rs12216169	6	116078810	0.00128669	20.7217	T	A	0.0881722	0.0193683	5.33e-06	16086	T	A	-7.64649e-05	0.000512904	0.88	462933
genus.Dorea.id.1997	rs12537781	7	154978183	0.00111612	19.6724	T	C	-0.055544	0.0125223	9.15e-06	17608	T	C	-0.000162686	0.000331372	0.62	462933
genus.Dorea.id.1997	rs13279148	8	127905865	0.00127511	22.4744	G	A	0.0715309	0.0150878	2.25e-06	17605	G	A	-0.000488262	0.000399902	0.22	462933
genus.Dorea.id.1997	rs1899291	4	60992340	0.00122079	21.5208	C	T	0.0697217	0.0150285	4.57e-06	17609	C	T	0.000517178	0.000434549	0.23	462933
genus.Dorea.id.1997	rs3005511	6	74605806	0.00118636	20.9143	A	G	0.0516127	0.0112852	5.29e-06	17610	A	G	3.72467e-05	0.000308009	0.9	462933
genus.Dorea.id.1997	rs345219	3	6826520	0.00113167	19.5015	T	G	-0.0497368	0.0112621	8.8e-06	17215	T	G	-0.00035277	0.000306754	0.25	462933
genus.Dorea.id.1997	rs3752849	11	8729057	0.00374984	20.0242	G	A	0.163846	0.036608	7.68e-06	5322	G	A	-0.00131941	0.000746828	0.0769999	462933
genus.Dorea.id.1997	rs4793307	17	70733523	0.00124723	21.9762	C	T	0.0574165	0.0122472	4.01e-06	17600	C	T	-0.000161744	0.000331359	0.630001	462933
genus.Dorea.id.1997	rs62503162	8	15768657	0.00154684	25.11	A	G	-0.0974091	0.0194379	7.47e-07	16210	A	G	-0.00135955	0.000513737	0.00809991	462933
genus.Dorea.id.1997	rs62583469	9	106815466	0.00118056	19.8769	T	A	-0.0634136	0.0142227	5.78e-06	16819	T	A	-0.000202093	0.000362371	0.58	462933
genus.Dorea.id.1997	rs73729431	6	25078050	0.00218302	20.9897	C	T	-0.13745	0.0299983	3.17e-06	9596	C	T	-0.000220288	0.000631085	0.73	462933
genus.Eggerthella.id.819	rs112205261	1	9136139	0.00431788	21.8305	T	C	-0.188618	0.0403613	3.35e-06	5036	T	C	0.000186331	0.000590899	0.75	462933
genus.Eggerthella.id.819	rs13070736	3	20807454	0.00385035	19.8866	A	C	-0.121331	0.0272024	7.62e-06	5147	A	C	-0.000596623	0.000417976	0.15	462933
genus.Eggerthella.id.819	rs1784446	11	102461599	0.00406292	20.989	G	A	0.0907728	0.0198096	5.23e-06	5147	G	A	-0.000103614	0.000294499	0.719999	462933
genus.Eggerthella.id.819	rs2223081	21	29778032	0.00416372	21.5119	G	A	0.102572	0.0221108	3.89e-06	5147	G	A	4.98796e-05	0.00033421	0.88	462933
genus.Eggerthella.id.819	rs2240838	7	38335954	0.00475922	24.6033	A	G	0.0980582	0.0197653	7.36e-07	5147	A	G	0.000222138	0.000296814	0.450001	462933
genus.Eggerthella.id.819	rs2877457	4	70483957	0.00387606	19.7709	G	A	-0.093486	0.0210208	9.03e-06	5083	G	A	-7.21927e-05	0.00032018	0.82	462933
genus.Eggerthella.id.819	rs3851328	2	45453805	0.0040176	20.754	T	G	-0.107774	0.0236527	4.18e-06	5147	T	G	-0.00016102	0.000342993	0.64	462933
genus.Eggerthella.id.819	rs4985746	17	17098213	0.00404322	19.9084	G	A	0.110522	0.0247653	5.71e-06	4906	G	A	0.000430699	0.000351492	0.22	462933
genus.Eggerthella.id.819	rs6430926	2	141337454	0.0038546	19.9087	C	T	0.0879736	0.0197127	8.37e-06	5147	C	T	-0.000735566	0.000291712	0.012	462933
genus.Eggerthella.id.819	rs67490567	15	65691324	0.00382895	19.5297	T	C	0.108495	0.0245457	8.94e-06	5083	T	C	-0.000739435	0.000378154	0.051	462933
genus.Eggerthella.id.819	rs76663501	20	55647869	0.00443674	21.4448	C	T	0.175349	0.0378576	4.83e-06	4814	C	T	0.00076984	0.0005092	0.13	462933
genus.Eisenbergiella.id.11304	rs11027642	11	24001840	0.00366052	20.5044	C	T	0.129006	0.0284844	4.92e-06	5583	C	T	3.17069e-05	0.000444611	0.94	462933
genus.Eisenbergiella.id.11304	rs11079158	17	53367641	0.0035559	19.9128	T	C	0.100627	0.022546	7.35e-06	5582	T	C	0.000987075	0.000341045	0.00379997	462933
genus.Eisenbergiella.id.11304	rs11938607	4	189060431	0.00363813	20.3786	T	C	0.0978125	0.0216636	8.22e-06	5583	T	C	-0.000249021	0.000345893	0.47	462933
genus.Eisenbergiella.id.11304	rs12257723	10	109417101	0.00361978	20.2717	A	C	-0.0952742	0.0211569	8.85e-06	5582	A	C	-0.000227047	0.000323902	0.48	462933
genus.Eisenbergiella.id.11304	rs12278566	11	124764527	0.00412883	23.1344	T	A	-0.121065	0.0251658	1.65e-06	5582	T	A	-5.58443e-05	0.00039952	0.89	462933
genus.Eisenbergiella.id.11304	rs12710729	2	19973210	0.00359448	20.1332	C	A	0.0893384	0.0199069	9.84e-06	5583	C	A	-0.000288408	0.000305946	0.35	462933
genus.Eisenbergiella.id.11304	rs13258851	8	55330814	0.00366957	20.5553	A	G	0.137001	0.0302124	7.75e-06	5583	A	G	-0.000103154	0.000482758	0.83	462933
genus.Eisenbergiella.id.11304	rs1508033	15	53375201	0.00390284	21.8553	A	C	0.091546	0.0195787	3.23e-06	5580	A	C	0.000310851	0.000304988	0.31	462933
genus.Eisenbergiella.id.11304	rs1553971	3	111419486	0.00377325	21.1383	T	G	0.120965	0.0263054	5.27e-06	5583	T	G	0.000490958	0.000407932	0.23	462933
genus.Eisenbergiella.id.11304	rs2683098	15	36178565	0.00405372	22.7118	C	T	0.107319	0.022515	2.24e-06	5582	C	T	-0.000504832	0.000356466	0.16	462933
genus.Eisenbergiella.id.11304	rs3812426	8	50822676	0.0040229	22.5425	G	A	0.106447	0.0224159	2.72e-06	5583	G	A	-0.000280745	0.000344888	0.42	462933
genus.Eisenbergiella.id.11304	rs4462860	21	21610254	0.00397769	21.7969	G	A	0.0939071	0.0201104	4.16e-06	5460	G	A	-0.000234362	0.000310759	0.450001	462933
genus.Enterorhabdus.id.820	rs10098492	8	113109756	0.00275021	20.2946	T	C	0.132323	0.0293688	6.41e-06	7361	T	C	0.000218813	0.000510687	0.67	462933
genus.Enterorhabdus.id.820	rs11098863	4	127336602	0.00466477	35.2528	T	A	-0.0966008	0.0162677	3.06e-09	7524	T	A	4.16295e-05	0.000291813	0.89	462933
genus.Enterorhabdus.id.820	rs114731706	2	19611953	0.00380363	22.7333	T	G	0.182308	0.0382298	2.17e-06	5956	T	G	0.000768875	0.000634696	0.23	462933
genus.Enterorhabdus.id.820	rs2051957	7	89709883	0.00261507	19.7221	C	T	0.0843291	0.0189864	8.9e-06	7524	C	T	0.000224233	0.000332999	0.5	462933
genus.Enterorhabdus.id.820	rs3017103	11	62174193	0.00291916	22.0222	A	G	0.0980897	0.0208995	2.94e-06	7524	A	G	-0.000562489	0.000378974	0.14	462933
genus.Enterorhabdus.id.820	rs424715	19	35863028	0.00290555	21.9192	T	C	0.0818743	0.0174855	4.41e-06	7524	T	C	4.84166e-05	0.000340901	0.89	462933
genus.Enterorhabdus.id.820	rs73331712	12	69515102	0.00721335	22.5747	T	C	0.26199	0.055123	4.85e-06	3109	T	C	-0.000480004	0.000688239	0.49	462933
genus.Enterorhabdus.id.820	rs77655283	2	236439879	0.00264506	19.8694	G	A	0.132988	0.0298306	5.88e-06	7494	G	A	-0.000336949	0.000557535	0.55	462933
genus.Enterorhabdus.id.820	rs7923280	10	20280612	0.00342407	25.8443	A	T	0.0860019	0.0169148	5.24e-07	7524	A	T	0.000509851	0.000300668	0.0899995	462933
genus.Enterorhabdus.id.820	rs9470637	6	37567189	0.00273687	20.6432	A	T	-0.0755513	0.0166263	5.7e-06	7524	A	T	-8.7114e-05	0.000297083	0.77	462933
genus.ErysipelotrichaceaeUCG003.id.11384	rs10164067	18	46614602	0.00163549	23.6306	T	G	-0.10326	0.0212405	1.13e-06	14427	T	G	0.000333237	0.000514296	0.52	462933
genus.ErysipelotrichaceaeUCG003.id.11384	rs11666127	19	57828980	0.0014359	19.8597	A	G	-0.0719187	0.0161371	7.9e-06	13813	A	G	0.00078881	0.00039642	0.0470002	462933
genus.ErysipelotrichaceaeUCG003.id.11384	rs11994308	8	91660344	0.00166797	22.6488	C	T	0.115417	0.0242503	1.33e-06	13558	C	T	0.000516681	0.000604828	0.39	462933
genus.ErysipelotrichaceaeUCG003.id.11384	rs12251396	10	873148	0.00138716	19.7376	A	G	-0.0705399	0.0158766	9.52e-06	14211	A	G	-0.000410177	0.00038168	0.28	462933
genus.ErysipelotrichaceaeUCG003.id.11384	rs17798136	7	33684926	0.00280395	20.861	G	A	0.158818	0.0347674	3.24e-06	7421	G	A	6.17257e-05	0.000723559	0.93	462933
genus.ErysipelotrichaceaeUCG003.id.11384	rs28568391	10	125628540	0.00165993	24.1788	A	G	-0.0583911	0.0118741	6.42e-07	14544	A	G	-0.000243239	0.000294916	0.41	462933
genus.ErysipelotrichaceaeUCG003.id.11384	rs4758231	11	7765096	0.00137072	20.4353	G	T	-0.0551754	0.0122047	6.55e-06	14890	G	T	6.50394e-05	0.000314169	0.84	462933
genus.ErysipelotrichaceaeUCG003.id.11384	rs59068084	4	113256737	0.00151504	22.0651	T	G	0.0564772	0.0120224	3.12e-06	14544	T	G	0.000393166	0.000296016	0.18	462933
genus.ErysipelotrichaceaeUCG003.id.11384	rs59104037	18	43034126	0.00145174	21.5838	A	G	-0.0951263	0.0204742	4.48e-06	14848	A	G	2.95067e-05	0.000512932	0.95	462933
genus.ErysipelotrichaceaeUCG003.id.11384	rs62403464	6	24220160	0.0014649	21.8546	T	C	-0.0731743	0.0156516	3.44e-06	14899	T	C	-0.000347758	0.000392263	0.38	462933
genus.ErysipelotrichaceaeUCG003.id.11384	rs6875357	5	32345671	0.00310713	21.9175	C	T	0.165673	0.0353831	6.7e-06	7034	C	T	0.000942312	0.000707476	0.18	462933
genus.ErysipelotrichaceaeUCG003.id.11384	rs73074432	7	20554814	0.00135344	19.2652	C	T	0.072154	0.0164378	9.99e-06	14217	C	T	-0.000469185	0.000402142	0.24	462933
genus.ErysipelotrichaceaeUCG003.id.11384	rs74988980	16	80167277	0.00244845	14.5844	G	A	-0.133141	0.0348574	8.64e-06	5944	G	A	0.00140374	0.000692566	0.0430002	462933
genus.ErysipelotrichaceaeUCG003.id.11384	rs75949021	2	175403951	0.00304887	20.548	T	C	-0.169667	0.0374238	3.58e-06	6721	T	C	0.00017972	0.000653161	0.780001	462933
genus.ErysipelotrichaceaeUCG003.id.11384	rs76502207	15	86522244	0.00231848	24.9537	T	C	0.144844	0.0289929	6.41e-07	10740	T	C	-0.000268509	0.000606745	0.66	462933
genus.ErysipelotrichaceaeUCG003.id.11384	rs79396538	14	47935928	0.00142984	19.6855	C	G	0.0848148	0.0191146	8.63e-06	13750	C	G	-0.000800204	0.000459116	0.0810009	462933
genus.ErysipelotrichaceaeUCG003.id.11384	rs8053479	16	4076830	0.00146011	20.195	A	G	-0.0838212	0.0186509	5.83e-06	13813	A	G	0.000412133	0.000448468	0.36	462933
genus.Escherichia.Shigella.id.3504	rs112767262	16	3750623	0.00170257	20.0717	T	C	0.0732963	0.0163589	8.21e-06	11771	T	C	-0.000403828	0.000374371	0.28	462933
genus.Escherichia.Shigella.id.3504	rs113127095	13	23253392	0.00257829	21.7938	A	G	0.151009	0.0323434	3.33e-06	8433	A	G	0.000108404	0.000617101	0.86	462933
genus.Escherichia.Shigella.id.3504	rs113513883	7	140678199	0.00325541	20.5042	A	G	0.172283	0.038041	5.28e-06	6280	A	G	-0.000390819	0.000622531	0.53	462933
genus.Escherichia.Shigella.id.3504	rs1154904	11	134774845	0.00183325	22.0395	A	G	-0.0613376	0.0130644	3.04e-06	12002	A	G	-0.000240789	0.000292208	0.41	462933
genus.Escherichia.Shigella.id.3504	rs11706043	3	3173016	0.00176687	21.2381	T	A	0.075657	0.0164155	5.87e-06	12001	T	A	0.000185567	0.000381052	0.630001	462933
genus.Escherichia.Shigella.id.3504	rs117092367	10	69394914	0.0019066	19.6793	A	T	0.117362	0.0264533	9.65e-06	10304	A	T	0.000472007	0.0005427	0.38	462933
genus.Escherichia.Shigella.id.3504	rs118526	5	79863544	0.00160946	19.1045	C	A	-0.0594401	0.013598	8e-06	11853	C	A	-0.000506074	0.000296498	0.0879995	462933
genus.Escherichia.Shigella.id.3504	rs2267739	7	31136897	0.00198938	23.6231	G	C	0.115505	0.0237628	1.42e-06	11853	G	C	-0.000182239	0.000555499	0.74	462933
genus.Escherichia.Shigella.id.3504	rs2798105	1	48961903	0.00182289	20.6253	A	G	-0.100851	0.0222045	8.25e-06	11296	A	G	-0.000712565	0.000495147	0.15	462933
genus.Escherichia.Shigella.id.3504	rs35555519	16	77711641	0.00174113	20.93	C	G	0.101976	0.0222883	4.92e-06	12002	C	G	0.00103579	0.000530662	0.051	462933
genus.Escherichia.Shigella.id.3504	rs4731451	7	128054100	0.00169381	20.3585	G	A	-0.0609885	0.0135157	7.47e-06	12001	G	A	-0.000482135	0.000303799	0.11	462933
genus.Escherichia.Shigella.id.3504	rs57024273	2	236515155	0.00168684	20.0246	T	C	0.0626172	0.0139919	9.7e-06	11853	T	C	-0.000320171	0.000323239	0.32	462933
genus.Escherichia.Shigella.id.3504	rs592299	9	136179347	0.00173958	20.8992	T	C	-0.0592004	0.0129486	4.77e-06	11995	T	C	0.00192995	0.000292283	4.00037e-11	462933
genus.Escherichia.Shigella.id.3504	rs73208162	21	39324484	0.0020788	23.0623	A	G	-0.119296	0.024839	2.19e-06	11073	A	G	-0.000994629	0.000572003	0.0819993	462933
genus.Escherichia.Shigella.id.3504	rs7502686	17	14173290	0.00202958	20.3127	G	C	-0.136384	0.0302576	5.9e-06	9990	G	C	0.0007513	0.000621085	0.23	462933
genus.Faecalibacterium.id.2057	rs114946999	2	37125235	0.00131575	20.6463	C	T	-0.0861565	0.01896	5.7e-06	15673	C	T	0.000435512	0.000500875	0.38	462933
genus.Faecalibacterium.id.2057	rs11776390	8	38593645	0.00124222	20.7907	T	C	-0.078354	0.017183	6.4e-06	16718	T	C	0.00038145	0.000461328	0.41	462933
genus.Faecalibacterium.id.2057	rs12320842	12	83502773	0.00189304	33.4489	C	G	0.094833	0.0163962	7.57e-09	17638	C	G	0.000393359	0.000462545	0.4	462933
genus.Faecalibacterium.id.2057	rs1271565	14	64044097	0.00131336	23.1929	C	T	-0.0576251	0.0119649	1.3e-06	17638	C	T	0.000491196	0.00032657	0.13	462933
genus.Faecalibacterium.id.2057	rs12753492	1	14201546	0.00104285	18.2929	A	C	0.0641305	0.0149933	8.8e-06	17525	A	C	-0.00038142	0.000400458	0.34	462933
genus.Faecalibacterium.id.2057	rs2835874	21	39027901	0.00110537	19.4374	T	C	-0.0866356	0.0196496	7.54e-06	17567	T	C	-0.000618445	0.00055832	0.27	462933
genus.Faecalibacterium.id.2057	rs28376661	15	47404021	0.00117655	21.303	C	G	0.0504817	0.0109368	3.66e-06	18087	C	G	-0.000267268	0.000299192	0.37	462933
genus.Faecalibacterium.id.2057	rs61875484	10	128614990	0.00118464	19.8259	C	G	0.0817953	0.018369	9.18e-06	16718	C	G	0.000266843	0.000499692	0.59	462933
genus.Faecalibacterium.id.2057	rs6910935	6	131587157	0.00187142	23.6954	A	G	0.134864	0.0277032	1.38e-06	12640	A	G	-0.000683014	0.000619384	0.27	462933
genus.Faecalibacterium.id.2057	rs75499067	16	6099863	0.00525295	23.8899	C	T	0.227585	0.0465522	1.76e-06	4526	C	T	0.000890427	0.000667485	0.18	462933
genus.Faecalibacterium.id.2057	rs79656633	1	111036827	0.00223354	20.3215	T	C	0.145631	0.0323019	8.14e-06	9080	T	C	0.000337581	0.000685551	0.62	462933
genus.Faecalibacterium.id.2057	rs9536330	13	53567017	0.00110628	20.0237	T	C	-0.048317	0.010797	5.33e-06	18082	T	C	-0.000110394	0.000299962	0.709999	462933
genus.FamilyXIIIAD3011group.id.11293	rs11126423	2	74195551	0.00154303	21.2232	C	T	0.0904399	0.0196301	5.91e-06	13735	C	T	0.00055486	0.000487871	0.26	462933
genus.FamilyXIIIAD3011group.id.11293	rs11736617	4	38917830	0.00141151	19.4724	G	A	-0.0759493	0.0172101	9.02e-06	13778	G	A	0.000772315	0.000445288	0.0830004	462933
genus.FamilyXIIIAD3011group.id.11293	rs12812672	12	18127597	0.00156579	21.2701	T	C	-0.096065	0.020828	2.56e-06	13565	T	C	0.000269604	0.00050795	0.6	462933
genus.FamilyXIIIAD3011group.id.11293	rs12911842	15	40047706	0.00138676	19.6125	A	T	-0.0811976	0.0183335	6.91e-06	14125	A	T	-0.000136962	0.000442691	0.760001	462933
genus.FamilyXIIIAD3011group.id.11293	rs149302	5	14159925	0.00142979	20.3178	T	C	-0.0645635	0.0143225	7.48e-06	14192	T	C	-0.000388621	0.000358059	0.28	462933
genus.FamilyXIIIAD3011group.id.11293	rs16840310	1	240694163	0.00174191	24.7765	A	G	-0.0608052	0.0122149	6.75e-07	14201	A	G	0.000440842	0.000303811	0.15	462933
genus.FamilyXIIIAD3011group.id.11293	rs16940167	15	58683697	0.00147581	20.986	C	T	0.0732552	0.0159898	3.91e-06	14201	C	T	-0.000597124	0.000401123	0.14	462933
genus.FamilyXIIIAD3011group.id.11293	rs17156849	7	28603985	0.00158385	21.178	G	A	-0.112891	0.0245292	4.19e-06	13352	G	A	-0.000440708	0.000555152	0.43	462933
genus.FamilyXIIIAD3011group.id.11293	rs62029761	16	16006242	0.00224885	21.757	A	G	0.128753	0.0276002	3.89e-06	9655	A	G	0.000770675	0.000635429	0.23	462933
genus.FamilyXIIIAD3011group.id.11293	rs62200412	20	4618639	0.00174603	23.8908	C	T	-0.0800851	0.0163834	5.8e-07	13661	C	T	-0.0004417	0.000400705	0.27	462933
genus.FamilyXIIIAD3011group.id.11293	rs72730932	1	192019835	0.00196516	25.7943	C	A	-0.0899559	0.0177107	6.89e-07	13102	C	A	-0.000284554	0.000402166	0.48	462933
genus.FamilyXIIIAD3011group.id.11293	rs739451	9	136678954	0.00136365	19.3834	C	T	0.0649589	0.0147534	7.88e-06	14197	C	T	-0.000477861	0.000362747	0.19	462933
genus.FamilyXIIIAD3011group.id.11293	rs9276029	6	32695336	0.00140577	19.0947	A	G	-0.0811384	0.0185669	8.93e-06	13566	A	G	0.00030545	0.00042646	0.47	462933
genus.FamilyXIIIAD3011group.id.11293	rs9837139	3	29811865	0.00147562	19.9872	A	G	0.10752	0.0240482	8.71e-06	13527	A	G	-0.00032826	0.000590616	0.58	462933
genus.FamilyXIIIAD3011group.id.11293	rs9852893	3	3556826	0.00182844	25.9785	C	G	0.0657834	0.0129056	3.88e-07	14184	C	G	-0.000399108	0.000319705	0.21	462933
genus.FamilyXIIIUCG001.id.11294	rs112362903	17	33761027	0.00232596	19.9963	A	G	-0.149047	0.0333271	7.88e-06	8579	A	G	-0.000590221	0.000692459	0.39	462933
genus.FamilyXIIIUCG001.id.11294	rs116979587	15	25151194	0.00181207	21.7608	T	A	-0.121679	0.0260821	3.05e-06	11989	T	A	0.000543193	0.000564432	0.34	462933
genus.FamilyXIIIUCG001.id.11294	rs12049454	1	85228325	0.00182532	23.3081	T	C	-0.0647298	0.0134065	1.17e-06	12748	T	C	2.22231e-06	0.000314845	0.99	462933
genus.FamilyXIIIUCG001.id.11294	rs1426266	3	188224096	0.00184324	23.5429	T	C	-0.0665521	0.0137151	1.25e-06	12751	T	C	-4.3727e-05	0.000319137	0.89	462933
genus.FamilyXIIIUCG001.id.11294	rs2276529	21	45153079	0.0016569	21.1539	C	G	-0.0759406	0.0165099	5.36e-06	12748	C	G	0.00040416	0.000394353	0.31	462933
genus.FamilyXIIIUCG001.id.11294	rs3842897	1	183503664	0.00173236	21.5272	G	A	-0.112639	0.0242751	5.2e-06	12407	G	A	0.000768179	0.000562198	0.17	462933
genus.FamilyXIIIUCG001.id.11294	rs62414802	6	76598635	0.00161904	20.673	C	T	-0.0611904	0.013457	4.29e-06	12750	C	T	-0.000391054	0.000307003	0.2	462933
genus.FamilyXIIIUCG001.id.11294	rs7119679	11	94681786	0.00171891	21.4252	G	A	-0.0809085	0.0174782	3.52e-06	12445	G	A	0.000581288	0.000416351	0.16	462933
genus.FamilyXIIIUCG001.id.11294	rs76463770	3	45479090	0.00373017	21.1506	A	G	0.19313	0.0419866	3.77e-06	5651	A	G	0.000341495	0.000687886	0.62	462933
genus.FamilyXIIIUCG001.id.11294	rs8076666	17	78223817	0.00163037	20.0259	A	G	0.088655	0.0198094	8.02e-06	12265	A	G	-0.000206677	0.000469715	0.66	462933
genus.Flavonifractor.id.2059	rs114873521	5	168218403	0.00213181	19.5563	C	T	-0.130067	0.0294087	7.13e-06	9156	C	T	0.00100334	0.000596385	0.0920005	462933
genus.Flavonifractor.id.2059	rs11642826	16	6696929	0.00249595	20.3904	G	C	0.14686	0.0325191	6.65e-06	8151	G	C	-0.00043072	0.000646652	0.51	462933
genus.Flavonifractor.id.2059	rs11811696	1	237351354	0.00226377	23.1859	T	C	-0.116063	0.0241012	2.07e-06	10221	T	C	0.000361975	0.000503643	0.47	462933
genus.Flavonifractor.id.2059	rs12030302	1	77887835	0.00234163	25.356	A	G	-0.0692276	0.0137467	5.61e-07	10805	A	G	0.000116059	0.000292702	0.69	462933
genus.Flavonifractor.id.2059	rs12038887	1	102287083	0.00187121	19.8364	C	G	0.0942719	0.0211646	9.37e-06	10583	C	G	0.000550498	0.000446402	0.22	462933
genus.Flavonifractor.id.2059	rs34066017	11	44849689	0.00213261	22.8741	A	G	0.0764294	0.0159789	1.52e-06	10705	A	G	-2.78841e-05	0.000332312	0.93	462933
genus.Flavonifractor.id.2059	rs6761463	2	50201547	0.00188521	20.4043	G	C	-0.083392	0.0184596	8.11e-06	10805	G	C	0.000788679	0.000395112	0.0460002	462933
genus.Flavonifractor.id.2059	rs806808	10	32381186	0.00220573	23.8723	T	C	0.0667272	0.0136557	1.18e-06	10801	T	C	0.000479237	0.000291108	0.1	462933
genus.Fusicatenibacter.id.11305	rs10439674	21	42681392	0.00111301	19.3645	A	G	-0.0572129	0.0130007	7.68e-06	17381	A	G	0.000156938	0.000363009	0.67	462933
genus.Fusicatenibacter.id.11305	rs167879	20	55937366	0.00118685	19.6538	C	T	-0.0659543	0.0148763	5.87e-06	16542	C	T	-0.000224881	0.000384815	0.56	462933
genus.Fusicatenibacter.id.11305	rs1864685	17	70721782	0.00120433	20.9468	A	C	-0.0494799	0.0108105	4.96e-06	17374	A	C	0.000263759	0.000291845	0.37	462933
genus.Fusicatenibacter.id.11305	rs2025938	10	112177119	0.00141693	22.1695	G	A	-0.0967298	0.0205426	2.99e-06	15626	G	A	-0.000418446	0.000530463	0.43	462933
genus.Fusicatenibacter.id.11305	rs2039204	9	130371107	0.00122013	21.233	T	A	-0.0497414	0.0107941	3.94e-06	17383	T	A	0.00028021	0.000291413	0.34	462933
genus.Fusicatenibacter.id.11305	rs206581	18	10370596	0.00113467	19.7453	A	G	-0.0568339	0.0127894	8.96e-06	17384	A	G	3.27861e-05	0.00035017	0.93	462933
genus.Fusicatenibacter.id.11305	rs2132128	8	15360718	0.00133245	23.1729	G	A	-0.0771914	0.0160344	1.08e-06	17370	G	A	-0.000751872	0.000442174	0.089	462933
genus.Fusicatenibacter.id.11305	rs3303	10	120447429	0.00129232	21.8361	T	C	-0.0953657	0.020407	3.94e-06	16877	T	C	-0.000155398	0.000525387	0.77	462933
genus.Fusicatenibacter.id.11305	rs4378146	1	24927625	0.0013924	24.2364	A	C	-0.0616691	0.0125259	7.2e-07	17384	A	C	3.28979e-05	0.000335619	0.92	462933
genus.Fusicatenibacter.id.11305	rs60254196	7	148856720	0.00119268	20.2711	A	G	-0.0492427	0.0109365	5.47e-06	16978	A	G	-5.96377e-05	0.000292528	0.84	462933
genus.Fusicatenibacter.id.11305	rs62187631	2	226649570	0.00120372	19.9094	T	C	-0.0710571	0.015924	4.55e-06	16522	T	C	-0.000317249	0.000404454	0.43	462933
genus.Fusicatenibacter.id.11305	rs62353480	5	29595000	0.00143783	23.2069	A	G	-0.0701397	0.0145589	1.57e-06	16119	A	G	0.000644295	0.00038335	0.0929994	462933
genus.Fusicatenibacter.id.11305	rs6515626	20	25257001	0.00260813	20.3809	G	A	0.141575	0.0313559	7.29e-06	7796	G	A	0.000491745	0.000717713	0.49	462933
genus.Fusicatenibacter.id.11305	rs704418	3	64252803	0.00143764	23.9337	T	C	0.0739124	0.0151073	7.77e-07	16626	T	C	0.000213205	0.0004225	0.61	462933
genus.Fusicatenibacter.id.11305	rs73103914	12	58658311	0.00113398	19.7333	A	G	-0.0597324	0.0134458	8.3e-06	17384	A	G	0.000632073	0.000356263	0.0759994	462933
genus.Fusicatenibacter.id.11305	rs792108	2	5532793	0.00117302	19.9366	T	C	-0.0508345	0.0113843	8.5e-06	16978	T	C	0.000111788	0.000303431	0.709999	462933
genus.Fusicatenibacter.id.11305	rs8028026	15	88353215	0.0011643	19.2566	A	G	-0.0792146	0.0180505	8.06e-06	16522	A	G	0.000326802	0.000460048	0.48	462933
genus.Fusicatenibacter.id.11305	rs8063430	16	73821805	0.00140773	21.9211	T	C	-0.104026	0.022217	4.93e-06	15552	T	C	-0.000904754	0.000631512	0.15	462933
genus.Fusicatenibacter.id.11305	rs9905659	17	70697344	0.00116949	20.3518	G	A	-0.061617	0.0136576	7.31e-06	17384	G	A	-0.000143793	0.000381745	0.709999	462933
genus.Gordonibacter.id.821	rs117347059	7	129433205	0.00546295	20.2251	G	C	-0.128261	0.0285123	9.17e-06	3684	G	C	0.000565684	0.000359702	0.12	462933
genus.Gordonibacter.id.821	rs13412653	2	30158494	0.00540424	20.2184	A	C	0.107597	0.0239228	8.61e-06	3723	A	C	-0.000220013	0.000304732	0.47	462933
genus.Gordonibacter.id.821	rs16955299	17	52957210	0.00571387	20.5157	G	A	-0.196423	0.0433538	6.37e-06	3572	G	A	1.03157e-05	0.000556258	0.99	462933
genus.Gordonibacter.id.821	rs322296	7	136937189	0.0062031	22.4268	G	A	0.17869	0.037722	4.02e-06	3595	G	A	0.000366804	0.000452596	0.42	462933
genus.Gordonibacter.id.821	rs35042269	4	8142607	0.00552842	19.974	C	A	-0.180293	0.0403296	8.11e-06	3595	C	A	0.000839556	0.000534066	0.12	462933
genus.Gordonibacter.id.821	rs3765837	1	210628449	0.0054115	19.3371	T	G	-0.190729	0.0433608	7.17e-06	3556	T	G	-0.000223781	0.000503597	0.66	462933
genus.Gordonibacter.id.821	rs4596722	9	88787144	0.00527645	19.7378	A	G	0.102908	0.0231571	9.06e-06	3723	A	G	-9.34409e-05	0.000291739	0.75	462933
genus.Gordonibacter.id.821	rs61934597	12	131024079	0.00532087	19.6962	C	T	-0.172495	0.0388567	8.37e-06	3684	C	T	-4.48252e-05	0.00049478	0.93	462933
genus.Gordonibacter.id.821	rs71545975	7	47144505	0.00577059	20.6277	A	G	-0.153972	0.0338918	7.04e-06	3556	A	G	4.63969e-05	0.000418446	0.91	462933
genus.Gordonibacter.id.821	rs7220558	17	10148653	0.00661024	24.7604	A	T	0.116884	0.0234834	6.71e-07	3723	A	T	-0.000328201	0.000297254	0.27	462933
genus.Gordonibacter.id.821	rs72714787	4	136768501	0.00617727	23.1285	C	A	0.181405	0.0377102	1.43e-06	3723	C	A	-5.96363e-05	0.000486906	0.9	462933
genus.Gordonibacter.id.821	rs72939513	1	83136096	0.00550832	19.0148	A	G	-0.21399	0.0490592	7.98e-06	3435	A	G	5.98885e-05	0.000631845	0.92	462933
genus.Gordonibacter.id.821	rs7294633	12	29024534	0.00706786	26.4867	C	T	0.12867	0.0249946	3.44e-07	3723	C	T	-0.000268026	0.000320102	0.4	462933
genus.Gordonibacter.id.821	rs76287110	3	187450354	0.00773851	27.1478	A	T	-0.242965	0.0466177	1.67e-07	3483	A	T	0.000221785	0.000583602	0.7	462933
genus.Gordonibacter.id.821	rs768830	7	18970607	0.00539976	20.2016	G	A	0.149852	0.0333315	7.76e-06	3723	G	A	1.53162e-05	0.00043223	0.97	462933
genus.Haemophilus.id.3698	rs10781340	9	78752170	0.00240684	21.7983	G	A	0.0948915	0.0203221	4.32e-06	9037	G	A	-0.000360425	0.000387788	0.35	462933
genus.Haemophilus.id.3698	rs10840326	11	9951672	0.00224532	19.9968	C	G	-0.0677384	0.0151463	7.37e-06	8888	C	G	0.000312986	0.000293121	0.29	462933
genus.Haemophilus.id.3698	rs111582866	16	48742489	0.00271839	22.8095	G	A	-0.124265	0.026016	1.27e-06	8370	G	A	-0.000721381	0.000475243	0.13	462933
genus.Haemophilus.id.3698	rs12191680	6	129224488	0.00309383	28.2815	C	G	0.106544	0.0200323	1.47e-07	9115	C	G	0.000188075	0.000407367	0.64	462933
genus.Haemophilus.id.3698	rs12876183	13	85114550	0.0022015	20.0955	T	A	0.0749201	0.016711	9.62e-06	9110	T	A	0.000492849	0.000332536	0.14	462933
genus.Haemophilus.id.3698	rs35509	12	115493337	0.0026935	22.7622	G	A	0.128249	0.0268779	2.01e-06	8430	G	A	-0.000135772	0.000497972	0.79	462933
genus.Haemophilus.id.3698	rs4822728	22	26891808	0.00237835	21.7351	T	C	0.0705861	0.0151388	3.48e-06	9119	T	C	-0.000151589	0.000300114	0.61	462933
genus.Haemophilus.id.3698	rs56310940	7	24360361	0.00210652	19.2457	G	C	-0.108393	0.0247052	7.23e-06	9119	G	C	0.000147074	0.000551812	0.79	462933
genus.Haemophilus.id.3698	rs76022354	10	94306385	0.0064317	23.4076	C	T	0.244638	0.0505504	1.83e-06	3618	C	T	-0.000561323	0.000710264	0.43	462933
genus.Haemophilus.id.3698	rs78909003	9	105650242	0.00666516	23.867	T	C	-0.246256	0.0503924	1.67e-06	3559	T	C	-0.000867911	0.000654901	0.19	462933
genus.Haemophilus.id.3698	rs9328464	6	8350917	0.00258296	23.6098	T	C	0.0723095	0.0148799	1.42e-06	9119	T	C	0.000123423	0.00029004	0.67	462933
genus.Haemophilus.id.3698	rs9382510	6	55448491	0.00320808	29.3358	C	T	-0.093521	0.0172649	7.12e-08	9117	C	T	1.57096e-05	0.00034403	0.96	462933
genus.Haemophilus.id.3698	rs9574096	13	36104947	0.00246202	22.4992	A	T	-0.0736375	0.0155227	2.18e-06	9118	A	T	-0.000262062	0.000303315	0.39	462933
genus.Haemophilus.id.3698	rs9895850	17	64535013	0.00464659	21.4274	T	C	-0.192957	0.0416755	2.14e-06	4592	T	C	0.000683337	0.000662712	0.3	462933
genus.Holdemanella.id.11393	rs12415649	10	125021315	0.00252573	19.396	G	C	0.0839384	0.0190567	7.88e-06	7662	G	C	0.000797079	0.000340228	0.0189998	462933
genus.Holdemanella.id.11393	rs12513188	4	71000791	0.00277492	21.4208	G	A	0.0903906	0.0195276	4.65e-06	7700	G	A	-0.000372501	0.000368424	0.31	462933
genus.Holdemanella.id.11393	rs17586763	13	50932063	0.00517363	19.84	T	C	-0.227285	0.0510135	7.72e-06	3817	T	C	0.00041331	0.000718627	0.57	462933
genus.Holdemanella.id.11393	rs1830029	7	14728950	0.00273659	20.4545	C	G	-0.0954096	0.021093	5.35e-06	7456	C	G	-1.00411e-05	0.000377404	0.98	462933
genus.Holdemanella.id.11393	rs1926302	1	65153340	0.0028183	21.7622	G	A	-0.107972	0.0231421	7.5e-06	7702	G	A	0.000377962	0.000440509	0.39	462933
genus.Holdemanella.id.11393	rs34187114	8	138623633	0.0027676	21.3752	C	A	-0.104505	0.022601	5.13e-06	7704	C	A	8.30614e-05	0.00040101	0.84	462933
genus.Holdemanella.id.11393	rs35228298	3	85392882	0.00283938	21.225	G	A	0.0934832	0.0202886	7.3e-06	7456	G	A	0.000577507	0.000356159	0.1	462933
genus.Holdemanella.id.11393	rs4541991	9	105004835	0.00296195	22.7411	T	C	-0.0927334	0.0194435	2.1e-06	7657	T	C	-0.000349039	0.000355994	0.33	462933
genus.Holdemanella.id.11393	rs607782	6	4148609	0.00327754	24.5111	T	C	-0.0854214	0.0172515	7.19e-07	7456	T	C	0.000181798	0.000311314	0.56	462933
genus.Holdemanella.id.11393	rs62113381	19	7668225	0.00281736	20.6474	T	C	-0.105447	0.0232029	5.54e-06	7310	T	C	0.000130625	0.00040876	0.75	462933
genus.Holdemanella.id.11393	rs73011279	19	15020095	0.00311185	23.2681	T	C	-0.0961669	0.0199336	1.36e-06	7456	T	C	0.000637738	0.000352614	0.0710003	462933
genus.Holdemanella.id.11393	rs75764681	10	4494630	0.0073835	22.3227	T	C	-0.283103	0.0598999	1.94e-06	3003	T	C	-0.000962302	0.000717814	0.18	462933
genus.Holdemanella.id.11393	rs761624	6	163603171	0.00369502	28.572	C	G	0.0959801	0.0179537	1.38e-07	7706	C	G	-7.38597e-05	0.000328824	0.82	462933
genus.Holdemanella.id.11393	rs8113760	19	43851935	0.00277606	20.7504	G	A	0.078999	0.01734	4.62e-06	7456	G	A	3.38291e-05	0.000304504	0.91	462933
genus.Holdemania.id.2157	rs10885477	10	115332413	0.00230047	20.0325	T	C	-0.135137	0.0301894	8.6e-06	8690	T	C	-0.000357916	0.00059497	0.55	462933
genus.Holdemania.id.2157	rs11080063	17	26789271	0.00216068	19.7069	G	A	-0.0665238	0.0149837	6.67e-06	9103	G	A	-0.000179207	0.000290352	0.54	462933
genus.Holdemania.id.2157	rs111745969	15	93110222	0.00249779	20.6108	A	G	0.120677	0.0265781	3.71e-06	8233	A	G	-0.000439181	0.000492985	0.37	462933
genus.Holdemania.id.2157	rs113593397	8	123973840	0.00250417	20.8218	A	G	-0.128935	0.0282526	9.36e-06	8296	A	G	0.000152195	0.00052329	0.77	462933
genus.Holdemania.id.2157	rs116500994	13	81685543	0.00260006	21.9757	G	T	-0.13755	0.0293386	2.34e-06	8432	G	T	4.71824e-06	0.000566962	0.99	462933
genus.Holdemania.id.2157	rs12701617	7	38292857	0.00214183	19.541	A	G	-0.0660617	0.0149427	9.52e-06	9106	A	G	-0.000233197	0.000293763	0.43	462933
genus.Holdemania.id.2157	rs150096134	12	39589195	0.00343988	23.8309	T	A	0.162139	0.0332089	2.38e-06	6906	T	A	-0.000255373	0.000657348	0.7	462933
genus.Holdemania.id.2157	rs1867876	11	18768068	0.00295636	27.0034	T	C	0.0842919	0.0162192	2.74e-07	9109	T	C	0.000380471	0.000322837	0.24	462933
genus.Holdemania.id.2157	rs41438744	14	102553414	0.0024117	21.3637	C	G	-0.12487	0.027013	2.44e-06	8839	C	G	-0.000354145	0.000544493	0.52	462933
genus.Holdemania.id.2157	rs4146507	5	106209093	0.00220934	20.1628	C	T	0.079488	0.0177002	7.23e-06	9108	C	T	-0.000406049	0.000354865	0.25	462933
genus.Holdemania.id.2157	rs55888180	17	76443497	0.00243996	20.6974	C	G	0.128671	0.0282795	5.89e-06	8464	C	G	-0.000486049	0.000515414	0.35	462933
genus.Holdemania.id.2157	rs6133067	20	3839754	0.00292716	26.0137	T	C	0.0910829	0.0178561	5.17e-07	8863	T	C	0.000337901	0.000369815	0.36	462933
genus.Holdemania.id.2157	rs73139538	7	63323145	0.00253711	20.5851	G	A	-0.148594	0.0327469	7.77e-06	8095	G	A	-0.000114568	0.000602122	0.85	462933
genus.Holdemania.id.2157	rs77293403	5	77388406	0.00304698	23.1758	A	G	0.164556	0.0341775	1.77e-06	7585	A	G	-0.000352937	0.000602382	0.56	462933
genus.Holdemania.id.2157	rs80149660	10	129908282	0.00609673	20.1261	C	T	-0.232987	0.0519183	6.04e-06	3283	C	T	-7.8595e-05	0.000611118	0.9	462933
genus.Holdemania.id.2157	rs9500080	6	105737322	0.00293886	26.8343	C	T	0.0926764	0.0178886	4.09e-07	9106	C	T	0.00021248	0.000350191	0.54	462933
genus.Holdemania.id.2157	rs9529719	13	70856516	0.00233131	21.2762	T	C	0.074038	0.0160494	5.97e-06	9107	T	C	0.000211926	0.000318064	0.51	462933
genus.Holdemania.id.2157	rs967319	3	60615680	0.0021812	19.9054	T	C	0.0788638	0.0176744	8.38e-06	9108	T	C	4.27715e-05	0.000338288	0.9	462933
genus.Howardella.id.2000	rs10048062	15	98476920	0.00501988	19.1617	C	T	-0.147352	0.0336531	8.59e-06	3800	C	T	-0.0003665	0.00043685	0.4	462933
genus.Howardella.id.2000	rs12452946	17	17253288	0.00559213	21.3584	A	G	-0.105833	0.0228941	3.8e-06	3800	A	G	-0.000294087	0.000292663	0.31	462933
genus.Howardella.id.2000	rs1484873	18	43206985	0.00665642	24.1639	A	G	-0.227831	0.046335	2.56e-06	3608	A	G	-0.000303046	0.00064856	0.64	462933
genus.Howardella.id.2000	rs17167098	7	133154356	0.00641201	23.1289	G	A	-0.169366	0.0352068	1.12e-06	3586	G	A	-0.000118083	0.000417364	0.780001	462933
genus.Howardella.id.2000	rs2154047	14	95452797	0.00576564	20.9985	C	A	-0.192557	0.0420093	9.97e-06	3623	C	A	8.09358e-05	0.000527157	0.88	462933
genus.Howardella.id.2000	rs36081916	7	93527414	0.00624939	20.2119	T	C	-0.18123	0.0402987	4.7e-06	3216	T	C	0.000499234	0.000486895	0.31	462933
genus.Howardella.id.2000	rs3791893	2	218819396	0.00489727	18.6668	A	G	0.147035	0.034023	9.5e-06	3795	A	G	0.00035537	0.000450576	0.43	462933
genus.Howardella.id.2000	rs609430	4	169178315	0.00573782	21.9065	T	G	-0.112045	0.0239328	3.34e-06	3798	T	G	0.000334745	0.000308288	0.28	462933
genus.Howardella.id.2000	rs61771805	1	72972799	0.00584498	21.2244	A	T	-0.136779	0.0296811	4.03e-06	3612	A	T	-0.000275776	0.000355568	0.44	462933
genus.Howardella.id.2000	rs672217	18	60125134	0.00605447	21.9837	G	A	0.164146	0.0349993	3.52e-06	3611	G	A	-0.000871663	0.000433531	0.0439997	462933
genus.Howardella.id.2000	rs901099	11	77901287	0.0069947	25.6753	T	G	-0.12718	0.0250924	6.53e-07	3647	T	G	-0.000206481	0.000317981	0.52	462933
genus.Hungatella.id.11306	rs10044993	5	58424440	0.00459025	19.4002	C	A	0.139547	0.0316748	8.07e-06	4209	C	A	0.000244106	0.000414895	0.56	462933
genus.Hungatella.id.11306	rs13128780	4	166058998	0.00569753	22.9035	T	C	-0.149725	0.0312777	1.75e-06	3999	T	C	-0.000920247	0.000415518	0.0269998	462933
genus.Hungatella.id.11306	rs13249325	8	14853525	0.00463693	19.5984	T	G	-0.100023	0.0225883	9.69e-06	4209	T	G	0.000139802	0.000300762	0.64	462933
genus.Hungatella.id.11306	rs17092615	14	95973619	0.00503854	20.2917	G	A	0.152235	0.0337867	7.38e-06	4009	G	A	-0.000692965	0.000434431	0.11	462933
genus.Hungatella.id.11306	rs72759041	15	89577376	0.00507322	19.9272	G	T	-0.126025	0.0282242	3.86e-06	3910	G	T	-0.000225651	0.0003419	0.51	462933
genus.Intestinibacter.id.11345	rs10805326	4	14326193	0.00249748	30.7984	G	A	0.0775151	0.0139665	3.55e-08	12303	G	A	0.000251507	0.000322297	0.44	462933
genus.Intestinibacter.id.11345	rs11109097	12	97928437	0.0017054	20.3016	C	T	0.0624272	0.0138539	5.49e-06	11886	C	T	-0.000516888	0.000317672	0.1	462933
genus.Intestinibacter.id.11345	rs118030283	16	5993076	0.00247355	21.8907	G	A	-0.151829	0.0324471	2.67e-06	8830	G	A	0.00108589	0.000641751	0.0909997	462933
genus.Intestinibacter.id.11345	rs16938435	9	21502923	0.00184217	22.7023	T	C	-0.112189	0.0235439	1.8e-06	12303	T	C	-0.000655955	0.000553717	0.24	462933
genus.Intestinibacter.id.11345	rs2098844	11	127703160	0.00163023	20.0667	C	T	-0.0575295	0.0128416	6.79e-06	12291	C	T	-0.000106342	0.000293533	0.719999	462933
genus.Intestinibacter.id.11345	rs2702387	4	179361262	0.00172252	21.2046	A	G	0.0608559	0.0132145	4.26e-06	12291	A	G	-0.000375486	0.000308608	0.22	462933
genus.Intestinibacter.id.11345	rs4327025	15	92446683	0.002234	27.5419	G	A	-0.0810346	0.0154397	1.64e-07	12303	G	A	-0.000318101	0.000354604	0.37	462933
genus.Intestinibacter.id.11345	rs447950	5	148846426	0.00171554	21.1391	A	G	0.0628342	0.0136652	5.64e-06	12303	A	G	0.000267703	0.000315912	0.4	462933
genus.Intestinibacter.id.11345	rs478972	11	125663184	0.00222682	23.0566	T	C	-0.142681	0.0297116	1.82e-06	10333	T	C	-8.94977e-05	0.000671346	0.89	462933
genus.Intestinibacter.id.11345	rs6062862	20	61325223	0.00167136	20.4029	A	G	0.0924508	0.0204658	6.68e-06	12189	A	G	0.000191379	0.000451321	0.67	462933
genus.Intestinibacter.id.11345	rs62430350	6	170918194	0.00240992	18.4756	T	C	0.151096	0.0351476	6.84e-06	7650	T	C	-0.000918315	0.000657007	0.16	462933
genus.Intestinibacter.id.11345	rs68093214	3	70657785	0.00163996	19.5213	C	T	0.0662258	0.0149877	9.26e-06	11886	C	T	-0.000383282	0.000337051	0.26	462933
genus.Intestinibacter.id.11345	rs6875660	5	159686256	0.00171255	21.0851	C	T	0.0890455	0.0193905	3.06e-06	12293	C	T	0.00039829	0.000461149	0.39	462933
genus.Intestinibacter.id.11345	rs893394	2	20054971	0.00167227	19.9066	G	A	0.0583322	0.0130729	7.85e-06	11886	G	A	0.000302779	0.000296888	0.31	462933
genus.Intestinibacter.id.11345	rs9348442	6	10303945	0.00162194	19.9839	C	T	0.099082	0.0221625	6.26e-06	12303	C	T	-0.000579242	0.000547156	0.29	462933
genus.Intestinimonas.id.2062	rs1000888	13	23343542	0.00161749	19.5838	C	G	-0.0585038	0.013219	9.71e-06	12090	C	G	0.000505307	0.000298816	0.0909997	462933
genus.Intestinimonas.id.2062	rs10262702	7	66890843	0.00188234	22.1857	T	C	0.0918017	0.0194885	2.06e-06	11766	T	C	-0.00026365	0.000442217	0.55	462933
genus.Intestinimonas.id.2062	rs11258178	10	13124513	0.00205793	24.2595	A	G	0.0660742	0.0134139	6.98e-07	11766	A	G	0.000637748	0.000301487	0.0340001	462933
genus.Intestinimonas.id.2062	rs12226153	11	94364293	0.0026804	24.2449	A	G	-0.151142	0.0306922	5.12e-07	9023	A	G	0.000432946	0.000618988	0.48	462933
genus.Intestinimonas.id.2062	rs12566247	1	43767569	0.00183115	22.1498	T	A	0.0637084	0.0135355	2.19e-06	12076	T	A	-0.000500131	0.000308542	0.11	462933
genus.Intestinimonas.id.2062	rs17067892	8	3763540	0.00158988	18.3797	C	T	0.107194	0.0250013	6.38e-06	11544	C	T	-0.000416788	0.000563778	0.46	462933
genus.Intestinimonas.id.2062	rs1859797	7	22007303	0.00178004	20.9777	G	A	0.060368	0.0131793	4.12e-06	11766	G	A	-0.000171128	0.000293313	0.56	462933
genus.Intestinimonas.id.2062	rs2276760	3	150620956	0.00166744	20.1746	A	G	-0.0685233	0.0152546	7.84e-06	12081	A	G	-0.000418941	0.000354489	0.24	462933
genus.Intestinimonas.id.2062	rs2731794	5	17209391	0.00197657	21.9379	C	T	0.120632	0.0257529	1.92e-06	11079	C	T	0.00054816	0.000581766	0.35	462933
genus.Intestinimonas.id.2062	rs2930225	16	85327902	0.00189181	22.7466	G	T	0.0729524	0.0152948	1.35e-06	12003	G	T	0.000613549	0.000327749	0.061	462933
genus.Intestinimonas.id.2062	rs4113676	20	6218922	0.00623011	19.8607	A	C	-0.218507	0.0490152	7.42e-06	3170	A	C	-3.15305e-05	0.000683254	0.96	462933
genus.Intestinimonas.id.2062	rs4784055	16	58818770	0.00641998	20.6185	T	C	-0.175324	0.038599	8.72e-07	3193	T	C	0.000303202	0.000725942	0.68	462933
genus.Intestinimonas.id.2062	rs62240188	3	10611142	0.00230655	23.6968	G	A	0.130074	0.0267179	2.2e-06	10252	G	A	0.000335955	0.000541608	0.54	462933
genus.Intestinimonas.id.2062	rs62427239	6	155737906	0.00305632	19.5683	C	A	0.162658	0.0367647	9.41e-06	6385	C	A	0.000888863	0.000665471	0.18	462933
genus.Intestinimonas.id.2062	rs6934519	6	67200802	0.00173261	20.9784	C	T	0.0692373	0.0151154	8.57e-06	12089	C	T	0.000225492	0.000333202	0.5	462933
genus.Intestinimonas.id.2062	rs716604	2	6514088	0.00200496	24.2846	A	G	0.0818068	0.0165992	8.57e-07	12090	A	G	1.6933e-05	0.000379217	0.96	462933
genus.Intestinimonas.id.2062	rs7170984	15	93819735	0.00180464	21.8539	T	C	-0.0658116	0.0140767	2.98e-06	12090	T	C	-0.0006987	0.000320671	0.0290001	462933
genus.Intestinimonas.id.2062	rs72982915	2	140898088	0.00368555	20.6748	C	T	0.183158	0.0402743	4.91e-06	5591	C	T	-0.000371824	0.000696177	0.59	462933
genus.Intestinimonas.id.2062	rs9823439	3	17187502	0.00166289	19.5948	T	C	-0.0581947	0.0131455	9.86e-06	11766	T	C	0.000100275	0.00029435	0.73	462933
genus.Intestinimonas.id.2062	rs994794	4	114608814	0.00218815	20.2804	G	C	-0.141905	0.0315074	7.31e-06	9250	G	C	-0.0012457	0.000673521	0.064	462933
genus.Lachnoclostridium.id.11308	rs1031599	3	66725825	0.00115047	20.0367	G	T	-0.078627	0.0175644	6.31e-06	17398	G	T	-4.10426e-05	0.000527127	0.94	462933
genus.Lachnoclostridium.id.11308	rs12566975	1	185091351	0.00109137	19.5776	T	C	-0.0468097	0.0105787	9.57e-06	17921	T	C	0.000172163	0.000291335	0.55	462933
genus.Lachnoclostridium.id.11308	rs1528479	2	167244051	0.00113068	19.781	G	A	-0.0497798	0.0111919	9.64e-06	17477	G	A	0.000431771	0.000310439	0.16	462933
genus.Lachnoclostridium.id.11308	rs1997204	12	102046595	0.00140844	19.9378	T	C	-0.108075	0.0242022	5.97e-06	14138	T	C	-0.000153103	0.000634066	0.81	462933
genus.Lachnoclostridium.id.11308	rs2385421	18	19743455	0.000951206	17.0438	A	G	0.0746186	0.0180734	7.14e-06	17903	A	G	-0.00047607	0.000554415	0.39	462933
genus.Lachnoclostridium.id.11308	rs3821998	4	38694566	0.00112284	20.1417	C	A	-0.0864066	0.0192519	6.72e-06	17920	C	A	-0.000337774	0.000533127	0.53	462933
genus.Lachnoclostridium.id.11308	rs4738679	8	59370320	0.00116003	20.8106	G	A	-0.0520267	0.011404	4.42e-06	17921	G	A	0.000792896	0.000309154	0.01	462933
genus.Lachnoclostridium.id.11308	rs6112314	20	19300846	0.00150899	26.961	A	C	-0.0561715	0.0108174	2.43e-07	17842	A	C	1.80115e-05	0.000298081	0.95	462933
genus.Lachnoclostridium.id.11308	rs615997	3	23037786	0.00128771	23.0913	T	C	0.0511752	0.0106491	2.03e-06	17911	T	C	1.57299e-05	0.0002924	0.96	462933
genus.Lachnoclostridium.id.11308	rs61915992	12	28169306	0.00129746	21.7879	A	T	0.0803876	0.0172209	2.67e-06	16773	A	T	-0.000372701	0.000439248	0.4	462933
genus.Lachnoclostridium.id.11308	rs62028349	16	27217620	0.00109633	19.6677	G	C	0.0469989	0.0105971	9.17e-06	17922	G	C	0.000129632	0.000295132	0.66	462933
genus.Lachnoclostridium.id.11308	rs62285313	3	177470032	0.00133158	22.6524	A	G	0.0864203	0.0181565	1.58e-06	16991	A	G	0.000443301	0.000475553	0.35	462933
genus.Lachnoclostridium.id.11308	rs72829893	17	46694541	0.00154538	19.1954	G	T	0.117472	0.0268103	5.58e-06	12404	G	T	0.0014249	0.000665947	0.032	462933
genus.Lachnoclostridium.id.11308	rs78068103	17	13816159	0.0011895	20.8113	A	G	0.0886199	0.0194248	3.67e-06	17477	A	G	-0.000415335	0.000573622	0.47	462933
genus.Lachnoclostridium.id.11308	rs789029	18	1053252	0.00120393	21.6005	C	T	-0.0641289	0.0137974	3.75e-06	17922	C	T	0.000215004	0.000387599	0.58	462933
genus.Lachnospira.id.2004	rs13157098	5	176802250	0.00153121	24.4525	A	G	-0.0768058	0.0155312	5.99e-07	15947	A	G	0.000513238	0.000408402	0.21	462933
genus.Lachnospira.id.2004	rs159484	4	111995627	0.00122112	20.1548	G	A	0.0794668	0.0176999	6.68e-06	16487	G	A	0.000402739	0.000498197	0.42	462933
genus.Lachnospira.id.2004	rs2326833	6	6893668	0.00134473	21.0464	C	G	-0.078495	0.017109	4.6e-06	15632	C	G	-4.46795e-05	0.000446119	0.92	462933
genus.Lachnospira.id.2004	rs2520509	12	91006514	0.00121664	20.0966	A	G	0.0519063	0.011578	7.42e-06	16500	A	G	-0.00048137	0.000311135	0.12	462933
genus.Lachnospira.id.2004	rs4686798	3	186445436	0.00132335	21.8576	T	C	0.0531826	0.0113747	2.74e-06	16497	T	C	0.000392976	0.000301204	0.19	462933
genus.Lachnospira.id.2004	rs4923324	11	25962890	0.00129722	21.4163	G	A	-0.0617321	0.0133387	2.44e-06	16490	G	A	-0.000119854	0.00034117	0.73	462933
genus.Lachnospira.id.2004	rs56791201	2	57701660	0.00132765	21.9141	T	C	0.051823	0.0110697	2.93e-06	16486	T	C	-2.04144e-05	0.000291229	0.94	462933
genus.LachnospiraceaeFCS020group.id.11314	rs10093861	8	121244406	0.00159835	22.0445	G	A	-0.0568869	0.0121152	3.06e-06	13772	G	A	-0.000948254	0.000290688	0.00109999	462933
genus.LachnospiraceaeFCS020group.id.11314	rs113859143	5	109403564	0.00152684	20.2401	G	C	-0.108906	0.0242055	2.55e-06	13238	G	C	-0.000593967	0.000567417	0.3	462933
genus.LachnospiraceaeFCS020group.id.11314	rs12078956	1	35328576	0.00172642	22.6535	C	G	0.106101	0.0222904	2.15e-06	13101	C	G	-0.000334161	0.000507331	0.51	462933
genus.LachnospiraceaeFCS020group.id.11314	rs1254846	10	44346094	0.00157441	20.7677	G	A	0.105963	0.0232501	5.6e-06	13172	G	A	0.000299369	0.000564734	0.6	462933
genus.LachnospiraceaeFCS020group.id.11314	rs1363769	19	17865305	0.00557577	19.9218	T	C	-0.200628	0.0449372	1.58e-06	3555	T	C	0.00106024	0.000657344	0.11	462933
genus.LachnospiraceaeFCS020group.id.11314	rs2322265	4	166588085	0.00160572	22.1463	C	T	-0.0666305	0.0141577	5.21e-06	13772	C	T	-0.000108056	0.00034223	0.75	462933
genus.LachnospiraceaeFCS020group.id.11314	rs2862811	3	165996415	0.00156125	21.532	T	C	0.0564927	0.0121736	3.92e-06	13772	T	C	0.000453123	0.000292632	0.12	462933
genus.LachnospiraceaeFCS020group.id.11314	rs35035870	11	3248876	0.00373604	21.1503	T	C	-0.190615	0.0414403	2.62e-06	5642	T	C	-0.000110426	0.000698342	0.87	462933
genus.LachnospiraceaeFCS020group.id.11314	rs369444	16	23631307	0.00187942	23.4673	C	G	0.125481	0.0259008	3.15e-06	12465	C	G	-0.000850616	0.000633568	0.18	462933
genus.LachnospiraceaeFCS020group.id.11314	rs3999074	10	65563647	0.00148041	20.4155	G	T	-0.0550587	0.0121847	6.55e-06	13772	G	T	-4.82258e-05	0.000295084	0.87	462933
genus.LachnospiraceaeFCS020group.id.11314	rs4452603	6	71966268	0.00146208	19.745	T	G	0.0604208	0.0135965	8.98e-06	13487	T	G	-8.42387e-06	0.000329577	0.98	462933
genus.LachnospiraceaeFCS020group.id.11314	rs7249113	19	2571232	0.00191058	25.9034	G	A	0.0679483	0.0133496	3.72e-07	13534	G	A	5.04097e-05	0.000322582	0.88	462933
genus.LachnospiraceaeFCS020group.id.11314	rs72793667	2	53946431	0.00180913	22.463	A	G	-0.116881	0.0246589	1.63e-06	12396	A	G	-0.000638518	0.000537141	0.23	462933
genus.LachnospiraceaeFCS020group.id.11314	rs9308097	4	165786478	0.00147891	20.0541	A	G	0.055381	0.0123659	7.47e-06	13542	A	G	-0.00054343	0.000296571	0.0669993	462933
genus.LachnospiraceaeFCS020group.id.11314	rs9788306	13	40419314	0.00167265	23.071	C	T	-0.062804	0.0130744	1.39e-06	13772	C	T	0.00011059	0.00031891	0.73	462933
genus.LachnospiraceaeFCS020group.id.11314	rs9919338	1	118425334	0.00152616	21.0413	G	C	-0.0553339	0.0120621	4.91e-06	13768	G	C	-0.000134933	0.000291448	0.64	462933
genus.LachnospiraceaeNC2004group.id.11316	rs117467633	17	21157406	0.00384803	19.6042	T	C	-0.169687	0.0383169	9.13e-06	5077	T	C	-0.00028793	0.00058161	0.62	462933
genus.LachnospiraceaeNC2004group.id.11316	rs12127733	1	234157721	0.00350863	21.9146	G	A	0.115182	0.0246006	3.11e-06	6226	G	A	-0.000118489	0.000383236	0.760001	462933
genus.LachnospiraceaeNC2004group.id.11316	rs12208226	6	22725908	0.00366405	20.6603	C	A	-0.154739	0.0340372	9.75e-06	5620	C	A	3.15561e-05	0.000531972	0.95	462933
genus.LachnospiraceaeNC2004group.id.11316	rs12863463	13	47512191	0.00370229	20.4903	G	A	-0.156365	0.0345372	6.04e-06	5516	G	A	-0.000156399	0.000556289	0.780001	462933
genus.LachnospiraceaeNC2004group.id.11316	rs1331592	9	122239986	0.0032659	20.7278	C	G	0.0948806	0.0208369	5.34e-06	6328	C	G	6.05398e-05	0.000348583	0.86	462933
genus.LachnospiraceaeNC2004group.id.11316	rs17067076	18	58229086	0.00431412	19.268	G	A	-0.154631	0.0352194	5.61e-06	4449	G	A	0.000643479	0.000645584	0.32	462933
genus.LachnospiraceaeNC2004group.id.11316	rs1928659	9	29334137	0.00370231	20.4904	T	C	0.102522	0.0226445	6.17e-06	5516	T	C	0.000148755	0.000340349	0.66	462933
genus.LachnospiraceaeNC2004group.id.11316	rs1929743	13	76829562	0.00304771	19.3449	T	C	0.0837206	0.0190318	9.06e-06	6330	T	C	-0.000195277	0.000306586	0.52	462933
genus.LachnospiraceaeNC2004group.id.11316	rs3756315	5	149544722	0.00346308	21.9836	A	G	-0.0883469	0.0188397	3.33e-06	6328	A	G	-0.000303992	0.000311632	0.33	462933
genus.LachnospiraceaeNC2004group.id.11316	rs6116753	20	5330700	0.00359064	22.616	G	A	0.0994748	0.0209139	2.92e-06	6278	G	A	-0.000201298	0.000333234	0.55	462933
genus.LachnospiraceaeND3007group.id.11317	rs13110238	4	7678735	0.0013372	20.1077	C	G	-0.0636978	0.0142041	4.48e-06	15019	C	G	0.000246913	0.000353777	0.49	462933
genus.LachnospiraceaeND3007group.id.11317	rs2861203	3	172950553	0.00131927	20.2155	G	A	0.0572304	0.0127279	7.37e-06	15305	G	A	0.000557812	0.000325488	0.0870001	462933
genus.LachnospiraceaeND3007group.id.11317	rs72776675	10	14137663	0.00124813	19.1203	T	C	-0.0647067	0.014797	8.72e-06	15302	T	C	-0.000843245	0.000383223	0.0280001	462933
genus.LachnospiraceaeND3007group.id.11317	rs9932954	16	1100633	0.0015393	23.4643	A	G	-0.0561864	0.0115984	1.25e-06	15222	A	G	-0.00018851	0.00029302	0.52	462933
genus.LachnospiraceaeNK4A136group.id.11319	rs10952110	7	8497922	0.00117949	19.794	G	T	0.0487709	0.0109614	9.08e-06	16764	G	T	-0.000208273	0.00029373	0.48	462933
genus.LachnospiraceaeNK4A136group.id.11319	rs11263806	17	35240097	0.00116994	20.1864	A	G	-0.0524615	0.0116758	5.07e-06	17236	A	G	8.28916e-05	0.000316993	0.79	462933
genus.LachnospiraceaeNK4A136group.id.11319	rs12362320	11	3922055	0.0014677	24.6378	G	C	0.0573168	0.0115466	8.04e-07	16764	G	C	-0.000168276	0.000304929	0.58	462933
genus.LachnospiraceaeNK4A136group.id.11319	rs12611395	19	21806125	0.00123801	20.4326	A	G	-0.0902532	0.0199652	5.83e-06	16486	A	G	0.000358716	0.000498407	0.47	462933
genus.LachnospiraceaeNK4A136group.id.11319	rs160061	5	6116659	0.00130943	22.5936	A	G	0.0513831	0.0108094	2.12e-06	17234	A	G	0.000333137	0.000291645	0.25	462933
genus.LachnospiraceaeNK4A136group.id.11319	rs28540839	8	84735080	0.00125849	21.1214	A	C	0.0508285	0.0110591	9.34e-06	16764	A	C	0.000134419	0.000291261	0.64	462933
genus.LachnospiraceaeNK4A136group.id.11319	rs2880566	17	30016653	0.0011486	19.8132	T	C	0.0599578	0.0134693	5.61e-06	17232	T	C	1.06901e-05	0.000366401	0.98	462933
genus.LachnospiraceaeNK4A136group.id.11319	rs4955932	3	55181375	0.00117367	20.2508	T	C	-0.0492283	0.0109388	7.05e-06	17236	T	C	0.00010272	0.000302594	0.73	462933
genus.LachnospiraceaeNK4A136group.id.11319	rs59805249	5	90289997	0.00133159	20.2578	T	C	0.0936162	0.0207982	9.45e-06	15195	T	C	0.000162231	0.000618313	0.79	462933
genus.LachnospiraceaeNK4A136group.id.11319	rs68104925	14	100177681	0.00131289	22.6443	T	C	-0.0549104	0.0115385	2.37e-06	17227	T	C	0.000508551	0.000304113	0.0940005	462933
genus.LachnospiraceaeNK4A136group.id.11319	rs7073658	10	62175024	0.00120217	20.7432	T	G	-0.0499621	0.0109693	5.27e-06	17236	T	G	-7.01119e-05	0.00029889	0.81	462933
genus.LachnospiraceaeNK4A136group.id.11319	rs73044693	19	51256120	0.00171162	21.8965	A	G	-0.10758	0.0229884	3.57e-06	12773	A	G	0.000140865	0.00053666	0.79	462933
genus.LachnospiraceaeNK4A136group.id.11319	rs7616165	3	190415145	0.00552354	22.7279	G	T	-0.230542	0.0483465	2.77e-06	4094	G	T	-0.000188983	0.000679661	0.780001	462933
genus.LachnospiraceaeNK4A136group.id.11319	rs76193507	3	161749981	0.00587068	21.1175	A	G	-0.22973	0.0499776	2.93e-06	3578	A	G	-0.000450983	0.000697996	0.52	462933
genus.LachnospiraceaeNK4A136group.id.11319	rs7832116	8	4842929	0.00128754	22.1961	A	G	-0.0714756	0.0151703	3.57e-06	17219	A	G	0.00107942	0.000415393	0.00940005	462933
genus.LachnospiraceaeNK4A136group.id.11319	rs954878	1	54578401	0.00132072	22.7795	A	G	-0.0520656	0.0109082	1.78e-06	17227	A	G	-1.02314e-05	0.000294058	0.97	462933
genus.LachnospiraceaeUCG004.id.11324	rs11128180	3	70592215	0.00147743	21.4011	A	G	0.0648288	0.0140126	4.52e-06	14466	A	G	0.000240916	0.000342614	0.48	462933
genus.LachnospiraceaeUCG004.id.11324	rs12072562	1	105287469	0.0020908	19.2212	T	C	0.133104	0.0303566	7.07e-06	9176	T	C	1.50997e-05	0.000623621	0.98	462933
genus.LachnospiraceaeUCG004.id.11324	rs12673420	7	71303007	0.00151402	21.9274	G	A	0.0554351	0.0118375	2.98e-06	14463	G	A	0.000371147	0.000294895	0.21	462933
genus.LachnospiraceaeUCG004.id.11324	rs12747809	1	240359089	0.00169025	24.4858	G	A	-0.062197	0.0125685	8.65e-07	14464	G	A	-0.000298816	0.000312879	0.34	462933
genus.LachnospiraceaeUCG004.id.11324	rs12894272	14	40536481	0.0014799	21.4326	A	G	0.0579792	0.0125229	4.34e-06	14463	A	G	0.000106478	0.000310443	0.73	462933
genus.LachnospiraceaeUCG004.id.11324	rs233486	6	14817584	0.00147344	20.2277	A	G	-0.0799088	0.017766	6.28e-06	13710	A	G	0.000498006	0.000427586	0.24	462933
genus.LachnospiraceaeUCG004.id.11324	rs2444793	6	81318836	0.00145432	21.0615	C	T	-0.0542433	0.0118188	4.77e-06	14463	C	T	-9.52527e-05	0.000292625	0.74	462933
genus.LachnospiraceaeUCG004.id.11324	rs2706242	13	51292902	0.00145031	20.3687	G	C	-0.0901399	0.0199712	9.84e-06	14026	G	C	2.31168e-07	0.000499249	1	462933
genus.LachnospiraceaeUCG004.id.11324	rs2726805	4	183247601	0.00142158	20.591	A	G	0.0548397	0.0120844	6.3e-06	14466	A	G	-9.44551e-05	0.000298496	0.75	462933
genus.LachnospiraceaeUCG004.id.11324	rs2882478	2	49904589	0.00164125	23.7781	G	A	-0.0577091	0.0118338	1.21e-06	14466	G	A	0.000603083	0.000294682	0.0409996	462933
genus.LachnospiraceaeUCG004.id.11324	rs35182105	12	24572337	0.00155582	20.519	A	G	-0.109724	0.024221	4.87e-06	13170	A	G	0.000109905	0.000569134	0.85	462933
genus.LachnospiraceaeUCG004.id.11324	rs6656451	1	65990422	0.00142992	20.7005	C	T	-0.05436	0.011947	5.57e-06	14458	C	T	0.000180727	0.000292356	0.54	462933
genus.LachnospiraceaeUCG004.id.11324	rs7629954	3	154242406	0.00164566	20.7134	A	G	0.108441	0.023825	5.77e-06	12568	A	G	-6.35433e-05	0.000562875	0.91	462933
genus.LachnospiraceaeUCG008.id.11328	rs10741777	11	19572557	0.00355081	24.987	T	C	-0.0973842	0.0194791	7.69e-07	7014	T	C	-0.000311101	0.000342077	0.36	462933
genus.LachnospiraceaeUCG008.id.11328	rs10793103	11	74391775	0.00410183	28.8805	C	T	0.0974344	0.0181279	9.35e-08	7014	C	T	-0.000357651	0.000314917	0.26	462933
genus.LachnospiraceaeUCG008.id.11328	rs10801803	1	90818872	0.00329222	23.1712	G	A	-0.117029	0.0243085	1.4e-06	7017	G	A	-0.000348364	0.00043133	0.42	462933
genus.LachnospiraceaeUCG008.id.11328	rs13024781	2	168628871	0.00317973	22.3738	T	C	-0.0798769	0.0168846	2.29e-06	7016	T	C	0.000372546	0.000293448	0.2	462933
genus.LachnospiraceaeUCG008.id.11328	rs57091572	6	81214803	0.0031465	21.9309	A	G	-0.110443	0.0235801	2.86e-06	6950	A	G	0.000133207	0.000403404	0.74	462933
genus.LachnospiraceaeUCG008.id.11328	rs57254474	8	23071054	0.00281896	19.8309	G	A	0.0886511	0.0199045	6.92e-06	7017	G	A	-0.000355441	0.000340668	0.3	462933
genus.LachnospiraceaeUCG008.id.11328	rs61944774	12	129539818	0.00346385	20.8484	A	G	0.179838	0.0393797	6.34e-06	6000	A	G	0.000364814	0.000615893	0.55	462933
genus.LachnospiraceaeUCG008.id.11328	rs62277846	2	228100140	0.00329751	23.2052	C	T	0.102292	0.0212319	1.59e-06	7016	C	T	-0.000328931	0.000363621	0.37	462933
genus.LachnospiraceaeUCG008.id.11328	rs67078837	4	114220647	0.00348777	24.5489	T	C	-0.0845848	0.0170693	7.68e-07	7016	T	C	7.6232e-05	0.000292823	0.79	462933
genus.LachnospiraceaeUCG008.id.11328	rs75356640	15	31697284	0.00314814	20.2781	G	A	0.136523	0.0303128	9.83e-06	6423	G	A	7.88281e-05	0.00052925	0.88	462933
genus.LachnospiraceaeUCG008.id.11328	rs955844	16	84992314	0.00349641	24.0731	A	C	0.112064	0.0228369	1.81e-06	6863	A	C	0.000426184	0.000394962	0.28	462933
genus.LachnospiraceaeUCG008.id.11328	rs9873555	3	100496680	0.00407827	26.9245	G	C	-0.121162	0.0233467	2.41e-07	6577	G	C	7.53552e-05	0.000391689	0.85	462933
genus.LachnospiraceaeUCG010.id.11330	rs10414815	19	42586245	0.00177905	20.606	T	C	0.10453	0.0230253	4.24e-06	11564	T	C	1.8082e-05	0.000461691	0.97	462933
genus.LachnospiraceaeUCG010.id.11330	rs11192447	10	83848397	0.00212538	27.0349	A	G	0.126592	0.024345	4.69e-07	12695	A	G	-0.000489509	0.000604939	0.42	462933
genus.LachnospiraceaeUCG010.id.11330	rs12346653	9	92267239	0.00172963	22.2019	C	T	0.0657686	0.0139569	2.7e-06	12816	C	T	0.000657859	0.000338997	0.0519996	462933
genus.LachnospiraceaeUCG010.id.11330	rs17730011	6	84772845	0.00150973	19.9949	G	A	-0.0702357	0.015706	7.85e-06	13226	G	A	0.000325748	0.000381124	0.39	462933
genus.LachnospiraceaeUCG010.id.11330	rs2153460	9	85576178	0.00144015	19.0864	A	T	-0.0684038	0.0156562	9.17e-06	13236	A	T	0.000102329	0.00037198	0.780001	462933
genus.LachnospiraceaeUCG010.id.11330	rs2833528	21	33193567	0.00146082	19.3564	C	T	-0.0562148	0.0127763	9.92e-06	13233	C	T	-6.19502e-05	0.000302428	0.84	462933
genus.LachnospiraceaeUCG010.id.11330	rs336138	5	8146371	0.00155193	20.5701	G	T	0.0779543	0.0171865	7.48e-06	13236	G	T	-0.000309169	0.000394389	0.43	462933
genus.LachnospiraceaeUCG010.id.11330	rs4576377	7	81410263	0.00153049	20.2687	A	C	-0.0572001	0.0127043	7.63e-06	13225	A	C	-0.000491984	0.000299265	0.1	462933
genus.LachnospiraceaeUCG010.id.11330	rs72761829	1	224897491	0.0019057	21.9306	A	T	0.111884	0.0238893	2.58e-06	11488	A	T	-0.000145273	0.000554464	0.79	462933
genus.LachnospiraceaeUCG010.id.11330	rs72894957	2	185862591	0.00481421	20.869	G	A	0.222263	0.0486425	5.68e-06	4316	G	A	-0.000960392	0.000693255	0.17	462933
genus.LachnospiraceaeUCG010.id.11330	rs74315802	14	29872341	0.00175412	22.3393	G	T	0.0867262	0.0183477	3.19e-06	12715	G	T	-9.61738e-05	0.000438111	0.83	462933
genus.LachnospiraceaeUCG010.id.11330	rs9981767	21	44079875	0.00191809	24.6256	A	C	0.0655062	0.0131994	9.96e-07	12816	A	C	2.24946e-05	0.000313372	0.94	462933
genus.Lactobacillus.id.1837	rs11674854	2	28903275	0.00349464	23.3314	C	T	-0.0852686	0.0176504	1.59e-06	6655	C	T	-0.000379258	0.000300301	0.21	462933
genus.Lactobacillus.id.1837	rs12693845	2	199312684	0.00295296	20.6016	C	T	-0.0805447	0.0177429	8.96e-06	6958	C	T	-0.000427979	0.000298125	0.15	462933
genus.Lactobacillus.id.1837	rs1530559	2	135755629	0.00304921	20.3484	G	A	0.0804001	0.0178207	4.93e-06	6655	G	A	-0.000331616	0.000294527	0.26	462933
genus.Lactobacillus.id.1837	rs16861661	1	18501459	0.00430983	23.0405	G	A	-0.183147	0.038148	1.28e-06	5325	G	A	0.000147706	0.000569427	0.8	462933
genus.Lactobacillus.id.1837	rs328312	16	73890910	0.00331854	23.134	T	A	0.0815092	0.0169441	1.41e-06	6950	T	A	6.23778e-06	0.000292923	0.98	462933
genus.Lactobacillus.id.1837	rs6092149	20	54192992	0.00315185	21.8292	A	T	-0.0801344	0.017149	3.29e-06	6906	A	T	8.44862e-05	0.000294552	0.77	462933
genus.Lactobacillus.id.1837	rs62314653	4	109896462	0.00379212	22.6185	C	A	0.187692	0.0394585	2.24e-06	5944	C	A	7.30748e-05	0.000654658	0.91	462933
genus.Lactobacillus.id.1837	rs7399658	13	23834968	0.003513	23.3063	G	A	-0.107134	0.0221883	3.12e-06	6613	G	A	0.000221568	0.000362182	0.54	462933
genus.Lactobacillus.id.1837	rs75127669	6	151027636	0.00295591	20.2724	C	A	0.139784	0.0310414	6.83e-06	6840	C	A	-0.000386698	0.000548445	0.48	462933
genus.Lactobacillus.id.1837	rs768253	8	69010103	0.00304499	21.2456	T	G	-0.079195	0.0171791	4.25e-06	6958	T	G	0.000214471	0.000298291	0.47	462933
genus.Lactobacillus.id.1837	rs77478751	3	173151665	0.0057883	21.3493	A	G	-0.219886	0.0475759	7.33e-06	3669	A	G	0.00019236	0.000594971	0.75	462933
genus.Lactobacillus.id.1837	rs921925	19	6928017	0.00336817	23.4879	A	C	0.0985077	0.0203229	9.72e-07	6952	A	C	0.000412248	0.00035811	0.25	462933
genus.Lactococcus.id.1851	rs10417872	19	28767353	0.00570582	23.2641	T	G	0.118306	0.024522	1.29e-06	4056	T	G	0.000542927	0.000325834	0.0959997	462933
genus.Lactococcus.id.1851	rs123059	17	2699935	0.00654429	24.7555	T	C	-0.13671	0.0274694	1.27e-06	3760	T	C	0.00013719	0.000345843	0.69	462933
genus.Lactococcus.id.1851	rs12621813	2	31266049	0.00500624	20.4025	G	A	0.108423	0.0239978	6.61e-06	4057	G	A	-0.000147464	0.000316805	0.64	462933
genus.Lactococcus.id.1851	rs17168302	7	14650221	0.00504565	20.3915	G	A	0.191857	0.0424761	6.29e-06	4023	G	A	6.09037e-05	0.000590586	0.92	462933
genus.Lactococcus.id.1851	rs2293361	2	54114864	0.00561099	21.3574	C	T	-0.199221	0.0430969	1.4e-06	3787	C	T	-0.000710594	0.000606473	0.24	462933
genus.Lactococcus.id.1851	rs34757988	18	64699550	0.00698545	28.5112	G	C	0.122294	0.0228976	8.95e-08	4055	G	C	1.26132e-05	0.000299205	0.97	462933
genus.Lactococcus.id.1851	rs4766997	12	113161438	0.00566945	23.0979	C	T	0.114599	0.023839	2.06e-06	4053	C	T	5.11981e-05	0.000316847	0.87	462933
genus.Lactococcus.id.1851	rs55910161	10	71518643	0.00588141	22.6827	C	T	0.146426	0.0307367	2.36e-06	3836	C	T	-0.000184243	0.00040409	0.649999	462933
genus.Lactococcus.id.1851	rs6674304	1	116887742	0.00530096	20.608	C	T	0.200758	0.0442121	6.18e-06	3869	C	T	0.000673119	0.00056659	0.23	462933
genus.Lactococcus.id.1851	rs757872	22	31532568	0.00682506	26.0447	G	C	0.140799	0.027582	4.37e-07	3792	G	C	0.000472662	0.000350434	0.18	462933
genus.Lactococcus.id.1851	rs7992246	13	113472525	0.00500264	20.3877	T	C	0.104232	0.0230786	4.45e-06	4057	T	C	0.00021096	0.000302525	0.49	462933
genus.Marvinbryantia.id.2005	rs11620597	13	86079090	0.00175013	19.336	T	C	0.119479	0.0271688	7.8e-06	11031	T	C	0.000662666	0.000589758	0.26	462933
genus.Marvinbryantia.id.2005	rs11645029	16	5938448	0.00181012	21.2295	G	C	-0.060618	0.0131551	4.15e-06	11709	G	C	-0.000463842	0.000294384	0.12	462933
genus.Marvinbryantia.id.2005	rs1187983	1	58441860	0.00196739	23.4463	C	T	-0.0935456	0.0193174	2.02e-06	11896	C	T	-0.000732074	0.000427735	0.0870001	462933
genus.Marvinbryantia.id.2005	rs12963345	18	46255637	0.00173522	20.3495	G	C	-0.059681	0.0132289	6.6e-06	11709	G	C	-0.00011547	0.000321176	0.719999	462933
genus.Marvinbryantia.id.2005	rs146541147	19	4542097	0.00181551	19.5995	G	A	0.118845	0.0268423	6.86e-06	10778	G	A	5.45936e-07	0.000585101	1	462933
genus.Marvinbryantia.id.2005	rs2724813	10	12516924	0.00216415	25.1759	A	G	-0.0840769	0.0167551	6.28e-07	11610	A	G	0.000580275	0.000382082	0.13	462933
genus.Marvinbryantia.id.2005	rs2842896	6	132881664	0.00208967	24.515	C	T	-0.0649396	0.0131146	7.25e-07	11709	C	T	-0.000128199	0.000298496	0.67	462933
genus.Marvinbryantia.id.2005	rs2863363	3	166039765	0.00181161	21.6844	A	G	0.0634861	0.0136323	3.11e-06	11950	A	G	0.000570589	0.000302801	0.0599998	462933
genus.Marvinbryantia.id.2005	rs3125832	1	211400180	0.00174581	20.4739	A	C	0.0679323	0.015012	5.03e-06	11709	A	C	-3.79856e-05	0.000337478	0.91	462933
genus.Marvinbryantia.id.2005	rs61884471	11	45826561	0.00216546	25.0806	G	A	0.124426	0.0248431	1.01e-06	11559	G	A	0.000273579	0.000560363	0.630001	462933
genus.Marvinbryantia.id.2005	rs72948274	11	79518683	0.0018602	21.5421	A	C	-0.126354	0.0272212	3.26e-06	11561	A	C	-0.000252944	0.000623869	0.69	462933
genus.Marvinbryantia.id.2005	rs8006832	14	21577837	0.00168983	19.3136	G	T	-0.0952415	0.0216699	6.58e-06	11412	G	T	0.000618811	0.000471793	0.19	462933
genus.Methanobrevibacter.id.123	rs10202904	2	125440268	0.00617426	22.2474	T	G	-0.112811	0.0239106	3.09e-06	3583	T	G	0.000116727	0.000295034	0.69	462933
genus.Methanobrevibacter.id.123	rs11018665	11	89349287	0.00547551	19.7323	A	T	0.113013	0.0254343	7.03e-06	3586	A	T	-0.000501203	0.000304692	0.1	462933
genus.Methanobrevibacter.id.123	rs1334944	10	112266046	0.00563712	20.318	T	C	0.115197	0.0255492	7.61e-06	3586	T	C	0.000185928	0.000309557	0.55	462933
genus.Methanobrevibacter.id.123	rs4779844	15	31516919	0.0054231	19.5369	G	C	0.109639	0.0247979	9.28e-06	3585	G	C	-0.000102374	0.000303013	0.74	462933
genus.Methanobrevibacter.id.123	rs4802933	19	52925820	0.00537352	19.3627	A	G	-0.135628	0.0308139	9.74e-06	3586	A	G	0.00021699	0.000394314	0.58	462933
genus.Methanobrevibacter.id.123	rs6776814	3	15053083	0.00613025	20.2374	T	C	-0.188956	0.0419905	8.05e-06	3283	T	C	3.27011e-05	0.000490924	0.95	462933
genus.Methanobrevibacter.id.123	rs76029318	13	41963791	0.00705357	24.0459	T	C	0.222849	0.0454319	1.08e-06	3387	T	C	-0.000237727	0.000561317	0.67	462933
genus.Methanobrevibacter.id.123	rs894996	4	104418307	0.00630195	22.0509	C	A	0.214213	0.0456045	3.82e-06	3479	C	A	0.000692575	0.000546328	0.2	462933
genus.Odoribacter.id.952	rs10093869	8	1266824	0.00149121	21.2308	A	G	-0.0577795	0.0125389	3.67e-06	14218	A	G	-0.000695139	0.000309107	0.025	462933
genus.Odoribacter.id.952	rs10423795	19	49523088	0.0014593	20.6544	C	T	0.0550695	0.0121164	6.58e-06	14135	C	T	-0.000118255	0.000297233	0.69	462933
genus.Odoribacter.id.952	rs16918425	11	6848360	0.00145595	19.9566	A	T	0.0999781	0.0223785	8.85e-06	13689	A	T	0.00055676	0.000568071	0.33	462933
genus.Odoribacter.id.952	rs28417404	14	70944224	0.00137858	20.2876	A	G	-0.0726896	0.0161372	3.68e-06	14698	A	G	0.000519027	0.00039576	0.19	462933
genus.Odoribacter.id.952	rs4793970	17	46763962	0.00135395	19.9098	A	G	-0.0576329	0.0129154	6.03e-06	14687	A	G	-2.38884e-05	0.000322734	0.94	462933
genus.Odoribacter.id.952	rs503751	15	58063881	0.00189872	27.0435	C	G	0.0618294	0.0118887	2.08e-07	14218	C	G	-0.000171666	0.000292183	0.56	462933
genus.Odoribacter.id.952	rs6856150	4	11907559	0.00141164	20.6321	G	A	0.0881922	0.0194146	6.06e-06	14597	G	A	-8.70102e-06	0.000494169	0.99	462933
genus.Odoribacter.id.952	rs74553962	8	69677480	0.00178839	21.1426	T	G	0.121449	0.0264106	9.49e-06	11803	T	G	0.000139246	0.000603798	0.82	462933
genus.Odoribacter.id.952	rs77779484	12	67655943	0.00206633	24.7086	G	A	-0.133489	0.0268526	6.56e-07	11935	G	A	0.00147844	0.000641447	0.021	462933
genus.Olsenella.id.822	rs1035588	2	150077190	0.00554536	20.8386	A	G	-0.108148	0.0236848	4.86e-06	3739	A	G	0.000446865	0.000303251	0.14	462933
genus.Olsenella.id.822	rs17148768	10	10777085	0.00614891	22.5576	G	A	0.140434	0.0295602	2.2e-06	3648	G	A	0.00103	0.000373038	0.00580003	462933
genus.Olsenella.id.822	rs2759329	1	231960352	0.00583552	21.9353	G	A	-0.111131	0.0237218	3.43e-06	3739	G	A	-0.000481121	0.000300332	0.11	462933
genus.Olsenella.id.822	rs35225860	1	247642270	0.00588422	21.4743	A	G	-0.223604	0.0482391	3.87e-06	3630	A	G	-0.00030805	0.000597529	0.61	462933
genus.Olsenella.id.822	rs6046522	20	19969568	0.00556758	20.7322	C	T	0.122938	0.0269928	4.48e-06	3705	C	T	-8.54372e-05	0.000334028	0.8	462933
genus.Olsenella.id.822	rs61090148	4	174810498	0.00545678	20.5039	A	G	-0.104783	0.0231343	6.44e-06	3739	A	G	-4.98752e-05	0.000294402	0.87	462933
genus.Olsenella.id.822	rs62112538	19	4925018	0.00656984	23.993	C	T	-0.19943	0.0407033	1.19e-06	3630	C	T	-0.000242222	0.000532059	0.649999	462933
genus.Olsenella.id.822	rs72691585	9	21884425	0.00737606	22.8573	C	A	-0.249079	0.0520814	2.95e-06	3078	C	A	-0.000844121	0.00064648	0.19	462933
genus.Olsenella.id.822	rs7540303	1	179629191	0.00555654	20.8808	C	T	0.108044	0.023638	5.32e-06	3739	C	T	2.18647e-05	0.000297123	0.94	462933
genus.Olsenella.id.822	rs8066522	17	59632873	0.00522529	19.6295	G	A	-0.106529	0.0240379	9.7e-06	3739	G	A	5.27405e-05	0.000307571	0.86	462933
genus.Olsenella.id.822	rs9460691	6	10422207	0.00530508	19.9308	C	A	0.119966	0.0268645	7.28e-06	3739	C	A	-0.000166709	0.000350702	0.630001	462933
genus.Oscillibacter.id.2063	rs11627628	14	21479605	0.0028911	24.5992	T	C	0.143961	0.0290223	1.01e-06	8486	T	C	7.54154e-05	0.000564422	0.89	462933
genus.Oscillibacter.id.2063	rs11990279	8	11116314	0.00244444	20.8923	T	C	-0.0824934	0.0180457	4.94e-06	8528	T	C	-0.000292879	0.000342136	0.39	462933
genus.Oscillibacter.id.2063	rs12417956	11	25973451	0.00227511	20.3539	C	G	0.0785431	0.0174075	6.03e-06	8928	C	G	9.80971e-05	0.000342011	0.77	462933
genus.Oscillibacter.id.2063	rs12649930	4	3656291	0.00248811	21.93	T	G	0.121589	0.0259612	4.09e-06	8794	T	G	0.00016878	0.000522231	0.75	462933
genus.Oscillibacter.id.2063	rs133832	22	44834707	0.00268076	23.9874	A	C	-0.0795527	0.0162411	1.15e-06	8926	A	C	0.000152286	0.000312344	0.630001	462933
genus.Oscillibacter.id.2063	rs137917150	12	82366390	0.00352838	20.2927	T	A	-0.174992	0.0388394	4.62e-06	5733	T	A	0.000642934	0.000676031	0.34	462933
genus.Oscillibacter.id.2063	rs16866406	2	179457147	0.00250498	22.4206	A	G	0.0988765	0.0208795	3.08e-06	8930	A	G	-0.000339317	0.00042278	0.42	462933
genus.Oscillibacter.id.2063	rs16934185	9	1798324	0.0024873	21.1698	A	G	-0.129568	0.028157	4.38e-06	8492	A	G	-0.000521669	0.000509516	0.31	462933
genus.Oscillibacter.id.2063	rs234108	1	184942671	0.00276624	24.1109	A	G	0.0749553	0.0152632	9.16e-07	8694	A	G	3.67799e-05	0.000292398	0.9	462933
genus.Oscillibacter.id.2063	rs36095275	14	32270129	0.00263914	23.0001	C	T	-0.0752368	0.0156861	1.4e-06	8694	C	T	-0.000147987	0.000303542	0.630001	462933
genus.Oscillibacter.id.2063	rs4506202	8	21598077	0.00250408	21.8201	A	G	-0.0711323	0.0152261	3.21e-06	8694	A	G	-0.00049357	0.000293442	0.0929994	462933
genus.Oscillibacter.id.2063	rs61883564	11	79013843	0.00234931	21.024	A	G	-0.101351	0.0221016	3.39e-06	8930	A	G	-0.00010829	0.000428643	0.8	462933
genus.Oscillibacter.id.2063	rs62206502	20	18003390	0.0022768	20.2664	C	A	-0.0681423	0.0151349	6.6e-06	8883	C	A	-6.60535e-05	0.000293129	0.82	462933
genus.Oscillibacter.id.2063	rs6901560	6	36931994	0.0024482	20.9172	C	G	0.0855032	0.018693	6.21e-06	8525	C	G	0.000503709	0.00036247	0.16	462933
genus.Oscillibacter.id.2063	rs75453768	10	116469806	0.00249696	20.6615	G	T	0.12212	0.0268629	5.35e-06	8256	G	T	-1.90639e-05	0.000516262	0.97	462933
genus.Oscillibacter.id.2063	rs761240	20	49507892	0.00396481	20.6314	T	G	-0.17664	0.0388812	2.04e-06	5185	T	G	0.000712646	0.000552562	0.2	462933
genus.Oscillibacter.id.2063	rs9393920	6	28580593	0.00271311	24.2885	A	G	-0.0744662	0.0151081	9.92e-07	8930	A	G	0.000187796	0.000291525	0.52	462933
genus.Oscillospira.id.2064	rs12206468	6	18093691	0.00253891	24.3134	G	A	-0.133016	0.0269733	1.04e-06	9554	G	A	8.79033e-05	0.000548332	0.87	462933
genus.Oscillospira.id.2064	rs12925026	16	89792856	0.0023766	19.5297	T	C	0.13559	0.030678	9.31e-06	8200	T	C	0.000236171	0.000485761	0.630001	462933
genus.Oscillospira.id.2064	rs1954532	14	28151415	0.00225359	22.2232	T	C	-0.0826246	0.0175252	2.27e-06	9841	T	C	-0.000485386	0.000367535	0.19	462933
genus.Oscillospira.id.2064	rs28889936	4	89483300	0.00208087	20.3433	A	C	0.114051	0.0252838	3.37e-06	9758	A	C	-9.55619e-05	0.000552036	0.86	462933
genus.Oscillospira.id.2064	rs62422654	6	170474630	0.00210142	20.5678	C	T	0.0898456	0.0198088	6.47e-06	9769	C	T	5.11463e-05	0.000395168	0.9	462933
genus.Oscillospira.id.2064	rs72866977	6	56160483	0.00235622	21.4828	A	C	-0.130569	0.0281674	5.63e-06	9098	A	C	-0.000265899	0.000556174	0.630001	462933
genus.Oscillospira.id.2064	rs73038677	3	172373615	0.00238164	24.334	T	A	-0.08321	0.0168666	1.09e-06	10195	T	A	3.34921e-05	0.000361993	0.93	462933
genus.Oscillospira.id.2064	rs751183	1	76803093	0.00205007	20.2121	T	C	-0.0774322	0.0172216	6.85e-06	9841	T	C	-0.000399879	0.000361378	0.27	462933
genus.Oscillospira.id.2064	rs8076323	17	14881860	0.00204481	20.8814	A	G	0.0715392	0.0156539	5.61e-06	10193	A	G	8.54301e-06	0.000333754	0.98	462933
genus.Oxalobacter.id.2978	rs10464997	8	20902693	0.00466939	21.8051	G	A	0.137691	0.0294804	3.3e-06	4650	G	A	0.000391638	0.000428736	0.36	462933
genus.Oxalobacter.id.2978	rs11108500	12	96819204	0.00501952	21.6979	A	G	-0.199099	0.0427327	3.74e-06	4303	A	G	0.00067395	0.00058019	0.25	462933
genus.Oxalobacter.id.2978	rs111966731	15	93941937	0.00516759	20.4089	T	C	0.213114	0.047162	7.3e-06	3931	T	C	0.000481554	0.000610363	0.43	462933
genus.Oxalobacter.id.2978	rs12002250	9	19682558	0.0050199	21.6693	A	C	0.217122	0.0466317	1.42e-06	4297	A	C	-0.000903129	0.000632135	0.15	462933
genus.Oxalobacter.id.2978	rs1569853	6	38550301	0.0047892	21.607	T	C	-0.138078	0.0296981	3.65e-06	4492	T	C	-0.000262265	0.000403371	0.52	462933
genus.Oxalobacter.id.2978	rs36057338	4	189935314	0.0056985	24.3116	G	T	0.207847	0.0421439	8.8e-07	4244	G	T	-0.000467904	0.000573604	0.41	462933
genus.Oxalobacter.id.2978	rs3862635	11	126582578	0.00425268	19.0778	C	T	-0.172142	0.0394026	9.19e-06	4469	C	T	-0.000859048	0.000594963	0.15	462933
genus.Oxalobacter.id.2978	rs4428215	3	171947435	0.00617658	28.9183	G	A	0.130293	0.0242237	7.51e-08	4655	G	A	-2.08297e-05	0.000348043	0.95	462933
genus.Oxalobacter.id.2978	rs6000536	22	37421469	0.00569099	26.626	C	T	-0.130992	0.0253804	2.06e-07	4654	C	T	-0.000232509	0.000364549	0.52	462933
genus.Oxalobacter.id.2978	rs6071435	20	59502888	0.00517455	24.0984	T	A	-0.105512	0.021489	1.07e-06	4635	T	A	0.000525547	0.000301121	0.0810009	462933
genus.Oxalobacter.id.2978	rs6993398	8	115560689	0.00445026	20.8041	G	A	0.127217	0.0278855	7.13e-06	4656	G	A	0.000121596	0.000417157	0.77	462933
genus.Oxalobacter.id.2978	rs736744	9	87514407	0.0066441	31.1218	C	T	0.117882	0.0211262	2.57e-08	4655	C	T	-0.000742605	0.00029773	0.0129999	462933
genus.Parabacteroides.id.954	rs114567323	3	52354847	0.00360185	21.1723	T	C	0.186478	0.0405199	5.65e-06	5859	T	C	0.000762535	0.000687149	0.27	462933
genus.Parabacteroides.id.954	rs115602804	3	191572365	0.00130472	21.4149	G	A	0.10308	0.0222736	1.93e-06	16394	G	A	-0.000584277	0.000633215	0.36	462933
genus.Parabacteroides.id.954	rs17141986	16	7045276	0.00119608	20.1457	G	C	0.0500303	0.0111459	7.27e-06	16825	G	C	0.00056996	0.000297921	0.0560003	462933
genus.Parabacteroides.id.954	rs3860755	5	169360155	0.00132567	22.954	G	C	0.0558784	0.0116625	1.71e-06	17294	G	C	0.000203183	0.000318341	0.52	462933
genus.Parabacteroides.id.954	rs4236095	6	47368687	0.00143489	23.5387	G	A	0.0761961	0.0157042	1.93e-06	16383	G	A	-0.000143149	0.000423311	0.74	462933
genus.Parabacteroides.id.954	rs60884758	9	2217340	0.00140902	24.3978	C	T	-0.0702667	0.0142249	5.71e-07	17293	C	T	2.52302e-05	0.00038607	0.95	462933
genus.Parabacteroides.id.954	rs6657302	1	85585609	0.00129601	21.4768	T	C	-0.10452	0.0225521	9.76e-06	16552	T	C	0.00022162	0.000622041	0.719999	462933
genus.Parabacteroides.id.954	rs72893646	2	38037203	0.00126221	20.8604	A	T	-0.0715594	0.0156668	8.83e-06	16508	A	T	-0.000226411	0.000400194	0.57	462933
genus.Parabacteroides.id.954	rs7298818	12	56396953	0.00118416	19.5712	C	T	0.0888832	0.0200902	8.54e-06	16510	C	T	0.000479441	0.000521465	0.36	462933
genus.Paraprevotella.id.962	rs10842464	12	25249743	0.00268223	19.2994	T	C	-0.0758215	0.0172568	6.6e-06	7178	T	C	0.000261274	0.000294151	0.37	462933
genus.Paraprevotella.id.962	rs140997932	3	149298792	0.00338567	21.0115	T	C	-0.162376	0.0354178	2.11e-06	6187	T	C	0.000723286	0.000567425	0.2	462933
genus.Paraprevotella.id.962	rs145020347	11	114526679	0.00328112	22.5727	A	G	-0.12465	0.0262323	4.03e-06	6859	A	G	0.000374686	0.00045842	0.41	462933
genus.Paraprevotella.id.962	rs17109926	12	71978728	0.00290325	20.8973	A	G	-0.0988335	0.0216172	6.75e-06	7179	A	G	0.000146936	0.000377575	0.7	462933
genus.Paraprevotella.id.962	rs17785622	6	83459314	0.00676219	22.3718	A	G	0.248065	0.0524304	1.93e-06	3288	A	G	7.76374e-05	0.000615293	0.9	462933
genus.Paraprevotella.id.962	rs2081023	5	174606261	0.00372725	26.8468	A	G	-0.122561	0.0236507	2.64e-07	7178	A	G	0.000242341	0.000450348	0.59	462933
genus.Paraprevotella.id.962	rs3008582	1	195971173	0.00300742	21.6373	T	C	0.10572	0.0227246	4.36e-06	7175	T	C	-5.92496e-05	0.000407023	0.88	462933
genus.Paraprevotella.id.962	rs3801748	7	81759508	0.00286465	20.6187	G	A	0.0779721	0.0171691	5.2e-06	7179	G	A	8.27844e-05	0.000301661	0.780001	462933
genus.Paraprevotella.id.962	rs4756632	11	41079703	0.00318787	22.9525	G	T	-0.138905	0.0289897	3.82e-06	7179	G	T	-0.000376619	0.000546761	0.49	462933
genus.Paraprevotella.id.962	rs4767113	12	114131978	0.00332901	23.0402	C	T	0.0882466	0.018382	2.14e-06	6900	C	T	0.000157627	0.000318289	0.62	462933
genus.Paraprevotella.id.962	rs7240324	18	69623804	0.00293556	20.3091	T	G	-0.10229	0.0226948	5.96e-06	6900	T	G	0.000229583	0.000377085	0.54	462933
genus.Paraprevotella.id.962	rs9602779	13	86162420	0.00325849	23.4561	A	C	-0.106692	0.0220264	6.93e-07	7177	A	C	8.3056e-05	0.00037301	0.82	462933
genus.Paraprevotella.id.962	rs9900242	17	69135631	0.00342294	23.6926	A	G	-0.0852967	0.0175212	1.14e-06	6900	A	G	0.000325006	0.000295276	0.27	462933
genus.Parasutterella.id.2892	rs10899911	10	44293839	0.00205346	23.4247	A	G	-0.0717102	0.0148151	1.15e-06	11386	A	G	0.000142149	0.000323912	0.66	462933
genus.Parasutterella.id.2892	rs11715853	3	30163689	0.00180478	20.5828	G	A	-0.0662952	0.0146114	6.23e-06	11386	G	A	-0.000226804	0.000322149	0.48	462933
genus.Parasutterella.id.2892	rs1403396	12	126498824	0.00198595	22.6371	A	T	-0.0756729	0.0159035	2.76e-06	11378	A	T	-6.45947e-06	0.000348333	0.99	462933
genus.Parasutterella.id.2892	rs2090816	6	137615592	0.00197187	22.4901	A	C	0.0840967	0.0177315	2.9e-06	11385	A	C	-0.000268816	0.000392951	0.49	462933
genus.Parasutterella.id.2892	rs2387977	20	25599776	0.00225117	25.5927	T	C	-0.0681778	0.0134756	5.38e-07	11345	T	C	-0.000207049	0.000306448	0.5	462933
genus.Parasutterella.id.2892	rs35055552	8	114804024	0.00216714	21.649	T	C	0.109554	0.0235433	3.35e-06	9970	T	C	-0.000725262	0.000496397	0.14	462933
genus.Parasutterella.id.2892	rs35414597	4	15565736	0.00203519	23.2158	T	A	-0.0684946	0.0142143	1.51e-06	11386	T	A	-0.000666899	0.000310391	0.032	462933
genus.Parasutterella.id.2892	rs55877868	17	14692867	0.00197696	20.9696	A	C	-0.104458	0.0228089	2.87e-06	10588	A	C	0.000573579	0.000485509	0.24	462933
genus.Parasutterella.id.2892	rs62273907	3	156550415	0.0056233	20.8617	A	G	0.229468	0.0502262	5.88e-06	3691	A	G	-0.000160374	0.000671174	0.81	462933
genus.Parasutterella.id.2892	rs6809952	3	193896709	0.00185681	20.6024	G	A	-0.0684957	0.0150892	8.13e-06	11077	G	A	-0.000297453	0.00032107	0.35	462933
genus.Parasutterella.id.2892	rs6828768	4	65556925	0.00202043	23.0472	C	T	0.0636852	0.0132645	1.78e-06	11386	C	T	-5.57383e-05	0.00029064	0.85	462933
genus.Parasutterella.id.2892	rs7303158	12	5275540	0.00203468	23.2101	C	T	0.0646859	0.0134256	1.33e-06	11386	C	T	8.93189e-05	0.000293057	0.760001	462933
genus.Parasutterella.id.2892	rs7311004	12	53260710	0.00179621	20.4812	T	C	-0.0617522	0.0136438	5.92e-06	11384	T	C	0.00073697	0.000298813	0.0140001	462933
genus.Parasutterella.id.2892	rs7572229	2	72235444	0.00218519	24.9242	G	A	0.066273	0.0132736	6.32e-07	11383	G	A	0.000491934	0.000292265	0.0920005	462933
genus.Parasutterella.id.2892	rs78383039	2	178954708	0.00263638	24.2448	T	C	-0.146315	0.0297119	1.57e-06	9174	T	C	-0.000644892	0.000600934	0.28	462933
genus.Parasutterella.id.2892	rs8039785	15	67316307	0.00189529	21.6113	T	G	0.0618345	0.0133	3.62e-06	11383	T	G	0.000128372	0.000291357	0.66	462933
genus.Parasutterella.id.2892	rs823424	8	16674526	0.00181133	20.6576	G	A	-0.0713448	0.0156958	4.95e-06	11386	G	A	0.000201548	0.000352392	0.57	462933
genus.Peptococcus.id.2037	rs10031059	4	35358594	0.0051818	28.7734	T	C	-0.121167	0.0225844	1.24e-07	5526	T	C	-0.000622495	0.000345079	0.0710003	462933
genus.Peptococcus.id.2037	rs11001941	10	78716030	0.00441654	24.8645	G	A	-0.195611	0.0392217	1.33e-06	5607	G	A	-0.000433741	0.000591119	0.46	462933
genus.Peptococcus.id.2037	rs11030569	11	4019788	0.00404335	21.6263	A	T	-0.17402	0.0374133	3.13e-06	5329	A	T	0.000507629	0.000567816	0.37	462933
genus.Peptococcus.id.2037	rs12069354	1	216223782	0.0036323	19.5036	C	T	0.16763	0.03795	9.28e-06	5352	C	T	-0.000197911	0.000596171	0.74	462933
genus.Peptococcus.id.2037	rs2054133	2	33691809	0.00398017	22.5978	G	A	0.0895433	0.0188332	2.14e-06	5657	G	A	-5.55547e-06	0.000294501	0.98	462933
genus.Peptococcus.id.2037	rs34282744	15	75073172	0.00435807	23.0019	G	C	0.191797	0.0399832	1.84e-06	5257	G	C	-0.000414059	0.000620643	0.5	462933
genus.Peptococcus.id.2037	rs36121075	20	43118017	0.00396355	21.0864	A	G	-0.14067	0.030628	6.99e-06	5301	A	G	-0.000858374	0.000461294	0.0629999	462933
genus.Peptococcus.id.2037	rs413827	14	57985112	0.00391328	21.529	G	A	0.110229	0.0237523	3.3e-06	5482	G	A	-0.000409678	0.000361132	0.26	462933
genus.Peptococcus.id.2037	rs5770862	22	50973113	0.00378197	20.6103	T	C	0.162018	0.0356813	3.22e-06	5431	T	C	-0.00146074	0.000555811	0.00860003	462933
genus.Peptococcus.id.2037	rs62424012	6	99020209	0.0038825	22.0372	G	A	0.137164	0.0292136	1.15e-06	5656	G	A	-0.000273199	0.00046136	0.55	462933
genus.Peptococcus.id.2037	rs7033353	9	104595848	0.00396606	22.5174	T	G	0.090152	0.018995	2.22e-06	5657	T	G	-0.000386186	0.000296256	0.19	462933
genus.Peptococcus.id.2037	rs72850165	11	968356	0.00353911	19.9782	T	C	-0.134304	0.0300423	5.74e-06	5627	T	C	0.000575843	0.000463101	0.21	462933
genus.Peptococcus.id.2037	rs74592222	1	75971700	0.00387588	20.7272	G	A	0.137957	0.0302965	8.55e-06	5329	G	A	-0.00052613	0.000471094	0.26	462933
genus.Peptococcus.id.2037	rs75754569	3	17793504	0.00585169	32.2501	C	G	0.181434	0.0319429	1.1e-08	5481	C	G	-0.000180192	0.000495667	0.719999	462933
genus.Peptococcus.id.2037	rs7766680	6	162239191	0.00366569	20.7984	G	C	0.0976832	0.0214155	3.51e-06	5655	G	C	0.000377215	0.000324725	0.25	462933
genus.Peptococcus.id.2037	rs77681628	13	91182556	0.00549312	26.7336	C	T	0.200307	0.0387328	2.69e-07	4842	C	T	0.000364077	0.000610907	0.55	462933
genus.Phascolarctobacterium.id.2168	rs11929846	4	17051156	0.0017496	19.4756	T	C	-0.0697199	0.0157969	8.88e-06	11114	T	C	-0.000368609	0.000357294	0.3	462933
genus.Phascolarctobacterium.id.2168	rs12618201	2	174436533	0.001936	21.5526	A	G	0.0641657	0.0138202	3.38e-06	11113	A	G	-0.000310572	0.000302724	0.3	462933
genus.Phascolarctobacterium.id.2168	rs1264476	8	102434276	0.00191966	21.353	T	G	0.0767335	0.0166041	4.3e-06	11104	T	G	0.000327019	0.000359893	0.36	462933
genus.Phascolarctobacterium.id.2168	rs28525131	14	21358155	0.00185658	19.4466	G	A	-0.118657	0.0269048	8.23e-06	10457	G	A	5.80097e-06	0.000564731	0.99	462933
genus.Phascolarctobacterium.id.2168	rs56069061	3	168339417	0.00211045	23.2746	G	A	-0.111306	0.0230694	1.87e-06	11007	G	A	-0.000579817	0.000473002	0.22	462933
genus.Phascolarctobacterium.id.2168	rs56157888	4	183252836	0.00240987	24.227	A	C	0.0954864	0.0193976	1.09e-06	10031	A	C	-0.000472067	0.000400121	0.24	462933
genus.Phascolarctobacterium.id.2168	rs6427992	1	203102563	0.00202179	22.5097	G	C	-0.0652458	0.0137508	2.09e-06	11113	G	C	8.93627e-05	0.000296619	0.760001	462933
genus.Phascolarctobacterium.id.2168	rs74540770	3	186553389	0.00232312	21.8905	G	A	-0.121014	0.0258621	3.6e-06	9403	G	A	-0.000442227	0.000522167	0.4	462933
genus.Phascolarctobacterium.id.2168	rs74847270	22	47841258	0.00185436	20.6142	A	G	-0.104889	0.0230998	5.73e-06	11098	A	G	-0.000474025	0.000480302	0.32	462933
genus.Phascolarctobacterium.id.2168	rs75882962	12	53098742	0.00240644	25.8303	T	C	0.0968661	0.0190575	3.19e-07	10710	T	C	-1.7828e-05	0.000414449	0.97	462933
genus.Phascolarctobacterium.id.2168	rs76124218	17	73584441	0.00291663	21.3888	C	G	-0.159361	0.0344532	2.67e-06	7314	C	G	9.56071e-05	0.000636285	0.88	462933
genus.Phascolarctobacterium.id.2168	rs7982713	13	71376322	0.001849	19.8358	G	A	0.0726922	0.0163201	9.72e-06	10710	G	A	0.000170815	0.000355294	0.630001	462933
genus.Prevotella7.id.11182	rs118038478	16	47237609	0.00580483	19.2269	A	G	0.205676	0.0468917	7.85e-06	3295	A	G	-0.000159471	0.000545392	0.77	462933
genus.Prevotella7.id.11182	rs12124567	1	3343802	0.00588887	19.4358	A	G	-0.121281	0.0275017	9.49e-06	3283	A	G	0.000250899	0.00032426	0.44	462933
genus.Prevotella7.id.11182	rs12195431	6	91019654	0.00562626	19.7298	T	C	0.196528	0.0442322	8.73e-06	3489	T	C	-0.000130324	0.000565978	0.82	462933
genus.Prevotella7.id.11182	rs16937247	11	19943115	0.0049305	17.263	G	C	0.146098	0.0351529	9.64e-06	3486	G	C	-0.00024766	0.000445076	0.58	462933
genus.Prevotella7.id.11182	rs2240542	2	242066314	0.00607137	21.3002	C	T	0.12085	0.0261776	4.84e-06	3489	C	T	0.000891226	0.000322176	0.00569994	462933
genus.Prevotella7.id.11182	rs2918132	10	133000320	0.00605937	20.2153	C	T	-0.114648	0.0254916	6.42e-06	3318	C	T	0.000202367	0.000303357	0.5	462933
genus.Prevotella7.id.11182	rs430270	3	60474379	0.0065703	21.9312	A	C	0.139155	0.0297055	2.87e-06	3318	A	C	0.000610561	0.000370355	0.0990011	462933
genus.Prevotella7.id.11182	rs57404562	2	12101762	0.00689285	24.1883	C	A	0.155486	0.0316057	6.22e-07	3487	C	A	-0.000197701	0.00037439	0.6	462933
genus.Prevotella7.id.11182	rs79263163	11	39821773	0.00595216	20.8795	A	C	-0.143982	0.031501	7.51e-06	3489	A	C	-0.0003041	0.000391725	0.44	462933
genus.Prevotella7.id.11182	rs9426434	1	29736216	0.00590601	19.7007	T	C	-0.123657	0.0278514	9.72e-06	3318	T	C	-0.000447589	0.00033521	0.18	462933
genus.Prevotella7.id.11182	rs9608249	22	24613952	0.00631551	22.1176	A	G	-0.158213	0.0336317	2.07e-06	3482	A	G	0.000625677	0.000410616	0.13	462933
genus.Prevotella7.id.11182	rs9959718	18	71442664	0.00664324	23.3199	G	A	0.133012	0.0275361	1.9e-06	3489	G	A	0.000471096	0.000335161	0.16	462933
genus.Prevotella9.id.11183	rs10512344	9	109009495	0.00670347	20.6578	C	G	0.247373	0.0544087	3.19e-06	3063	C	G	0.000178029	0.000727331	0.81	462933
genus.Prevotella9.id.11183	rs111509883	19	639161	0.0034699	24.2276	T	C	0.171131	0.0347624	1.24e-06	6960	T	C	-0.000311482	0.000589552	0.6	462933
genus.Prevotella9.id.11183	rs11199734	10	122819400	0.00200874	20.6532	A	T	0.0770209	0.0169462	7e-06	10263	A	T	0.000280635	0.000357843	0.43	462933
genus.Prevotella9.id.11183	rs11685699	2	11232685	0.00273262	22.8525	C	T	-0.141357	0.0295665	2.03e-06	8342	C	T	0.000749366	0.000543079	0.17	462933
genus.Prevotella9.id.11183	rs117271932	22	44236460	0.00455608	22.3171	A	G	0.208089	0.0440393	2.82e-06	4878	A	G	0.00012258	0.000643609	0.85	462933
genus.Prevotella9.id.11183	rs12648235	4	161115744	0.00190126	19.5613	T	C	0.0785902	0.0177676	7.39e-06	10271	T	C	-0.000514733	0.000426223	0.23	462933
genus.Prevotella9.id.11183	rs1304512	5	63736025	0.00214841	21.0739	G	A	0.0761593	0.0165885	5.29e-06	9790	G	A	5.99965e-05	0.000343552	0.86	462933
genus.Prevotella9.id.11183	rs16966465	15	38513730	0.00196718	20.221	G	C	0.0743348	0.0165291	9.33e-06	10261	G	C	-0.000150927	0.000359121	0.67	462933
genus.Prevotella9.id.11183	rs2104588	10	12497581	0.0021228	19.7117	T	C	0.105558	0.023773	8.13e-06	9268	T	C	-0.000294994	0.000467599	0.53	462933
genus.Prevotella9.id.11183	rs2495052	1	14161251	0.00201889	19.8008	A	G	0.0838978	0.0188523	8.97e-06	9790	A	G	-0.000460337	0.000386842	0.23	462933
genus.Prevotella9.id.11183	rs2683313	8	19115604	0.00222147	22.8386	A	G	-0.0724576	0.0151603	1.69e-06	10260	A	G	-0.000141706	0.000311467	0.649999	462933
genus.Prevotella9.id.11183	rs4968431	17	59421778	0.00191586	19.7118	G	T	0.0640113	0.0144162	8.58e-06	10271	G	T	-0.000141778	0.000299563	0.64	462933
genus.Prevotella9.id.11183	rs7232121	18	19993452	0.00220786	21.6583	G	C	0.0671292	0.014423	3.76e-06	9790	G	C	0.000237836	0.000296278	0.42	462933
genus.Prevotella9.id.11183	rs7237249	18	71992502	0.00198786	20.454	C	T	-0.0823764	0.0182126	8.93e-06	10271	C	T	-0.000185603	0.000378615	0.62	462933
genus.Prevotella9.id.11183	rs72815774	2	91954502	0.00349529	20.0842	T	C	-0.176186	0.0393068	8.78e-06	5728	T	C	-0.000189097	0.000541502	0.73	462933
genus.Prevotella9.id.11183	rs746764	20	21470713	0.00238719	22.4526	T	C	-0.0915772	0.0193245	2.04e-06	9385	T	C	2.92631e-05	0.000381684	0.94	462933
genus.Prevotella9.id.11183	rs7976209	12	1794470	0.00188199	19.3475	T	C	-0.0870786	0.0197951	7.28e-06	10263	T	C	-0.000587158	0.000415172	0.16	462933
genus.Prevotella9.id.11183	rs9428102	1	118852817	0.00190281	19.5639	A	G	-0.0778844	0.0176068	4.62e-06	10264	A	G	0.000104095	0.000355571	0.77	462933
genus.Prevotella9.id.11183	rs9613013	22	26152738	0.00208888	20.4888	G	A	0.0917591	0.0202697	6.1e-06	9790	G	A	0.000302777	0.000428781	0.48	462933
genus.RikenellaceaeRC9gutgroup.id.11191	rs12501673	4	163830516	0.00587361	19.6865	A	G	0.116395	0.0262253	6.29e-06	3334	A	G	-0.00023431	0.000304837	0.44	462933
genus.RikenellaceaeRC9gutgroup.id.11191	rs17032291	4	155865671	0.00657093	21.1925	T	C	-0.169579	0.0368251	6.61e-06	3206	T	C	0.000885249	0.000421985	0.0359998	462933
genus.RikenellaceaeRC9gutgroup.id.11191	rs17582787	4	149562638	0.00644421	21.5206	A	G	-0.157739	0.0339924	3.55e-06	3320	A	G	0.000569049	0.000415696	0.17	462933
genus.RikenellaceaeRC9gutgroup.id.11191	rs2074881	19	1970021	0.0057832	19.2712	T	C	-0.142236	0.032391	9.45e-06	3315	T	C	0.000193502	0.000389972	0.62	462933
genus.RikenellaceaeRC9gutgroup.id.11191	rs2900503	9	112657543	0.00831251	27.8121	G	T	-0.172329	0.0326671	1.55e-07	3320	G	T	-0.000359145	0.000399208	0.37	462933
genus.RikenellaceaeRC9gutgroup.id.11191	rs2998141	10	135010198	0.00645772	21.631	T	C	-0.136346	0.0293073	4.42e-06	3330	T	C	-0.000116686	0.000362409	0.75	462933
genus.RikenellaceaeRC9gutgroup.id.11191	rs4270579	4	84698188	0.00565992	18.9491	G	A	-0.118021	0.0271041	5.46e-06	3331	G	A	-4.02572e-05	0.000325676	0.9	462933
genus.RikenellaceaeRC9gutgroup.id.11191	rs4717843	7	73334987	0.00647709	20.9792	G	T	-0.119376	0.0260548	4.72e-06	3220	G	T	0.000177011	0.000305329	0.56	462933
genus.RikenellaceaeRC9gutgroup.id.11191	rs7113155	11	102429543	0.00635467	21.3092	G	C	0.114423	0.0247798	5.26e-06	3334	G	C	0.000684877	0.000293223	0.02	462933
genus.RikenellaceaeRC9gutgroup.id.11191	rs7193937	16	76605358	0.00618191	20.0171	G	C	0.124153	0.027741	6.19e-06	3220	G	C	-0.000197137	0.000348251	0.57	462933
genus.RikenellaceaeRC9gutgroup.id.11191	rs7712231	5	31406285	0.00592923	19.874	A	G	0.156284	0.0350462	7.97e-06	3334	A	G	-0.000520027	0.000409213	0.2	462933
genus.RikenellaceaeRC9gutgroup.id.11191	rs80309088	6	165668732	0.0064583	20.5929	G	A	0.17405	0.0383423	4.56e-06	3170	G	A	0.000893598	0.000449437	0.0470002	462933
genus.RikenellaceaeRC9gutgroup.id.11191	rs9887954	1	164800873	0.00634752	21.2595	G	A	-0.114849	0.0249013	4.81e-06	3330	G	A	0.00022097	0.000296596	0.46	462933
genus.Romboutsia.id.11347	rs10279978	7	5319387	0.0016764	23.7458	A	G	-0.0622202	0.0127675	1.17e-06	14143	A	G	-0.00049224	0.000313853	0.12	462933
genus.Romboutsia.id.11347	rs11221428	11	99665050	0.00148426	21.0855	T	C	-0.0726779	0.0158263	6.49e-06	14187	T	C	0.000119698	0.000386357	0.760001	462933
genus.Romboutsia.id.11347	rs114398731	5	57229635	0.00192257	19.8868	G	C	-0.131039	0.0293815	7.96e-06	10326	G	C	0.000902072	0.00064539	0.16	462933
genus.Romboutsia.id.11347	rs16843578	1	171903885	0.00139274	19.7821	C	T	-0.0875276	0.0196779	5.08e-06	14186	C	T	-0.000360922	0.000504838	0.47	462933
genus.Romboutsia.id.11347	rs28603357	7	106406824	0.00551854	20.482	T	C	-0.214911	0.0474739	8.52e-06	3693	T	C	0.000958992	0.00068428	0.16	462933
genus.Romboutsia.id.11347	rs34302036	7	78136725	0.00145979	20.7345	A	G	0.0550261	0.0120835	5.88e-06	14185	A	G	-0.000386588	0.000294706	0.19	462933
genus.Romboutsia.id.11347	rs61841503	10	17019559	0.00215859	29.3467	G	A	0.092888	0.0171454	4e-08	13568	G	A	-0.000407097	0.000388744	0.3	462933
genus.Romboutsia.id.11347	rs62504452	7	145760298	0.00144693	20.5414	A	G	-0.0710048	0.0156654	4.66e-06	14178	A	G	0.000153486	0.000384783	0.69	462933
genus.Romboutsia.id.11347	rs7109293	11	133834657	0.00140933	19.9547	A	G	0.0919112	0.0205738	6.98e-06	14141	A	G	0.00106532	0.000550382	0.0530005	462933
genus.Romboutsia.id.11347	rs75200530	8	5088054	0.00389249	20.492	T	G	-0.190644	0.0421065	5.07e-06	5246	T	G	0.000974092	0.000666905	0.14	462933
genus.Romboutsia.id.11347	rs75987356	2	16066705	0.00203552	21.3431	G	A	-0.129578	0.0280454	6.71e-06	10466	G	A	0.000784066	0.000606032	0.2	462933
genus.Romboutsia.id.11347	rs77702691	13	88725540	0.00163844	20.4895	A	G	-0.094406	0.0208544	7.37e-06	12487	A	G	-0.000679432	0.000484617	0.16	462933
genus.Romboutsia.id.11347	rs9389266	6	135411737	0.00139519	19.8185	T	G	0.0722815	0.0162353	9.38e-06	14187	T	G	-0.000274962	0.00040255	0.49	462933
genus.Romboutsia.id.11347	rs9567264	13	32720756	0.00145743	20.6937	C	T	0.0580018	0.0127495	5.76e-06	14180	C	T	-0.00038054	0.000318141	0.23	462933
genus.Roseburia.id.2012	rs116270582	4	119349	0.00239265	21.8182	T	A	-0.153844	0.0329324	1.2e-06	9099	T	A	-0.000360099	0.000602485	0.55	462933
genus.Roseburia.id.2012	rs12740451	1	95178974	0.00115471	20.6181	T	C	0.0697527	0.0153607	7.34e-06	17837	T	C	0.00050133	0.000420633	0.23	462933
genus.Roseburia.id.2012	rs147990086	1	145655256	0.0010706	19.1178	A	G	-0.0578936	0.01324	8.93e-06	17840	A	G	0.00022662	0.000348042	0.51	462933
genus.Roseburia.id.2012	rs16910295	11	12009569	0.00131295	21.884	T	C	-0.0980434	0.020957	2.91e-06	16648	T	C	0.000330615	0.000567878	0.56	462933
genus.Roseburia.id.2012	rs2034589	16	8307948	0.00145521	26.0047	G	C	0.0629765	0.0123489	5.01e-07	17846	G	C	0.00044431	0.000353346	0.21	462933
genus.Roseburia.id.2012	rs2160994	12	50650057	0.00137217	23.9663	T	C	0.0550687	0.0112481	9.7e-07	17444	T	C	-0.0002337	0.000304586	0.44	462933
genus.Roseburia.id.2012	rs2943022	5	89598914	0.00119668	21.3887	T	C	0.0493786	0.0106763	4.11e-06	17854	T	C	-0.000112062	0.000294473	0.7	462933
genus.Roseburia.id.2012	rs302266	1	194183650	0.00118245	20.1893	T	C	-0.0777312	0.0172985	8.13e-06	17056	T	C	1.54692e-05	0.000462591	0.97	462933
genus.Roseburia.id.2012	rs329182	5	125076494	0.00114065	20.3862	T	C	0.0690327	0.0152884	5.9e-06	17854	T	C	-0.000378245	0.000420969	0.37	462933
genus.Roseburia.id.2012	rs4748237	10	16051097	0.00117849	21.0597	G	C	0.0488326	0.0106404	4.67e-06	17851	G	C	8.95672e-05	0.000293831	0.760001	462933
genus.Roseburia.id.2012	rs55858165	15	86512809	0.00358555	19.5936	A	C	0.179284	0.0404954	9.99e-06	5447	A	C	9.9646e-05	0.000645773	0.88	462933
genus.Roseburia.id.2012	rs57466170	15	37859065	0.0010758	18.6647	C	T	0.0741405	0.0171601	8.3e-06	17333	C	T	-0.000621958	0.000514834	0.23	462933
genus.Roseburia.id.2012	rs6445851	3	57116228	0.00118305	21.1413	G	A	-0.0497336	0.0108158	3.53e-06	17851	G	A	-0.000121634	0.000297674	0.68	462933
genus.Roseburia.id.2012	rs6930661	6	12774611	0.00129709	22.0052	C	T	-0.0961587	0.0204975	2.48e-06	16945	C	T	0.000440347	0.000554733	0.43	462933
genus.Roseburia.id.2012	rs75326254	6	166170836	0.0012903	20.5307	C	T	-0.104628	0.0230897	7.5e-06	15893	C	T	-0.00171135	0.00059908	0.00430002	462933
genus.Roseburia.id.2012	rs78753150	5	144135655	0.00125459	20.4768	A	C	0.0968739	0.0214067	9.98e-06	16303	A	C	2.20624e-05	0.000612046	0.97	462933
genus.Roseburia.id.2012	rs9300744	13	103117486	0.00121576	21.7301	C	T	-0.0588452	0.0126228	4.75e-06	17854	C	T	-0.000226095	0.000343897	0.51	462933
genus.Ruminiclostridium5.id.11355	rs10827477	10	35262588	0.00129739	22.5896	A	G	-0.0547387	0.0115163	2.19e-06	17391	A	G	0.000226735	0.000312516	0.47	462933
genus.Ruminiclostridium5.id.11355	rs113753996	5	32477664	0.00132489	22.1259	T	C	0.0820689	0.0174463	3.99e-06	16680	T	C	-0.000584167	0.000499699	0.24	462933
genus.Ruminiclostridium5.id.11355	rs1223978	13	108775162	0.00114956	20.0011	T	C	0.0484169	0.0108254	8.16e-06	17381	T	C	-0.000187465	0.000297142	0.53	462933
genus.Ruminiclostridium5.id.11355	rs1492620	6	50405920	0.00122119	21.2685	T	C	-0.0830505	0.0180073	3.53e-06	17397	T	C	-0.000251559	0.000505112	0.62	462933
genus.Ruminiclostridium5.id.11355	rs2286384	12	1891043	0.00133773	23.297	G	C	-0.0518814	0.0107482	1.44e-06	17394	G	C	0.000351184	0.000291536	0.23	462933
genus.Ruminiclostridium5.id.11355	rs243585	21	19151940	0.00138475	23.4402	C	G	-0.0585939	0.0121017	1.33e-06	16906	C	G	9.35695e-05	0.000337554	0.780001	462933
genus.Ruminiclostridium5.id.11355	rs2482038	10	12835085	0.00130686	22.7613	C	A	0.0518991	0.0108777	1.7e-06	17396	C	A	-0.000241115	0.000293183	0.41	462933
genus.Ruminiclostridium5.id.11355	rs2791343	8	131316030	0.00119512	20.808	T	C	0.051717	0.0113369	5.54e-06	17392	T	C	4.65307e-05	0.000309794	0.88	462933
genus.Ruminiclostridium5.id.11355	rs2801960	1	41878680	0.00117669	20.4809	C	G	0.0520975	0.0115111	6.21e-06	17387	C	G	0.000134864	0.000315079	0.67	462933
genus.Ruminiclostridium5.id.11355	rs2833828	21	33811886	0.00116481	20.2856	G	A	0.0489617	0.0108702	6.82e-06	17397	G	A	-7.08793e-05	0.000295099	0.81	462933
genus.Ruminiclostridium5.id.11355	rs4955951	3	55243531	0.00106377	18.524	A	G	-0.0713749	0.0165826	9.96e-06	17397	A	G	-0.00047185	0.00046673	0.31	462933
genus.Ruminiclostridium5.id.11355	rs6121460	20	60293505	0.00126494	21.9314	G	A	0.0932955	0.0199206	2.64e-06	17318	G	A	0.00160911	0.000565444	0.00439997	462933
genus.Ruminiclostridium5.id.11355	rs79968837	20	41177956	0.00145059	24.1148	A	G	-0.0950311	0.0193507	1.15e-06	16602	A	G	-4.29979e-05	0.000523096	0.93	462933
genus.Ruminiclostridium5.id.11355	rs8053158	16	86769909	0.00124299	21.6487	A	G	-0.0740543	0.0159151	5.9e-06	17397	A	G	-0.000341105	0.000443795	0.44	462933
genus.Ruminiclostridium6.id.11356	rs10829821	10	132651293	0.00159142	20.4026	T	C	-0.097606	0.0216072	3.47e-06	12802	T	C	0.000610207	0.000483038	0.21	462933
genus.Ruminiclostridium6.id.11356	rs116969552	10	128214403	0.00286601	19.6081	A	G	-0.166823	0.0376681	9.16e-06	6824	A	G	-0.000552691	0.000680073	0.42	462933
genus.Ruminiclostridium6.id.11356	rs11992182	8	79766499	0.00153478	20.5653	A	C	0.0625299	0.0137876	4.65e-06	13381	A	C	9.54134e-05	0.00032795	0.77	462933
genus.Ruminiclostridium6.id.11356	rs1756364	14	20954661	0.0019818	25.6775	G	T	0.0999189	0.0197169	2.54e-07	12933	G	T	0.000907907	0.000531031	0.0870001	462933
genus.Ruminiclostridium6.id.11356	rs1871858	15	61047117	0.00153769	19.7374	C	G	-0.105422	0.0237274	9.12e-06	12818	C	G	-0.000947781	0.000541579	0.08	462933
genus.Ruminiclostridium6.id.11356	rs2548459	19	49209339	0.00152503	20.4285	C	T	0.0554866	0.0122755	6.4e-06	13377	C	T	0.000514678	0.000291313	0.0769999	462933
genus.Ruminiclostridium6.id.11356	rs35362464	4	36478011	0.00142241	18.9536	C	A	0.0720077	0.0165387	8.99e-06	13308	C	A	-0.000212906	0.000388531	0.58	462933
genus.Ruminiclostridium6.id.11356	rs61060922	16	72136154	0.00271506	24.3741	T	G	0.15913	0.0322283	1.09e-06	8955	T	G	-0.000619488	0.000644858	0.34	462933
genus.Ruminiclostridium6.id.11356	rs663262	11	86179076	0.00239041	18.8672	T	C	-0.13498	0.0310715	3.39e-06	7876	T	C	-0.000384658	0.000647097	0.55	462933
genus.Ruminiclostridium6.id.11356	rs67479537	19	10115515	0.00173495	20.1795	T	C	0.118994	0.026487	9.3e-06	11613	T	C	-0.00123363	0.000552292	0.0259998	462933
genus.Ruminiclostridium6.id.11356	rs71414120	14	56938952	0.0043695	24.423	T	G	0.200894	0.0406434	1.08e-06	5567	T	G	0.000828732	0.000620269	0.18	462933
genus.Ruminiclostridium6.id.11356	rs72991535	18	76018244	0.00218409	21.1007	T	G	0.135604	0.0295174	4.95e-06	9642	T	G	-6.26786e-07	0.000634203	1	462933
genus.Ruminiclostridium6.id.11356	rs73176030	7	101271282	0.0014725	19.7252	T	C	0.058665	0.013208	7.29e-06	13378	T	C	0.000238452	0.000310432	0.44	462933
genus.Ruminiclostridium6.id.11356	rs77193512	11	40289063	0.00172531	23.1211	A	G	0.0736533	0.0153163	1.3e-06	13380	A	G	-0.000703678	0.000372801	0.0589997	462933
genus.Ruminiclostridium6.id.11356	rs792058	2	5548605	0.00150757	19.5238	G	A	0.0554234	0.0125423	8.58e-06	12933	G	A	-0.000125361	0.000297671	0.67	462933
genus.Ruminiclostridium6.id.11356	rs79968172	1	240503826	0.00177991	22.8235	G	A	0.11614	0.0243083	1.66e-06	12802	G	A	-0.00114815	0.00062563	0.0659994	462933
genus.Ruminiclostridium6.id.11356	rs9555756	13	111703249	0.00154688	20.7092	A	C	-0.0804138	0.0176692	7.1e-06	13369	A	C	0.000271085	0.000421709	0.52	462933
genus.Ruminiclostridium9.id.11357	rs113048721	9	74214419	0.00122359	20.4799	C	G	0.0600735	0.0132737	4.1e-06	16719	C	G	0.000488232	0.000338441	0.15	462933
genus.Ruminiclostridium9.id.11357	rs115044523	7	47013498	0.00145038	23.3922	G	A	-0.0980026	0.0202616	2.37e-06	16107	G	A	0.000871524	0.000519509	0.0929994	462933
genus.Ruminiclostridium9.id.11357	rs12040548	1	247710285	0.00129806	21.7304	G	T	0.0570422	0.0122359	3.15e-06	16721	G	T	-0.000108716	0.000328146	0.74	462933
genus.Ruminiclostridium9.id.11357	rs12419854	11	68886460	0.00136396	21.8873	T	A	-0.0727975	0.0155594	3.18e-06	16027	T	A	0.000716883	0.000432417	0.0969996	462933
genus.Ruminiclostridium9.id.11357	rs13033315	2	204706865	0.00125712	21.0481	T	A	0.0511195	0.0111418	5.68e-06	16724	T	A	-0.000497432	0.000294085	0.0909997	462933
genus.Ruminiclostridium9.id.11357	rs57665991	3	157841287	0.00161487	27.0491	C	G	-0.0641507	0.0123339	2.07e-07	16725	C	G	7.83461e-06	0.000318372	0.98	462933
genus.Ruminiclostridium9.id.11357	rs6082461	20	2210530	0.00120204	20.0357	A	C	0.0586425	0.0131004	4.87e-06	16650	A	C	-0.000232531	0.000355996	0.51	462933
genus.Ruminiclostridium9.id.11357	rs7137760	12	10702414	0.00122464	20.501	C	T	0.050797	0.0112182	7.07e-06	16722	C	T	0.000285707	0.000296677	0.34	462933
genus.Ruminiclostridium9.id.11357	rs73592673	6	128568828	0.00149448	23.1856	A	T	-0.081629	0.0169515	2.14e-06	15493	A	T	-0.000518934	0.000402246	0.2	462933
genus.Ruminiclostridium9.id.11357	rs74303178	8	14697544	0.00119276	19.9477	T	C	0.0532742	0.0119274	7.92e-06	16706	T	C	0.000239189	0.000320174	0.46	462933
genus.Ruminiclostridium9.id.11357	rs78191726	6	67655320	0.00125848	20.2077	T	C	0.0944998	0.0210206	7.58e-06	16039	T	C	4.38819e-05	0.00051213	0.93	462933
genus.Ruminiclostridium9.id.11357	rs79082720	7	155701010	0.00127484	20.5409	C	G	0.0928576	0.0204871	6.47e-06	16094	C	G	-0.000284476	0.00052812	0.59	462933
genus.Ruminiclostridium9.id.11357	rs918449	19	34371198	0.00138866	23.2548	A	G	-0.0950908	0.0197177	2.56e-06	16725	A	G	0.000293817	0.000564437	0.6	462933
genus.Ruminiclostridium9.id.11357	rs9522712	13	90441578	0.00121798	20.3932	T	C	0.0699728	0.0154939	4.66e-06	16725	T	C	-0.000220695	0.000401248	0.58	462933
genus.Ruminiclostridium9.id.11357	rs9809789	3	29179983	0.00125828	20.1869	C	T	-0.0717454	0.0159673	8.72e-06	16025	C	T	-0.000114457	0.000415443	0.780001	462933
genus.RuminococcaceaeNK4A214group.id.11358	rs11241747	5	123846318	0.00133276	19.7779	C	T	0.0533858	0.0120035	6.59e-06	14822	C	T	-1.43408e-05	0.000300844	0.96	462933
genus.RuminococcaceaeNK4A214group.id.11358	rs114244418	2	235430299	0.00309374	22.0989	C	G	-0.175266	0.0372779	3.59e-06	7123	C	G	-0.000442734	0.00065754	0.5	462933
genus.RuminococcaceaeNK4A214group.id.11358	rs11586410	1	157338888	0.00173864	25.8114	G	A	-0.0863422	0.0169937	3.66e-07	14822	G	A	0.000405955	0.000457454	0.37	462933
genus.RuminococcaceaeNK4A214group.id.11358	rs12642039	4	159932022	0.00140232	21.449	T	C	-0.0553003	0.0119397	3.43e-06	15276	T	C	-0.000664845	0.000305694	0.0299999	462933
genus.RuminococcaceaeNK4A214group.id.11358	rs12731	2	239087912	0.00137405	21.0326	A	G	-0.0527684	0.0115053	4.87e-06	15288	A	G	-0.000423878	0.000293019	0.15	462933
genus.RuminococcaceaeNK4A214group.id.11358	rs13087692	3	84725039	0.00135988	20.8154	T	G	0.0574623	0.012594	8.69e-06	15288	T	G	0.000150223	0.000315107	0.630001	462933
genus.RuminococcaceaeNK4A214group.id.11358	rs136761	22	49796014	0.00163759	24.3089	G	A	-0.0587521	0.0119155	8.15e-07	14822	G	A	0.000659506	0.000299433	0.0280001	462933
genus.RuminococcaceaeNK4A214group.id.11358	rs147475196	3	26509287	0.00206637	20.5305	A	G	-0.133769	0.0295196	4.72e-06	9917	A	G	4.43918e-05	0.000636716	0.94	462933
genus.RuminococcaceaeNK4A214group.id.11358	rs34576931	12	78373555	0.00136621	20.0779	G	C	-0.0873312	0.0194886	4.72e-06	14678	G	C	0.000145413	0.000480996	0.760001	462933
genus.RuminococcaceaeNK4A214group.id.11358	rs35559912	5	35288938	0.00147386	20.6261	T	C	-0.0925071	0.0203674	4.89e-06	13976	T	C	-0.000439117	0.00055016	0.42	462933
genus.RuminococcaceaeNK4A214group.id.11358	rs4814689	20	18030357	0.00157052	22.0329	C	T	-0.1083	0.0230708	4.55e-06	14009	C	T	-0.000177146	0.000525111	0.74	462933
genus.RuminococcaceaeNK4A214group.id.11358	rs5994253	22	17793012	0.00172996	26.4899	A	G	-0.0811302	0.0157621	2.35e-07	15288	A	G	5.76798e-05	0.000392316	0.88	462933
genus.RuminococcaceaeNK4A214group.id.11358	rs62027366	16	24073806	0.0013474	19.9954	T	C	0.0615389	0.0137612	6.58e-06	14822	T	C	0.000305516	0.000350563	0.38	462933
genus.RuminococcaceaeNK4A214group.id.11358	rs6681678	1	100248591	0.00133515	17.4189	C	T	-0.100174	0.024	9.05e-06	13031	C	T	0.00125355	0.000643424	0.051	462933
genus.RuminococcaceaeNK4A214group.id.11358	rs73158814	7	132042135	0.00176126	23.0691	C	G	-0.109257	0.0227458	2.2e-06	13077	C	G	-0.000418918	0.000573777	0.47	462933
genus.RuminococcaceaeNK4A214group.id.11358	rs7573569	2	141897042	0.0014326	21.2616	T	C	0.107739	0.0233638	3.23e-06	14822	T	C	6.95824e-05	0.000619045	0.91	462933
genus.RuminococcaceaeUCG002.id.11360	rs10916131	1	227563126	0.00130382	22.3179	C	T	-0.069333	0.0146753	2.87e-06	17097	C	T	-0.000244231	0.000400331	0.54	462933
genus.RuminococcaceaeUCG002.id.11360	rs10927423	1	14732458	0.00136336	23.3371	C	A	-0.0713617	0.0147712	8.5e-07	17096	C	A	-0.000870757	0.000412438	0.0350002	462933
genus.RuminococcaceaeUCG002.id.11360	rs10964441	9	20131746	0.00348252	18.6756	G	A	-0.14906	0.034486	7.45e-06	5346	G	A	-0.00115472	0.000651675	0.0759994	462933
genus.RuminococcaceaeUCG002.id.11360	rs113147300	9	114066670	0.00129583	21.2377	A	G	-0.075842	0.0164562	7.69e-06	16370	A	G	5.03861e-05	0.000417795	0.9	462933
genus.RuminococcaceaeUCG002.id.11360	rs11607472	11	43344751	0.00120112	19.5778	A	G	-0.0780229	0.0176325	7.19e-06	16282	A	G	-0.000826647	0.000461336	0.0729995	462933
genus.RuminococcaceaeUCG002.id.11360	rs116974815	11	111712942	0.00391823	22.882	C	A	-0.189731	0.0396566	2.03e-06	5819	C	A	0.000528308	0.000627636	0.4	462933
genus.RuminococcaceaeUCG002.id.11360	rs11750293	5	123822114	0.00134531	23.0249	G	T	-0.0578304	0.0120512	1.76e-06	17094	G	T	0.000225367	0.000326239	0.49	462933
genus.RuminococcaceaeUCG002.id.11360	rs12463378	19	54475808	0.00127493	21.6912	A	G	-0.0522061	0.0112086	2.96e-06	16994	A	G	-7.8275e-05	0.000299061	0.79	462933
genus.RuminococcaceaeUCG002.id.11360	rs15256	10	73820548	0.00110597	18.9253	C	T	0.0732376	0.016834	9.46e-06	17095	C	T	-0.000708218	0.000498469	0.16	462933
genus.RuminococcaceaeUCG002.id.11360	rs2265670	1	190171640	0.00128421	21.9805	C	G	-0.0512404	0.0109287	2.99e-06	17096	C	G	0.000509905	0.000292101	0.0810009	462933
genus.RuminococcaceaeUCG002.id.11360	rs362417	14	73589896	0.00120133	20.5614	G	C	-0.054863	0.0120984	7.8e-06	17097	G	C	0.000205814	0.000323275	0.52	462933
genus.RuminococcaceaeUCG002.id.11360	rs55793120	12	47384118	0.00214802	25.1148	T	C	0.137396	0.027414	4.81e-07	11669	T	C	-0.00127279	0.000644263	0.0479999	462933
genus.RuminococcaceaeUCG002.id.11360	rs56030423	15	90780618	0.00137988	20.637	G	A	-0.0982874	0.0216344	6.3e-06	14937	G	A	9.07649e-05	0.000528454	0.86	462933
genus.RuminococcaceaeUCG002.id.11360	rs57079348	13	87920450	0.00119769	19.6296	T	G	-0.076573	0.017282	7.22e-06	16372	T	G	0.000193964	0.000462597	0.68	462933
genus.RuminococcaceaeUCG002.id.11360	rs6542556	2	120757853	0.00116702	19.97	A	G	0.050974	0.011406	7.86e-06	17094	A	G	0.000267468	0.000303979	0.38	462933
genus.RuminococcaceaeUCG002.id.11360	rs67746927	4	12207874	0.00144851	24.1512	C	G	-0.054237	0.0110357	9.17e-07	16651	C	G	-0.000219928	0.000294082	0.450001	462933
genus.RuminococcaceaeUCG002.id.11360	rs6793778	3	24045453	0.00116254	19.8932	C	T	-0.0558706	0.0125258	9.81e-06	17094	C	T	0.000643712	0.00034223	0.0599998	462933
genus.RuminococcaceaeUCG002.id.11360	rs7120052	11	86335459	0.00124162	21.252	A	C	0.0624796	0.0135523	1.97e-06	17097	A	C	-0.00024185	0.000382693	0.53	462933
genus.RuminococcaceaeUCG002.id.11360	rs7155595	14	77502546	0.00138733	23.7312	C	A	0.0569929	0.0116986	1.15e-06	17084	C	A	0.000522964	0.000311639	0.0929994	462933
genus.RuminococcaceaeUCG002.id.11360	rs7249614	19	43637890	0.00118635	19.7751	A	G	-0.0492778	0.0110807	9.07e-06	16651	A	G	-2.06894e-05	0.000297628	0.94	462933
genus.RuminococcaceaeUCG002.id.11360	rs72874194	2	45178830	0.00127228	21.2092	G	C	-0.0770289	0.016725	3.47e-06	16651	G	C	0.000895446	0.000462865	0.0530005	462933
genus.RuminococcaceaeUCG002.id.11360	rs7342369	12	129451330	0.00124129	20.6919	C	A	-0.0527803	0.0116023	5.66e-06	16651	C	A	-0.000271728	0.000311745	0.38	462933
genus.RuminococcaceaeUCG002.id.11360	rs76847269	5	141014951	0.00274617	21.0716	A	G	0.163508	0.0356151	5.17e-06	7654	A	G	-0.000184091	0.000627081	0.77	462933
genus.RuminococcaceaeUCG002.id.11360	rs77564310	15	80713184	0.00150537	25.6268	A	C	-0.0713093	0.0140855	3.29e-07	17000	A	C	0.000626394	0.000365422	0.0860003	462933
genus.RuminococcaceaeUCG002.id.11360	rs79016051	1	238938497	0.00129511	21.9612	C	T	-0.0887747	0.0189424	2.34e-06	16937	C	T	-0.000564342	0.000501809	0.26	462933
genus.RuminococcaceaeUCG002.id.11360	rs882348	4	23325040	0.00117177	20.0549	A	G	-0.0799946	0.0178618	5.45e-06	17097	A	G	-8.77969e-05	0.000492653	0.86	462933
genus.RuminococcaceaeUCG003.id.11361	rs10490280	2	37905976	0.00156811	21.9912	C	T	-0.0672094	0.0143309	4.16e-06	14004	C	T	-1.60959e-05	0.000340513	0.96	462933
genus.RuminococcaceaeUCG003.id.11361	rs11243416	9	134416970	0.00167081	23.4339	T	C	-0.0925653	0.0191203	1.67e-06	14004	T	C	4.18611e-05	0.000487159	0.93	462933
genus.RuminococcaceaeUCG003.id.11361	rs11613919	12	75496463	0.00152353	21.8304	G	T	0.0727604	0.0155716	1.63e-06	14309	G	T	-0.000898744	0.000394566	0.0230001	462933
genus.RuminococcaceaeUCG003.id.11361	rs139730	22	25292719	0.0013941	19.5475	G	C	-0.0577655	0.0130645	9.72e-06	14004	G	C	-0.000376051	0.000331338	0.26	462933
genus.RuminococcaceaeUCG003.id.11361	rs16959793	15	35071718	0.00157207	22.6892	A	C	-0.062527	0.0131259	2.22e-06	14412	A	C	-0.000308945	0.000328547	0.35	462933
genus.RuminococcaceaeUCG003.id.11361	rs2523124	7	97348436	0.00141849	20.4652	T	C	-0.0546625	0.0120823	5.78e-06	14409	T	C	-0.000203574	0.000302285	0.5	462933
genus.RuminococcaceaeUCG003.id.11361	rs3013089	1	13794594	0.00145529	20.9955	G	A	-0.0551473	0.0120346	4.38e-06	14408	G	A	0.000362075	0.000297012	0.22	462933
genus.RuminococcaceaeUCG003.id.11361	rs4452755	8	82026852	0.00153675	22.1694	A	C	-0.0634463	0.0134741	3.29e-06	14406	A	C	0.00028205	0.000326327	0.39	462933
genus.RuminococcaceaeUCG003.id.11361	rs4532474	6	105781538	0.00141119	20.3639	G	A	0.0769231	0.017045	4.82e-06	14412	G	A	-0.000395599	0.000433198	0.36	462933
genus.RuminococcaceaeUCG003.id.11361	rs4629039	18	46485154	0.00141291	20.3776	T	A	0.0553742	0.0122659	6.54e-06	14404	T	A	-0.000643466	0.00030726	0.0359998	462933
genus.RuminococcaceaeUCG003.id.11361	rs646327	19	49209851	0.00170241	24.5633	G	A	0.0586696	0.011837	7.83e-07	14406	G	A	0.0005678	0.000291347	0.051	462933
genus.RuminococcaceaeUCG003.id.11361	rs6759615	2	205238716	0.00181653	26.2202	A	G	0.102523	0.0200204	7.86e-07	14410	A	G	0.000688231	0.000551233	0.21	462933
genus.RuminococcaceaeUCG003.id.11361	rs73341549	7	51541468	0.00419253	28.3851	T	C	-0.169857	0.0318768	1.51e-07	6744	T	C	-7.02348e-06	0.000673734	0.99	462933
genus.RuminococcaceaeUCG003.id.11361	rs78720113	3	41982393	0.00163035	21.3533	A	G	-0.115348	0.0249601	7.59e-06	13078	A	G	-4.04328e-05	0.000568645	0.94	462933
genus.RuminococcaceaeUCG004.id.11362	rs10976229	9	7317307	0.00219026	20.0059	T	G	0.095976	0.0214554	7.04e-06	9116	T	G	0.000254951	0.000427667	0.55	462933
genus.RuminococcaceaeUCG004.id.11362	rs11961899	6	132887921	0.00202068	19.2333	G	A	-0.0707825	0.0161381	9.18e-06	9501	G	A	-0.000647343	0.000321371	0.0439997	462933
genus.RuminococcaceaeUCG004.id.11362	rs12125734	1	103732214	0.00302133	27.0804	G	T	0.133972	0.0257417	2.09e-07	8938	G	T	0.00046007	0.000486531	0.34	462933
genus.RuminococcaceaeUCG004.id.11362	rs2248146	7	24791998	0.00211452	20.1306	T	C	0.0689452	0.0153649	8.2e-06	9502	T	C	-0.000171164	0.000311709	0.58	462933
genus.RuminococcaceaeUCG004.id.11362	rs3800154	6	2119329	0.00214066	20.1739	A	C	-0.0797959	0.0177639	6.12e-06	9406	A	C	-3.78344e-05	0.000373174	0.92	462933
genus.RuminococcaceaeUCG004.id.11362	rs511258	3	169966722	0.00228269	21.7306	G	A	-0.0757474	0.0162475	4.52e-06	9500	G	A	0.000471908	0.000326362	0.15	462933
genus.RuminococcaceaeUCG004.id.11362	rs550351	1	18676399	0.0020022	19.051	A	C	0.078587	0.018003	9.43e-06	9498	A	C	-0.000261031	0.000417286	0.53	462933
genus.RuminococcaceaeUCG004.id.11362	rs6769553	3	54427795	0.00305624	29.1202	A	G	0.0849743	0.0157451	7.91e-08	9501	A	G	-0.000108248	0.000320744	0.74	462933
genus.RuminococcaceaeUCG004.id.11362	rs7123615	11	15771251	0.0020126	19.1582	C	G	-0.0786157	0.0179592	7.09e-06	9502	C	G	3.29894e-05	0.000359699	0.93	462933
genus.RuminococcaceaeUCG004.id.11362	rs7569771	2	239846337	0.00208666	19.8647	A	G	-0.075914	0.0170308	8.12e-06	9502	A	G	-0.000731408	0.000353916	0.0389996	462933
genus.RuminococcaceaeUCG004.id.11362	rs872501	8	139253064	0.00235855	20.0265	G	A	0.116125	0.025946	5.81e-06	8473	G	A	1.55551e-05	0.000619855	0.98	462933
genus.RuminococcaceaeUCG004.id.11362	rs9818949	3	197683751	0.00227362	20.769	G	T	0.0859927	0.0188671	5.39e-06	9116	G	T	0.000346317	0.000378514	0.36	462933
genus.RuminococcaceaeUCG005.id.11363	rs10873449	14	94630731	0.00128345	20.685	T	C	0.0654843	0.0143973	4.11e-06	16098	T	C	-0.00104801	0.000392156	0.00749998	462933
genus.RuminococcaceaeUCG005.id.11363	rs10937802	4	7302344	0.00127424	20.1829	G	A	0.0755811	0.0168226	8.17e-06	15821	G	A	0.000756193	0.000479097	0.11	462933
genus.RuminococcaceaeUCG005.id.11363	rs10950694	7	18026604	0.00161672	25.6164	T	C	0.0577628	0.011412	4.3e-07	15821	T	C	-0.000121271	0.000296031	0.68	462933
genus.RuminococcaceaeUCG005.id.11363	rs114279581	2	198122357	0.00253568	21.514	A	G	-0.146604	0.0316034	3.22e-06	8465	A	G	-0.000320065	0.000609821	0.6	462933
genus.RuminococcaceaeUCG005.id.11363	rs12288512	11	27747671	0.0013752	21.305	A	G	0.066635	0.0144356	3.1e-06	15473	A	G	0.000255515	0.000359969	0.48	462933
genus.RuminococcaceaeUCG005.id.11363	rs12458218	18	22575871	0.00136243	21.9609	T	C	0.0677322	0.0144525	2.41e-06	16099	T	C	-0.000752569	0.000387407	0.0519996	462933
genus.RuminococcaceaeUCG005.id.11363	rs2893871	10	62662781	0.00139128	22.4322	G	A	-0.073644	0.015548	3.54e-06	16103	G	A	8.46024e-05	0.000406886	0.84	462933
genus.RuminococcaceaeUCG005.id.11363	rs34781347	20	16312851	0.00391708	23.8269	G	A	0.188685	0.0386484	6.05e-07	6061	G	A	3.76934e-05	0.000635685	0.95	462933
genus.RuminococcaceaeUCG005.id.11363	rs35166120	8	3099727	0.00136595	22.0082	C	G	-0.0686153	0.0146252	3.75e-06	16092	C	G	-0.000581169	0.000391889	0.14	462933
genus.RuminococcaceaeUCG005.id.11363	rs394449	17	7034575	0.00137844	21.7072	A	T	0.0692909	0.0148712	2.6e-06	15728	A	T	0.000119773	0.000370327	0.75	462933
genus.RuminococcaceaeUCG005.id.11363	rs55793120	12	47384118	0.00168154	18.9021	T	C	0.121548	0.0279546	7.37e-06	11224	T	C	-0.00127279	0.000644263	0.0479999	462933
genus.RuminococcaceaeUCG005.id.11363	rs60081663	5	32755085	0.00261223	24.4621	C	G	0.158082	0.0319586	9.28e-07	9342	C	G	0.000116587	0.000658401	0.86	462933
genus.RuminococcaceaeUCG005.id.11363	rs72776570	10	4240906	0.00126646	19.4953	C	A	0.087067	0.0197179	5.36e-06	15376	C	A	-0.000530068	0.000501246	0.29	462933
genus.RuminococcaceaeUCG005.id.11363	rs7449320	5	154003091	0.0013013	20.9691	C	A	0.0599163	0.0130836	4.81e-06	16095	C	A	-0.00033202	0.000351839	0.35	462933
genus.RuminococcaceaeUCG005.id.11363	rs7555878	1	187906034	0.00136031	21.928	A	G	0.0586677	0.0125277	2.81e-06	16100	A	G	0.000144246	0.000331137	0.66	462933
genus.RuminococcaceaeUCG005.id.11363	rs7586445	2	239509030	0.00130019	19.6545	G	A	0.0782349	0.0176458	8.81e-06	15099	G	A	0.000472356	0.000410837	0.25	462933
genus.RuminococcaceaeUCG005.id.11363	rs898577	15	68705697	0.00183959	18.4095	T	C	-0.123012	0.0286671	7.46e-06	9991	T	C	-0.000648705	0.000601006	0.28	462933
genus.RuminococcaceaeUCG009.id.11366	rs113006825	6	51803869	0.00277483	19.9314	T	C	-0.0928893	0.0208035	7.98e-06	7165	T	C	0.000181663	0.000358892	0.61	462933
genus.RuminococcaceaeUCG009.id.11366	rs12508214	4	7426937	0.00279157	21.0206	C	T	-0.0774649	0.0168937	4.75e-06	7511	C	T	-0.000399455	0.00030744	0.19	462933
genus.RuminococcaceaeUCG009.id.11366	rs138460696	2	66396776	0.0028253	19.4449	A	G	0.139274	0.0315794	9.81e-06	6865	A	G	0.00116316	0.000558564	0.0369999	462933
genus.RuminococcaceaeUCG009.id.11366	rs1550196	17	32786955	0.00335168	24.8421	G	A	0.130842	0.0262478	1.13e-06	7389	G	A	0.000833902	0.000490374	0.089	462933
genus.RuminococcaceaeUCG009.id.11366	rs2058609	12	12970792	0.00289928	21.8311	A	G	0.0816464	0.017472	3.12e-06	7510	A	G	7.92339e-05	0.000306456	0.8	462933
genus.RuminococcaceaeUCG009.id.11366	rs2192926	2	75512668	0.00282655	21.2847	A	G	-0.089048	0.0192989	4.88e-06	7511	A	G	0.000150012	0.000345666	0.66	462933
genus.RuminococcaceaeUCG009.id.11366	rs4079028	1	202299085	0.0028121	21.0882	C	T	0.0915623	0.019936	3.28e-06	7480	C	T	0.000160009	0.00035853	0.66	462933
genus.RuminococcaceaeUCG009.id.11366	rs4708333	6	78106701	0.003069	23.1161	T	G	-0.084033	0.0174757	1.56e-06	7511	T	G	0.00040433	0.00031759	0.2	462933
genus.RuminococcaceaeUCG009.id.11366	rs61779334	1	39983022	0.00324778	22.3622	G	C	-0.138137	0.0292072	1.94e-06	6865	G	C	-0.000102883	0.000504904	0.84	462933
genus.RuminococcaceaeUCG009.id.11366	rs6952765	7	32001710	0.00255892	19.2643	G	A	0.0732099	0.0166777	8.13e-06	7511	G	A	0.000199769	0.000294012	0.5	462933
genus.RuminococcaceaeUCG009.id.11366	rs758191	16	1979831	0.00380599	22.2622	T	G	0.17702	0.0375113	9.01e-06	5829	T	G	0.000323568	0.000667558	0.630001	462933
genus.RuminococcaceaeUCG009.id.11366	rs78410648	19	52399401	0.00252813	19.0293	A	G	0.120989	0.0277317	9.67e-06	7510	A	G	-0.000359367	0.000506477	0.48	462933
genus.RuminococcaceaeUCG009.id.11366	rs8009993	14	39306809	0.00415387	30.8126	G	C	-0.135936	0.0244857	4.42e-08	7389	G	C	-0.000193427	0.000479133	0.69	462933
genus.RuminococcaceaeUCG009.id.11366	rs9558661	13	106650093	0.00266721	19.9988	T	C	-0.0897823	0.0200739	7.01e-06	7480	T	C	-0.000175185	0.000365998	0.630001	462933
genus.RuminococcaceaeUCG010.id.11367	rs12597105	16	5233941	0.00173513	21.5756	G	A	0.0670855	0.0144415	4.87e-06	12415	G	A	9.92854e-05	0.000325388	0.760001	462933
genus.RuminococcaceaeUCG010.id.11367	rs2820282	6	104728618	0.00171698	22.1235	A	C	-0.0592304	0.0125917	2.85e-06	12865	A	C	0.000175724	0.000294003	0.55	462933
genus.RuminococcaceaeUCG010.id.11367	rs35506912	15	36607072	0.0017163	21.9909	G	C	-0.0693743	0.0147926	3.21e-06	12793	G	C	-0.00029149	0.00034793	0.4	462933
genus.RuminococcaceaeUCG010.id.11367	rs682403	9	135968557	0.00172716	22.2531	A	G	-0.0588161	0.0124671	2.37e-06	12864	A	G	-0.000399365	0.000291041	0.17	462933
genus.RuminococcaceaeUCG010.id.11367	rs6958419	7	16349864	0.00170326	21.955	C	T	-0.0585718	0.0124994	2.84e-06	12870	C	T	7.82187e-05	0.000291244	0.79	462933
genus.RuminococcaceaeUCG010.id.11367	rs73218807	4	31057482	0.00303018	20.4004	G	A	-0.166211	0.0367938	6.43e-06	6714	G	A	-0.000515202	0.000671324	0.44	462933
genus.RuminococcaceaeUCG010.id.11367	rs7441445	4	40707798	0.00157447	20.2639	C	T	-0.05695	0.0126502	6.8e-06	12852	C	T	4.98767e-05	0.000297018	0.87	462933
genus.RuminococcaceaeUCG010.id.11367	rs7935775	11	130676996	0.00162552	20.9415	A	T	-0.0631351	0.0137953	4.99e-06	12864	A	T	-0.000510259	0.000321871	0.11	462933
genus.RuminococcaceaeUCG011.id.11368	rs10274562	7	11222521	0.00563177	20.5591	C	T	0.110917	0.0244556	6.5e-06	3632	C	T	0.000260047	0.000304919	0.39	462933
genus.RuminococcaceaeUCG011.id.11368	rs12636310	3	185469491	0.00606054	22.1339	G	A	0.132725	0.0282037	2.81e-06	3632	G	A	0.000206463	0.000354931	0.56	462933
genus.RuminococcaceaeUCG011.id.11368	rs12724320	1	179370499	0.00643526	23.5113	C	T	-0.120881	0.0249229	1.52e-06	3632	C	T	-8.09821e-05	0.000313959	0.8	462933
genus.RuminococcaceaeUCG011.id.11368	rs1416041	6	105073676	0.00786121	28.7623	A	C	-0.182339	0.0339898	7.04e-08	3632	A	C	-0.000104557	0.000431891	0.81	462933
genus.RuminococcaceaeUCG011.id.11368	rs2729556	7	111763988	0.00596442	21.7808	C	T	-0.109097	0.0233699	3.19e-06	3632	C	T	0.00016976	0.000291513	0.56	462933
genus.RuminococcaceaeUCG011.id.11368	rs4490371	3	76205107	0.00555667	20.1605	T	C	-0.111816	0.0248963	7.75e-06	3610	T	C	5.89634e-05	0.000306967	0.85	462933
genus.RuminococcaceaeUCG011.id.11368	rs79113084	12	29634919	0.00632166	22.9536	C	T	-0.152166	0.0317519	2.06e-06	3610	C	T	0.000416676	0.000387704	0.28	462933
genus.RuminococcaceaeUCG011.id.11368	rs9729514	1	219901055	0.00601059	21.9504	A	G	0.184934	0.0394616	2.37e-06	3632	A	G	0.000665752	0.000501147	0.18	462933
genus.RuminococcaceaeUCG013.id.11370	rs11581881	1	9361576	0.00132501	20.8674	C	T	0.0661211	0.0144736	4.73e-06	15730	C	T	-0.000100348	0.00038703	0.8	462933
genus.RuminococcaceaeUCG013.id.11370	rs12189346	5	141395140	0.0013423	22.1347	G	A	0.0684961	0.014558	1.68e-06	16470	G	A	8.39705e-05	0.00040847	0.84	462933
genus.RuminococcaceaeUCG013.id.11370	rs12336782	9	13609119	0.00121767	20.4452	T	C	-0.0856047	0.0189311	8.6e-06	16772	T	C	0.000256161	0.000498003	0.61	462933
genus.RuminococcaceaeUCG013.id.11370	rs12485353	3	197049996	0.00128536	21.5819	G	A	-0.0607903	0.0130847	4.19e-06	16771	G	A	-7.66745e-05	0.000358793	0.83	462933
genus.RuminococcaceaeUCG013.id.11370	rs12781711	10	2219930	0.00185645	31.1906	C	T	-0.0656129	0.0117477	2.55e-08	16772	C	T	-0.000197161	0.000306109	0.52	462933
genus.RuminococcaceaeUCG013.id.11370	rs16918863	10	19780463	0.00170177	21.5488	A	C	0.111491	0.0240157	4.16e-06	12643	A	C	0.000884937	0.00060289	0.14	462933
genus.RuminococcaceaeUCG013.id.11370	rs1729063	16	10863459	0.0011833	19.5097	G	C	-0.0533411	0.0120757	9.64e-06	16470	G	C	-0.000274013	0.000317205	0.39	462933
genus.RuminococcaceaeUCG013.id.11370	rs2428106	9	136620584	0.00118825	19.9458	C	G	-0.0490863	0.0109903	8.38e-06	16768	C	G	0.00043018	0.000294834	0.14	462933
genus.RuminococcaceaeUCG013.id.11370	rs2730183	8	40311885	0.00117739	19.7681	G	A	-0.0488692	0.0109907	8.44e-06	16772	G	A	0.000295753	0.000291528	0.31	462933
genus.RuminococcaceaeUCG013.id.11370	rs4385846	10	115650278	0.00122743	20.6092	G	T	0.0598405	0.0131807	6.46e-06	16772	G	T	8.43172e-05	0.000344605	0.81	462933
genus.RuminococcaceaeUCG013.id.11370	rs75088940	12	30245557	0.00140946	22.0694	T	C	-0.0942968	0.0200712	2.55e-06	15638	T	C	-0.000432581	0.000517798	0.4	462933
genus.RuminococcaceaeUCG013.id.11370	rs76973485	3	9534657	0.00408501	21.7271	G	T	0.194976	0.0418213	3.35e-06	5299	G	T	0.000190165	0.000634629	0.760001	462933
genus.RuminococcaceaeUCG013.id.11370	rs7784330	7	32530997	0.00117771	19.7712	G	A	-0.0498329	0.0112066	8.16e-06	16770	G	A	-0.000129228	0.000298224	0.66	462933
genus.RuminococcaceaeUCG013.id.11370	rs9313055	5	3628882	0.00127275	20.0866	T	C	0.105087	0.023446	9.55e-06	15764	T	C	8.89235e-05	0.000632352	0.89	462933
genus.RuminococcaceaeUCG013.id.11370	rs9565219	13	76583319	0.00118299	19.8622	T	A	-0.0524592	0.0117701	8.73e-06	16772	T	A	0.000408755	0.000310475	0.19	462933
genus.RuminococcaceaeUCG014.id.11371	rs10495392	1	237422989	0.00139473	19.4139	C	T	-0.082486	0.0187194	9.96e-06	13902	C	T	0.000677523	0.000456223	0.14	462933
genus.RuminococcaceaeUCG014.id.11371	rs10791168	11	131659000	0.00135996	19.6115	A	G	-0.0664624	0.0150069	9.76e-06	14403	A	G	-0.000190323	0.000392417	0.630001	462933
genus.RuminococcaceaeUCG014.id.11371	rs10941294	5	36435597	0.00174374	22.0322	C	T	-0.122057	0.0260017	2.4e-06	12615	C	T	-0.000288607	0.000572851	0.61	462933
genus.RuminococcaceaeUCG014.id.11371	rs115777838	5	26110626	0.00416492	23.7222	T	C	-0.18835	0.0386643	4.62e-07	5674	T	C	-0.000200905	0.000679185	0.77	462933
genus.RuminococcaceaeUCG014.id.11371	rs12638134	3	101334609	0.00164293	23.6987	T	G	0.0582548	0.0119657	1.21e-06	14403	T	G	1.47308e-05	0.000297051	0.96	462933
genus.RuminococcaceaeUCG014.id.11371	rs17296933	19	49175964	0.0015226	20.0909	C	G	-0.0829544	0.0185058	7.34e-06	13177	C	G	-0.000623249	0.000444644	0.16	462933
genus.RuminococcaceaeUCG014.id.11371	rs34402072	8	3636548	0.00139968	19.4282	C	T	-0.0688023	0.0156083	9.8e-06	13863	C	T	-0.000242883	0.000375241	0.52	462933
genus.RuminococcaceaeUCG014.id.11371	rs439810	2	119467367	0.00143906	20.7538	G	C	-0.0577127	0.0126675	7.04e-06	14403	G	C	-0.000118088	0.000309941	0.7	462933
genus.RuminococcaceaeUCG014.id.11371	rs56105232	9	14363769	0.00235335	21.6736	G	A	0.139276	0.0299132	2.91e-06	9190	G	A	9.41864e-05	0.000617347	0.88	462933
genus.RuminococcaceaeUCG014.id.11371	rs61898819	11	126024042	0.00133784	19.1876	A	T	0.0607865	0.0138761	9.92e-06	14325	A	T	-0.000215007	0.000339308	0.53	462933
genus.RuminococcaceaeUCG014.id.11371	rs62478832	7	109564034	0.0014142	20.2928	T	A	-0.058129	0.012903	6.04e-06	14331	T	A	-0.000169327	0.000319052	0.6	462933
genus.RuminococcaceaeUCG014.id.11371	rs72809222	2	57205854	0.00165492	23.0747	T	C	0.0671775	0.0139838	2.41e-06	13922	T	C	0.000409063	0.000331556	0.22	462933
genus.RuminococcaceaeUCG014.id.11371	rs73186226	3	123829361	0.00152465	21.0081	G	A	-0.0993852	0.0216819	6.72e-06	13760	G	A	9.75539e-05	0.000533477	0.85	462933
genus.RuminococcaceaeUCG014.id.11371	rs74060145	1	15322582	0.00159155	20.7374	C	G	-0.115767	0.0254199	8.71e-06	13011	C	G	-0.000108406	0.000597008	0.86	462933
genus.RuminococcaceaeUCG014.id.11371	rs77627087	16	87759750	0.00140589	20.2565	C	G	0.067562	0.0150103	7.43e-06	14390	C	G	0.000264891	0.000373656	0.48	462933
genus.RuminococcaceaeUCG014.id.11371	rs79640386	18	4084336	0.00145623	19.9649	T	A	-0.110863	0.0248098	8.74e-06	13692	T	A	-0.000654741	0.000666871	0.33	462933
genus.RuminococcaceaeUCG014.id.11371	rs853612	10	119928413	0.00135794	19.5823	A	G	-0.0528257	0.0119367	9.75e-06	14403	A	G	-4.72831e-05	0.000296723	0.87	462933
genus.RuminococcaceaeUCG014.id.11371	rs995642	2	134854659	0.00156417	22.5593	C	T	0.060048	0.0126417	1.9e-06	14402	C	T	-9.74242e-05	0.000316452	0.760001	462933
genus.Ruminococcus1.id.11373	rs10167839	2	181882879	0.0012001	19.9492	A	G	0.0519509	0.0116306	8.09e-06	16605	A	G	-0.000154902	0.000308142	0.62	462933
genus.Ruminococcus1.id.11373	rs10769159	11	45688595	0.00203428	33.84	G	C	-0.0640277	0.0110059	5.29e-09	16603	G	C	2.13031e-05	0.000291243	0.94	462933
genus.Ruminococcus1.id.11373	rs10995816	10	65870347	0.00114513	19.0252	C	G	-0.0762002	0.0174689	8.38e-06	16597	C	G	-0.000109727	0.000491742	0.82	462933
genus.Ruminococcus1.id.11373	rs11783695	8	144596903	0.0012443	20.6861	G	T	-0.0734114	0.0161398	4.73e-06	16606	G	T	0.000157529	0.000426802	0.709999	462933
genus.Ruminococcus1.id.11373	rs17781867	17	71256018	0.00154994	22.2715	C	T	0.0999271	0.0211728	1.96e-06	14349	C	T	0.000112459	0.000521236	0.83	462933
genus.Ruminococcus1.id.11373	rs3000856	1	12778598	0.00117855	19.0253	T	A	-0.0709997	0.0162766	9.28e-06	16126	T	A	0.000374094	0.000453399	0.41	462933
genus.Ruminococcus1.id.11373	rs3819978	1	241789757	0.00152922	19.5535	C	T	-0.11504	0.0260137	8.74e-06	12769	C	T	0.000699212	0.000643099	0.28	462933
genus.Ruminococcus1.id.11373	rs4849717	2	119481372	0.00186686	19.605	T	A	0.132764	0.0299816	8.83e-06	10484	T	A	0.00156524	0.000700536	0.025	462933
genus.Ruminococcus1.id.11373	rs6105066	20	13258628	0.0012724	20.4442	T	C	-0.0607052	0.013425	5.06e-06	16049	T	C	1.37575e-05	0.000349596	0.97	462933
genus.Ruminococcus1.id.11373	rs6493760	15	55439182	0.00132124	21.3318	C	T	0.0535262	0.0115885	3.38e-06	16126	C	T	-0.000632512	0.000300395	0.0350002	462933
genus.Ruminococcus1.id.11373	rs7117576	11	114023573	0.00141683	23.5584	A	G	0.0829505	0.0170891	6.48e-07	16606	A	G	1.58749e-05	0.000447788	0.97	462933
genus.Ruminococcus1.id.11373	rs7583465	2	10533921	0.00132162	21.9495	C	T	0.0527654	0.0112619	2.56e-06	16588	C	T	0.000390121	0.000296808	0.19	462933
genus.Ruminococcus1.id.11373	rs78572139	5	15944587	0.00171352	20.0226	G	A	0.125038	0.0279411	5.23e-06	11667	G	A	0.000503582	0.000614261	0.41	462933
genus.Ruminococcus1.id.11373	rs78613526	2	65925212	0.00284862	20.7515	G	A	0.167497	0.0367639	5.11e-06	7266	G	A	-0.00116565	0.000635607	0.0669993	462933
genus.Ruminococcus2.id.11374	rs12406309	1	108074445	0.00128447	19.7252	A	C	-0.063193	0.0142275	9.79e-06	15339	A	C	4.61476e-05	0.000365626	0.9	462933
genus.Ruminococcus2.id.11374	rs12986628	2	238103439	0.00153169	22.5688	C	T	0.0665937	0.0140168	2.14e-06	14714	C	T	0.00111235	0.000347437	0.00140001	462933
genus.Ruminococcus2.id.11374	rs1819812	7	151435722	0.00139409	20.7535	G	T	0.0842356	0.0184893	5.28e-06	14868	G	T	0.000453057	0.000460469	0.33	462933
genus.Ruminococcus2.id.11374	rs2846589	18	862477	0.00134666	20.1219	G	T	0.0522093	0.0116382	7.59e-06	14924	G	T	0.000254282	0.000294615	0.39	462933
genus.Ruminococcus2.id.11374	rs2997412	13	62067781	0.0014061	21.5915	A	G	-0.0568439	0.0122325	4.22e-06	15336	A	G	-0.000162552	0.000309465	0.6	462933
genus.Ruminococcus2.id.11374	rs4400279	7	16804578	0.0013472	20.6817	A	G	0.0546114	0.0120077	5.8e-06	15333	A	G	0.000106674	0.000302781	0.719999	462933
genus.Ruminococcus2.id.11374	rs4799823	18	33456427	0.00143746	21.0862	C	T	0.0837001	0.0182263	5.4e-06	14650	C	T	0.000805565	0.000474144	0.089	462933
genus.Ruminococcus2.id.11374	rs55707116	9	79919385	0.00136358	20.9377	C	A	0.0865521	0.0189141	8.01e-06	15336	C	A	0.000488804	0.000485623	0.31	462933
genus.Ruminococcus2.id.11374	rs58681734	9	137557890	0.00131972	20.266	A	G	0.0723875	0.0160787	4.18e-06	15338	A	G	0.00059694	0.00041885	0.15	462933
genus.Ruminococcus2.id.11374	rs61791565	4	24655463	0.00130253	19.9769	T	C	-0.0523503	0.0117119	6.79e-06	15319	T	C	0.0002531	0.000296567	0.39	462933
genus.Ruminococcus2.id.11374	rs75140805	11	12148588	0.00157609	22.49	T	G	0.0836825	0.0176445	3.95e-06	14249	T	G	-8.93297e-05	0.000442801	0.84	462933
genus.Ruminococcus2.id.11374	rs7635831	3	173040924	0.00153645	22.9622	G	A	0.0618344	0.0129031	1.98e-06	14924	G	A	-0.000292521	0.000330539	0.38	462933
genus.Ruminococcus2.id.11374	rs7693984	4	4268322	0.00134974	19.1273	G	A	-0.102822	0.0235087	9.42e-06	14154	G	A	5.79874e-05	0.000599657	0.92	462933
genus.Ruminococcus2.id.11374	rs78120384	3	106664363	0.00396134	24.1807	A	G	-0.192815	0.0392045	3.31e-07	6082	A	G	-7.07332e-05	0.000679874	0.92	462933
genus.Sellimonas.id.14369	rs113379006	3	42008186	0.00654603	20.769	T	C	-0.162759	0.0357025	7.21e-06	3154	T	C	-0.000449239	0.000413996	0.28	462933
genus.Sellimonas.id.14369	rs13417181	2	174308394	0.00792405	24.3214	T	C	0.166509	0.0337521	7.62e-07	3047	T	C	-0.000313224	0.000421974	0.46	462933
genus.Sellimonas.id.14369	rs2016057	15	52105282	0.00759841	24.1336	A	C	-0.125878	0.0256153	1.03e-06	3154	A	C	-0.000180217	0.000298815	0.55	462933
genus.Sellimonas.id.14369	rs2187447	11	79332972	0.0069804	21.2712	A	C	0.243457	0.0527695	3.98e-06	3028	A	C	0.00100461	0.000580062	0.0830004	462933
genus.Sellimonas.id.14369	rs2371572	2	213214174	0.00810446	25.754	A	C	0.127349	0.0250862	4.46e-07	3154	A	C	-0.000390029	0.000292552	0.18	462933
genus.Sellimonas.id.14369	rs41816	7	106250164	0.00649729	20.6134	A	G	0.132201	0.0291087	8.39e-06	3154	A	G	-2.80511e-05	0.00033683	0.93	462933
genus.Sellimonas.id.14369	rs4600608	2	180278564	0.00663279	20.6522	A	G	-0.137152	0.0301702	4.95e-06	3095	A	G	6.23588e-05	0.000348556	0.86	462933
genus.Sellimonas.id.14369	rs553697	6	93730393	0.00670319	20.549	T	C	-0.153767	0.0339099	6.13e-06	3047	T	C	0.000187922	0.000391519	0.630001	462933
genus.Sellimonas.id.14369	rs56203279	7	111501524	0.00669122	21.2328	T	C	-0.124045	0.0269115	3.72e-06	3154	T	C	0.000103159	0.000312314	0.74	462933
genus.Sellimonas.id.14369	rs72553859	1	247579710	0.00644537	20.4476	G	C	-0.150458	0.0332626	5.38e-06	3154	G	C	0.000537884	0.000391235	0.17	462933
genus.Sellimonas.id.14369	rs7968030	12	100709313	0.0065857	20.5046	A	T	-0.12711	0.0280617	5.56e-06	3095	A	T	-4.03653e-05	0.000325134	0.9	462933
genus.Senegalimassilia.id.11160	rs10036909	5	127861692	0.00426842	21.4079	C	T	0.185519	0.0400881	8.05e-06	4996	C	T	-0.000101331	0.000576784	0.86	462933
genus.Senegalimassilia.id.11160	rs11787826	9	34332382	0.00325077	22.572	C	A	0.081327	0.0171154	2.63e-06	6923	C	A	-0.000337755	0.000291711	0.25	462933
genus.Senegalimassilia.id.11160	rs13383270	2	220831701	0.00296129	20.5559	G	C	0.0774679	0.017084	6.04e-06	6923	G	C	-0.000151787	0.000294541	0.61	462933
genus.Senegalimassilia.id.11160	rs1990708	2	206654123	0.00281906	19.5659	A	C	-0.109619	0.0247785	8.91e-06	6923	A	C	8.13966e-05	0.000423626	0.85	462933
genus.Senegalimassilia.id.11160	rs2017373	14	34431996	0.00281848	19.5618	C	T	0.0782258	0.0176841	9.5e-06	6923	C	T	-0.000488416	0.000301374	0.11	462933
genus.Senegalimassilia.id.11160	rs57512504	13	19489214	0.00325917	22.6305	T	A	0.0819494	0.0172241	2.03e-06	6923	T	A	0.000357481	0.000293762	0.22	462933
genus.Senegalimassilia.id.11160	rs7225245	17	48379615	0.00310786	21.5766	G	A	0.079173	0.0170421	4.18e-06	6923	G	A	-0.000320154	0.000304756	0.29	462933
genus.Senegalimassilia.id.11160	rs72887800	17	74949284	0.00315442	21.9008	T	A	-0.0822462	0.0175721	2.42e-06	6923	T	A	0.000160629	0.000300288	0.59	462933
genus.Streptococcus.id.1853	rs10028567	4	53657577	0.00141097	23.044	C	T	-0.0921167	0.0191881	7.3e-06	16311	C	T	0.000590717	0.000504042	0.24	462933
genus.Streptococcus.id.1853	rs10448310	9	93556174	0.00131942	21.6433	A	G	-0.0517935	0.0111324	3.31e-06	16384	A	G	0.000184826	0.000293086	0.53	462933
genus.Streptococcus.id.1853	rs11110281	12	100584014	0.00241296	36.5673	T	C	-0.137519	0.0227398	2.58e-09	15120	T	C	-0.00119258	0.000598728	0.0460002	462933
genus.Streptococcus.id.1853	rs11720390	3	94103591	0.00144407	22.0076	G	A	0.107024	0.0228121	3.59e-06	15220	G	A	-0.00042238	0.000545133	0.44	462933
genus.Streptococcus.id.1853	rs11764382	7	46774896	0.00142738	23.4211	A	G	-0.0695345	0.0143671	1.29e-06	16387	A	G	-0.000100217	0.000377234	0.79	462933
genus.Streptococcus.id.1853	rs17708276	8	10199548	0.00132836	21.6491	A	G	-0.0793955	0.0170628	3.04e-06	16278	A	G	-0.00112681	0.000425849	0.00809991	462933
genus.Streptococcus.id.1853	rs1918540	11	131649446	0.0013211	21.6563	G	A	0.059639	0.0128148	2.44e-06	16373	G	A	-0.000206174	0.000337277	0.54	462933
genus.Streptococcus.id.1853	rs2370083	14	97526750	0.00118536	19.3146	G	T	-0.0816836	0.0185851	9.75e-06	16277	G	T	-0.000699393	0.000478429	0.14	462933
genus.Streptococcus.id.1853	rs395407	5	169689604	0.00131141	20.8288	G	C	-0.0792781	0.0173697	4.37e-06	15864	G	C	-4.74302e-05	0.000409028	0.91	462933
genus.Streptococcus.id.1853	rs4968759	17	61298020	0.00128781	21.1242	A	G	-0.0515109	0.0112068	3.78e-06	16384	A	G	-0.000509158	0.000293705	0.0830004	462933
genus.Streptococcus.id.1853	rs57646748	4	37452858	0.00128619	20.5245	G	A	-0.0907696	0.0200344	5.48e-06	15939	G	A	0.000410268	0.000567746	0.47	462933
genus.Streptococcus.id.1853	rs6563952	16	73391982	0.00128706	21.1156	G	C	0.0827344	0.0180035	5.82e-06	16387	G	C	-8.14745e-05	0.00051028	0.87	462933
[truncated: 590 more rows]
