# Supplementary material for: Gut microbiota and venous thromboembolism: a two-sample Mendelian randomization study Gut microbiota and venous thromboembolism
Source: Research Square preprint supplement (doi:10.21203/rs.3.rs-3834627/v1), 2024-01-08
Supplement: Supplementary file 3 [file 5ce15fc6791a9186324ecc82.xlsx]

## Sheet: Sheet1
Table S6 Effect estimates of the associations of VTE, DVT, and PE with 15 bacterial traits in the MR PRESSO analysis after excluding pleiotropic SNPs.
Gut microbiota(exposure)	ID.outcome	Outcome	Outlier test	Causal Estimate	Sd	P-value	OR	Low95% CI	High95% CI
family.Porphyromonadaceae.id.943	finn-b-I9_VTE	VTE	MR-PRESSO	0.316926	0.0840989	0.00547747	1.3729	1.16427	1.61892
phylum.Cyanobacteria.id.1500	finn-b-I9_VTE	VTE	MR-PRESSO	0.194858	0.0521778	0.00731535	1.21514	1.09701	1.34599
family.Defluviitaleaceae.id.1924	ukb-b-12040	DVT	MR-PRESSO	-0.00220029	0.000940751	0.0414195	0.997802	0.995964	0.999644
family.Oxalobacteraceae.id.2966	ukb-b-12040	DVT	MR-PRESSO	-0.00224311	0.000989163	0.0410439	0.997759	0.995827	0.999696
family.Ruminococcaceae.id.2050	ukb-b-12040	DVT	MR-PRESSO	-0.00438665	0.00171581	0.0285387	0.995623	0.99228	0.998977
genus..Eubacteriumrectalegroup.id.14374	ukb-b-12040	DVT	MR-PRESSO	0.00379045	0.0011387	0.0088164	1.0038	1.00156	1.00604
genus.Erysipelatoclostridium.id.11381	ukb-b-12040	DVT	MR-PRESSO	-0.00296401	0.00116522	0.0234001	0.99704	0.994766	0.99932
genus.LachnospiraceaeUCG001.id.11321	ukb-b-12040	DVT	MR-PRESSO	0.00405783	0.00121839	0.00495259	1.00407	1.00167	1.00647
genus.Slackia.id.825	ukb-b-12040	DVT	MR-PRESSO	-0.00264862	0.000904034	0.0190044	0.997355	0.995589	0.999124
family.Alcaligenaceae.id.2875	ukb-b-18366	PE	MR-PRESSO	0.00169218	0.000946167	0.107332	1.00169	0.999838	1.00355
family.Christensenellaceae.id.1866	ukb-b-18366	PE	MR-PRESSO	0.0023317	0.00118803	0.106922	1.00233	1	1.00467
family.Streptococcaceae.id.1850	ukb-b-18366	PE	MR-PRESSO	/	/	/	/	/	/
family.Victivallaceae.id.2255	ukb-b-18366	PE	MR-PRESSO	0.00140536	0.000714977	0.120778	1.00141	1	1.00281
genus..Eubacteriumhalliigroup.id.11338	ukb-b-18366	PE	MR-PRESSO	-0.00193542	0.000774032	0.0667351	0.998066	0.996553	0.999582
genus.Anaerotruncus.id.2054	ukb-b-18366	PE	MR-PRESSO	-0.00210561	0.000777924	0.0267945	0.997897	0.996376	0.999419
