# Supplementary material for: Gut microbiota and venous thromboembolism: a two-sample Mendelian randomization study Gut microbiota and venous thromboembolism
Source: Research Square preprint supplement (doi:10.21203/rs.3.rs-3834627/v1), 2024-01-08
Supplement: Supplementary file 4 [file 77707bd8318777d0afd9d566.xlsx]

## Sheet: Sheet1
Table S1 Instrumental variables (IVs) used in MR analysis of the association between 196 bacterial traits and VTE among European populations.
						Gut microbiota						Venous thromboembolism(VTE)
Gut microbiota	SNP	Chr	Pos	R2	F	Effect allele	Other allele	beta	se	P-value	Samplesize	Effect allele	Other allele	beta	se	P-value	Samplesize
class.Actinobacteria.id.419	rs10841473	12	20378911	0.00137119	22.3934	G	C	-0.0583765	0.0123353	2.59e-06	16311	G	C	-0.0144	0.0188	0.4442	218792
class.Actinobacteria.id.419	rs11655079	17	75348675	0.00124627	20.3482	T	C	-0.0560674	0.0124286	5.93e-06	16309	T	C	0.0201	0.0203	0.3232	218792
class.Actinobacteria.id.419	rs11745923	5	475408	0.00145768	23.8095	G	T	0.0563759	0.0115529	1.58e-06	16312	G	T	-0.0079	0.0163	0.6275	218792
class.Actinobacteria.id.419	rs12049045	1	114665485	0.00122072	19.9331	A	G	0.0510452	0.0114325	8.63e-06	16311	A	G	0.0248	0.0163	0.1275	218792
class.Actinobacteria.id.419	rs12899991	15	49208992	0.0013372	21.6649	A	T	0.0719923	0.0154661	4.03e-06	16182	A	T	-0.014	0.0187	0.455	218792
class.Actinobacteria.id.419	rs134366	22	35567355	0.00158206	22.6593	G	A	0.111877	0.023501	1.5e-06	14302	G	A	0.0352	0.0314	0.2618	218792
class.Actinobacteria.id.419	rs1376754	2	161611969	0.00126456	20.4864	G	A	0.0509242	0.0112503	6.71e-06	16182	G	A	0.0268	0.0159	0.0912998	218792
class.Actinobacteria.id.419	rs1515761	10	126110032	0.0012953	20.1331	T	C	0.0762317	0.0169884	4.96e-06	15525	T	C	0.0097	0.0303	0.747699	218792
class.Actinobacteria.id.419	rs182549	2	136616754	0.00520644	85.3667	C	T	0.111489	0.012066	3.79e-20	16313	C	T	-0.0313	0.0162	0.0535599	218792
class.Actinobacteria.id.419	rs4945008	11	71221248	0.00121486	19.8397	A	G	0.0540741	0.0121393	5.39e-06	16313	A	G	0.0175	0.0163	0.282	218792
class.Actinobacteria.id.419	rs6660520	1	207003553	0.00171304	27.9808	A	G	0.0711483	0.0134495	1.11e-07	16308	A	G	0.0037	0.0178	0.8337	218792
class.Actinobacteria.id.419	rs72767435	15	94852795	0.00165048	21.3198	T	C	-0.126352	0.0273626	2.57e-06	12898	T	C	0.0623	0.035	0.0753807	218792
class.Actinobacteria.id.419	rs7322849	13	112859829	0.00146621	23.9504	T	C	0.0944467	0.0192976	6.21e-07	16313	T	C	-0.0523	0.0278	0.0595402	218792
class.Actinobacteria.id.419	rs7700479	5	18019549	0.00119887	19.5783	T	A	-0.0769653	0.0173933	8.62e-06	16313	T	A	0.0139	0.026	0.5925	218792
class.Actinobacteria.id.419	rs80083040	8	65654844	0.0024975	20.0325	T	G	0.155784	0.0348017	8.62e-06	8003	T	G	-0.0364	0.0388	0.3474	218792
class.Actinobacteria.id.419	rs8047955	16	81777525	0.00148925	24.317	A	G	0.0575816	0.0116762	8.34e-07	16306	A	G	0.0082	0.0168	0.6271	218792
class.Actinobacteria.id.419	rs857444	6	14617591	0.00119402	19.4978	C	T	0.0509553	0.011539	8.92e-06	16312	C	T	0.0121	0.0165	0.463	218792
class.Actinobacteria.id.419	rs961091	7	95654718	0.00121456	19.8324	G	A	0.0501255	0.011255	8.68e-06	16311	G	A	-0.0144	0.0165	0.3829	218792
class.Alphaproteobacteria.id.2379	rs10803434	1	14238305	0.00237008	21.6499	A	T	-0.0692742	0.0148866	3.55e-06	9115	A	T	0.0067	0.0159	0.6718	218792
class.Alphaproteobacteria.id.2379	rs12977163	19	28641647	0.00220395	20.1289	G	C	0.0690234	0.0153829	7.14e-06	9115	G	C	-0.0187	0.0163	0.2521	218792
class.Alphaproteobacteria.id.2379	rs140912403	9	95517807	0.00299303	25.5712	C	T	-0.160677	0.0317708	6.2e-07	8520	C	T	-0.0279	0.0339	0.4114	218792
class.Alphaproteobacteria.id.2379	rs17061716	3	59982336	0.00210435	19.9555	G	C	0.0927341	0.0207569	9.33e-06	9465	G	C	-0.033	0.0218	0.1291	218792
class.Alphaproteobacteria.id.2379	rs34569731	2	75630344	0.00219247	20.0239	A	G	0.0705145	0.0157564	7.38e-06	9115	A	G	0.0091	0.0165	0.580399	218792
class.Alphaproteobacteria.id.2379	rs55876211	3	84471266	0.00200405	19.2514	C	T	-0.080811	0.0184159	7.54e-06	9589	C	T	0.0297	0.0182	0.1027	218792
class.Alphaproteobacteria.id.2379	rs62285697	3	176407911	0.00216888	19.8079	C	T	0.0805256	0.0180912	9.76e-06	9115	C	T	-0.024	0.0184	0.1931	218792
class.Alphaproteobacteria.id.2379	rs76784716	2	169033340	0.0025762	24.7722	A	G	0.133271	0.0267738	5.09e-07	9593	A	G	-0.0006	0.025	0.9818	218792
class.Alphaproteobacteria.id.2379	rs7960664	12	89471235	0.00211155	20.301	G	A	0.0969489	0.0215149	8.84e-06	9596	G	A	-0.0174	0.0283	0.5382	218792
class.Alphaproteobacteria.id.2379	rs9813022	3	13726736	0.00247902	23.8353	A	G	-0.0751277	0.0153867	1.05e-06	9593	A	G	0.014	0.0164	0.3922	218792
class.Bacilli.id.1673	rs11110282	12	100585559	0.00135028	21.6661	A	G	-0.101189	0.0217379	4.85e-06	16026	A	G	-0.0125	0.0368	0.7331	218792
class.Bacilli.id.1673	rs111552159	4	184681021	0.00175127	19.9083	C	G	0.128032	0.0286921	9.13e-06	11350	C	G	-0.0232	0.0388	0.550201	218792
class.Bacilli.id.1673	rs11730038	4	98049499	0.00137994	24.0097	G	A	-0.0630747	0.0128717	1.96e-06	17377	G	A	0.0101	0.0175	0.562101	218792
class.Bacilli.id.1673	rs12797734	11	8332350	0.00120332	20.3606	T	C	0.0572158	0.0126793	7.21e-06	16902	T	C	-0.0003	0.0184	0.9867	218792
class.Bacilli.id.1673	rs13068444	3	64398863	0.00112355	19.4121	A	G	0.0601035	0.0136407	9.53e-06	17260	A	G	-0.0046	0.0208	0.8237	218792
class.Bacilli.id.1673	rs1595463	2	231723657	0.00111063	19.2975	C	A	0.0476864	0.0108547	7.97e-06	17358	C	A	-0.0216	0.016	0.1768	218792
class.Bacilli.id.1673	rs1962325	3	4800550	0.0013413	23.3083	C	G	0.0554219	0.0114789	1.38e-06	17356	C	G	0.0019	0.0168	0.9096	218792
class.Bacilli.id.1673	rs28564647	9	101101172	0.00114188	19.8525	T	G	-0.0613034	0.0137579	7.81e-06	17368	T	G	-0.0195	0.0213	0.3593	218792
class.Bacilli.id.1673	rs2952251	8	10143164	0.0013439	23.3588	A	G	-0.0598868	0.0123903	1.08e-06	17360	A	G	-0.0162	0.0206	0.4309	218792
class.Bacilli.id.1673	rs34989881	19	51959855	0.00156887	20.3708	A	G	0.111056	0.0246039	6.55e-06	12966	A	G	-0.0272	0.0376	0.4696	218792
class.Bacilli.id.1673	rs35344081	16	991253	0.00136637	23.769	G	A	0.0619529	0.0127066	1.01e-06	17374	G	A	0.0027	0.018	0.8818	218792
class.Bacilli.id.1673	rs4028634	17	40835649	0.00129111	22.462	T	C	0.0520614	0.0109842	2.21e-06	17377	T	C	-0.003	0.0164	0.8532	218792
class.Bacilli.id.1673	rs4459992	4	7431487	0.00121995	21.2042	T	C	0.0535854	0.0116362	4.3e-06	17362	T	C	0.0028	0.0169	0.8689	218792
class.Bacilli.id.1673	rs57872228	1	200418805	0.00136544	23.7542	C	T	-0.0714773	0.0146647	9.22e-07	17375	C	T	0.0273	0.0247	0.2694	218792
class.Bacilli.id.1673	rs694949	15	58738075	0.00122221	20.3111	A	G	-0.081146	0.0180042	7.6e-06	16600	A	G	0.0105	0.0269	0.6971	218792
class.Bacilli.id.1673	rs74352383	6	67570929	0.00140072	23.1682	T	A	-0.104496	0.0217083	1.53e-06	16519	T	A	0.0021	0.0288	0.9414	218792
class.Bacilli.id.1673	rs74663707	3	184371224	0.00120946	19.0926	C	T	0.0979154	0.0224074	8.46e-06	15769	C	T	-0.0064	0.0324	0.8441	218792
class.Bacilli.id.1673	rs7666190	4	151687420	0.0016846	17.6068	C	A	-0.104044	0.0247934	8.47e-06	10436	C	A	-0.0405	0.0248	0.103	218792
class.Bacilli.id.1673	rs76717940	3	94153993	0.00286119	22.9982	T	A	0.156331	0.0325945	1.07e-06	8017	T	A	0.004	0.0347	0.9083	218792
class.Bacilli.id.1673	rs77558518	5	174173171	0.00146021	23.1548	A	G	-0.107255	0.0222879	1.34e-06	15836	A	G	-0.0231	0.0271	0.3941	218792
class.Bacilli.id.1673	rs78938557	7	36349586	0.001411	21.5113	T	C	0.108007	0.0232858	1.07e-06	15226	T	C	0.0197	0.0473	0.676799	218792
class.Bacilli.id.1673	rs9581006	13	24973509	0.00542712	23.1966	C	T	0.225309	0.0467697	1.79e-06	4253	C	T	0.0177	0.0421	0.6745	218792
class.Bacteroidia.id.912	rs11146701	10	39062269	0.00110668	20.1839	A	G	0.0473596	0.010541	7.08e-06	18220	A	G	-0.0052	0.0211	0.8065	218792
class.Bacteroidia.id.912	rs13291169	9	116888284	0.00122573	21.4901	C	G	0.0689676	0.0148765	3.75e-06	17513	C	G	-0.0473	0.0229	0.0386999	218792
class.Bacteroidia.id.912	rs17343978	22	27433885	0.00114773	21.0645	A	C	-0.0552057	0.0120278	8.36e-06	18334	A	C	-0.0071	0.0196	0.7157	218792
class.Bacteroidia.id.912	rs2032750	2	53831026	0.00126746	22.6542	T	C	-0.0508393	0.0106807	1.92e-06	17853	T	C	-0.0096	0.016	0.5466	218792
class.Bacteroidia.id.912	rs4146051	2	213189994	0.00167719	19.1017	A	G	-0.107377	0.0245661	8.76e-06	11372	A	G	0.0319	0.0294	0.2773	218792
class.Bacteroidia.id.912	rs4916508	3	195936789	0.00107074	19.6392	G	A	-0.0466729	0.0105312	8.47e-06	18324	G	A	-0.0077	0.016	0.6297	218792
class.Bacteroidia.id.912	rs55773148	13	70523029	0.00231565	26.3366	G	A	-0.121514	0.0236759	3.9e-07	11349	G	A	-0.016	0.0352	0.6496	218792
class.Bacteroidia.id.912	rs62531359	8	70916181	0.00104357	19.136	T	G	0.0655728	0.0149891	9.09e-06	18320	T	G	0.0226	0.0207	0.2728	218792
class.Bacteroidia.id.912	rs62575403	9	136493820	0.00209157	20.2595	C	T	0.140055	0.0311128	7.06e-06	9668	C	T	-0.0871	0.0403	0.0306803	218792
class.Bacteroidia.id.912	rs72706335	1	157495438	0.00529119	20.3039	T	C	-0.22241	0.0493458	7.66e-06	3819	T	C	0.0391	0.0504	0.4377	218792
class.Bacteroidia.id.912	rs73975615	17	6461200	0.00648718	21.8609	G	A	-0.207018	0.0442633	1.22e-06	3350	G	A	-0.0934	0.0931	0.316	218792
class.Bacteroidia.id.912	rs7546249	1	176792690	0.00125015	22.9452	T	A	-0.0567113	0.0118386	1.55e-06	18333	T	A	-0.0213	0.0174	0.2201	218792
class.Bacteroidia.id.912	rs7631304	3	89339527	0.00128504	23.5876	G	A	-0.0645771	0.0132957	8.37e-07	18334	G	A	0.0027	0.0222	0.9033	218792
class.Bacteroidia.id.912	rs79585701	8	13110185	0.00101823	18.6851	A	C	0.0646823	0.0149628	9.99e-06	18334	A	C	0.005	0.0228	0.8252	218792
class.Bacteroidia.id.912	rs929878	16	74290641	0.00110994	20.3701	C	T	-0.0548532	0.012153	4.73e-06	18334	C	T	0.015	0.0193	0.4373	218792
class.Betaproteobacteria.id.2867	rs11128180	3	70592215	0.00123475	21.2008	A	G	0.0592944	0.0128769	3.67e-06	17151	A	G	-0.0355	0.0187	0.0576806	218792
class.Betaproteobacteria.id.2867	rs12467854	2	239888758	0.0013886	23.6891	G	C	0.0641363	0.0131766	1.1e-06	17038	G	C	0.0103	0.0195	0.5972	218792
class.Betaproteobacteria.id.2867	rs1511453	4	23588462	0.00125692	21.499	A	G	0.0923492	0.0199158	4.76e-06	17085	A	G	0.0265	0.0339	0.4351	218792
class.Betaproteobacteria.id.2867	rs1928341	1	153240013	0.0013196	22.6584	A	G	0.0525581	0.0110408	2.02e-06	17150	A	G	0.0357	0.0161	0.0267602	218792
class.Betaproteobacteria.id.2867	rs2321387	13	58689340	0.00118993	20.428	G	A	-0.0494596	0.0109424	5.8e-06	17149	G	A	-0.016	0.016	0.318	218792
class.Betaproteobacteria.id.2867	rs2367850	3	193456274	0.0014397	24.0993	G	C	0.064006	0.0130374	9.12e-07	16717	G	C	-0.0356	0.0195	0.0671707	218792
class.Betaproteobacteria.id.2867	rs2613606	7	111285025	0.00128859	22.12	C	T	-0.0513106	0.0109091	2.2e-06	17146	C	T	0.0005	0.016	0.9745	218792
class.Betaproteobacteria.id.2867	rs320161	9	104899117	0.00120571	20.5617	A	G	0.0572286	0.01262	7.33e-06	17035	A	G	-0.0116	0.0189	0.5385	218792
class.Betaproteobacteria.id.2867	rs4033856	4	45642485	0.00155141	24.7725	C	T	0.0832423	0.0167237	5.17e-07	15945	C	T	-0.0279	0.0282	0.3227	218792
class.Betaproteobacteria.id.2867	rs56386628	8	112735565	0.00122499	21.0281	C	T	-0.0622252	0.0135688	5.87e-06	17147	C	T	-0.0165	0.0182	0.3637	218792
class.Betaproteobacteria.id.2867	rs6087811	20	30596130	0.00149789	24.2753	T	G	-0.0978177	0.0198522	7.44e-07	16184	T	G	0.0031	0.0264	0.905	218792
class.Betaproteobacteria.id.2867	rs62395635	5	173497796	0.00142917	21.62	T	C	0.109741	0.0236	2.94e-06	15108	T	C	-0.0318	0.0331	0.3368	218792
class.Betaproteobacteria.id.2867	rs72747231	9	84206018	0.00196694	22.353	C	G	-0.137281	0.0290338	2.06e-06	11344	C	G	0.0431	0.0377	0.2529	218792
class.Betaproteobacteria.id.2867	rs75242906	15	56786407	0.00171885	18.5972	C	T	-0.121083	0.028075	9.27e-06	10803	C	T	0.0162	0.0289	0.5754	218792
class.Clostridia.id.1859	rs10209007	2	231676041	0.00106286	18.9497	G	C	0.0794173	0.0182427	9.89e-06	17812	G	C	0.0289	0.0354	0.4145	218792
class.Clostridia.id.1859	rs10774377	12	5942519	0.00116559	21.3879	A	G	0.052659	0.0113858	3.24e-06	18330	A	G	0.019	0.016	0.2347	218792
class.Clostridia.id.1859	rs112334273	21	40703251	0.00138766	25.3114	G	A	0.0641008	0.0127404	3.81e-07	18217	G	A	-0.0114	0.0177	0.5215	218792
class.Clostridia.id.1859	rs13105690	4	7420184	0.00109172	20.0418	T	C	-0.0529097	0.011818	8.78e-06	18340	T	C	0.0128	0.0177	0.4686	218792
class.Clostridia.id.1859	rs13179700	5	149077788	0.00118903	21.8279	T	C	0.0511937	0.0109569	3.37e-06	18338	T	C	0.0065	0.0167	0.696	218792
class.Clostridia.id.1859	rs13421739	2	116724915	0.00133178	24.4547	C	G	0.0888472	0.0179655	9.54e-06	18340	C	G	0.0189	0.0313	0.545301	218792
class.Clostridia.id.1859	rs1842454	5	105060362	0.00100587	18.4642	G	A	-0.0547202	0.0127338	8.72e-06	18340	G	A	0.0045	0.0204	0.8255	218792
class.Clostridia.id.1859	rs2273429	14	52494072	0.00121811	22.3612	A	G	-0.0724037	0.0153105	4.52e-06	18337	A	G	0.0056	0.0259	0.8286	218792
class.Clostridia.id.1859	rs6797343	3	89268714	0.00105533	19.373	G	T	0.0592279	0.0134556	9.36e-06	18340	G	T	-0.0415	0.0201	0.03904	218792
class.Clostridia.id.1859	rs6814436	4	161507301	0.00131127	24.0724	T	C	0.0739995	0.0150815	9.65e-07	18336	T	C	-0.0239	0.0228	0.2944	218792
class.Clostridia.id.1859	rs6815608	4	152131744	0.00144607	24.2263	T	C	0.103803	0.0210883	4.02e-07	16731	T	C	-0.0248	0.0221	0.2616	218792
class.Clostridia.id.1859	rs6934062	6	163743050	0.00114078	20.3942	G	C	0.0524406	0.0116115	6.53e-06	17859	G	C	0.0203	0.017	0.233	218792
class.Clostridia.id.1859	rs7269302	20	50803760	0.00118645	20.6722	A	T	-0.0963981	0.0212007	9.04e-06	17405	A	T	0.0493	0.0334	0.1392	218792
class.Clostridia.id.1859	rs72738886	5	35770550	0.00122072	20.6945	T	C	0.086617	0.0190393	8.24e-06	16934	T	C	0.0138	0.0299	0.644	218792
class.Clostridia.id.1859	rs72915163	18	48792829	0.00126648	23.2249	T	C	-0.0581025	0.0120557	1.34e-06	18317	C	G	0.1394	0.4286	0.745	218792
class.Clostridia.id.1859	rs72915163	18	48792829	0.00126648	23.2249	T	C	-0.0581025	0.0120557	1.34e-06	18317	T	C	0.0062	0.0194	0.747599	218792
class.Clostridia.id.1859	rs76860606	6	12397187	0.00100574	17.6957	C	G	0.0947036	0.0225117	7.53e-06	17579	C	G	0.0728	0.0282	0.00988804	218792
class.Coriobacteriia.id.809	rs11250875	10	1922731	0.00121534	21.5232	T	C	0.06075	0.0130939	4.83e-06	17690	T	C	-0.0034	0.0193	0.8593	218792
class.Coriobacteriia.id.809	rs11656361	17	8121332	0.0011624	19.3915	A	C	0.0773006	0.017553	8.02e-06	16665	A	C	-0.0298	0.0206	0.1479	218792
class.Coriobacteriia.id.809	rs12974142	19	52895166	0.00113949	19.8623	G	A	0.0789796	0.0177205	8.51e-06	17413	G	A	0.0067	0.0311	0.8302	218792
class.Coriobacteriia.id.809	rs13307134	7	105084680	0.00114388	20.0695	C	T	0.0565686	0.0126265	7.8e-06	17527	C	T	-0.0425	0.0213	0.0464205	218792
class.Coriobacteriia.id.809	rs1397793	5	90471451	0.00112166	19.6792	G	A	-0.0498855	0.0112446	9.77e-06	17527	G	A	0.0021	0.0174	0.9043	218792
class.Coriobacteriia.id.809	rs1816223	12	11494021	0.00116623	20.65	A	G	-0.0586265	0.0129006	4.84e-06	17688	A	G	-0.0133	0.0198	0.5031	218792
class.Coriobacteriia.id.809	rs240104	1	176571431	0.0012858	22.6271	T	C	-0.0603429	0.0126849	1.52e-06	17577	T	C	-0.0116	0.0177	0.5129	218792
class.Coriobacteriia.id.809	rs2442778	3	11654412	0.00150249	20.2689	G	A	-0.116408	0.0258545	9.03e-06	13472	G	A	0.01	0.036	0.7812	218792
class.Coriobacteriia.id.809	rs3025411	9	136512906	0.00124698	19.5632	A	G	0.0926543	0.0209468	8.27e-06	15671	A	G	0.0642	0.026	0.0133801	218792
class.Coriobacteriia.id.809	rs34739816	17	37376685	0.00129972	21.5917	G	T	0.0965017	0.0207666	3.88e-06	16593	G	T	-0.0364	0.034	0.2834	218792
class.Coriobacteriia.id.809	rs62448869	7	24464799	0.00113362	19.8892	T	A	-0.0486059	0.0108982	7.87e-06	17527	T	A	0.0018	0.016	0.9098	218792
class.Coriobacteriia.id.809	rs67561917	20	62072077	0.00123808	21.4838	A	G	-0.0714367	0.0154113	5.39e-06	17333	A	G	0.0047	0.0206	0.8205	218792
class.Coriobacteriia.id.809	rs719099	10	65799217	0.00140904	24.954	A	G	0.0778402	0.0155815	5.43e-07	17687	A	G	0.0006	0.0266	0.9825	218792
class.Coriobacteriia.id.809	rs76779974	5	125460084	0.0012364	20.3231	C	G	0.0774888	0.0171877	5.63e-06	16419	C	G	-0.0237	0.0273	0.387	218792
class.Coriobacteriia.id.809	rs80046645	5	459415	0.00642656	20.7109	C	G	0.25584	0.0561995	4.66e-06	3204	C	G	-0.0396	0.0412	0.3366	218792
class.Coriobacteriia.id.809	rs8010111	14	39660509	0.00126919	20.3253	G	A	-0.103377	0.0229286	6.9e-06	15996	G	A	0.0058	0.0288	0.8408	218792
class.Deltaproteobacteria.id.3087	rs1035691	11	10658735	0.00135551	20.5856	A	G	-0.055176	0.0121602	9.65e-06	15168	A	G	0.0023	0.0163	0.8859	218792
class.Deltaproteobacteria.id.3087	rs112381107	9	15271933	0.00456613	20.4354	C	T	0.206594	0.0456908	4.63e-06	4457	C	T	-0.0319	0.0334	0.3403	218792
class.Deltaproteobacteria.id.3087	rs11599763	10	11855599	0.00141479	21.4872	T	C	-0.0544219	0.0117397	3.94e-06	15168	T	C	0.0072	0.0163	0.656401	218792
class.Deltaproteobacteria.id.3087	rs16851319	1	203308383	0.00144136	21.871	G	C	-0.0705516	0.0150849	5.68e-06	15154	G	C	-0.0332	0.0211	0.1146	218792
class.Deltaproteobacteria.id.3087	rs17084793	18	69312914	0.00130732	19.8475	G	A	-0.0710762	0.015953	5.69e-06	15164	G	A	0.0018	0.0224	0.9357	218792
class.Deltaproteobacteria.id.3087	rs17791387	9	81834426	0.00150796	22.7577	A	G	-0.0735881	0.0154246	1.6e-06	15071	A	G	-0.0259	0.0271	0.34	218792
class.Deltaproteobacteria.id.3087	rs2692012	1	203994218	0.00144544	18.9656	A	G	0.110335	0.0253336	3.14e-06	13104	A	G	-0.0901	0.0349	0.00978295	218792
class.Deltaproteobacteria.id.3087	rs2838334	21	45064961	0.00134839	20.4774	G	A	0.0561722	0.0124124	5.45e-06	15168	G	A	-0.0133	0.0167	0.426	218792
class.Deltaproteobacteria.id.3087	rs3935584	2	233929283	0.0013489	20.4824	C	T	-0.0523485	0.011566	7.5e-06	15166	C	T	-0.0091	0.0159	0.5667	218792
class.Deltaproteobacteria.id.3087	rs4506934	17	2856662	0.00143646	21.6627	C	T	-0.0936514	0.02012	3.59e-06	15061	C	T	-0.0174	0.0247	0.481	218792
class.Deltaproteobacteria.id.3087	rs55744759	8	57867671	0.00137297	20.851	A	G	-0.0779693	0.0170738	7.31e-06	15168	A	G	-0.0489	0.0251	0.0519099	218792
class.Deltaproteobacteria.id.3087	rs6058181	20	33694801	0.00163672	24.7518	C	T	0.0825716	0.0165958	3.4e-07	15100	C	T	0.1177	0.0215	4.68598e-08	218792
class.Deltaproteobacteria.id.3087	rs62020470	15	96161065	0.0013484	20.4774	A	G	-0.0585411	0.0129358	4.85e-06	15168	A	G	-0.019	0.0207	0.3582	218792
class.Deltaproteobacteria.id.3087	rs9928243	16	71541641	0.00137759	20.9199	C	A	-0.0538457	0.0117718	5.02e-06	15167	C	A	0.006	0.0159	0.7065	218792
class.Erysipelotrichia.id.2147	rs1074800	5	3002546	0.00114877	20.4567	A	G	0.0492438	0.010887	6.15e-06	17789	A	G	0.0031	0.0161	0.8482	218792
class.Erysipelotrichia.id.2147	rs10781552	10	133897233	0.00127068	22.6304	C	T	-0.0552212	0.0116074	2.33e-06	17789	C	T	-0.0035	0.0177	0.8447	218792
class.Erysipelotrichia.id.2147	rs17530232	13	40385457	0.00126433	21.0397	A	G	0.10305	0.0224648	2.79e-06	16622	A	G	0.0299	0.0356	0.4014	218792
class.Erysipelotrichia.id.2147	rs1884466	1	64139196	0.00108423	19.7576	C	T	-0.0475363	0.0106939	9.53e-06	18205	C	T	-0.0052	0.0159	0.743599	218792
class.Erysipelotrichia.id.2147	rs2300774	3	195793712	0.00132092	24.0911	G	A	0.0524152	0.0106784	8.95e-07	18216	G	A	-0.0043	0.016	0.7863	218792
class.Erysipelotrichia.id.2147	rs290833	1	97457427	0.0011198	19.9402	T	G	-0.0497374	0.0111376	8.03e-06	17789	T	G	0.0057	0.016	0.721099	218792
class.Erysipelotrichia.id.2147	rs35161940	17	70327224	0.00126771	23.1157	T	C	-0.0806041	0.0167641	1.85e-06	18213	T	C	0.0222	0.0258	0.3892	218792
class.Erysipelotrichia.id.2147	rs4078432	14	48997206	0.00116359	20.7209	C	T	-0.0608929	0.0133764	4.23e-06	17789	C	T	0.0214	0.0211	0.3097	218792
class.Erysipelotrichia.id.2147	rs56970041	14	80357610	0.001063	19.3832	T	G	0.0724144	0.0164471	5.4e-06	18217	T	G	0.0098	0.0331	0.767901	218792
class.Erysipelotrichia.id.2147	rs62504403	8	38803551	0.00166794	28.3673	C	T	0.0681159	0.0127883	1.12e-07	16981	C	T	-0.0154	0.0201	0.4438	218792
class.Erysipelotrichia.id.2147	rs7234058	18	5830507	0.00140515	23.741	T	C	-0.0945759	0.0194091	9.12e-07	16874	T	C	0.058	0.0276	0.0355402	218792
class.Erysipelotrichia.id.2147	rs7826267	8	2954952	0.00100859	17.753	T	G	-0.0839071	0.0199131	9.28e-06	17586	T	G	-0.0261	0.0324	0.4212	218792
class.Erysipelotrichia.id.2147	rs8003149	14	56156504	0.00116526	21.2454	C	T	0.0538798	0.0116888	4.08e-06	18213	C	T	-0.0023	0.0168	0.8901	218792
class.Gammaproteobacteria.id.3303	rs11181912	12	43572952	0.00148168	23.7643	G	A	-0.0579153	0.0118796	9.95e-07	16017	G	A	0.0153	0.017	0.3679	218792
class.Gammaproteobacteria.id.3303	rs12404135	1	186502694	0.00137248	20.9302	A	G	-0.0788843	0.0172415	8.89e-06	15231	A	G	-0.0485	0.0298	0.1035	218792
class.Gammaproteobacteria.id.3303	rs6469506	8	115123937	0.00135001	21.6578	T	A	0.0541424	0.0116333	3.29e-06	16023	T	A	-0.0285	0.0168	0.090099	218792
class.Gammaproteobacteria.id.3303	rs6706173	2	167986992	0.00160328	25.7225	A	C	0.074251	0.0146392	1.99e-07	16020	A	C	-0.0358	0.023	0.1203	218792
class.Gammaproteobacteria.id.3303	rs75101789	3	18615903	0.00124672	19.9998	C	T	0.0729012	0.0163003	8.79e-06	16024	C	T	0.0564	0.0281	0.0451097	218792
class.Gammaproteobacteria.id.3303	rs79795896	18	48185248	0.00270228	20.5253	A	G	-0.15921	0.0351373	7.92e-06	7577	A	G	0.0498	0.0376	0.1848	218792
class.Gammaproteobacteria.id.3303	rs9494710	6	137612554	0.00131855	20.6599	C	T	-0.0549673	0.0120924	4.55e-06	15650	C	T	-0.0295	0.017	0.0828304	218792
class.Gammaproteobacteria.id.3303	rs9973122	18	75633634	0.00132395	20.7447	T	A	0.0740614	0.0162596	6.77e-06	15650	T	A	-0.0106	0.0291	0.715899	218792
class.Lentisphaeria.id.2250	rs1002941	15	101242690	0.00425588	20.2249	G	A	0.105025	0.0233484	8.15e-06	4734	G	A	-0.0012	0.0184	0.9473	218792
class.Lentisphaeria.id.2250	rs11770843	7	146795379	0.00459233	21.6974	C	T	0.109431	0.0234879	1.91e-06	4705	C	T	0.0295	0.017	0.0823095	218792
class.Lentisphaeria.id.2250	rs17114848	15	25162535	0.004641	22.0636	G	A	0.152377	0.0324332	4.06e-06	4734	G	A	-0.0441	0.0268	0.1	218792
class.Lentisphaeria.id.2250	rs2031282	13	20687179	0.00430972	20.4819	A	G	0.122369	0.0270329	4.38e-06	4734	A	G	0.0221	0.021	0.2936	218792
class.Lentisphaeria.id.2250	rs2731834	5	94720245	0.00448751	21.3261	C	G	0.109438	0.023693	4.24e-06	4733	C	G	-0.0087	0.0186	0.6383	218792
class.Lentisphaeria.id.2250	rs2825714	21	21023966	0.00474471	22.559	A	G	-0.13741	0.0289246	1.72e-06	4734	A	G	-0.0327	0.0213	0.1246	218792
class.Lentisphaeria.id.2250	rs62570196	9	111086170	0.00647509	24.1792	C	T	-0.21635	0.0439866	1.08e-06	3712	C	T	-0.0019	0.0399	0.9619	218792
class.Lentisphaeria.id.2250	rs72640280	1	11943792	0.0053469	20.5027	A	G	0.220207	0.0486196	5.18e-06	3816	A	G	0.0324	0.0345	0.3474	218792
class.Lentisphaeria.id.2250	rs73113483	3	6223568	0.00435905	20.6473	T	A	-0.131217	0.0288713	8.66e-06	4718	T	A	0.0061	0.0242	0.8014	218792
class.Lentisphaeria.id.2250	rs77599476	20	61394262	0.00614212	22.9899	A	G	0.230292	0.0480168	1.86e-06	3722	A	G	0.0597	0.0344	0.0824195	218792
class.Melainabacteria.id.1589	rs10148250	14	107061448	0.00362995	19.859	G	A	0.0861928	0.0193381	8.67e-06	5453	G	A	-0.0008	0.0168	0.9622	218792
class.Melainabacteria.id.1589	rs10738747	9	26184578	0.00330551	19.5075	G	A	0.0814624	0.0184409	9.96e-06	5884	G	A	-0.0111	0.016	0.488	218792
class.Melainabacteria.id.1589	rs11150282	16	80493705	0.0042785	25.227	T	C	0.0989488	0.0196972	6.03e-07	5873	T	C	-0.0039	0.0166	0.814	218792
class.Melainabacteria.id.1589	rs113884518	9	24648997	0.00456503	20.3617	T	C	-0.205352	0.0454982	8.06e-06	4442	T	C	-0.0364	0.0516	0.4801	218792
class.Melainabacteria.id.1589	rs1221147	9	122046549	0.00341217	19.742	T	A	0.123968	0.0278958	7.11e-06	5768	T	A	-0.0151	0.0222	0.4972	218792
class.Melainabacteria.id.1589	rs16851659	1	230523039	0.0039111	23.0954	G	C	-0.0896103	0.0186432	1.27e-06	5884	G	C	0.0197	0.0167	0.2374	218792
class.Melainabacteria.id.1589	rs28678345	17	53906328	0.00479265	20.8088	T	C	0.214848	0.0470878	6.69e-06	4323	T	C	0.0142	0.037	0.7019	218792
class.Melainabacteria.id.1589	rs367480	11	2937631	0.00344025	20.3157	G	A	-0.083758	0.0185796	8.2e-06	5887	G	A	-0.0115	0.0166	0.4897	218792
class.Melainabacteria.id.1589	rs4129395	9	115975389	0.00396586	23.432	G	A	0.0896187	0.0185106	1.48e-06	5887	G	A	0.0097	0.0159	0.5414	218792
class.Melainabacteria.id.1589	rs73074665	7	20010624	0.00377741	21.8252	A	T	0.166216	0.0355728	2.87e-06	5758	A	T	-0.0334	0.0324	0.3029	218792
class.Melainabacteria.id.1589	rs789069	18	1008278	0.00331109	19.5239	A	C	-0.103539	0.0234287	6.85e-06	5879	A	C	-0.0247	0.0227	0.2766	218792
class.Melainabacteria.id.1589	rs79790072	15	100747683	0.00523152	21.5883	T	C	0.226722	0.0487841	3.29e-06	4107	T	C	-0.1012	0.0458	0.0272101	218792
class.Melainabacteria.id.1589	rs9864379	3	14306949	0.00513394	29.8015	T	C	-0.159735	0.0292553	5.36e-08	5777	T	C	-0.0525	0.0224	0.0190599	218792
class.Methanobacteria.id.119	rs10202904	2	125440268	0.00719054	26.747	T	G	-0.121754	0.0235357	3.01e-07	3695	T	G	-0.0219	0.0162	0.1755	218792
class.Methanobacteria.id.119	rs10424197	19	46439321	0.00543557	20.1997	G	A	-0.111274	0.0247517	9.28e-06	3698	G	A	0.0055	0.0183	0.7659	218792
class.Methanobacteria.id.119	rs11018665	11	89349287	0.00532506	19.7868	A	T	0.111465	0.0250516	6.52e-06	3698	A	T	0.012	0.0185	0.517201	218792
class.Methanobacteria.id.119	rs12825290	12	43701132	0.00610007	19.2841	C	G	-0.216781	0.0493496	6.08e-06	3144	C	G	0.056	0.0332	0.091829	218792
class.Methanobacteria.id.119	rs4257531	3	2086167	0.00638397	20.303	G	A	0.164498	0.0364959	7.44e-06	3162	G	A	0.0399	0.0261	0.1267	218792
class.Methanobacteria.id.119	rs56131665	5	178175507	0.00575311	20.6574	G	A	0.178661	0.039298	6.18e-06	3572	G	A	0.0332	0.0257	0.1964	218792
class.Methanobacteria.id.119	rs62241835	3	15019689	0.00695183	23.6687	G	T	-0.203385	0.0417931	1.63e-06	3383	G	T	0.0226	0.056	0.6868	218792
class.Methanobacteria.id.119	rs6508769	19	28827760	0.00594705	19.8444	T	C	0.153519	0.0344519	8.23e-06	3319	T	C	0.0036	0.0224	0.8711	218792
class.Methanobacteria.id.119	rs73068003	7	10773932	0.0054432	20.1953	G	T	-0.15814	0.0351803	8.45e-06	3692	G	T	0.0066	0.0269	0.8057	218792
class.Methanobacteria.id.119	rs73457410	13	41956181	0.0069034	24.3021	A	G	0.21534	0.0436695	1.41e-06	3498	A	G	0.0405	0.0325	0.2127	218792
class.Methanobacteria.id.119	rs75208022	12	21338861	0.00673465	21.7038	C	T	-0.227245	0.048763	5.92e-06	3203	C	T	0.0019	0.0272	0.9431	218792
class.Methanobacteria.id.119	rs894996	4	104418307	0.00647634	23.3364	C	A	0.216999	0.0449076	1.88e-06	3582	C	A	-0.0029	0.031	0.9254	218792
class.Mollicutes.id.3920	rs10108398	8	59440824	0.00227797	24.9551	G	A	0.0769142	0.0153953	1.09e-06	10932	G	A	0.0223	0.0177	0.2084	218792
class.Mollicutes.id.3920	rs11890098	2	157532549	0.00206304	23.5466	A	G	0.074438	0.0153389	9.57e-07	11392	A	G	-0.0148	0.0177	0.4013	218792
class.Mollicutes.id.3920	rs12566890	1	61850864	0.00168358	19.1729	T	G	-0.101147	0.0230978	3.65e-06	11371	T	G	-0.004	0.0238	0.8662	218792
class.Mollicutes.id.3920	rs17214486	14	97159674	0.00177285	20.2198	C	A	0.06099	0.0135623	6.61e-06	11387	C	A	-0.0042	0.017	0.8067	218792
class.Mollicutes.id.3920	rs2464826	7	79490250	0.0018038	19.8705	A	C	0.0944239	0.0211806	8.4e-06	10998	A	C	0.0043	0.025	0.8647	218792
class.Mollicutes.id.3920	rs28537087	15	95309676	0.00166669	18.9986	G	A	0.0820873	0.0188312	8.07e-06	11382	G	A	0.0156	0.0184	0.3957	218792
class.Mollicutes.id.3920	rs3768491	1	109965986	0.00189381	20.8715	A	G	-0.0681052	0.0149061	4.23e-06	11002	A	G	0.0059	0.0175	0.733599	218792
class.Mollicutes.id.3920	rs4885016	13	73170489	0.00178493	20.3596	T	C	-0.0819606	0.0181628	7.27e-06	11388	T	C	-0.0296	0.0234	0.2058	218792
class.Mollicutes.id.3920	rs6043847	20	16259524	0.00191677	21.3707	T	C	-0.114937	0.0248606	4.55e-06	11130	T	C	-0.0145	0.0338	0.6675	218792
class.Mollicutes.id.3920	rs72901605	11	47103877	0.00211771	22.3341	T	C	-0.0841852	0.0178119	3.26e-06	10526	T	C	-0.0502	0.0249	0.0441103	218792
class.Mollicutes.id.3920	rs74603314	14	46519718	0.00506947	22.9136	T	C	0.221639	0.0462918	1.56e-06	4499	T	C	-0.0257	0.0409	0.5295	218792
class.Mollicutes.id.3920	rs78169027	11	108439087	0.00197144	20.8201	A	G	-0.108283	0.0237289	5.88e-06	10542	A	G	0.0584	0.0336	0.0823797	218792
class.Negativicutes.id.2164	rs1135612	7	75609677	0.00108676	19.7592	G	A	0.0529785	0.0119177	9.26e-06	18164	G	A	-0.0094	0.0195	0.6272	218792
class.Negativicutes.id.2164	rs13086907	3	142135117	0.00123898	22.5291	G	A	0.0625312	0.0131735	1.95e-06	18163	G	A	0.0027	0.0191	0.8876	218792
class.Negativicutes.id.2164	rs1447205	8	41231597	0.00117988	21.4554	G	C	-0.0502053	0.0108382	2.93e-06	18165	G	C	0.0235	0.0165	0.1557	218792
class.Negativicutes.id.2164	rs1643968	5	165266628	0.00139261	25.3362	T	C	-0.0565284	0.0112298	4.15e-07	18170	T	C	-0.0113	0.0166	0.4932	218792
class.Negativicutes.id.2164	rs1649999	10	80086072	0.00112128	20.2439	A	G	0.0748989	0.0166458	7.58e-06	18036	A	G	0.0251	0.0271	0.3542	218792
class.Negativicutes.id.2164	rs2834062	21	34377485	0.00110986	20.1874	A	G	0.0489057	0.0108842	8.44e-06	18171	A	G	0.0356	0.0174	0.0410497	218792
class.Negativicutes.id.2164	rs4463806	10	115597993	0.000972681	17.6791	T	C	-0.0543966	0.0129365	7.81e-06	18160	T	C	-0.0209	0.0202	0.303	218792
class.Negativicutes.id.2164	rs4722181	7	22817571	0.0012346	22.4493	T	G	0.0501306	0.0105798	2e-06	18163	T	G	-0.0052	0.0159	0.7422	218792
class.Negativicutes.id.2164	rs60274479	16	21249925	0.00137132	24.1794	T	C	-0.0659623	0.0134137	1.16e-06	17610	T	C	-0.0156	0.02	0.4371	218792
class.Negativicutes.id.2164	rs61249479	9	124912908	0.00116768	21.2333	A	C	0.0777075	0.0168628	2.95e-06	18165	A	C	-0.016	0.0219	0.4667	218792
class.Negativicutes.id.2164	rs71405394	15	101245088	0.00162343	22.5358	G	A	-0.114178	0.02405	2.17e-06	13861	G	A	-0.0007	0.0316	0.9815	218792
class.Negativicutes.id.2164	rs73232831	4	17413426	0.00247119	23.2372	G	A	-0.151829	0.0314932	1.87e-06	9382	G	A	0.0228	0.0432	0.5967	218792
class.Negativicutes.id.2164	rs9423647	10	5579818	0.00113436	20.6257	G	A	0.047817	0.0105282	6.06e-06	18164	G	A	0.0194	0.016	0.2252	218792
class.Verrucomicrobiae.id.4029	rs11184341	1	105422565	0.00178625	21.2264	G	C	0.0655342	0.0142231	4.13e-06	11864	G	C	0.0048	0.0178	0.788	218792
class.Verrucomicrobiae.id.4029	rs111862613	12	130309670	0.00182539	21.248	T	C	0.090699	0.0196746	3.74e-06	11621	T	C	0.0048	0.0214	0.8222	218792
class.Verrucomicrobiae.id.4029	rs117107102	18	49473635	0.00450094	22.4844	A	G	0.204683	0.0431573	2.92e-06	4975	A	G	0.0608	0.0372	0.1021	218792
class.Verrucomicrobiae.id.4029	rs11729256	4	95027272	0.00209725	24.9235	T	C	0.0749798	0.0150177	6.73e-07	11861	T	C	-0.0147	0.0211	0.486	218792
class.Verrucomicrobiae.id.4029	rs12908520	15	97570657	0.00187966	22.3366	G	A	0.0618926	0.0130946	2.17e-06	11863	G	A	-0.0022	0.016	0.8901	218792
class.Verrucomicrobiae.id.4029	rs2602429	16	81063149	0.00195194	22.8589	C	T	0.0746844	0.0156194	2.58e-06	11690	C	T	-0.0131	0.0181	0.4693	218792
class.Verrucomicrobiae.id.4029	rs4242783	10	5064327	0.00185979	21.7777	G	A	0.0689292	0.0147693	2.64e-06	11690	G	A	-0.0046	0.0177	0.793	218792
class.Verrucomicrobiae.id.4029	rs4936098	11	130280667	0.00191785	22.7817	A	G	0.0648843	0.0135928	1.12e-06	11858	A	G	0.0051	0.0166	0.7587	218792
class.Verrucomicrobiae.id.4029	rs61779207	1	41074472	0.00175963	20.4283	G	A	-0.0758309	0.0167762	6.72e-06	11591	G	A	-0.001	0.0191	0.9601	218792
class.Verrucomicrobiae.id.4029	rs74542928	4	100544188	0.00200272	22.5036	T	C	0.112164	0.0236422	1.63e-06	11216	T	C	-0.0302	0.0371	0.415	218792
class.Verrucomicrobiae.id.4029	rs9349825	6	56341481	0.0019273	22.8942	A	G	-0.0704036	0.0147128	2.54e-06	11858	A	G	0.0017	0.0203	0.9343	218792
class.Verrucomicrobiae.id.4029	rs941682	20	31867840	0.00163086	19.287	G	A	-0.0631436	0.0143767	9.61e-06	11809	G	A	0.021	0.0178	0.2368	218792
family.Acidaminococcaceae.id.2166	rs262812	6	158647999	0.0017585	21.31	T	C	-0.065675	0.0142257	3.25e-06	12099	T	C	-0.0128	0.0173	0.4613	218792
family.Acidaminococcaceae.id.2166	rs2933324	9	107117653	0.00177848	22.3116	A	G	-0.0662557	0.0140257	2.24e-06	12525	A	G	0.0292	0.0189	0.1229	218792
family.Acidaminococcaceae.id.2166	rs45497800	20	61991833	0.00185014	20.9713	T	C	-0.117863	0.0257351	5.86e-06	11316	T	C	-0.0044	0.0228	0.8484	218792
family.Acidaminococcaceae.id.2166	rs6427992	1	203102563	0.00168458	21.135	G	C	-0.0595857	0.01296	4.24e-06	12527	G	C	0.008	0.0164	0.6268	218792
family.Acidaminococcaceae.id.2166	rs6589457	11	114701288	0.00304147	22.5267	A	G	0.165911	0.0349516	2.32e-06	7386	A	G	0.0045	0.0363	0.9016	218792
family.Acidaminococcaceae.id.2166	rs6923842	6	5723181	0.00185644	22.1364	T	C	-0.0796106	0.0169192	2.21e-06	11904	T	C	0.0332	0.0248	0.1813	218792
family.Acidaminococcaceae.id.2166	rs74540770	3	186553389	0.00188418	20.0175	G	A	-0.108969	0.0243533	7.09e-06	10606	G	A	0.0018	0.0293	0.952	218792
family.Acidaminococcaceae.id.2166	rs78702810	3	18462531	0.00246864	19.7733	T	C	-0.143755	0.0323244	9.16e-06	7992	T	C	0.0495	0.0261	0.0576501	218792
family.Actinomycetaceae.id.421	rs2889192	9	76394568	0.00267945	20.7087	G	T	0.0887537	0.0195009	3.64e-06	7710	G	T	-0.0375	0.0223	0.0934609	218792
family.Actinomycetaceae.id.421	rs34583783	6	67207371	0.00283627	21.9242	G	T	0.123756	0.026427	5.48e-06	7710	G	T	-0.0108	0.0334	0.746299	218792
family.Actinomycetaceae.id.421	rs35011108	6	133007480	0.00630729	23.0281	A	G	0.241826	0.0503796	1.83e-06	3630	A	G	-0.006	0.0318	0.8513	218792
family.Actinomycetaceae.id.421	rs4073240	6	169224781	0.0026654	20.5998	G	A	0.0747546	0.0164684	6.05e-06	7710	G	A	0.0299	0.0163	0.0665503	218792
family.Actinomycetaceae.id.421	rs58484246	15	29851297	0.00262561	20.2915	T	C	0.0761407	0.0169007	6.12e-06	7710	T	C	0.0326	0.0166	0.0495005	218792
family.Alcaligenaceae.id.2875	rs112135816	9	82485327	0.0013113	20.4083	T	G	-0.0775052	0.0171554	5.28e-06	15545	T	G	-0.0185	0.0333	0.578699	218792
family.Alcaligenaceae.id.2875	rs112159068	6	138305038	0.00187368	21.8768	A	T	0.131484	0.0281089	3.56e-06	11656	A	T	-0.034	0.0479	0.4782	218792
family.Alcaligenaceae.id.2875	rs1153990	5	104233461	0.00124488	20.9475	A	G	-0.058727	0.0128306	5.97e-06	16808	A	G	0.0053	0.0171	0.7563	218792
family.Alcaligenaceae.id.2875	rs147968	16	85945839	0.00116969	19.6831	C	T	0.0489475	0.0110321	9.13e-06	16810	C	T	0.0023	0.0159	0.884	218792
family.Alcaligenaceae.id.2875	rs17000015	4	75867283	0.00144013	23.6161	A	T	-0.0609257	0.0125363	1.13e-06	16377	A	T	-0.0058	0.0178	0.7452	218792
family.Alcaligenaceae.id.2875	rs2367850	3	193456274	0.00139109	22.8108	G	C	0.0629104	0.0131712	1.85e-06	16377	G	C	-0.0356	0.0195	0.0671707	218792
family.Alcaligenaceae.id.2875	rs28480294	15	71522509	0.00122172	20.0301	T	C	-0.0516967	0.0115503	6.61e-06	16377	T	C	0.0076	0.0167	0.6501	218792
family.Alcaligenaceae.id.2875	rs4033856	4	45642485	0.0014998	23.4635	C	T	0.081834	0.0168931	1.03e-06	15623	C	T	-0.0279	0.0282	0.3227	218792
family.Alcaligenaceae.id.2875	rs62191117	2	239900775	0.00156878	26.2178	A	G	0.0684302	0.0133636	2.76e-07	16688	A	G	0.0025	0.0197	0.8994	218792
family.Alcaligenaceae.id.2875	rs62395635	5	173497796	0.00145009	21.4926	T	C	0.110583	0.0238514	3.35e-06	14802	T	C	-0.0318	0.0331	0.3368	218792
family.Alcaligenaceae.id.2875	rs67737557	20	29836081	0.0014906	23.6971	C	G	0.0738409	0.0151678	1.04e-06	15876	C	G	0.0202	0.0199	0.3098	218792
family.Alcaligenaceae.id.2875	rs6969323	7	104214487	0.00125523	21.1244	A	C	-0.0593564	0.0129137	3.89e-06	16810	A	C	0.012	0.0191	0.5305	218792
family.Alcaligenaceae.id.2875	rs7302582	12	1396151	0.00138894	21.0175	G	C	-0.106817	0.023298	3.34e-06	15113	G	C	0.0164	0.035	0.6392	218792
family.Alcaligenaceae.id.2875	rs74776516	11	20763367	0.00134912	19.5887	T	G	-0.0944052	0.0213287	6.85e-06	14502	T	G	0.0213	0.0321	0.5057	218792
family.Alcaligenaceae.id.2875	rs7638039	3	70588939	0.00132601	22.2919	T	C	0.0603335	0.0127779	2.7e-06	16791	T	C	-0.051	0.0184	0.00550199	218792
family.Alcaligenaceae.id.2875	rs9537886	13	58545246	0.0015804	26.6007	A	C	-0.0570888	0.0110683	2.35e-07	16807	A	C	-0.0141	0.016	0.3791	218792
family.Bacteroidaceae.id.917	rs11585893	1	10644351	0.00141067	25.1722	A	G	-0.0740746	0.0147633	1.8e-06	17821	A	G	0.006	0.0186	0.745799	218792
family.Bacteroidaceae.id.917	rs13207588	6	41519430	0.00114879	20.3627	A	G	-0.059205	0.0131195	7.49e-06	17707	A	G	-0.001	0.0204	0.9607	218792
family.Bacteroidaceae.id.917	rs1340391	1	102960989	0.00109376	20.0377	T	C	-0.0592004	0.0132244	6.73e-06	18302	T	C	-0.0049	0.0231	0.8311	218792
family.Bacteroidaceae.id.917	rs17619981	19	24342250	0.00140263	22.1913	T	G	0.0880978	0.0187002	2.69e-06	15801	T	G	0.0008	0.0232	0.9734	218792
family.Bacteroidaceae.id.917	rs2023437	14	22045949	0.00124414	21.7771	T	C	-0.0782324	0.0167634	5.02e-06	17484	T	C	0.0083	0.0242	0.732399	218792
family.Bacteroidaceae.id.917	rs2366421	3	62019400	0.00110998	20.3319	T	A	-0.0528153	0.0117124	7.65e-06	18299	T	A	-0.0172	0.0206	0.4057	218792
family.Bacteroidaceae.id.917	rs28757219	6	29143451	0.00155418	23.0859	T	A	0.0818398	0.0170319	1.29e-06	14833	T	A	0.0248	0.0245	0.3113	218792
family.Bacteroidaceae.id.917	rs495004	9	112855426	0.00123421	21.8787	C	G	-0.0607475	0.0129865	3.42e-06	17707	C	G	0.0002	0.0189	0.9896	218792
family.Bacteroidaceae.id.917	rs66474973	20	58614443	0.0014001	24.4001	G	T	0.0812515	0.0164479	6.81e-07	17405	G	T	-0.0454	0.0262	0.0829507	218792
family.Bacteroidaceae.id.917	rs66710942	3	77215327	0.00115709	20.642	C	T	0.0488038	0.0107412	5.86e-06	17821	C	T	-0.0043	0.0159	0.785301	218792
family.Bacteroidaceae.id.917	rs6795673	3	10593224	0.00142865	26.1803	C	T	0.0538565	0.0105251	3.38e-07	18301	C	T	0.0026	0.0158	0.8704	218792
family.Bacteroidaceae.id.917	rs9507307	13	24913678	0.00120359	21.91	C	T	0.0604456	0.0129128	2.13e-06	18184	C	T	-0.0071	0.0185	0.6999	218792
family.BacteroidalesS24.7group.id.11173	rs10872669	6	151515172	0.00269787	19.9263	A	G	-0.123071	0.0275665	9.49e-06	7368	A	G	0.0279	0.0279	0.3173	218792
family.BacteroidalesS24.7group.id.11173	rs11135366	5	164763068	0.00263446	21.0019	C	G	0.0842142	0.0183739	8.78e-06	7953	C	G	0.0084	0.0186	0.6517	218792
family.BacteroidalesS24.7group.id.11173	rs12748533	1	242767252	0.0028361	22.5998	G	T	-0.0821108	0.0172701	2.59e-06	7948	G	T	0.0159	0.0176	0.3664	218792
family.BacteroidalesS24.7group.id.11173	rs17043785	2	53139362	0.004922	25.7507	T	C	-0.176187	0.0347133	5.12e-07	5208	T	C	-0.0142	0.028	0.611699	218792
family.BacteroidalesS24.7group.id.11173	rs61508842	3	158653545	0.00266577	20.2445	T	C	0.122574	0.0272389	7.83e-06	7576	T	C	-0.011	0.028	0.6944	218792
family.BacteroidalesS24.7group.id.11173	rs6831034	4	149300138	0.00285927	21.7182	T	A	-0.0956546	0.0205228	6.1e-06	7576	T	A	0.0076	0.0278	0.784899	218792
family.BacteroidalesS24.7group.id.11173	rs689695	15	47352866	0.00298027	23.7699	C	A	0.0814578	0.0167057	1.28e-06	7954	C	A	0.0191	0.0174	0.2734	218792
family.BacteroidalesS24.7group.id.11173	rs738193	22	25943322	0.0033444	26.0933	T	C	0.0847328	0.0165856	3.82e-07	7778	T	C	0.0208	0.0166	0.2095	218792
family.BacteroidalesS24.7group.id.11173	rs78609301	6	63236747	0.00246197	19.6234	A	G	-0.0867065	0.0195709	7.09e-06	7953	A	G	0.0027	0.0173	0.8748	218792
family.BacteroidalesS24.7group.id.11173	rs941000	7	90714667	0.00346994	27.0762	C	T	0.0850266	0.0163382	3.16e-07	7778	C	T	-0.0188	0.0165	0.2554	218792
family.Bifidobacteriaceae.id.433	rs10496759	2	137603404	0.00130537	19.4912	G	C	0.0637133	0.0144305	8.8e-06	14914	G	C	0.022	0.0191	0.2504	218792
family.Bifidobacteriaceae.id.433	rs10831953	11	13098051	0.00126352	18.8668	G	A	0.0537537	0.0123746	9.95e-06	14915	G	A	-0.0111	0.0173	0.5224	218792
family.Bifidobacteriaceae.id.433	rs10841473	12	20378911	0.00151559	22.6347	G	C	-0.0613031	0.0128844	2.28e-06	14914	G	C	-0.0144	0.0188	0.4442	218792
family.Bifidobacteriaceae.id.433	rs10857328	4	161211924	0.00132377	19.7676	T	A	0.0562	0.0126395	7.24e-06	14915	T	A	0.004	0.0176	0.8219	218792
family.Bifidobacteriaceae.id.433	rs12446429	16	898055	0.00128618	18.0374	T	C	0.0810099	0.019073	8.53e-06	14008	T	C	0.0305	0.0206	0.1399	218792
family.Bifidobacteriaceae.id.433	rs13020688	2	192878532	0.00154457	22.8841	G	A	0.0584045	0.0122081	1.57e-06	14795	G	A	0.0044	0.0173	0.7993	218792
family.Bifidobacteriaceae.id.433	rs182549	2	136616754	0.0056913	85.3602	C	T	0.11707	0.0126703	5.94e-20	14915	C	T	-0.0313	0.0162	0.0535599	218792
family.Bifidobacteriaceae.id.433	rs4567981	2	49906864	0.00163465	24.2209	T	A	0.0577763	0.0117388	8.88e-07	14795	T	A	-0.0292	0.0159	0.0663499	218792
family.Bifidobacteriaceae.id.433	rs4957061	5	521096	0.00160347	23.7582	T	C	0.0569873	0.0116907	1.15e-06	14795	T	C	0.0121	0.0162	0.4576	218792
family.Bifidobacteriaceae.id.433	rs540489	17	72897722	0.00142475	20.9538	T	G	-0.0632518	0.013817	5.37e-06	14688	T	G	-0.0081	0.0209	0.697301	218792
family.Bifidobacteriaceae.id.433	rs55888705	4	1517826	0.00132662	19.8088	A	G	0.053673	0.0120586	8.66e-06	14914	A	G	-0.0112	0.0176	0.5265	218792
family.Bifidobacteriaceae.id.433	rs677208	18	4304187	0.00130843	19.5382	G	C	0.0728589	0.0164821	6e-06	14915	G	C	-0.0105	0.0211	0.6179	218792
family.Bifidobacteriaceae.id.433	rs6899771	6	97406220	0.00143719	20.3626	A	G	-0.0914312	0.0202604	7.28e-06	14150	A	G	0.0265	0.0263	0.314	218792
family.Bifidobacteriaceae.id.433	rs7174549	15	92463303	0.00131171	19.5872	C	T	0.0551726	0.0124655	6.87e-06	14915	C	T	0.0063	0.0165	0.7052	218792
family.Bifidobacteriaceae.id.433	rs7322849	13	112859829	0.00202874	30.3161	T	C	0.110676	0.0200996	1.74e-08	14915	T	C	-0.0523	0.0278	0.0595402	218792
family.Bifidobacteriaceae.id.433	rs73797465	5	142800289	0.0013806	20.4514	T	G	-0.0942612	0.0208421	4.85e-06	14795	T	G	0.0096	0.0253	0.703701	218792
family.Bifidobacteriaceae.id.433	rs76671854	5	169748189	0.001704	23.7619	C	G	-0.0892981	0.0183177	1.04e-06	13923	C	G	-0.0335	0.0241	0.1647	218792
family.Bifidobacteriaceae.id.433	rs857444	6	14617591	0.00141112	21.0723	C	T	0.0553965	0.0120669	3.82e-06	14914	C	T	0.0121	0.0165	0.463	218792
family.Christensenellaceae.id.1866	rs117186816	11	123936128	0.00516792	22.379	G	A	-0.206476	0.0436362	6.52e-06	4310	G	A	-0.025	0.0276	0.3664	218792
family.Christensenellaceae.id.1866	rs12380890	9	38002256	0.00122115	20.5942	A	G	-0.0503972	0.0111047	5.78e-06	16846	A	G	0.003	0.0159	0.8526	218792
family.Christensenellaceae.id.1866	rs12657403	5	3174785	0.00126951	20.6468	A	G	0.078108	0.0171887	5.59e-06	16245	A	G	-0.0064	0.0358	0.8584	218792
family.Christensenellaceae.id.1866	rs4076564	6	169640257	0.00616627	23.1305	G	A	-0.188623	0.039209	8.06e-06	3730	G	A	-0.0284	0.0353	0.4209	218792
family.Christensenellaceae.id.1866	rs4805124	19	35884728	0.00117966	19.8949	C	G	0.0486508	0.0109067	8.36e-06	16847	C	G	-0.0189	0.0158	0.2315	218792
family.Christensenellaceae.id.1866	rs62573205	9	137786999	0.00142669	24.0541	G	A	-0.0654804	0.0133503	1.49e-06	16838	G	A	-0.0062	0.0199	0.753	218792
family.Christensenellaceae.id.1866	rs7211194	17	13541941	0.00119616	19.6812	C	T	0.0492094	0.0110916	9.94e-06	16436	C	T	0.0053	0.0159	0.741401	218792
family.Christensenellaceae.id.1866	rs72706624	9	15518852	0.00134037	19.9541	G	T	0.0882626	0.0197575	6.38e-06	14869	G	T	-0.018	0.0258	0.4856	218792
family.Christensenellaceae.id.1866	rs77867022	7	120333701	0.00441031	17.8567	G	T	-0.160443	0.0379589	8.82e-06	4033	G	T	-0.0028	0.0304	0.9263	218792
family.Christensenellaceae.id.1866	rs870002	8	62220151	0.00117533	19.8217	C	T	0.0488951	0.0109817	6.54e-06	16847	C	T	0.0087	0.0161	0.5905	218792
family.Christensenellaceae.id.1866	rs892686	9	83043376	0.00126296	21.3015	A	G	0.0506107	0.0109651	4.12e-06	16847	A	G	-0.0044	0.0159	0.7843	218792
family.Christensenellaceae.id.1866	rs9608766	22	29828040	0.00128295	20.7886	T	C	-0.0682134	0.01496	3.33e-06	16185	T	C	-0.0014	0.0182	0.939	218792
family.Clostridiaceae1.id.1869	rs10875374	1	101804809	0.00141504	20.1943	C	T	-0.0536759	0.0119436	8.1e-06	14253	C	T	-0.0157	0.0159	0.3237	218792
family.Clostridiaceae1.id.1869	rs12186080	3	132596627	0.00148699	21.2092	G	A	0.0748236	0.016246	5.34e-06	14244	G	A	0.0532	0.0213	0.0126401	218792
family.Clostridiaceae1.id.1869	rs12341505	9	136710881	0.00144543	20.6243	G	A	0.0814503	0.0179338	4.54e-06	14250	G	A	0.0473	0.0272	0.0816094	218792
family.Clostridiaceae1.id.1869	rs12490337	3	111482845	0.00142223	20.297	C	G	-0.0616944	0.013693	6.91e-06	14253	C	G	0.0032	0.0198	0.8724	218792
family.Clostridiaceae1.id.1869	rs2795528	10	43270264	0.00333179	21.4248	G	A	-0.180969	0.0390911	3.81e-06	6411	G	A	-0.0134	0.0349	0.7	218792
family.Clostridiaceae1.id.1869	rs2817172	1	3041519	0.00149663	20.665	C	T	0.0563367	0.012392	5.27e-06	13789	C	T	-0.0193	0.0162	0.2334	218792
family.Clostridiaceae1.id.1869	rs4723021	7	30934659	0.0014109	19.3284	T	C	-0.106376	0.0241944	7.42e-06	13682	T	C	0.0347	0.0316	0.2714	218792
family.Clostridiaceae1.id.1869	rs550843	6	165722832	0.00133603	19.0399	T	C	-0.0734787	0.0168383	7.09e-06	14234	T	C	0.0066	0.0178	0.7112	218792
family.Clostridiaceae1.id.1869	rs56188186	16	87710690	0.00149598	19.8006	A	G	0.0967774	0.0217471	8.24e-06	13218	A	G	0.0107	0.0371	0.772601	218792
family.Clostridiaceae1.id.1869	rs62397761	6	48093014	0.00143274	20.4402	A	G	0.0615805	0.0136198	9.08e-06	14248	A	G	-0.0087	0.017	0.606801	218792
family.Clostridiaceae1.id.1869	rs881532	22	47806774	0.00140577	20.0576	A	G	-0.0533035	0.0119011	7.9e-06	14250	A	G	-0.0203	0.0158	0.199	218792
family.ClostridialesvadinBB60group.id.11286	rs10517600	4	155632958	0.00192177	20.2367	T	G	0.0626993	0.0139364	6.83e-06	10512	T	G	0.0195	0.0163	0.2329	218792
family.ClostridialesvadinBB60group.id.11286	rs10904722	10	6714424	0.0019826	20.8785	C	T	-0.0672314	0.0147123	5.05e-06	10512	C	T	0.0368	0.0185	0.04735	218792
family.ClostridialesvadinBB60group.id.11286	rs118104867	8	123977538	0.00539382	22.1966	C	T	0.214464	0.0455098	3.44e-06	4095	C	T	0.0225	0.0313	0.472799	218792
family.ClostridialesvadinBB60group.id.11286	rs13409132	2	205616346	0.00371773	22.0575	A	G	-0.165419	0.0352154	4.37e-06	5913	A	G	-0.0526	0.0427	0.2173	218792
family.ClostridialesvadinBB60group.id.11286	rs17121075	14	85856796	0.00189407	19.9444	G	A	0.0769254	0.0172234	7.91e-06	10512	G	A	-0.001	0.0194	0.9599	218792
family.ClostridialesvadinBB60group.id.11286	rs2191834	2	229942951	0.00208845	21.9935	G	T	0.0746375	0.0159136	2.5e-06	10511	G	T	0.0015	0.0186	0.9377	218792
family.ClostridialesvadinBB60group.id.11286	rs28691777	17	58149405	0.00257988	26.375	C	T	0.137134	0.0266996	6.96e-07	10199	C	T	0.0154	0.0388	0.692	218792
family.ClostridialesvadinBB60group.id.11286	rs34088226	5	4308946	0.00196662	19.1414	A	G	-0.117807	0.026924	7.66e-06	9716	A	G	0.0172	0.0342	0.6151	218792
family.ClostridialesvadinBB60group.id.11286	rs55682560	15	87392290	0.00275079	25.3247	C	T	-0.131519	0.0261319	4.97e-07	9183	C	T	-0.0137	0.0297	0.6451	218792
family.ClostridialesvadinBB60group.id.11286	rs6588624	1	56849539	0.00218181	22.981	G	A	-0.0662317	0.0138147	1.79e-06	10512	G	A	-0.0121	0.0159	0.4467	218792
family.ClostridialesvadinBB60group.id.11286	rs66714985	8	3305122	0.00203599	21.442	A	C	0.116908	0.0252447	4.85e-06	10512	A	C	-0.016	0.0263	0.541499	218792
family.ClostridialesvadinBB60group.id.11286	rs6755871	2	202450739	0.00185445	19.5042	C	G	-0.0613825	0.0138976	9.33e-06	10500	C	G	-0.0204	0.0159	0.1982	218792
family.ClostridialesvadinBB60group.id.11286	rs7226487	18	74373125	0.00204595	21.5327	A	G	-0.0643682	0.0138701	3.58e-06	10505	A	G	-0.0091	0.0158	0.5654	218792
family.ClostridialesvadinBB60group.id.11286	rs7538034	1	71391694	0.00214733	22.419	T	G	-0.078598	0.0165982	2.37e-06	10420	T	G	0.0316	0.0215	0.1405	218792
family.ClostridialesvadinBB60group.id.11286	rs7725895	5	142244898	0.00221916	23.3753	A	G	-0.116224	0.0240367	3.94e-06	10512	A	G	-0.0053	0.0245	0.8283	218792
family.ClostridialesvadinBB60group.id.11286	rs989682	3	15564453	0.00201121	20.4086	A	G	0.070194	0.0155364	6.85e-06	10129	A	G	0.0085	0.0188	0.6513	218792
family.ClostridialesvadinBB60group.id.11286	rs9979874	21	38612024	0.00227682	23.9703	G	C	-0.0738925	0.0150911	1.05e-06	10506	G	C	-0.0521	0.0169	0.00211398	218792
family.Coriobacteriaceae.id.811	rs11250875	10	1922731	0.00121534	21.5232	T	C	0.06075	0.0130939	4.83e-06	17690	T	C	-0.0034	0.0193	0.8593	218792
family.Coriobacteriaceae.id.811	rs11656361	17	8121332	0.0011624	19.3915	A	C	0.0773006	0.017553	8.02e-06	16665	A	C	-0.0298	0.0206	0.1479	218792
family.Coriobacteriaceae.id.811	rs12974142	19	52895166	0.00113949	19.8623	G	A	0.0789796	0.0177205	8.51e-06	17413	G	A	0.0067	0.0311	0.8302	218792
family.Coriobacteriaceae.id.811	rs13307134	7	105084680	0.00114388	20.0695	C	T	0.0565686	0.0126265	7.8e-06	17527	C	T	-0.0425	0.0213	0.0464205	218792
family.Coriobacteriaceae.id.811	rs1397793	5	90471451	0.00112166	19.6792	G	A	-0.0498855	0.0112446	9.77e-06	17527	G	A	0.0021	0.0174	0.9043	218792
family.Coriobacteriaceae.id.811	rs1816223	12	11494021	0.00116623	20.65	A	G	-0.0586265	0.0129006	4.84e-06	17688	A	G	-0.0133	0.0198	0.5031	218792
family.Coriobacteriaceae.id.811	rs240104	1	176571431	0.0012858	22.6271	T	C	-0.0603429	0.0126849	1.52e-06	17577	T	C	-0.0116	0.0177	0.5129	218792
family.Coriobacteriaceae.id.811	rs2442778	3	11654412	0.00150249	20.2689	G	A	-0.116408	0.0258545	9.03e-06	13472	G	A	0.01	0.036	0.7812	218792
family.Coriobacteriaceae.id.811	rs3025411	9	136512906	0.00124698	19.5632	A	G	0.0926543	0.0209468	8.27e-06	15671	A	G	0.0642	0.026	0.0133801	218792
family.Coriobacteriaceae.id.811	rs34739816	17	37376685	0.00129972	21.5917	G	T	0.0965017	0.0207666	3.88e-06	16593	G	T	-0.0364	0.034	0.2834	218792
family.Coriobacteriaceae.id.811	rs62448869	7	24464799	0.00113362	19.8892	T	A	-0.0486059	0.0108982	7.87e-06	17527	T	A	0.0018	0.016	0.9098	218792
family.Coriobacteriaceae.id.811	rs67561917	20	62072077	0.00123808	21.4838	A	G	-0.0714367	0.0154113	5.39e-06	17333	A	G	0.0047	0.0206	0.8205	218792
family.Coriobacteriaceae.id.811	rs719099	10	65799217	0.00140904	24.954	A	G	0.0778402	0.0155815	5.43e-07	17687	A	G	0.0006	0.0266	0.9825	218792
family.Coriobacteriaceae.id.811	rs76779974	5	125460084	0.0012364	20.3231	C	G	0.0774888	0.0171877	5.63e-06	16419	C	G	-0.0237	0.0273	0.387	218792
family.Coriobacteriaceae.id.811	rs80046645	5	459415	0.00642656	20.7109	C	G	0.25584	0.0561995	4.66e-06	3204	C	G	-0.0396	0.0412	0.3366	218792
family.Coriobacteriaceae.id.811	rs8010111	14	39660509	0.00126919	20.3253	G	A	-0.103377	0.0229286	6.9e-06	15996	G	A	0.0058	0.0288	0.8408	218792
family.Defluviitaleaceae.id.1924	rs112893842	9	8786663	0.00275798	22.6807	T	C	0.110761	0.0232545	2.75e-06	8203	T	C	0.0189	0.0278	0.4972	218792
family.Defluviitaleaceae.id.1924	rs1582238	1	118723685	0.00287123	23.036	T	C	0.0801923	0.0167061	1.69e-06	8002	T	C	-0.0295	0.0166	0.07486	218792
family.Defluviitaleaceae.id.1924	rs17051335	4	122202910	0.002624	21.1235	C	T	-0.134314	0.0292201	4.58e-06	8031	C	T	-0.002	0.0262	0.9401	218792
family.Defluviitaleaceae.id.1924	rs1908593	18	59026148	0.00244532	20.1032	T	C	0.070223	0.0156601	7.86e-06	8203	T	C	-0.008	0.0162	0.6187	218792
family.Defluviitaleaceae.id.1924	rs28696126	7	79734541	0.00257611	20.2179	A	T	-0.107106	0.0238173	5.56e-06	7830	A	T	-0.0129	0.0237	0.5875	218792
family.Defluviitaleaceae.id.1924	rs4344384	10	66407366	0.00250741	20.6074	G	T	0.0708803	0.0156121	5.86e-06	8200	G	T	0.0095	0.0159	0.5482	218792
family.Defluviitaleaceae.id.1924	rs4677103	3	72207794	0.00306452	24.5915	A	G	0.0977203	0.0197033	9.42e-07	8002	A	G	0.0094	0.021	0.653	218792
family.Defluviitaleaceae.id.1924	rs540220	9	93331308	0.00231399	18.2881	T	C	-0.123954	0.0289814	9.48e-06	7887	T	C	0.0356	0.0278	0.2009	218792
family.Defluviitaleaceae.id.1924	rs55658617	21	41811003	0.003584	24.0056	T	C	0.177314	0.0361844	1.41e-06	6676	T	C	-0.0132	0.0434	0.760699	218792
family.Defluviitaleaceae.id.1924	rs72731813	4	147414743	0.00333434	26.0414	C	T	-0.149751	0.0293415	2.76e-07	7786	C	T	0.0446	0.037	0.2281	218792
family.Defluviitaleaceae.id.1924	rs9608282	22	24804081	0.00277846	21.5484	T	G	0.139014	0.0299429	4.61e-06	7736	T	G	0.0281	0.0445	0.5274	218792
family.Defluviitaleaceae.id.1924	rs9725395	1	85205632	0.00272807	21.9636	A	G	-0.138357	0.0295185	3.41e-06	8031	A	G	0.0141	0.025	0.5729	218792
family.Desulfovibrionaceae.id.3169	rs112381107	9	15271933	0.00478262	21.3994	C	T	0.211435	0.0456962	2.82e-06	4455	C	T	-0.0319	0.0334	0.3403	218792
family.Desulfovibrionaceae.id.3169	rs11599763	10	11855599	0.00147635	22.385	T	C	-0.0555931	0.0117493	2.5e-06	15142	T	C	0.0072	0.0163	0.656401	218792
family.Desulfovibrionaceae.id.3169	rs16851319	1	203308383	0.0015547	23.553	G	C	-0.0732697	0.0150964	2.4e-06	15128	G	C	-0.0332	0.0211	0.1146	218792
family.Desulfovibrionaceae.id.3169	rs17791387	9	81834426	0.00148092	22.3106	A	G	-0.0729251	0.0154381	2.1e-06	15045	A	G	-0.0259	0.0271	0.34	218792
family.Desulfovibrionaceae.id.3169	rs2692012	1	203994218	0.00154915	20.2913	A	G	0.114231	0.0253568	1.56e-06	13080	A	G	-0.0901	0.0349	0.00978295	218792
family.Desulfovibrionaceae.id.3169	rs2838334	21	45064961	0.0013953	21.1544	G	A	0.0571419	0.012423	3.82e-06	15142	G	A	-0.0133	0.0167	0.426	218792
family.Desulfovibrionaceae.id.3169	rs3935584	2	233929283	0.0013611	20.6324	C	T	-0.0525838	0.0115757	6.78e-06	15140	C	T	-0.0091	0.0159	0.5667	218792
family.Desulfovibrionaceae.id.3169	rs4506934	17	2856662	0.00145749	21.9424	C	T	-0.0943381	0.020138	3.16e-06	15035	C	T	-0.0174	0.0247	0.481	218792
family.Desulfovibrionaceae.id.3169	rs6058181	20	33694801	0.00167245	25.2494	C	T	0.0834742	0.0166111	2.7e-07	15074	C	T	0.1177	0.0215	4.68598e-08	218792
family.Desulfovibrionaceae.id.3169	rs7164160	15	96159374	0.00129848	19.6846	A	T	-0.0574455	0.0129468	7.34e-06	15142	A	T	-0.0192	0.0207	0.3521	218792
family.Desulfovibrionaceae.id.3169	rs72647048	8	57865378	0.00133931	20.3043	T	C	-0.0770089	0.017089	9.61e-06	15142	T	C	-0.0486	0.0251	0.0530603	218792
family.Desulfovibrionaceae.id.3169	rs9928243	16	71541641	0.00139437	21.1389	C	A	-0.0541732	0.0117819	4.48e-06	15141	C	A	0.006	0.0159	0.7065	218792
family.Enterobacteriaceae.id.3469	rs11026530	11	22379097	0.00144179	19.4678	T	C	0.0822408	0.0186379	9.43e-06	13485	T	C	0.0218	0.0224	0.3309	218792
family.Enterobacteriaceae.id.3469	rs111229068	11	2563450	0.00169114	20.9176	A	T	0.110561	0.0241719	3.65e-06	12350	A	T	0.0193	0.0295	0.5129	218792
family.Enterobacteriaceae.id.3469	rs2374342	2	42133542	0.00156913	21.3345	C	A	0.0582927	0.0126195	4.52e-06	13577	C	A	-0.0268	0.0161	0.09681	218792
family.Enterobacteriaceae.id.3469	rs35673018	16	54327745	0.00147261	19.65	G	A	0.0899642	0.0202934	7.63e-06	13326	G	A	0.0467	0.0277	0.0923889	218792
family.Enterobacteriaceae.id.3469	rs4792380	17	13521040	0.00157431	20.1215	A	T	0.115598	0.0257683	9.49e-06	12763	A	T	-0.038	0.0467	0.4161	218792
family.Enterobacteriaceae.id.3469	rs504442	18	55145547	0.00145082	19.7249	T	G	0.084159	0.0189479	5.17e-06	13578	T	G	-0.0151	0.026	0.5616	218792
family.Enterobacteriaceae.id.3469	rs61973590	14	27718039	0.00150869	20.5008	C	G	-0.0605392	0.0133696	8.54e-06	13570	C	G	0.0171	0.0167	0.3048	218792
family.Enterobacteriaceae.id.3469	rs62210023	20	55340092	0.00160616	21.739	A	G	0.0606754	0.0130125	3.13e-06	13515	A	G	0.0069	0.0167	0.6804	218792
family.Enterobacteriaceae.id.3469	rs78143293	18	57672335	0.00182336	24.7882	A	G	-0.0848521	0.0170415	1.2e-06	13572	A	G	-0.0142	0.0242	0.5583	218792
family.Enterobacteriaceae.id.3469	rs79757635	13	110840418	0.00145957	19.6117	C	A	0.0758597	0.0171286	9.32e-06	13419	C	A	-0.0116	0.0236	0.621999	218792
family.Enterobacteriaceae.id.3469	rs80319214	2	4015933	0.00166229	21.0446	C	G	0.0990404	0.0215877	6.95e-06	12641	C	G	0.0055	0.0307	0.8584	218792
family.Erysipelotrichaceae.id.2149	rs1074800	5	3002546	0.00114877	20.4567	A	G	0.0492438	0.010887	6.15e-06	17789	A	G	0.0031	0.0161	0.8482	218792
family.Erysipelotrichaceae.id.2149	rs10781552	10	133897233	0.00127068	22.6304	C	T	-0.0552212	0.0116074	2.33e-06	17789	C	T	-0.0035	0.0177	0.8447	218792
family.Erysipelotrichaceae.id.2149	rs17530232	13	40385457	0.00126433	21.0397	A	G	0.10305	0.0224648	2.79e-06	16622	A	G	0.0299	0.0356	0.4014	218792
family.Erysipelotrichaceae.id.2149	rs1884466	1	64139196	0.00108423	19.7576	C	T	-0.0475363	0.0106939	9.53e-06	18205	C	T	-0.0052	0.0159	0.743599	218792
family.Erysipelotrichaceae.id.2149	rs2300774	3	195793712	0.00132092	24.0911	G	A	0.0524152	0.0106784	8.95e-07	18216	G	A	-0.0043	0.016	0.7863	218792
family.Erysipelotrichaceae.id.2149	rs290833	1	97457427	0.0011198	19.9402	T	G	-0.0497374	0.0111376	8.03e-06	17789	T	G	0.0057	0.016	0.721099	218792
family.Erysipelotrichaceae.id.2149	rs35161940	17	70327224	0.00126771	23.1157	T	C	-0.0806041	0.0167641	1.85e-06	18213	T	C	0.0222	0.0258	0.3892	218792
family.Erysipelotrichaceae.id.2149	rs4078432	14	48997206	0.00116359	20.7209	C	T	-0.0608929	0.0133764	4.23e-06	17789	C	T	0.0214	0.0211	0.3097	218792
family.Erysipelotrichaceae.id.2149	rs56970041	14	80357610	0.001063	19.3832	T	G	0.0724144	0.0164471	5.4e-06	18217	T	G	0.0098	0.0331	0.767901	218792
family.Erysipelotrichaceae.id.2149	rs62504403	8	38803551	0.00166794	28.3673	C	T	0.0681159	0.0127883	1.12e-07	16981	C	T	-0.0154	0.0201	0.4438	218792
family.Erysipelotrichaceae.id.2149	rs7234058	18	5830507	0.00140515	23.741	T	C	-0.0945759	0.0194091	9.12e-07	16874	T	C	0.058	0.0276	0.0355402	218792
family.Erysipelotrichaceae.id.2149	rs7826267	8	2954952	0.00100859	17.753	T	G	-0.0839071	0.0199131	9.28e-06	17586	T	G	-0.0261	0.0324	0.4212	218792
family.Erysipelotrichaceae.id.2149	rs8003149	14	56156504	0.00116526	21.2454	C	T	0.0538798	0.0116888	4.08e-06	18213	C	T	-0.0023	0.0168	0.8901	218792
family.FamilyXI.id.1936	rs10759623	9	115821485	0.00799161	25.4086	C	T	-0.162115	0.032151	5.78e-07	3156	C	T	0.0087	0.019	0.6477	218792
family.FamilyXI.id.1936	rs11547158	7	148921732	0.00719197	22.6812	A	G	-0.177599	0.0372795	2.7e-06	3133	A	G	-0.0062	0.0233	0.7895	218792
family.FamilyXI.id.1936	rs17379710	11	35334668	0.00670644	21.2949	T	C	-0.116383	0.0252125	3.97e-06	3156	T	C	0.0185	0.0161	0.2512	218792
family.FamilyXI.id.1936	rs2155352	11	95357209	0.00780986	24.7789	A	G	-0.150538	0.0302319	6.63e-07	3150	A	G	0.0177	0.0187	0.3437	218792
family.FamilyXI.id.1936	rs2156611	18	43345864	0.00632058	20.0555	T	C	-0.112486	0.0251099	9.43e-06	3155	T	C	-0.0117	0.0158	0.462	218792
family.FamilyXI.id.1936	rs3733511	4	119955787	0.00685865	21.7816	A	G	0.128253	0.0274718	3.39e-06	3156	A	G	0.0291	0.0174	0.0939291	218792
family.FamilyXI.id.1936	rs488164	1	239995451	0.00674544	21.3721	T	G	0.117998	0.025516	4.8e-06	3149	T	G	-0.0297	0.0166	0.0734801	218792
family.FamilyXI.id.1936	rs6025153	20	55348292	0.00650767	20.4893	G	C	0.118619	0.0261969	7.07e-06	3130	G	C	0.0058	0.0163	0.7229	218792
family.FamilyXI.id.1936	rs697771	16	54115200	0.00689836	21.8808	A	G	-0.117677	0.0251491	3.19e-06	3152	A	G	0.0003	0.0159	0.9825	218792
family.FamilyXI.id.1936	rs78222136	16	64956642	0.00611929	19.2959	G	C	0.224835	0.0511672	8.41e-06	3136	G	C	-0.0133	0.028	0.6359	218792
family.FamilyXIII.id.1957	rs10404377	19	16174657	0.0012469	20.3086	C	A	-0.0503183	0.011165	6.99e-06	16269	C	A	0.0064	0.0163	0.696899	218792
family.FamilyXIII.id.1957	rs118170811	10	102366896	0.00236457	22.8556	A	G	0.151619	0.0317112	1.8e-06	9645	A	G	-0.011	0.0457	0.8103	218792
family.FamilyXIII.id.1957	rs12643275	4	162213833	0.00137322	22.369	A	T	-0.0550907	0.0116474	2.42e-06	16269	A	T	0.0269	0.0173	0.1187	218792
family.FamilyXIII.id.1957	rs12904405	15	94106719	0.00117306	19.5438	A	G	-0.0851896	0.0192688	7.67e-06	16643	A	G	0.0062	0.0271	0.8202	218792
family.FamilyXIII.id.1957	rs1999289	21	19685992	0.00128572	20.9417	A	T	-0.0637366	0.013927	2.54e-06	16269	A	T	0.0171	0.019	0.3683	218792
family.FamilyXIII.id.1957	rs3098182	15	50828815	0.00127243	21.3136	G	T	0.0508511	0.011014	4.04e-06	16731	G	T	-0.0204	0.0159	0.1978	218792
family.FamilyXIII.id.1957	rs482905	1	166557202	0.00131293	22.0008	G	T	0.0596528	0.012717	3.72e-06	16737	G	T	-0.0283	0.0183	0.1222	218792
family.FamilyXIII.id.1957	rs6501525	17	70218627	0.00144871	23.6003	A	G	0.0561559	0.0115587	1.24e-06	16269	A	G	-0.0172	0.0168	0.3075	218792
family.FamilyXIII.id.1957	rs66753613	1	39212021	0.00125083	20.3728	G	A	0.0651136	0.0144251	8.08e-06	16269	G	A	0.0159	0.0206	0.4415	218792
family.FamilyXIII.id.1957	rs6797051	3	88995218	0.00131996	22.1188	C	T	-0.0805984	0.0171364	4.89e-06	16737	C	T	-0.0145	0.027	0.591199	218792
family.FamilyXIII.id.1957	rs7076829	10	7906746	0.00129771	21.1373	T	A	-0.0516394	0.0112313	4.76e-06	16269	T	A	0.018	0.0166	0.2767	218792
family.FamilyXIII.id.1957	rs7514702	1	186914023	0.0013086	21.9281	T	C	-0.0663236	0.0141626	3.92e-06	16737	T	C	-0.0126	0.0222	0.5713	218792
family.Lachnospiraceae.id.1987	rs10402491	19	13425799	0.00108165	19.8503	C	T	0.0661701	0.014851	7.58e-06	18334	C	T	0.0086	0.0212	0.685001	218792
family.Lachnospiraceae.id.1987	rs11139361	9	72179847	0.00109096	20.0202	T	C	0.0494463	0.0110503	4.26e-06	18333	T	C	0.0033	0.0169	0.8439	218792
family.Lachnospiraceae.id.1987	rs112040820	17	80469064	0.00125655	22.0298	A	G	0.0549584	0.0117086	2.42e-06	17512	A	G	-0.0153	0.0181	0.3993	218792
family.Lachnospiraceae.id.1987	rs11755180	6	161957425	0.00119991	22.0221	C	G	-0.049227	0.0104894	2.69e-06	18333	C	G	0.0013	0.016	0.9372	218792
family.Lachnospiraceae.id.1987	rs11841382	13	38004672	0.000921335	16.911	G	T	-0.0718128	0.017462	9.58e-06	18340	G	T	0.0258	0.0286	0.3675	218792
family.Lachnospiraceae.id.1987	rs11979110	7	130436459	0.00123789	22.7274	T	C	-0.0500924	0.0105069	1.82e-06	18339	T	C	0.0448	0.0159	0.00478399	218792
family.Lachnospiraceae.id.1987	rs1205443	20	36876868	0.00112291	19.9844	A	G	0.0501415	0.0112157	7.29e-06	17779	A	G	0.0018	0.0167	0.9133	218792
family.Lachnospiraceae.id.1987	rs12760724	1	214031969	0.00109777	20.1531	A	C	-0.0484566	0.0107934	7.27e-06	18340	A	C	-0.0277	0.0169	0.1017	218792
family.Lachnospiraceae.id.1987	rs13005175	2	232469722	0.00122348	20.6911	A	G	0.0993483	0.0218395	8.37e-06	16893	A	G	-0.0446	0.0385	0.2466	218792
family.Lachnospiraceae.id.1987	rs2159863	4	10245354	0.00112775	20.7041	A	G	-0.0585831	0.0128742	3.7e-06	18340	A	G	0.0069	0.0206	0.7364	218792
family.Lachnospiraceae.id.1987	rs2910921	5	32348593	0.00304674	20.008	T	C	0.160302	0.035832	8.42e-06	6549	T	C	0.0012	0.0474	0.9804	218792
family.Lachnospiraceae.id.1987	rs3127230	10	103392503	0.00109697	20.1384	C	T	-0.0503537	0.0112201	6.2e-06	18340	C	T	-0.0001	0.0173	0.9967	218792
family.Lachnospiraceae.id.1987	rs35524804	9	100113683	0.00131619	23.5342	T	C	-0.0607481	0.0125216	2.45e-06	17859	T	C	0.0027	0.0194	0.8903	218792
family.Lachnospiraceae.id.1987	rs7359994	19	29408858	0.0010898	20.0065	T	C	-0.0503142	0.0112482	5.36e-06	18340	T	C	-0.0046	0.0162	0.7769	218792
family.Lachnospiraceae.id.1987	rs79086868	9	133791605	0.00127119	22.2996	T	C	0.0776723	0.0164472	3.01e-06	17522	T	C	-0.0456	0.0264	0.0843102	218792
family.Lachnospiraceae.id.1987	rs959845	4	186906801	0.00117287	20.9686	C	T	-0.0493666	0.0107801	5.17e-06	17859	C	T	-0.0166	0.0164	0.3087	218792
family.Lachnospiraceae.id.1987	rs9929145	16	76559184	0.00165376	26.2786	G	A	-0.125721	0.0245233	2.84e-07	15866	G	A	-0.0035	0.0366	0.9233	218792
family.Lactobacillaceae.id.1836	rs1530559	2	135755629	0.00281615	19.057	G	A	0.0772453	0.0176921	9.65e-06	6750	G	A	-0.017	0.0161	0.2908	218792
family.Lactobacillaceae.id.1836	rs1590596	13	23836941	0.00328374	22.2317	C	G	-0.10381	0.0220135	3.9e-06	6750	C	G	0.0138	0.0219	0.5266	218792
family.Lactobacillaceae.id.1836	rs16861661	1	18501459	0.00479934	25.9595	G	A	-0.193287	0.0379293	2.7e-07	5385	G	A	-0.0419	0.0323	0.1944	218792
family.Lactobacillaceae.id.1836	rs328312	16	73890910	0.00340175	24.0608	T	A	0.082529	0.0168225	8.69e-07	7051	T	A	-0.0116	0.0159	0.4675	218792
family.Lactobacillaceae.id.1836	rs6092149	20	54192992	0.00334444	23.5031	A	T	-0.0825646	0.0170282	1.38e-06	7006	A	T	0.003	0.0161	0.8533	218792
family.Lactobacillaceae.id.1836	rs62314653	4	109896462	0.00337601	20.3721	C	A	0.177082	0.0392269	6.59e-06	6016	C	A	0.009	0.0338	0.7896	218792
family.Lactobacillaceae.id.1836	rs74599091	1	179720669	0.00408808	20.315	A	G	0.191613	0.0425039	7.7e-06	4951	A	G	0.0465	0.059	0.4302	218792
family.Lactobacillaceae.id.1836	rs768253	8	69010103	0.00304635	21.5638	T	G	-0.0792344	0.0170604	3.61e-06	7059	T	G	0.0097	0.0159	0.5419	218792
family.Lactobacillaceae.id.1836	rs77478751	3	173151665	0.00574984	21.409	A	G	-0.219178	0.0473566	5.96e-06	3704	A	G	-0.0167	0.0248	0.5011	218792
family.Lactobacillaceae.id.1836	rs921925	19	6928017	0.00346941	24.5479	A	C	0.0999419	0.0201687	5.77e-07	7053	A	C	-0.0299	0.0193	0.1218	218792
family.Lactobacillaceae.id.1836	rs9345899	6	67559323	0.00298621	19.768	A	G	-0.124042	0.0278946	9.45e-06	6602	A	G	-0.0112	0.0259	0.663901	218792
family.Methanobacteriaceae.id.121	rs10202904	2	125440268	0.00719054	26.747	T	G	-0.121754	0.0235357	3.01e-07	3695	T	G	-0.0219	0.0162	0.1755	218792
family.Methanobacteriaceae.id.121	rs10424197	19	46439321	0.00543557	20.1997	G	A	-0.111274	0.0247517	9.28e-06	3698	G	A	0.0055	0.0183	0.7659	218792
family.Methanobacteriaceae.id.121	rs11018665	11	89349287	0.00532506	19.7868	A	T	0.111465	0.0250516	6.52e-06	3698	A	T	0.012	0.0185	0.517201	218792
family.Methanobacteriaceae.id.121	rs12825290	12	43701132	0.00610007	19.2841	C	G	-0.216781	0.0493496	6.08e-06	3144	C	G	0.056	0.0332	0.091829	218792
family.Methanobacteriaceae.id.121	rs4257531	3	2086167	0.00638397	20.303	G	A	0.164498	0.0364959	7.44e-06	3162	G	A	0.0399	0.0261	0.1267	218792
family.Methanobacteriaceae.id.121	rs56131665	5	178175507	0.00575311	20.6574	G	A	0.178661	0.039298	6.18e-06	3572	G	A	0.0332	0.0257	0.1964	218792
family.Methanobacteriaceae.id.121	rs62241835	3	15019689	0.00695183	23.6687	G	T	-0.203385	0.0417931	1.63e-06	3383	G	T	0.0226	0.056	0.6868	218792
family.Methanobacteriaceae.id.121	rs6508769	19	28827760	0.00594705	19.8444	T	C	0.153519	0.0344519	8.23e-06	3319	T	C	0.0036	0.0224	0.8711	218792
family.Methanobacteriaceae.id.121	rs73068003	7	10773932	0.0054432	20.1953	G	T	-0.15814	0.0351803	8.45e-06	3692	G	T	0.0066	0.0269	0.8057	218792
family.Methanobacteriaceae.id.121	rs73457410	13	41956181	0.0069034	24.3021	A	G	0.21534	0.0436695	1.41e-06	3498	A	G	0.0405	0.0325	0.2127	218792
family.Methanobacteriaceae.id.121	rs75208022	12	21338861	0.00673465	21.7038	C	T	-0.227245	0.048763	5.92e-06	3203	C	T	0.0019	0.0272	0.9431	218792
family.Methanobacteriaceae.id.121	rs894996	4	104418307	0.00647634	23.3364	C	A	0.216999	0.0449076	1.88e-06	3582	C	A	-0.0029	0.031	0.9254	218792
family.Oxalobacteraceae.id.2966	rs111966731	15	93941937	0.00475314	20.9421	T	C	0.204031	0.0445746	4.56e-06	4387	T	C	-0.0359	0.0282	0.202	218792
family.Oxalobacteraceae.id.2966	rs11246212	11	610277	0.00422097	21.7369	T	C	0.13607	0.0291797	4.51e-06	5130	T	C	0.0341	0.0229	0.1353	218792
family.Oxalobacteraceae.id.2966	rs12002250	9	19682558	0.0040899	19.4	A	C	0.196145	0.044523	5.53e-06	4726	A	C	0.0542	0.0392	0.1674	218792
family.Oxalobacteraceae.id.2966	rs12509763	4	84254259	0.00397855	20.4795	C	G	-0.16332	0.0360823	8.05e-06	5129	C	G	0.0221	0.0269	0.4127	218792
family.Oxalobacteraceae.id.2966	rs1569853	6	38550301	0.00492134	24.7037	T	C	-0.140043	0.0281704	7.45e-07	4997	T	C	0.0278	0.0243	0.2536	218792
family.Oxalobacteraceae.id.2966	rs17138946	16	5984558	0.00404296	19.3794	G	T	-0.189444	0.0430248	8.09e-06	4776	G	T	-0.0043	0.0317	0.8928	218792
family.Oxalobacteraceae.id.2966	rs36057338	4	189935314	0.00435887	20.734	G	T	0.181604	0.0398742	6.26e-06	4738	G	T	0.068	0.0444	0.1259	218792
family.Oxalobacteraceae.id.2966	rs4428215	3	171947435	0.0057366	29.8005	G	A	0.12561	0.0230053	4.88e-08	5167	G	A	0.0167	0.0182	0.3588	218792
family.Oxalobacteraceae.id.2966	rs561239	12	18793583	0.00396573	19.8558	A	G	0.105525	0.0236769	7.19e-06	4989	A	G	0.0176	0.0196	0.3694	218792
family.Oxalobacteraceae.id.2966	rs6000536	22	37421469	0.00463546	24.049	C	T	-0.118383	0.0241355	7.39e-07	5166	C	T	0.0077	0.0212	0.7154	218792
family.Oxalobacteraceae.id.2966	rs62435498	7	1794263	0.00427687	20.5227	C	A	0.181521	0.0400608	7.46e-06	4780	C	A	-0.0121	0.0263	0.645601	218792
family.Oxalobacteraceae.id.2966	rs736744	9	87514407	0.00533632	27.7099	C	T	0.105642	0.0200648	1.49e-07	5167	C	T	-0.0136	0.016	0.3955	218792
family.Oxalobacteraceae.id.2966	rs7993559	13	23443627	0.00418655	20.9661	C	A	0.0921059	0.0201114	5.04e-06	4989	C	A	0.0128	0.0161	0.4286	218792
family.Oxalobacteraceae.id.2966	rs80330081	4	67427392	0.00417702	19.5885	A	C	-0.18756	0.0423688	6.64e-06	4672	A	C	0.0377	0.026	0.1465	218792
family.Oxalobacteraceae.id.2966	rs934049	2	16056779	0.00425406	21.1433	G	A	0.109751	0.0238636	4.21e-06	4951	G	A	-0.0076	0.0196	0.6965	218792
family.Pasteurellaceae.id.3689	rs10840326	11	9951672	0.00251995	23.1208	C	G	-0.0717634	0.0149229	1.44e-06	9154	C	G	0.0121	0.0165	0.4654	218792
family.Pasteurellaceae.id.3689	rs10965428	9	22718481	0.00242411	21.5565	C	A	-0.119902	0.0258219	4.29e-06	8873	C	A	-0.0547	0.0345	0.1125	218792
family.Pasteurellaceae.id.3689	rs111582866	16	48742489	0.00228738	19.7486	G	A	-0.113957	0.0256403	7.07e-06	8616	G	A	-0.0143	0.0283	0.6131	218792
family.Pasteurellaceae.id.3689	rs12050685	15	73477482	0.00205559	19.3809	A	G	-0.0670948	0.015239	9.19e-06	9411	A	G	0.0274	0.0176	0.1193	218792
family.Pasteurellaceae.id.3689	rs12191680	6	129224488	0.00284783	26.8632	C	G	0.102214	0.0197189	3.05e-07	9408	C	G	-0.0224	0.0263	0.3946	218792
family.Pasteurellaceae.id.3689	rs16970009	17	32862601	0.00402952	19.0194	A	G	0.187381	0.0429572	7.32e-06	4703	A	G	0.0285	0.0566	0.6138	218792
family.Pasteurellaceae.id.3689	rs35510	12	115493337	0.00246831	21.4507	A	G	0.122729	0.0264958	4.02e-06	8671	A	G	-0.0133	0.0395	0.7358	218792
family.Pasteurellaceae.id.3689	rs4822728	22	26891808	0.00224269	21.1512	T	C	0.0685479	0.0149032	4.72e-06	9412	T	C	0.0175	0.0159	0.2697	218792
family.Pasteurellaceae.id.3689	rs6092684	20	57274077	0.00231886	21.7643	A	T	0.0684647	0.014674	3.44e-06	9366	A	T	0.0019	0.016	0.9066	218792
family.Pasteurellaceae.id.3689	rs62568866	9	6818307	0.00257817	20.7252	T	A	-0.118018	0.0259206	7.23e-06	8020	T	A	-0.0281	0.0257	0.2752	218792
family.Pasteurellaceae.id.3689	rs6972479	7	116918060	0.00230179	19.8733	A	G	-0.0781862	0.0175366	7.75e-06	8616	A	G	0.0116	0.0197	0.555199	218792
family.Pasteurellaceae.id.3689	rs72756943	5	26531908	0.00264982	21.3027	G	A	0.13988	0.0303029	3.35e-06	8020	G	A	0.0024	0.0321	0.9393	218792
family.Pasteurellaceae.id.3689	rs73139353	3	97972214	0.00518471	21.0815	A	C	-0.222573	0.0484634	8.71e-06	4047	A	C	-0.0269	0.0283	0.3411	218792
family.Pasteurellaceae.id.3689	rs731534	20	5412480	0.00227652	20.7932	C	G	-0.0986502	0.0216316	9.46e-06	9115	C	G	0.0355	0.0252	0.1591	218792
family.Pasteurellaceae.id.3689	rs76022354	10	94306385	0.00634087	23.5471	C	T	0.24289	0.0500406	1.83e-06	3692	C	T	-0.0019	0.0365	0.9594	218792
family.Pasteurellaceae.id.3689	rs78909003	9	105650242	0.00639517	23.4025	T	C	-0.241159	0.0498372	2.05e-06	3638	T	C	0.0403	0.035	0.2497	218792
family.Pasteurellaceae.id.3689	rs9382510	6	55448491	0.0028527	26.915	C	T	-0.0881865	0.0169965	2.48e-07	9410	C	T	0.0545	0.018	0.00241301	218792
family.Pasteurellaceae.id.3689	rs9895850	17	64535013	0.00388961	18.4892	T	C	-0.176406	0.041017	9.08e-06	4737	T	C	0.0651	0.0386	0.092151	218792
family.Pasteurellaceae.id.3689	rs9938097	16	84977389	0.00214481	20.2045	T	C	-0.0710386	0.0158024	8.23e-06	9402	T	C	-0.0005	0.0163	0.9739	218792
family.Peptococcaceae.id.2024	rs117452796	9	9423378	0.00692299	22.0222	A	G	-0.257982	0.0549569	3.15e-06	3161	A	G	-0.0231	0.0457	0.6134	218792
family.Peptococcaceae.id.2024	rs12144792	1	27418225	0.00193577	20.7839	C	T	0.064399	0.0141246	5.82e-06	10718	C	T	-0.0051	0.0164	0.755899	218792
family.Peptococcaceae.id.2024	rs12634826	3	182984048	0.00230955	24.0263	T	G	-0.0739885	0.0150931	1.01e-06	10381	T	G	0.0194	0.0166	0.2431	218792
family.Peptococcaceae.id.2024	rs12992764	2	188895743	0.00224521	23.4973	T	G	0.0684213	0.0141137	1.46e-06	10444	T	G	0.0048	0.0161	0.766399	218792
family.Peptococcaceae.id.2024	rs150600492	10	129175962	0.00224438	21.9521	A	C	0.135774	0.0289757	2.31e-06	9761	A	C	0.0512	0.0342	0.1342	218792
family.Peptococcaceae.id.2024	rs35703006	8	28614217	0.00227647	24.4435	G	T	0.0812655	0.0164355	4.95e-07	10715	G	T	0.0149	0.0184	0.4189	218792
family.Peptococcaceae.id.2024	rs4990837	8	3580757	0.00223332	23.9858	A	G	0.0910387	0.0185869	1.74e-06	10718	A	G	0.0036	0.02	0.8592	218792
family.Peptococcaceae.id.2024	rs75430375	5	89252884	0.00258574	21.7065	C	T	-0.147941	0.0317498	3.41e-06	8375	C	T	-0.0327	0.0381	0.3916	218792
family.Peptococcaceae.id.2024	rs75898026	13	113561082	0.00214242	22.4192	A	G	-0.0821779	0.0173541	2.02e-06	10444	A	G	-0.0001	0.0196	0.997	218792
family.Peptostreptococcaceae.id.2042	rs10805326	4	14324623	0.0013248	21.3031	G	A	0.0566637	0.012276	4.03e-06	16061	G	A	0.0051	0.0175	0.7706	218792
family.Peptostreptococcaceae.id.2042	rs10805326	4	14324623	0.0013248	21.3031	G	A	0.0566637	0.012276	4.03e-06	16061	A	C	-0.0678	0.1523	0.6562	218792
family.Peptostreptococcaceae.id.2042	rs117020988	7	46710977	0.0035052	24.0212	C	T	0.182411	0.0372126	1.03e-06	6831	C	T	-0.07	0.0293	0.0167598	218792
family.Peptostreptococcaceae.id.2042	rs12377846	9	16786784	0.00645175	24.2473	C	A	-0.252	0.0511627	7.26e-07	3736	C	A	0.0091	0.0475	0.8481	218792
family.Peptostreptococcaceae.id.2042	rs12986312	19	17414138	0.00128906	20.6103	T	G	0.0571818	0.0125947	5.77e-06	15970	T	G	0.048	0.0173	0.00550098	218792
family.Peptostreptococcaceae.id.2042	rs1467258	17	38216487	0.00128143	19.9929	G	A	0.072584	0.0162321	7.9e-06	15584	G	A	0.004	0.0205	0.8436	218792
family.Peptostreptococcaceae.id.2042	rs1520207	3	151781175	0.00135841	21.839	C	T	0.0525658	0.0112476	3.17e-06	16057	C	T	-0.0277	0.0159	0.0814404	218792
family.Peptostreptococcaceae.id.2042	rs2644627	8	26726641	0.00153947	24.7574	C	G	-0.0558506	0.011224	6.33e-07	16059	C	G	0.0178	0.0161	0.2663	218792
family.Peptostreptococcaceae.id.2042	rs4692811	4	171180190	0.0015911	25.5922	C	T	0.0642075	0.0126913	4.21e-07	16061	C	T	0.0137	0.0168	0.414	218792
family.Peptostreptococcaceae.id.2042	rs59865771	16	89246670	0.00126704	20.3466	C	T	-0.0573764	0.0127192	7.69e-06	16040	C	T	-0.0316	0.0168	0.0591902	218792
family.Peptostreptococcaceae.id.2042	rs61841503	10	17019559	0.00211481	32.4908	G	A	0.0919658	0.0161331	9.8e-09	15333	G	A	0.0241	0.0236	0.3075	218792
family.Peptostreptococcaceae.id.2042	rs6721459	2	67852836	0.00128903	20.7273	A	G	0.0509823	0.0111975	5.08e-06	16061	A	G	0.0048	0.0161	0.7637	218792
family.Peptostreptococcaceae.id.2042	rs75819860	18	65324280	0.00188866	22.1296	T	A	0.126264	0.0268383	2.49e-06	11697	T	A	0.0577	0.0256	0.0240503	218792
family.Peptostreptococcaceae.id.2042	rs76982728	7	44312824	0.00193203	21.6477	T	C	0.124203	0.0266923	3.24e-06	11185	T	C	-0.0496	0.0549	0.3662	218792
family.Peptostreptococcaceae.id.2042	rs77540684	10	14650535	0.00139689	18.8747	T	G	0.106725	0.0245638	8.14e-06	13495	T	G	0.0131	0.0269	0.626	218792
family.Peptostreptococcaceae.id.2042	rs9573937	13	77351196	0.00146469	23.556	A	G	-0.0693637	0.0142907	1.71e-06	16061	A	G	0.0101	0.0214	0.6381	218792
family.Prevotellaceae.id.960	rs10131942	14	78643095	0.00131729	19.6126	C	G	0.0701212	0.0158326	8.61e-06	14871	C	G	0.0258	0.0216	0.2311	218792
family.Prevotellaceae.id.960	rs12057990	1	99491816	0.00133601	19.8863	C	T	0.0589878	0.0132268	8.97e-06	14867	C	T	0.0069	0.0178	0.7001	218792
family.Prevotellaceae.id.960	rs12118202	1	210681370	0.00175056	26.0712	T	C	-0.0751986	0.0147265	5.54e-07	14869	T	C	0.0375	0.0205	0.0679094	218792
family.Prevotellaceae.id.960	rs13069367	3	71801830	0.0013668	20.3357	A	C	-0.0539768	0.0119687	7.39e-06	14860	A	C	-0.0297	0.0162	0.0659903	218792
family.Prevotellaceae.id.960	rs148376875	3	170126707	0.00155486	22.2489	T	G	0.084515	0.0179163	2.08e-06	14289	T	G	-0.0021	0.0222	0.9258	218792
family.Prevotellaceae.id.960	rs2206482	20	9771109	0.00158207	23.4612	T	G	-0.0569105	0.0117486	1.3e-06	14808	T	G	0.0064	0.0162	0.6917	218792
family.Prevotellaceae.id.960	rs2278540	3	32408916	0.00135989	20.215	G	A	0.0554249	0.0123265	8.44e-06	14847	G	A	-0.0035	0.0165	0.8316	218792
family.Prevotellaceae.id.960	rs34071565	11	119712522	0.0024876	20.2846	T	A	-0.1567	0.0347882	5.6e-06	8136	T	A	-0.0137	0.0328	0.677001	218792
family.Prevotellaceae.id.960	rs34660375	5	180283881	0.00142782	20.4284	A	G	-0.0805894	0.0178291	7.4e-06	14289	A	G	-0.0249	0.0226	0.2696	218792
family.Prevotellaceae.id.960	rs3758087	8	23714609	0.00137565	20.4827	T	C	0.0564199	0.0124655	8.61e-06	14871	T	C	0.0074	0.0177	0.6758	218792
family.Prevotellaceae.id.960	rs3860225	1	111161677	0.00167703	24.9776	A	G	0.083936	0.0167936	5.5e-07	14871	A	G	0.0618	0.0276	0.0249902	218792
family.Prevotellaceae.id.960	rs4493272	2	118910912	0.00176419	26.271	T	C	-0.0604992	0.0118027	3.02e-07	14867	T	C	-0.0171	0.0159	0.2819	218792
family.Prevotellaceae.id.960	rs4685827	3	4864877	0.00146684	21.8366	T	C	-0.0679529	0.0145407	2.77e-06	14867	T	C	-0.0007	0.0186	0.9711	218792
family.Prevotellaceae.id.960	rs7252711	19	17460999	0.0014377	20.9314	A	G	-0.0740876	0.0161926	5.57e-06	14540	A	G	-0.0556	0.0255	0.0292402	218792
family.Prevotellaceae.id.960	rs7975087	12	21404832	0.00132403	19.713	C	A	-0.0601448	0.0135454	7.59e-06	14871	C	A	0.0106	0.0209	0.612099	218792
family.Prevotellaceae.id.960	rs912860	14	33706908	0.00641915	22.4636	G	A	-0.229046	0.0483124	9.3e-07	3479	G	A	-0.0113	0.0524	0.8287	218792
family.Prevotellaceae.id.960	rs9586501	13	105075823	0.00145513	21.6634	G	A	0.0592681	0.0127329	2.59e-06	14868	G	A	0.0018	0.018	0.9222	218792
family.Prevotellaceae.id.960	rs9958960	18	63018983	0.00197074	27.7614	G	A	-0.0914807	0.0173611	1.06e-07	14061	G	A	0.0032	0.022	0.8851	218792
family.Rhodospirillaceae.id.2717	rs1035406	5	119372737	0.00240896	20.4797	G	A	-0.11354	0.0250863	5.84e-06	8483	G	A	-0.0102	0.0247	0.6788	218792
family.Rhodospirillaceae.id.2717	rs11591293	10	113419797	0.00257258	21.9182	G	T	0.0743184	0.0158724	2.67e-06	8500	G	T	0.0152	0.016	0.3433	218792
family.Rhodospirillaceae.id.2717	rs12977163	19	28641647	0.0024788	19.984	G	C	0.0730951	0.0163491	7.63e-06	8044	G	C	-0.0187	0.0163	0.2521	218792
family.Rhodospirillaceae.id.2717	rs13336560	16	88554243	0.00245457	19.7045	C	T	-0.0701719	0.0158061	9.17e-06	8010	C	T	0.0445	0.0163	0.00619199	218792
family.Rhodospirillaceae.id.2717	rs1549633	5	27945645	0.00260138	20.8862	A	C	0.0999312	0.0218634	4.7e-06	8010	A	C	0.0353	0.0248	0.1543	218792
family.Rhodospirillaceae.id.2717	rs1923415	6	89268715	0.00226769	19.3169	A	G	-0.0999238	0.0227326	9.64e-06	8501	A	G	-0.0022	0.028	0.9385	218792
family.Rhodospirillaceae.id.2717	rs3754624	2	225633812	0.00276714	23.5693	C	T	0.0971389	0.0200064	1.71e-06	8496	C	T	-0.0683	0.0208	0.000999793	218792
family.Rhodospirillaceae.id.2717	rs4278423	10	2670553	0.0024418	20.8037	T	C	0.107529	0.0235725	3.12e-06	8501	T	C	0.0136	0.033	0.6797	218792
family.Rhodospirillaceae.id.2717	rs4822789	22	27173098	0.00245826	20.9221	G	C	0.0734321	0.0160521	7.01e-06	8492	G	C	-0.0266	0.0163	0.1019	218792
family.Rhodospirillaceae.id.2717	rs55876211	3	84471266	0.00253147	21.5518	C	T	-0.0911851	0.0196395	2.87e-06	8494	C	T	0.0297	0.0182	0.1027	218792
family.Rhodospirillaceae.id.2717	rs61933850	12	73139398	0.00304823	20.877	G	A	0.164808	0.0360647	7.23e-06	6830	G	A	0.0269	0.0234	0.2512	218792
family.Rhodospirillaceae.id.2717	rs6679026	1	78619512	0.00233549	19.8864	T	C	0.111984	0.0251088	9.95e-06	8497	T	C	-0.0244	0.0262	0.3518	218792
family.Rhodospirillaceae.id.2717	rs7001029	8	131958403	0.00250129	20.1658	C	T	0.117366	0.0261324	5.35e-06	8044	C	T	0.0403	0.0276	0.1434	218792
family.Rhodospirillaceae.id.2717	rs72714493	1	92206218	0.00239679	20.4097	A	G	0.0816858	0.0180791	7.35e-06	8497	A	G	-0.0088	0.0222	0.6904	218792
family.Rhodospirillaceae.id.2717	rs74354280	4	134192918	0.00232432	19.8004	C	T	-0.0911896	0.0204907	6.67e-06	8501	C	T	-0.0055	0.0177	0.7563	218792
family.Rhodospirillaceae.id.2717	rs76784716	2	169033340	0.00266008	22.6603	A	G	0.136049	0.0285767	1.49e-06	8498	A	G	-0.0006	0.025	0.9818	218792
family.Rhodospirillaceae.id.2717	rs9813022	3	13726736	0.00311125	26.5156	A	G	-0.0842444	0.0163583	2.53e-07	8498	A	G	0.014	0.0164	0.3922	218792
family.Rikenellaceae.id.967	rs10217435	9	86052655	0.00113124	20.0195	C	T	-0.0883756	0.0197506	6.51e-06	17679	C	T	-0.0241	0.0229	0.2919	218792
family.Rikenellaceae.id.967	rs10832801	11	17589129	0.0011038	19.003	A	C	-0.0534763	0.0122666	7.5e-06	17199	A	C	0.0078	0.0177	0.6595	218792
family.Rikenellaceae.id.967	rs1939881	11	95304834	0.00150162	26.2157	G	A	-0.105589	0.0206213	5.64e-07	17434	G	A	0.0164	0.034	0.6305	218792
family.Rikenellaceae.id.967	rs2447496	8	99188924	0.00117872	20.2944	G	A	-0.0549203	0.0121904	6.09e-06	17199	G	A	0.0122	0.018	0.4968	218792
family.Rikenellaceae.id.967	rs2833282	21	32496710	0.0011596	20.5232	G	A	0.0711137	0.0156966	4.31e-06	17680	G	A	0.0284	0.0222	0.1994	218792
family.Rikenellaceae.id.967	rs35909684	8	144445222	0.0011204	19.6997	A	C	-0.0850181	0.0191539	7.1e-06	17565	A	C	0.0131	0.0304	0.6654	218792
family.Rikenellaceae.id.967	rs36021379	21	28515912	0.00119026	20.4932	A	G	-0.0656005	0.0144903	7.2e-06	17199	A	G	0.0332	0.0217	0.1265	218792
family.Rikenellaceae.id.967	rs4264350	15	71658642	0.0013291	23.5111	T	C	-0.0526393	0.0108555	1.35e-06	17668	T	C	0.0138	0.0159	0.3863	218792
family.Rikenellaceae.id.967	rs4783173	16	85396629	0.00112011	19.1574	C	G	0.0481514	0.0110006	7.06e-06	17086	C	G	0.004	0.0163	0.8043	218792
family.Rikenellaceae.id.967	rs59663348	18	4069710	0.00117774	20.8422	G	A	0.0570915	0.0125048	6.12e-06	17678	G	A	0.0146	0.0184	0.4283	218792
family.Rikenellaceae.id.967	rs62532512	9	14158854	0.00124587	22.042	C	A	-0.0504257	0.0107399	2.76e-06	17672	C	A	-0.0028	0.016	0.8639	218792
family.Rikenellaceae.id.967	rs6744030	2	174257127	0.00111859	19.6667	C	T	0.0696747	0.0157103	9.32e-06	17564	C	T	-0.0113	0.0195	0.5633	218792
family.Rikenellaceae.id.967	rs6837275	4	187842232	0.00133679	23.0195	A	G	0.0570355	0.011887	1.45e-06	17199	A	G	0.0144	0.0174	0.4077	218792
family.Rikenellaceae.id.967	rs74474130	14	90270821	0.00195925	21.6981	T	G	0.137747	0.0295688	3.61e-06	11055	T	G	-0.0407	0.0433	0.3482	218792
family.Rikenellaceae.id.967	rs77885767	14	21548634	0.00253568	21.5471	C	T	-0.156209	0.0336482	2.85e-06	8478	C	T	0.013	0.0376	0.7298	218792
family.Rikenellaceae.id.967	rs9389714	6	100244667	0.00111405	19.7161	C	T	-0.0636841	0.0143416	8.79e-06	17680	C	T	-0.0053	0.0279	0.85	218792
family.Rikenellaceae.id.967	rs9578457	13	22867356	0.00212996	20.0601	G	A	-0.141478	0.0315848	3.99e-06	9400	G	A	0.0094	0.037	0.7997	218792
family.Rikenellaceae.id.967	rs9603208	13	38044689	0.00149519	26.4715	G	T	0.0821173	0.0159596	1.92e-07	17680	G	T	0.0255	0.0263	0.3321	218792
family.Ruminococcaceae.id.2050	rs10093275	8	69732887	0.00114186	20.9576	C	T	0.0534595	0.011677	5.35e-06	18335	C	T	0.007	0.0169	0.6773	218792
family.Ruminococcaceae.id.2050	rs10166469	2	29829167	0.00107378	19.6843	T	C	-0.053336	0.0120209	8.52e-06	18314	T	C	-0.0197	0.0182	0.2789	218792
family.Ruminococcaceae.id.2050	rs1612733	1	107661606	0.00138737	20.8589	T	C	0.108708	0.0238006	4.22e-06	15016	T	C	0.0043	0.0351	0.9025	218792
family.Ruminococcaceae.id.2050	rs17376049	1	61425267	0.00132403	24.303	T	C	0.0848534	0.0172114	7.3e-07	18333	T	C	0.0114	0.0255	0.6549	218792
family.Ruminococcaceae.id.2050	rs2113833	2	218216801	0.00545343	22.69	T	C	0.169146	0.0355009	1.14e-06	4140	T	C	0.0367	0.0447	0.412	218792
family.Ruminococcaceae.id.2050	rs2426816	20	58278102	0.00115284	20.5118	T	A	-0.0480152	0.0106011	6.04e-06	17774	T	A	0.0259	0.0159	0.1035	218792
family.Ruminococcaceae.id.2050	rs3009418	1	147744468	0.00118641	19.4862	C	A	0.0927607	0.0210123	8.69e-06	16407	C	A	0.0097	0.0378	0.7974	218792
family.Ruminococcaceae.id.2050	rs499272	11	116485496	0.00108443	19.3802	G	C	0.0706431	0.016046	9.29e-06	17854	G	C	-0.0303	0.0238	0.2034	218792
family.Ruminococcaceae.id.2050	rs55793120	12	47384118	0.00216942	26.9658	T	C	0.13822	0.0266152	1.44e-07	12405	T	C	-0.0793	0.0335	0.0178698	218792
family.Ruminococcaceae.id.2050	rs56199908	9	2801371	0.00418044	23.5759	T	C	-0.199327	0.0410444	1.66e-06	5618	T	C	0.001	0.0354	0.9785	218792
family.Ruminococcaceae.id.2050	rs76724913	1	24473669	0.00112238	19.6794	T	G	0.0901053	0.0203104	9.6e-06	17516	T	G	-0.0013	0.0269	0.9622	218792
family.Streptococcaceae.id.1850	rs10028567	4	53657577	0.00145291	24.0763	C	T	-0.0934027	0.0190343	3.72e-06	16549	C	T	0.034	0.0244	0.164	218792
family.Streptococcaceae.id.1850	rs11110281	12	100584014	0.00217516	33.3831	T	C	-0.130554	0.0225943	1.4e-08	15316	T	C	-0.0161	0.0368	0.661899	218792
family.Streptococcaceae.id.1850	rs16950051	12	120729505	0.00141098	20.3878	A	G	0.107008	0.0236973	5.34e-06	14431	A	G	0.0298	0.0322	0.3544	218792
family.Streptococcaceae.id.1850	rs2370083	14	97526750	0.00126156	20.8597	G	T	-0.0842751	0.0184509	4.26e-06	16516	G	T	-0.0387	0.0324	0.2317	218792
family.Streptococcaceae.id.1850	rs2952251	8	10143164	0.0015345	25.5272	A	G	-0.0639298	0.0126525	3.72e-07	16612	A	G	-0.0162	0.0206	0.4309	218792
family.Streptococcaceae.id.1850	rs35344081	16	991253	0.00132592	22.0688	G	A	0.0609349	0.0129703	2.64e-06	16624	G	A	0.0027	0.018	0.8818	218792
family.Streptococcaceae.id.1850	rs395407	5	169689604	0.00142553	22.9639	G	C	-0.0826855	0.0172536	1.33e-06	16088	G	C	0.0461	0.0221	0.0366598	218792
family.Streptococcaceae.id.1850	rs4968759	17	61363540	0.00143591	23.9021	A	G	-0.0544035	0.0111271	8.92e-07	16624	A	G	0.0121	0.0158	0.4441	218792
family.Streptococcaceae.id.1850	rs57646748	4	37452858	0.00121213	19.6093	G	A	-0.088021	0.019876	7.88e-06	16160	G	A	0.0926	0.041	0.0237498	218792
family.Streptococcaceae.id.1850	rs6563952	16	73391982	0.0012114	20.164	G	C	0.0801931	0.0178576	8.71e-06	16627	G	C	0.0348	0.0274	0.2046	218792
family.Streptococcaceae.id.1850	rs6806351	3	132058723	0.00128297	20.8056	T	C	-0.0619209	0.0135744	6.94e-06	16198	T	C	-0.0214	0.0192	0.2644	218792
family.Streptococcaceae.id.1850	rs76717940	3	94153993	0.00262558	20.3175	T	A	0.150606	0.0334079	3.09e-06	7720	T	A	0.004	0.0347	0.9083	218792
family.Streptococcaceae.id.1850	rs77968078	1	240441766	0.0012559	19.5123	G	A	-0.0993013	0.0224788	7.93e-06	15519	G	A	0.0258	0.0332	0.4361	218792
family.Streptococcaceae.id.1850	rs7916711	10	28588269	0.00127707	19.8365	A	G	0.0959639	0.021545	6.33e-06	15515	A	G	-0.0007	0.023	0.9772	218792
family.Streptococcaceae.id.1850	rs957755	7	46778653	0.00121751	20.2658	T	G	-0.0642449	0.0142702	7.42e-06	16627	T	G	0.0062	0.0228	0.785199	218792
family.Streptococcaceae.id.1850	rs9903102	17	80581123	0.00121524	20.2232	C	A	-0.0693015	0.0154096	4.92e-06	16623	C	A	0.0236	0.0199	0.2372	218792
family.Veillonellaceae.id.2172	rs111810795	14	102897930	0.00147548	23.056	C	T	-0.0867108	0.0180573	1.73e-06	15605	C	T	-0.0085	0.0267	0.749	218792
family.Veillonellaceae.id.2172	rs114889439	13	61597625	0.00673516	22.1462	A	G	-0.253809	0.0539169	6.19e-06	3268	A	G	0.0585	0.0438	0.1816	218792
family.Veillonellaceae.id.2172	rs11700976	21	35576123	0.00122419	19.5731	C	A	0.0503337	0.0113763	9.25e-06	15971	C	A	0.0098	0.0159	0.5362	218792
family.Veillonellaceae.id.2172	rs12186441	5	132646303	0.00399649	21.0015	G	A	0.208096	0.0453999	4.53e-06	5236	G	A	-0.0273	0.0397	0.4917	218792
family.Veillonellaceae.id.2172	rs12668619	7	21637810	0.00138141	22.0902	A	G	0.055301	0.0117654	2.57e-06	15971	A	G	0.0087	0.0169	0.608001	218792
family.Veillonellaceae.id.2172	rs12741784	1	50088819	0.00170822	27.1473	C	T	-0.0621452	0.0119266	1.28e-07	15867	C	T	0.0361	0.0182	0.0476398	218792
family.Veillonellaceae.id.2172	rs1442060	4	46366067	0.00131379	21.0141	G	A	-0.0514024	0.0112125	4.51e-06	15976	G	A	-0.001	0.0161	0.9496	218792
family.Veillonellaceae.id.2172	rs1447205	8	41231597	0.00126748	20.266	G	C	-0.0520689	0.0115656	7.35e-06	15971	G	C	0.0235	0.0165	0.1557	218792
family.Veillonellaceae.id.2172	rs1693340	18	30208691	0.00133617	20.1443	T	C	0.0818934	0.018245	9.25e-06	15058	T	C	0.0109	0.0308	0.723401	218792
family.Veillonellaceae.id.2172	rs2175069	4	23317124	0.00131412	21.0194	A	G	-0.0526752	0.0114886	4.64e-06	15976	A	G	0.0114	0.0164	0.4881	218792
family.Veillonellaceae.id.2172	rs2561116	5	38348199	0.00124783	19.9578	T	G	-0.083617	0.0187159	7.89e-06	15976	T	G	-0.0149	0.0339	0.6599	218792
family.Veillonellaceae.id.2172	rs2585520	13	78785141	0.00131348	20.3844	G	T	-0.0904972	0.0200428	5.27e-06	15501	G	T	0.0235	0.0412	0.5682	218792
family.Veillonellaceae.id.2172	rs4263802	8	138319508	0.00122843	19.647	G	A	0.050942	0.0114921	7.45e-06	15976	G	A	-0.0301	0.0169	0.0742899	218792
family.Veillonellaceae.id.2172	rs4461038	15	78546996	0.00134915	21.5764	A	G	-0.0554965	0.0119467	3.73e-06	15973	A	G	0.0036	0.0174	0.8376	218792
family.Veillonellaceae.id.2172	rs4797169	18	462180	0.00131233	20.9881	T	C	0.0587799	0.0128297	4.49e-06	15974	T	C	0.0258	0.0187	0.1673	218792
family.Veillonellaceae.id.2172	rs61264131	6	139188534	0.0061376	18.9773	A	C	0.202367	0.0464388	6.75e-06	3075	A	C	0.0234	0.0269	0.3833	218792
family.Veillonellaceae.id.2172	rs6692542	1	244391618	0.00127666	20.4195	A	G	0.0534397	0.0118254	8.68e-06	15976	A	G	-0.0091	0.0168	0.5867	218792
family.Veillonellaceae.id.2172	rs6909981	6	75534152	0.00126891	20.2953	C	T	-0.0638697	0.0141765	5.48e-06	15976	C	T	-0.0223	0.0242	0.3572	218792
family.Veillonellaceae.id.2172	rs75768969	13	101617913	0.00125858	20.1287	C	G	-0.0703773	0.0156855	7.19e-06	15975	C	G	0.0008	0.0285	0.9773	218792
family.Veillonellaceae.id.2172	rs79535861	13	38326692	0.00156757	23.643	A	C	0.100666	0.0207016	1.58e-06	15061	A	C	-0.023	0.0276	0.4049	218792
family.Veillonellaceae.id.2172	rs9345168	6	92380922	0.00126326	20.2049	C	A	0.0509102	0.0113253	8.49e-06	15976	C	A	-0.0099	0.016	0.534101	218792
family.Verrucomicrobiaceae.id.4036	rs11184341	1	105422565	0.00178603	21.2238	G	C	0.0655301	0.014223	4.14e-06	11864	G	C	0.0048	0.0178	0.788	218792
family.Verrucomicrobiaceae.id.4036	rs111862613	12	130309670	0.00182569	21.2515	T	C	0.0907065	0.0196746	3.73e-06	11621	T	C	0.0048	0.0214	0.8222	218792
family.Verrucomicrobiaceae.id.4036	rs117107102	18	49473635	0.00450094	22.4844	A	G	0.204683	0.0431573	2.92e-06	4975	A	G	0.0608	0.0372	0.1021	218792
family.Verrucomicrobiaceae.id.4036	rs11729256	4	95027272	0.00209725	24.9235	T	C	0.0749798	0.0150177	6.73e-07	11861	T	C	-0.0147	0.0211	0.486	218792
family.Verrucomicrobiaceae.id.4036	rs12908520	15	97570657	0.00188075	22.3496	G	A	0.0619104	0.0130946	2.15e-06	11863	G	A	-0.0022	0.016	0.8901	218792
family.Verrucomicrobiaceae.id.4036	rs2602429	16	81063149	0.001945	22.7775	C	T	0.0745516	0.0156195	2.7e-06	11690	C	T	-0.0131	0.0181	0.4693	218792
family.Verrucomicrobiaceae.id.4036	rs4242783	10	5064327	0.00185278	21.6955	G	A	0.0687992	0.0147694	2.75e-06	11690	G	A	-0.0046	0.0177	0.793	218792
family.Verrucomicrobiaceae.id.4036	rs4936098	11	130280667	0.00191696	22.7711	A	G	0.0648691	0.0135928	1.13e-06	11858	A	G	0.0051	0.0166	0.7587	218792
family.Verrucomicrobiaceae.id.4036	rs61779207	1	41074472	0.00176195	20.4553	G	A	-0.0758811	0.0167762	6.63e-06	11591	G	A	-0.001	0.0191	0.9601	218792
family.Verrucomicrobiaceae.id.4036	rs74542928	4	100544188	0.00200131	22.4877	T	C	0.112124	0.0236422	1.65e-06	11216	T	C	-0.0302	0.0371	0.415	218792
family.Verrucomicrobiaceae.id.4036	rs9349825	6	56341481	0.00192904	22.9149	A	G	-0.0704354	0.0147128	2.51e-06	11858	A	G	0.0017	0.0203	0.9343	218792
family.Verrucomicrobiaceae.id.4036	rs941682	20	31867840	0.00163132	19.2925	G	A	-0.0631526	0.0143767	9.58e-06	11809	G	A	0.021	0.0178	0.2368	218792
family.Victivallaceae.id.2255	rs11671100	19	711637	0.00625606	20.9575	A	C	-0.160034	0.0349472	4.08e-06	3331	A	C	0.0526	0.0199	0.008288	218792
family.Victivallaceae.id.2255	rs11764871	7	146808977	0.00623912	24.5293	G	T	0.127099	0.025656	7.49e-07	3909	G	T	0.0134	0.0172	0.438	218792
family.Victivallaceae.id.2255	rs2546105	5	94692439	0.00615589	24.2496	A	T	0.126643	0.0257111	1.03e-06	3917	A	T	-0.0061	0.0184	0.7413	218792
family.Victivallaceae.id.2255	rs2944282	7	57589803	0.00652505	23.3358	T	C	-0.124197	0.0257026	1.57e-06	3555	T	C	-0.0039	0.0177	0.8236	218792
family.Victivallaceae.id.2255	rs34962571	12	131103256	0.00612928	19.9505	A	C	-0.186945	0.0418412	6.25e-06	3237	A	C	-0.0081	0.0265	0.759	218792
family.Victivallaceae.id.2255	rs4396289	11	9316730	0.00712739	28.0753	C	T	-0.152918	0.0288525	1.54e-07	3913	C	T	0.0305	0.0236	0.1963	218792
family.Victivallaceae.id.2255	rs61702987	2	31211657	0.00598591	23.5097	T	C	0.145501	0.0300007	3.08e-06	3906	T	C	0.0016	0.0255	0.9484	218792
family.Victivallaceae.id.2255	rs62570196	9	111086170	0.00832655	25.9367	C	T	-0.246101	0.0483077	2.7e-07	3091	C	T	-0.0019	0.0399	0.9619	218792
family.Victivallaceae.id.2255	rs6545794	2	60484909	0.00589336	23.2034	A	G	-0.197786	0.0410495	5.97e-07	3916	A	G	0.0427	0.0244	0.0801309	218792
family.Victivallaceae.id.2255	rs67832247	2	2649472	0.00599482	21.4281	C	T	-0.123489	0.0266695	3.24e-06	3555	C	T	-0.0106	0.0172	0.5359	218792
family.Victivallaceae.id.2255	rs7077363	10	95286954	0.00556365	21.8756	G	A	0.148942	0.0318366	2.83e-06	3912	G	A	-0.0109	0.0215	0.6111	218792
family.Victivallaceae.id.2255	rs7314815	12	102525047	0.00510649	20.0688	G	A	0.101088	0.0225594	6.4e-06	3912	G	A	0.0092	0.016	0.5636	218792
family.Victivallaceae.id.2255	rs7627405	3	9968555	0.00554134	19.7981	C	T	-0.134158	0.0301427	8.19e-06	3555	C	T	0.0164	0.0201	0.4134	218792
family.Victivallaceae.id.2255	rs7860510	9	94128796	0.00491258	19.303	G	C	0.164855	0.0375128	9.6e-06	3912	G	C	0.0277	0.0296	0.349	218792
genus..Clostridiuminnocuumgroup.id.14397	rs10074000	5	113131580	0.00500366	20.3466	T	C	-0.102648	0.0227508	7e-06	4048	T	C	0.0013	0.0165	0.9392	218792
genus..Clostridiuminnocuumgroup.id.14397	rs10506058	12	30268485	0.00482514	20.1748	A	G	0.0997048	0.0221926	8.92e-06	4163	A	G	0.0157	0.0161	0.3282	218792
genus..Clostridiuminnocuumgroup.id.14397	rs1942371	18	69274308	0.00534594	21.3321	G	A	-0.157938	0.034187	4.06e-06	3971	G	A	-0.0095	0.0243	0.6971	218792
genus..Clostridiuminnocuumgroup.id.14397	rs1948423	3	103025517	0.00515834	21.5855	T	A	-0.108859	0.023425	3.49e-06	4165	T	A	0.0149	0.0167	0.3696	218792
genus..Clostridiuminnocuumgroup.id.14397	rs40656	5	9368158	0.00517082	21.0299	C	T	0.142664	0.0311021	8.62e-06	4048	C	T	0.0198	0.0199	0.3211	218792
genus..Clostridiuminnocuumgroup.id.14397	rs4869133	5	95717619	0.00517994	19.4374	G	A	-0.180591	0.0409505	7.24e-06	3735	G	A	-0.017	0.0209	0.4169	218792
genus..Clostridiuminnocuumgroup.id.14397	rs61267978	18	6348227	0.00501918	21.0002	T	C	0.14708	0.0320875	5.59e-06	4165	T	C	0.017	0.0243	0.4829	218792
genus..Clostridiuminnocuumgroup.id.14397	rs6577484	1	8419420	0.00509671	19.7536	G	A	0.160425	0.0360857	8.41e-06	3858	G	A	0.037	0.0265	0.1618	218792
genus..Clostridiuminnocuumgroup.id.14397	rs6890185	5	71186626	0.00564942	23.6579	T	C	0.113424	0.0233137	1.12e-06	4166	T	C	0.0023	0.017	0.8899	218792
genus..Clostridiuminnocuumgroup.id.14397	rs71564433	6	143718234	0.00508817	21.2853	T	A	-0.126746	0.0274657	7.8e-06	4164	T	A	0.0108	0.02	0.5907	218792
genus..Clostridiuminnocuumgroup.id.14397	rs77845139	15	59705541	0.00491436	19.9817	A	G	-0.114993	0.0257186	8.41e-06	4048	A	G	-0.0096	0.0185	0.6056	218792
genus..Eubacteriumbrachygroup.id.11296	rs112617308	10	94185213	0.00551239	22.1662	T	C	-0.170873	0.0362844	2.38e-06	4001	T	C	0.0173	0.0274	0.5273	218792
genus..Eubacteriumbrachygroup.id.11296	rs12151423	2	218237281	0.00512893	19.8585	A	G	0.101329	0.0227324	9.27e-06	3854	A	G	-0.0153	0.0158	0.3325	218792
genus..Eubacteriumbrachygroup.id.11296	rs13139592	4	144665178	0.00515558	19.9	T	C	-0.145997	0.0327192	7.97e-06	3842	T	C	-0.0466	0.0235	0.0479303	218792
genus..Eubacteriumbrachygroup.id.11296	rs1384962	14	23060552	0.00512557	20.6028	A	G	0.120888	0.0266264	6.99e-06	4001	A	G	-0.0163	0.0171	0.3392	218792
genus..Eubacteriumbrachygroup.id.11296	rs2913110	10	22892667	0.00522224	20.9934	C	T	0.105143	0.022942	4.56e-06	4001	C	T	-0.0127	0.0166	0.4432	218792
genus..Eubacteriumbrachygroup.id.11296	rs4862235	4	184628931	0.00535945	21.5425	G	A	0.104806	0.0225751	3.73e-06	4000	G	A	0.0008	0.016	0.9582	218792
genus..Eubacteriumbrachygroup.id.11296	rs62348779	5	17460096	0.00562938	21.6543	T	C	-0.201481	0.043286	3.78e-06	3827	T	C	0.0118	0.0299	0.6927	218792
genus..Eubacteriumbrachygroup.id.11296	rs6591893	11	80236833	0.00504586	20.2706	G	A	0.108225	0.0240319	7.34e-06	3999	G	A	-0.0052	0.0167	0.757	218792
genus..Eubacteriumbrachygroup.id.11296	rs720439	22	48190598	0.00493551	19.835	A	G	-0.111927	0.0251252	7.03e-06	4001	A	G	-0.0306	0.0185	0.0978611	218792
genus..Eubacteriumbrachygroup.id.11296	rs73199919	4	6856564	0.00655522	19.835	T	C	-0.236717	0.0531335	8.16e-06	3008	T	C	-0.03	0.0368	0.4155	218792
genus..Eubacteriumbrachygroup.id.11296	rs9613196	22	26922534	0.00674439	20.3841	T	A	-0.238718	0.0528561	4.99e-06	3004	T	A	0.0657	0.0401	0.1013	218792
genus..Eubacteriumcoprostanoligenesgroup.id.11375	rs1020520	7	33603146	0.00113549	19.7448	T	G	-0.0590705	0.0132929	8.89e-06	17371	T	G	0.0011	0.0222	0.9604	218792
genus..Eubacteriumcoprostanoligenesgroup.id.11375	rs10444197	10	2215931	0.00114236	19.8745	A	G	-0.0505823	0.0113455	5.98e-06	17380	A	G	0.0061	0.0166	0.713899	218792
genus..Eubacteriumcoprostanoligenesgroup.id.11375	rs11052069	12	32713919	0.00112851	19.6333	T	C	0.0477832	0.0107833	9.38e-06	17380	T	C	-0.001	0.016	0.9501	218792
genus..Eubacteriumcoprostanoligenesgroup.id.11375	rs11720857	3	113794507	0.00112251	19.057	C	T	0.0630776	0.0144485	9.26e-06	16960	C	T	-0.0103	0.0208	0.6218	218792
genus..Eubacteriumcoprostanoligenesgroup.id.11375	rs12906958	15	36911598	0.00121537	21.1464	C	T	-0.0533159	0.0115935	4.35e-06	17380	C	T	0.0391	0.0175	0.0250501	218792
genus..Eubacteriumcoprostanoligenesgroup.id.11375	rs17159861	7	31085162	0.00187528	32.6499	C	T	0.0962228	0.0168388	1.04e-08	17380	C	T	0.0337	0.0258	0.1912	218792
genus..Eubacteriumcoprostanoligenesgroup.id.11375	rs2644213	10	84506096	0.00113517	19.7494	G	A	0.0538845	0.0121245	9.86e-06	17380	G	A	0.0199	0.0172	0.2493	218792
genus..Eubacteriumcoprostanoligenesgroup.id.11375	rs4076415	15	86440997	0.00128464	21.8129	T	G	0.0515152	0.0110294	1.99e-06	16960	T	G	0.0092	0.0165	0.578699	218792
genus..Eubacteriumcoprostanoligenesgroup.id.11375	rs62024432	15	97869293	0.00115678	19.9996	C	T	-0.0769698	0.0172101	7.5e-06	17271	C	T	-0.0437	0.0269	0.1042	218792
genus..Eubacteriumcoprostanoligenesgroup.id.11375	rs6762473	3	127139574	0.00123871	21.5493	C	A	0.0521584	0.0112353	4.26e-06	17377	C	A	0.0164	0.0167	0.3248	218792
genus..Eubacteriumcoprostanoligenesgroup.id.11375	rs76898927	3	81595477	0.00174663	21.3374	G	A	0.123055	0.0266375	4.79e-06	12197	G	A	0.059	0.035	0.092289	218792
genus..Eubacteriumcoprostanoligenesgroup.id.11375	rs79895140	2	50797401	0.00127623	20.6208	T	C	-0.0641017	0.0141153	8.62e-06	16139	T	C	0.0057	0.0254	0.8217	218792
genus..Eubacteriumcoprostanoligenesgroup.id.11375	rs9648214	7	16380806	0.0014616	25.4354	T	C	-0.0828719	0.016431	2.52e-07	17379	T	C	0.012	0.0282	0.669501	218792
genus..Eubacteriumeligensgroup.id.14372	rs158115	14	77619186	0.00156839	23.0539	G	C	0.0915271	0.0190611	9.74e-06	14678	G	C	-0.001	0.0238	0.9676	218792
genus..Eubacteriumeligensgroup.id.14372	rs182318	11	31098691	0.00120208	17.7821	G	A	-0.0824941	0.0195615	8.4e-06	14777	G	A	0.0123	0.0292	0.673101	218792
genus..Eubacteriumeligensgroup.id.14372	rs2200429	13	107563458	0.00135674	20.0514	A	G	-0.0888825	0.0198479	5.3e-06	14761	A	G	0.0468	0.0267	0.07993	218792
genus..Eubacteriumeligensgroup.id.14372	rs265534	10	83092007	0.00148832	22.0212	T	G	-0.0563756	0.0120127	2.27e-06	14776	T	G	-0.0212	0.0159	0.1825	218792
genus..Eubacteriumeligensgroup.id.14372	rs4583233	16	81820486	0.00190627	27.3595	A	C	0.0670205	0.0128122	2.84e-07	14327	A	C	0.0036	0.0176	0.8394	218792
genus..Eubacteriumeligensgroup.id.14372	rs56080211	2	110260993	0.00176835	18.9496	C	T	0.123093	0.0282743	9.14e-06	10699	C	T	-0.0299	0.03	0.3184	218792
genus..Eubacteriumeligensgroup.id.14372	rs6923695	6	70956815	0.00156784	20.2396	T	G	0.103268	0.0229524	4.87e-06	12891	T	G	0.0047	0.0319	0.8826	218792
genus..Eubacteriumeligensgroup.id.14372	rs72839198	2	115197171	0.00347427	17.1669	C	G	0.155659	0.0375612	3.14e-06	4926	C	G	-0.0161	0.0276	0.5598	218792
genus..Eubacteriumeligensgroup.id.14372	rs74606150	14	39301409	0.00394309	21.2938	C	G	-0.196454	0.042565	4.25e-06	5381	C	G	-0.0644	0.0402	0.1094	218792
genus..Eubacteriumfissicatenagroup.id.14373	rs10147907	14	89484373	0.0049124	18.9123	T	G	0.172263	0.039601	8.27e-06	3833	T	G	-0.0243	0.0301	0.4184	218792
genus..Eubacteriumfissicatenagroup.id.14373	rs11818408	10	96758467	0.00552041	19.9172	G	A	0.10585	0.0237114	8.2e-06	3590	G	A	0.002	0.0163	0.9026	218792
genus..Eubacteriumfissicatenagroup.id.14373	rs11876297	18	45753272	0.00637228	21.7662	T	C	0.131469	0.0281712	2.67e-06	3396	T	C	0.0096	0.018	0.5938	218792
genus..Eubacteriumfissicatenagroup.id.14373	rs151257695	7	73043561	0.0058801	21.2049	A	G	0.20951	0.0454847	3.1e-06	3587	A	G	0.0264	0.0309	0.3934	218792
genus..Eubacteriumfissicatenagroup.id.14373	rs1768152	3	39604954	0.005392	19.4514	T	C	0.139489	0.0316186	8.7e-06	3590	T	C	0.037	0.0259	0.1538	218792
genus..Eubacteriumfissicatenagroup.id.14373	rs2733072	8	5433699	0.00598126	23.0521	G	A	0.109644	0.0228306	1.49e-06	3833	G	A	0.0077	0.0159	0.6313	218792
genus..Eubacteriumfissicatenagroup.id.14373	rs3771393	2	71145246	0.00630853	24.0611	C	T	0.130842	0.0266671	7.38e-07	3792	C	T	-0.0031	0.02	0.8766	218792
genus..Eubacteriumfissicatenagroup.id.14373	rs6934739	6	39940437	0.00504941	19.4323	A	G	0.111463	0.0252788	9.75e-06	3831	A	G	-0.0093	0.0168	0.5807	218792
genus..Eubacteriumfissicatenagroup.id.14373	rs7104872	11	115165111	0.00585437	22.5366	G	A	0.138612	0.0291906	2.73e-06	3829	G	A	0.0252	0.0253	0.3205	218792
genus..Eubacteriumhalliigroup.id.11338	rs10501370	11	58040621	0.00151376	20.9549	C	T	-0.115589	0.0252489	5.42e-06	13824	C	T	-0.0412	0.0329	0.2108	218792
genus..Eubacteriumhalliigroup.id.11338	rs10798999	1	34308917	0.00135867	22.5288	C	T	0.0601661	0.0126752	2.61e-06	16561	C	T	0.01	0.018	0.5776	218792
genus..Eubacteriumhalliigroup.id.11338	rs10808115	7	100635375	0.00127117	21.0825	A	C	-0.0504747	0.0109922	4.42e-06	16566	A	C	0.0264	0.0159	0.0955895	218792
genus..Eubacteriumhalliigroup.id.11338	rs117748144	11	11771637	0.00178637	19.4329	T	C	-0.126582	0.028712	7.86e-06	10861	T	C	-0.0552	0.0362	0.1273	218792
genus..Eubacteriumhalliigroup.id.11338	rs13116360	4	111885431	0.00259868	26.8908	T	C	0.154124	0.0297185	2.94e-07	10323	T	C	0.0108	0.0322	0.737099	218792
genus..Eubacteriumhalliigroup.id.11338	rs138531890	3	195259206	0.00248455	19.1986	A	G	0.153138	0.0349456	5.43e-06	7710	A	G	-0.0103	0.0298	0.729001	218792
genus..Eubacteriumhalliigroup.id.11338	rs17074066	4	183709536	0.00116892	18.4929	T	C	-0.0813986	0.0189272	9.35e-06	15804	T	C	0.0555	0.0561	0.322	218792
genus..Eubacteriumhalliigroup.id.11338	rs17474256	1	104524676	0.001171	19.2949	G	A	0.0810805	0.0184573	9.45e-06	16460	G	A	0.0216	0.0268	0.4199	218792
genus..Eubacteriumhalliigroup.id.11338	rs281379	19	49214274	0.00122835	19.8352	A	G	-0.0499523	0.0112153	9.33e-06	16130	A	G	0.0355	0.0161	0.0275899	218792
genus..Eubacteriumhalliigroup.id.11338	rs28584818	3	64664456	0.00198265	22.0372	A	G	0.126115	0.0268627	4.43e-06	11095	A	G	0.012	0.0294	0.6836	218792
genus..Eubacteriumhalliigroup.id.11338	rs60254196	7	148856720	0.00134344	21.8415	A	G	-0.0522832	0.0111865	2.7e-06	16238	A	G	0.0098	0.016	0.541	218792
genus..Eubacteriumhalliigroup.id.11338	rs630939	18	48384463	0.00121826	19.8037	C	T	-0.0508914	0.0114352	9.16e-06	16238	C	T	-0.0022	0.0161	0.8896	218792
genus..Eubacteriumhalliigroup.id.11338	rs6550770	3	23663416	0.00463956	19.9359	T	C	-0.198087	0.0443545	4.82e-06	4279	T	C	0.0395	0.0401	0.3237	218792
genus..Eubacteriumhalliigroup.id.11338	rs74018587	15	62014160	0.00742512	22.7188	C	T	0.208943	0.043822	3.7e-06	3039	C	T	-0.0355	0.0402	0.3773	218792
genus..Eubacteriumhalliigroup.id.11338	rs78056098	11	123789877	0.0011994	19.8931	G	T	-0.0507411	0.0113758	8.29e-06	16568	G	T	-0.0315	0.0166	0.0568997	218792
genus..Eubacteriumhalliigroup.id.11338	rs949971	3	110283389	0.00130496	21.6436	T	G	-0.0540164	0.0116101	3.29e-06	16566	T	G	-0.0117	0.0169	0.489	218792
genus..Eubacteriumnodatumgroup.id.11297	rs10263623	7	64894137	0.0062674	19.4127	C	T	0.193496	0.0439023	8.91e-06	3080	C	T	-0.021	0.0408	0.6065	218792
genus..Eubacteriumnodatumgroup.id.11297	rs10458299	7	135052348	0.00608115	20.0009	T	C	-0.187753	0.041969	8.37e-06	3271	T	C	0.0374	0.0302	0.2161	218792
genus..Eubacteriumnodatumgroup.id.11297	rs11006576	10	61322015	0.00605327	20.0548	A	G	-0.110167	0.024593	7.99e-06	3295	A	G	0.0138	0.016	0.3888	218792
genus..Eubacteriumnodatumgroup.id.11297	rs113893692	9	28245518	0.00654155	21.0247	C	T	-0.185107	0.0403573	5.76e-06	3195	C	T	0.0002	0.0243	0.9943	218792
genus..Eubacteriumnodatumgroup.id.11297	rs34297067	14	52185888	0.00907593	29.941	A	G	-0.186907	0.0341475	6.6e-08	3271	A	G	-0.0318	0.0224	0.156	218792
genus..Eubacteriumnodatumgroup.id.11297	rs61841040	10	9659749	0.00666479	22.0944	G	T	0.160621	0.0341609	3.56e-06	3295	G	T	-0.0179	0.02	0.372	218792
genus..Eubacteriumnodatumgroup.id.11297	rs6818880	4	94712747	0.00604942	20.0176	A	G	-0.110081	0.0245964	7.83e-06	3291	A	G	-0.0029	0.016	0.8547	218792
genus..Eubacteriumnodatumgroup.id.11297	rs77910827	9	96597985	0.00722551	23.7921	C	T	0.201788	0.0413568	9.05e-07	3271	C	T	0.0137	0.0256	0.5916	218792
genus..Eubacteriumnodatumgroup.id.11297	rs7827125	8	4954912	0.00612996	20.3043	C	T	0.1223	0.0271331	7.17e-06	3294	C	T	-0.0108	0.0177	0.5429	218792
genus..Eubacteriumnodatumgroup.id.11297	rs7880204	1	171060821	0.00626459	20.753	T	C	-0.125454	0.0275303	6.84e-06	3294	T	C	0.015	0.0184	0.415	218792
genus..Eubacteriumnodatumgroup.id.11297	rs9425984	1	34529736	0.00598852	19.833	T	C	-0.130234	0.0292347	7.21e-06	3294	T	C	0.0215	0.0192	0.2619	218792
genus..Eubacteriumoxidoreducensgroup.id.11339	rs12129908	1	195064019	0.0037584	20.2776	C	A	0.0893272	0.0198333	5.8e-06	5377	C	A	-0.0098	0.0162	0.5452	218792
genus..Eubacteriumoxidoreducensgroup.id.11339	rs12423772	12	94515340	0.00427298	22.8255	G	T	0.14098	0.0295029	2.63e-06	5321	G	T	-0.014	0.0228	0.5398	218792
genus..Eubacteriumoxidoreducensgroup.id.11339	rs1425962	4	187905399	0.00381932	20.3928	G	C	0.0906104	0.0200612	7.32e-06	5321	G	C	-0.0029	0.0163	0.8567	218792
genus..Eubacteriumoxidoreducensgroup.id.11339	rs2973294	4	37526679	0.00413511	22.3227	G	T	0.0923559	0.0195439	2.39e-06	5378	G	T	0.018	0.0161	0.2627	218792
genus..Eubacteriumoxidoreducensgroup.id.11339	rs34561138	16	86480355	0.0052486	22.076	G	A	0.216145	0.045992	2.51e-06	4186	G	A	0.0227	0.0413	0.583001	218792
genus..Eubacteriumoxidoreducensgroup.id.11339	rs440215	5	106882394	0.00422464	22.8038	C	T	0.0932766	0.0195294	1.65e-06	5377	C	T	0.0038	0.0159	0.8138	218792
genus..Eubacteriumrectalegroup.id.14374	rs10248854	7	121281238	0.00124589	21.6382	C	A	-0.0527827	0.0113463	4.21e-06	17348	C	A	0.0091	0.0162	0.576301	218792
genus..Eubacteriumrectalegroup.id.14374	rs10797540	1	234530370	0.0012406	21.5487	A	G	0.0503179	0.0108389	3.53e-06	17350	A	G	0.0384	0.016	0.0161399	218792
genus..Eubacteriumrectalegroup.id.14374	rs10892089	11	98523638	0.001185	20.5829	C	G	-0.0635522	0.0140072	6.22e-06	17351	C	G	-0.0107	0.0204	0.5988	218792
genus..Eubacteriumrectalegroup.id.14374	rs117151453	12	20066025	0.00154936	21.5789	G	C	-0.113141	0.0243541	1.84e-06	13908	G	C	0.0183	0.0254	0.4708	218792
genus..Eubacteriumrectalegroup.id.14374	rs143694765	1	116082909	0.00127772	19.3464	T	C	0.0870025	0.019779	9.75e-06	15124	T	C	0.0133	0.0263	0.6133	218792
genus..Eubacteriumrectalegroup.id.14374	rs16960159	18	37703874	0.00259595	21.6857	C	G	-0.156596	0.0336234	4.1e-06	8334	C	G	0.0225	0.0271	0.4057	218792
genus..Eubacteriumrectalegroup.id.14374	rs2884897	11	8129537	0.00184934	20.0303	A	G	-0.129364	0.0289021	6.44e-06	10813	A	G	-0.0211	0.0433	0.6264	218792
genus..Eubacteriumrectalegroup.id.14374	rs314726	2	125553155	0.00137318	23.3266	T	C	0.0528824	0.0109486	1.38e-06	16966	T	C	-0.0077	0.0159	0.630001	218792
genus..Eubacteriumrectalegroup.id.14374	rs35398954	15	93006765	0.00160098	26.6494	A	G	-0.0901402	0.0174602	5.4e-07	16621	A	G	-0.0033	0.0217	0.8794	218792
genus..Eubacteriumrectalegroup.id.14374	rs3980709	1	170900221	0.00113038	19.6207	A	T	-0.0622701	0.0140572	6.86e-06	17340	A	T	-0.0697	0.0209	0.000860597	218792
genus..Eubacteriumrectalegroup.id.14374	rs59427698	9	129425745	0.00116513	19.3765	A	G	-0.0576035	0.0130853	5.37e-06	16613	A	G	-0.0085	0.0203	0.6771	218792
genus..Eubacteriumrectalegroup.id.14374	rs62547233	9	92013419	0.00114633	19.9059	A	G	0.0536319	0.0120201	9.9e-06	17347	A	G	0.0477	0.0176	0.00674606	218792
genus..Eubacteriumruminantiumgroup.id.11340	rs10131724	14	52219066	0.00456081	23.2247	A	C	-0.199832	0.0414577	2.39e-06	5071	A	C	-0.0043	0.0268	0.8715	218792
genus..Eubacteriumruminantiumgroup.id.11340	rs10923018	1	88523399	0.0026262	20.3724	G	A	0.0726438	0.0160924	6.8e-06	7739	G	A	-0.0152	0.016	0.3414	218792
genus..Eubacteriumruminantiumgroup.id.11340	rs112375806	22	48749548	0.00332233	23.7372	T	A	0.143141	0.0293757	5.82e-06	7123	T	A	0.003	0.0232	0.8971	218792
genus..Eubacteriumruminantiumgroup.id.11340	rs11637981	15	61289622	0.00267913	20.7277	G	T	-0.073258	0.0160888	5.44e-06	7718	G	T	0.0057	0.016	0.721499	218792
genus..Eubacteriumruminantiumgroup.id.11340	rs13025464	2	201610645	0.00261042	20.247	T	C	-0.0737077	0.0163786	6.97e-06	7738	T	C	0.0138	0.0162	0.3951	218792
genus..Eubacteriumruminantiumgroup.id.11340	rs139749	22	25303055	0.00330046	24.2129	C	T	-0.0845439	0.0171791	8.59e-07	7314	C	T	-0.0193	0.0168	0.2511	218792
genus..Eubacteriumruminantiumgroup.id.11340	rs16891896	5	33897589	0.00419586	20.0185	G	A	-0.174787	0.0390573	2.38e-06	4753	G	A	-0.0035	0.0284	0.9026	218792
genus..Eubacteriumruminantiumgroup.id.11340	rs17519472	12	30360954	0.00274569	21.222	C	T	0.107804	0.0233984	4.7e-06	7710	C	T	-0.0122	0.023	0.5966	218792
genus..Eubacteriumruminantiumgroup.id.11340	rs209813	6	11953633	0.00263148	19.1602	G	A	-0.103488	0.0236391	9.23e-06	7264	G	A	0.0339	0.0225	0.1316	218792
genus..Eubacteriumruminantiumgroup.id.11340	rs2116427	5	121182996	0.00321784	24.9768	A	G	0.0911461	0.0182353	4.67e-07	7739	A	G	0.0147	0.0182	0.4183	218792
genus..Eubacteriumruminantiumgroup.id.11340	rs2229917	9	130980937	0.00317672	22.4609	A	G	0.153538	0.0323922	2.16e-06	7050	A	G	-0.0606	0.0395	0.125	218792
genus..Eubacteriumruminantiumgroup.id.11340	rs2418654	2	71247578	0.00277984	20.3829	C	T	-0.0748879	0.0165852	6.17e-06	7314	C	T	0.0057	0.0162	0.7274	218792
genus..Eubacteriumruminantiumgroup.id.11340	rs2817174	1	3044181	0.00260339	20.1193	C	T	-0.0734306	0.0163687	7.87e-06	7710	C	T	-0.0123	0.0162	0.4493	218792
genus..Eubacteriumruminantiumgroup.id.11340	rs57340348	6	130030114	0.0029052	21.3047	T	C	-0.0979429	0.0212166	4.93e-06	7314	T	C	-0.0098	0.0199	0.6239	218792
genus..Eubacteriumruminantiumgroup.id.11340	rs606117	9	2539358	0.00292357	21.2903	A	G	0.0833243	0.018056	4.82e-06	7263	A	G	0.0121	0.0179	0.4977	218792
genus..Eubacteriumruminantiumgroup.id.11340	rs6676699	1	197978281	0.00264462	20.4335	G	T	-0.0888124	0.0196447	6.38e-06	7708	G	T	0.0055	0.0173	0.7501	218792
genus..Eubacteriumruminantiumgroup.id.11340	rs7000472	8	138626268	0.00274268	21.2785	A	G	-0.0762282	0.016523	4.07e-06	7739	A	G	-0.018	0.0161	0.2657	218792
genus..Eubacteriumruminantiumgroup.id.11340	rs72836424	10	129037453	0.00294777	21.6178	C	T	-0.139825	0.030069	2.62e-06	7314	C	T	-0.0038	0.0254	0.8821	218792
genus..Eubacteriumruminantiumgroup.id.11340	rs73139629	12	63306003	0.00293843	21.5491	A	C	-0.115098	0.0247909	5.36e-06	7314	A	C	-0.0116	0.0274	0.671901	218792
genus..Eubacteriumventriosumgroup.id.11341	rs11617697	13	98785900	0.00217667	25.0754	A	G	-0.143349	0.0286241	7.22e-07	11497	A	G	-0.0627	0.0349	0.0729693	218792
genus..Eubacteriumventriosumgroup.id.11341	rs12964517	18	22460785	0.00147755	22.6207	G	A	0.0587198	0.0123453	2.07e-06	15289	G	A	-0.0059	0.0176	0.7381	218792
genus..Eubacteriumventriosumgroup.id.11341	rs13082419	3	107736434	0.00135399	19.6581	C	T	-0.0715522	0.016137	9.56e-06	14501	C	T	-0.0269	0.0254	0.2881	218792
genus..Eubacteriumventriosumgroup.id.11341	rs16884680	8	114445055	0.00145701	22.3059	G	T	-0.0906428	0.0191909	1.74e-06	15289	G	T	0.0445	0.026	0.0873494	218792
genus..Eubacteriumventriosumgroup.id.11341	rs35179274	14	51960625	0.00135243	20.6999	C	T	-0.0627263	0.013786	5.76e-06	15287	C	T	-0.0173	0.0207	0.4033	218792
genus..Eubacteriumventriosumgroup.id.11341	rs3809430	14	44975510	0.00139962	21.4232	T	C	-0.0548171	0.0118426	3.55e-06	15287	T	C	-0.016	0.0172	0.3514	218792
genus..Eubacteriumventriosumgroup.id.11341	rs57199565	3	190223732	0.0015998	23.8929	T	C	0.0783394	0.0160257	7.97e-07	14913	T	C	0.0087	0.0209	0.675499	218792
genus..Eubacteriumventriosumgroup.id.11341	rs6048195	20	2308307	0.00180324	26.803	A	T	-0.0603594	0.011658	2.5e-07	14839	A	T	-0.0039	0.0166	0.8135	218792
genus..Eubacteriumventriosumgroup.id.11341	rs66746423	1	109398264	0.00142131	20.7465	C	T	0.0751501	0.0164978	6.11e-06	14578	C	T	0.0258	0.022	0.2422	218792
genus..Eubacteriumventriosumgroup.id.11341	rs66830358	3	171895648	0.00134522	20.0857	T	A	0.0528752	0.0117972	6.87e-06	14913	T	A	-0.0164	0.0161	0.3095	218792
genus..Eubacteriumventriosumgroup.id.11341	rs6704822	2	203661779	0.0012843	19.6583	A	G	0.0739179	0.0166705	6.62e-06	15289	A	G	0.0375	0.0235	0.1112	218792
genus..Eubacteriumventriosumgroup.id.11341	rs72783037	16	60348381	0.00137273	21.0097	C	A	0.0658926	0.0143747	6.55e-06	15286	C	A	-0.0045	0.0195	0.819	218792
genus..Eubacteriumventriosumgroup.id.11341	rs73615400	20	50140919	0.00161122	24.4398	T	C	-0.0956303	0.0193428	9.54e-07	15146	T	C	-0.0041	0.0269	0.8785	218792
genus..Eubacteriumventriosumgroup.id.11341	rs73849225	4	126371814	0.00129578	18.9053	T	C	0.0975711	0.0224388	5.21e-06	14573	T	C	0.0246	0.0287	0.3913	218792
genus..Eubacteriumventriosumgroup.id.11341	rs78250280	1	147291928	0.00139999	20.7951	G	A	0.0749762	0.0164404	3.36e-06	14835	G	A	-0.0125	0.0228	0.5846	218792
genus..Eubacteriumventriosumgroup.id.11341	rs876734	12	52423996	0.00145919	21.7898	C	T	-0.0618696	0.0132532	2.89e-06	14913	C	T	0.0171	0.0178	0.3364	218792
genus..Eubacteriumventriosumgroup.id.11341	rs9316536	13	51938576	0.00130059	19.9081	T	G	-0.0817111	0.0183121	7.84e-06	15289	T	G	0.0061	0.0228	0.789	218792
genus..Eubacteriumxylanophilumgroup.id.14375	rs10140184	14	73181783	0.00161834	20.9558	A	C	0.0576795	0.012599	4.96e-06	12930	A	C	0.0201	0.0162	0.2145	218792
genus..Eubacteriumxylanophilumgroup.id.14375	rs10917203	1	22627266	0.00169074	21.8949	A	C	0.0612633	0.0130917	3.15e-06	12930	A	C	0.0059	0.0163	0.714801	218792
genus..Eubacteriumxylanophilumgroup.id.14375	rs112176119	16	73696771	0.00174397	21.3084	C	T	-0.113455	0.0245762	3.33e-06	12199	C	T	0.024	0.0276	0.3848	218792
genus..Eubacteriumxylanophilumgroup.id.14375	rs12980122	19	8255478	0.00171245	20.6481	C	G	-0.108274	0.0238257	5.02e-06	12039	C	G	0.0141	0.0306	0.6459	218792
genus..Eubacteriumxylanophilumgroup.id.14375	rs13239072	7	43566344	0.00174019	23.1936	G	A	0.0687427	0.0142728	1.82e-06	13307	G	A	-0.0069	0.0178	0.699301	218792
genus..Eubacteriumxylanophilumgroup.id.14375	rs17830032	20	57995506	0.00279988	26.7437	G	A	-0.160597	0.0310515	2.39e-07	9527	G	A	-0.0289	0.0294	0.3245	218792
genus..Eubacteriumxylanophilumgroup.id.14375	rs1999224	9	130498120	0.00163149	21.7457	G	T	-0.0949051	0.0203503	3.75e-06	13309	G	T	0.0767	0.0267	0.00406996	218792
genus..Eubacteriumxylanophilumgroup.id.14375	rs2012708	16	84790559	0.0015309	20.3983	A	G	0.0573202	0.0126905	6.53e-06	13306	A	G	-0.0141	0.0167	0.3968	218792
genus..Eubacteriumxylanophilumgroup.id.14375	rs2213117	11	131009660	0.00167199	21.5646	T	G	0.0877797	0.0189012	4.21e-06	12878	T	G	-0.0449	0.0218	0.0389197	218792
genus..Eubacteriumxylanophilumgroup.id.14375	rs4654122	1	246780557	0.00150486	20.0554	C	G	0.0553508	0.0123588	7.2e-06	13309	C	G	0.0268	0.0159	0.0914492	218792
genus..Eubacteriumxylanophilumgroup.id.14375	rs75586835	4	87891938	0.00150274	18.8848	A	G	-0.114498	0.0263455	9.39e-06	12550	A	G	-0.0315	0.0311	0.3118	218792
genus..Eubacteriumxylanophilumgroup.id.14375	rs79582700	17	66689958	0.00170569	22.6458	C	G	-0.0951677	0.0199969	2.41e-06	13256	C	G	0.0081	0.0242	0.737999	218792
genus..Ruminococcusgauvreauiigroup.id.11342	rs10931481	2	191954852	0.00163098	21.8582	G	A	0.0610096	0.0130484	3.38e-06	13382	G	A	0.0068	0.0175	0.696899	218792
genus..Ruminococcusgauvreauiigroup.id.11342	rs12079579	1	161880482	0.00154035	20.0308	A	G	0.0955324	0.0213436	5.04e-06	12986	A	G	0.0316	0.0284	0.2661	218792
genus..Ruminococcusgauvreauiigroup.id.11342	rs12539819	7	153487396	0.00177901	21.1332	C	T	0.110654	0.0240684	4.49e-06	11860	C	T	0.0472	0.0322	0.143	218792
genus..Ruminococcusgauvreauiigroup.id.11342	rs13188803	5	112627773	0.00159131	20.4522	T	A	0.0709419	0.0156855	7.28e-06	12834	T	A	-0.0029	0.0178	0.8716	218792
genus..Ruminococcusgauvreauiigroup.id.11342	rs1391597	12	61119266	0.001667	22.3417	C	T	0.0590284	0.0124874	1.86e-06	13382	C	T	0.0241	0.0162	0.1375	218792
genus..Ruminococcusgauvreauiigroup.id.11342	rs2047242	10	29201860	0.00190764	25.5481	A	G	-0.067603	0.0133738	2.46e-07	13369	A	G	-0.0011	0.0189	0.9518	218792
genus..Ruminococcusgauvreauiigroup.id.11342	rs2105937	1	20552485	0.00153982	20.6069	A	G	0.0580215	0.0127806	5.1e-06	13364	A	G	-0.0079	0.0167	0.635501	218792
genus..Ruminococcusgauvreauiigroup.id.11342	rs2166943	8	137090850	0.00157316	21.0742	A	C	0.0566974	0.0123497	5.28e-06	13377	A	C	0.0088	0.016	0.582599	218792
genus..Ruminococcusgauvreauiigroup.id.11342	rs289410	15	85563483	0.00165405	22.1645	G	A	-0.0654926	0.0139101	2.27e-06	13380	G	A	-0.024	0.0177	0.1755	218792
genus..Ruminococcusgauvreauiigroup.id.11342	rs431418	5	166419552	0.00152685	20.3182	A	G	-0.094737	0.0210157	5.54e-06	13289	A	G	-0.0098	0.0271	0.7179	218792
genus..Ruminococcusgauvreauiigroup.id.11342	rs71386687	16	2767894	0.00226412	25.7288	T	G	0.121037	0.02386	2.91e-07	11340	T	G	0.0094	0.0252	0.708	218792
genus..Ruminococcusgauvreauiigroup.id.11342	rs73802842	4	18824860	0.00140732	18.8565	C	A	0.0736808	0.0169665	7.48e-06	13382	C	A	0.0122	0.0187	0.5124	218792
genus..Ruminococcusgauvreauiigroup.id.11342	rs9870933	3	112372317	0.00181358	24.3098	A	G	0.0621643	0.0126072	8.49e-07	13382	A	G	-0.0131	0.0162	0.4184	218792
genus..Ruminococcusgnavusgroup.id.14376	rs11597105	10	6512581	0.00329667	20.9237	A	G	0.114673	0.0250653	6.95e-06	6328	A	G	0.0047	0.0199	0.8144	218792
genus..Ruminococcusgnavusgroup.id.14376	rs11864644	16	433078	0.00308245	19.2909	T	C	-0.139804	0.0318253	5.01e-06	6241	T	C	-0.0051	0.025	0.8381	218792
genus..Ruminococcusgnavusgroup.id.14376	rs12136548	1	115168097	0.00328146	21.0672	C	T	0.0901946	0.0196476	3.1e-06	6401	C	T	0.0145	0.0175	0.4085	218792
genus..Ruminococcusgnavusgroup.id.14376	rs12989336	2	36259341	0.00316213	20.2987	G	A	-0.0846861	0.0187936	7.12e-06	6401	G	A	-0.0034	0.0177	0.8494	218792
genus..Ruminococcusgnavusgroup.id.14376	rs13163520	5	18662686	0.00466688	29.6517	G	A	-0.127377	0.0233883	5.61e-08	6326	G	A	-0.0165	0.0205	0.4198	218792
genus..Ruminococcusgnavusgroup.id.14376	rs2909242	8	129224680	0.00382663	24.5807	C	A	-0.0909965	0.018351	7.41e-07	6401	C	A	0.0443	0.0169	0.00876597	218792
genus..Ruminococcusgnavusgroup.id.14376	rs3124783	9	135838591	0.00337581	21.675	A	G	-0.11599	0.0249099	2.67e-06	6401	A	G	0.0273	0.0236	0.2467	218792
genus..Ruminococcusgnavusgroup.id.14376	rs4388134	4	190110710	0.00307982	19.7625	C	T	-0.0904997	0.0203544	9.12e-06	6399	C	T	-0.0178	0.0178	0.3166	218792
genus..Ruminococcusgnavusgroup.id.14376	rs62167033	2	144700007	0.00419117	21.8522	T	C	0.185289	0.0396295	3.5e-06	5194	T	C	0.0513	0.04	0.1997	218792
genus..Ruminococcusgnavusgroup.id.14376	rs78399089	3	146290310	0.00327959	19.5514	T	C	0.144445	0.0326618	6.63e-06	5944	T	C	-0.0186	0.025	0.4566	218792
genus..Ruminococcusgnavusgroup.id.14376	rs934940	2	122096018	0.00330713	20.9273	A	C	-0.105045	0.0229588	2.74e-06	6309	A	C	-0.0031	0.0233	0.8928	218792
genus..Ruminococcusgnavusgroup.id.14376	rs9872758	3	66701851	0.00359956	23.106	T	C	0.0849233	0.0176643	1.66e-06	6398	T	C	0.0332	0.0159	0.03724	218792
genus..Ruminococcustorquesgroup.id.14377	rs10904297	10	4639762	0.00586135	18.5191	A	G	-0.167804	0.0389812	2.69e-06	3143	A	G	-0.0027	0.0553	0.9614	218792
genus..Ruminococcustorquesgroup.id.14377	rs10967781	9	27225258	0.00112822	20.0927	C	A	0.0507994	0.0113322	8.37e-06	17791	C	A	0.0229	0.0175	0.1896	218792
genus..Ruminococcustorquesgroup.id.14377	rs12434631	14	26130404	0.00136454	23.7084	A	G	0.074697	0.0153401	2.77e-06	17353	A	G	-0.0113	0.026	0.663399	218792
genus..Ruminococcustorquesgroup.id.14377	rs13154778	5	56952803	0.00106192	18.9149	T	A	0.0563358	0.0129526	7.16e-06	17795	T	A	0.0384	0.0183	0.0359402	218792
genus..Ruminococcustorquesgroup.id.14377	rs1475330	6	67262102	0.00112906	19.6125	T	C	0.0523492	0.01182	8.13e-06	17353	T	C	0.0258	0.0187	0.1676	218792
genus..Ruminococcustorquesgroup.id.14377	rs1972694	15	25326425	0.00115113	19.9963	T	A	-0.0614094	0.0137321	8.93e-06	17353	T	A	0.0013	0.0207	0.9512	218792
genus..Ruminococcustorquesgroup.id.14377	rs35866622	19	49218060	0.00181138	31.2812	T	C	-0.0612024	0.0109421	2.21e-08	17240	T	C	0.0345	0.0167	0.0393396	218792
genus..Ruminococcustorquesgroup.id.14377	rs4073731	11	132663147	0.0011796	21.0111	T	C	0.0651948	0.0142221	4.05e-06	17793	T	C	-0.0038	0.0216	0.8603	218792
genus..Ruminococcustorquesgroup.id.14377	rs73130967	7	54781314	0.00123071	20.9589	A	T	0.0770375	0.0168264	3.71e-06	17011	A	T	-0.0081	0.0285	0.7759	218792
genus..Ruminococcustorquesgroup.id.14377	rs77034621	8	76769843	0.00237086	20.3547	T	G	-0.151553	0.0335878	6.07e-06	8567	T	G	0.0838	0.0617	0.1744	218792
genus..Ruminococcustorquesgroup.id.14377	rs773123	12	56494998	0.00131871	22.4595	T	A	0.0824005	0.0173862	1.59e-06	17011	T	A	0.0159	0.0242	0.5119	218792
genus..Ruminococcustorquesgroup.id.14377	rs8080469	17	14534862	0.0011796	21.0169	G	A	0.0490727	0.0107036	3.5e-06	17798	G	A	-0.0032	0.0158	0.8395	218792
genus..Ruminococcustorquesgroup.id.14377	rs8141465	22	21362474	0.00112422	20.0212	A	G	0.0480778	0.0107442	9.65e-06	17791	A	G	-0.0116	0.0165	0.481599	218792
genus.Actinomyces.id.423	rs10787984	10	121356829	0.00260606	19.5077	G	C	0.094316	0.0213513	9.62e-06	7468	G	C	-0.0422	0.0263	0.1083	218792
genus.Actinomyces.id.423	rs2715439	15	99492313	0.00274061	20.5177	C	T	0.0746684	0.0164822	6.27e-06	7468	C	T	-0.0055	0.0159	0.7286	218792
genus.Actinomyces.id.423	rs34583783	6	67207371	0.00296881	22.2311	G	T	0.126596	0.0268461	4.49e-06	7468	G	T	-0.0108	0.0334	0.746299	218792
genus.Actinomyces.id.423	rs35011108	6	133007480	0.00583798	20.6293	A	G	0.232634	0.0512044	6.34e-06	3515	A	G	-0.006	0.0318	0.8513	218792
genus.Actinomyces.id.423	rs4073240	6	169224781	0.00267944	20.0585	G	A	0.0749687	0.0167368	7.94e-06	7468	G	A	0.0299	0.0163	0.0665503	218792
genus.Actinomyces.id.423	rs4146653	10	4782841	0.00282533	21.1537	G	A	0.0985224	0.0214182	4.5e-06	7468	G	A	-0.0067	0.0228	0.77	218792
genus.Actinomyces.id.423	rs71315246	3	101352439	0.00261307	19.5603	A	G	-0.0969809	0.021925	9.83e-06	7468	A	G	0.0296	0.0231	0.1999	218792
genus.Actinomyces.id.423	rs7915461	10	127532121	0.00412048	21.8462	T	C	0.18776	0.0401636	5.92e-06	5282	T	C	-0.0144	0.0316	0.6478	218792
genus.Adlercreutzia.id.812	rs1046175	10	135204950	0.00240403	19.3966	C	G	0.112758	0.0255994	6.36e-06	8051	C	G	-0.0083	0.0313	0.7913	218792
genus.Adlercreutzia.id.813	rs11604400	11	98386085	0.00234559	19.0557	C	T	-0.102524	0.0234834	9.74e-06	8107	C	T	-0.0521	0.0259	0.04432	218792
genus.Adlercreutzia.id.814	rs12522517	5	31991834	0.0024335	19.9668	A	T	-0.104884	0.0234695	4.41e-06	8187	A	T	0.0185	0.0226	0.4117	218792
genus.Adlercreutzia.id.815	rs13231526	7	48844151	0.00261684	21.1182	C	A	0.143237	0.0311654	4.81e-06	8051	C	A	0.0441	0.0293	0.1319	218792
genus.Adlercreutzia.id.816	rs2147798	1	201061818	0.00279199	23.0732	C	G	0.0922959	0.0192121	1.4e-06	8243	C	G	-0.0048	0.0184	0.7955	218792
genus.Adlercreutzia.id.817	rs2717140	18	75009770	0.00272795	22.5425	C	T	-0.119225	0.0251081	2.05e-06	8243	C	T	-0.0166	0.0267	0.5332	218792
genus.Adlercreutzia.id.818	rs55719207	3	105355971	0.00236934	19.5721	G	A	-0.0699243	0.0158036	9.61e-06	8243	G	A	0.0249	0.0163	0.1267	218792
genus.Adlercreutzia.id.819	rs6664405	1	69444163	0.00253378	20.4462	T	C	-0.0953084	0.0210752	5.23e-06	8051	T	C	-0.0056	0.0228	0.8062	218792
genus.Adlercreutzia.id.820	rs7680684	4	171281359	0.00294783	24.3649	C	T	-0.083381	0.0168901	9.77e-07	8243	C	T	-0.0128	0.0167	0.443	218792
genus.Adlercreutzia.id.821	rs80078995	5	94059857	0.00286746	23.6987	A	T	-0.11324	0.0232586	1.57e-06	8243	A	T	0.0118	0.0225	0.6002	218792
genus.Adlercreutzia.id.822	rs9490822	6	123909083	0.00268949	22.2238	C	T	-0.0734512	0.0155789	2.54e-06	8243	C	T	0.0415	0.0159	0.00915693	218792
genus.Adlercreutzia.id.823	rs9915817	17	48864179	0.00239754	19.8056	T	C	0.0749219	0.016833	8.22e-06	8243	T	C	-0.0404	0.0175	0.0212598	218792
genus.Akkermansia.id.4037	rs11184341	1	105422565	0.00178905	21.2579	G	C	0.0655855	0.0142236	4.06e-06	11863	G	C	0.0048	0.0178	0.788	218792
genus.Akkermansia.id.4037	rs111862613	12	130309670	0.00184246	21.4452	T	C	0.0911199	0.0196748	3.39e-06	11620	T	C	0.0048	0.0214	0.8222	218792
genus.Akkermansia.id.4037	rs117107102	18	49473635	0.00448856	22.4178	A	G	0.204406	0.0431629	3.01e-06	4974	A	G	0.0608	0.0372	0.1021	218792
genus.Akkermansia.id.4037	rs11729256	4	95027272	0.00210099	24.966	T	C	0.0750473	0.0150184	6.58e-07	11860	T	C	-0.0147	0.0211	0.486	218792
genus.Akkermansia.id.4037	rs12908520	15	97570657	0.0018723	22.2471	G	A	0.061772	0.0130954	2.26e-06	11862	G	A	-0.0022	0.016	0.8901	218792
genus.Akkermansia.id.4037	rs2602429	16	81063149	0.00194416	22.7656	C	T	0.0745352	0.0156201	2.72e-06	11689	C	T	-0.0131	0.0181	0.4693	218792
genus.Akkermansia.id.4037	rs4242783	10	5064327	0.00183914	21.5336	G	A	0.0685454	0.0147701	3e-06	11689	G	A	-0.0046	0.0177	0.793	218792
genus.Akkermansia.id.4037	rs4936098	11	130280667	0.00192011	22.8067	A	G	0.0649225	0.0135934	1.1e-06	11857	A	G	0.0051	0.0166	0.7587	218792
genus.Akkermansia.id.4037	rs61779207	1	41074472	0.00176997	20.5468	G	A	-0.0760539	0.0167769	6.32e-06	11590	G	A	-0.001	0.0191	0.9601	218792
genus.Akkermansia.id.4037	rs74542928	4	100544188	0.00201908	22.6858	T	C	0.112623	0.0236434	1.48e-06	11215	T	C	-0.0302	0.0371	0.415	218792
genus.Akkermansia.id.4037	rs9349825	6	56341481	0.0019239	22.8518	A	G	-0.0703407	0.0147133	2.6e-06	11857	A	G	0.0017	0.0203	0.9343	218792
genus.Akkermansia.id.4037	rs941682	20	31867840	0.00163864	19.3775	G	A	-0.0632957	0.0143777	9.17e-06	11808	G	A	0.021	0.0178	0.2368	218792
genus.Alistipes.id.968	rs1107244	13	38057357	0.00111629	19.6341	G	A	0.0758558	0.0171182	3.59e-06	17571	G	A	0.0243	0.0294	0.409	218792
genus.Alistipes.id.968	rs11769002	7	62443498	0.00132817	23.3657	G	A	-0.0528793	0.0109389	1.45e-06	17571	G	A	0.0143	0.0161	0.3747	218792
genus.Alistipes.id.968	rs11958296	5	177755179	0.00124482	20.2062	A	G	-0.0981222	0.0218272	9.3e-06	16214	A	G	0.0496	0.0384	0.1962	218792
genus.Alistipes.id.968	rs12990744	2	178000949	0.0012059	20.1531	C	T	-0.0776618	0.0172986	8.21e-06	16694	C	T	0.0038	0.0263	0.8865	218792
genus.Alistipes.id.968	rs1689282	9	14080129	0.00121751	20.8301	A	C	-0.0520061	0.0113942	5.28e-06	17090	A	C	-0.0114	0.017	0.5033	218792
genus.Alistipes.id.968	rs2290844	10	127787142	0.00102574	18.0398	C	T	0.0813969	0.0191632	9.1e-06	17571	C	T	0.0274	0.0253	0.278	218792
genus.Alistipes.id.968	rs2450745	8	144428720	0.00108054	19.0046	A	C	-0.080524	0.0184702	7.12e-06	17571	A	C	0.0024	0.0312	0.9395	218792
genus.Alistipes.id.968	rs2875322	11	130887552	0.00111779	19.5351	T	C	-0.0580945	0.0131432	8.78e-06	17459	T	C	0.005	0.0212	0.8115	218792
genus.Alistipes.id.968	rs34417064	17	52776479	0.00115653	20.3414	A	G	-0.048202	0.0106868	7.01e-06	17570	A	G	0.0123	0.0159	0.4374	218792
genus.Alistipes.id.968	rs4810359	20	41191335	0.00114522	19.9244	A	G	-0.0652428	0.0146155	7.5e-06	17380	A	G	-0.0162	0.0242	0.5028	218792
genus.Alistipes.id.968	rs62576416	9	112121089	0.00114624	20.1534	T	C	0.0492647	0.0109733	7.5e-06	17564	T	C	0.006	0.0163	0.7127	218792
genus.Alistipes.id.968	rs7129639	11	17511427	0.00130433	22.9458	C	A	-0.0524955	0.0109584	1.78e-06	17571	C	A	0.0092	0.0169	0.587899	218792
genus.Alistipes.id.968	rs8130320	21	40580258	0.00118841	20.904	A	G	-0.049002	0.010717	4.84e-06	17571	A	G	0.0136	0.016	0.3951	218792
genus.Allisonella.id.2174	rs1901739	5	114286707	0.00670486	21.6679	T	G	0.115769	0.0248626	3.59e-06	3212	T	G	-0.019	0.0159	0.2321	218792
genus.Allisonella.id.2174	rs35110698	12	28018998	0.00643326	20.7845	T	C	-0.146322	0.0320852	5.72e-06	3212	T	C	-0.0385	0.0225	0.0877991	218792
genus.Allisonella.id.2174	rs35778461	9	100150556	0.007527	24.3449	C	T	0.146679	0.0297186	1.21e-06	3212	C	T	0.0088	0.0189	0.642401	218792
genus.Allisonella.id.2174	rs594561	11	88632972	0.00615272	19.8725	C	T	0.112231	0.0251681	9.41e-06	3212	C	T	-0.0204	0.0158	0.1974	218792
genus.Allisonella.id.2174	rs602075	9	79110160	0.00997858	32.3541	A	G	0.168974	0.0296976	3.57e-08	3212	A	G	0.0075	0.018	0.676401	218792
genus.Allisonella.id.2174	rs6742198	2	33607071	0.00693158	22.1963	G	A	0.149152	0.0316484	3.35e-06	3182	G	A	-0.0074	0.0186	0.69	218792
genus.Allisonella.id.2174	rs685403	18	75370866	0.00580761	18.7513	G	C	-0.175203	0.0404474	4.88e-06	3212	G	C	0.0099	0.0234	0.672901	218792
genus.Allisonella.id.2174	rs76904847	7	137968010	0.00614462	19.6607	G	A	0.148523	0.0334857	6.09e-06	3182	G	A	0.0318	0.021	0.1299	218792
genus.Allisonella.id.2174	rs7898615	10	122413451	0.00625407	20.2019	T	G	0.167966	0.0373586	8.87e-06	3212	T	G	0.0219	0.0232	0.3446	218792
genus.Alloprevotella.id.961	rs17380632	3	79794395	0.00661972	20.0381	A	T	0.125564	0.0280409	9.27e-06	3009	A	T	-0.028	0.0187	0.1342	218792
genus.Alloprevotella.id.961	rs2154444	21	36053643	0.00660881	20.0049	T	G	0.138234	0.0308961	8.37e-06	3009	T	G	0.0062	0.018	0.730801	218792
genus.Alloprevotella.id.961	rs34619204	21	40993008	0.00678943	20.5144	G	A	-0.156037	0.0344392	8.84e-06	3003	G	A	-0.0029	0.0209	0.8906	218792
genus.Alloprevotella.id.961	rs4364940	1	234126516	0.00662695	20.0535	A	G	0.126418	0.0282207	8.58e-06	3008	A	G	0.0111	0.0171	0.516799	218792
genus.Alloprevotella.id.961	rs4680035	3	152805600	0.00701735	21.2361	A	G	-0.119599	0.0259446	4.99e-06	3007	A	G	0.0169	0.0163	0.2982	218792
genus.Alloprevotella.id.961	rs58212166	4	189076705	0.00668624	20.2139	A	G	-0.161506	0.0359102	7.94e-06	3005	A	G	0.0037	0.0205	0.8566	218792
genus.Anaerofilum.id.2053	rs10794359	11	1051715	0.00450395	22.5854	T	C	-0.0953524	0.02006	2.23e-06	4994	T	C	-0.0004	0.0161	0.9814	218792
genus.Anaerofilum.id.2053	rs1563175	2	3838940	0.00411757	20.8755	A	C	0.0923834	0.0202157	5.54e-06	5051	A	C	-0.0157	0.0159	0.3234	218792
genus.Anaerofilum.id.2053	rs17012738	2	76698142	0.00401378	20.3472	T	G	0.0903417	0.0200239	7.24e-06	5051	T	G	-0.0233	0.0158	0.1402	218792
genus.Anaerofilum.id.2053	rs17096874	14	30991358	0.00435058	22.062	C	T	-0.126337	0.0268919	2.86e-06	5051	C	T	-0.0132	0.0194	0.4963	218792
genus.Anaerofilum.id.2053	rs17105491	10	125294406	0.0045214	22.0466	G	C	-0.193107	0.0411187	1.57e-06	4856	G	C	0.0223	0.0329	0.4969	218792
genus.Anaerofilum.id.2053	rs356049	17	6450532	0.00417482	20.9281	G	A	0.132603	0.0289802	6.56e-06	4994	G	A	-0.0735	0.0319	0.0213599	218792
genus.Anaerofilum.id.2053	rs4244069	12	67167461	0.00399923	20.1888	G	A	-0.146775	0.0326594	9.81e-06	5030	G	A	0.0163	0.024	0.498101	218792
genus.Anaerofilum.id.2053	rs4506496	1	247145690	0.00473034	23.4457	G	A	0.10309	0.0212861	1.49e-06	4935	G	A	0.0127	0.0175	0.4674	218792
genus.Anaerofilum.id.2053	rs712981	3	129686434	0.00485854	24.6505	A	C	0.10076	0.0202902	6.83e-07	5051	A	C	0.0371	0.0163	0.0227798	218792
genus.Anaerofilum.id.2053	rs79598899	2	191139151	0.00551538	26.1049	C	T	0.182586	0.0357284	3.75e-07	4709	C	T	-0.0249	0.0377	0.5081	218792
genus.Anaerofilum.id.2053	rs816292	12	117811409	0.00521241	26.2772	T	C	-0.113003	0.02204	2.64e-07	5017	T	C	0.0008	0.0174	0.9618	218792
genus.Anaerofilum.id.2053	rs9299345	9	104339812	0.00401255	20.341	T	C	-0.1364	0.0302372	8.04e-06	5051	T	C	-0.035	0.0269	0.1934	218792
genus.Anaerostipes.id.1991	rs10502061	11	105615253	0.00112469	18.942	A	G	0.0835752	0.0192017	7.94e-06	16825	A	G	-0.02	0.0249	0.4224	218792
genus.Anaerostipes.id.1991	rs13376554	1	67595108	0.00593758	18.5105	A	T	0.197389	0.0458642	7.72e-06	3101	A	T	-0.0422	0.051	0.4084	218792
genus.Anaerostipes.id.1991	rs2014785	3	171100102	0.00128294	21.1224	T	C	0.0515687	0.0112199	4.68e-06	16445	T	C	0.024	0.0162	0.1382	218792
genus.Anaerostipes.id.1991	rs2396460	2	228018671	0.00129307	21.8941	T	C	-0.0512653	0.0109555	2.91e-06	16912	T	C	0.0036	0.016	0.8231	218792
genus.Anaerostipes.id.1991	rs2804244	10	117383184	0.00135007	22.8795	A	G	-0.053089	0.0110983	2.04e-06	16926	A	G	0.0031	0.0163	0.8482	218792
genus.Anaerostipes.id.1991	rs3900776	9	13525082	0.00147291	21.6719	G	A	-0.110013	0.0236302	2.75e-06	14694	G	A	-0.0596	0.048	0.2146	218792
genus.Anaerostipes.id.1991	rs60983350	17	2850737	0.00131065	21.4468	G	A	-0.0539901	0.0116575	4.42e-06	16344	G	A	-0.023	0.0172	0.1807	218792
genus.Anaerostipes.id.1991	rs62157625	2	142774333	0.00149544	22.7842	T	C	0.088573	0.0185548	1.45e-06	15215	T	C	-0.0217	0.0244	0.3744	218792
genus.Anaerostipes.id.1991	rs62215703	21	25873624	0.00142946	22.2571	G	A	0.0644965	0.0136702	1.98e-06	15550	G	A	-0.0073	0.0193	0.7045	218792
genus.Anaerostipes.id.1991	rs6474958	9	1582701	0.00117693	19.9324	A	G	-0.0500065	0.0112001	6.74e-06	16918	A	G	0.0028	0.0171	0.8689	218792
genus.Anaerostipes.id.1991	rs6726833	2	39351569	0.0012666	21.4606	C	A	-0.0877497	0.0189408	3.32e-06	16924	C	A	-0.0097	0.0295	0.741899	218792
genus.Anaerostipes.id.1991	rs6854026	4	169690814	0.00128267	21.7294	T	C	-0.0508482	0.0109075	3.2e-06	16921	T	C	0.0077	0.016	0.628599	218792
genus.Anaerostipes.id.1991	rs7193624	16	77574020	0.00146324	24.8001	C	T	0.0750642	0.0150723	5.35e-07	16926	C	T	0.0078	0.0288	0.787399	218792
genus.Anaerostipes.id.1991	rs7823228	8	128397494	0.00125525	20.6661	G	C	-0.0621085	0.0136614	5.84e-06	16445	G	C	0.0325	0.0212	0.1258	218792
genus.Anaerostipes.id.1991	rs78735375	19	1497547	0.001952	20.2584	A	C	-0.137429	0.0305304	5.33e-06	10360	A	C	0.0243	0.0407	0.5512	218792
genus.Anaerotruncus.id.2054	rs10150232	14	30418008	0.0012779	20.6197	A	G	0.0567088	0.0124877	6.68e-06	16117	A	G	0.0078	0.0199	0.6965	218792
genus.Anaerotruncus.id.2054	rs11018566	11	89040226	0.00290211	18.2666	A	G	-0.156465	0.0366032	6.14e-06	6278	A	G	-0.0266	0.0355	0.4539	218792
genus.Anaerotruncus.id.2054	rs115414803	4	88163243	0.00222397	20.6644	A	C	-0.144356	0.0317524	6.83e-06	9273	A	C	0.043	0.0329	0.1919	218792
genus.Anaerotruncus.id.2054	rs12056802	8	74713100	0.00119116	19.0909	C	G	0.0774194	0.0177178	6.13e-06	16010	C	G	0.0247	0.0238	0.3009	218792
genus.Anaerotruncus.id.2054	rs1272208	9	78630894	0.00137563	22.1988	G	T	-0.0611743	0.0129831	4.28e-06	16117	G	T	-0.0009	0.0187	0.9595	218792
genus.Anaerotruncus.id.2054	rs1431492	3	150855371	0.00121079	20.0725	C	T	-0.0654996	0.0146188	7.36e-06	16560	C	T	0.0435	0.0217	0.0447301	218792
genus.Anaerotruncus.id.2054	rs17734739	2	211663702	0.00122927	19.6002	T	C	0.0660052	0.014908	7.43e-06	15927	T	C	-0.0116	0.0228	0.6109	218792
genus.Anaerotruncus.id.2054	rs2704155	11	54908652	0.00164544	20.465	T	A	-0.106235	0.0234815	5.42e-06	12419	T	A	-0.9257	0.4077	0.0231798	218792
genus.Anaerotruncus.id.2054	rs2704155	11	54908652	0.00164544	20.465	T	A	-0.106235	0.0234815	5.42e-06	12419	C	A	0.0592	0.041	0.1486	218792
genus.Anaerotruncus.id.2054	rs34449434	12	76523655	0.00119035	19.2054	A	C	-0.0497004	0.0113402	9.85e-06	16117	A	C	-0.0298	0.0167	0.0746294	218792
genus.Anaerotruncus.id.2054	rs4669806	2	12200752	0.00132395	21.9589	G	T	0.0576389	0.0122994	2.42e-06	16566	G	T	0.0035	0.0193	0.8562	218792
genus.Anaerotruncus.id.2054	rs6494922	15	33459867	0.00123937	19.9351	A	G	0.0903106	0.0202257	6.62e-06	16067	A	G	0.0191	0.035	0.5852	218792
genus.Anaerotruncus.id.2054	rs6563550	13	38058413	0.00148449	24.6256	T	C	0.0877135	0.0176745	2.35e-07	16566	T	C	0.0241	0.0294	0.4131	218792
genus.Anaerotruncus.id.2054	rs7155595	14	77502546	0.00124142	20.5722	C	A	0.0539336	0.0118903	7.55e-06	16553	C	A	-0.0176	0.0173	0.3089	218792
genus.Anaerotruncus.id.2054	rs7675045	4	172808992	0.00122204	20.2667	A	T	-0.0497815	0.0110573	6.92e-06	16566	A	T	-0.0011	0.0159	0.9425	218792
genus.Anaerotruncus.id.2054	rs8005030	14	30607199	0.00133568	22.1297	C	T	0.0554447	0.0117854	2.28e-06	16548	C	T	-0.008	0.0168	0.632799	218792
genus.Anaerotruncus.id.2054	rs9347879	6	165015261	0.00126531	20.9851	T	C	0.050618	0.011049	4.22e-06	16566	T	C	0.0056	0.0159	0.7228	218792
genus.Bacteroides.id.918	rs11585893	1	10644351	0.00141067	25.1722	A	G	-0.0740746	0.0147633	1.8e-06	17821	A	G	0.006	0.0186	0.745799	218792
genus.Bacteroides.id.918	rs13207588	6	41519430	0.00114879	20.3627	A	G	-0.059205	0.0131195	7.49e-06	17707	A	G	-0.001	0.0204	0.9607	218792
genus.Bacteroides.id.918	rs1340391	1	102960989	0.00109376	20.0377	T	C	-0.0592004	0.0132244	6.73e-06	18302	T	C	-0.0049	0.0231	0.8311	218792
genus.Bacteroides.id.918	rs17619981	19	24342250	0.00140263	22.1913	T	G	0.0880978	0.0187002	2.69e-06	15801	T	G	0.0008	0.0232	0.9734	218792
genus.Bacteroides.id.918	rs2023437	14	22045949	0.00124414	21.7771	T	C	-0.0782324	0.0167634	5.02e-06	17484	T	C	0.0083	0.0242	0.732399	218792
genus.Bacteroides.id.918	rs2366421	3	62019400	0.00110998	20.3319	T	A	-0.0528153	0.0117124	7.65e-06	18299	T	A	-0.0172	0.0206	0.4057	218792
genus.Bacteroides.id.918	rs28757219	6	29143451	0.00155418	23.0859	T	A	0.0818398	0.0170319	1.29e-06	14833	T	A	0.0248	0.0245	0.3113	218792
genus.Bacteroides.id.918	rs495004	9	112855426	0.00123421	21.8787	C	G	-0.0607475	0.0129865	3.42e-06	17707	C	G	0.0002	0.0189	0.9896	218792
genus.Bacteroides.id.918	rs66474973	20	58614443	0.0014001	24.4001	G	T	0.0812515	0.0164479	6.81e-07	17405	G	T	-0.0454	0.0262	0.0829507	218792
genus.Bacteroides.id.918	rs66710942	3	77215327	0.00115709	20.642	C	T	0.0488038	0.0107412	5.86e-06	17821	C	T	-0.0043	0.0159	0.785301	218792
genus.Bacteroides.id.918	rs6795673	3	10593224	0.00142865	26.1803	C	T	0.0538565	0.0105251	3.38e-07	18301	C	T	0.0026	0.0158	0.8704	218792
genus.Bacteroides.id.918	rs9507307	13	24913678	0.00120359	21.91	C	T	0.0604456	0.0129128	2.13e-06	18184	C	T	-0.0071	0.0185	0.6999	218792
genus.Barnesiella.id.944	rs11155559	6	148601905	0.00150359	20.1499	T	C	0.0956023	0.0212961	8.92e-06	13383	T	C	-0.0115	0.0274	0.674599	218792
genus.Barnesiella.id.944	rs113258194	2	180029855	0.00153038	21.3708	A	G	0.098992	0.0214121	7.31e-06	13945	A	G	0.0587	0.0269	0.0292698	218792
genus.Barnesiella.id.944	rs12909713	15	87145913	0.00147954	21.045	C	T	-0.0550716	0.0120039	4.95e-06	14205	C	T	-0.0267	0.0158	0.0908908	218792
genus.Barnesiella.id.944	rs13242616	7	122021518	0.00160798	22.4562	T	C	-0.0583747	0.0123176	2.29e-06	13945	T	C	0.009	0.0171	0.6002	218792
genus.Barnesiella.id.944	rs199035	6	23435415	0.00156384	21.8388	G	A	0.0559495	0.0119716	3e-06	13945	G	A	0.0235	0.016	0.142	218792
genus.Barnesiella.id.944	rs2057922	7	10076378	0.00155409	22.1117	G	C	0.0915241	0.0194623	3.83e-06	14208	G	C	-0.0117	0.0216	0.5873	218792
genus.Barnesiella.id.944	rs2276875	4	5730954	0.00179362	24.9599	A	G	-0.0697176	0.0139537	4.65e-07	13893	A	G	-0.0178	0.0183	0.3299	218792
genus.Barnesiella.id.944	rs2428166	6	110831148	0.00297936	24.172	G	A	-0.165859	0.0337309	8.51e-07	8091	G	A	-0.1234	0.0675	0.0677205	218792
genus.Barnesiella.id.944	rs28418786	8	25834694	0.00149122	20.4542	C	G	-0.0791324	0.0174957	6.48e-06	13698	C	G	-0.0128	0.0254	0.615	218792
genus.Barnesiella.id.944	rs28479800	1	206216607	0.00152944	18.9895	A	T	-0.09152	0.0210002	7.93e-06	12399	A	T	-0.0059	0.0256	0.818	218792
genus.Barnesiella.id.944	rs35177866	3	181589155	0.00173411	23.2635	A	G	0.0917125	0.0190133	2.95e-06	13394	A	G	-0.0688	0.0306	0.02474	218792
genus.Barnesiella.id.944	rs62251337	3	44327429	0.00153117	21.3818	A	G	-0.0690763	0.0149374	4.24e-06	13945	A	G	-0.0039	0.0227	0.8642	218792
genus.Barnesiella.id.944	rs72684847	4	102616869	0.00156062	20.2917	T	C	-0.114369	0.0253873	6.76e-06	12984	T	C	0.0235	0.0301	0.4338	218792
genus.Barnesiella.id.944	rs76181748	8	105458416	0.00144677	20.5724	C	T	-0.0778559	0.017164	6.78e-06	14201	C	T	0.0064	0.019	0.7373	218792
genus.Barnesiella.id.944	rs77455852	5	54107036	0.0015485	20.7696	T	G	-0.0891491	0.0195601	3.16e-06	13394	T	G	-0.0056	0.0229	0.8062	218792
genus.Barnesiella.id.944	rs79795328	4	114546595	0.00157382	21.5243	A	G	-0.0818645	0.0176441	4.23e-06	13657	A	G	0.0286	0.0229	0.2107	218792
genus.Bifidobacterium.id.436	rs10841473	12	20378911	0.00157131	23.2526	G	C	-0.0624207	0.0129438	1.65e-06	14777	G	C	-0.0144	0.0188	0.4442	218792
genus.Bifidobacterium.id.436	rs12022129	1	207003374	0.00134308	19.8693	G	A	0.0619356	0.0138937	8e-06	14776	G	A	0.0039	0.0177	0.8268	218792
genus.Bifidobacterium.id.436	rs182549	2	136616754	0.0059483	88.418	C	T	0.119703	0.0127294	1.28e-20	14778	C	T	-0.0313	0.0162	0.0535599	218792
genus.Bifidobacterium.id.436	rs2491158	10	126089703	0.00141583	19.8766	G	A	0.0712624	0.015983	8.05e-06	14021	G	A	0.0073	0.0234	0.753701	218792
genus.Bifidobacterium.id.436	rs2686790	7	48090746	0.00135591	20.0621	T	C	0.070741	0.0157926	7.5e-06	14778	T	C	0.0055	0.0223	0.8042	218792
genus.Bifidobacterium.id.436	rs4567981	2	49906864	0.00154675	22.7167	T	A	0.0562084	0.0117923	1.93e-06	14666	T	A	-0.0292	0.0159	0.0663499	218792
genus.Bifidobacterium.id.436	rs540489	17	72897722	0.00144841	21.118	T	G	-0.0637641	0.0138746	5.19e-06	14561	T	G	-0.0081	0.0209	0.697301	218792
genus.Bifidobacterium.id.436	rs55888705	4	1517826	0.0013745	20.3362	A	G	0.0546319	0.0121139	6.67e-06	14777	A	G	-0.0112	0.0176	0.5265	218792
genus.Bifidobacterium.id.436	rs56108664	5	537890	0.00153294	21.362	T	C	0.0729971	0.0157926	2.44e-06	13916	T	C	0.0068	0.0236	0.774	218792
genus.Bifidobacterium.id.436	rs5746486	22	18354272	0.00133152	19.7008	T	C	-0.0536216	0.0120801	9e-06	14778	T	C	0.0071	0.0163	0.665301	218792
genus.Bifidobacterium.id.436	rs62181700	2	189805784	0.00153179	22.6622	G	A	-0.0624643	0.0131205	2.17e-06	14774	G	A	0.0198	0.0184	0.2838	218792
genus.Bifidobacterium.id.436	rs7322849	13	112859829	0.0020957	31.0311	T	C	0.112428	0.0201813	1.08e-08	14778	T	C	-0.0523	0.0278	0.0595402	218792
genus.Bifidobacterium.id.436	rs73797465	5	142800289	0.00141417	20.7667	T	G	-0.0953566	0.0209236	4.38e-06	14666	T	G	0.0096	0.0253	0.703701	218792
genus.Bifidobacterium.id.436	rs75344046	21	31861790	0.00543914	21.0771	C	T	0.232354	0.0505979	4.86e-06	3856	C	T	0.0194	0.0375	0.6056	218792
genus.Bifidobacterium.id.436	rs76671854	5	169748189	0.00152902	21.1389	C	G	-0.0846055	0.0184003	3.96e-06	13806	C	G	-0.0335	0.0241	0.1647	218792
genus.Bifidobacterium.id.436	rs857444	6	14617591	0.00143311	21.2047	C	T	0.0558234	0.0121219	3.57e-06	14777	C	T	0.0121	0.0165	0.463	218792
genus.Bilophila.id.3170	rs11069458	13	102402685	0.00149843	19.2898	T	C	-0.0680947	0.015503	7.72e-06	12856	T	C	-0.0063	0.0205	0.7579	218792
genus.Bilophila.id.3170	rs116261629	6	20505628	0.00212632	24.0233	G	C	0.128112	0.0261358	8.62e-07	11276	G	C	-0.0551	0.0274	0.0440099	218792
genus.Bilophila.id.3170	rs1241171	1	103299921	0.0016526	21.2777	G	A	-0.0692654	0.0150148	4.24e-06	12856	G	A	0.0236	0.0225	0.2948	218792
genus.Bilophila.id.3170	rs1571225	9	4940871	0.0018236	23.4797	C	T	0.0826826	0.0170621	1.12e-06	12854	C	T	-0.0208	0.0214	0.331	218792
genus.Bilophila.id.3170	rs1917709	7	123202306	0.00180081	19.6354	A	T	0.118509	0.026742	7.37e-06	10886	A	T	-0.05	0.0456	0.2733	218792
genus.Bilophila.id.3170	rs1969927	12	100786847	0.00154597	19.7804	G	A	0.0564589	0.0126935	9.07e-06	12777	G	A	0.0108	0.0169	0.522801	218792
genus.Bilophila.id.3170	rs2713349	7	9510367	0.00150624	19.3859	A	T	0.0617228	0.0140174	8.63e-06	12853	A	T	0.0239	0.0174	0.1697	218792
genus.Bilophila.id.3170	rs2728491	7	47211732	0.00157197	20.2379	G	T	-0.0627416	0.0139456	6.33e-06	12856	G	T	-0.0075	0.0186	0.6872	218792
genus.Bilophila.id.3170	rs3827020	20	61980991	0.00179955	22.7621	C	T	0.0766479	0.0160642	1.79e-06	12628	C	T	0.0342	0.0201	0.0885605	218792
genus.Bilophila.id.3170	rs4798126	18	3765773	0.00148739	19.0297	G	A	0.073288	0.016799	7.15e-06	12777	G	A	-0.0148	0.02	0.4598	218792
genus.Bilophila.id.3170	rs542415	15	50011554	0.00165238	21.1441	T	C	-0.0613623	0.0133436	4.71e-06	12777	T	C	0.0202	0.0163	0.2141	218792
genus.Bilophila.id.3170	rs60178956	8	90878338	0.00152403	19.4993	G	A	-0.0624818	0.0141485	8.06e-06	12777	G	A	-0.0312	0.019	0.1007	218792
genus.Bilophila.id.3170	rs6793291	3	194419531	0.00196564	21.7611	C	A	0.112729	0.0241633	3.11e-06	11051	C	A	-0.0211	0.036	0.5571	218792
genus.Bilophila.id.3170	rs72676854	8	109990939	0.00180517	21.0031	T	C	0.123209	0.026882	5.62e-06	11616	T	C	0.0121	0.0358	0.735401	218792
genus.Bilophila.id.3170	rs7802841	7	138583840	0.00183865	23.6775	C	A	0.0670097	0.0137701	1.77e-06	12856	C	A	-0.0088	0.0173	0.611499	218792
genus.Bilophila.id.3170	rs8013541	14	67640571	0.00160876	20.7123	A	T	-0.0571991	0.0125673	5.48e-06	12856	A	T	-0.015	0.016	0.3484	218792
genus.Bilophila.id.3170	rs9899990	17	9121579	0.0015927	19.2801	A	G	-0.102702	0.0233878	9.07e-06	12088	A	G	0.008	0.0287	0.781801	218792
genus.Blautia.id.1992	rs11149971	16	77238810	0.00155285	25.2777	C	T	0.117605	0.02339	1.04e-06	16255	C	T	0.0324	0.0348	0.3509	218792
genus.Blautia.id.1992	rs113271346	14	78077117	0.00118262	20.6765	C	T	0.0782682	0.0172116	6.85e-06	17465	C	T	-0.0237	0.0284	0.4023	218792
genus.Blautia.id.1992	rs115043014	1	175757311	0.00447934	22.0475	G	A	-0.206605	0.043992	5.19e-06	4902	G	A	0.1525	0.061	0.01243	218792
genus.Blautia.id.1992	rs117001700	7	68396262	0.00397721	19.8177	T	C	0.196414	0.0441122	8.84e-06	4965	T	C	-0.003	0.0657	0.9641	218792
genus.Blautia.id.1992	rs12453000	17	16895873	0.0012974	23.1406	C	T	0.0625335	0.0129987	1.26e-06	17815	C	T	0.0062	0.0234	0.7916	218792
genus.Blautia.id.1992	rs16892041	6	9298640	0.00105368	19.2753	T	C	-0.0622605	0.0141804	8.82e-06	18276	T	C	-0.0094	0.0194	0.6293	218792
genus.Blautia.id.1992	rs2788271	1	219117743	0.00101626	18.59	T	G	-0.0575596	0.0133492	7.16e-06	18276	T	G	0.0248	0.0209	0.2358	218792
genus.Blautia.id.1992	rs3005511	6	74605806	0.00111848	20.4621	A	G	0.0501085	0.0110768	6.19e-06	18276	A	G	0.0112	0.0173	0.517299	218792
genus.Blautia.id.1992	rs4926264	19	13420917	0.0011743	21.4844	T	C	0.0826207	0.0178239	5.1e-06	18276	T	C	-0.0352	0.0257	0.1707	218792
genus.Blautia.id.1992	rs67794373	7	124210039	0.00130679	23.7571	C	T	0.0601709	0.0123443	1e-06	18158	C	T	0.0221	0.019	0.2452	218792
genus.Blautia.id.1992	rs682885	11	87805911	0.00115437	21.117	A	G	-0.0493376	0.0107359	4.49e-06	18274	A	G	0.0115	0.017	0.498901	218792
genus.Blautia.id.1992	rs72973581	19	1043103	0.0017395	22.2381	A	G	0.125169	0.0265408	1.74e-06	12764	A	G	-0.026	0.034	0.4451	218792
genus.Blautia.id.1992	rs7860714	9	1866537	0.00114929	20.8952	A	G	-0.0502178	0.0109853	4.09e-06	18162	A	G	0.0266	0.0167	0.112	218792
genus.Butyricicoccus.id.2055	rs10084203	2	191304149	0.00115369	19.789	A	G	0.0549699	0.0123563	8.59e-06	17135	A	G	-0.0024	0.0236	0.9183	218792
genus.Butyricicoccus.id.2055	rs12034718	1	67379595	0.00120827	19.64	A	G	0.0701199	0.0158214	9.58e-06	16237	A	G	-0.0104	0.0191	0.5836	218792
genus.Butyricicoccus.id.2055	rs12585793	13	27018240	0.00682955	21.5441	T	C	-0.262206	0.0564729	5.79e-06	3135	T	C	0.0218	0.0478	0.6479	218792
genus.Butyricicoccus.id.2055	rs2017189	4	7460153	0.0012328	21.1451	G	T	-0.0506956	0.011024	3.87e-06	17133	G	T	-0.0076	0.0159	0.6307	218792
genus.Butyricicoccus.id.2055	rs4962426	10	126908208	0.00120662	20.4007	G	T	0.0614216	0.0135979	7.38e-06	16889	G	T	0.0066	0.0201	0.7438	218792
genus.Butyricicoccus.id.2055	rs56221232	2	153453410	0.00142601	24.4638	T	C	0.0828027	0.0167401	7.62e-07	17133	T	C	-0.0229	0.0264	0.3859	218792
genus.Butyricicoccus.id.2055	rs62478070	7	157688150	0.00508716	20.4782	T	G	0.224039	0.0494959	5.94e-06	4007	T	G	-0.0227	0.0508	0.6546	218792
genus.Butyricicoccus.id.2055	rs7322368	13	100213990	0.00115623	19.8314	T	C	0.0815733	0.0183167	5.52e-06	17134	T	C	0.0071	0.0275	0.7973	218792
genus.Butyricicoccus.id.2055	rs75238760	18	22899113	0.00114966	19.5897	T	A	0.0619423	0.0139942	6.8e-06	17022	T	A	0.0051	0.0235	0.8272	218792
genus.Butyricimonas.id.945	rs11228830	11	56664962	0.00228434	20.542	A	G	0.135265	0.0298411	6.55e-06	8974	A	G	0.0334	0.0292	0.2528	218792
genus.Butyricimonas.id.945	rs113054641	21	16550389	0.00279069	27.8367	G	A	-0.144881	0.0274574	1.74e-07	9949	G	A	-0.0056	0.0386	0.8844	218792
genus.Butyricimonas.id.945	rs12304031	12	129438771	0.00179924	19.2072	G	A	-0.086278	0.0196846	6.7e-06	10658	G	A	-0.0006	0.0242	0.9815	218792
genus.Butyricimonas.id.945	rs12458763	18	34091618	0.00196972	20.488	A	C	0.122037	0.0269587	6.37e-06	10383	A	C	0.0166	0.038	0.6631	218792
genus.Butyricimonas.id.945	rs1862649	16	22172866	0.00204828	20.7732	G	A	0.113124	0.0248176	4.76e-06	10123	G	A	-0.0459	0.0314	0.1434	218792
genus.Butyricimonas.id.945	rs2114713	15	80528373	0.00189333	20.3577	G	T	0.062721	0.0138998	6.88e-06	10734	G	T	-0.0034	0.0159	0.831	218792
genus.Butyricimonas.id.945	rs2642760	5	62119947	0.00225856	24.0674	G	C	0.0713357	0.0145396	8.58e-07	10634	G	C	-0.0065	0.0172	0.7048	218792
genus.Butyricimonas.id.945	rs270727	1	45082825	0.00198883	21.1874	G	C	-0.0694173	0.0150795	5.38e-06	10634	G	C	0.0289	0.0171	0.0906609	218792
genus.Butyricimonas.id.945	rs326049	5	997217	0.00194202	20.5379	C	G	0.0759694	0.0167617	8.19e-06	10557	C	G	-0.0069	0.0181	0.705	218792
genus.Butyricimonas.id.945	rs62130338	19	49162501	0.00202409	21.4076	G	A	-0.0732608	0.0158324	3.9e-06	10557	G	A	-0.043	0.0168	0.0102799	218792
genus.Butyricimonas.id.945	rs62390301	5	159867647	0.00233752	24.9107	T	C	-0.0872983	0.0174893	7.42e-07	10634	T	C	-0.0164	0.0199	0.4076	218792
genus.Butyricimonas.id.945	rs7083431	10	72711156	0.0022048	23.7208	A	C	0.0703539	0.0144439	8.85e-07	10737	A	C	-0.005	0.0178	0.778501	218792
genus.Butyricimonas.id.945	rs71428626	2	83093264	0.00215438	21.1024	G	T	-0.133188	0.0289905	4.8e-06	9776	G	T	-0.1118	0.0447	0.01244	218792
genus.Butyricimonas.id.945	rs72814525	10	72443070	0.0018284	19.662	A	G	0.0664154	0.0149766	8.25e-06	10736	A	G	0.0074	0.0185	0.6892	218792
genus.Butyricimonas.id.945	rs782080	3	127468661	0.00208572	22.4286	T	A	0.0653488	0.0137973	2.23e-06	10733	T	A	0.0121	0.0161	0.4518	218792
genus.Butyricimonas.id.945	rs78453362	3	78740009	0.00253858	20.882	A	G	-0.14948	0.0327073	4.06e-06	8207	A	G	0.022	0.0507	0.664099	218792
genus.Butyricimonas.id.945	rs9657374	8	4834406	0.00196185	21.1018	C	T	0.0680719	0.0148172	4.5e-06	10737	C	T	0.0156	0.0173	0.3683	218792
genus.Butyrivibrio.id.1993	rs1007475	6	148403405	0.00583036	20.4086	G	T	0.118065	0.0261271	7.92e-06	3482	G	T	0.0075	0.0177	0.6736	218792
genus.Butyrivibrio.id.1993	rs11761679	7	150596929	0.00661038	23.1572	T	C	0.154775	0.0321539	2.2e-06	3482	T	C	0.033	0.0229	0.1486	218792
genus.Butyrivibrio.id.1993	rs142855850	10	22587900	0.00618069	20.1002	A	G	0.205013	0.0457138	6.86e-06	3234	A	G	-0.0097	0.0269	0.7188	218792
genus.Butyrivibrio.id.1993	rs16934069	9	119693164	0.00569991	19.9494	T	C	-0.133784	0.0299444	8.86e-06	3482	T	C	-0.0074	0.0209	0.7218	218792
genus.Butyrivibrio.id.1993	rs16941336	17	20575697	0.00645996	22.6268	C	T	0.127488	0.0267936	1.53e-06	3482	C	T	-0.0022	0.0189	0.9092	218792
genus.Butyrivibrio.id.1993	rs17163238	5	128976021	0.00593876	20.7904	G	A	0.140987	0.0309117	5.51e-06	3482	G	A	0.0238	0.0201	0.237	218792
genus.Butyrivibrio.id.1993	rs4537857	13	27292666	0.00650203	22.7752	T	C	-0.12459	0.0260992	1.8e-06	3482	T	C	-0.0021	0.0168	0.8984	218792
genus.Butyrivibrio.id.1993	rs486484	20	811507	0.00586231	20.3678	A	G	-0.108349	0.0240008	6.61e-06	3456	A	G	-0.0341	0.0161	0.0341201	218792
genus.Butyrivibrio.id.1993	rs4928024	3	54288503	0.00575155	20.1254	A	G	-0.17471	0.0389333	8.19e-06	3481	A	G	0.0423	0.0206	0.03983	218792
genus.Butyrivibrio.id.1993	rs72723662	14	76065563	0.00802773	24.8527	C	T	0.224078	0.0449336	7.86e-07	3073	C	T	0.02	0.0234	0.3916	218792
genus.Butyrivibrio.id.1993	rs7412979	1	235580646	0.00657748	23.0279	C	G	0.186779	0.0389112	1.71e-06	3480	C	G	0.0403	0.029	0.1651	218792
genus.Butyrivibrio.id.1993	rs74622183	14	34150977	0.00629702	22.0272	A	G	-0.201027	0.0428204	2.46e-06	3478	A	G	0.0351	0.028	0.2104	218792
genus.Butyrivibrio.id.1993	rs77356209	18	10267733	0.00592401	20.1246	T	C	0.216874	0.0483299	6.66e-06	3379	T	C	0.0564	0.038	0.1376	218792
genus.Butyrivibrio.id.1993	rs7752361	6	111780705	0.00704156	24.6713	A	G	-0.11923	0.0239975	7.69e-07	3481	A	G	0.0053	0.0159	0.7366	218792
genus.Butyrivibrio.id.1993	rs7763512	6	21960091	0.0068185	22.3603	G	A	0.119846	0.0253367	3.11e-06	3259	G	A	-0.0045	0.0161	0.778501	218792
genus.Butyrivibrio.id.1993	rs9349693	6	53939724	0.00588424	20.5984	A	G	0.117973	0.0259861	5.55e-06	3482	A	G	-0.0184	0.0174	0.2914	218792
genus.CandidatusSoleaferrea.id.11350	rs10090365	8	138638199	0.00344697	21.248	A	G	-0.0834413	0.0180989	4.17e-06	6145	A	G	0.0287	0.0158	0.0701795	218792
genus.CandidatusSoleaferrea.id.11350	rs10108780	8	123884361	0.00358555	21.5799	A	G	-0.092834	0.0199807	3.64e-06	5999	A	G	-0.0095	0.0186	0.6072	218792
genus.CandidatusSoleaferrea.id.11350	rs10809135	9	10611282	0.00347903	20.9366	T	C	0.0834858	0.0182426	5.47e-06	5999	T	C	-0.0153	0.0161	0.3445	218792
genus.CandidatusSoleaferrea.id.11350	rs11153159	6	109376647	0.00328761	20.1172	G	C	-0.12805	0.0285446	4.42e-06	6101	G	C	-0.0038	0.0228	0.8679	218792
genus.CandidatusSoleaferrea.id.11350	rs12500231	4	52935445	0.00321895	19.8379	A	T	0.0813853	0.0182696	7.68e-06	6145	A	T	-0.0001	0.0159	0.995	218792
genus.CandidatusSoleaferrea.id.11350	rs2193878	3	190349049	0.00646398	20.0776	T	A	0.228255	0.0509241	9.46e-06	3088	T	A	0.0286	0.0513	0.5776	218792
genus.CandidatusSoleaferrea.id.11350	rs36155147	7	352368	0.00317395	18.9642	C	T	0.104966	0.0240995	5.41e-06	5958	C	T	-0.0094	0.0174	0.5898	218792
genus.CandidatusSoleaferrea.id.11350	rs386526	10	82879688	0.00335061	20.6486	C	G	0.0818459	0.0180086	8.33e-06	6144	C	G	-0.0024	0.0156	0.88	218792
genus.CandidatusSoleaferrea.id.11350	rs4678258	3	137945192	0.00341588	20.9049	T	C	0.0986136	0.0215646	5.53e-06	6101	T	C	-0.0389	0.0186	0.0365797	218792
genus.CandidatusSoleaferrea.id.11350	rs61825792	1	224687852	0.00379638	23.41	T	C	0.112199	0.0231856	1.37e-06	6145	T	C	0.0291	0.0217	0.1804	218792
genus.CandidatusSoleaferrea.id.11350	rs6489992	12	115352769	0.0032768	20.1857	A	G	-0.0840437	0.0187031	7.89e-06	6142	A	G	0.0062	0.0164	0.7047	218792
genus.CandidatusSoleaferrea.id.11350	rs6494306	15	62394540	0.0033207	20.467	A	G	-0.0969304	0.0214221	5.8e-06	6145	A	G	-0.0077	0.017	0.6507	218792
genus.CandidatusSoleaferrea.id.11350	rs6881988	5	172758774	0.00329365	20.2832	G	C	-0.0819131	0.018185	9.23e-06	6140	G	C	-0.022	0.016	0.1696	218792
genus.CandidatusSoleaferrea.id.11350	rs7400877	14	76403542	0.00324017	19.9691	T	C	-0.0951085	0.0212799	9.29e-06	6145	T	C	0.0078	0.0194	0.6862	218792
genus.CandidatusSoleaferrea.id.11350	rs830149	19	47991441	0.0042477	21.5979	C	G	0.184647	0.0397237	9.58e-06	5065	C	G	-0.0265	0.0334	0.4279	218792
genus.CandidatusSoleaferrea.id.11350	rs9973954	2	19885907	0.0033803	20.8356	A	G	0.0892075	0.0195401	5.95e-06	6145	A	G	-0.0068	0.0167	0.6834	218792
genus.Catenibacterium.id.2153	rs12404911	1	240118443	0.00656552	21.3931	C	T	0.140717	0.0304142	2.8e-06	3239	C	T	-0.0136	0.0204	0.5059	218792
genus.Catenibacterium.id.2153	rs212393	6	159485742	0.0068476	22.3185	G	A	-0.135254	0.0286209	3.62e-06	3239	G	A	-0.0219	0.0196	0.2629	218792
genus.Catenibacterium.id.2153	rs73128290	7	57364320	0.00637546	20.7698	A	G	0.129726	0.0284563	4.29e-06	3239	A	G	0.009	0.0173	0.6037	218792
genus.Catenibacterium.id.2153	rs7742829	6	105089665	0.0063356	20.6391	C	T	0.11411	0.0251099	5.61e-06	3239	C	T	-0.0198	0.016	0.2163	218792
genus.ChristensenellaceaeR.7group.id.11283	rs10461257	4	156131004	0.00127731	20.4439	A	G	-0.0551969	0.0122069	6.51e-06	15987	A	G	0.0216	0.0169	0.2018	218792
genus.ChristensenellaceaeR.7group.id.11283	rs17081797	18	67555560	0.0011994	19.6001	A	G	-0.0904325	0.0204253	3.34e-06	16324	A	G	0.0065	0.0322	0.8412	218792
genus.ChristensenellaceaeR.7group.id.11283	rs60954665	19	35884728	0.00123702	20.2156	T	G	0.049815	0.0110787	7.13e-06	16324	T	G	-0.0189	0.0158	0.2315	218792
genus.ChristensenellaceaeR.7group.id.11283	rs62132810	19	49279227	0.00141131	21.29	A	G	-0.0828853	0.0179623	5.67e-06	15066	A	G	0.0069	0.0229	0.7627	218792
genus.ChristensenellaceaeR.7group.id.11283	rs62190261	2	230943099	0.00130261	19.9193	A	C	0.0958394	0.0214723	8.74e-06	15274	A	C	-0.0346	0.0284	0.2234	218792
genus.ChristensenellaceaeR.7group.id.11283	rs62467127	7	118096925	0.00160968	20.5033	C	T	0.114108	0.0251983	3.25e-06	12719	C	T	0.0811	0.0502	0.1061	218792
genus.ChristensenellaceaeR.7group.id.11283	rs73952017	18	1779609	0.00128671	19.676	C	T	-0.0862164	0.0194354	8.46e-06	15274	C	T	-0.012	0.0261	0.6468	218792
genus.ChristensenellaceaeR.7group.id.11283	rs78521377	10	126448374	0.00163864	20.6857	C	T	0.124992	0.0274797	5.61e-06	12605	C	T	-0.0351	0.0459	0.4444	218792
genus.ChristensenellaceaeR.7group.id.11283	rs79150079	5	29437467	0.00167466	20.1163	C	A	0.121547	0.0270977	9.42e-06	11994	C	A	0.0243	0.0315	0.4403	218792
genus.ChristensenellaceaeR.7group.id.11283	rs892686	9	83043376	0.00130382	21.31	A	G	0.0514099	0.011136	3.97e-06	16325	A	G	-0.0044	0.0159	0.7843	218792
genus.ChristensenellaceaeR.7group.id.11283	rs999354	19	34076956	0.0014997	24.5148	T	A	0.0580248	0.0117185	7.01e-07	16324	T	A	-0.0179	0.0164	0.2751	218792
genus.Clostridiumsensustricto1.id.1873	rs11264403	1	155676492	0.00236745	17.2831	G	A	-0.139062	0.0334454	7.76e-06	7285	G	A	0.0341	0.0301	0.2571	218792
genus.Clostridiumsensustricto1.id.1873	rs115807074	5	84997131	0.00501259	21.295	A	G	-0.22736	0.0492575	4.32e-06	4229	A	G	0.0424	0.0764	0.579101	218792
genus.Clostridiumsensustricto1.id.1873	rs11586026	1	83252771	0.00149631	19.6206	A	T	0.110967	0.0250498	8.85e-06	13095	A	T	0.0635	0.0444	0.1529	218792
genus.Clostridiumsensustricto1.id.1873	rs116847295	12	43485015	0.00154659	19.9943	C	T	0.110021	0.0246032	4.58e-06	12910	C	T	0.0168	0.0238	0.4819	218792
genus.Clostridiumsensustricto1.id.1873	rs12341505	9	136710881	0.00143289	20.2558	G	A	0.0810718	0.0180121	4.82e-06	14118	G	A	0.0473	0.0272	0.0816094	218792
genus.Clostridiumsensustricto1.id.1873	rs12490337	3	111482845	0.00142167	20.1012	C	G	-0.0616879	0.0137581	7.49e-06	14121	C	G	0.0032	0.0198	0.8724	218792
genus.Clostridiumsensustricto1.id.1873	rs2795528	10	43270264	0.0034572	22.078	G	A	-0.184315	0.0392204	2.72e-06	6366	G	A	-0.0134	0.0349	0.7	218792
genus.Clostridiumsensustricto1.id.1873	rs2817172	1	3041519	0.0015943	21.8065	C	T	0.058139	0.0124492	2.77e-06	13658	C	T	-0.0193	0.0162	0.2334	218792
genus.Clostridiumsensustricto1.id.1873	rs550843	6	165722832	0.00151708	21.4233	T	C	-0.0783246	0.0169209	2.05e-06	14102	T	C	0.0066	0.0178	0.7112	218792
genus.Collinsella.id.815	rs10890671	11	107123199	0.00142438	20.4433	T	C	-0.0537401	0.0118848	6.52e-06	14334	T	C	0.0094	0.016	0.555	218792
genus.Collinsella.id.815	rs11597285	10	8589813	0.00138734	19.911	G	T	-0.0537947	0.0120548	9.38e-06	14334	G	T	-0.0009	0.0162	0.9565	218792
genus.Collinsella.id.815	rs12921100	16	77283458	0.00137242	19.6965	A	T	0.0563759	0.0127019	8.23e-06	14334	A	T	0	0.0179	0.9982	218792
genus.Collinsella.id.815	rs1496626	19	31760841	0.00139183	19.9755	T	C	-0.0722307	0.01616	6.78e-06	14334	T	C	-0.0101	0.0233	0.6652	218792
genus.Collinsella.id.815	rs149807560	19	56526640	0.00144857	19.5419	C	A	-0.104264	0.0235841	7.1e-06	13473	C	A	0.0163	0.0314	0.6041	218792
genus.Collinsella.id.815	rs2103510	21	29355467	0.00152295	21.8602	G	A	0.0786551	0.0168217	2.42e-06	14334	G	A	0.04	0.0247	0.1056	218792
genus.Collinsella.id.815	rs2671662	17	47529492	0.00157359	22.5883	C	G	-0.0567751	0.011945	2.22e-06	14334	C	G	0.0137	0.016	0.3904	218792
genus.Collinsella.id.815	rs59414781	15	50026113	0.00138944	19.9412	C	G	0.0668866	0.0149773	9.15e-06	14334	C	G	-0.026	0.0233	0.2632	218792
genus.Collinsella.id.815	rs62448871	7	24465024	0.00140476	20.1613	C	A	-0.0540309	0.0120324	6.78e-06	14334	C	A	0.0017	0.016	0.9152	218792
genus.Collinsella.id.815	rs73052258	2	195739311	0.00146757	21.0641	G	A	0.0930178	0.0202658	1.72e-06	14334	G	A	0.021	0.0299	0.4833	218792
genus.Collinsella.id.815	rs75672793	4	149818294	0.00162443	20.4995	A	G	-0.108908	0.0240522	6.14e-06	12601	A	G	-0.0306	0.0377	0.4167	218792
genus.Collinsella.id.815	rs9541268	13	68610061	0.00182855	23.6535	C	A	0.09597	0.0197312	8.79e-07	12914	C	A	0.0234	0.0275	0.3948	218792
genus.Coprobacter.id.949	rs11532348	12	98289796	0.00328806	20.9876	C	T	-0.103931	0.0226826	5.71e-06	6364	C	T	-0.0184	0.0223	0.4083	218792
genus.Coprobacter.id.949	rs12684609	9	137784868	0.00327873	20.9279	T	C	0.100827	0.0220366	6.1e-06	6364	T	C	-0.0148	0.02	0.459701	218792
genus.Coprobacter.id.949	rs12996055	2	137223458	0.00294084	19.3724	A	C	0.0921817	0.0209405	8.08e-06	6570	A	C	0.02	0.0181	0.2685	218792
genus.Coprobacter.id.949	rs143662916	11	103549974	0.00708064	21.971	C	T	0.253264	0.0540141	3.07e-06	3083	C	T	0.0059	0.0466	0.8998	218792
genus.Coprobacter.id.949	rs189356	20	57574851	0.00304329	20.6385	G	A	0.0781125	0.0171916	6.26e-06	6763	G	A	0.0185	0.0161	0.2508	218792
genus.Coprobacter.id.949	rs213863	6	97234939	0.00325385	22.1853	C	T	-0.0887412	0.0188377	2.35e-06	6798	C	T	0.0218	0.0165	0.1863	218792
genus.Coprobacter.id.949	rs305411	1	88233128	0.00350893	23.8567	A	G	0.129218	0.0264518	1.01e-06	6777	A	G	-0.0064	0.0262	0.8082	218792
genus.Coprobacter.id.949	rs3828477	3	46483717	0.00318606	21.7217	G	T	-0.091218	0.019569	2.89e-06	6798	G	T	0.0124	0.0167	0.457999	218792
genus.Coprobacter.id.949	rs5011652	15	91166608	0.00297358	20.224	G	C	0.0899597	0.020001	5.51e-06	6783	G	C	0.0149	0.0178	0.4044	218792
genus.Coprobacter.id.949	rs55672356	4	34852443	0.00443306	21.8232	T	A	-0.193354	0.0413815	2.74e-06	4903	T	A	0.0934	0.0454	0.0397704	218792
genus.Coprobacter.id.949	rs72821405	6	4714797	0.00342203	21.2036	T	C	-0.147365	0.0319978	4.76e-06	6177	T	C	-0.0507	0.0282	0.0720593	218792
genus.Coprobacter.id.949	rs74919520	2	32242452	0.00323028	20.6922	G	A	0.125703	0.0276296	5.76e-06	6387	G	A	-0.0061	0.0256	0.813	218792
genus.Coprobacter.id.949	rs76001613	4	3852385	0.00563389	19.1674	C	G	0.21591	0.0493019	9.13e-06	3385	C	G	0.0499	0.032	0.1187	218792
genus.Coprococcus1.id.11301	rs1010560	1	30400301	0.00133496	22.3517	C	A	0.0580232	0.0122722	1.96e-06	16723	C	A	0.0072	0.0179	0.687	218792
genus.Coprococcus1.id.11301	rs12794898	11	124554061	0.0013796	20.9767	G	T	0.0903299	0.0197212	4.92e-06	15186	G	T	0.0145	0.024	0.5443	218792
genus.Coprococcus1.id.11301	rs12886051	14	29898456	0.00117317	19.5339	G	C	-0.0521782	0.0118051	8.01e-06	16633	G	C	-0.0135	0.0174	0.4361	218792
genus.Coprococcus1.id.11301	rs1519491	2	22079770	0.00115355	19.3223	T	C	0.0499197	0.0113558	8.95e-06	16733	T	C	-0.0251	0.0162	0.1221	218792
genus.Coprococcus1.id.11301	rs1576241	6	72529277	0.00129595	21.7056	A	G	-0.0510343	0.0109535	3.33e-06	16729	A	G	0.0054	0.0163	0.741199	218792
genus.Coprococcus1.id.11301	rs1762123	6	150289707	0.00120407	20.1588	C	T	-0.0891532	0.0198554	8.01e-06	16724	C	T	0.0399	0.0262	0.1275	218792
genus.Coprococcus1.id.11301	rs2907920	19	2600717	0.00121915	19.5766	A	G	0.0561173	0.0126824	7.65e-06	16040	A	G	0.0215	0.0177	0.2251	218792
genus.Coprococcus1.id.11301	rs4277593	20	4319420	0.00170213	28.387	G	A	-0.0585649	0.0109914	1.14e-07	16651	G	A	0.0211	0.0161	0.1889	218792
genus.Coprococcus1.id.11301	rs56405618	4	174468316	0.00140803	23.0918	A	G	-0.08963	0.0186508	1.57e-06	16379	A	G	-0.0021	0.025	0.9323	218792
genus.Coprococcus1.id.11301	rs73031725	11	134622282	0.00307938	22.2524	T	C	0.167591	0.0355224	1.98e-06	7206	T	C	-0.0534	0.0456	0.2416	218792
genus.Coprococcus1.id.11301	rs73167075	3	165693143	0.00120476	20.1812	T	C	0.0573137	0.0127573	8.57e-06	16733	T	C	0.016	0.0194	0.4103	218792
genus.Coprococcus1.id.11301	rs74101919	1	95424321	0.00147439	24.7029	T	C	-0.0718989	0.0144651	1.03e-06	16732	T	C	0.0185	0.0255	0.4693	218792
genus.Coprococcus1.id.11301	rs7784490	7	132556835	0.00125386	21.0047	C	G	-0.0518543	0.0113136	4.55e-06	16733	C	G	-0.0058	0.0168	0.731301	218792
genus.Coprococcus1.id.11301	rs946513	10	15913820	0.00462666	20.0243	C	T	0.205899	0.0460018	8.62e-06	4310	C	T	-0.0563	0.0386	0.1443	218792
genus.Coprococcus2.id.11302	rs10070053	5	34794789	0.00167704	19.2697	A	G	0.0594312	0.0135375	7.65e-06	11473	A	G	0.0134	0.0161	0.4043	218792
genus.Coprococcus2.id.11302	rs12634070	3	180544880	0.0017376	19.9388	T	C	0.0736486	0.0164921	9.95e-06	11457	T	C	0.004	0.0182	0.8257	218792
genus.Coprococcus2.id.11302	rs1958519	14	86833255	0.00208978	23.0503	T	A	0.0665288	0.0138558	1.58e-06	11009	T	A	-0.0027	0.016	0.8636	218792
genus.Coprococcus2.id.11302	rs2482516	9	25554068	0.00182563	20.9984	C	T	0.0754415	0.0164619	4.72e-06	11483	C	T	0	0.019	0.9995	218792
genus.Coprococcus2.id.11302	rs35890118	10	129715759	0.00176583	20.3005	A	G	-0.066536	0.0147661	8.26e-06	11478	A	G	-0.0029	0.0182	0.8726	218792
genus.Coprococcus2.id.11302	rs59936925	20	49266770	0.00228528	25.033	A	T	0.117085	0.0233995	9.38e-07	10931	A	T	-0.0237	0.0253	0.3486	218792
genus.Coprococcus2.id.11302	rs61823518	1	223688236	0.00178311	19.6099	A	C	-0.0955381	0.0215724	6.68e-06	10980	A	C	-0.0178	0.026	0.4942	218792
genus.Coprococcus2.id.11302	rs6677933	1	112139008	0.00208524	23.9906	C	T	-0.0804405	0.0164216	1.19e-06	11483	C	T	-0.0074	0.0226	0.742099	218792
genus.Coprococcus2.id.11302	rs72680320	4	131125786	0.00197324	21.7623	T	C	-0.0649382	0.013919	2.27e-06	11009	T	C	0.0184	0.0168	0.2731	218792
genus.Coprococcus2.id.11302	rs9426473	1	4210455	0.00175935	20.24	A	G	0.0727361	0.0161662	6.31e-06	11486	A	G	-0.0313	0.0181	0.0831496	218792
genus.Coprococcus3.id.11303	rs10810043	9	13799809	0.00124751	19.7739	A	G	0.0515518	0.0115923	9.27e-06	15833	A	G	-0.0072	0.0169	0.6708	218792
genus.Coprococcus3.id.11303	rs11077359	17	76343961	0.00122148	18.8044	T	C	-0.0645443	0.0148833	9.64e-06	15378	T	C	0.0137	0.0214	0.5223	218792
genus.Coprococcus3.id.11303	rs11080344	17	26104511	0.00131851	20.9036	C	T	0.0516921	0.0113054	4.79e-06	15835	C	T	0.0109	0.0159	0.4951	218792
genus.Coprococcus3.id.11303	rs13247359	7	76357726	0.00129481	20.5247	G	A	0.051211	0.0113031	7.33e-06	15833	G	A	0.0042	0.016	0.7952	218792
genus.Coprococcus3.id.11303	rs13394391	2	240727657	0.00139311	22.0864	C	T	-0.0709302	0.0150918	2.2e-06	15834	C	T	0.0113	0.022	0.608199	218792
genus.Coprococcus3.id.11303	rs178271	22	21331556	0.00225275	24.3665	T	C	0.145257	0.0294239	7.81e-07	10794	T	C	-0.0149	0.0621	0.8106	218792
genus.Coprococcus3.id.11303	rs4575475	14	99141751	0.00133223	20.2128	G	A	0.0619514	0.0137787	7.04e-06	15154	G	A	-0.0098	0.0189	0.6062	218792
genus.Coprococcus3.id.11303	rs62481985	8	4128340	0.00165335	25.6197	G	C	-0.0582385	0.0115052	4.18e-07	15472	G	C	0.0061	0.0161	0.703301	218792
genus.Coprococcus3.id.11303	rs7521171	1	149998497	0.00137382	21.2822	G	A	-0.0596434	0.0129279	4.32e-06	15472	G	A	0.0024	0.0173	0.8895	218792
genus.Coprococcus3.id.11303	rs8100692	19	40032132	0.00163305	25.8885	T	C	0.0577411	0.0113476	4.16e-07	15829	T	C	0.013	0.016	0.4137	218792
genus.DefluviitaleaceaeUCG011.id.11287	rs112893842	9	8786663	0.00291203	23.8929	T	C	0.11381	0.0232806	1.45e-06	8183	T	C	0.0189	0.0278	0.4972	218792
genus.DefluviitaleaceaeUCG011.id.11287	rs1582238	1	118723685	0.0028936	23.1609	T	C	0.0805036	0.0167257	1.57e-06	7983	T	C	-0.0295	0.0166	0.07486	218792
genus.DefluviitaleaceaeUCG011.id.11287	rs28696126	7	79734541	0.00254701	19.9404	A	T	-0.106503	0.0238473	6.63e-06	7811	A	T	-0.0129	0.0237	0.5875	218792
genus.DefluviitaleaceaeUCG011.id.11287	rs2892880	4	120741726	0.00246984	20.2533	G	A	0.0817755	0.0181686	6.83e-06	8182	G	A	0.0013	0.0183	0.9418	218792
genus.DefluviitaleaceaeUCG011.id.11287	rs4344384	10	66407366	0.00255838	20.9761	G	T	0.0715978	0.0156309	4.83e-06	8180	G	T	0.0095	0.0159	0.5482	218792
genus.DefluviitaleaceaeUCG011.id.11287	rs4677103	3	72207794	0.00306906	24.5696	A	G	0.0977912	0.0197263	9.6e-07	7983	A	G	0.0094	0.021	0.653	218792
genus.DefluviitaleaceaeUCG011.id.11287	rs55658617	21	41811003	0.00346579	23.1659	T	C	0.174369	0.0362226	2.15e-06	6663	T	C	-0.0132	0.0434	0.760699	218792
genus.DefluviitaleaceaeUCG011.id.11287	rs72731813	4	147414743	0.00322957	25.1588	C	T	-0.147383	0.0293796	4.33e-07	7767	C	T	0.0446	0.037	0.2281	218792
genus.DefluviitaleaceaeUCG011.id.11287	rs9608282	22	24804081	0.00293758	22.7273	T	G	0.142939	0.0299793	2.52e-06	7716	T	G	0.0281	0.0445	0.5274	218792
genus.DefluviitaleaceaeUCG011.id.11287	rs9725395	1	85205632	0.00272765	21.9055	A	G	-0.13834	0.029554	3.52e-06	8011	A	G	0.0141	0.025	0.5729	218792
genus.Desulfovibrio.id.3173	rs11160353	14	97116904	0.00238321	22.0543	T	A	-0.0691756	0.0147285	2.7e-06	9234	T	A	0.0019	0.0161	0.9048	218792
genus.Desulfovibrio.id.3173	rs12031543	1	68664315	0.00229369	20.3527	T	C	-0.127185	0.0281887	6.55e-06	8855	T	C	0.0025	0.0232	0.9133	218792
genus.Desulfovibrio.id.3173	rs13066142	3	67478973	0.0024343	22.5453	G	A	0.119141	0.0250891	3.79e-06	9241	G	A	-0.0009	0.0276	0.9739	218792
genus.Desulfovibrio.id.3173	rs16863365	2	198089911	0.00264056	23.2296	A	G	0.109402	0.0226964	1.79e-06	8776	A	G	-0.0334	0.0375	0.3733	218792
genus.Desulfovibrio.id.3173	rs2032031	10	130170270	0.00209532	19.3993	A	G	-0.0654931	0.0148681	9.14e-06	9241	A	G	-0.02	0.0159	0.2085	218792
genus.Desulfovibrio.id.3173	rs2590913	13	64264446	0.0028598	20.7156	G	A	0.154496	0.0339396	6.65e-06	7225	G	A	-0.0213	0.0365	0.5592	218792
genus.Desulfovibrio.id.3173	rs2853179	8	105462047	0.00242095	21.7128	C	T	0.0811971	0.0174234	2.42e-06	8949	C	T	-0.0215	0.019	0.2588	218792
genus.Desulfovibrio.id.3173	rs4797774	18	13447995	0.00584988	20.4421	G	A	0.212582	0.0470044	5.64e-06	3476	G	A	0.0095	0.0399	0.8116	218792
genus.Desulfovibrio.id.3173	rs6580353	5	139410687	0.00222768	20.6275	T	C	0.0770979	0.0169735	4.94e-06	9241	T	C	0.0103	0.02	0.6072	218792
genus.Desulfovibrio.id.3173	rs72647089	8	57972916	0.0022028	19.8314	T	G	-0.106594	0.0239337	8.3e-06	8985	T	G	0.0305	0.0293	0.2973	218792
genus.Desulfovibrio.id.3173	rs7729080	5	52653978	0.00214528	19.8628	C	A	-0.070287	0.0157691	9.96e-06	9241	C	A	-0.0052	0.0174	0.763901	218792
genus.Dialister.id.2183	rs10138457	14	102458052	0.00169561	18.6257	T	C	-0.113054	0.0261933	7.88e-06	10968	T	C	-0.0049	0.0273	0.8575	218792
genus.Dialister.id.2183	rs10938938	4	23294359	0.00179331	20.4786	G	A	-0.0773514	0.0170915	7.37e-06	11401	G	A	-0.0048	0.0218	0.8252	218792
genus.Dialister.id.2183	rs11071887	15	32955095	0.00170664	20.4925	T	C	0.0662403	0.0146315	5.91e-06	11989	T	C	0.0004	0.0171	0.9831	218792
genus.Dialister.id.2183	rs11166701	8	138295725	0.00210288	24.6934	G	A	-0.0655301	0.013186	5.51e-07	11720	G	A	0.0091	0.0159	0.567799	218792
genus.Dialister.id.2183	rs2314294	16	9336862	0.00175907	19.9778	T	C	0.0865932	0.0193719	8.08e-06	11339	T	C	-0.0301	0.0232	0.1959	218792
genus.Dialister.id.2183	rs2435610	7	150890034	0.0016985	20.3861	A	C	0.0647131	0.0143314	5.93e-06	11984	A	C	0.0024	0.0183	0.8941	218792
genus.Dialister.id.2183	rs4747450	10	23199653	0.00170642	20.4864	C	A	0.0668509	0.0147685	5.84e-06	11987	C	A	-0.0152	0.019	0.4248	218792
genus.Dialister.id.2183	rs4753063	11	92267129	0.00175044	21.0194	G	A	-0.0596297	0.0130052	4.86e-06	11989	G	A	0.0103	0.0159	0.518	218792
genus.Dialister.id.2183	rs517089	11	10967286	0.00166629	20.0055	T	A	0.076227	0.0170411	5.14e-06	11988	T	A	0.0101	0.0211	0.632	218792
genus.Dialister.id.2183	rs75416973	1	172809633	0.00171091	19.5378	A	G	0.0727223	0.016451	9.46e-06	11402	A	G	0.0331	0.0192	0.0846896	218792
genus.Dialister.id.2183	rs764177	3	45809449	0.00164409	19.7385	C	A	-0.0601454	0.0135366	9.61e-06	11988	C	A	0.0005	0.0165	0.9771	218792
genus.Dialister.id.2183	rs76680460	9	25447080	0.00272387	19.5944	G	A	-0.161296	0.0364332	8.19e-06	7176	G	A	-0.0445	0.0397	0.2626	218792
genus.Dorea.id.1997	rs11150408	16	81803497	0.00116284	20.0393	T	G	0.0488254	0.0109063	7.06e-06	17215	T	G	0.0087	0.016	0.5848	218792
genus.Dorea.id.1997	rs12216169	6	116078810	0.00128669	20.7217	T	A	0.0881722	0.0193683	5.33e-06	16086	T	A	-0.0021	0.0248	0.9326	218792
genus.Dorea.id.1997	rs12537781	7	154978183	0.00111612	19.6724	T	C	-0.055544	0.0125223	9.15e-06	17608	T	C	0.039	0.0185	0.0355402	218792
genus.Dorea.id.1997	rs13279148	8	127905865	0.00127511	22.4744	G	A	0.0715309	0.0150878	2.25e-06	17605	G	A	-0.0047	0.0253	0.8534	218792
genus.Dorea.id.1997	rs1899291	4	60992340	0.00122079	21.5208	C	T	0.0697217	0.0150285	4.57e-06	17609	C	T	-0.002	0.0218	0.9254	218792
genus.Dorea.id.1997	rs3005511	6	74605806	0.00118636	20.9143	A	G	0.0516127	0.0112852	5.29e-06	17610	A	G	0.0112	0.0173	0.517299	218792
genus.Dorea.id.1997	rs345219	3	6826520	0.00113167	19.5015	T	G	-0.0497368	0.0112621	8.8e-06	17215	T	G	0.0115	0.0161	0.4729	218792
genus.Dorea.id.1997	rs3752849	11	8729057	0.00374984	20.0242	G	A	0.163846	0.036608	7.68e-06	5322	G	A	0.0489	0.0362	0.1767	218792
genus.Dorea.id.1997	rs4793307	17	70733523	0.00124723	21.9762	C	T	0.0574165	0.0122472	4.01e-06	17600	C	T	0.0239	0.0187	0.2017	218792
genus.Dorea.id.1997	rs62503162	8	15768657	0.00154684	25.11	A	G	-0.0974091	0.0194379	7.47e-07	16210	A	G	-0.0097	0.0392	0.8039	218792
genus.Dorea.id.1997	rs62583469	9	106815466	0.00118056	19.8769	T	A	-0.0634136	0.0142227	5.78e-06	16819	T	A	-0.0103	0.0231	0.6562	218792
genus.Dorea.id.1997	rs73729431	6	25078050	0.00218302	20.9897	C	T	-0.13745	0.0299983	3.17e-06	9596	C	T	0.05	0.056	0.3721	218792
genus.Eggerthella.id.819	rs112205261	1	9136139	0.00431788	21.8305	T	C	-0.188618	0.0403613	3.35e-06	5036	T	C	-0.0467	0.0291	0.1087	218792
genus.Eggerthella.id.819	rs13070736	3	20807454	0.00385035	19.8866	A	C	-0.121331	0.0272024	7.62e-06	5147	A	C	-0.0105	0.0215	0.6259	218792
genus.Eggerthella.id.819	rs1784446	11	102461599	0.00406292	20.989	G	A	0.0907728	0.0198096	5.23e-06	5147	G	A	-0.0078	0.0158	0.623199	218792
genus.Eggerthella.id.819	rs2223081	21	29778032	0.00416372	21.5119	G	A	0.102572	0.0221108	3.89e-06	5147	G	A	0.0026	0.0177	0.8849	218792
genus.Eggerthella.id.819	rs2240838	7	38335954	0.00475922	24.6033	A	G	0.0980582	0.0197653	7.36e-07	5147	A	G	-0.022	0.016	0.1701	218792
genus.Eggerthella.id.819	rs3851328	2	45453805	0.0040176	20.754	T	G	-0.107774	0.0236527	4.18e-06	5147	T	G	0.0231	0.0191	0.2263	218792
genus.Eggerthella.id.819	rs4985746	17	17098213	0.00404322	19.9084	G	A	0.110522	0.0247653	5.71e-06	4906	G	A	0.0029	0.0263	0.9116	218792
genus.Eggerthella.id.819	rs6430926	2	141337454	0.0038546	19.9087	C	T	0.0879736	0.0197127	8.37e-06	5147	C	T	-0.0003	0.016	0.9852	218792
genus.Eggerthella.id.819	rs67490567	15	65691324	0.00382895	19.5297	T	C	0.108495	0.0245457	8.94e-06	5083	T	C	0.055	0.0184	0.00272402	218792
genus.Eggerthella.id.819	rs76663501	20	55647869	0.00443674	21.4448	C	T	0.175349	0.0378576	4.83e-06	4814	C	T	-0.0435	0.036	0.227	218792
genus.Eisenbergiella.id.11304	rs11027642	11	24001840	0.00366052	20.5044	C	T	0.129006	0.0284844	4.92e-06	5583	C	T	-0.0162	0.0226	0.4737	218792
genus.Eisenbergiella.id.11304	rs11079158	17	53367641	0.0035559	19.9128	T	C	0.100627	0.022546	7.35e-06	5582	T	C	0.0178	0.0193	0.355	218792
genus.Eisenbergiella.id.11304	rs11938607	4	189060431	0.00363813	20.3786	T	C	0.0978125	0.0216636	8.22e-06	5583	T	C	0.0042	0.0182	0.8197	218792
genus.Eisenbergiella.id.11304	rs12257723	10	109417101	0.00361978	20.2717	A	C	-0.0952742	0.0211569	8.85e-06	5582	A	C	0.0081	0.0169	0.632501	218792
genus.Eisenbergiella.id.11304	rs12278566	11	124764527	0.00412883	23.1344	T	A	-0.121065	0.0251658	1.65e-06	5582	T	A	0.0191	0.018	0.2883	218792
genus.Eisenbergiella.id.11304	rs12710729	2	19973210	0.00359448	20.1332	C	A	0.0893384	0.0199069	9.84e-06	5583	C	A	0.0317	0.017	0.0622802	218792
genus.Eisenbergiella.id.11304	rs13258851	8	55330814	0.00366957	20.5553	A	G	0.137001	0.0302124	7.75e-06	5583	A	G	0.0349	0.0227	0.1253	218792
genus.Eisenbergiella.id.11304	rs1508033	15	53375201	0.00390284	21.8553	A	C	0.091546	0.0195787	3.23e-06	5580	A	C	-0.0176	0.0173	0.3066	218792
genus.Eisenbergiella.id.11304	rs1553971	3	111419486	0.00377325	21.1383	T	G	0.120965	0.0263054	5.27e-06	5583	T	G	-0.0178	0.0191	0.3515	218792
genus.Eisenbergiella.id.11304	rs2683098	15	36178565	0.00405372	22.7118	C	T	0.107319	0.022515	2.24e-06	5582	C	T	0.0044	0.0193	0.8195	218792
genus.Eisenbergiella.id.11304	rs3812426	8	50822676	0.0040229	22.5425	G	A	0.106447	0.0224159	2.72e-06	5583	G	A	-0.0235	0.022	0.2844	218792
genus.Eisenbergiella.id.11304	rs4462860	21	21610254	0.00397769	21.7969	G	A	0.0939071	0.0201104	4.16e-06	5460	G	A	0.0091	0.0163	0.577801	218792
genus.Enterorhabdus.id.820	rs10098492	8	113109756	0.00275021	20.2946	T	C	0.132323	0.0293688	6.41e-06	7361	T	C	0.0513	0.0339	0.13	218792
genus.Enterorhabdus.id.820	rs11098863	4	127336602	0.00466477	35.2528	T	A	-0.0966008	0.0162677	3.06e-09	7524	T	A	0.0016	0.0159	0.9181	218792
genus.Enterorhabdus.id.820	rs114731706	2	19611953	0.00380363	22.7333	T	G	0.182308	0.0382298	2.17e-06	5956	T	G	-0.0489	0.0452	0.2797	218792
genus.Enterorhabdus.id.820	rs2051957	7	89709883	0.00261507	19.7221	C	T	0.0843291	0.0189864	8.9e-06	7524	C	T	-0.0241	0.0199	0.227	218792
genus.Enterorhabdus.id.820	rs3017103	11	62174193	0.00291916	22.0222	A	G	0.0980897	0.0208995	2.94e-06	7524	A	G	-0.0151	0.0202	0.4551	218792
genus.Enterorhabdus.id.820	rs73331712	12	69515102	0.00721335	22.5747	T	C	0.26199	0.055123	4.85e-06	3109	T	C	0.0145	0.0396	0.7142	218792
genus.Enterorhabdus.id.820	rs77655283	2	236439879	0.00264506	19.8694	G	A	0.132988	0.0298306	5.88e-06	7494	G	A	-0.0297	0.0313	0.3428	218792
genus.Enterorhabdus.id.820	rs7923280	10	20280612	0.00342407	25.8443	A	T	0.0860019	0.0169148	5.24e-07	7524	A	T	-0.0006	0.0177	0.9735	218792
genus.Enterorhabdus.id.820	rs9470637	6	37567189	0.00273687	20.6432	A	T	-0.0755513	0.0166263	5.7e-06	7524	A	T	0.0058	0.0159	0.7171	218792
genus.Erysipelatoclostridium.id.11381	rs1434153	2	34595533	0.00208253	20.1593	G	A	-0.0684526	0.0152443	6.85e-06	9662	G	A	0.0064	0.016	0.6899	218792
genus.Erysipelatoclostridium.id.11381	rs16936671	10	36394609	0.00207611	19.735	C	T	-0.0968026	0.0217883	6.04e-06	9488	C	T	-0.0061	0.023	0.7915	218792
genus.Erysipelatoclostridium.id.11381	rs17804233	5	77815056	0.00215554	21.1289	T	C	-0.0662914	0.0144203	4.59e-06	9783	T	C	0.0042	0.0159	0.7938	218792
genus.Erysipelatoclostridium.id.11381	rs2901723	11	36871523	0.00204043	19.7508	C	A	0.0641339	0.0144295	8.79e-06	9662	C	A	0.0254	0.016	0.1118	218792
genus.Erysipelatoclostridium.id.11381	rs340991	5	34892042	0.00221555	21.714	A	G	-0.0740482	0.0158891	3.75e-06	9781	A	G	-0.0046	0.0179	0.7997	218792
genus.Erysipelatoclostridium.id.11381	rs34528142	17	71411325	0.00208287	20.0414	C	G	-0.0875551	0.0195556	6.13e-06	9604	C	G	-0.0149	0.0198	0.4508	218792
genus.Erysipelatoclostridium.id.11381	rs3804326	6	24292185	0.00251083	17.6855	A	G	0.14147	0.0336352	9.85e-06	7028	A	G	-0.0537	0.0369	0.1454	218792
genus.Erysipelatoclostridium.id.11381	rs45480394	19	55857777	0.00212794	20.4761	T	G	-0.0687134	0.0151835	7.66e-06	9604	T	G	-0.0133	0.0166	0.4223	218792
genus.Erysipelatoclostridium.id.11381	rs4697572	4	25446787	0.00251333	24.6347	A	G	-0.0810636	0.0163308	7.59e-07	9779	A	G	-0.0088	0.0199	0.6595	218792
genus.Erysipelatoclostridium.id.11381	rs58236560	11	121876913	0.00239428	22.4786	G	T	-0.111157	0.0234426	2.16e-06	9368	G	T	-0.0045	0.0244	0.8548	218792
genus.Erysipelatoclostridium.id.11381	rs61806970	1	167818597	0.00228061	19.754	C	T	0.142548	0.0320688	9.09e-06	8644	C	T	-0.0157	0.0315	0.617701	218792
genus.Erysipelatoclostridium.id.11381	rs622418	9	90586043	0.00221895	21.7518	A	G	-0.0668051	0.0143224	3.68e-06	9783	A	G	0.0238	0.0159	0.1339	218792
genus.Erysipelatoclostridium.id.11381	rs6474512	8	38780606	0.0022336	21.8958	A	C	0.067015	0.0143201	3.02e-06	9783	A	C	-0.0059	0.0163	0.7171	218792
genus.Erysipelatoclostridium.id.11381	rs710230	1	42333631	0.00286895	25.9352	T	C	0.143381	0.0281514	6.33e-07	9016	T	C	0.0274	0.0308	0.3736	218792
genus.Erysipelatoclostridium.id.11381	rs7221249	17	10177708	0.00352693	34.6119	A	G	0.0839861	0.0142741	4.31e-09	9781	A	G	0.0116	0.0159	0.4662	218792
genus.Erysipelatoclostridium.id.11381	rs9590927	13	46372065	0.00206806	20.2675	G	A	-0.0646003	0.0143479	6.39e-06	9782	G	A	0.0072	0.0159	0.653501	218792
genus.ErysipelotrichaceaeUCG003.id.11384	rs10164067	18	46614602	0.00163549	23.6306	T	G	-0.10326	0.0212405	1.13e-06	14427	T	G	0.0379	0.0357	0.2884	218792
genus.ErysipelotrichaceaeUCG003.id.11384	rs11666127	19	57828980	0.0014359	19.8597	A	G	-0.0719187	0.0161371	7.9e-06	13813	A	G	0.0152	0.021	0.4699	218792
genus.ErysipelotrichaceaeUCG003.id.11384	rs11994308	8	91660344	0.00166797	22.6488	C	T	0.115417	0.0242503	1.33e-06	13558	C	T	0.0168	0.0279	0.5466	218792
genus.ErysipelotrichaceaeUCG003.id.11384	rs12251396	10	873148	0.00138716	19.7376	A	G	-0.0705399	0.0158766	9.52e-06	14211	A	G	-0.0081	0.022	0.7136	218792
genus.ErysipelotrichaceaeUCG003.id.11384	rs17798136	7	33684926	0.00280395	20.861	G	A	0.158818	0.0347674	3.24e-06	7421	G	A	-0.0684	0.0323	0.0338298	218792
genus.ErysipelotrichaceaeUCG003.id.11384	rs28568391	10	125628540	0.00165993	24.1788	A	G	-0.0583911	0.0118741	6.42e-07	14544	A	G	0.0038	0.016	0.8139	218792
genus.ErysipelotrichaceaeUCG003.id.11384	rs4758231	11	7765096	0.00137072	20.4353	G	T	-0.0551754	0.0122047	6.55e-06	14890	G	T	0.0046	0.0177	0.7939	218792
genus.ErysipelotrichaceaeUCG003.id.11384	rs59068084	4	113256737	0.00151504	22.0651	T	G	0.0564772	0.0120224	3.12e-06	14544	T	G	0.016	0.0163	0.326	218792
genus.ErysipelotrichaceaeUCG003.id.11384	rs59104037	18	43034126	0.00145174	21.5838	A	G	-0.0951263	0.0204742	4.48e-06	14848	A	G	-0.0062	0.0239	0.7968	218792
genus.ErysipelotrichaceaeUCG003.id.11384	rs62403464	6	24220160	0.0014649	21.8546	T	C	-0.0731743	0.0156516	3.44e-06	14899	T	C	0.0085	0.0206	0.680801	218792
genus.ErysipelotrichaceaeUCG003.id.11384	rs6875357	5	32345671	0.00310713	21.9175	C	T	0.165673	0.0353831	6.7e-06	7034	C	T	-0.0432	0.0412	0.2944	218792
genus.ErysipelotrichaceaeUCG003.id.11384	rs73074432	7	20554814	0.00135344	19.2652	C	T	0.072154	0.0164378	9.99e-06	14217	C	T	-0.0063	0.0254	0.8026	218792
genus.ErysipelotrichaceaeUCG003.id.11384	rs74988980	16	80167277	0.00244845	14.5844	G	A	-0.133141	0.0348574	8.64e-06	5944	G	A	0.056	0.0393	0.1543	218792
genus.ErysipelotrichaceaeUCG003.id.11384	rs75949021	2	175403951	0.00304887	20.548	T	C	-0.169667	0.0374238	3.58e-06	6721	T	C	-0.043	0.0406	0.289	218792
genus.ErysipelotrichaceaeUCG003.id.11384	rs76502207	15	86522244	0.00231848	24.9537	T	C	0.144844	0.0289929	6.41e-07	10740	T	C	-0.0129	0.0404	0.7484	218792
genus.ErysipelotrichaceaeUCG003.id.11384	rs79396538	14	47935928	0.00142984	19.6855	C	G	0.0848148	0.0191146	8.63e-06	13750	C	G	-0.0183	0.0342	0.5933	218792
genus.ErysipelotrichaceaeUCG003.id.11384	rs8053479	16	4076830	0.00146011	20.195	A	G	-0.0838212	0.0186509	5.83e-06	13813	A	G	0.0373	0.025	0.1352	218792
genus.Escherichia.Shigella.id.3504	rs112767262	16	3750623	0.00170257	20.0717	T	C	0.0732963	0.0163589	8.21e-06	11771	T	C	-0.0111	0.0192	0.5616	218792
genus.Escherichia.Shigella.id.3504	rs113127095	13	23253392	0.00257829	21.7938	A	G	0.151009	0.0323434	3.33e-06	8433	A	G	0.023	0.04	0.564901	218792
genus.Escherichia.Shigella.id.3504	rs113513883	7	140678199	0.00325541	20.5042	A	G	0.172283	0.038041	5.28e-06	6280	A	G	0.02	0.0448	0.655	218792
genus.Escherichia.Shigella.id.3504	rs1154904	11	134774845	0.00183325	22.0395	A	G	-0.0613376	0.0130644	3.04e-06	12002	A	G	-0.0278	0.0158	0.0795701	218792
genus.Escherichia.Shigella.id.3504	rs11706043	3	3173016	0.00176687	21.2381	T	A	0.075657	0.0164155	5.87e-06	12001	T	A	0.0021	0.0193	0.9129	218792
genus.Escherichia.Shigella.id.3504	rs117092367	10	69394914	0.0019066	19.6793	A	T	0.117362	0.0264533	9.65e-06	10304	A	T	-0.0205	0.0321	0.5225	218792
genus.Escherichia.Shigella.id.3504	rs118526	5	79863544	0.00160946	19.1045	C	A	-0.0594401	0.013598	8e-06	11853	C	A	-0.0225	0.0174	0.1942	218792
genus.Escherichia.Shigella.id.3504	rs2267739	7	31136897	0.00198938	23.6231	G	C	0.115505	0.0237628	1.42e-06	11853	G	C	0.0217	0.0252	0.3889	218792
genus.Escherichia.Shigella.id.3504	rs2798105	1	48961903	0.00182289	20.6253	A	G	-0.100851	0.0222045	8.25e-06	11296	A	G	0.0309	0.0265	0.2444	218792
genus.Escherichia.Shigella.id.3504	rs35555519	16	77711641	0.00174113	20.93	C	G	0.101976	0.0222883	4.92e-06	12002	C	G	-0.0307	0.0267	0.2513	218792
genus.Escherichia.Shigella.id.3504	rs4731451	7	128054100	0.00169381	20.3585	G	A	-0.0609885	0.0135157	7.47e-06	12001	G	A	-0.0119	0.0171	0.4838	218792
genus.Escherichia.Shigella.id.3504	rs57024273	2	236515155	0.00168684	20.0246	T	C	0.0626172	0.0139919	9.7e-06	11853	T	C	-0.0027	0.0182	0.881	218792
genus.Escherichia.Shigella.id.3504	rs592299	9	136179347	0.00173958	20.8992	T	C	-0.0592004	0.0129486	4.77e-06	11995	T	C	0.037	0.0159	0.0204998	218792
genus.Escherichia.Shigella.id.3504	rs73208162	21	39324484	0.0020788	23.0623	A	G	-0.119296	0.024839	2.19e-06	11073	A	G	-0.0261	0.0448	0.56	218792
genus.Escherichia.Shigella.id.3504	rs7502686	17	14173290	0.00202958	20.3127	G	C	-0.136384	0.0302576	5.9e-06	9990	G	C	-0.019	0.0329	0.5632	218792
genus.Faecalibacterium.id.2057	rs10927394	1	245267339	0.00584529	20.5376	G	T	-0.232262	0.0512364	7.02e-06	3495	G	T	0.1145	0.0575	0.0462498	218792
genus.Faecalibacterium.id.2057	rs114946999	2	37125235	0.00131575	20.6463	C	T	-0.0861565	0.01896	5.7e-06	15673	C	T	0.0034	0.0239	0.8857	218792
genus.Faecalibacterium.id.2057	rs11776390	8	38593645	0.00124222	20.7907	T	C	-0.078354	0.017183	6.4e-06	16718	T	C	0.0236	0.032	0.4598	218792
genus.Faecalibacterium.id.2057	rs12320842	12	83502773	0.00189304	33.4489	C	G	0.094833	0.0163962	7.57e-09	17638	C	G	-0.0324	0.0234	0.1656	218792
genus.Faecalibacterium.id.2057	rs1271565	14	64044097	0.00131336	23.1929	C	T	-0.0576251	0.0119649	1.3e-06	17638	C	T	-0.015	0.0181	0.4055	218792
genus.Faecalibacterium.id.2057	rs12753492	1	14201546	0.00104285	18.2929	A	C	0.0641305	0.0149933	8.8e-06	17525	A	C	-0.0055	0.0253	0.828	218792
genus.Faecalibacterium.id.2057	rs2835874	21	39027901	0.00110537	19.4374	T	C	-0.0866356	0.0196496	7.54e-06	17567	T	C	0.0827	0.0426	0.0522601	218792
genus.Faecalibacterium.id.2057	rs28376661	15	47404021	0.00117655	21.303	C	G	0.0504817	0.0109368	3.66e-06	18087	C	G	0.0177	0.0173	0.3057	218792
genus.Faecalibacterium.id.2057	rs61875484	10	128614990	0.00118464	19.8259	C	G	0.0817953	0.018369	9.18e-06	16718	C	G	-0.0231	0.0271	0.394	218792
genus.Faecalibacterium.id.2057	rs6910935	6	131587157	0.00187142	23.6954	A	G	0.134864	0.0277032	1.38e-06	12640	A	G	0.0364	0.0331	0.2714	218792
genus.Faecalibacterium.id.2057	rs75499067	16	6099863	0.00525295	23.8899	C	T	0.227585	0.0465522	1.76e-06	4526	C	T	0.0208	0.0303	0.4925	218792
genus.Faecalibacterium.id.2057	rs79656633	1	111036827	0.00223354	20.3215	T	C	0.145631	0.0323019	8.14e-06	9080	T	C	-0.038	0.0265	0.1526	218792
genus.Faecalibacterium.id.2057	rs9536330	13	53567017	0.00110628	20.0237	T	C	-0.048317	0.010797	5.33e-06	18082	T	C	-0.0083	0.0159	0.6003	218792
genus.FamilyXIIIAD3011group.id.11293	rs11126423	2	74195551	0.00154303	21.2232	C	T	0.0904399	0.0196301	5.91e-06	13735	C	T	0.0334	0.0278	0.2301	218792
genus.FamilyXIIIAD3011group.id.11293	rs11736617	4	38917830	0.00141151	19.4724	G	A	-0.0759493	0.0172101	9.02e-06	13778	G	A	0.0356	0.0347	0.3051	218792
genus.FamilyXIIIAD3011group.id.11293	rs12812672	12	18127597	0.00156579	21.2701	T	C	-0.096065	0.020828	2.56e-06	13565	T	C	-0.0132	0.0306	0.6669	218792
genus.FamilyXIIIAD3011group.id.11293	rs12911842	15	40047706	0.00138676	19.6125	A	T	-0.0811976	0.0183335	6.91e-06	14125	A	T	-0.0032	0.0284	0.91	218792
genus.FamilyXIIIAD3011group.id.11293	rs149302	5	14159925	0.00142979	20.3178	T	C	-0.0645635	0.0143225	7.48e-06	14192	T	C	0.0206	0.0188	0.2744	218792
genus.FamilyXIIIAD3011group.id.11293	rs16840310	1	240694163	0.00174191	24.7765	A	G	-0.0608052	0.0122149	6.75e-07	14201	A	G	-0.0061	0.0161	0.704901	218792
genus.FamilyXIIIAD3011group.id.11293	rs16940167	15	58683697	0.00147581	20.986	C	T	0.0732552	0.0159898	3.91e-06	14201	C	T	-0.0078	0.0202	0.697999	218792
genus.FamilyXIIIAD3011group.id.11293	rs17156849	7	28603985	0.00158385	21.178	G	A	-0.112891	0.0245292	4.19e-06	13352	G	A	0.0582	0.0334	0.0817692	218792
genus.FamilyXIIIAD3011group.id.11293	rs62029761	16	16006242	0.00224885	21.757	A	G	0.128753	0.0276002	3.89e-06	9655	A	G	0.02	0.0355	0.5724	218792
genus.FamilyXIIIAD3011group.id.11293	rs62200412	20	4618639	0.00174603	23.8908	C	T	-0.0800851	0.0163834	5.8e-07	13661	C	T	-0.0353	0.0184	0.0545595	218792
genus.FamilyXIIIAD3011group.id.11293	rs72730932	1	192019835	0.00196516	25.7943	C	A	-0.0899559	0.0177107	6.89e-07	13102	C	A	-0.0422	0.0271	0.1201	218792
genus.FamilyXIIIAD3011group.id.11293	rs739451	9	136678954	0.00136365	19.3834	C	T	0.0649589	0.0147534	7.88e-06	14197	C	T	0.027	0.0195	0.1663	218792
genus.FamilyXIIIAD3011group.id.11293	rs9276029	6	32695336	0.00140577	19.0947	A	G	-0.0811384	0.0185669	8.93e-06	13566	A	G	0.0059	0.0215	0.782099	218792
genus.FamilyXIIIAD3011group.id.11293	rs9837139	3	29811865	0.00147562	19.9872	A	G	0.10752	0.0240482	8.71e-06	13527	A	G	-0.0084	0.0287	0.7691	218792
genus.FamilyXIIIAD3011group.id.11293	rs9852893	3	3556826	0.00182844	25.9785	C	G	0.0657834	0.0129056	3.88e-07	14184	C	G	0.0043	0.0178	0.8107	218792
genus.FamilyXIIIUCG001.id.11294	rs112362903	17	33761027	0.00232596	19.9963	A	G	-0.149047	0.0333271	7.88e-06	8579	A	G	-0.0396	0.0431	0.3579	218792
genus.FamilyXIIIUCG001.id.11294	rs116979587	15	25151194	0.00181207	21.7608	T	A	-0.121679	0.0260821	3.05e-06	11989	T	A	0.043	0.037	0.245	218792
genus.FamilyXIIIUCG001.id.11294	rs12049454	1	85228325	0.00182532	23.3081	T	C	-0.0647298	0.0134065	1.17e-06	12748	T	C	-0.0036	0.0163	0.8255	218792
genus.FamilyXIIIUCG001.id.11294	rs1426266	3	188224096	0.00184324	23.5429	T	C	-0.0665521	0.0137151	1.25e-06	12751	T	C	0.0074	0.0178	0.6784	218792
genus.FamilyXIIIUCG001.id.11294	rs2276529	21	45153079	0.0016569	21.1539	C	G	-0.0759406	0.0165099	5.36e-06	12748	C	G	0.0126	0.0198	0.5235	218792
genus.FamilyXIIIUCG001.id.11294	rs3842897	1	183503664	0.00173236	21.5272	G	A	-0.112639	0.0242751	5.2e-06	12407	G	A	0.0283	0.028	0.3131	218792
genus.FamilyXIIIUCG001.id.11294	rs62414802	6	76598635	0.00161904	20.673	C	T	-0.0611904	0.013457	4.29e-06	12750	C	T	0.0258	0.0183	0.1579	218792
genus.FamilyXIIIUCG001.id.11294	rs7119679	11	94681786	0.00171891	21.4252	G	A	-0.0809085	0.0174782	3.52e-06	12445	G	A	-0.0054	0.0188	0.7732	218792
genus.FamilyXIIIUCG001.id.11294	rs76463770	3	45479090	0.00373017	21.1506	A	G	0.19313	0.0419866	3.77e-06	5651	A	G	-0.0344	0.0464	0.457999	218792
genus.FamilyXIIIUCG001.id.11294	rs8076666	17	78223817	0.00163037	20.0259	A	G	0.088655	0.0198094	8.02e-06	12265	A	G	0.0059	0.0244	0.8099	218792
genus.Flavonifractor.id.2059	rs114873521	5	168218403	0.00213181	19.5563	C	T	-0.130067	0.0294087	7.13e-06	9156	C	T	-0.0368	0.031	0.2342	218792
genus.Flavonifractor.id.2059	rs11642826	16	6696929	0.00249595	20.3904	G	C	0.14686	0.0325191	6.65e-06	8151	G	C	-0.0082	0.0275	0.764499	218792
genus.Flavonifractor.id.2059	rs11811696	1	237351354	0.00226377	23.1859	T	C	-0.116063	0.0241012	2.07e-06	10221	T	C	0.0036	0.0289	0.8995	218792
genus.Flavonifractor.id.2059	rs12030302	1	77887835	0.00234163	25.356	A	G	-0.0692276	0.0137467	5.61e-07	10805	A	G	-0.0072	0.0159	0.6488	218792
genus.Flavonifractor.id.2059	rs12038887	1	102287083	0.00187121	19.8364	C	G	0.0942719	0.0211646	9.37e-06	10583	C	G	0.0113	0.0235	0.630199	218792
genus.Flavonifractor.id.2059	rs34066017	11	44849689	0.00213261	22.8741	A	G	0.0764294	0.0159789	1.52e-06	10705	A	G	-0.0318	0.0196	0.1059	218792
genus.Flavonifractor.id.2059	rs6761463	2	50201547	0.00188521	20.4043	G	C	-0.083392	0.0184596	8.11e-06	10805	G	C	0.0401	0.0231	0.0823095	218792
genus.Flavonifractor.id.2059	rs806808	10	32381186	0.00220573	23.8723	T	C	0.0667272	0.0136557	1.18e-06	10801	T	C	0.0315	0.016	0.0488495	218792
genus.Fusicatenibacter.id.11305	rs10439674	21	42681392	0.00111301	19.3645	A	G	-0.0572129	0.0130007	7.68e-06	17381	A	G	-0.0168	0.0197	0.3952	218792
genus.Fusicatenibacter.id.11305	rs167879	20	55937366	0.00118685	19.6538	C	T	-0.0659543	0.0148763	5.87e-06	16542	C	T	0.0432	0.0224	0.05332	218792
genus.Fusicatenibacter.id.11305	rs1864685	17	70721782	0.00120433	20.9468	A	C	-0.0494799	0.0108105	4.96e-06	17374	A	C	-0.0015	0.0161	0.9254	218792
genus.Fusicatenibacter.id.11305	rs2025938	10	112177119	0.00141693	22.1695	G	A	-0.0967298	0.0205426	2.99e-06	15626	G	A	0.0043	0.0322	0.8939	218792
genus.Fusicatenibacter.id.11305	rs2039204	9	130371107	0.00122013	21.233	T	A	-0.0497414	0.0107941	3.94e-06	17383	T	A	-0.0303	0.0165	0.0663896	218792
genus.Fusicatenibacter.id.11305	rs206581	18	10370596	0.00113467	19.7453	A	G	-0.0568339	0.0127894	8.96e-06	17384	A	G	0.0034	0.0193	0.861	218792
genus.Fusicatenibacter.id.11305	rs2132128	8	15360718	0.00133245	23.1729	G	A	-0.0771914	0.0160344	1.08e-06	17370	G	A	0.043	0.0264	0.1039	218792
genus.Fusicatenibacter.id.11305	rs3303	10	120447429	0.00129232	21.8361	T	C	-0.0953657	0.020407	3.94e-06	16877	T	C	0.0168	0.0326	0.607	218792
genus.Fusicatenibacter.id.11305	rs4378146	1	24927625	0.0013924	24.2364	A	C	-0.0616691	0.0125259	7.2e-07	17384	A	C	-0.02	0.0182	0.2727	218792
genus.Fusicatenibacter.id.11305	rs60254196	7	148856720	0.00119268	20.2711	A	G	-0.0492427	0.0109365	5.47e-06	16978	A	G	0.0098	0.016	0.541	218792
genus.Fusicatenibacter.id.11305	rs62187631	2	226649570	0.00120372	19.9094	T	C	-0.0710571	0.015924	4.55e-06	16522	T	C	-0.0189	0.0202	0.35	218792
genus.Fusicatenibacter.id.11305	rs62353480	5	29595000	0.00143783	23.2069	A	G	-0.0701397	0.0145589	1.57e-06	16119	A	G	-0.0216	0.0212	0.3074	218792
genus.Fusicatenibacter.id.11305	rs6515626	20	25257001	0.00260813	20.3809	G	A	0.141575	0.0313559	7.29e-06	7796	G	A	0.0135	0.0319	0.671699	218792
genus.Fusicatenibacter.id.11305	rs704418	3	64252803	0.00143764	23.9337	T	C	0.0739124	0.0151073	7.77e-07	16626	T	C	-0.0549	0.0241	0.0226898	218792
genus.Fusicatenibacter.id.11305	rs73103914	12	58658311	0.00113398	19.7333	A	G	-0.0597324	0.0134458	8.3e-06	17384	A	G	0.029	0.0222	0.1914	218792
genus.Fusicatenibacter.id.11305	rs792108	2	5532793	0.00117302	19.9366	T	C	-0.0508345	0.0113843	8.5e-06	16978	T	C	0.0241	0.0161	0.1356	218792
genus.Fusicatenibacter.id.11305	rs8028026	15	88353215	0.0011643	19.2566	A	G	-0.0792146	0.0180505	8.06e-06	16522	A	G	-0.0178	0.0274	0.5164	218792
genus.Fusicatenibacter.id.11305	rs8063430	16	73821805	0.00140773	21.9211	T	C	-0.104026	0.022217	4.93e-06	15552	T	C	-0.0018	0.0363	0.9604	218792
genus.Fusicatenibacter.id.11305	rs9905659	17	70697344	0.00116949	20.3518	G	A	-0.061617	0.0136576	7.31e-06	17384	G	A	-0.0378	0.0206	0.0663101	218792
genus.Gordonibacter.id.821	rs117347059	7	129433205	0.00546295	20.2251	G	C	-0.128261	0.0285123	9.17e-06	3684	G	C	0.0068	0.0204	0.740099	218792
genus.Gordonibacter.id.821	rs13412653	2	30158494	0.00540424	20.2184	A	C	0.107597	0.0239228	8.61e-06	3723	A	C	-0.013	0.0164	0.4278	218792
genus.Gordonibacter.id.821	rs16955299	17	52957210	0.00571387	20.5157	G	A	-0.196423	0.0433538	6.37e-06	3572	G	A	-0.0295	0.0268	0.2708	218792
genus.Gordonibacter.id.821	rs322296	7	136937189	0.0062031	22.4268	G	A	0.17869	0.037722	4.02e-06	3595	G	A	-0.0082	0.0301	0.785599	218792
genus.Gordonibacter.id.821	rs35042269	4	8142607	0.00552842	19.974	C	A	-0.180293	0.0403296	8.11e-06	3595	C	A	0.0095	0.025	0.702901	218792
genus.Gordonibacter.id.821	rs3765837	1	210628449	0.0054115	19.3371	T	G	-0.190729	0.0433608	7.17e-06	3556	T	G	-0.0112	0.0308	0.7173	218792
genus.Gordonibacter.id.821	rs4596722	9	88787144	0.00527645	19.7378	A	G	0.102908	0.0231571	9.06e-06	3723	A	G	0.0081	0.0159	0.6078	218792
genus.Gordonibacter.id.821	rs61934597	12	131033699	0.00532087	19.6962	C	T	-0.172495	0.0388567	8.37e-06	3684	C	T	0.0478	0.0326	0.1431	218792
genus.Gordonibacter.id.821	rs71545975	7	47148436	0.00577059	20.6277	A	G	-0.153972	0.0338918	7.04e-06	3556	A	G	-0.0258	0.0211	0.2215	218792
genus.Gordonibacter.id.821	rs7220558	17	10148653	0.00661024	24.7604	A	T	0.116884	0.0234834	6.71e-07	3723	A	T	0.0248	0.0162	0.1249	218792
genus.Gordonibacter.id.821	rs72714787	4	136768501	0.00617727	23.1285	C	A	0.181405	0.0377102	1.43e-06	3723	C	A	-0.0083	0.0235	0.725	218792
genus.Gordonibacter.id.821	rs72939513	1	83136096	0.00550832	19.0148	A	G	-0.21399	0.0490592	7.98e-06	3435	A	G	0.082	0.0362	0.0235201	218792
genus.Gordonibacter.id.821	rs7294633	12	29024534	0.00706786	26.4867	C	T	0.12867	0.0249946	3.44e-07	3723	C	T	-0.0123	0.0179	0.491501	218792
genus.Gordonibacter.id.821	rs76287110	3	187450354	0.00773851	27.1478	A	T	-0.242965	0.0466177	1.67e-07	3483	A	T	0.0757	0.0289	0.00883405	218792
genus.Gordonibacter.id.821	rs768830	7	18970607	0.00539976	20.2016	G	A	0.149852	0.0333315	7.76e-06	3723	G	A	0.0162	0.0219	0.4605	218792
genus.Haemophilus.id.3698	rs10781340	9	78752170	0.00240684	21.7983	G	A	0.0948915	0.0203221	4.32e-06	9037	G	A	0.0141	0.0242	0.560701	218792
genus.Haemophilus.id.3698	rs10840326	11	9951672	0.00224532	19.9968	C	G	-0.0677384	0.0151463	7.37e-06	8888	C	G	0.0121	0.0165	0.4654	218792
genus.Haemophilus.id.3698	rs111582866	16	48742489	0.00271839	22.8095	G	A	-0.124265	0.026016	1.27e-06	8370	G	A	-0.0143	0.0283	0.6131	218792
genus.Haemophilus.id.3698	rs12191680	6	129224488	0.00309383	28.2815	C	G	0.106544	0.0200323	1.47e-07	9115	C	G	-0.0224	0.0263	0.3946	218792
genus.Haemophilus.id.3698	rs12876183	13	85114550	0.0022015	20.0955	T	A	0.0749201	0.016711	9.62e-06	9110	T	A	-0.0196	0.0167	0.2412	218792
genus.Haemophilus.id.3698	rs35509	12	115493337	0.0026935	22.7622	G	A	0.128249	0.0268779	2.01e-06	8430	G	A	-0.0133	0.0395	0.7358	218792
genus.Haemophilus.id.3698	rs4822728	22	26891808	0.00237835	21.7351	T	C	0.0705861	0.0151388	3.48e-06	9119	T	C	0.0175	0.0159	0.2697	218792
genus.Haemophilus.id.3698	rs56310940	7	24360361	0.00210652	19.2457	G	C	-0.108393	0.0247052	7.23e-06	9119	G	C	-0.0214	0.0242	0.3752	218792
genus.Haemophilus.id.3698	rs76022354	10	94306385	0.0064317	23.4076	C	T	0.244638	0.0505504	1.83e-06	3618	C	T	-0.0019	0.0365	0.9594	218792
genus.Haemophilus.id.3698	rs78909003	9	105650242	0.00666516	23.867	T	C	-0.246256	0.0503924	1.67e-06	3559	T	C	0.0403	0.035	0.2497	218792
genus.Haemophilus.id.3698	rs9328464	6	8350917	0.00258296	23.6098	T	C	0.0723095	0.0148799	1.42e-06	9119	T	C	-0.0149	0.0159	0.3512	218792
genus.Haemophilus.id.3698	rs9382510	6	55448491	0.00320808	29.3358	C	T	-0.093521	0.0172649	7.12e-08	9117	C	T	0.0545	0.018	0.00241301	218792
genus.Haemophilus.id.3698	rs9574096	13	36104947	0.00246202	22.4992	A	T	-0.0736375	0.0155227	2.18e-06	9118	A	T	0.0052	0.0164	0.7527	218792
genus.Haemophilus.id.3698	rs9895850	17	64535013	0.00464659	21.4274	T	C	-0.192957	0.0416755	2.14e-06	4592	T	C	0.0651	0.0386	0.092151	218792
genus.Holdemanella.id.11393	rs12415649	10	125021315	0.00252573	19.396	G	C	0.0839384	0.0190567	7.88e-06	7662	G	C	0.0128	0.0191	0.504001	218792
genus.Holdemanella.id.11393	rs12513188	4	71000791	0.00277492	21.4208	G	A	0.0903906	0.0195276	4.65e-06	7700	G	A	-0.008	0.0179	0.6568	218792
genus.Holdemanella.id.11393	rs17586763	13	50932063	0.00517363	19.84	T	C	-0.227285	0.0510135	7.72e-06	3817	T	C	0.021	0.0358	0.5575	218792
genus.Holdemanella.id.11393	rs1830029	7	14728950	0.00273659	20.4545	C	G	-0.0954096	0.021093	5.35e-06	7456	C	G	0.0167	0.019	0.38	218792
genus.Holdemanella.id.11393	rs1926302	1	65153340	0.0028183	21.7622	G	A	-0.107972	0.0231421	7.5e-06	7702	G	A	-0.0019	0.0191	0.922	218792
genus.Holdemanella.id.11393	rs34187114	8	138623633	0.0027676	21.3752	C	A	-0.104505	0.022601	5.13e-06	7704	C	A	0.0052	0.0251	0.8353	218792
genus.Holdemanella.id.11393	rs35228298	3	85392882	0.00283938	21.225	G	A	0.0934832	0.0202886	7.3e-06	7456	G	A	-0.0073	0.0217	0.737199	218792
genus.Holdemanella.id.11393	rs4541991	9	105004835	0.00296195	22.7411	T	C	-0.0927334	0.0194435	2.1e-06	7657	T	C	0.0151	0.017	0.3746	218792
genus.Holdemanella.id.11393	rs607782	6	4148609	0.00327754	24.5111	T	C	-0.0854214	0.0172515	7.19e-07	7456	T	C	-0.0022	0.0165	0.8928	218792
genus.Holdemanella.id.11393	rs62113381	19	7668225	0.00281736	20.6474	T	C	-0.105447	0.0232029	5.54e-06	7310	T	C	0.0078	0.0235	0.739301	218792
genus.Holdemanella.id.11393	rs73011279	19	15020095	0.00311185	23.2681	T	C	-0.0961669	0.0199336	1.36e-06	7456	T	C	-0.0093	0.0188	0.6222	218792
genus.Holdemanella.id.11393	rs75764681	10	4494630	0.0073835	22.3227	T	C	-0.283103	0.0598999	1.94e-06	3003	T	C	0.0046	0.039	0.9063	218792
genus.Holdemanella.id.11393	rs761624	6	163603171	0.00369502	28.572	C	G	0.0959801	0.0179537	1.38e-07	7706	C	G	0.0137	0.0173	0.4289	218792
genus.Holdemanella.id.11393	rs8113760	19	43851935	0.00277606	20.7504	G	A	0.078999	0.01734	4.62e-06	7456	G	A	0.0121	0.0172	0.4804	218792
genus.Holdemania.id.2157	rs10885477	10	115332413	0.00230047	20.0325	T	C	-0.135137	0.0301894	8.6e-06	8690	T	C	0.0281	0.0364	0.4401	218792
genus.Holdemania.id.2157	rs11080063	17	26789271	0.00216068	19.7069	G	A	-0.0665238	0.0149837	6.67e-06	9103	G	A	-0.033	0.0161	0.0406799	218792
genus.Holdemania.id.2157	rs111745969	15	93110222	0.00249779	20.6108	A	G	0.120677	0.0265781	3.71e-06	8233	A	G	0.0219	0.0233	0.3474	218792
genus.Holdemania.id.2157	rs113593397	8	123973840	0.00250417	20.8218	A	G	-0.128935	0.0282526	9.36e-06	8296	A	G	0.0004	0.027	0.9877	218792
genus.Holdemania.id.2157	rs116500994	13	81685543	0.00260006	21.9757	G	T	-0.13755	0.0293386	2.34e-06	8432	G	T	-0.0532	0.0374	0.1549	218792
genus.Holdemania.id.2157	rs12701617	7	38292857	0.00214183	19.541	A	G	-0.0660617	0.0149427	9.52e-06	9106	A	G	0.0356	0.0158	0.0239502	218792
genus.Holdemania.id.2157	rs150096134	12	39589195	0.00343988	23.8309	T	A	0.162139	0.0332089	2.38e-06	6906	T	A	0.0761	0.0265	0.00413704	218792
genus.Holdemania.id.2157	rs1867876	11	18768068	0.00295636	27.0034	T	C	0.0842919	0.0162192	2.74e-07	9109	T	C	0.0019	0.0173	0.9121	218792
genus.Holdemania.id.2157	rs41438744	14	102553414	0.0024117	21.3637	C	G	-0.12487	0.027013	2.44e-06	8839	C	G	-0.0076	0.0291	0.7939	218792
genus.Holdemania.id.2157	rs4146507	5	106209093	0.00220934	20.1628	C	T	0.079488	0.0177002	7.23e-06	9108	C	T	0.0175	0.0185	0.3446	218792
genus.Holdemania.id.2157	rs55888180	17	76443497	0.00243996	20.6974	C	G	0.128671	0.0282795	5.89e-06	8464	C	G	0.003	0.0353	0.9323	218792
genus.Holdemania.id.2157	rs73139538	7	63323145	0.00253711	20.5851	G	A	-0.148594	0.0327469	7.77e-06	8095	G	A	0.001	0.0468	0.9837	218792
genus.Holdemania.id.2157	rs77293403	5	77388406	0.00304698	23.1758	A	G	0.164556	0.0341775	1.77e-06	7585	A	G	-0.0497	0.0429	0.2462	218792
genus.Holdemania.id.2157	rs80149660	10	129908282	0.00609673	20.1261	C	T	-0.232987	0.0519183	6.04e-06	3283	C	T	0.0681	0.0389	0.0794694	218792
genus.Holdemania.id.2157	rs9500080	6	105737322	0.00293886	26.8343	C	T	0.0926764	0.0178886	4.09e-07	9106	C	T	-0.0035	0.0211	0.8693	218792
genus.Holdemania.id.2157	rs9529719	13	70856516	0.00233131	21.2762	T	C	0.074038	0.0160494	5.97e-06	9107	T	C	0.0219	0.0169	0.1963	218792
genus.Holdemania.id.2157	rs967319	3	60615680	0.0021812	19.9054	T	C	0.0788638	0.0176744	8.38e-06	9108	T	C	0.0384	0.0186	0.0385203	218792
genus.Howardella.id.2000	rs10048062	15	98476920	0.00501988	19.1617	C	T	-0.147352	0.0336531	8.59e-06	3800	C	T	-0.0192	0.0282	0.4968	218792
genus.Howardella.id.2000	rs12452946	17	17253288	0.00559213	21.3584	A	G	-0.105833	0.0228941	3.8e-06	3800	A	G	-0.0121	0.0159	0.4449	218792
genus.Howardella.id.2000	rs1484873	18	43206985	0.00665642	24.1639	A	G	-0.227831	0.046335	2.56e-06	3608	A	G	-0.0096	0.0223	0.6669	218792
genus.Howardella.id.2000	rs17167098	7	133154356	0.00641201	23.1289	G	A	-0.169366	0.0352068	1.12e-06	3586	G	A	-0.0032	0.0231	0.8902	218792
genus.Howardella.id.2000	rs2154047	14	95452797	0.00576564	20.9985	C	A	-0.192557	0.0420093	9.97e-06	3623	C	A	0.0559	0.0279	0.0448095	218792
genus.Howardella.id.2000	rs36081916	7	93527414	0.00624939	20.2119	T	C	-0.18123	0.0402987	4.7e-06	3216	T	C	0.0267	0.0284	0.3481	218792
genus.Howardella.id.2000	rs3791893	2	218819396	0.00489727	18.6668	A	G	0.147035	0.034023	9.5e-06	3795	A	G	0.0175	0.0228	0.4418	218792
genus.Howardella.id.2000	rs609430	4	169178315	0.00573782	21.9065	T	G	-0.112045	0.0239328	3.34e-06	3798	T	G	0.0173	0.0166	0.2978	218792
genus.Howardella.id.2000	rs61771805	1	72972799	0.00584498	21.2244	A	T	-0.136779	0.0296811	4.03e-06	3612	A	T	-0.0123	0.0249	0.6205	218792
genus.Howardella.id.2000	rs672217	18	60125134	0.00605447	21.9837	G	A	0.164146	0.0349993	3.52e-06	3611	G	A	0.0159	0.0199	0.4228	218792
genus.Hungatella.id.11306	rs10044993	5	58424440	0.00459025	19.4002	C	A	0.139547	0.0316748	8.07e-06	4209	C	A	-0.0151	0.0285	0.5962	218792
genus.Hungatella.id.11306	rs13128780	4	166058998	0.00569753	22.9035	T	C	-0.149725	0.0312777	1.75e-06	3999	T	C	0.0013	0.0203	0.9502	218792
genus.Hungatella.id.11306	rs13249325	8	14853525	0.00463693	19.5984	T	G	-0.100023	0.0225883	9.69e-06	4209	T	G	0.0167	0.0159	0.2954	218792
genus.Hungatella.id.11306	rs17092615	14	95973619	0.00503854	20.2917	G	A	0.152235	0.0337867	7.38e-06	4009	G	A	-0.0124	0.023	0.5883	218792
genus.Hungatella.id.11306	rs72759041	15	89577376	0.00507322	19.9272	G	T	-0.126025	0.0282242	3.86e-06	3910	G	T	-0.0139	0.0197	0.4797	218792
genus.Intestinibacter.id.11345	rs10805326	4	14324623	0.00249748	30.7984	G	A	0.0775151	0.0139665	3.55e-08	12303	G	A	0.0051	0.0175	0.7706	218792
genus.Intestinibacter.id.11345	rs10805326	4	14324623	0.00249748	30.7984	G	A	0.0775151	0.0139665	3.55e-08	12303	A	C	-0.0678	0.1523	0.6562	218792
genus.Intestinibacter.id.11345	rs11109097	12	97928437	0.0017054	20.3016	C	T	0.0624272	0.0138539	5.49e-06	11886	C	T	0.0129	0.016	0.4192	218792
genus.Intestinibacter.id.11345	rs118030283	16	5993076	0.00247355	21.8907	G	A	-0.151829	0.0324471	2.67e-06	8830	G	A	-0.0133	0.0382	0.727301	218792
genus.Intestinibacter.id.11345	rs16938435	9	21502923	0.00184217	22.7023	T	C	-0.112189	0.0235439	1.8e-06	12303	T	C	0.0579	0.0268	0.03046	218792
genus.Intestinibacter.id.11345	rs2098844	11	127703160	0.00163023	20.0667	C	T	-0.0575295	0.0128416	6.79e-06	12291	C	T	-0.019	0.0165	0.2476	218792
genus.Intestinibacter.id.11345	rs2702387	4	179361262	0.00172252	21.2046	A	G	0.0608559	0.0132145	4.26e-06	12291	A	G	-0.0055	0.0161	0.734999	218792
genus.Intestinibacter.id.11345	rs4327025	15	92446683	0.002234	27.5419	G	A	-0.0810346	0.0154397	1.64e-07	12303	G	A	-0.0299	0.0204	0.1417	218792
genus.Intestinibacter.id.11345	rs447950	5	148846426	0.00171554	21.1391	A	G	0.0628342	0.0136652	5.64e-06	12303	A	G	-0.0061	0.0164	0.7114	218792
genus.Intestinibacter.id.11345	rs478972	11	125663184	0.00222682	23.0566	T	C	-0.142681	0.0297116	1.82e-06	10333	T	C	0.0187	0.0275	0.495801	218792
genus.Intestinibacter.id.11345	rs6062862	20	61325223	0.00167136	20.4029	A	G	0.0924508	0.0204658	6.68e-06	12189	A	G	0.021	0.0288	0.4653	218792
genus.Intestinibacter.id.11345	rs62430350	6	170918194	0.00240992	18.4756	T	C	0.151096	0.0351476	6.84e-06	7650	T	C	0.0061	0.0423	0.8851	218792
genus.Intestinibacter.id.11345	rs68093214	3	70657785	0.00163996	19.5213	C	T	0.0662258	0.0149877	9.26e-06	11886	C	T	0.0003	0.0185	0.9886	218792
genus.Intestinibacter.id.11345	rs6875660	5	159686256	0.00171255	21.0851	C	T	0.0890455	0.0193905	3.06e-06	12293	C	T	0.0364	0.0331	0.2719	218792
genus.Intestinibacter.id.11345	rs893394	2	20054971	0.00167227	19.9066	G	A	0.0583322	0.0130729	7.85e-06	11886	G	A	0.0262	0.0161	0.1033	218792
genus.Intestinibacter.id.11345	rs9348442	6	10303945	0.00162194	19.9839	C	T	0.099082	0.0221625	6.26e-06	12303	C	T	0.0287	0.024	0.2313	218792
genus.Intestinimonas.id.2062	rs1000888	13	23343542	0.00161749	19.5838	C	G	-0.0585038	0.013219	9.71e-06	12090	C	G	0.0016	0.0168	0.9241	218792
genus.Intestinimonas.id.2062	rs10262702	7	66890843	0.00188234	22.1857	T	C	0.0918017	0.0194885	2.06e-06	11766	T	C	-0.0337	0.0242	0.1634	218792
genus.Intestinimonas.id.2062	rs11258178	10	13124513	0.00205793	24.2595	A	G	0.0660742	0.0134139	6.98e-07	11766	A	G	-0.0166	0.0159	0.2979	218792
genus.Intestinimonas.id.2062	rs12226153	11	94364293	0.0026804	24.2449	A	G	-0.151142	0.0306922	5.12e-07	9023	A	G	-0.0739	0.0666	0.2674	218792
genus.Intestinimonas.id.2062	rs12566247	1	43767569	0.00183115	22.1498	T	A	0.0637084	0.0135355	2.19e-06	12076	T	A	-0.0078	0.0161	0.6294	218792
genus.Intestinimonas.id.2062	rs17067892	8	3763540	0.00158988	18.3797	C	T	0.107194	0.0250013	6.38e-06	11544	C	T	0.0573	0.028	0.0409902	218792
genus.Intestinimonas.id.2062	rs1859797	7	22007303	0.00178004	20.9777	G	A	0.060368	0.0131793	4.12e-06	11766	G	A	0.0152	0.016	0.3425	218792
genus.Intestinimonas.id.2062	rs2276760	3	150620956	0.00166744	20.1746	A	G	-0.0685233	0.0152546	7.84e-06	12081	A	G	0.0059	0.0186	0.749799	218792
genus.Intestinimonas.id.2062	rs2731794	5	17209391	0.00197657	21.9379	C	T	0.120632	0.0257529	1.92e-06	11079	C	T	-0.0283	0.0438	0.5188	218792
genus.Intestinimonas.id.2062	rs2930225	16	85327902	0.00189181	22.7466	G	T	0.0729524	0.0152948	1.35e-06	12003	G	T	0.0131	0.0189	0.4864	218792
genus.Intestinimonas.id.2062	rs4113676	20	6218922	0.00623011	19.8607	A	C	-0.218507	0.0490152	7.42e-06	3170	A	C	0.0772	0.0667	0.2477	218792
genus.Intestinimonas.id.2062	rs4784055	16	58818770	0.00641998	20.6185	T	C	-0.175324	0.038599	8.72e-07	3193	T	C	-0.0224	0.0364	0.5374	218792
genus.Intestinimonas.id.2062	rs62240188	3	10611142	0.00230655	23.6968	G	A	0.130074	0.0267179	2.2e-06	10252	G	A	-0.0551	0.0274	0.0444498	218792
genus.Intestinimonas.id.2062	rs6934519	6	67200802	0.00173261	20.9784	C	T	0.0692373	0.0151154	8.57e-06	12089	C	T	-0.0254	0.0182	0.1623	218792
genus.Intestinimonas.id.2062	rs716604	2	6514088	0.00200496	24.2846	A	G	0.0818068	0.0165992	8.57e-07	12090	A	G	-0.0046	0.0188	0.8068	218792
genus.Intestinimonas.id.2062	rs7170984	15	93819735	0.00180464	21.8539	T	C	-0.0658116	0.0140767	2.98e-06	12090	T	C	-0.01	0.0177	0.5719	218792
genus.Intestinimonas.id.2062	rs72982915	2	140898088	0.00368555	20.6748	C	T	0.183158	0.0402743	4.91e-06	5591	C	T	-0.0371	0.0345	0.2822	218792
genus.Intestinimonas.id.2062	rs9823439	3	17187502	0.00166289	19.5948	T	C	-0.0581947	0.0131455	9.86e-06	11766	T	C	0.011	0.0159	0.491801	218792
genus.Intestinimonas.id.2062	rs994794	4	114608814	0.00218815	20.2804	G	C	-0.141905	0.0315074	7.31e-06	9250	G	C	-0.0281	0.0454	0.5361	218792
genus.Lachnoclostridium.id.11308	rs1031599	3	66725825	0.00115047	20.0367	G	T	-0.078627	0.0175644	6.31e-06	17398	G	T	0.0508	0.0325	0.1179	218792
genus.Lachnoclostridium.id.11308	rs12566975	1	185091351	0.00109137	19.5776	T	C	-0.0468097	0.0105787	9.57e-06	17921	T	C	0.0189	0.0159	0.235	218792
genus.Lachnoclostridium.id.11308	rs1528479	2	167244051	0.00113068	19.781	G	A	-0.0497798	0.0111919	9.64e-06	17477	G	A	-0.025	0.0164	0.128	218792
genus.Lachnoclostridium.id.11308	rs1997204	12	102046595	0.00140844	19.9378	T	C	-0.108075	0.0242022	5.97e-06	14138	T	C	-0.0112	0.0382	0.7703	218792
genus.Lachnoclostridium.id.11308	rs2385421	18	19743455	0.000951206	17.0438	A	G	0.0746186	0.0180734	7.14e-06	17903	A	G	0.0301	0.0247	0.2235	218792
genus.Lachnoclostridium.id.11308	rs3821998	4	38694566	0.00112284	20.1417	C	A	-0.0864066	0.0192519	6.72e-06	17920	C	A	0.0302	0.0258	0.242	218792
genus.Lachnoclostridium.id.11308	rs4738679	8	59370320	0.00116003	20.8106	G	A	-0.0520267	0.011404	4.42e-06	17921	G	A	0.0224	0.0163	0.1691	218792
genus.Lachnoclostridium.id.11308	rs6112314	20	19300846	0.00150899	26.961	A	C	-0.0561715	0.0108174	2.43e-07	17842	A	C	0.0153	0.0168	0.3616	218792
genus.Lachnoclostridium.id.11308	rs615997	3	23037786	0.00128771	23.0913	T	C	0.0511752	0.0106491	2.03e-06	17911	T	C	-0.019	0.0158	0.2282	218792
genus.Lachnoclostridium.id.11308	rs61915992	12	28169306	0.00129746	21.7879	A	T	0.0803876	0.0172209	2.67e-06	16773	A	T	-0.0121	0.0226	0.5924	218792
genus.Lachnoclostridium.id.11308	rs62028349	16	27217620	0.00109633	19.6677	G	C	0.0469989	0.0105971	9.17e-06	17922	G	C	0.0109	0.0159	0.494399	218792
genus.Lachnoclostridium.id.11308	rs62285313	3	177470032	0.00133158	22.6524	A	G	0.0864203	0.0181565	1.58e-06	16991	A	G	0.0064	0.0267	0.8095	218792
genus.Lachnoclostridium.id.11308	rs72829893	17	46694541	0.00154538	19.1954	G	T	0.117472	0.0268103	5.58e-06	12404	G	T	0.0059	0.0261	0.82	218792
genus.Lachnoclostridium.id.11308	rs78068103	17	13816159	0.0011895	20.8113	A	G	0.0886199	0.0194248	3.67e-06	17477	A	G	-0.0346	0.0248	0.1637	218792
genus.Lachnoclostridium.id.11308	rs789029	18	1053252	0.00120393	21.6005	C	T	-0.0641289	0.0137974	3.75e-06	17922	C	T	0.0015	0.0227	0.9486	218792
genus.Lachnospira.id.2004	rs13157098	5	176802250	0.00153121	24.4525	A	G	-0.0768058	0.0155312	5.99e-07	15947	A	G	0.0419	0.0215	0.0517702	218792
genus.Lachnospira.id.2004	rs159484	4	111995627	0.00122112	20.1548	G	A	0.0794668	0.0176999	6.68e-06	16487	G	A	0.0053	0.0304	0.8615	218792
genus.Lachnospira.id.2004	rs2326833	6	6893668	0.00134473	21.0464	C	G	-0.078495	0.017109	4.6e-06	15632	C	G	-0.0243	0.0217	0.2637	218792
genus.Lachnospira.id.2004	rs2520509	12	91006514	0.00121664	20.0966	A	G	0.0519063	0.011578	7.42e-06	16500	A	G	0.0007	0.0174	0.9697	218792
genus.Lachnospira.id.2004	rs4686798	3	186445436	0.00132335	21.8576	T	C	0.0531826	0.0113747	2.74e-06	16497	T	C	0.0368	0.0165	0.0253799	218792
genus.Lachnospira.id.2004	rs4923324	11	25962890	0.00129722	21.4163	G	A	-0.0617321	0.0133387	2.44e-06	16490	G	A	0.0686	0.0215	0.001414	218792
genus.Lachnospira.id.2004	rs56791201	2	57701660	0.00132765	21.9141	T	C	0.051823	0.0110697	2.93e-06	16486	T	C	-0.004	0.0165	0.8108	218792
genus.LachnospiraceaeFCS020group.id.11314	rs10093861	8	121244406	0.00159835	22.0445	G	A	-0.0568869	0.0121152	3.06e-06	13772	G	A	-0.0145	0.0161	0.37	218792
genus.LachnospiraceaeFCS020group.id.11314	rs113859143	5	109403564	0.00152684	20.2401	G	C	-0.108906	0.0242055	2.55e-06	13238	G	C	-0.055	0.0345	0.1107	218792
genus.LachnospiraceaeFCS020group.id.11314	rs12078956	1	35328576	0.00172642	22.6535	C	G	0.106101	0.0222904	2.15e-06	13101	C	G	0.0394	0.0256	0.1243	218792
genus.LachnospiraceaeFCS020group.id.11314	rs1254846	10	44346094	0.00157441	20.7677	G	A	0.105963	0.0232501	5.6e-06	13172	G	A	0.0052	0.0235	0.8262	218792
genus.LachnospiraceaeFCS020group.id.11314	rs1363769	19	17865305	0.00557577	19.9218	T	C	-0.200628	0.0449372	1.58e-06	3555	T	C	-0.0006	0.0448	0.9885	218792
genus.LachnospiraceaeFCS020group.id.11314	rs2322265	4	166588085	0.00160572	22.1463	C	T	-0.0666305	0.0141577	5.21e-06	13772	C	T	-0.0161	0.0181	0.375	218792
genus.LachnospiraceaeFCS020group.id.11314	rs2862811	3	165996415	0.00156125	21.532	T	C	0.0564927	0.0121736	3.92e-06	13772	T	C	0.0323	0.0173	0.0617803	218792
genus.LachnospiraceaeFCS020group.id.11314	rs35035870	11	3248876	0.00373604	21.1503	T	C	-0.190615	0.0414403	2.62e-06	5642	T	C	-0.08	0.0411	0.0513499	218792
genus.LachnospiraceaeFCS020group.id.11314	rs369444	16	23631307	0.00187942	23.4673	C	G	0.125481	0.0259008	3.15e-06	12465	C	G	-0.0101	0.0305	0.7417	218792
genus.LachnospiraceaeFCS020group.id.11314	rs3999074	10	65563647	0.00148041	20.4155	G	T	-0.0550587	0.0121847	6.55e-06	13772	G	T	0.0025	0.0159	0.8763	218792
genus.LachnospiraceaeFCS020group.id.11314	rs4452603	6	71966268	0.00146208	19.745	T	G	0.0604208	0.0135965	8.98e-06	13487	T	G	0.0027	0.018	0.882	218792
genus.LachnospiraceaeFCS020group.id.11314	rs7249113	19	2571232	0.00191058	25.9034	G	A	0.0679483	0.0133496	3.72e-07	13534	G	A	0.0102	0.0174	0.5567	218792
genus.LachnospiraceaeFCS020group.id.11314	rs72793667	2	53946431	0.00180913	22.463	A	G	-0.116881	0.0246589	1.63e-06	12396	A	G	0.095	0.0404	0.01869	218792
genus.LachnospiraceaeFCS020group.id.11314	rs9308097	4	165786478	0.00147891	20.0541	A	G	0.055381	0.0123659	7.47e-06	13542	A	G	0.0115	0.0158	0.4695	218792
genus.LachnospiraceaeFCS020group.id.11314	rs9788306	13	40419314	0.00167265	23.071	C	T	-0.062804	0.0130744	1.39e-06	13772	C	T	0.0202	0.0176	0.2512	218792
genus.LachnospiraceaeFCS020group.id.11314	rs9919338	1	118425334	0.00152616	21.0413	G	C	-0.0553339	0.0120621	4.91e-06	13768	G	C	0.0185	0.0159	0.2463	218792
genus.LachnospiraceaeNC2004group.id.11316	rs117467633	17	21157406	0.00384803	19.6042	T	C	-0.169687	0.0383169	9.13e-06	5077	T	C	0.0385	0.0408	0.3463	218792
genus.LachnospiraceaeNC2004group.id.11316	rs12127733	1	234157721	0.00350863	21.9146	G	A	0.115182	0.0246006	3.11e-06	6226	G	A	0.0123	0.0206	0.5495	218792
genus.LachnospiraceaeNC2004group.id.11316	rs12208226	6	22725908	0.00366405	20.6603	C	A	-0.154739	0.0340372	9.75e-06	5620	C	A	0.0043	0.0259	0.8673	218792
genus.LachnospiraceaeNC2004group.id.11316	rs12863463	13	47512191	0.00370229	20.4903	G	A	-0.156365	0.0345372	6.04e-06	5516	G	A	-0.0444	0.0296	0.1332	218792
genus.LachnospiraceaeNC2004group.id.11316	rs1331592	9	122239986	0.0032659	20.7278	C	G	0.0948806	0.0208369	5.34e-06	6328	C	G	0.0308	0.0187	0.0983898	218792
genus.LachnospiraceaeNC2004group.id.11316	rs17067076	18	58229086	0.00431412	19.268	G	A	-0.154631	0.0352194	5.61e-06	4449	G	A	0.0196	0.0248	0.4307	218792
genus.LachnospiraceaeNC2004group.id.11316	rs1928659	9	29334137	0.00370231	20.4904	T	C	0.102522	0.0226445	6.17e-06	5516	T	C	0.0269	0.0198	0.1744	218792
genus.LachnospiraceaeNC2004group.id.11316	rs1929743	13	76829562	0.00304771	19.3449	T	C	0.0837206	0.0190318	9.06e-06	6330	T	C	-0.0107	0.0168	0.5211	218792
genus.LachnospiraceaeNC2004group.id.11316	rs3756315	5	149544722	0.00346308	21.9836	A	G	-0.0883469	0.0188397	3.33e-06	6328	A	G	0.0147	0.0174	0.396	218792
genus.LachnospiraceaeNC2004group.id.11316	rs6116753	20	5330700	0.00359064	22.616	G	A	0.0994748	0.0209139	2.92e-06	6278	G	A	-0.0082	0.0206	0.692299	218792
genus.LachnospiraceaeND3007group.id.11317	rs2861203	3	172950553	0.00131927	20.2155	G	A	0.0572304	0.0127279	7.37e-06	15305	G	A	-0.0261	0.0174	0.1338	218792
genus.LachnospiraceaeND3007group.id.11317	rs72776675	10	14137663	0.00124813	19.1203	T	C	-0.0647067	0.014797	8.72e-06	15302	T	C	-0.0008	0.0211	0.9695	218792
genus.LachnospiraceaeND3007group.id.11317	rs9932954	16	1100633	0.0015393	23.4643	A	G	-0.0561864	0.0115984	1.25e-06	15222	A	G	-0.0006	0.0168	0.9707	218792
genus.LachnospiraceaeNK4A136group.id.11319	rs10952110	7	8497922	0.00117949	19.794	G	T	0.0487709	0.0109614	9.08e-06	16764	G	T	-0.0007	0.016	0.9672	218792
genus.LachnospiraceaeNK4A136group.id.11319	rs11263806	17	35240097	0.00116994	20.1864	A	G	-0.0524615	0.0116758	5.07e-06	17236	A	G	-0.019	0.0168	0.2567	218792
genus.LachnospiraceaeNK4A136group.id.11319	rs12362320	11	3922055	0.0014677	24.6378	G	C	0.0573168	0.0115466	8.04e-07	16764	G	C	0.0336	0.0161	0.0369097	218792
genus.LachnospiraceaeNK4A136group.id.11319	rs12611395	19	21806125	0.00123801	20.4326	A	G	-0.0902532	0.0199652	5.83e-06	16486	A	G	0.0585	0.0259	0.0241702	218792
genus.LachnospiraceaeNK4A136group.id.11319	rs160061	5	6116659	0.00130943	22.5936	A	G	0.0513831	0.0108094	2.12e-06	17234	A	G	-0.0001	0.0159	0.9957	218792
genus.LachnospiraceaeNK4A136group.id.11319	rs28540839	8	84735080	0.00125849	21.1214	A	C	0.0508285	0.0110591	9.34e-06	16764	A	C	-0.0303	0.0159	0.0571294	218792
genus.LachnospiraceaeNK4A136group.id.11319	rs2880566	17	30016653	0.0011486	19.8132	T	C	0.0599578	0.0134693	5.61e-06	17232	T	C	-0.0194	0.0224	0.3853	218792
genus.LachnospiraceaeNK4A136group.id.11319	rs4955932	3	55181375	0.00117367	20.2508	T	C	-0.0492283	0.0109388	7.05e-06	17236	T	C	0.026	0.0164	0.1129	218792
genus.LachnospiraceaeNK4A136group.id.11319	rs59805249	5	90289997	0.00133159	20.2578	T	C	0.0936162	0.0207982	9.45e-06	15195	T	C	0.0271	0.0273	0.3211	218792
genus.LachnospiraceaeNK4A136group.id.11319	rs68104925	14	100177681	0.00131289	22.6443	T	C	-0.0549104	0.0115385	2.37e-06	17227	T	C	-0.0051	0.0172	0.765399	218792
genus.LachnospiraceaeNK4A136group.id.11319	rs7073658	10	62175024	0.00120217	20.7432	T	G	-0.0499621	0.0109693	5.27e-06	17236	T	G	0.021	0.0159	0.1877	218792
genus.LachnospiraceaeNK4A136group.id.11319	rs73044693	19	51256120	0.00171162	21.8965	A	G	-0.10758	0.0229884	3.57e-06	12773	A	G	0.0071	0.0314	0.8202	218792
genus.LachnospiraceaeNK4A136group.id.11319	rs7616165	3	190415145	0.00552354	22.7279	G	T	-0.230542	0.0483465	2.77e-06	4094	G	T	0.0643	0.0505	0.2027	218792
genus.LachnospiraceaeNK4A136group.id.11319	rs76193507	3	161749981	0.00587068	21.1175	A	G	-0.22973	0.0499776	2.93e-06	3578	A	G	0.0208	0.0283	0.4619	218792
genus.LachnospiraceaeNK4A136group.id.11319	rs7832116	8	4842929	0.00128754	22.1961	A	G	-0.0714756	0.0151703	3.57e-06	17219	A	G	0.0043	0.0237	0.8564	218792
genus.LachnospiraceaeNK4A136group.id.11319	rs954878	1	54578401	0.00132072	22.7795	A	G	-0.0520656	0.0109082	1.78e-06	17227	A	G	-0.0183	0.0165	0.2658	218792
genus.LachnospiraceaeUCG001.id.11321	rs10815577	9	7273249	0.00222583	22.6359	C	G	-0.0683706	0.0143691	1.72e-06	10149	C	G	-0.0296	0.0161	0.0655602	218792
genus.LachnospiraceaeUCG001.id.11321	rs12131224	1	166199362	0.00210637	20.42	C	T	0.117095	0.02591	7.4e-06	9676	C	T	0.0116	0.0256	0.651199	218792
genus.LachnospiraceaeUCG001.id.11321	rs2050911	1	82384407	0.00234287	23.8266	G	A	0.0751466	0.0153934	1.11e-06	10148	G	A	0.0026	0.0168	0.8782	218792
genus.LachnospiraceaeUCG001.id.11321	rs2371284	12	56256262	0.0020094	20.0519	T	C	-0.0761893	0.0170127	7.56e-06	9961	T	C	0.0138	0.019	0.4666	218792
genus.LachnospiraceaeUCG001.id.11321	rs437876	3	42568440	0.00288584	29.3703	T	C	0.0784637	0.0144768	7.17e-08	10150	T	C	-0.018	0.0167	0.2804	218792
genus.LachnospiraceaeUCG001.id.11321	rs4981345	14	21455973	0.0020755	20.7129	T	C	-0.0681973	0.0149831	6.09e-06	9961	T	C	-0.0196	0.0169	0.2472	218792
genus.LachnospiraceaeUCG001.id.11321	rs573933	9	14477851	0.00212017	21.5612	T	C	-0.107898	0.0232346	3.11e-06	10150	T	C	0.0397	0.0259	0.1246	218792
genus.LachnospiraceaeUCG001.id.11321	rs62496417	7	96965504	0.00200681	20.4061	T	G	-0.0748504	0.0165681	5.88e-06	10150	T	G	-0.0043	0.0192	0.8223	218792
genus.LachnospiraceaeUCG001.id.11321	rs7213933	17	36155074	0.00197612	19.7191	T	A	-0.0816269	0.01838	9.02e-06	9961	T	A	0.0012	0.0218	0.9555	218792
genus.LachnospiraceaeUCG001.id.11321	rs7341608	8	56839500	0.00196389	19.5103	T	C	-0.0784757	0.0177648	9.48e-06	9917	T	C	0.039	0.0233	0.0936009	218792
genus.LachnospiraceaeUCG001.id.11321	rs74034332	16	79092359	0.00320218	19.2813	G	A	0.168045	0.0382637	3.33e-06	6004	G	A	0.0055	0.033	0.8678	218792
genus.LachnospiraceaeUCG001.id.11321	rs78848836	1	53773248	0.00219814	20.9371	A	G	-0.118868	0.0259753	3.38e-06	9506	A	G	-0.0425	0.026	0.1023	218792
genus.LachnospiraceaeUCG001.id.11321	rs79476906	1	108102470	0.00196658	19.5371	T	A	-0.087088	0.0197008	8.27e-06	9917	T	A	0.0435	0.0221	0.0492901	218792
genus.LachnospiraceaeUCG001.id.11321	rs8104225	19	13963848	0.00205158	20.3647	A	G	0.0892098	0.0197665	8.04e-06	9908	A	G	0.0253	0.0191	0.1847	218792
genus.LachnospiraceaeUCG001.id.11321	rs9403580	6	145006780	0.00217558	22.006	C	T	0.107801	0.0229777	3.47e-06	10095	C	T	0.0187	0.0236	0.4291	218792
genus.LachnospiraceaeUCG001.id.11321	rs985416	3	148269083	0.0028637	28.4752	C	T	0.0970258	0.0181807	1.46e-07	9917	C	T	-0.0052	0.0206	0.8018	218792
genus.LachnospiraceaeUCG004.id.11324	rs11128180	3	70592215	0.00147743	21.4011	A	G	0.0648288	0.0140126	4.52e-06	14466	A	G	-0.0355	0.0187	0.0576806	218792
genus.LachnospiraceaeUCG004.id.11324	rs12072562	1	105287469	0.0020908	19.2212	T	C	0.133104	0.0303566	7.07e-06	9176	T	C	0.021	0.0409	0.6081	218792
genus.LachnospiraceaeUCG004.id.11324	rs12673420	7	71303007	0.00151402	21.9274	G	A	0.0554351	0.0118375	2.98e-06	14463	G	A	0.0051	0.0158	0.747699	218792
genus.LachnospiraceaeUCG004.id.11324	rs12747809	1	240359089	0.00169025	24.4858	G	A	-0.062197	0.0125685	8.65e-07	14464	G	A	-0.0065	0.0176	0.7116	218792
genus.LachnospiraceaeUCG004.id.11324	rs12894272	14	40536481	0.0014799	21.4326	A	G	0.0579792	0.0125229	4.34e-06	14463	A	G	-0.002	0.0167	0.905	218792
genus.LachnospiraceaeUCG004.id.11324	rs233486	6	14817584	0.00147344	20.2277	A	G	-0.0799088	0.017766	6.28e-06	13710	A	G	0.0062	0.0228	0.786799	218792
genus.LachnospiraceaeUCG004.id.11324	rs2444793	6	81318836	0.00145432	21.0615	C	T	-0.0542433	0.0118188	4.77e-06	14463	C	T	0.0167	0.0162	0.3023	218792
genus.LachnospiraceaeUCG004.id.11324	rs2706242	13	51292902	0.00145031	20.3687	G	C	-0.0901399	0.0199712	9.84e-06	14026	G	C	0.0102	0.0284	0.718199	218792
genus.LachnospiraceaeUCG004.id.11324	rs2726805	4	183247601	0.00142158	20.591	A	G	0.0548397	0.0120844	6.3e-06	14466	A	G	0.0001	0.0161	0.9949	218792
genus.LachnospiraceaeUCG004.id.11324	rs2882478	2	49904589	0.00164125	23.7781	G	A	-0.0577091	0.0118338	1.21e-06	14466	G	A	-0.0275	0.0159	0.0839305	218792
genus.LachnospiraceaeUCG004.id.11324	rs35182105	12	24572337	0.00155582	20.519	A	G	-0.109724	0.024221	4.87e-06	13170	A	G	0.0129	0.0352	0.714	218792
genus.LachnospiraceaeUCG004.id.11324	rs6656451	1	65990422	0.00142992	20.7005	C	T	-0.05436	0.011947	5.57e-06	14458	C	T	-0.0071	0.0158	0.6531	218792
genus.LachnospiraceaeUCG004.id.11324	rs7629954	3	154242406	0.00164566	20.7134	A	G	0.108441	0.023825	5.77e-06	12568	A	G	0.0255	0.0382	0.505	218792
genus.LachnospiraceaeUCG008.id.11328	rs10741777	11	19572557	0.00355081	24.987	T	C	-0.0973842	0.0194791	7.69e-07	7014	T	C	-0.0041	0.0172	0.8093	218792
genus.LachnospiraceaeUCG008.id.11328	rs10793103	11	74391775	0.00410183	28.8805	C	T	0.0974344	0.0181279	9.35e-08	7014	C	T	0.0086	0.0159	0.589899	218792
genus.LachnospiraceaeUCG008.id.11328	rs10801803	1	90818872	0.00329222	23.1712	G	A	-0.117029	0.0243085	1.4e-06	7017	G	A	0.0302	0.0226	0.1823	218792
genus.LachnospiraceaeUCG008.id.11328	rs13024781	2	168628871	0.00317973	22.3738	T	C	-0.0798769	0.0168846	2.29e-06	7016	T	C	-0.0029	0.0159	0.8558	218792
genus.LachnospiraceaeUCG008.id.11328	rs57091572	6	81214803	0.0031465	21.9309	A	G	-0.110443	0.0235801	2.86e-06	6950	A	G	-0.0112	0.0234	0.631401	218792
genus.LachnospiraceaeUCG008.id.11328	rs57254474	8	23076159	0.00281896	19.8309	G	A	0.0886511	0.0199045	6.92e-06	7017	G	A	0.0092	0.0189	0.6265	218792
genus.LachnospiraceaeUCG008.id.11328	rs61944774	12	129539818	0.00346385	20.8484	A	G	0.179838	0.0393797	6.34e-06	6000	A	G	-0.0056	0.036	0.8769	218792
genus.LachnospiraceaeUCG008.id.11328	rs62277846	2	228100140	0.00329751	23.2052	C	T	0.102292	0.0212319	1.59e-06	7016	C	T	0.0278	0.0201	0.1674	218792
genus.LachnospiraceaeUCG008.id.11328	rs67078837	4	114220647	0.00348777	24.5489	T	C	-0.0845848	0.0170693	7.68e-07	7016	T	C	-0.0029	0.0161	0.8561	218792
genus.LachnospiraceaeUCG008.id.11328	rs75356640	15	31697284	0.00314814	20.2781	G	A	0.136523	0.0303128	9.83e-06	6423	G	A	-0.036	0.0243	0.139	218792
genus.LachnospiraceaeUCG008.id.11328	rs955844	16	84992314	0.00349641	24.0731	A	C	0.112064	0.0228369	1.81e-06	6863	A	C	-0.008	0.0229	0.726999	218792
genus.LachnospiraceaeUCG008.id.11328	rs9873555	3	100496680	0.00407827	26.9245	G	C	-0.121162	0.0233467	2.41e-07	6577	G	C	-0.0079	0.0248	0.751201	218792
genus.LachnospiraceaeUCG010.id.11330	rs10414815	19	42586245	0.00177905	20.606	T	C	0.10453	0.0230253	4.24e-06	11564	T	C	0.0126	0.0379	0.738999	218792
genus.LachnospiraceaeUCG010.id.11330	rs11192447	10	83848397	0.00212538	27.0349	A	G	0.126592	0.024345	4.69e-07	12695	A	G	-0.0688	0.0366	0.0598398	218792
genus.LachnospiraceaeUCG010.id.11330	rs12346653	9	92267239	0.00172963	22.2019	C	T	0.0657686	0.0139569	2.7e-06	12816	C	T	0.035	0.0195	0.0718092	218792
genus.LachnospiraceaeUCG010.id.11330	rs17730011	6	84772845	0.00150973	19.9949	G	A	-0.0702357	0.015706	7.85e-06	13226	G	A	-0.0013	0.0194	0.9484	218792
genus.LachnospiraceaeUCG010.id.11330	rs2153460	9	85576178	0.00144015	19.0864	A	T	-0.0684038	0.0156562	9.17e-06	13236	A	T	0.0222	0.0213	0.2983	218792
genus.LachnospiraceaeUCG010.id.11330	rs2833528	21	33193567	0.00146082	19.3564	C	T	-0.0562148	0.0127763	9.92e-06	13233	C	T	0.0212	0.0164	0.1958	218792
genus.LachnospiraceaeUCG010.id.11330	rs336138	5	8146371	0.00155193	20.5701	G	T	0.0779543	0.0171865	7.48e-06	13236	G	T	0.0012	0.0247	0.9604	218792
genus.LachnospiraceaeUCG010.id.11330	rs4576377	7	81410263	0.00153049	20.2687	A	C	-0.0572001	0.0127043	7.63e-06	13225	A	C	0.0001	0.0165	0.9938	218792
genus.LachnospiraceaeUCG010.id.11330	rs72761829	1	224897491	0.0019057	21.9306	A	T	0.111884	0.0238893	2.58e-06	11488	A	T	0.003	0.0281	0.9138	218792
genus.LachnospiraceaeUCG010.id.11330	rs72894957	2	185862591	0.00481421	20.869	G	A	0.222263	0.0486425	5.68e-06	4316	G	A	-0.0088	0.0531	0.8685	218792
genus.LachnospiraceaeUCG010.id.11330	rs74315802	14	29872341	0.00175412	22.3393	G	T	0.0867262	0.0183477	3.19e-06	12715	G	T	-0.036	0.0209	0.0848809	218792
genus.LachnospiraceaeUCG010.id.11330	rs9981767	21	44079875	0.00191809	24.6256	A	C	0.0655062	0.0131994	9.96e-07	12816	A	C	-0.0052	0.0183	0.776599	218792
genus.Lactobacillus.id.1837	rs12693845	2	199312684	0.00295296	20.6016	C	T	-0.0805447	0.0177429	8.96e-06	6958	C	T	0.0025	0.0164	0.8797	218792
genus.Lactobacillus.id.1837	rs1530559	2	135755629	0.00304921	20.3484	G	A	0.0804001	0.0178207	4.93e-06	6655	G	A	-0.017	0.0161	0.2908	218792
genus.Lactobacillus.id.1837	rs16861661	1	18501459	0.00430983	23.0405	G	A	-0.183147	0.038148	1.28e-06	5325	G	A	-0.0419	0.0323	0.1944	218792
genus.Lactobacillus.id.1837	rs328312	16	73890910	0.00331854	23.134	T	A	0.0815092	0.0169441	1.41e-06	6950	T	A	-0.0116	0.0159	0.4675	218792
genus.Lactobacillus.id.1837	rs6092149	20	54192992	0.00315185	21.8292	A	T	-0.0801344	0.017149	3.29e-06	6906	A	T	0.003	0.0161	0.8533	218792
genus.Lactobacillus.id.1837	rs62314653	4	109896462	0.00379212	22.6185	C	A	0.187692	0.0394585	2.24e-06	5944	C	A	0.009	0.0338	0.7896	218792
genus.Lactobacillus.id.1837	rs7399658	13	23834968	0.003513	23.3063	G	A	-0.107134	0.0221883	3.12e-06	6613	G	A	0.0123	0.0207	0.554	218792
genus.Lactobacillus.id.1837	rs75127669	6	151032614	0.00295591	20.2724	C	A	0.139784	0.0310414	6.83e-06	6840	C	A	-0.009	0.0306	0.768799	218792
genus.Lactobacillus.id.1837	rs768253	8	69010103	0.00304499	21.2456	T	G	-0.079195	0.0171791	4.25e-06	6958	T	G	0.0097	0.0159	0.5419	218792
genus.Lactobacillus.id.1837	rs77478751	3	173151665	0.0057883	21.3493	A	G	-0.219886	0.0475759	7.33e-06	3669	A	G	-0.0167	0.0248	0.5011	218792
genus.Lactobacillus.id.1837	rs921925	19	6928017	0.00336817	23.4879	A	C	0.0985077	0.0203229	9.72e-07	6952	A	C	-0.0299	0.0193	0.1218	218792
genus.Lactococcus.id.1851	rs10417872	19	28767353	0.00570582	23.2641	T	G	0.118306	0.024522	1.29e-06	4056	T	G	-0.0039	0.0176	0.8249	218792
genus.Lactococcus.id.1851	rs123059	17	2699935	0.00654429	24.7555	T	C	-0.13671	0.0274694	1.27e-06	3760	T	C	-0.0006	0.0193	0.9742	218792
genus.Lactococcus.id.1851	rs12621813	2	31266049	0.00500624	20.4025	G	A	0.108423	0.0239978	6.61e-06	4057	G	A	-0.0097	0.0179	0.5868	218792
genus.Lactococcus.id.1851	rs17168302	7	14650221	0.00504565	20.3915	G	A	0.191857	0.0424761	6.29e-06	4023	G	A	0.0029	0.0259	0.9119	218792
genus.Lactococcus.id.1851	rs2293361	2	54114864	0.00561099	21.3574	C	T	-0.199221	0.0430969	1.4e-06	3787	C	T	0.0417	0.0351	0.2348	218792
genus.Lactococcus.id.1851	rs34757988	18	64699550	0.00698545	28.5112	G	C	0.122294	0.0228976	8.95e-08	4055	G	C	0.018	0.0163	0.2687	218792
genus.Lactococcus.id.1851	rs4766997	12	113161438	0.00566945	23.0979	C	T	0.114599	0.023839	2.06e-06	4053	C	T	0.0287	0.016	0.0738907	218792
genus.Lactococcus.id.1851	rs55910161	10	71518643	0.00588141	22.6827	C	T	0.146426	0.0307367	2.36e-06	3836	C	T	-0.0365	0.0253	0.1498	218792
genus.Lactococcus.id.1851	rs6674304	1	116887742	0.00530096	20.608	C	T	0.200758	0.0442121	6.18e-06	3869	C	T	-0.0098	0.0418	0.8155	218792
genus.Lactococcus.id.1851	rs757872	22	31532568	0.00682506	26.0447	G	C	0.140799	0.027582	4.37e-07	3792	G	C	0.0076	0.0212	0.7201	218792
genus.Lactococcus.id.1851	rs7992246	13	113472525	0.00500264	20.3877	T	C	0.104232	0.0230786	4.45e-06	4057	T	C	0.0499	0.0163	0.00215899	218792
genus.Marvinbryantia.id.2005	rs11620597	13	86079090	0.00175013	19.336	T	C	0.119479	0.0271688	7.8e-06	11031	T	C	-0.0101	0.0513	0.8437	218792
genus.Marvinbryantia.id.2005	rs11645029	16	5938448	0.00181012	21.2295	G	C	-0.060618	0.0131551	4.15e-06	11709	G	C	-0.0325	0.0159	0.0411898	218792
genus.Marvinbryantia.id.2005	rs1187983	1	58441860	0.00196739	23.4463	C	T	-0.0935456	0.0193174	2.02e-06	11896	C	T	0.0098	0.0262	0.709499	218792
genus.Marvinbryantia.id.2005	rs146541147	19	4542097	0.00181551	19.5995	G	A	0.118845	0.0268423	6.86e-06	10778	G	A	-0.0655	0.0444	0.1402	218792
genus.Marvinbryantia.id.2005	rs2724813	10	12516924	0.00216415	25.1759	A	G	-0.0840769	0.0167551	6.28e-07	11610	A	G	0.0149	0.0187	0.4247	218792
genus.Marvinbryantia.id.2005	rs2842896	6	132881664	0.00208967	24.515	C	T	-0.0649396	0.0131146	7.25e-07	11709	C	T	-0.0259	0.0162	0.1098	218792
genus.Marvinbryantia.id.2005	rs2863363	3	166039765	0.00181161	21.6844	A	G	0.0634861	0.0136323	3.11e-06	11950	A	G	0.0274	0.0184	0.1354	218792
genus.Marvinbryantia.id.2005	rs3125832	1	211400180	0.00174581	20.4739	A	C	0.0679323	0.015012	5.03e-06	11709	A	C	-0.0405	0.0191	0.03378	218792
genus.Marvinbryantia.id.2005	rs61884471	11	45826561	0.00216546	25.0806	G	A	0.124426	0.0248431	1.01e-06	11559	G	A	0.0453	0.0254	0.0743207	218792
genus.Marvinbryantia.id.2005	rs72948274	11	79518683	0.0018602	21.5421	A	C	-0.126354	0.0272212	3.26e-06	11561	A	C	-0.1028	0.0326	0.00159001	218792
genus.Marvinbryantia.id.2005	rs8006832	14	21577837	0.00168983	19.3136	G	T	-0.0952415	0.0216699	6.58e-06	11412	G	T	0.01	0.0278	0.7186	218792
genus.Methanobrevibacter.id.123	rs10202904	2	125440268	0.00617426	22.2474	T	G	-0.112811	0.0239106	3.09e-06	3583	T	G	-0.0219	0.0162	0.1755	218792
genus.Methanobrevibacter.id.123	rs11018665	11	89349287	0.00547551	19.7323	A	T	0.113013	0.0254343	7.03e-06	3586	A	T	0.012	0.0185	0.517201	218792
genus.Methanobrevibacter.id.123	rs1334944	10	112266046	0.00563712	20.318	T	C	0.115197	0.0255492	7.61e-06	3586	T	C	-0.0116	0.0177	0.5133	218792
genus.Methanobrevibacter.id.123	rs4779844	15	31516919	0.0054231	19.5369	G	C	0.109639	0.0247979	9.28e-06	3585	G	C	-0.0015	0.0167	0.9303	218792
genus.Methanobrevibacter.id.123	rs4802933	19	52925820	0.00537352	19.3627	A	G	-0.135628	0.0308139	9.74e-06	3586	A	G	-0.0153	0.0188	0.4156	218792
genus.Methanobrevibacter.id.123	rs6776814	3	15053083	0.00613025	20.2374	T	C	-0.188956	0.0419905	8.05e-06	3283	T	C	0.0247	0.056	0.6592	218792
genus.Methanobrevibacter.id.123	rs76029318	13	41963791	0.00705357	24.0459	T	C	0.222849	0.0454319	1.08e-06	3387	T	C	0.045	0.0327	0.1682	218792
genus.Methanobrevibacter.id.123	rs894996	4	104418307	0.00630195	22.0509	C	A	0.214213	0.0456045	3.82e-06	3479	C	A	-0.0029	0.031	0.9254	218792
genus.Odoribacter.id.952	rs10093869	8	1266824	0.00149121	21.2308	A	G	-0.0577795	0.0125389	3.67e-06	14218	A	G	-0.0199	0.0161	0.216	218792
genus.Odoribacter.id.952	rs10423795	19	49523088	0.0014593	20.6544	C	T	0.0550695	0.0121164	6.58e-06	14135	C	T	-0.0046	0.0164	0.7772	218792
genus.Odoribacter.id.952	rs16918425	11	6848360	0.00145595	19.9566	A	T	0.0999781	0.0223785	8.85e-06	13689	A	T	0.0153	0.0373	0.681999	218792
genus.Odoribacter.id.952	rs28417404	14	70944224	0.00137858	20.2876	A	G	-0.0726896	0.0161372	3.68e-06	14698	A	G	-0.0151	0.0267	0.5726	218792
genus.Odoribacter.id.952	rs4793970	17	46763962	0.00135395	19.9098	A	G	-0.0576329	0.0129154	6.03e-06	14687	A	G	0.0104	0.0166	0.5315	218792
genus.Odoribacter.id.952	rs503751	15	58063881	0.00189872	27.0435	C	G	0.0618294	0.0118887	2.08e-07	14218	C	G	0.0319	0.0158	0.0441804	218792
genus.Odoribacter.id.952	rs6856150	4	11907559	0.00141164	20.6321	G	A	0.0881922	0.0194146	6.06e-06	14597	G	A	-0.0122	0.0242	0.615	218792
genus.Odoribacter.id.952	rs74553962	8	69677480	0.00178839	21.1426	T	G	0.121449	0.0264106	9.49e-06	11803	T	G	-0.0406	0.0303	0.1802	218792
genus.Odoribacter.id.952	rs77779484	12	67655943	0.00206633	24.7086	G	A	-0.133489	0.0268526	6.56e-07	11935	G	A	0.0218	0.0332	0.5117	218792
genus.Olsenella.id.822	rs1035588	2	150077190	0.00554536	20.8386	A	G	-0.108148	0.0236848	4.86e-06	3739	A	G	0.0052	0.0164	0.749799	218792
genus.Olsenella.id.822	rs17148768	10	10777085	0.00614891	22.5576	G	A	0.140434	0.0295602	2.2e-06	3648	G	A	-0.0165	0.0213	0.4401	218792
genus.Olsenella.id.822	rs2759329	1	231960352	0.00583552	21.9353	G	A	-0.111131	0.0237218	3.43e-06	3739	G	A	-0.008	0.0164	0.6277	218792
genus.Olsenella.id.822	rs35225860	1	247642270	0.00588422	21.4743	A	G	-0.223604	0.0482391	3.87e-06	3630	A	G	0.0577	0.0405	0.1547	218792
genus.Olsenella.id.822	rs61090148	4	174810498	0.00545678	20.5039	A	G	-0.104783	0.0231343	6.44e-06	3739	A	G	-0.0027	0.016	0.8679	218792
genus.Olsenella.id.822	rs62112538	19	4925018	0.00656984	23.993	C	T	-0.19943	0.0407033	1.19e-06	3630	C	T	-0.0234	0.0255	0.3593	218792
genus.Olsenella.id.822	rs72691585	9	21884425	0.00737606	22.8573	C	A	-0.249079	0.0520814	2.95e-06	3078	C	A	0.0084	0.0234	0.7204	218792
genus.Olsenella.id.822	rs7540303	1	179629191	0.00555654	20.8808	C	T	0.108044	0.023638	5.32e-06	3739	C	T	0.0182	0.0164	0.2685	218792
genus.Olsenella.id.822	rs8066522	17	59632873	0.00522529	19.6295	G	A	-0.106529	0.0240379	9.7e-06	3739	G	A	-0.0419	0.0169	0.0131501	218792
genus.Olsenella.id.822	rs9460691	6	10422207	0.00530508	19.9308	C	A	0.119966	0.0268645	7.28e-06	3739	C	A	-0.0201	0.0203	0.3208	218792
genus.Oscillibacter.id.2063	rs11627628	14	21479605	0.0028911	24.5992	T	C	0.143961	0.0290223	1.01e-06	8486	T	C	-0.0148	0.03	0.6233	218792
genus.Oscillibacter.id.2063	rs11990279	8	11116314	0.00244444	20.8923	T	C	-0.0824934	0.0180457	4.94e-06	8528	T	C	0.0299	0.0226	0.1864	218792
genus.Oscillibacter.id.2063	rs12417956	11	25973451	0.00227511	20.3539	C	G	0.0785431	0.0174075	6.03e-06	8928	C	G	-0.0098	0.0177	0.582599	218792
genus.Oscillibacter.id.2063	rs12649930	4	3656291	0.00248811	21.93	T	G	0.121589	0.0259612	4.09e-06	8794	T	G	0.0198	0.0265	0.4555	218792
genus.Oscillibacter.id.2063	rs133832	22	44834707	0.00268076	23.9874	A	C	-0.0795527	0.0162411	1.15e-06	8926	A	C	0.0149	0.0176	0.3971	218792
genus.Oscillibacter.id.2063	rs137917150	12	82366390	0.00352838	20.2927	T	A	-0.174992	0.0388394	4.62e-06	5733	T	A	0.028	0.0274	0.3061	218792
genus.Oscillibacter.id.2063	rs16866406	2	179457147	0.00250498	22.4206	A	G	0.0988765	0.0208795	3.08e-06	8930	A	G	-0.0131	0.0219	0.5506	218792
genus.Oscillibacter.id.2063	rs16934185	9	1798324	0.0024873	21.1698	A	G	-0.129568	0.028157	4.38e-06	8492	A	G	0.0139	0.026	0.5933	218792
genus.Oscillibacter.id.2063	rs234108	1	184942671	0.00276624	24.1109	A	G	0.0749553	0.0152632	9.16e-07	8694	A	G	0.0035	0.0162	0.8269	218792
genus.Oscillibacter.id.2063	rs36095275	14	32270129	0.00263914	23.0001	C	T	-0.0752368	0.0156861	1.4e-06	8694	C	T	0.0209	0.0161	0.1946	218792
genus.Oscillibacter.id.2063	rs4506202	8	21598077	0.00250408	21.8201	A	G	-0.0711323	0.0152261	3.21e-06	8694	A	G	-0.0033	0.016	0.835	218792
genus.Oscillibacter.id.2063	rs61883564	11	79013843	0.00234931	21.024	A	G	-0.101351	0.0221016	3.39e-06	8930	A	G	0.0151	0.0231	0.5131	218792
genus.Oscillibacter.id.2063	rs6901560	6	36931994	0.0024482	20.9172	C	G	0.0855032	0.018693	6.21e-06	8525	C	G	0.0109	0.0204	0.593	218792
genus.Oscillibacter.id.2063	rs75453768	10	116469806	0.00249696	20.6615	G	T	0.12212	0.0268629	5.35e-06	8256	G	T	0.0044	0.0269	0.8713	218792
genus.Oscillibacter.id.2063	rs761240	20	49507892	0.00396481	20.6314	T	G	-0.17664	0.0388812	2.04e-06	5185	T	G	-0.0034	0.0368	0.9271	218792
genus.Oscillibacter.id.2063	rs9393920	6	28580593	0.00271311	24.2885	A	G	-0.0744662	0.0151081	9.92e-07	8930	A	G	-0.0043	0.0166	0.7941	218792
genus.Oscillospira.id.2064	rs12206468	6	18093691	0.00253891	24.3134	G	A	-0.133016	0.0269733	1.04e-06	9554	G	A	-0.0025	0.0295	0.9322	218792
genus.Oscillospira.id.2064	rs12925026	16	89792856	0.0023766	19.5297	T	C	0.13559	0.030678	9.31e-06	8200	T	C	-0.0745	0.0341	0.0290898	218792
genus.Oscillospira.id.2064	rs1954532	14	28151415	0.00225359	22.2232	T	C	-0.0826246	0.0175252	2.27e-06	9841	T	C	-0.0092	0.02	0.643701	218792
genus.Oscillospira.id.2064	rs28889936	4	89483300	0.00208087	20.3433	A	C	0.114051	0.0252838	3.37e-06	9758	A	C	0.0101	0.027	0.7085	218792
genus.Oscillospira.id.2064	rs62422654	6	170474630	0.00210142	20.5678	C	T	0.0898456	0.0198088	6.47e-06	9769	C	T	-0.0491	0.0196	0.0120099	218792
genus.Oscillospira.id.2064	rs72866977	6	56160483	0.00235622	21.4828	A	C	-0.130569	0.0281674	5.63e-06	9098	A	C	0.0173	0.0297	0.561	218792
genus.Oscillospira.id.2064	rs73038677	3	172373615	0.00238164	24.334	T	A	-0.08321	0.0168666	1.09e-06	10195	T	A	-0.0111	0.0231	0.6294	218792
genus.Oscillospira.id.2064	rs751183	1	76803093	0.00205007	20.2121	T	C	-0.0774322	0.0172216	6.85e-06	9841	T	C	-0.0291	0.0206	0.1574	218792
genus.Oscillospira.id.2064	rs8076323	17	14881860	0.00204481	20.8814	A	G	0.0715392	0.0156539	5.61e-06	10193	A	G	0.0251	0.0169	0.137	218792
genus.Oxalobacter.id.2978	rs10464997	8	20902693	0.00466939	21.8051	G	A	0.137691	0.0294804	3.3e-06	4650	G	A	0.005	0.0205	0.808	218792
genus.Oxalobacter.id.2978	rs11108500	12	96819204	0.00501952	21.6979	A	G	-0.199099	0.0427327	3.74e-06	4303	A	G	-0.0269	0.0282	0.3404	218792
genus.Oxalobacter.id.2978	rs111966731	15	93941937	0.00516759	20.4089	T	C	0.213114	0.047162	7.3e-06	3931	T	C	-0.0359	0.0282	0.202	218792
genus.Oxalobacter.id.2978	rs12002250	9	19682558	0.0050199	21.6693	A	C	0.217122	0.0466317	1.42e-06	4297	A	C	0.0542	0.0392	0.1674	218792
genus.Oxalobacter.id.2978	rs1569853	6	38550301	0.0047892	21.607	T	C	-0.138078	0.0296981	3.65e-06	4492	T	C	0.0278	0.0243	0.2536	218792
genus.Oxalobacter.id.2978	rs36057338	4	189935314	0.0056985	24.3116	G	T	0.207847	0.0421439	8.8e-07	4244	G	T	0.068	0.0444	0.1259	218792
genus.Oxalobacter.id.2978	rs3862635	11	126582578	0.00425268	19.0778	C	T	-0.172142	0.0394026	9.19e-06	4469	C	T	-0.0255	0.0275	0.3543	218792
genus.Oxalobacter.id.2978	rs4428215	3	171947435	0.00617658	28.9183	G	A	0.130293	0.0242237	7.51e-08	4655	G	A	0.0167	0.0182	0.3588	218792
genus.Oxalobacter.id.2978	rs6000536	22	37421469	0.00569099	26.626	C	T	-0.130992	0.0253804	2.06e-07	4654	C	T	0.0077	0.0212	0.7154	218792
genus.Oxalobacter.id.2978	rs6071435	20	59502888	0.00517455	24.0984	T	A	-0.105512	0.021489	1.07e-06	4635	T	A	0.0125	0.0164	0.4459	218792
genus.Oxalobacter.id.2978	rs6993398	8	115560689	0.00445026	20.8041	G	A	0.127217	0.0278855	7.13e-06	4656	G	A	0.0018	0.0205	0.9313	218792
genus.Oxalobacter.id.2978	rs736744	9	87514407	0.0066441	31.1218	C	T	0.117882	0.0211262	2.57e-08	4655	C	T	-0.0136	0.016	0.3955	218792
genus.Parabacteroides.id.954	rs115602804	3	191572365	0.00130472	21.4149	G	A	0.10308	0.0222736	1.93e-06	16394	G	A	-0.0036	0.0257	0.8902	218792
genus.Parabacteroides.id.954	rs11965579	6	165969505	0.00465207	18.1718	G	C	0.162824	0.0381863	8.87e-06	3890	G	C	0.0246	0.0535	0.6454	218792
genus.Parabacteroides.id.954	rs3860755	5	169360155	0.00132567	22.954	G	C	0.0558784	0.0116625	1.71e-06	17294	G	C	-0.0081	0.017	0.631801	218792
genus.Parabacteroides.id.954	rs4236095	6	47368687	0.00143489	23.5387	G	A	0.0761961	0.0157042	1.93e-06	16383	G	A	-0.0399	0.0263	0.1287	218792
genus.Parabacteroides.id.954	rs60884758	9	2217340	0.00140902	24.3978	C	T	-0.0702667	0.0142249	5.71e-07	17293	C	T	-0.0075	0.0207	0.716	218792
genus.Parabacteroides.id.954	rs6657302	1	85585609	0.00129601	21.4768	T	C	-0.10452	0.0225521	9.76e-06	16552	T	C	0.041	0.0326	0.2082	218792
genus.Parabacteroides.id.954	rs72893646	2	38037203	0.00126221	20.8604	A	T	-0.0715594	0.0156668	8.83e-06	16508	A	T	0.0027	0.0236	0.9076	218792
genus.Parabacteroides.id.954	rs7298818	12	56396953	0.00118416	19.5712	C	T	0.0888832	0.0200902	8.54e-06	16510	C	T	0.0155	0.0263	0.5551	218792
genus.Paraprevotella.id.962	rs10842464	12	25249743	0.00268223	19.2994	T	C	-0.0758215	0.0172568	6.6e-06	7178	T	C	-0.0124	0.0173	0.4746	218792
genus.Paraprevotella.id.962	rs140997932	3	149298792	0.00338567	21.0115	T	C	-0.162376	0.0354178	2.11e-06	6187	T	C	0.0239	0.0346	0.4912	218792
genus.Paraprevotella.id.962	rs145020347	11	114526679	0.00328112	22.5727	A	G	-0.12465	0.0262323	4.03e-06	6859	A	G	-0.0126	0.0225	0.5759	218792
genus.Paraprevotella.id.962	rs17109926	12	71978728	0.00290325	20.8973	A	G	-0.0988335	0.0216172	6.75e-06	7179	A	G	-0.0148	0.0179	0.4072	218792
genus.Paraprevotella.id.962	rs17785622	6	83459314	0.00676219	22.3718	A	G	0.248065	0.0524304	1.93e-06	3288	A	G	-0.0445	0.042	0.2894	218792
genus.Paraprevotella.id.962	rs2081023	5	174606261	0.00372725	26.8468	A	G	-0.122561	0.0236507	2.64e-07	7178	A	G	-0.0007	0.0226	0.9737	218792
genus.Paraprevotella.id.962	rs3008582	1	195971173	0.00300742	21.6373	T	C	0.10572	0.0227246	4.36e-06	7175	T	C	0.0167	0.0203	0.4107	218792
genus.Paraprevotella.id.962	rs3801748	7	81759508	0.00286465	20.6187	G	A	0.0779721	0.0171691	5.2e-06	7179	G	A	-0.0042	0.0165	0.7985	218792
genus.Paraprevotella.id.962	rs4756632	11	41079703	0.00318787	22.9525	G	T	-0.138905	0.0289897	3.82e-06	7179	G	T	-0.0223	0.0236	0.3451	218792
genus.Paraprevotella.id.962	rs4767113	12	114131978	0.00332901	23.0402	C	T	0.0882466	0.018382	2.14e-06	6900	C	T	0.0224	0.0169	0.1858	218792
genus.Paraprevotella.id.962	rs7240324	18	69623804	0.00293556	20.3091	T	G	-0.10229	0.0226948	5.96e-06	6900	T	G	-0.0134	0.0185	0.4673	218792
genus.Paraprevotella.id.962	rs9602779	13	86162420	0.00325849	23.4561	A	C	-0.106692	0.0220264	6.93e-07	7177	A	C	-0.0042	0.0185	0.8191	218792
genus.Paraprevotella.id.962	rs9900242	17	69135631	0.00342294	23.6926	A	G	-0.0852967	0.0175212	1.14e-06	6900	A	G	0.0305	0.0167	0.0668005	218792
genus.Parasutterella.id.2892	rs10899911	10	44293839	0.00205346	23.4247	A	G	-0.0717102	0.0148151	1.15e-06	11386	A	G	-0.0066	0.0188	0.724299	218792
genus.Parasutterella.id.2892	rs11715853	3	30163689	0.00180478	20.5828	G	A	-0.0662952	0.0146114	6.23e-06	11386	G	A	-0.0293	0.0174	0.0917593	218792
genus.Parasutterella.id.2892	rs1403396	12	126498824	0.00198595	22.6371	A	T	-0.0756729	0.0159035	2.76e-06	11378	A	T	0.0351	0.0193	0.0698393	218792
genus.Parasutterella.id.2892	rs2090816	6	137615592	0.00197187	22.4901	A	C	0.0840967	0.0177315	2.9e-06	11385	A	C	-0.0219	0.0207	0.2888	218792
genus.Parasutterella.id.2892	rs35055552	8	114804024	0.00216714	21.649	T	C	0.109554	0.0235433	3.35e-06	9970	T	C	-0.0319	0.0231	0.1667	218792
genus.Parasutterella.id.2892	rs35414597	4	15565736	0.00203519	23.2158	T	A	-0.0684946	0.0142143	1.51e-06	11386	T	A	-0.0182	0.0173	0.2942	218792
genus.Parasutterella.id.2892	rs55877868	17	14692867	0.00197696	20.9696	A	C	-0.104458	0.0228089	2.87e-06	10588	A	C	-0.0181	0.0263	0.491801	218792
genus.Parasutterella.id.2892	rs62273907	3	156550415	0.0056233	20.8617	A	G	0.229468	0.0502262	5.88e-06	3691	A	G	0.0351	0.0316	0.2662	218792
genus.Parasutterella.id.2892	rs6809952	3	193896709	0.00185681	20.6024	G	A	-0.0684957	0.0150892	8.13e-06	11077	G	A	-0.0058	0.0182	0.7485	218792
genus.Parasutterella.id.2892	rs6828768	4	65556925	0.00202043	23.0472	C	T	0.0636852	0.0132645	1.78e-06	11386	C	T	0.005	0.0159	0.7546	218792
genus.Parasutterella.id.2892	rs7303158	12	5275540	0.00203468	23.2101	C	T	0.0646859	0.0134256	1.33e-06	11386	C	T	-0.0265	0.0159	0.0960904	218792
genus.Parasutterella.id.2892	rs7311004	12	53260710	0.00179621	20.4812	T	C	-0.0617522	0.0136438	5.92e-06	11384	T	C	-0.0017	0.016	0.9158	218792
genus.Parasutterella.id.2892	rs7572229	2	72235444	0.00218519	24.9242	G	A	0.066273	0.0132736	6.32e-07	11383	G	A	-0.0057	0.0159	0.7208	218792
genus.Parasutterella.id.2892	rs78383039	2	178954708	0.00263638	24.2448	T	C	-0.146315	0.0297119	1.57e-06	9174	T	C	-0.0012	0.0403	0.9755	218792
genus.Parasutterella.id.2892	rs8039785	15	67316307	0.00189529	21.6113	T	G	0.0618345	0.0133	3.62e-06	11383	T	G	-0.0137	0.0159	0.3893	218792
genus.Parasutterella.id.2892	rs823424	8	16674526	0.00181133	20.6576	G	A	-0.0713448	0.0156958	4.95e-06	11386	G	A	-0.0131	0.0182	0.4731	218792
genus.Peptococcus.id.2037	rs10031059	4	35358594	0.0051818	28.7734	T	C	-0.121167	0.0225844	1.24e-07	5526	T	C	0.0391	0.0186	0.0358303	218792
genus.Peptococcus.id.2037	rs11001941	10	78716030	0.00441654	24.8645	G	A	-0.195611	0.0392217	1.33e-06	5607	G	A	0.0202	0.0282	0.4732	218792
genus.Peptococcus.id.2037	rs11030569	11	4019788	0.00404335	21.6263	A	T	-0.17402	0.0374133	3.13e-06	5329	A	T	0.0436	0.024	0.0688605	218792
genus.Peptococcus.id.2037	rs12069354	1	216223782	0.0036323	19.5036	C	T	0.16763	0.03795	9.28e-06	5352	C	T	0.0469	0.0326	0.1504	218792
genus.Peptococcus.id.2037	rs2054133	2	33691809	0.00398017	22.5978	G	A	0.0895433	0.0188332	2.14e-06	5657	G	A	0.021	0.0166	0.2056	218792
genus.Peptococcus.id.2037	rs34282744	15	75073172	0.00435807	23.0019	G	C	0.191797	0.0399832	1.84e-06	5257	G	C	-0.0011	0.0292	0.9702	218792
genus.Peptococcus.id.2037	rs36121075	20	43118017	0.00396355	21.0864	A	G	-0.14067	0.030628	6.99e-06	5301	A	G	-0.0285	0.0213	0.1817	218792
genus.Peptococcus.id.2037	rs413827	14	57985112	0.00391328	21.529	G	A	0.110229	0.0237523	3.3e-06	5482	G	A	0.0112	0.0186	0.5488	218792
genus.Peptococcus.id.2037	rs5770862	22	50973113	0.00378197	20.6103	T	C	0.162018	0.0356813	3.22e-06	5431	T	C	-0.0284	0.0273	0.2993	218792
genus.Peptococcus.id.2037	rs62424012	6	99020209	0.0038825	22.0372	G	A	0.137164	0.0292136	1.15e-06	5656	G	A	0.0055	0.0332	0.869	218792
genus.Peptococcus.id.2037	rs7033353	9	104595848	0.00396606	22.5174	T	G	0.090152	0.018995	2.22e-06	5657	T	G	0.0051	0.0159	0.747799	218792
genus.Peptococcus.id.2037	rs72850165	11	968356	0.00353911	19.9782	T	C	-0.134304	0.0300423	5.74e-06	5627	T	C	0.0245	0.0295	0.4064	218792
genus.Peptococcus.id.2037	rs74592222	1	75971700	0.00387588	20.7272	G	A	0.137957	0.0302965	8.55e-06	5329	G	A	0.079	0.0249	0.001483	218792
genus.Peptococcus.id.2037	rs75754569	3	17793504	0.00585169	32.2501	C	G	0.181434	0.0319429	1.1e-08	5481	C	G	-0.027	0.0273	0.3227	218792
genus.Peptococcus.id.2037	rs7766680	6	162239191	0.00366569	20.7984	G	C	0.0976832	0.0214155	3.51e-06	5655	G	C	-0.0075	0.019	0.6916	218792
genus.Peptococcus.id.2037	rs77681628	13	91182556	0.00549312	26.7336	C	T	0.200307	0.0387328	2.69e-07	4842	C	T	-0.0411	0.0292	0.1599	218792
genus.Phascolarctobacterium.id.2168	rs11929846	4	17054934	0.0017496	19.4756	T	C	-0.0697199	0.0157969	8.88e-06	11114	T	C	-0.0327	0.0193	0.0897408	218792
genus.Phascolarctobacterium.id.2168	rs12618201	2	174436533	0.001936	21.5526	A	G	0.0641657	0.0138202	3.38e-06	11113	A	G	-0.0118	0.016	0.4603	218792
genus.Phascolarctobacterium.id.2168	rs1264476	8	102434276	0.00191966	21.353	T	G	0.0767335	0.0166041	4.3e-06	11104	T	G	0.0067	0.0203	0.7431	218792
genus.Phascolarctobacterium.id.2168	rs28525131	14	21358155	0.00185658	19.4466	G	A	-0.118657	0.0269048	8.23e-06	10457	G	A	-0.0017	0.037	0.9641	218792
genus.Phascolarctobacterium.id.2168	rs56069061	3	168339417	0.00211045	23.2746	G	A	-0.111306	0.0230694	1.87e-06	11007	G	A	-0.0129	0.0319	0.6856	218792
genus.Phascolarctobacterium.id.2168	rs56157888	4	183252836	0.00240987	24.227	A	C	0.0954864	0.0193976	1.09e-06	10031	A	C	-0.0112	0.0192	0.558399	218792
genus.Phascolarctobacterium.id.2168	rs6427992	1	203102563	0.00202179	22.5097	G	C	-0.0652458	0.0137508	2.09e-06	11113	G	C	0.008	0.0164	0.6268	218792
genus.Phascolarctobacterium.id.2168	rs74540770	3	186553389	0.00232312	21.8905	G	A	-0.121014	0.0258621	3.6e-06	9403	G	A	0.0018	0.0293	0.952	218792
genus.Phascolarctobacterium.id.2168	rs75882962	12	53098742	0.00240644	25.8303	T	C	0.0968661	0.0190575	3.19e-07	10710	T	C	-0.0186	0.024	0.4387	218792
genus.Phascolarctobacterium.id.2168	rs76124218	17	73584441	0.00291663	21.3888	C	G	-0.159361	0.0344532	2.67e-06	7314	C	G	-0.0904	0.0425	0.0334203	218792
genus.Phascolarctobacterium.id.2168	rs7982713	13	71376322	0.001849	19.8358	G	A	0.0726922	0.0163201	9.72e-06	10710	G	A	0.0071	0.0177	0.687299	218792
genus.Prevotella7.id.11182	rs118038478	16	47237609	0.00580483	19.2269	A	G	0.205676	0.0468917	7.85e-06	3295	A	G	-0.0235	0.031	0.4484	218792
genus.Prevotella7.id.11182	rs12124567	1	3343802	0.00588887	19.4358	A	G	-0.121281	0.0275017	9.49e-06	3283	A	G	0.0059	0.02	0.7674	218792
genus.Prevotella7.id.11182	rs12195431	6	91019654	0.00562626	19.7298	T	C	0.196528	0.0442322	8.73e-06	3489	T	C	0.0057	0.027	0.8327	218792
genus.Prevotella7.id.11182	rs16937247	11	19943115	0.0049305	17.263	G	C	0.146098	0.0351529	9.64e-06	3486	G	C	-0.0255	0.0199	0.2004	218792
genus.Prevotella7.id.11182	rs2240542	2	242066314	0.00607137	21.3002	C	T	0.12085	0.0261776	4.84e-06	3489	C	T	-0.0271	0.018	0.132	218792
genus.Prevotella7.id.11182	rs2918132	10	133000320	0.00605937	20.2153	C	T	-0.114648	0.0254916	6.42e-06	3318	C	T	-0.0174	0.0165	0.2894	218792
genus.Prevotella7.id.11182	rs430270	3	60474379	0.0065703	21.9312	A	C	0.139155	0.0297055	2.87e-06	3318	A	C	-0.0116	0.0204	0.5687	218792
genus.Prevotella7.id.11182	rs57404562	2	12101762	0.00689285	24.1883	C	A	0.155486	0.0316057	6.22e-07	3487	C	A	-0.0439	0.0237	0.0639794	218792
genus.Prevotella7.id.11182	rs79263163	11	39821773	0.00595216	20.8795	A	C	-0.143982	0.031501	7.51e-06	3489	A	C	0.009	0.0198	0.6484	218792
genus.Prevotella7.id.11182	rs9426434	1	29736216	0.00590601	19.7007	T	C	-0.123657	0.0278514	9.72e-06	3318	T	C	-0.0055	0.0167	0.740399	218792
genus.Prevotella7.id.11182	rs9608249	22	24613952	0.00631551	22.1176	A	G	-0.158213	0.0336317	2.07e-06	3482	A	G	-0.047	0.0251	0.0614894	218792
genus.Prevotella7.id.11182	rs9959718	18	71442664	0.00664324	23.3199	G	A	0.133012	0.0275361	1.9e-06	3489	G	A	0.0114	0.0197	0.5643	218792
genus.Prevotella9.id.11183	rs10512344	9	109009495	0.00670347	20.6578	C	G	0.247373	0.0544087	3.19e-06	3063	C	G	0.0383	0.0575	0.5055	218792
genus.Prevotella9.id.11183	rs111509883	19	639161	0.0034699	24.2276	T	C	0.171131	0.0347624	1.24e-06	6960	T	C	0.0058	0.0258	0.8218	218792
genus.Prevotella9.id.11183	rs11199734	10	122819400	0.00200874	20.6532	A	T	0.0770209	0.0169462	7e-06	10263	A	T	0.004	0.0192	0.8368	218792
genus.Prevotella9.id.11183	rs11685699	2	11232685	0.00273262	22.8525	C	T	-0.141357	0.0295665	2.03e-06	8342	C	T	-0.0348	0.0298	0.2423	218792
genus.Prevotella9.id.11183	rs117271932	22	44236460	0.00455608	22.3171	A	G	0.208089	0.0440393	2.82e-06	4878	A	G	0.0266	0.0342	0.4378	218792
genus.Prevotella9.id.11183	rs12648235	4	161115744	0.00190126	19.5613	T	C	0.0785902	0.0177676	7.39e-06	10271	T	C	-0.0325	0.0188	0.0841705	218792
genus.Prevotella9.id.11183	rs1304512	5	63736025	0.00214841	21.0739	G	A	0.0761593	0.0165885	5.29e-06	9790	G	A	0.0171	0.0179	0.34	218792
genus.Prevotella9.id.11183	rs16966465	15	38518414	0.00196718	20.221	G	C	0.0743348	0.0165291	9.33e-06	10261	G	C	-0.0188	0.0204	0.3589	218792
genus.Prevotella9.id.11183	rs2104588	10	12497581	0.0021228	19.7117	T	C	0.105558	0.023773	8.13e-06	9268	T	C	-0.0063	0.0344	0.8541	218792
genus.Prevotella9.id.11183	rs2495052	1	14161251	0.00201889	19.8008	A	G	0.0838978	0.0188523	8.97e-06	9790	A	G	-0.0201	0.0224	0.3699	218792
genus.Prevotella9.id.11183	rs2683313	8	19115604	0.00222147	22.8386	A	G	-0.0724576	0.0151603	1.69e-06	10260	A	G	0.0204	0.0171	0.2324	218792
genus.Prevotella9.id.11183	rs4968431	17	59421778	0.00191586	19.7118	G	T	0.0640113	0.0144162	8.58e-06	10271	G	T	0.0053	0.0167	0.7524	218792
genus.Prevotella9.id.11183	rs7232121	18	19993452	0.00220786	21.6583	G	C	0.0671292	0.014423	3.76e-06	9790	G	C	-0.0198	0.0161	0.2176	218792
genus.Prevotella9.id.11183	rs7237249	18	71992502	0.00198786	20.454	C	T	-0.0823764	0.0182126	8.93e-06	10271	C	T	0.0193	0.0203	0.3406	218792
genus.Prevotella9.id.11183	rs72815774	2	91954502	0.00349529	20.0842	T	C	-0.176186	0.0393068	8.78e-06	5728	T	C	0.0693	0.0354	0.0504696	218792
genus.Prevotella9.id.11183	rs746764	20	21470713	0.00238719	22.4526	T	C	-0.0915772	0.0193245	2.04e-06	9385	T	C	-0.0396	0.0194	0.0410998	218792
genus.Prevotella9.id.11183	rs7976209	12	1794470	0.00188199	19.3475	T	C	-0.0870786	0.0197951	7.28e-06	10263	T	C	-0.0145	0.0219	0.5082	218792
genus.Prevotella9.id.11183	rs9428102	1	118852817	0.00190281	19.5639	A	G	-0.0778844	0.0176068	4.62e-06	10264	A	G	0.0014	0.0191	0.9424	218792
genus.Prevotella9.id.11183	rs9613013	22	26152738	0.00208888	20.4888	G	A	0.0917591	0.0202697	6.1e-06	9790	G	A	0.0193	0.0242	0.4265	218792
genus.RikenellaceaeRC9gutgroup.id.11191	rs12501673	4	163830516	0.00587361	19.6865	A	G	0.116395	0.0262253	6.29e-06	3334	A	G	0.0412	0.0179	0.0215001	218792
genus.RikenellaceaeRC9gutgroup.id.11191	rs17032291	4	155865671	0.00657093	21.1925	T	C	-0.169579	0.0368251	6.61e-06	3206	T	C	0.0328	0.0241	0.1738	218792
genus.RikenellaceaeRC9gutgroup.id.11191	rs17582787	4	149562638	0.00644421	21.5206	A	G	-0.157739	0.0339924	3.55e-06	3320	A	G	-0.0067	0.0213	0.7541	218792
genus.RikenellaceaeRC9gutgroup.id.11191	rs2074881	19	1970021	0.0057832	19.2712	T	C	-0.142236	0.032391	9.45e-06	3315	T	C	-0.0362	0.0235	0.1239	218792
genus.RikenellaceaeRC9gutgroup.id.11191	rs2900503	9	112657543	0.00831251	27.8121	G	T	-0.172329	0.0326671	1.55e-07	3320	G	T	-0.0215	0.0216	0.3178	218792
genus.RikenellaceaeRC9gutgroup.id.11191	rs2998141	10	135010198	0.00645772	21.631	T	C	-0.136346	0.0293073	4.42e-06	3330	T	C	0.0189	0.0187	0.3114	218792
genus.RikenellaceaeRC9gutgroup.id.11191	rs4270579	4	84698188	0.00565992	18.9491	G	A	-0.118021	0.0271041	5.46e-06	3331	G	A	0.0166	0.017	0.3303	218792
genus.RikenellaceaeRC9gutgroup.id.11191	rs4717843	7	73334987	0.00647709	20.9792	G	T	-0.119376	0.0260548	4.72e-06	3220	G	T	-0.0186	0.016	0.2464	218792
genus.RikenellaceaeRC9gutgroup.id.11191	rs7113155	11	102429543	0.00635467	21.3092	G	C	0.114423	0.0247798	5.26e-06	3334	G	C	0.0229	0.0165	0.1649	218792
genus.RikenellaceaeRC9gutgroup.id.11191	rs7193937	16	76605358	0.00618191	20.0171	G	C	0.124153	0.027741	6.19e-06	3220	G	C	0.0309	0.0167	0.0638102	218792
genus.RikenellaceaeRC9gutgroup.id.11191	rs7712231	5	31406285	0.00592923	19.874	A	G	0.156284	0.0350462	7.97e-06	3334	A	G	-0.0231	0.0234	0.3235	218792
genus.RikenellaceaeRC9gutgroup.id.11191	rs80309088	6	165668732	0.0064583	20.5929	G	A	0.17405	0.0383423	4.56e-06	3170	G	A	-0.0008	0.0244	0.9728	218792
genus.RikenellaceaeRC9gutgroup.id.11191	rs9887954	1	164800873	0.00634752	21.2595	G	A	-0.114849	0.0249013	4.81e-06	3330	G	A	0.0124	0.0162	0.4432	218792
genus.Romboutsia.id.11347	rs10279978	7	5319387	0.0016764	23.7458	A	G	-0.0622202	0.0127675	1.17e-06	14143	A	G	-0.0322	0.0171	0.0596005	218792
genus.Romboutsia.id.11347	rs11221428	11	99665050	0.00148426	21.0855	T	C	-0.0726779	0.0158263	6.49e-06	14187	T	C	0.011	0.0189	0.559099	218792
genus.Romboutsia.id.11347	rs114398731	5	57229635	0.00192257	19.8868	G	C	-0.131039	0.0293815	7.96e-06	10326	G	C	0.0125	0.0352	0.723401	218792
genus.Romboutsia.id.11347	rs16843578	1	171903885	0.00139274	19.7821	C	T	-0.0875276	0.0196779	5.08e-06	14186	C	T	-0.0245	0.0355	0.4897	218792
genus.Romboutsia.id.11347	rs28603357	7	106406824	0.00551854	20.482	T	C	-0.214911	0.0474739	8.52e-06	3693	T	C	0.067	0.0567	0.2373	218792
genus.Romboutsia.id.11347	rs34302036	7	78136725	0.00145979	20.7345	A	G	0.0550261	0.0120835	5.88e-06	14185	A	G	0.028	0.0161	0.0813898	218792
genus.Romboutsia.id.11347	rs61841503	10	17019559	0.00215859	29.3467	G	A	0.092888	0.0171454	4e-08	13568	G	A	0.0241	0.0236	0.3075	218792
genus.Romboutsia.id.11347	rs62504452	7	145760298	0.00144693	20.5414	A	G	-0.0710048	0.0156654	4.66e-06	14178	A	G	0.029	0.0229	0.2047	218792
genus.Romboutsia.id.11347	rs7109293	11	133834657	0.00140933	19.9547	A	G	0.0919112	0.0205738	6.98e-06	14141	A	G	0.0359	0.0249	0.1499	218792
genus.Romboutsia.id.11347	rs75200530	8	5088054	0.00389249	20.492	T	G	-0.190644	0.0421065	5.07e-06	5246	T	G	-0.0002	0.0473	0.9963	218792
genus.Romboutsia.id.11347	rs75987356	2	16066705	0.00203552	21.3431	G	A	-0.129578	0.0280454	6.71e-06	10466	G	A	0.0131	0.03	0.6624	218792
genus.Romboutsia.id.11347	rs77702691	13	88725540	0.00163844	20.4895	A	G	-0.094406	0.0208544	7.37e-06	12487	A	G	-0.0245	0.0281	0.3829	218792
genus.Romboutsia.id.11347	rs9389266	6	135411737	0.00139519	19.8185	T	G	0.0722815	0.0162353	9.38e-06	14187	T	G	0.0042	0.0208	0.8408	218792
genus.Romboutsia.id.11347	rs9567264	13	32720756	0.00145743	20.6937	C	T	0.0580018	0.0127495	5.76e-06	14180	C	T	0.0012	0.0168	0.9422	218792
genus.Roseburia.id.2012	rs116270582	4	119349	0.00239265	21.8182	T	A	-0.153844	0.0329324	1.2e-06	9099	T	A	-0.0179	0.0397	0.6529	218792
genus.Roseburia.id.2012	rs12740451	1	95178974	0.00115471	20.6181	T	C	0.0697527	0.0153607	7.34e-06	17837	T	C	-0.035	0.0233	0.1319	218792
genus.Roseburia.id.2012	rs147990086	1	145673018	0.0010706	19.1178	A	G	-0.0578936	0.01324	8.93e-06	17840	A	G	0.0291	0.0212	0.1699	218792
genus.Roseburia.id.2012	rs16910295	11	12009569	0.00131295	21.884	T	C	-0.0980434	0.020957	2.91e-06	16648	T	C	-0.0371	0.0351	0.2912	218792
genus.Roseburia.id.2012	rs2034589	16	8307948	0.00145521	26.0047	G	C	0.0629765	0.0123489	5.01e-07	17846	G	C	0.0062	0.0208	0.766999	218792
genus.Roseburia.id.2012	rs2160994	12	50650057	0.00137217	23.9663	T	C	0.0550687	0.0112481	9.7e-07	17444	T	C	-0.001	0.0168	0.9521	218792
genus.Roseburia.id.2012	rs2943022	5	89598914	0.00119668	21.3887	T	C	0.0493786	0.0106763	4.11e-06	17854	T	C	-0.0131	0.0161	0.4141	218792
genus.Roseburia.id.2012	rs302266	1	194183650	0.00118245	20.1893	T	C	-0.0777312	0.0172985	8.13e-06	17056	T	C	0.0443	0.0238	0.0630406	218792
genus.Roseburia.id.2012	rs329182	5	125076494	0.00114065	20.3862	T	C	0.0690327	0.0152884	5.9e-06	17854	T	C	-0.0072	0.0216	0.738999	218792
genus.Roseburia.id.2012	rs4748237	10	16051097	0.00117849	21.0597	G	C	0.0488326	0.0106404	4.67e-06	17851	G	C	-0.0183	0.016	0.253	218792
genus.Roseburia.id.2012	rs55858165	15	86512809	0.00358555	19.5936	A	C	0.179284	0.0404954	9.99e-06	5447	A	C	-0.0244	0.0419	0.5605	218792
genus.Roseburia.id.2012	rs57466170	15	37859065	0.0010758	18.6647	C	T	0.0741405	0.0171601	8.3e-06	17333	C	T	-0.0682	0.0302	0.0240503	218792
genus.Roseburia.id.2012	rs6445851	3	57116228	0.00118305	21.1413	G	A	-0.0497336	0.0108158	3.53e-06	17851	G	A	0.0004	0.0164	0.9825	218792
genus.Roseburia.id.2012	rs6930661	6	12774611	0.00129709	22.0052	C	T	-0.0961587	0.0204975	2.48e-06	16945	C	T	0.0252	0.0333	0.450001	218792
genus.Roseburia.id.2012	rs75326254	6	166170836	0.0012903	20.5307	C	T	-0.104628	0.0230897	7.5e-06	15893	C	T	0.0195	0.0335	0.560701	218792
genus.Roseburia.id.2012	rs78753150	5	144135655	0.00125459	20.4768	A	C	0.0968739	0.0214067	9.98e-06	16303	A	C	-0.0122	0.0266	0.6451	218792
genus.Roseburia.id.2012	rs9300744	13	103117486	0.00121576	21.7301	C	T	-0.0588452	0.0126228	4.75e-06	17854	C	T	-0.0535	0.0207	0.00995589	218792
genus.Ruminiclostridium5.id.11355	rs10827477	10	35262588	0.00129739	22.5896	A	G	-0.0547387	0.0115163	2.19e-06	17391	A	G	-0.0043	0.0166	0.7968	218792
genus.Ruminiclostridium5.id.11355	rs113753996	5	32477664	0.00132489	22.1259	T	C	0.0820689	0.0174463	3.99e-06	16680	T	C	-0.0122	0.0205	0.5523	218792
genus.Ruminiclostridium5.id.11355	rs1223978	13	108775162	0.00114956	20.0011	T	C	0.0484169	0.0108254	8.16e-06	17381	T	C	-0.0234	0.016	0.142	218792
genus.Ruminiclostridium5.id.11355	rs1492620	6	50405920	0.00122119	21.2685	T	C	-0.0830505	0.0180073	3.53e-06	17397	T	C	0.0237	0.0237	0.3181	218792
genus.Ruminiclostridium5.id.11355	rs2286384	12	1891043	0.00133773	23.297	G	C	-0.0518814	0.0107482	1.44e-06	17394	G	C	0.0067	0.0158	0.6721	218792
genus.Ruminiclostridium5.id.11355	rs243585	21	19151940	0.00138475	23.4402	C	G	-0.0585939	0.0121017	1.33e-06	16906	C	G	0.0304	0.0179	0.0892997	218792
genus.Ruminiclostridium5.id.11355	rs2482038	10	12835085	0.00130686	22.7613	C	A	0.0518991	0.0108777	1.7e-06	17396	C	A	0.0148	0.0162	0.3612	218792
genus.Ruminiclostridium5.id.11355	rs2791343	8	131316030	0.00119512	20.808	T	C	0.051717	0.0113369	5.54e-06	17392	T	C	-0.0055	0.0162	0.7348	218792
genus.Ruminiclostridium5.id.11355	rs2801960	1	41878680	0.00117669	20.4809	C	G	0.0520975	0.0115111	6.21e-06	17387	C	G	0.0014	0.0174	0.9339	218792
genus.Ruminiclostridium5.id.11355	rs2833828	21	33811886	0.00116481	20.2856	G	A	0.0489617	0.0108702	6.82e-06	17397	G	A	-0.0216	0.0161	0.1802	218792
genus.Ruminiclostridium5.id.11355	rs4955951	3	55243531	0.00106377	18.524	A	G	-0.0713749	0.0165826	9.96e-06	17397	A	G	0.0004	0.0247	0.9883	218792
genus.Ruminiclostridium5.id.11355	rs6121460	20	60293505	0.00126494	21.9314	G	A	0.0932955	0.0199206	2.64e-06	17318	G	A	0.0125	0.0293	0.669	218792
genus.Ruminiclostridium5.id.11355	rs73002572	2	103755970	0.00508508	19.2125	G	C	0.181548	0.0414078	8.82e-06	3761	G	C	0.0044	0.025	0.8586	218792
genus.Ruminiclostridium5.id.11355	rs79968837	20	41177956	0.00145059	24.1148	A	G	-0.0950311	0.0193507	1.15e-06	16602	A	G	-0.0085	0.036	0.814	218792
genus.Ruminiclostridium5.id.11355	rs8053158	16	86769909	0.00124299	21.6487	A	G	-0.0740543	0.0159151	5.9e-06	17397	A	G	0.0019	0.0246	0.9368	218792
genus.Ruminiclostridium6.id.11356	rs10829821	10	132653028	0.00159142	20.4026	T	C	-0.097606	0.0216072	3.47e-06	12802	T	C	0.0068	0.0278	0.8065	218792
genus.Ruminiclostridium6.id.11356	rs116969552	10	128214403	0.00286601	19.6081	A	G	-0.166823	0.0376681	9.16e-06	6824	A	G	-0.0108	0.0477	0.8206	218792
genus.Ruminiclostridium6.id.11356	rs11992182	8	79766499	0.00153478	20.5653	A	C	0.0625299	0.0137876	4.65e-06	13381	A	C	0.0102	0.019	0.5911	218792
genus.Ruminiclostridium6.id.11356	rs1871858	15	61047117	0.00153769	19.7374	C	G	-0.105422	0.0237274	9.12e-06	12818	C	G	0.0025	0.0252	0.9196	218792
genus.Ruminiclostridium6.id.11356	rs2548459	19	49209339	0.00152503	20.4285	C	T	0.0554866	0.0122755	6.4e-06	13377	C	T	0.0317	0.0161	0.0488495	218792
genus.Ruminiclostridium6.id.11356	rs35362464	4	36478011	0.00142241	18.9536	C	A	0.0720077	0.0165387	8.99e-06	13308	C	A	-0.0283	0.0229	0.2161	218792
genus.Ruminiclostridium6.id.11356	rs61060922	16	72136154	0.00271506	24.3741	T	G	0.15913	0.0322283	1.09e-06	8955	T	G	-0.0525	0.0443	0.2364	218792
genus.Ruminiclostridium6.id.11356	rs663262	11	86179076	0.00239041	18.8672	T	C	-0.13498	0.0310715	3.39e-06	7876	T	C	0.0266	0.0443	0.5477	218792
genus.Ruminiclostridium6.id.11356	rs67479537	19	10115515	0.00173495	20.1795	T	C	0.118994	0.026487	9.3e-06	11613	T	C	-0.0181	0.0376	0.6296	218792
genus.Ruminiclostridium6.id.11356	rs71414120	14	56938952	0.0043695	24.423	T	G	0.200894	0.0406434	1.08e-06	5567	T	G	-0.0833	0.0362	0.0214398	218792
genus.Ruminiclostridium6.id.11356	rs72991535	18	76018244	0.00218409	21.1007	T	G	0.135604	0.0295174	4.95e-06	9642	T	G	-0.0259	0.0433	0.5499	218792
genus.Ruminiclostridium6.id.11356	rs73176030	7	101271282	0.0014725	19.7252	T	C	0.058665	0.013208	7.29e-06	13378	T	C	-0.0189	0.0178	0.2885	218792
genus.Ruminiclostridium6.id.11356	rs77193512	11	40289063	0.00172531	23.1211	A	G	0.0736533	0.0153163	1.3e-06	13380	A	G	-0.0068	0.0184	0.7118	218792
genus.Ruminiclostridium6.id.11356	rs792058	2	5548605	0.00150757	19.5238	G	A	0.0554234	0.0125423	8.58e-06	12933	G	A	0.0056	0.0161	0.730099	218792
genus.Ruminiclostridium6.id.11356	rs79968172	1	240503826	0.00177991	22.8235	G	A	0.11614	0.0243083	1.66e-06	12802	G	A	0.0187	0.0336	0.5779	218792
genus.Ruminiclostridium6.id.11356	rs9555756	13	111703249	0.00154688	20.7092	A	C	-0.0804138	0.0176692	7.1e-06	13369	A	C	0.0367	0.0284	0.197	218792
genus.Ruminiclostridium9.id.11357	rs113048721	9	74214419	0.00122359	20.4799	C	G	0.0600735	0.0132737	4.1e-06	16719	C	G	-0.001	0.0224	0.9653	218792
genus.Ruminiclostridium9.id.11357	rs12040548	1	247710624	0.00129806	21.7304	G	T	0.0570422	0.0122359	3.15e-06	16721	G	T	0.0141	0.0178	0.4284	218792
genus.Ruminiclostridium9.id.11357	rs12419854	11	68886460	0.00136396	21.8873	T	A	-0.0727975	0.0155594	3.18e-06	16027	T	A	0.0302	0.0179	0.0921892	218792
genus.Ruminiclostridium9.id.11357	rs13033315	2	204706865	0.00125712	21.0481	T	A	0.0511195	0.0111418	5.68e-06	16724	T	A	-0.0164	0.017	0.3356	218792
genus.Ruminiclostridium9.id.11357	rs57665991	3	157841287	0.00161487	27.0491	C	G	-0.0641507	0.0123339	2.07e-07	16725	C	G	-0.0401	0.0185	0.0300601	218792
genus.Ruminiclostridium9.id.11357	rs6082461	20	2210530	0.00120204	20.0357	A	C	0.0586425	0.0131004	4.87e-06	16650	A	C	-0.0279	0.0196	0.1563	218792
genus.Ruminiclostridium9.id.11357	rs7137760	12	10702414	0.00122464	20.501	C	T	0.050797	0.0112182	7.07e-06	16722	C	T	-0.0094	0.0159	0.557	218792
genus.Ruminiclostridium9.id.11357	rs73592673	6	128568828	0.00149448	23.1856	A	T	-0.081629	0.0169515	2.14e-06	15493	A	T	0.0382	0.0238	0.1078	218792
genus.Ruminiclostridium9.id.11357	rs74303178	8	14697544	0.00119276	19.9477	T	C	0.0532742	0.0119274	7.92e-06	16706	T	C	-0.0216	0.0171	0.205	218792
genus.Ruminiclostridium9.id.11357	rs78191726	6	67655320	0.00125848	20.2077	T	C	0.0944998	0.0210206	7.58e-06	16039	T	C	0.0578	0.0306	0.0587097	218792
genus.Ruminiclostridium9.id.11357	rs79082720	7	155701010	0.00127484	20.5409	C	G	0.0928576	0.0204871	6.47e-06	16094	C	G	0.0591	0.0373	0.1133	218792
genus.Ruminiclostridium9.id.11357	rs918449	19	34371198	0.00138866	23.2548	A	G	-0.0950908	0.0197177	2.56e-06	16725	A	G	-0.0206	0.0309	0.5052	218792
genus.Ruminiclostridium9.id.11357	rs9522712	13	90441578	0.00121798	20.3932	T	C	0.0699728	0.0154939	4.66e-06	16725	T	C	-0.0307	0.0223	0.169	218792
genus.Ruminiclostridium9.id.11357	rs9809789	3	29179983	0.00125828	20.1869	C	T	-0.0717454	0.0159673	8.72e-06	16025	C	T	-0.0112	0.0207	0.5867	218792
genus.RuminococcaceaeNK4A214group.id.11358	rs11241747	5	123846318	0.00133276	19.7779	C	T	0.0533858	0.0120035	6.59e-06	14822	C	T	0.0028	0.0175	0.8707	218792
genus.RuminococcaceaeNK4A214group.id.11358	rs114244418	2	235430299	0.00309374	22.0989	C	G	-0.175266	0.0372779	3.59e-06	7123	C	G	-0.0254	0.0405	0.531401	218792
genus.RuminococcaceaeNK4A214group.id.11358	rs11586410	1	157338888	0.00173864	25.8114	G	A	-0.0863422	0.0169937	3.66e-07	14822	G	A	0.0143	0.022	0.5145	218792
genus.RuminococcaceaeNK4A214group.id.11358	rs12642039	4	159932022	0.00140232	21.449	T	C	-0.0553003	0.0119397	3.43e-06	15276	T	C	0.0039	0.0165	0.8115	218792
genus.RuminococcaceaeNK4A214group.id.11358	rs12731	2	239087912	0.00137405	21.0326	A	G	-0.0527684	0.0115053	4.87e-06	15288	A	G	0.0287	0.0163	0.0790096	218792
genus.RuminococcaceaeNK4A214group.id.11358	rs13087692	3	84725039	0.00135988	20.8154	T	G	0.0574623	0.012594	8.69e-06	15288	T	G	-0.008	0.0173	0.6428	218792
genus.RuminococcaceaeNK4A214group.id.11358	rs136761	22	49796014	0.00163759	24.3089	G	A	-0.0587521	0.0119155	8.15e-07	14822	G	A	0.0085	0.0165	0.6062	218792
genus.RuminococcaceaeNK4A214group.id.11358	rs147475196	3	26509287	0.00206637	20.5305	A	G	-0.133769	0.0295196	4.72e-06	9917	A	G	0.0072	0.0259	0.782699	218792
genus.RuminococcaceaeNK4A214group.id.11358	rs34576931	12	78373555	0.00136621	20.0779	G	C	-0.0873312	0.0194886	4.72e-06	14678	G	C	-0.0182	0.0313	0.5612	218792
genus.RuminococcaceaeNK4A214group.id.11358	rs35559912	5	35288938	0.00147386	20.6261	T	C	-0.0925071	0.0203674	4.89e-06	13976	T	C	0.0316	0.0244	0.1967	218792
genus.RuminococcaceaeNK4A214group.id.11358	rs4814689	20	18030357	0.00157052	22.0329	C	T	-0.1083	0.0230708	4.55e-06	14009	C	T	0.031	0.0383	0.4188	218792
genus.RuminococcaceaeNK4A214group.id.11358	rs5994253	22	17793012	0.00172996	26.4899	A	G	-0.0811302	0.0157621	2.35e-07	15288	A	G	0.0184	0.0228	0.4195	218792
genus.RuminococcaceaeNK4A214group.id.11358	rs62027366	16	24073806	0.0013474	19.9954	T	C	0.0615389	0.0137612	6.58e-06	14822	T	C	-0.0157	0.0198	0.4302	218792
genus.RuminococcaceaeNK4A214group.id.11358	rs6681678	1	100248591	0.00133515	17.4189	C	T	-0.100174	0.024	9.05e-06	13031	C	T	-0.0125	0.0442	0.7772	218792
genus.RuminococcaceaeNK4A214group.id.11358	rs73158814	7	132042135	0.00176126	23.0691	C	G	-0.109257	0.0227458	2.2e-06	13077	C	G	-0.0156	0.0427	0.715599	218792
genus.RuminococcaceaeNK4A214group.id.11358	rs7573569	2	141897042	0.0014326	21.2616	T	C	0.107739	0.0233638	3.23e-06	14822	T	C	0.0053	0.0329	0.8717	218792
genus.RuminococcaceaeUCG002.id.11360	rs10916131	1	227563126	0.00130382	22.3179	C	T	-0.069333	0.0146753	2.87e-06	17097	C	T	-0.0275	0.0216	0.2026	218792
genus.RuminococcaceaeUCG002.id.11360	rs10927423	1	14732458	0.00136336	23.3371	C	A	-0.0713617	0.0147712	8.5e-07	17096	C	A	0.0023	0.0207	0.9104	218792
genus.RuminococcaceaeUCG002.id.11360	rs10964441	9	20131746	0.00348252	18.6756	G	A	-0.14906	0.034486	7.45e-06	5346	G	A	-0.0101	0.0261	0.6999	218792
genus.RuminococcaceaeUCG002.id.11360	rs113147300	9	114066670	0.00129583	21.2377	A	G	-0.075842	0.0164562	7.69e-06	16370	A	G	-0.0209	0.0231	0.3659	218792
genus.RuminococcaceaeUCG002.id.11360	rs11607472	11	43344751	0.00120112	19.5778	A	G	-0.0780229	0.0176325	7.19e-06	16282	A	G	0.0218	0.0315	0.4884	218792
genus.RuminococcaceaeUCG002.id.11360	rs116974815	11	111712942	0.00391823	22.882	C	A	-0.189731	0.0396566	2.03e-06	5819	C	A	0.0293	0.0318	0.3564	218792
genus.RuminococcaceaeUCG002.id.11360	rs11750293	5	123822114	0.00134531	23.0249	G	T	-0.0578304	0.0120512	1.76e-06	17094	G	T	-0.0158	0.0165	0.3385	218792
genus.RuminococcaceaeUCG002.id.11360	rs12463378	19	54475808	0.00127493	21.6912	A	G	-0.0522061	0.0112086	2.96e-06	16994	A	G	0.0155	0.0173	0.3713	218792
genus.RuminococcaceaeUCG002.id.11360	rs15256	10	73820548	0.00110597	18.9253	C	T	0.0732376	0.016834	9.46e-06	17095	C	T	-0.0332	0.0246	0.1765	218792
genus.RuminococcaceaeUCG002.id.11360	rs2265670	1	190171640	0.00128421	21.9805	C	G	-0.0512404	0.0109287	2.99e-06	17096	C	G	-0.02	0.0159	0.2084	218792
genus.RuminococcaceaeUCG002.id.11360	rs362417	14	73589896	0.00120133	20.5614	G	C	-0.054863	0.0120984	7.8e-06	17097	G	C	-0.0206	0.0194	0.289	218792
genus.RuminococcaceaeUCG002.id.11360	rs55793120	12	47384118	0.00214802	25.1148	T	C	0.137396	0.027414	4.81e-07	11669	T	C	-0.0793	0.0335	0.0178698	218792
genus.RuminococcaceaeUCG002.id.11360	rs56030423	15	90806029	0.00137988	20.637	G	A	-0.0982874	0.0216344	6.3e-06	14937	G	A	-0.0208	0.031	0.5027	218792
genus.RuminococcaceaeUCG002.id.11360	rs57079348	13	87920450	0.00119769	19.6296	T	G	-0.076573	0.017282	7.22e-06	16372	T	G	-0.0126	0.0341	0.7123	218792
genus.RuminococcaceaeUCG002.id.11360	rs6542556	2	120757853	0.00116702	19.97	A	G	0.050974	0.011406	7.86e-06	17094	A	G	0.004	0.0164	0.8045	218792
genus.RuminococcaceaeUCG002.id.11360	rs67746927	4	12207874	0.00144851	24.1512	C	G	-0.054237	0.0110357	9.17e-07	16651	C	G	0.0159	0.0161	0.3245	218792
genus.RuminococcaceaeUCG002.id.11360	rs6793778	3	24045453	0.00116254	19.8932	C	T	-0.0558706	0.0125258	9.81e-06	17094	C	T	0.0391	0.018	0.0301398	218792
genus.RuminococcaceaeUCG002.id.11360	rs7120052	11	86335459	0.00124162	21.252	A	C	0.0624796	0.0135523	1.97e-06	17097	A	C	0.0007	0.0202	0.9705	218792
genus.RuminococcaceaeUCG002.id.11360	rs7155595	14	77502546	0.00138733	23.7312	C	A	0.0569929	0.0116986	1.15e-06	17084	C	A	-0.0176	0.0173	0.3089	218792
genus.RuminococcaceaeUCG002.id.11360	rs7249614	19	43637890	0.00118635	19.7751	A	G	-0.0492778	0.0110807	9.07e-06	16651	A	G	0.0198	0.0163	0.2257	218792
genus.RuminococcaceaeUCG002.id.11360	rs72874194	2	45178830	0.00127228	21.2092	G	C	-0.0770289	0.016725	3.47e-06	16651	G	C	-0.0407	0.0232	0.0791608	218792
genus.RuminococcaceaeUCG002.id.11360	rs7342369	12	129452119	0.00124129	20.6919	C	A	-0.0527803	0.0116023	5.66e-06	16651	C	A	0.0132	0.0183	0.4712	218792
genus.RuminococcaceaeUCG002.id.11360	rs76847269	5	141014951	0.00274617	21.0716	A	G	0.163508	0.0356151	5.17e-06	7654	A	G	0.0166	0.0502	0.7411	218792
genus.RuminococcaceaeUCG002.id.11360	rs77564310	15	80713184	0.00150537	25.6268	A	C	-0.0713093	0.0140855	3.29e-07	17000	A	C	0.0109	0.0196	0.5782	218792
genus.RuminococcaceaeUCG002.id.11360	rs79016051	1	238947387	0.00129511	21.9612	C	T	-0.0887747	0.0189424	2.34e-06	16937	C	T	-0.0041	0.0236	0.863	218792
genus.RuminococcaceaeUCG002.id.11360	rs882348	4	23325040	0.00117177	20.0549	A	G	-0.0799946	0.0178618	5.45e-06	17097	A	G	0.0429	0.0246	0.0808705	218792
genus.RuminococcaceaeUCG003.id.11361	rs10490280	2	37905976	0.00156811	21.9912	C	T	-0.0672094	0.0143309	4.16e-06	14004	C	T	0.0048	0.0203	0.8119	218792
genus.RuminococcaceaeUCG003.id.11361	rs11243416	9	134416970	0.00167081	23.4339	T	C	-0.0925653	0.0191203	1.67e-06	14004	T	C	0.0551	0.0313	0.0785507	218792
genus.RuminococcaceaeUCG003.id.11361	rs11613919	12	75496463	0.00152353	21.8304	G	T	0.0727604	0.0155716	1.63e-06	14309	G	T	-0.0238	0.0191	0.2139	218792
genus.RuminococcaceaeUCG003.id.11361	rs139730	22	25292719	0.0013941	19.5475	G	C	-0.0577655	0.0130645	9.72e-06	14004	G	C	-0.0094	0.0185	0.611499	218792
genus.RuminococcaceaeUCG003.id.11361	rs16959793	15	35071718	0.00157207	22.6892	A	C	-0.062527	0.0131259	2.22e-06	14412	A	C	0.0014	0.0161	0.9315	218792
genus.RuminococcaceaeUCG003.id.11361	rs2523124	7	97348436	0.00141849	20.4652	T	C	-0.0546625	0.0120823	5.78e-06	14409	T	C	0.0003	0.0162	0.9847	218792
genus.RuminococcaceaeUCG003.id.11361	rs3013089	1	13794594	0.00145529	20.9955	G	A	-0.0551473	0.0120346	4.38e-06	14408	G	A	0.0191	0.0164	0.2457	218792
genus.RuminococcaceaeUCG003.id.11361	rs4452755	8	82026852	0.00153675	22.1694	A	C	-0.0634463	0.0134741	3.29e-06	14406	A	C	0.042	0.0168	0.0123299	218792
genus.RuminococcaceaeUCG003.id.11361	rs4532474	6	105781538	0.00141119	20.3639	G	A	0.0769231	0.017045	4.82e-06	14412	G	A	-0.0342	0.0214	0.1102	218792
genus.RuminococcaceaeUCG003.id.11361	rs4629039	18	46485154	0.00141291	20.3776	T	A	0.0553742	0.0122659	6.54e-06	14404	T	A	0.008	0.0163	0.6244	218792
genus.RuminococcaceaeUCG003.id.11361	rs646327	19	49209851	0.00170241	24.5633	G	A	0.0586696	0.011837	7.83e-07	14406	G	A	0.0312	0.0161	0.0526805	218792
genus.RuminococcaceaeUCG003.id.11361	rs6759615	2	205238716	0.00181653	26.2202	A	G	0.102523	0.0200204	7.86e-07	14410	A	G	0.0454	0.0266	0.0880603	218792
genus.RuminococcaceaeUCG003.id.11361	rs73341549	7	51541468	0.00419253	28.3851	T	C	-0.169857	0.0318768	1.51e-07	6744	T	C	-0.02	0.0341	0.5576	218792
genus.RuminococcaceaeUCG003.id.11361	rs78720113	3	41982393	0.00163035	21.3533	A	G	-0.115348	0.0249601	7.59e-06	13078	A	G	0.0201	0.0296	0.4974	218792
genus.RuminococcaceaeUCG004.id.11362	rs10976229	9	7317307	0.00219026	20.0059	T	G	0.095976	0.0214554	7.04e-06	9116	T	G	0.0331	0.0236	0.1616	218792
genus.RuminococcaceaeUCG004.id.11362	rs11961899	6	132887921	0.00202068	19.2333	G	A	-0.0707825	0.0161381	9.18e-06	9501	G	A	-0.0001	0.0177	0.9953	218792
genus.RuminococcaceaeUCG004.id.11362	rs12125734	1	103732214	0.00302133	27.0804	G	T	0.133972	0.0257417	2.09e-07	8938	G	T	-0.0161	0.0274	0.5573	218792
genus.RuminococcaceaeUCG004.id.11362	rs2248146	7	24791998	0.00211452	20.1306	T	C	0.0689452	0.0153649	8.2e-06	9502	T	C	-0.0234	0.0167	0.1599	218792
genus.RuminococcaceaeUCG004.id.11362	rs3800154	6	2119329	0.00214066	20.1739	A	C	-0.0797959	0.0177639	6.12e-06	9406	A	C	0.0038	0.0181	0.833	218792
genus.RuminococcaceaeUCG004.id.11362	rs511258	3	169966722	0.00228269	21.7306	G	A	-0.0757474	0.0162475	4.52e-06	9500	G	A	0.0024	0.0203	0.907	218792
genus.RuminococcaceaeUCG004.id.11362	rs550351	1	18676399	0.0020022	19.051	A	C	0.078587	0.018003	9.43e-06	9498	A	C	-0.0183	0.016	0.2522	218792
genus.RuminococcaceaeUCG004.id.11362	rs6769553	3	54427795	0.00305624	29.1202	A	G	0.0849743	0.0157451	7.91e-08	9501	A	G	-0.0186	0.018	0.3026	218792
genus.RuminococcaceaeUCG004.id.11362	rs7123615	11	15771251	0.0020126	19.1582	C	G	-0.0786157	0.0179592	7.09e-06	9502	C	G	0.008	0.0199	0.6886	218792
genus.RuminococcaceaeUCG004.id.11362	rs7569771	2	239846337	0.00208666	19.8647	A	G	-0.075914	0.0170308	8.12e-06	9502	A	G	-0.0215	0.0184	0.2428	218792
genus.RuminococcaceaeUCG004.id.11362	rs872501	8	139253064	0.00235855	20.0265	G	A	0.116125	0.025946	5.81e-06	8473	G	A	-0.0058	0.03	0.8471	218792
genus.RuminococcaceaeUCG004.id.11362	rs9818949	3	197683751	0.00227362	20.769	G	T	0.0859927	0.0188671	5.39e-06	9116	G	T	-0.0036	0.02	0.8566	218792
genus.RuminococcaceaeUCG005.id.11363	rs10873449	14	94630731	0.00128345	20.685	T	C	0.0654843	0.0143973	4.11e-06	16098	T	C	0.0097	0.0201	0.6298	218792
genus.RuminococcaceaeUCG005.id.11363	rs10937802	4	7302344	0.00127424	20.1829	G	A	0.0755811	0.0168226	8.17e-06	15821	G	A	0.02	0.0244	0.4122	218792
genus.RuminococcaceaeUCG005.id.11363	rs10950694	7	18026604	0.00161672	25.6164	T	C	0.0577628	0.011412	4.3e-07	15821	T	C	0.0177	0.0165	0.2842	218792
genus.RuminococcaceaeUCG005.id.11363	rs114279581	2	198122357	0.00253568	21.514	A	G	-0.146604	0.0316034	3.22e-06	8465	A	G	-0.0086	0.0299	0.7741	218792
genus.RuminococcaceaeUCG005.id.11363	rs12288512	11	27747671	0.0013752	21.305	A	G	0.066635	0.0144356	3.1e-06	15473	A	G	0.0318	0.0186	0.0869301	218792
genus.RuminococcaceaeUCG005.id.11363	rs12458218	18	22575871	0.00136243	21.9609	T	C	0.0677322	0.0144525	2.41e-06	16099	T	C	0.0044	0.0206	0.8295	218792
genus.RuminococcaceaeUCG005.id.11363	rs2893871	10	62662781	0.00139128	22.4322	G	A	-0.073644	0.015548	3.54e-06	16103	G	A	0.0034	0.0254	0.8934	218792
genus.RuminococcaceaeUCG005.id.11363	rs34781347	20	16312851	0.00391708	23.8269	G	A	0.188685	0.0386484	6.05e-07	6061	G	A	-0.0557	0.0309	0.0716094	218792
genus.RuminococcaceaeUCG005.id.11363	rs35166120	8	3099727	0.00136595	22.0082	C	G	-0.0686153	0.0146252	3.75e-06	16092	C	G	-0.0023	0.0192	0.9057	218792
genus.RuminococcaceaeUCG005.id.11363	rs394449	17	7034575	0.00137844	21.7072	A	T	0.0692909	0.0148712	2.6e-06	15728	A	T	0.003	0.0236	0.8973	218792
genus.RuminococcaceaeUCG005.id.11363	rs55793120	12	47384118	0.00168154	18.9021	T	C	0.121548	0.0279546	7.37e-06	11224	T	C	-0.0793	0.0335	0.0178698	218792
genus.RuminococcaceaeUCG005.id.11363	rs60081663	5	32755085	0.00261223	24.4621	C	G	0.158082	0.0319586	9.28e-07	9342	C	G	0.0425	0.0451	0.3454	218792
genus.RuminococcaceaeUCG005.id.11363	rs72776570	10	4240906	0.00126646	19.4953	C	A	0.087067	0.0197179	5.36e-06	15376	C	A	0.0196	0.0268	0.4643	218792
genus.RuminococcaceaeUCG005.id.11363	rs7449320	5	154003091	0.0013013	20.9691	C	A	0.0599163	0.0130836	4.81e-06	16095	C	A	-0.0055	0.0188	0.7689	218792
genus.RuminococcaceaeUCG005.id.11363	rs7555878	1	187906034	0.00136031	21.928	A	G	0.0586677	0.0125277	2.81e-06	16100	A	G	-0.0008	0.0184	0.9661	218792
genus.RuminococcaceaeUCG005.id.11363	rs7586445	2	239509030	0.00130019	19.6545	G	A	0.0782349	0.0176458	8.81e-06	15099	G	A	-0.0457	0.0237	0.0538295	218792
genus.RuminococcaceaeUCG005.id.11363	rs898577	15	68705697	0.00183959	18.4095	T	C	-0.123012	0.0286671	7.46e-06	9991	T	C	0.013	0.0345	0.7071	218792
genus.RuminococcaceaeUCG009.id.11366	rs113006825	6	51803869	0.00277483	19.9314	T	C	-0.0928893	0.0208035	7.98e-06	7165	T	C	0.0445	0.0194	0.0220399	218792
genus.RuminococcaceaeUCG009.id.11366	rs12508214	4	7426937	0.00279157	21.0206	C	T	-0.0774649	0.0168937	4.75e-06	7511	C	T	0.0311	0.0169	0.0661698	218792
genus.RuminococcaceaeUCG009.id.11366	rs138460696	2	66396776	0.0028253	19.4449	A	G	0.139274	0.0315794	9.81e-06	6865	A	G	-0.0181	0.0302	0.5489	218792
genus.RuminococcaceaeUCG009.id.11366	rs1550196	17	32786955	0.00335168	24.8421	G	A	0.130842	0.0262478	1.13e-06	7389	G	A	-0.049	0.0265	0.0645996	218792
genus.RuminococcaceaeUCG009.id.11366	rs2058609	12	12970792	0.00289928	21.8311	A	G	0.0816464	0.017472	3.12e-06	7510	A	G	0.0027	0.0177	0.8773	218792
genus.RuminococcaceaeUCG009.id.11366	rs2192926	2	75512668	0.00282655	21.2847	A	G	-0.089048	0.0192989	4.88e-06	7511	A	G	-0.0029	0.0169	0.8636	218792
genus.RuminococcaceaeUCG009.id.11366	rs4079028	1	202299085	0.0028121	21.0882	C	T	0.0915623	0.019936	3.28e-06	7480	C	T	-0.0074	0.0185	0.6896	218792
genus.RuminococcaceaeUCG009.id.11366	rs4708333	6	78106701	0.003069	23.1161	T	G	-0.084033	0.0174757	1.56e-06	7511	T	G	-0.0077	0.0168	0.6479	218792
genus.RuminococcaceaeUCG009.id.11366	rs61779334	1	39983022	0.00324778	22.3622	G	C	-0.138137	0.0292072	1.94e-06	6865	G	C	-0.0265	0.0268	0.3229	218792
genus.RuminococcaceaeUCG009.id.11366	rs6952765	7	32001710	0.00255892	19.2643	G	A	0.0732099	0.0166777	8.13e-06	7511	G	A	-0.0218	0.017	0.2005	218792
genus.RuminococcaceaeUCG009.id.11366	rs758191	16	1979831	0.00380599	22.2622	T	G	0.17702	0.0375113	9.01e-06	5829	T	G	0.0406	0.0267	0.1293	218792
genus.RuminococcaceaeUCG009.id.11366	rs78410648	19	52399401	0.00252813	19.0293	A	G	0.120989	0.0277317	9.67e-06	7510	A	G	0.0016	0.0255	0.9497	218792
genus.RuminococcaceaeUCG009.id.11366	rs8009993	14	39306809	0.00415387	30.8126	G	C	-0.135936	0.0244857	4.42e-08	7389	G	C	0.0046	0.0222	0.8352	218792
genus.RuminococcaceaeUCG009.id.11366	rs9558661	13	106650093	0.00266721	19.9988	T	C	-0.0897823	0.0200739	7.01e-06	7480	T	C	0.0068	0.0198	0.7327	218792
genus.RuminococcaceaeUCG010.id.11367	rs12597105	16	5233941	0.00173513	21.5756	G	A	0.0670855	0.0144415	4.87e-06	12415	G	A	0.0124	0.0202	0.5414	218792
genus.RuminococcaceaeUCG010.id.11367	rs2820282	6	104728618	0.00171698	22.1235	A	C	-0.0592304	0.0125917	2.85e-06	12865	A	C	0.0003	0.0163	0.9833	218792
genus.RuminococcaceaeUCG010.id.11367	rs35506912	15	36607072	0.0017163	21.9909	G	C	-0.0693743	0.0147926	3.21e-06	12793	G	C	0.0427	0.0197	0.03039	218792
genus.RuminococcaceaeUCG010.id.11367	rs682403	9	135968557	0.00172716	22.2531	A	G	-0.0588161	0.0124671	2.37e-06	12864	A	G	0.031	0.0159	0.0501695	218792
genus.RuminococcaceaeUCG010.id.11367	rs6958419	7	16349864	0.00170326	21.955	C	T	-0.0585718	0.0124994	2.84e-06	12870	C	T	-0.0029	0.0159	0.8551	218792
genus.RuminococcaceaeUCG010.id.11367	rs73218807	4	31057482	0.00303018	20.4004	G	A	-0.166211	0.0367938	6.43e-06	6714	G	A	0.0033	0.029	0.9082	218792
genus.RuminococcaceaeUCG010.id.11367	rs7441445	4	40707798	0.00157447	20.2639	C	T	-0.05695	0.0126502	6.8e-06	12852	C	T	0.008	0.0159	0.6176	218792
genus.RuminococcaceaeUCG010.id.11367	rs7935775	11	130676996	0.00162552	20.9415	A	T	-0.0631351	0.0137953	4.99e-06	12864	A	T	0.0046	0.0181	0.7988	218792
genus.RuminococcaceaeUCG011.id.11368	rs10274562	7	11222521	0.00563177	20.5591	C	T	0.110917	0.0244556	6.5e-06	3632	C	T	0.0047	0.0163	0.7727	218792
genus.RuminococcaceaeUCG011.id.11368	rs12636310	3	185469491	0.00606054	22.1339	G	A	0.132725	0.0282037	2.81e-06	3632	G	A	0.0183	0.0183	0.317	218792
genus.RuminococcaceaeUCG011.id.11368	rs12724320	1	179370499	0.00643526	23.5113	C	T	-0.120881	0.0249229	1.52e-06	3632	C	T	0.0059	0.0163	0.7151	218792
genus.RuminococcaceaeUCG011.id.11368	rs1416041	6	105073676	0.00786121	28.7623	A	C	-0.182339	0.0339898	7.04e-08	3632	A	C	-0.0005	0.0196	0.9798	218792
genus.RuminococcaceaeUCG011.id.11368	rs2729556	7	111763988	0.00596442	21.7808	C	T	-0.109097	0.0233699	3.19e-06	3632	C	T	0.0032	0.0159	0.8416	218792
genus.RuminococcaceaeUCG011.id.11368	rs4490371	3	76205107	0.00555667	20.1605	T	C	-0.111816	0.0248963	7.75e-06	3610	T	C	0.0031	0.0162	0.8501	218792
genus.RuminococcaceaeUCG011.id.11368	rs79113084	12	29634919	0.00632166	22.9536	C	T	-0.152166	0.0317519	2.06e-06	3610	C	T	-0.0058	0.026	0.8238	218792
genus.RuminococcaceaeUCG011.id.11368	rs9729514	1	219901055	0.00601059	21.9504	A	G	0.184934	0.0394616	2.37e-06	3632	A	G	0.0248	0.0273	0.3633	218792
genus.RuminococcaceaeUCG013.id.11370	rs11581881	1	9361576	0.00132501	20.8674	C	T	0.0661211	0.0144736	4.73e-06	15730	C	T	0.0285	0.0189	0.1328	218792
genus.RuminococcaceaeUCG013.id.11370	rs12189346	5	141395140	0.0013423	22.1347	G	A	0.0684961	0.014558	1.68e-06	16470	G	A	-0.0328	0.0204	0.1069	218792
genus.RuminococcaceaeUCG013.id.11370	rs12336782	9	13609119	0.00121767	20.4452	T	C	-0.0856047	0.0189311	8.6e-06	16772	T	C	-0.0098	0.0298	0.7418	218792
genus.RuminococcaceaeUCG013.id.11370	rs12485353	3	197049996	0.00128536	21.5819	G	A	-0.0607903	0.0130847	4.19e-06	16771	G	A	-0.0075	0.0184	0.6832	218792
genus.RuminococcaceaeUCG013.id.11370	rs12781711	10	2219930	0.00185645	31.1906	C	T	-0.0656129	0.0117477	2.55e-08	16772	C	T	0.0058	0.0183	0.752101	218792
genus.RuminococcaceaeUCG013.id.11370	rs16918863	10	19780463	0.00170177	21.5488	A	C	0.111491	0.0240157	4.16e-06	12643	A	C	-0.0082	0.0327	0.801	218792
genus.RuminococcaceaeUCG013.id.11370	rs1729063	16	10863459	0.0011833	19.5097	G	C	-0.0533411	0.0120757	9.64e-06	16470	G	C	-0.0008	0.0167	0.9628	218792
genus.RuminococcaceaeUCG013.id.11370	rs2428106	9	136620584	0.00118825	19.9458	C	G	-0.0490863	0.0109903	8.38e-06	16768	C	G	-0.0424	0.0161	0.00836103	218792
genus.RuminococcaceaeUCG013.id.11370	rs2730183	8	40311885	0.00117739	19.7681	G	A	-0.0488692	0.0109907	8.44e-06	16772	G	A	-0.0134	0.0162	0.4069	218792
genus.RuminococcaceaeUCG013.id.11370	rs4385846	10	115650278	0.00122743	20.6092	G	T	0.0598405	0.0131807	6.46e-06	16772	G	T	-0.0227	0.0202	0.2611	218792
genus.RuminococcaceaeUCG013.id.11370	rs75088940	12	30245557	0.00140946	22.0694	T	C	-0.0942968	0.0200712	2.55e-06	15638	T	C	0.0353	0.0312	0.258	218792
genus.RuminococcaceaeUCG013.id.11370	rs76973485	3	9534657	0.00408501	21.7271	G	T	0.194976	0.0418213	3.35e-06	5299	G	T	-0.0323	0.0404	0.4231	218792
genus.RuminococcaceaeUCG013.id.11370	rs7784330	7	32533950	0.00117771	19.7712	G	A	-0.0498329	0.0112066	8.16e-06	16770	G	A	0.0292	0.0165	0.0774801	218792
genus.RuminococcaceaeUCG013.id.11370	rs9313055	5	3628882	0.00127275	20.0866	T	C	0.105087	0.023446	9.55e-06	15764	T	C	-0.0271	0.029	0.3512	218792
genus.RuminococcaceaeUCG013.id.11370	rs9565219	13	76583319	0.00118299	19.8622	T	A	-0.0524592	0.0117701	8.73e-06	16772	T	A	0.0019	0.0161	0.9065	218792
genus.RuminococcaceaeUCG014.id.11371	rs10495392	1	237422989	0.00139473	19.4139	C	T	-0.082486	0.0187194	9.96e-06	13902	C	T	-0.0057	0.0304	0.8513	218792
genus.RuminococcaceaeUCG014.id.11371	rs10791168	11	131659000	0.00135996	19.6115	A	G	-0.0664624	0.0150069	9.76e-06	14403	A	G	0.0191	0.0206	0.3542	218792
genus.RuminococcaceaeUCG014.id.11371	rs10941294	5	36435597	0.00174374	22.0322	C	T	-0.122057	0.0260017	2.4e-06	12615	C	T	0.0096	0.035	0.784099	218792
genus.RuminococcaceaeUCG014.id.11371	rs115777838	5	26110626	0.00416492	23.7222	T	C	-0.18835	0.0386643	4.62e-07	5674	T	C	-0.0056	0.0252	0.8228	218792
genus.RuminococcaceaeUCG014.id.11371	rs12638134	3	101334609	0.00164293	23.6987	T	G	0.0582548	0.0119657	1.21e-06	14403	T	G	-0.0173	0.016	0.2811	218792
genus.RuminococcaceaeUCG014.id.11371	rs17296933	19	49175964	0.0015226	20.0909	C	G	-0.0829544	0.0185058	7.34e-06	13177	C	G	0.0098	0.0251	0.696299	218792
genus.RuminococcaceaeUCG014.id.11371	rs34402072	8	3636548	0.00139968	19.4282	C	T	-0.0688023	0.0156083	9.8e-06	13863	C	T	-0.035	0.0225	0.1203	218792
genus.RuminococcaceaeUCG014.id.11371	rs439810	2	119467367	0.00143906	20.7538	G	C	-0.0577127	0.0126675	7.04e-06	14403	G	C	-0.0139	0.0168	0.4087	218792
genus.RuminococcaceaeUCG014.id.11371	rs56105232	9	14363769	0.00235335	21.6736	G	A	0.139276	0.0299132	2.91e-06	9190	G	A	-0.0494	0.0336	0.1419	218792
genus.RuminococcaceaeUCG014.id.11371	rs61898819	11	126024042	0.00133784	19.1876	A	T	0.0607865	0.0138761	9.92e-06	14325	A	T	0.0045	0.0202	0.8246	218792
genus.RuminococcaceaeUCG014.id.11371	rs62478832	7	109564034	0.0014142	20.2928	T	A	-0.058129	0.012903	6.04e-06	14331	T	A	-0.0179	0.0167	0.2846	218792
genus.RuminococcaceaeUCG014.id.11371	rs72809222	2	57205854	0.00165492	23.0747	T	C	0.0671775	0.0139838	2.41e-06	13922	T	C	-0.0348	0.0195	0.0741105	218792
genus.RuminococcaceaeUCG014.id.11371	rs73186226	3	123829361	0.00152465	21.0081	G	A	-0.0993852	0.0216819	6.72e-06	13760	G	A	0.0536	0.0307	0.0807997	218792
genus.RuminococcaceaeUCG014.id.11371	rs74060145	1	15322582	0.00159155	20.7374	C	G	-0.115767	0.0254199	8.71e-06	13011	C	G	-0.0158	0.0295	0.5923	218792
genus.RuminococcaceaeUCG014.id.11371	rs77627087	16	87784994	0.00140589	20.2565	C	G	0.067562	0.0150103	7.43e-06	14390	C	G	0.0128	0.0209	0.5403	218792
genus.RuminococcaceaeUCG014.id.11371	rs79640386	18	4084336	0.00145623	19.9649	T	A	-0.110863	0.0248098	8.74e-06	13692	T	A	0.0416	0.0235	0.0765403	218792
genus.RuminococcaceaeUCG014.id.11371	rs853612	10	119928413	0.00135794	19.5823	A	G	-0.0528257	0.0119367	9.75e-06	14403	A	G	0.0062	0.0162	0.7022	218792
genus.RuminococcaceaeUCG014.id.11371	rs995642	2	134854659	0.00156417	22.5593	C	T	0.060048	0.0126417	1.9e-06	14402	C	T	0.0302	0.0186	0.1047	218792
genus.Ruminococcus1.id.11373	rs10167839	2	181882879	0.0012001	19.9492	A	G	0.0519509	0.0116306	8.09e-06	16605	A	G	-0.0099	0.0166	0.551099	218792
genus.Ruminococcus1.id.11373	rs10769159	11	45688595	0.00203428	33.84	G	C	-0.0640277	0.0110059	5.29e-09	16603	G	C	0.0122	0.0162	0.4532	218792
genus.Ruminococcus1.id.11373	rs10995816	10	65870347	0.00114513	19.0252	C	G	-0.0762002	0.0174689	8.38e-06	16597	C	G	-0.0003	0.0251	0.9904	218792
genus.Ruminococcus1.id.11373	rs11783695	8	144596903	0.0012443	20.6861	G	T	-0.0734114	0.0161398	4.73e-06	16606	G	T	0.0445	0.0218	0.0414696	218792
genus.Ruminococcus1.id.11373	rs17781867	17	71256018	0.00154994	22.2715	C	T	0.0999271	0.0211728	1.96e-06	14349	C	T	-0.0376	0.0315	0.2319	218792
genus.Ruminococcus1.id.11373	rs3000856	1	12778598	0.00117855	19.0253	T	A	-0.0709997	0.0162766	9.28e-06	16126	T	A	-0.0125	0.0216	0.562501	218792
[truncated: 551 more rows]
