# Supplementary material for: Gut microbiota and venous thromboembolism: a two-sample Mendelian randomization study Gut microbiota and venous thromboembolism
Source: Research Square preprint supplement (doi:10.21203/rs.3.rs-3834627/v1), 2024-01-08
Supplement: Supplementary file 5 [file a9609495fcfaea2be1dbaaf8.xlsx]

## Sheet: Sheet1
Table S4 Characteristics of the genetic variants associated with 17 bacterial that have been identified to be associated with the risk of VTE among European populations
Exposure	Outcome	SNP	b	se	P-value	OR	OR_Low_CI95	OR_Up_CI95
family.Porphyromonadaceae.id.943	VTE	rs10119172	0.131557	0.282101	0.640968	1.1406	0.656153	1.98273
family.Porphyromonadaceae.id.943	VTE	rs10762312	0.318897	0.326535	0.328763	1.37561	0.725342	2.60884
family.Porphyromonadaceae.id.943	VTE	rs10858364	0.432063	0.339866	0.20363	1.54043	0.791304	2.99876
family.Porphyromonadaceae.id.943	VTE	rs17065783	0.358514	0.366969	0.32859	1.4312	0.697156	2.93813
family.Porphyromonadaceae.id.943	VTE	rs1980561	0.072122	0.32764	0.825773	1.07479	0.565496	2.04275
family.Porphyromonadaceae.id.943	VTE	rs3111851	0.823171	0.311052	0.00813514	2.27771	1.23801	4.19055
family.Porphyromonadaceae.id.943	VTE	rs35233670	0.466663	0.335744	0.164548	1.59466	0.825806	3.07935
family.Porphyromonadaceae.id.943	VTE	rs35961441	-0.142037	0.452332	0.753514	0.867589	0.357504	2.10546
family.Porphyromonadaceae.id.943	VTE	rs6953849	-0.143424	0.288241	0.618777	0.866386	0.492443	1.52429
family.Porphyromonadaceae.id.943	VTE	rs7330827	0.489205	0.323569	0.130558	1.63102	0.865031	3.07529
family.Porphyromonadaceae.id.943	VTE	rs864093	0.0549306	0.369361	0.881776	1.05647	0.512212	2.17903
phylum.Cyanobacteria.id.1500	VTE	rs12555298	0.234008	0.21656	0.279889	1.26365	0.826588	1.93182
phylum.Cyanobacteria.id.1500	VTE	rs2314810	0.146158	0.171816	0.394955	1.15738	0.826462	1.6208
phylum.Cyanobacteria.id.1500	VTE	rs2553290	0.403271	0.232816	0.0832481	1.49671	0.948334	2.3622
phylum.Cyanobacteria.id.1500	VTE	rs2585223	-0.332243	0.217305	0.126283	0.717313	0.468528	1.0982
phylum.Cyanobacteria.id.1500	VTE	rs584122	0.103444	0.2227	0.642292	1.10898	0.716735	1.7159
phylum.Cyanobacteria.id.1500	VTE	rs61972390	0.0857044	0.217987	0.6942	1.08948	0.710667	1.67023
phylum.Cyanobacteria.id.1500	VTE	rs7148504	0	0.201148	1	1	0.674185	1.48327
phylum.Cyanobacteria.id.1500	VTE	rs76531781	-0.00948817	0.1751	0.956786	0.990557	0.702799	1.39613
phylum.Cyanobacteria.id.1500	VTE	rs789068	0.221753	0.203798	0.276548	1.24826	0.837202	1.86115
phylum.Cyanobacteria.id.1500	VTE	rs9864379	0.377879	0.161228	0.019091	1.45919	1.06383	2.00148
family.Defluviitaleaceae.id.1924	DVT	rs112893842	0.000429561	0.00400936	0.914678	1.00043	0.992599	1.00832
family.Defluviitaleaceae.id.1924	DVT	rs1582238	-0.0011755	0.00388005	0.761921	0.998825	0.991258	1.00645
family.Defluviitaleaceae.id.1924	DVT	rs17051335	0.00491216	0.00427083	0.250076	1.00492	0.996547	1.01337
family.Defluviitaleaceae.id.1924	DVT	rs1908593	0.000862926	0.00417963	0.836432	1.00086	0.992698	1.0091
family.Defluviitaleaceae.id.1924	DVT	rs28696126	-0.00535104	0.00406142	0.187662	0.994663	0.986777	1.00261
family.Defluviitaleaceae.id.1924	DVT	rs4344384	-0.00437946	0.00412625	0.288523	0.99563	0.98761	1.00371
family.Defluviitaleaceae.id.1924	DVT	rs4677103	-0.00400298	0.00388312	0.302604	0.996005	0.988453	1.00361
family.Defluviitaleaceae.id.1924	DVT	rs540220	-0.00498938	0.00440927	0.257817	0.995023	0.986461	1.00366
family.Defluviitaleaceae.id.1924	DVT	rs55658617	-0.00117672	0.00303734	0.698447	0.998824	0.992895	1.00479
family.Defluviitaleaceae.id.1924	DVT	rs72731813	-0.00547725	0.00353657	0.121443	0.994538	0.987668	1.00146
family.Defluviitaleaceae.id.1924	DVT	rs9608282	-0.00332239	0.00395296	0.400638	0.996683	0.988991	1.00444
family.Defluviitaleaceae.id.1924	DVT	rs9725395	-0.00555472	0.00390903	0.155318	0.994461	0.986871	1.00211
family.Oxalobacteraceae.id.2966	DVT	rs111966731	0.0023602	0.00299152	0.430133	1.00236	0.996503	1.00826
family.Oxalobacteraceae.id.2966	DVT	rs11246212	0.00466464	0.00321562	0.146885	1.00468	0.998363	1.01103
family.Oxalobacteraceae.id.2966	DVT	rs12002250	-0.00460439	0.00322279	0.153092	0.995406	0.989138	1.00171
family.Oxalobacteraceae.id.2966	DVT	rs12509763	-0.00288094	0.00326898	0.378158	0.997123	0.990755	1.00353
family.Oxalobacteraceae.id.2966	DVT	rs1569853	0.00187275	0.00288034	0.515574	1.00187	0.996234	1.00755
family.Oxalobacteraceae.id.2966	DVT	rs17138946	-0.00631121	0.00331113	0.0566424	0.993709	0.987281	1.00018
family.Oxalobacteraceae.id.2966	DVT	rs36057338	-0.00257651	0.00315854	0.414657	0.997427	0.991271	1.00362
family.Oxalobacteraceae.id.2966	DVT	rs4428215	-0.000165829	0.00277083	0.952277	0.999834	0.994419	1.00528
family.Oxalobacteraceae.id.2966	DVT	rs561239	-0.00688322	0.00323889	0.0335717	0.99314	0.986856	0.999465
family.Oxalobacteraceae.id.2966	DVT	rs6000536	0.00196404	0.00307941	0.523605	1.00197	0.995937	1.00803
family.Oxalobacteraceae.id.2966	DVT	rs62435498	-0.00588576	0.00331079	0.0754446	0.994132	0.987701	1.0006
family.Oxalobacteraceae.id.2966	DVT	rs736744	-0.00702945	0.00281829	0.0126233	0.992995	0.987525	0.998496
family.Oxalobacteraceae.id.2966	DVT	rs7993559	-0.00321113	0.00325293	0.323569	0.996794	0.990459	1.00317
family.Oxalobacteraceae.id.2966	DVT	rs80330081	-0.00212472	0.00319814	0.506459	0.997878	0.991642	1.00415
family.Oxalobacteraceae.id.2966	DVT	rs934049	-0.000160567	0.00315064	0.959355	0.999839	0.993684	1.00603
family.Ruminococcaceae.id.2050	DVT	rs10093275	-0.00858882	0.00599155	0.151718	0.991448	0.979873	1.00316
family.Ruminococcaceae.id.2050	DVT	rs10166469	-0.00734565	0.00628598	0.242574	0.992681	0.980526	1.00499
family.Ruminococcaceae.id.2050	DVT	rs1158100	0.0041146	0.00615327	0.503697	1.00412	0.992086	1.01631
family.Ruminococcaceae.id.2050	DVT	rs1612733	-0.000795682	0.0058998	0.892718	0.999205	0.987717	1.01083
family.Ruminococcaceae.id.2050	DVT	rs17376049	0.0011495	0.00543218	0.832412	1.00115	0.990547	1.01187
family.Ruminococcaceae.id.2050	DVT	rs2113833	0.00418037	0.00427543	0.32819	1.00419	0.995809	1.01264
family.Ruminococcaceae.id.2050	DVT	rs2426816	-0.00756411	0.00607577	0.213145	0.992464	0.980716	1.00435
family.Ruminococcaceae.id.2050	DVT	rs3009418	-0.00868752	0.00587575	0.139264	0.99135	0.979999	1.00283
family.Ruminococcaceae.id.2050	DVT	rs499272	-0.00465513	0.00631437	0.460984	0.995356	0.983113	1.00775
family.Ruminococcaceae.id.2050	DVT	rs55793120	-0.00920843	0.00466114	0.0482029	0.990834	0.981823	0.999927
family.Ruminococcaceae.id.2050	DVT	rs56199908	-0.00813749	0.00317057	0.010271	0.991896	0.985751	0.998079
family.Ruminococcaceae.id.2050	DVT	rs76724913	0.00597047	0.00656541	0.363148	1.00599	0.993126	1.01902
genus..Eubacteriumrectalegroup.id.14374	DVT	rs10248854	0.00459285	0.00577924	0.426779	1.0046	0.993288	1.01605
genus..Eubacteriumrectalegroup.id.14374	DVT	rs10797540	0.00760203	0.00584094	0.193085	1.00763	0.996161	1.01923
genus..Eubacteriumrectalegroup.id.14374	DVT	rs10892089	0.00392418	0.00598304	0.511899	1.00393	0.992228	1.01577
genus..Eubacteriumrectalegroup.id.14374	DVT	rs117151453	0.00728267	0.00561922	0.194965	1.00731	0.996276	1.01846
genus..Eubacteriumrectalegroup.id.14374	DVT	rs143694765	-0.000375604	0.00569355	0.947402	0.999624	0.988531	1.01084
genus..Eubacteriumrectalegroup.id.14374	DVT	rs16960159	0.00202608	0.00424433	0.633105	1.00203	0.993727	1.0104
genus..Eubacteriumrectalegroup.id.14374	DVT	rs2884897	0.00844719	0.00536557	0.115411	1.00848	0.997933	1.01914
genus..Eubacteriumrectalegroup.id.14374	DVT	rs314726	0.00672111	0.00559432	0.22959	1.00674	0.995765	1.01784
genus..Eubacteriumrectalegroup.id.14374	DVT	rs35398954	0.000930271	0.00521639	0.858459	1.00093	0.990749	1.01122
genus..Eubacteriumrectalegroup.id.14374	DVT	rs3980709	0.00408628	0.00620146	0.509946	1.00409	0.991964	1.01637
genus..Eubacteriumrectalegroup.id.14374	DVT	rs59427698	-0.00231541	0.00591577	0.695504	0.997687	0.986186	1.00932
genus..Eubacteriumrectalegroup.id.14374	DVT	rs62547233	0.000518861	0.00601564	0.931266	1.00052	0.988792	1.01239
genus.Coprococcus2.id.11302	DVT	rs10070053	0.00577163	0.00501674	0.249949	1.00579	0.995947	1.01573
genus.Coprococcus2.id.11302	DVT	rs12634070	0.00343708	0.00486288	0.479691	1.00344	0.993924	1.01305
genus.Coprococcus2.id.11302	DVT	rs1958519	0.00381702	0.00443065	0.388961	1.00382	0.995145	1.01258
genus.Coprococcus2.id.11302	DVT	rs2482516	0.0077182	0.00481469	0.108923	1.00775	0.998283	1.0173
genus.Coprococcus2.id.11302	DVT	rs35890118	-0.000284655	0.00487873	0.953473	0.999715	0.990201	1.00932
genus.Coprococcus2.id.11302	DVT	rs59936925	0.00368388	0.00438772	0.40114	1.00369	0.995096	1.01236
genus.Coprococcus2.id.11302	DVT	rs61823518	0.00534938	0.0050538	0.289834	1.00536	0.995454	1.01537
genus.Coprococcus2.id.11302	DVT	rs6677933	0.00578956	0.00440956	0.189197	1.00581	0.997151	1.01454
genus.Coprococcus2.id.11302	DVT	rs72680320	0.000402875	0.00452195	0.929008	1.0004	0.991576	1.00931
genus.Coprococcus2.id.11302	DVT	rs9426473	0.00543401	0.0048887	0.266334	1.00545	0.995861	1.01513
genus.Erysipelatoclostridium.id.11381	DVT	rs1434153	-0.0065284	0.00464669	0.160034	0.993493	0.984486	1.00258
genus.Erysipelatoclostridium.id.11381	DVT	rs16936671	-0.0139379	0.00446641	0.00180487	0.986159	0.977564	0.99483
genus.Erysipelatoclostridium.id.11381	DVT	rs17804233	-0.00964968	0.00440231	0.0283823	0.990397	0.981888	0.998979
genus.Erysipelatoclostridium.id.11381	DVT	rs2901723	-0.00250654	0.00454069	0.580937	0.997497	0.988659	1.00641
genus.Erysipelatoclostridium.id.11381	DVT	rs340991	-0.00883045	0.00429973	0.0400024	0.991208	0.98289	0.999597
genus.Erysipelatoclostridium.id.11381	DVT	rs34528142	-0.00578602	0.00470958	0.219236	0.994231	0.985095	1.00345
genus.Erysipelatoclostridium.id.11381	DVT	rs3804326	0.00254782	0.00391925	0.515641	1.00255	0.994879	1.01028
genus.Erysipelatoclostridium.id.11381	DVT	rs45480394	-0.00208412	0.00439687	0.635499	0.997918	0.989355	1.00656
genus.Erysipelatoclostridium.id.11381	DVT	rs4697572	-0.00134373	0.00412434	0.744571	0.998657	0.990617	1.00676
genus.Erysipelatoclostridium.id.11381	DVT	rs58236560	-0.00333142	0.00436893	0.445747	0.996674	0.988176	1.00525
genus.Erysipelatoclostridium.id.11381	DVT	rs61806970	-0.00128686	0.0043634	0.768054	0.998714	0.990209	1.00729
genus.Erysipelatoclostridium.id.11381	DVT	rs622418	-0.00320139	0.00436187	0.46298	0.996804	0.988318	1.00536
genus.Erysipelatoclostridium.id.11381	DVT	rs6474512	-0.00345348	0.00441198	0.433774	0.996552	0.987972	1.00521
genus.Erysipelatoclostridium.id.11381	DVT	rs710230	0.00461485	0.00405086	0.254608	1.00463	0.996681	1.01263
genus.Erysipelatoclostridium.id.11381	DVT	rs7221249	-0.00275029	0.00349021	0.430696	0.997253	0.990455	1.0041
genus.Erysipelatoclostridium.id.11381	DVT	rs9590927	0.000509354	0.00452732	0.910422	1.00051	0.991671	1.00943
genus.LachnospiraceaeUCG001.id.11321	DVT	rs10815577	0.00878785	0.00436177	0.0439314	1.00883	1.00024	1.01749
genus.LachnospiraceaeUCG001.id.11321	DVT	rs12131224	-0.0027183	0.00434561	0.531625	0.997285	0.988827	1.00582
genus.LachnospiraceaeUCG001.id.11321	DVT	rs2050911	-0.00400211	0.00425423	0.34684	0.996006	0.987735	1.00435
genus.LachnospiraceaeUCG001.id.11321	DVT	rs2371284	0.00517394	0.00462447	0.263217	1.00519	0.996118	1.01434
genus.LachnospiraceaeUCG001.id.11321	DVT	rs437876	-0.000289255	0.00387703	0.940527	0.999711	0.992143	1.00734
genus.LachnospiraceaeUCG001.id.11321	DVT	rs4981345	0.00327906	0.00450063	0.46626	1.00328	0.994473	1.01217
genus.LachnospiraceaeUCG001.id.11321	DVT	rs573933	-0.000302881	0.00470094	0.948628	0.999697	0.990528	1.00895
genus.LachnospiraceaeUCG001.id.11321	DVT	rs62496417	0.0043396	0.00457513	0.342864	1.00435	0.995383	1.0134
genus.LachnospiraceaeUCG001.id.11321	DVT	rs7213933	0.00532031	0.00462318	0.249819	1.00533	0.996266	1.01449
genus.LachnospiraceaeUCG001.id.11321	DVT	rs7341608	0.00632193	0.0047563	0.183792	1.00634	0.997004	1.01577
genus.LachnospiraceaeUCG001.id.11321	DVT	rs74034332	0.00249355	0.00403458	0.536547	1.0025	0.9946	1.01046
genus.LachnospiraceaeUCG001.id.11321	DVT	rs78848836	0.00894623	0.00424664	0.0351469	1.00899	1.00062	1.01742
genus.LachnospiraceaeUCG001.id.11321	DVT	rs79476906	0.00384409	0.00457159	0.400424	1.00385	0.994897	1.01289
genus.LachnospiraceaeUCG001.id.11321	DVT	rs8104225	-0.00132053	0.00468309	0.777961	0.99868	0.989556	1.00789
genus.LachnospiraceaeUCG001.id.11321	DVT	rs9403580	0.0151939	0.00446931	0.000674829	1.01531	1.00645	1.02424
genus.LachnospiraceaeUCG001.id.11321	DVT	rs985416	0.00434673	0.00381243	0.254225	1.00436	0.996879	1.01189
genus.Slackia.id.825	DVT	rs10409783	-0.00257591	0.00361629	0.476274	0.997427	0.990383	1.00452
genus.Slackia.id.825	DVT	rs112764253	-8.80437e-05	0.00324792	0.978374	0.999912	0.993567	1.0063
genus.Slackia.id.825	DVT	rs12440440	-0.00118601	0.00343627	0.729986	0.998815	0.99211	1.00556
genus.Slackia.id.825	DVT	rs13339230	-0.00319232	0.00356576	0.370642	0.996813	0.98987	1.0038
genus.Slackia.id.825	DVT	rs16894137	-0.00678983	0.00345307	0.0492623	0.993233	0.986534	0.999978
genus.Slackia.id.825	DVT	rs35156985	-0.00132694	0.00394949	0.736887	0.998674	0.990973	1.00643
genus.Slackia.id.825	DVT	rs4492265	-0.00702708	0.00339205	0.0382995	0.992998	0.986418	0.999621
genus.Slackia.id.825	DVT	rs58767323	0.000874063	0.00346459	0.800821	1.00087	0.994101	1.00769
genus.Slackia.id.825	DVT	rs8901	-0.00274888	0.0032034	0.39083	0.997255	0.991013	1.00354
family.Alcaligenaceae.id.2875	PE	rs1153990	0.00467078	0.00264172	0.0770464	1.00468	0.999493	1.0099
family.Alcaligenaceae.id.2875	PE	rs147968	3.46122e-05	0.00271487	0.989828	1.00003	0.994727	1.00537
family.Alcaligenaceae.id.2875	PE	rs17000015	0.0038631	0.00250787	0.123466	1.00387	0.998948	1.00882
family.Alcaligenaceae.id.2875	PE	rs2367850	-6.09775e-05	0.00269024	0.981917	0.999939	0.99468	1.00523
family.Alcaligenaceae.id.2875	PE	rs28480294	-0.00100977	0.00266868	0.70515	0.998991	0.993779	1.00423
family.Alcaligenaceae.id.2875	PE	rs62191117	0.00104479	0.00236463	0.658605	1.00105	0.996417	1.0057
family.Alcaligenaceae.id.2875	PE	rs67737557	0.00494541	0.0022637	0.0289141	1.00496	1.00051	1.00943
family.Alcaligenaceae.id.2875	PE	rs6969323	0.00442806	0.00259782	0.0882814	1.00444	0.999337	1.00957
family.Alcaligenaceae.id.2875	PE	rs7638039	-0.000186642	0.00252951	0.941181	0.999813	0.994869	1.00478
family.Alcaligenaceae.id.2875	PE	rs9537886	0.0023739	0.00230623	0.30332	1.00238	0.997856	1.00692
family.Alcaligenaceae.id.2875	PE	rs9964679	-0.00389363	0.0026922	0.148103	0.996114	0.990872	1.00138
family.Christensenellaceae.id.1866	PE	rs12380890	0.000267136	0.00263326	0.919196	1.00027	0.995118	1.00544
family.Christensenellaceae.id.1866	PE	rs4805124	0.000463682	0.00270497	0.863895	1.00046	0.995174	1.00578
family.Christensenellaceae.id.1866	PE	rs62573205	0.00650603	0.00252323	0.00992441	1.00653	1.00156	1.01152
family.Christensenellaceae.id.1866	PE	rs7211194	0.00169111	0.00268197	0.528337	1.00169	0.996441	1.00697
family.Christensenellaceae.id.1866	PE	rs870002	-0.000392053	0.00270806	0.88489	0.999608	0.994316	1.00493
family.Christensenellaceae.id.1866	PE	rs892686	0.00493856	0.00261202	0.0586634	1.00495	0.999819	1.01011
family.Streptococcaceae.id.1850	PE	rs2952251	0.00376293	0.00234246	0.108186	1.00377	0.999172	1.00839
family.Streptococcaceae.id.1850	PE	rs35344081	0.00325147	0.00254176	0.20082	1.00326	0.998271	1.00827
family.Streptococcaceae.id.1850	PE	rs4968759	0.00249569	0.00243218	0.304839	1.0025	0.997731	1.00729
family.Streptococcaceae.id.1850	PE	rs6806351	0.0008248	0.00251632	0.743078	1.00083	0.995901	1.00577
family.Victivallaceae.id.2255	PE	rs11764871	0.00301089	0.00113663	0.00807372	1.00302	1.00078	1.00525
family.Victivallaceae.id.2255	PE	rs2546105	0.00282291	0.00115087	0.0141729	1.00283	1.00057	1.00509
family.Victivallaceae.id.2255	PE	rs2944282	0.00043251	0.00115632	0.708374	1.00043	0.998168	1.0027
family.Victivallaceae.id.2255	PE	rs67832247	-0.000330779	0.00124008	0.78967	0.999669	0.997242	1.0021
family.Victivallaceae.id.2255	PE	rs7314815	0.000455548	0.00129676	0.725366	1.00046	0.997916	1.003
genus.Eubacteriumhalliigroup.id.11338	PE	rs10798999	-0.000760656	0.00264042	0.773285	0.99924	0.994082	1.00442
genus.Eubacteriumhalliigroup.id.11338	PE	rs10808115	-0.00461649	0.00260526	0.0763971	0.995394	0.990324	1.00049
genus.Eubacteriumhalliigroup.id.11338	PE	rs281379	-0.00692694	0.00262508	0.00832117	0.993097	0.988	0.99822
genus.Eubacteriumhalliigroup.id.11338	PE	rs60254196	-0.00315205	0.00252068	0.211126	0.996853	0.99194	1.00179
genus.Eubacteriumhalliigroup.id.11338	PE	rs630939	-0.000887096	0.00262211	0.735127	0.999113	0.993992	1.00426
genus.Eubacteriumhalliigroup.id.11338	PE	rs78056098	-0.00277132	0.0027027	0.305179	0.997233	0.991964	1.00253
genus.Eubacteriumhalliigroup.id.11338	PE	rs949971	-0.000715735	0.00251074	0.775591	0.999285	0.994379	1.00421
genus.Actinomyces.id.423	PE	rs2715439	-0.00177289	0.00176492	0.31513	0.998229	0.994782	1.00169
genus.Actinomyces.id.423	PE	rs4073240	-0.00363836	0.00179827	0.0430469	0.996368	0.992863	0.999886
genus.Anaerotruncus.id.2054	PE	rs10150232	-0.0015618	0.00256345	0.542353	0.998439	0.993435	1.00347
genus.Anaerotruncus.id.2054	PE	rs1272208	-0.00401597	0.00253845	0.113637	0.995992	0.991049	1.00096
genus.Anaerotruncus.id.2054	PE	rs17734739	-0.00215741	0.00248676	0.385637	0.997845	0.992993	1.00272
genus.Anaerotruncus.id.2054	PE	rs34449434	-0.00150822	0.00284748	0.596342	0.998493	0.992936	1.00408
genus.Anaerotruncus.id.2054	PE	rs4669806	-0.00545925	0.00255862	0.0328699	0.994556	0.989581	0.999556
genus.Anaerotruncus.id.2054	PE	rs7155595	-0.00355072	0.00260314	0.172564	0.996456	0.991384	1.00155
genus.Anaerotruncus.id.2054	PE	rs7675045	0.00194094	0.00265374	0.464536	1.00194	0.996745	1.00717
genus.Anaerotruncus.id.2054	PE	rs8005030	-0.00295879	0.0025386	0.243809	0.997046	0.992097	1.00202
genus.Anaerotruncus.id.2054	PE	rs9347879	0.000870104	0.00259589	0.737486	1.00087	0.995791	1.00598
