# Supplementary material for: Gut microbiota and venous thromboembolism: a two-sample Mendelian randomization study Gut microbiota and venous thromboembolism
Source: Research Square preprint supplement (doi:10.21203/rs.3.rs-3834627/v1), 2024-01-08
Supplement: Supplementary file 6 [file f0fe2c472699127d7e6a7244.xlsx]

## Sheet: Sheet1
Table S7 Effect estimates of the associations of VTE, DVT, and PE with 15 bacterial traits in the heterogeneity analysis after excluding pleiotropic SNPs
Gut microbiota(exposure)	Outcome	Method	Q	Q_df	Q_pval	I2
family.Porphyromonadaceae.id.943	VTE	MR Egger	4.69329	7	0.697335	0.491492
		Inverse variance weighted	4.81731	8	0.776912	0.660678
phylum.Cyanobacteria.id.1500	VTE	MR Egger	2.80411	6	0.833001	1.13972
		Inverse variance weighted	3.99083	7	0.780833	0.754022
family.Defluviitaleaceae.id.1924	DVT	MR Egger	6.38246	9	0.701113	0.410115
		Inverse variance weighted	6.38911	10	0.781581	0.565163
family.Oxalobacteraceae.id.2966	DVT	MR Egger	17.9955	12	0.115827	0.333167
		Inverse variance weighted	18.3336	13	0.145257	0.290921
family.Ruminococcaceae.id.2050	DVT	MR Egger	11.6309	9	0.234926	0.226199
		Inverse variance weighted	12.1106	10	0.277721	0.174279
genus..Eubacteriumrectalegroup.id.14374	DVT	MR Egger	3.91048	8	0.865108	1.04578
		Inverse variance weighted	3.93384	9	0.915713	1.28784
genus.Erysipelatoclostridium.id.11381	DVT	MR Egger	13.7366	13	0.392649	0.0536259
		Inverse variance weighted	15.6054	14	0.338063	0.102872
genus.LachnospiraceaeUCG001.id.11321	DVT	MR Egger	15.9325	13	0.252792	0.560648
		Inverse variance weighted	16.287	14	0.296167	0.508809
genus.Slackia.id.825	DVT	MR Egger	4.50701	7	0.719873	0.331259
		Inverse variance weighted	4.88526	8	0.769767	0.432882
family.Alcaligenaceae.id.2875	PE	MR Egger	9.82401	8	0.277596	0.0838769
		Inverse variance weighted	12.6539	9	0.178903	0.209729
family.Christensenellaceae.id.1866	PE	MR Egger	2.07883	4	0.721263	4.77248
		Inverse variance weighted	6.05086	5	0.301301	1.14845
family.Streptococcaceae.id.1850	PE	MR Egger	0.000699025	1	0.978907	12874.1
		Weighted median	0.10795	2	0.947456	91.6353
family.Victivallaceae.id.2255	PE	MR Egger	6.19069	3	0.102693	0.292264
		Weighted median	7.12952	4	0.1292	0.262358
genus..Eubacteriumhalliigroup.id.11338	PE	MR Egger	1.21009	3	0.750584	9.74296
		Inverse variance weighted	1.7429	4	0.782911	7.03259
genus.Anaerotruncus.id.2054	PE	MR Egger	4.25159	7	0.750386	19.9334
		Inverse variance weighted	6.46843	8	0.594912	10.7494
