# Supplementary material for: Gut microbiota and venous thromboembolism: a two-sample Mendelian randomization study Gut microbiota and venous thromboembolism
Source: Research Square preprint supplement (doi:10.21203/rs.3.rs-3834627/v1), 2024-01-08
Supplement: Supplementary file 7 [file f850aade0ac7cef16dd451ab.xlsx]

## Sheet: Sheet3
Table S3 Instrumental variables (IVs) used in MR analysis of the association between 196 bacterial traits and PE among European populations.
						Gut microbiota						Pulmonary embolism (PE)
Gut microbiota	SNP	Chr	Pos	R2	F	Effect allele	Other allele	beta	se	P-value	Samplesize	Effect allele	Other allele	beta	se	P-value	Samplesize
class.Actinobacteria.id.419	rs10841473	12	20378911	0.00137119	22.3934	G	C	-0.0583765	0.0123353	2.59e-06	16311	G	C	9.93001e-05	0.000149269	0.51	463010
class.Actinobacteria.id.419	rs11655079	17	75348675	0.00124627	20.3482	T	C	-0.0560674	0.0124286	5.93e-06	16309	T	C	-4.51887e-05	0.00014535	0.760001	463010
class.Actinobacteria.id.419	rs11745923	5	475408	0.00145768	23.8095	G	T	0.0563759	0.0115529	1.58e-06	16312	G	T	7.00889e-05	0.000133537	0.6	463010
class.Actinobacteria.id.419	rs12049045	1	114665485	0.00122072	19.9331	A	G	0.0510452	0.0114325	8.63e-06	16311	A	G	-0.000182967	0.000135903	0.18	463010
class.Actinobacteria.id.419	rs1376754	2	161611969	0.00126456	20.4864	G	A	0.0509242	0.0112503	6.71e-06	16182	G	A	5.91774e-05	0.000132858	0.66	463010
class.Actinobacteria.id.419	rs182549	2	136616754	0.00520644	85.3667	C	T	0.111489	0.012066	3.79e-20	16313	C	T	-0.000264001	0.000148028	0.0749998	463010
class.Actinobacteria.id.419	rs4945008	11	71221248	0.00121486	19.8397	A	G	0.0540741	0.0121393	5.39e-06	16313	A	G	-3.4742e-05	0.00015756	0.83	463010
class.Actinobacteria.id.419	rs6660520	1	207003553	0.00171304	27.9808	A	G	0.0711483	0.0134495	1.11e-07	16308	A	G	0.000119488	0.000165788	0.47	463010
class.Actinobacteria.id.419	rs8047955	16	81776768	0.00148925	24.317	A	G	0.0575816	0.0116762	8.34e-07	16306	A	G	0.000165951	0.000137243	0.23	463010
class.Actinobacteria.id.419	rs857444	6	14617591	0.00119402	19.4978	C	T	0.0509553	0.011539	8.92e-06	16312	C	T	8.61124e-05	0.000137779	0.53	463010
class.Actinobacteria.id.419	rs961091	7	95654718	0.00121456	19.8324	G	A	0.0501255	0.011255	8.68e-06	16311	G	A	-0.000155519	0.000133768	0.24	463010
class.Alphaproteobacteria.id.2379	rs10803434	1	14238305	0.00237008	21.6499	A	T	-0.0692742	0.0148866	3.55e-06	9115	A	T	1.6022e-05	0.000132618	0.9	463010
class.Alphaproteobacteria.id.2379	rs12977163	19	28641647	0.00220395	20.1289	G	C	0.0690234	0.0153829	7.14e-06	9115	G	C	-0.00010131	0.00013524	0.450001	463010
class.Alphaproteobacteria.id.2379	rs34569731	2	75630344	0.00219247	20.0239	A	G	0.0705145	0.0157564	7.38e-06	9115	A	G	0.000189117	0.000151341	0.21	463010
class.Alphaproteobacteria.id.2379	rs55876211	3	84502332	0.00200405	19.2514	C	T	-0.080811	0.0184159	7.54e-06	9589	C	T	-0.00014701	0.000163399	0.37	463010
class.Alphaproteobacteria.id.2379	rs62285697	3	176407911	0.00216888	19.8079	C	T	0.0805256	0.0180912	9.76e-06	9115	C	T	-0.000121348	0.000158701	0.44	463010
class.Alphaproteobacteria.id.2379	rs9813022	3	13726736	0.00247902	23.8353	A	G	-0.0751277	0.0153867	1.05e-06	9593	A	G	-9.31893e-05	0.000143627	0.52	463010
class.Bacilli.id.1673	rs11730038	4	98049499	0.00137994	24.0097	G	A	-0.0630747	0.0128717	1.96e-06	17377	G	A	-0.000123078	0.000154592	0.43	463010
class.Bacilli.id.1673	rs12797734	11	8332350	0.00120332	20.3606	T	C	0.0572158	0.0126793	7.21e-06	16902	T	C	-0.000165698	0.000152059	0.28	463010
class.Bacilli.id.1673	rs1595463	2	231723657	0.00111063	19.2975	C	A	0.0476864	0.0108547	7.97e-06	17358	C	A	7.35241e-05	0.000132496	0.58	463010
class.Bacilli.id.1673	rs1962325	3	4800550	0.0013413	23.3083	C	G	0.0554219	0.0114789	1.38e-06	17356	C	G	-5.79843e-05	0.000142349	0.68	463010
class.Bacilli.id.1673	rs28564647	9	101101172	0.00114188	19.8525	T	G	-0.0613034	0.0137579	7.81e-06	17368	T	G	0.000149045	0.000165164	0.37	463010
class.Bacilli.id.1673	rs2952251	8	10143164	0.0013439	23.3588	A	G	-0.0598868	0.0123903	1.08e-06	17360	A	G	-0.000240563	0.000149753	0.11	463010
class.Bacilli.id.1673	rs35344081	16	991253	0.00136637	23.769	G	A	0.0619529	0.0127066	1.01e-06	17374	G	A	0.000198128	0.000154882	0.2	463010
class.Bacilli.id.1673	rs4028634	17	40835649	0.00129111	22.462	T	C	0.0520614	0.0109842	2.21e-06	17377	T	C	-4.18766e-05	0.000134984	0.760001	463010
class.Bacilli.id.1673	rs4459992	4	7431487	0.00121995	21.2042	T	C	0.0535854	0.0116362	4.3e-06	17362	T	C	-0.000162327	0.000142203	0.25	463010
class.Bacteroidia.id.912	rs11146701	10	39062269	0.00110668	20.1839	A	G	0.0473596	0.010541	7.08e-06	18220	A	G	3.11793e-05	0.00013314	0.81	463010
class.Bacteroidia.id.912	rs17343978	22	27433885	0.00114773	21.0645	A	C	-0.0552057	0.0120278	8.36e-06	18334	A	C	-9.76057e-05	0.000150896	0.52	463010
class.Bacteroidia.id.912	rs2032750	2	53831026	0.00126746	22.6542	T	C	-0.0508393	0.0106807	1.92e-06	17853	T	C	-4.99256e-06	0.000131785	0.97	463010
class.Bacteroidia.id.912	rs4916508	3	195936789	0.00107074	19.6392	G	A	-0.0466729	0.0105312	8.47e-06	18324	G	A	-0.000194326	0.000131899	0.14	463010
class.Bacteroidia.id.912	rs7546249	1	176792690	0.00125015	22.9452	T	A	-0.0567113	0.0118386	1.55e-06	18333	T	A	-0.000124556	0.000147168	0.4	463010
class.Bacteroidia.id.912	rs929878	16	74290641	0.00110994	20.3701	C	T	-0.0548532	0.012153	4.73e-06	18334	C	T	-0.000115908	0.000148976	0.44	463010
class.Betaproteobacteria.id.2867	rs11128180	3	70592215	0.00123475	21.2008	A	G	0.0592944	0.0128769	3.67e-06	17151	A	G	2.75338e-05	0.000154353	0.86	463010
class.Betaproteobacteria.id.2867	rs12467854	2	239888758	0.0013886	23.6891	G	C	0.0641363	0.0131766	1.1e-06	17038	G	C	-3.45421e-05	0.000160493	0.83	463010
class.Betaproteobacteria.id.2867	rs1928341	1	153240013	0.0013196	22.6584	A	G	0.0525581	0.0110408	2.02e-06	17150	A	G	9.84087e-06	0.000132865	0.94	463010
class.Betaproteobacteria.id.2867	rs2321387	13	58689340	0.00118993	20.428	G	A	-0.0494596	0.0109424	5.8e-06	17149	G	A	-0.000172106	0.000132512	0.19	463010
class.Betaproteobacteria.id.2867	rs2367850	3	193456274	0.0014397	24.0993	G	C	0.064006	0.0130374	9.12e-07	16717	G	C	-3.83612e-06	0.000169244	0.98	463010
class.Betaproteobacteria.id.2867	rs2613606	7	111285025	0.00128859	22.12	C	T	-0.0513106	0.0109091	2.2e-06	17146	C	T	-0.000315553	0.000132363	0.017	463010
class.Betaproteobacteria.id.2867	rs320161	9	104899117	0.00120571	20.5617	A	G	0.0572286	0.01262	7.33e-06	17035	A	G	1.47565e-05	0.000149248	0.92	463010
class.Betaproteobacteria.id.2867	rs56386628	8	112732674	0.00122499	21.0281	C	T	-0.0622252	0.0135688	5.87e-06	17147	C	T	9.96122e-05	0.000164355	0.54	463010
class.Betaproteobacteria.id.2867	rs9964679	18	26569901	0.00123562	21.2158	A	G	0.052911	0.0114866	4.85e-06	17151	A	G	-0.000209108	0.000144585	0.15	463010
class.Clostridia.id.1859	rs10774377	12	5942519	0.00116559	21.3879	A	G	0.052659	0.0113858	3.24e-06	18330	A	G	-0.000106069	0.000143107	0.46	463010
class.Clostridia.id.1859	rs112334273	21	40703251	0.00138766	25.3114	G	A	0.0641008	0.0127404	3.81e-07	18217	G	A	2.98264e-05	0.000160099	0.85	463010
class.Clostridia.id.1859	rs13105690	4	7420184	0.00109172	20.0418	T	C	-0.0529097	0.011818	8.78e-06	18340	T	C	-0.000145122	0.000148329	0.33	463010
class.Clostridia.id.1859	rs13179700	5	149077788	0.00118903	21.8279	T	C	0.0511937	0.0109569	3.37e-06	18338	T	C	-8.18859e-06	0.000138343	0.95	463010
class.Clostridia.id.1859	rs1842454	5	105060362	0.00100587	18.4642	G	A	-0.0547202	0.0127338	8.72e-06	18340	G	A	0.000166639	0.000156461	0.29	463010
class.Clostridia.id.1859	rs6934062	6	163743050	0.00114078	20.3942	G	C	0.0524406	0.0116115	6.53e-06	17859	G	C	-0.000188151	0.000144307	0.19	463010
class.Clostridia.id.1859	rs72915163	18	48792829	0.00126648	23.2249	T	C	-0.0581025	0.0120557	1.34e-06	18317	T	C	0.000256369	0.000151393	0.0899995	463010
class.Coriobacteriia.id.809	rs11073596	15	86433579	0.00113478	19.9096	T	G	0.0510212	0.0114339	8.14e-06	17527	T	G	-1.22782e-05	0.000143403	0.93	463010
class.Coriobacteriia.id.809	rs11250875	10	1922731	0.00121534	21.5232	T	C	0.06075	0.0130939	4.83e-06	17690	T	C	0.000241435	0.000162937	0.14	463010
class.Coriobacteriia.id.809	rs13307134	7	105084680	0.00114388	20.0695	C	T	0.0565686	0.0126265	7.8e-06	17527	C	T	-8.61174e-05	0.000154551	0.58	463010
class.Coriobacteriia.id.809	rs1397793	5	90471451	0.00112166	19.6792	G	A	-0.0498855	0.0112446	9.77e-06	17527	G	A	6.68435e-06	0.000143769	0.96	463010
class.Coriobacteriia.id.809	rs1816223	12	11494021	0.00116623	20.65	A	G	-0.0586265	0.0129006	4.84e-06	17688	A	G	-0.000354293	0.000162733	0.0290001	463010
class.Coriobacteriia.id.809	rs240104	1	176571431	0.0012858	22.6271	T	C	-0.0603429	0.0126849	1.52e-06	17577	T	C	4.86297e-05	0.000158705	0.760001	463010
class.Coriobacteriia.id.809	rs62448869	7	24464799	0.00113362	19.8892	T	A	-0.0486059	0.0108982	7.87e-06	17527	T	A	0.000124441	0.000132706	0.35	463010
class.Deltaproteobacteria.id.3087	rs1035691	11	10658735	0.00135551	20.5856	A	G	-0.055176	0.0121602	9.65e-06	15168	A	G	0.000161494	0.000136885	0.24	463010
class.Deltaproteobacteria.id.3087	rs11599763	10	11855599	0.00141479	21.4872	T	C	-0.0544219	0.0117397	3.94e-06	15168	T	C	0.000188183	0.000134968	0.16	463010
class.Deltaproteobacteria.id.3087	rs2838334	21	45064961	0.00134839	20.4774	G	A	0.0561722	0.0124124	5.45e-06	15168	G	A	9.13004e-05	0.000141085	0.52	463010
class.Deltaproteobacteria.id.3087	rs3935584	2	233929283	0.0013489	20.4824	C	T	-0.0523485	0.011566	7.5e-06	15166	C	T	-0.000123952	0.000132494	0.35	463010
class.Deltaproteobacteria.id.3087	rs62020470	15	96161065	0.0013484	20.4774	A	G	-0.0585411	0.0129358	4.85e-06	15168	A	G	-0.000113937	0.00014579	0.43	463010
class.Deltaproteobacteria.id.3087	rs9928243	16	71541641	0.00137759	20.9199	C	A	-0.0538457	0.0117718	5.02e-06	15167	C	A	0.000131944	0.000133583	0.32	463010
class.Erysipelotrichia.id.2147	rs1074800	5	3002546	0.00114877	20.4567	A	G	0.0492438	0.010887	6.15e-06	17789	A	G	-9.71002e-05	0.000137997	0.48	463010
class.Erysipelotrichia.id.2147	rs10781552	10	133897233	0.00127068	22.6304	C	T	-0.0552212	0.0116074	2.33e-06	17789	C	T	9.4191e-05	0.000142202	0.51	463010
class.Erysipelotrichia.id.2147	rs1884466	1	64139196	0.00108423	19.7576	C	T	-0.0475363	0.0106939	9.53e-06	18205	C	T	2.04122e-05	0.000135563	0.88	463010
class.Erysipelotrichia.id.2147	rs2300774	3	195793712	0.00132092	24.0911	G	A	0.0524152	0.0106784	8.95e-07	18216	G	A	0.000251888	0.000134771	0.0619998	463010
class.Erysipelotrichia.id.2147	rs290833	1	97457427	0.0011198	19.9402	T	G	-0.0497374	0.0111376	8.03e-06	17789	T	G	-0.000279924	0.00013739	0.0420001	463010
class.Erysipelotrichia.id.2147	rs62504403	8	38803551	0.00166794	28.3673	C	T	0.0681159	0.0127883	1.12e-07	16981	C	T	-3.03834e-05	0.000153078	0.84	463010
class.Erysipelotrichia.id.2147	rs8003149	14	56156504	0.00116526	21.2454	C	T	0.0538798	0.0116888	4.08e-06	18213	C	T	0.000120414	0.000146606	0.41	463010
class.Gammaproteobacteria.id.3303	rs11181912	12	43572952	0.00148168	23.7643	G	A	-0.0579153	0.0118796	9.95e-07	16017	G	A	5.11637e-05	0.000140117	0.709999	463010
class.Gammaproteobacteria.id.3303	rs6469506	8	115123937	0.00135001	21.6578	T	A	0.0541424	0.0116333	3.29e-06	16023	T	A	0.000153815	0.000134276	0.25	463010
class.Gammaproteobacteria.id.3303	rs9494710	6	137612554	0.00131855	20.6599	C	T	-0.0549673	0.0120924	4.55e-06	15650	C	T	9.31222e-05	0.000135645	0.49	463010
class.Lentisphaeria.id.2250	rs1002941	15	101242690	0.00425588	20.2249	G	A	0.105025	0.0233484	8.15e-06	4734	G	A	-0.000134323	0.00014694	0.36	463010
class.Lentisphaeria.id.2250	rs11770843	7	146795379	0.00459233	21.6974	C	T	0.109431	0.0234879	1.91e-06	4705	C	T	0.000480023	0.000146731	0.00109999	463010
class.Lentisphaeria.id.2250	rs2731834	5	94720245	0.00448751	21.3261	C	G	0.109438	0.023693	4.24e-06	4733	C	G	0.000279905	0.000149173	0.061	463010
class.Melainabacteria.id.1589	rs10148250	14	107061448	0.00362995	19.859	G	A	0.0861928	0.0193381	8.67e-06	5453	G	A	-1.72555e-05	0.000132073	0.9	463010
class.Melainabacteria.id.1589	rs10738747	9	26184578	0.00330551	19.5075	G	A	0.0814624	0.0184409	9.96e-06	5884	G	A	-0.000203152	0.000131634	0.12	463010
class.Melainabacteria.id.1589	rs11150282	16	80493705	0.0042785	25.227	T	C	0.0989488	0.0196972	6.03e-07	5873	T	C	-0.000109398	0.000141495	0.44	463010
class.Melainabacteria.id.1589	rs16851659	1	230523039	0.0039111	23.0954	G	C	-0.0896103	0.0186432	1.27e-06	5884	G	C	-7.91934e-05	0.000132291	0.55	463010
class.Melainabacteria.id.1589	rs367480	11	2937631	0.00344025	20.3157	G	A	-0.083758	0.0185796	8.2e-06	5887	G	A	-0.000191289	0.000133064	0.15	463010
class.Melainabacteria.id.1589	rs4129395	9	115975389	0.00396586	23.432	G	A	0.0896187	0.0185106	1.48e-06	5887	G	A	4.1058e-05	0.000132023	0.760001	463010
class.Methanobacteria.id.119	rs10202904	2	125440268	0.00719054	26.747	T	G	-0.121754	0.0235357	3.01e-07	3695	T	G	-5.73566e-05	0.000132917	0.67	463010
class.Methanobacteria.id.119	rs10424197	19	46439321	0.00543557	20.1997	G	A	-0.111274	0.0247517	9.28e-06	3698	G	A	-2.69752e-05	0.000139084	0.85	463010
class.Methanobacteria.id.119	rs11018665	11	89349287	0.00532506	19.7868	A	T	0.111465	0.0250516	6.52e-06	3698	A	T	0.000275324	0.000137272	0.0449997	463010
class.Mollicutes.id.3920	rs10108398	8	59440824	0.00227797	24.9551	G	A	0.0769142	0.0153953	1.09e-06	10932	G	A	3.9301e-05	0.000147576	0.79	463010
class.Mollicutes.id.3920	rs11890098	2	157532549	0.00206304	23.5466	A	G	0.074438	0.0153389	9.57e-07	11392	A	G	0.000133072	0.000153532	0.39	463010
class.Mollicutes.id.3920	rs17214486	14	97159674	0.00177285	20.2198	C	A	0.06099	0.0135623	6.61e-06	11387	C	A	-0.000335943	0.000135234	0.0129999	463010
class.Mollicutes.id.3920	rs3768491	1	109965986	0.00189381	20.8715	A	G	-0.0681052	0.0149061	4.23e-06	11002	A	G	-0.000128918	0.000145508	0.38	463010
class.Mollicutes.id.3920	rs72901605	11	47103877	0.00211771	22.3341	T	C	-0.0841852	0.0178119	3.26e-06	10526	T	C	0.00010627	0.000166827	0.52	463010
class.Negativicutes.id.2164	rs1135612	7	75609677	0.00108676	19.7592	G	A	0.0529785	0.0119177	9.26e-06	18164	G	A	9.88781e-05	0.000150403	0.51	463010
class.Negativicutes.id.2164	rs13086907	3	142135117	0.00123898	22.5291	G	A	0.0625312	0.0131735	1.95e-06	18163	G	A	-0.000456932	0.000159372	0.00409996	463010
class.Negativicutes.id.2164	rs1447205	8	41231597	0.00117988	21.4554	G	C	-0.0502053	0.0108382	2.93e-06	18165	G	C	-4.32151e-05	0.000134588	0.75	463010
class.Negativicutes.id.2164	rs1643968	5	165266628	0.00139261	25.3362	T	C	-0.0565284	0.0112298	4.15e-07	18170	T	C	0.000271343	0.000143456	0.0589997	463010
class.Negativicutes.id.2164	rs2834062	21	34377485	0.00110986	20.1874	A	G	0.0489057	0.0108842	8.44e-06	18171	A	G	0.000181106	0.000141167	0.2	463010
class.Negativicutes.id.2164	rs4463806	10	115597993	0.000972681	17.6791	T	C	-0.0543966	0.0129365	7.81e-06	18160	T	C	8.39111e-05	0.000155772	0.59	463010
class.Negativicutes.id.2164	rs4722181	7	22817571	0.0012346	22.4493	T	G	0.0501306	0.0105798	2e-06	18163	T	G	2.68639e-05	0.000131332	0.84	463010
class.Negativicutes.id.2164	rs60274479	16	21249925	0.00137132	24.1794	T	C	-0.0659623	0.0134137	1.16e-06	17610	T	C	-3.51867e-05	0.000169097	0.84	463010
class.Negativicutes.id.2164	rs9423647	10	5579818	0.00113436	20.6257	G	A	0.047817	0.0105282	6.06e-06	18164	G	A	-4.95969e-05	0.000131382	0.709999	463010
class.Verrucomicrobiae.id.4029	rs11184341	1	105422565	0.00178625	21.2264	G	C	0.0655342	0.0142231	4.13e-06	11864	G	C	1.88887e-05	0.000147416	0.9	463010
class.Verrucomicrobiae.id.4029	rs11729256	4	95027272	0.00209725	24.9235	T	C	0.0749798	0.0150177	6.73e-07	11861	T	C	-0.000105438	0.000149962	0.48	463010
class.Verrucomicrobiae.id.4029	rs12908520	15	97570657	0.00187966	22.3366	G	A	0.0618926	0.0130946	2.17e-06	11863	G	A	3.14005e-05	0.000132453	0.81	463010
class.Verrucomicrobiae.id.4029	rs2602429	16	81063149	0.00195194	22.8589	C	T	0.0746844	0.0156194	2.58e-06	11690	C	T	-4.51029e-05	0.000159912	0.780001	463010
class.Verrucomicrobiae.id.4029	rs4242783	10	5064327	0.00185979	21.7777	G	A	0.0689292	0.0147693	2.64e-06	11690	G	A	-0.000107276	0.000149522	0.47	463010
class.Verrucomicrobiae.id.4029	rs4936098	11	130280667	0.00191785	22.7817	A	G	0.0648843	0.0135928	1.12e-06	11858	A	G	-0.000179266	0.000136253	0.19	463010
class.Verrucomicrobiae.id.4029	rs9349825	6	56341481	0.0019273	22.8942	A	G	-0.0704036	0.0147128	2.54e-06	11858	A	G	-0.000267094	0.000149171	0.0729995	463010
class.Verrucomicrobiae.id.4029	rs941682	20	31867840	0.00163086	19.287	G	A	-0.0631436	0.0143767	9.61e-06	11809	G	A	-0.000129652	0.000147027	0.38	463010
family.Acidaminococcaceae.id.2166	rs262812	6	158647999	0.0017585	21.31	T	C	-0.065675	0.0142257	3.25e-06	12099	T	C	-6.80787e-05	0.000149329	0.649999	463010
family.Acidaminococcaceae.id.2166	rs2933324	9	107117653	0.00177848	22.3116	A	G	-0.0662557	0.0140257	2.24e-06	12525	A	G	4.23879e-05	0.000146286	0.77	463010
family.Acidaminococcaceae.id.2166	rs6427992	1	203102563	0.00168458	21.135	G	C	-0.0595857	0.01296	4.24e-06	12527	G	C	-3.3439e-05	0.000133639	0.8	463010
family.Acidaminococcaceae.id.2166	rs6923842	6	5723414	0.00185644	22.1364	T	C	-0.0796106	0.0169192	2.21e-06	11904	T	C	0.000172744	0.000165839	0.3	463010
family.Actinomycetaceae.id.421	rs2889192	9	76394568	0.00267945	20.7087	G	T	0.0887537	0.0195009	3.64e-06	7710	G	T	0.000270861	0.000156139	0.0830004	463010
family.Actinomycetaceae.id.421	rs4073240	6	169224781	0.0026654	20.5998	G	A	0.0747546	0.0164684	6.05e-06	7710	G	A	-0.000272763	0.000134814	0.0430002	463010
family.Actinomycetaceae.id.421	rs58484246	15	29850991	0.00262561	20.2915	T	C	0.0761407	0.0169007	6.12e-06	7710	T	C	0.000153642	0.000137792	0.26	463010
family.Bacteroidaceae.id.917	rs13207588	6	41519430	0.00114879	20.3627	A	G	-0.059205	0.0131195	7.49e-06	17707	A	G	0.0001167	0.000160904	0.47	463010
family.Bacteroidaceae.id.917	rs1340391	1	102960989	0.00109376	20.0377	T	C	-0.0592004	0.0132244	6.73e-06	18302	T	C	6.43109e-05	0.000164769	0.7	463010
family.Bacteroidaceae.id.917	rs2366421	3	62019400	0.00110998	20.3319	T	A	-0.0528153	0.0117124	7.65e-06	18299	T	A	-0.000102902	0.000148102	0.49	463010
family.Bacteroidaceae.id.917	rs495004	9	112855426	0.00123421	21.8787	C	G	-0.0607475	0.0129865	3.42e-06	17707	C	G	0.00016588	0.000164179	0.31	463010
family.Bacteroidaceae.id.917	rs66710942	3	77215327	0.00115709	20.642	C	T	0.0488038	0.0107412	5.86e-06	17821	C	T	-4.48673e-05	0.000134088	0.74	463010
family.Bacteroidaceae.id.917	rs6795673	3	10593224	0.00142865	26.1803	C	T	0.0538565	0.0105251	3.38e-07	18301	C	T	3.72981e-05	0.000132099	0.780001	463010
family.Bacteroidaceae.id.917	rs9507307	13	24910476	0.00120359	21.91	C	T	0.0604456	0.0129128	2.13e-06	18184	C	T	-0.000141906	0.000166144	0.39	463010
family.BacteroidalesS24.7group.id.11173	rs11135366	5	164763068	0.00263446	21.0019	C	G	0.0842142	0.0183739	8.78e-06	7953	C	G	4.82387e-05	0.000147137	0.74	463010
family.BacteroidalesS24.7group.id.11173	rs12748533	1	242767252	0.0028361	22.5998	G	T	-0.0821108	0.0172701	2.59e-06	7948	G	T	0.0002083	0.000145645	0.15	463010
family.BacteroidalesS24.7group.id.11173	rs6831034	4	149300138	0.00285927	21.7182	T	A	-0.0956546	0.0205228	6.1e-06	7576	T	A	3.91647e-06	0.000166646	0.98	463010
family.BacteroidalesS24.7group.id.11173	rs689695	15	47352866	0.00298027	23.7699	C	A	0.0814578	0.0167057	1.28e-06	7954	C	A	-4.52038e-05	0.000136815	0.74	463010
family.BacteroidalesS24.7group.id.11173	rs7217209	17	21205200	0.00260859	20.2512	C	T	0.0843019	0.0187308	8.43e-06	7745	C	T	7.85386e-05	0.000178049	0.66	463010
family.BacteroidalesS24.7group.id.11173	rs738193	22	25943322	0.0033444	26.0933	T	C	0.0847328	0.0165856	3.82e-07	7778	T	C	-1.01033e-05	0.000136089	0.94	463010
family.BacteroidalesS24.7group.id.11173	rs78609301	6	63236747	0.00246197	19.6234	A	G	-0.0867065	0.0195709	7.09e-06	7953	A	G	3.90786e-05	0.000164245	0.81	463010
family.BacteroidalesS24.7group.id.11173	rs941000	7	90714667	0.00346994	27.0762	C	T	0.0850266	0.0163382	3.16e-07	7778	C	T	6.41686e-05	0.000132757	0.630001	463010
family.Bifidobacteriaceae.id.433	rs10831953	11	13098051	0.00126352	18.8668	G	A	0.0537537	0.0123746	9.95e-06	14915	G	A	-6.06763e-05	0.000137331	0.66	463010
family.Bifidobacteriaceae.id.433	rs10841473	12	20378911	0.00151559	22.6347	G	C	-0.0613031	0.0128844	2.28e-06	14914	G	C	9.93001e-05	0.000149269	0.51	463010
family.Bifidobacteriaceae.id.433	rs10857328	4	161211924	0.00132377	19.7676	T	A	0.0562	0.0126395	7.24e-06	14915	T	A	-3.87342e-05	0.000143159	0.79	463010
family.Bifidobacteriaceae.id.433	rs13020688	2	192878532	0.00154457	22.8841	G	A	0.0584045	0.0122081	1.57e-06	14795	G	A	0.000170193	0.00013573	0.21	463010
family.Bifidobacteriaceae.id.433	rs182549	2	136616754	0.0056913	85.3602	C	T	0.11707	0.0126703	5.94e-20	14915	C	T	-0.000264001	0.000148028	0.0749998	463010
family.Bifidobacteriaceae.id.433	rs4567981	2	49906864	0.00163465	24.2209	T	A	0.0577763	0.0117388	8.88e-07	14795	T	A	1.24491e-06	0.000133546	0.99	463010
family.Bifidobacteriaceae.id.433	rs4957061	5	521096	0.00160347	23.7582	T	C	0.0569873	0.0116907	1.15e-06	14795	T	C	4.95976e-05	0.000132765	0.709999	463010
family.Bifidobacteriaceae.id.433	rs540489	17	72897722	0.00142475	20.9538	T	G	-0.0632518	0.013817	5.37e-06	14688	T	G	9.43641e-05	0.000155372	0.54	463010
family.Bifidobacteriaceae.id.433	rs55888705	4	1517826	0.00132662	19.8088	A	G	0.053673	0.0120586	8.66e-06	14914	A	G	-0.000142122	0.000136065	0.3	463010
family.Bifidobacteriaceae.id.433	rs7174549	15	92463303	0.00131171	19.5872	C	T	0.0551726	0.0124655	6.87e-06	14915	C	T	-0.000117443	0.000139598	0.4	463010
family.Bifidobacteriaceae.id.433	rs857444	6	14617591	0.00141112	21.0723	C	T	0.0553965	0.0120669	3.82e-06	14914	C	T	8.61124e-05	0.000137779	0.53	463010
family.Clostridiaceae1.id.1869	rs10875374	1	101804809	0.00141504	20.1943	C	T	-0.0536759	0.0119436	8.1e-06	14253	C	T	-8.75363e-05	0.000131666	0.51	463010
family.Clostridiaceae1.id.1869	rs12490337	3	111482845	0.00142223	20.297	C	G	-0.0616944	0.013693	6.91e-06	14253	C	G	-5.30278e-06	0.000153867	0.97	463010
family.Clostridiaceae1.id.1869	rs2817172	1	3041519	0.00149663	20.665	C	T	0.0563367	0.012392	5.27e-06	13789	C	T	-8.07319e-05	0.000136276	0.55	463010
family.Clostridiaceae1.id.1869	rs62397761	6	48093014	0.00143274	20.4402	A	G	0.0615805	0.0136198	9.08e-06	14248	A	G	-0.000241337	0.000148225	0.1	463010
family.Clostridiaceae1.id.1869	rs881532	22	47806774	0.00140577	20.0576	A	G	-0.0533035	0.0119011	7.9e-06	14250	A	G	-8.06599e-05	0.000131072	0.54	463010
family.ClostridialesvadinBB60group.id.11286	rs10517600	4	155632958	0.00192177	20.2367	T	G	0.0626993	0.0139364	6.83e-06	10512	T	G	-2.27327e-05	0.000131333	0.86	463010
family.ClostridialesvadinBB60group.id.11286	rs10904722	10	6714424	0.0019826	20.8785	C	T	-0.0672314	0.0147123	5.05e-06	10512	C	T	-0.000223715	0.000140992	0.11	463010
family.ClostridialesvadinBB60group.id.11286	rs2191834	2	229942951	0.00208845	21.9935	G	T	0.0746375	0.0159136	2.5e-06	10511	G	T	-7.10133e-05	0.000150433	0.64	463010
family.ClostridialesvadinBB60group.id.11286	rs6588624	1	56849539	0.00218181	22.981	G	A	-0.0662317	0.0138147	1.79e-06	10512	G	A	-1.56003e-05	0.000131939	0.91	463010
family.ClostridialesvadinBB60group.id.11286	rs6755871	2	202450739	0.00185445	19.5042	C	G	-0.0613825	0.0138976	9.33e-06	10500	C	G	-1.6914e-05	0.000132008	0.9	463010
family.ClostridialesvadinBB60group.id.11286	rs7226487	18	74373125	0.00204595	21.5327	A	G	-0.0643682	0.0138701	3.58e-06	10505	A	G	0.00018601	0.000132178	0.16	463010
family.ClostridialesvadinBB60group.id.11286	rs7538034	1	71391694	0.00214733	22.419	T	G	-0.078598	0.0165982	2.37e-06	10420	T	G	0.000108217	0.000158755	0.5	463010
family.ClostridialesvadinBB60group.id.11286	rs989682	3	15564453	0.00201121	20.4086	A	G	0.070194	0.0155364	6.85e-06	10129	A	G	5.01934e-05	0.000143325	0.73	463010
family.ClostridialesvadinBB60group.id.11286	rs9979874	21	38612024	0.00227682	23.9703	G	C	-0.0738925	0.0150911	1.05e-06	10506	G	C	3.63997e-05	0.000147305	0.8	463010
family.Coriobacteriaceae.id.811	rs11073596	15	86433579	0.00113478	19.9096	T	G	0.0510212	0.0114339	8.14e-06	17527	T	G	-1.22782e-05	0.000143403	0.93	463010
family.Coriobacteriaceae.id.811	rs11250875	10	1922731	0.00121534	21.5232	T	C	0.06075	0.0130939	4.83e-06	17690	T	C	0.000241435	0.000162937	0.14	463010
family.Coriobacteriaceae.id.811	rs13307134	7	105084680	0.00114388	20.0695	C	T	0.0565686	0.0126265	7.8e-06	17527	C	T	-8.61174e-05	0.000154551	0.58	463010
family.Coriobacteriaceae.id.811	rs1397793	5	90471451	0.00112166	19.6792	G	A	-0.0498855	0.0112446	9.77e-06	17527	G	A	6.68435e-06	0.000143769	0.96	463010
family.Coriobacteriaceae.id.811	rs1816223	12	11494021	0.00116623	20.65	A	G	-0.0586265	0.0129006	4.84e-06	17688	A	G	-0.000354293	0.000162733	0.0290001	463010
family.Coriobacteriaceae.id.811	rs240104	1	176571431	0.0012858	22.6271	T	C	-0.0603429	0.0126849	1.52e-06	17577	T	C	4.86297e-05	0.000158705	0.760001	463010
family.Coriobacteriaceae.id.811	rs62448869	7	24464799	0.00113362	19.8892	T	A	-0.0486059	0.0108982	7.87e-06	17527	T	A	0.000124441	0.000132706	0.35	463010
family.Defluviitaleaceae.id.1924	rs1582238	1	118723685	0.00287123	23.036	T	C	0.0801923	0.0167061	1.69e-06	8002	T	C	0.000148549	0.000140183	0.29	463010
family.Defluviitaleaceae.id.1924	rs1908593	18	59026148	0.00244532	20.1032	T	C	0.070223	0.0156601	7.86e-06	8203	T	C	-2.56257e-05	0.000132229	0.85	463010
family.Defluviitaleaceae.id.1924	rs4344384	10	66407366	0.00250741	20.6074	G	T	0.0708803	0.0156121	5.86e-06	8200	G	T	9.52345e-05	0.000131764	0.47	463010
family.Defluviitaleaceae.id.1924	rs4677103	3	72207794	0.00306452	24.5915	A	G	0.0977203	0.0197033	9.42e-07	8002	A	G	2.59223e-05	0.000170958	0.88	463010
family.Desulfovibrionaceae.id.3169	rs11599763	10	11855599	0.00147635	22.385	T	C	-0.0555931	0.0117493	2.5e-06	15142	T	C	0.000188183	0.000134968	0.16	463010
family.Desulfovibrionaceae.id.3169	rs2838334	21	45064961	0.0013953	21.1544	G	A	0.0571419	0.012423	3.82e-06	15142	G	A	9.13004e-05	0.000141085	0.52	463010
family.Desulfovibrionaceae.id.3169	rs3935584	2	233929283	0.0013611	20.6324	C	T	-0.0525838	0.0115757	6.78e-06	15140	C	T	-0.000123952	0.000132494	0.35	463010
family.Desulfovibrionaceae.id.3169	rs7164160	15	96159374	0.00129848	19.6846	A	T	-0.0574455	0.0129468	7.34e-06	15142	A	T	-9.71998e-05	0.000145755	0.5	463010
family.Desulfovibrionaceae.id.3169	rs9928243	16	71541641	0.00139437	21.1389	C	A	-0.0541732	0.0117819	4.48e-06	15141	C	A	0.000131944	0.000133583	0.32	463010
family.Enterobacteriaceae.id.3469	rs2374342	2	42133542	0.00156913	21.3345	C	A	0.0582927	0.0126195	4.52e-06	13577	C	A	-5.52417e-05	0.000136934	0.69	463010
family.Enterobacteriaceae.id.3469	rs61973590	14	27718039	0.00150869	20.5008	C	G	-0.0605392	0.0133696	8.54e-06	13570	C	G	-0.000179151	0.000146617	0.22	463010
family.Enterobacteriaceae.id.3469	rs62210023	20	55340092	0.00160616	21.739	A	G	0.0606754	0.0130125	3.13e-06	13515	A	G	-7.91085e-05	0.000139046	0.57	463010
family.Erysipelotrichaceae.id.2149	rs1074800	5	3002546	0.00114877	20.4567	A	G	0.0492438	0.010887	6.15e-06	17789	A	G	-9.71002e-05	0.000137997	0.48	463010
family.Erysipelotrichaceae.id.2149	rs10781552	10	133897233	0.00127068	22.6304	C	T	-0.0552212	0.0116074	2.33e-06	17789	C	T	9.4191e-05	0.000142202	0.51	463010
family.Erysipelotrichaceae.id.2149	rs1884466	1	64139196	0.00108423	19.7576	C	T	-0.0475363	0.0106939	9.53e-06	18205	C	T	2.04122e-05	0.000135563	0.88	463010
family.Erysipelotrichaceae.id.2149	rs2300774	3	195793712	0.00132092	24.0911	G	A	0.0524152	0.0106784	8.95e-07	18216	G	A	0.000251888	0.000134771	0.0619998	463010
family.Erysipelotrichaceae.id.2149	rs290833	1	97457427	0.0011198	19.9402	T	G	-0.0497374	0.0111376	8.03e-06	17789	T	G	-0.000279924	0.00013739	0.0420001	463010
family.Erysipelotrichaceae.id.2149	rs62504403	8	38803551	0.00166794	28.3673	C	T	0.0681159	0.0127883	1.12e-07	16981	C	T	-3.03834e-05	0.000153078	0.84	463010
family.Erysipelotrichaceae.id.2149	rs8003149	14	56156504	0.00116526	21.2454	C	T	0.0538798	0.0116888	4.08e-06	18213	C	T	0.000120414	0.000146606	0.41	463010
family.FamilyXI.id.1936	rs17379710	11	35334668	0.00670644	21.2949	T	C	-0.116383	0.0252125	3.97e-06	3156	T	C	-7.63245e-06	0.000132227	0.95	463010
family.FamilyXI.id.1936	rs2155352	11	95357209	0.00780986	24.7789	A	G	-0.150538	0.0302319	6.63e-07	3150	A	G	-7.92982e-05	0.000159667	0.62	463010
family.FamilyXI.id.1936	rs2156611	18	43345864	0.00632058	20.0555	T	C	-0.112486	0.0251099	9.43e-06	3155	T	C	-0.000284484	0.000131941	0.0309999	463010
family.FamilyXI.id.1936	rs3733511	4	119955787	0.00685865	21.7816	A	G	0.128253	0.0274718	3.39e-06	3156	A	G	-7.21582e-06	0.000143421	0.96	463010
family.FamilyXI.id.1936	rs488164	1	239995451	0.00674544	21.3721	T	G	0.117998	0.025516	4.8e-06	3149	T	G	-0.000217636	0.000134448	0.11	463010
family.FamilyXI.id.1936	rs6025153	20	55348292	0.00650767	20.4893	G	C	0.118619	0.0261969	7.07e-06	3130	G	C	-0.00014045	0.000135197	0.3	463010
family.FamilyXI.id.1936	rs697771	16	54115200	0.00689836	21.8808	A	G	-0.117677	0.0251491	3.19e-06	3152	A	G	-4.79463e-05	0.0001333	0.719999	463010
family.FamilyXIII.id.1957	rs10404377	19	16174657	0.0012469	20.3086	C	A	-0.0503183	0.011165	6.99e-06	16269	C	A	0.000287884	0.000138449	0.0379997	463010
family.FamilyXIII.id.1957	rs12643275	4	162211872	0.00137322	22.369	A	T	-0.0550907	0.0116474	2.42e-06	16269	A	T	-7.14615e-05	0.000138789	0.61	463010
family.FamilyXIII.id.1957	rs1887048	1	65170838	0.00119652	20.0239	G	A	0.0579979	0.0129602	9.65e-06	16717	G	A	7.39285e-05	0.000154326	0.630001	463010
family.FamilyXIII.id.1957	rs1999289	21	19685992	0.00128572	20.9417	A	T	-0.0637366	0.013927	2.54e-06	16269	A	T	7.94464e-05	0.000170282	0.64	463010
family.FamilyXIII.id.1957	rs3098182	15	50802980	0.00127243	21.3136	G	T	0.0508511	0.011014	4.04e-06	16731	G	T	-0.000220784	0.00013343	0.0980009	463010
family.FamilyXIII.id.1957	rs482905	1	166557202	0.00131293	22.0008	G	T	0.0596528	0.012717	3.72e-06	16737	G	T	-0.000327002	0.000151424	0.0309999	463010
family.FamilyXIII.id.1957	rs6501525	17	70218627	0.00144871	23.6003	A	G	0.0561559	0.0115587	1.24e-06	16269	A	G	5.8816e-06	0.000137301	0.97	463010
family.FamilyXIII.id.1957	rs66753613	1	39212021	0.00125083	20.3728	G	A	0.0651136	0.0144251	8.08e-06	16269	G	A	1.64655e-05	0.000164767	0.92	463010
family.FamilyXIII.id.1957	rs7076829	10	7906746	0.00129771	21.1373	T	A	-0.0516394	0.0112313	4.76e-06	16269	T	A	-4.89381e-05	0.000134812	0.719999	463010
family.Lachnospiraceae.id.1987	rs11139361	9	72179847	0.00109096	20.0202	T	C	0.0494463	0.0110503	4.26e-06	18333	T	C	-0.000191263	0.000136021	0.16	463010
family.Lachnospiraceae.id.1987	rs112040820	17	80469064	0.00125655	22.0298	A	G	0.0549584	0.0117086	2.42e-06	17512	A	G	0.000140991	0.00014728	0.34	463010
family.Lachnospiraceae.id.1987	rs11755180	6	161957425	0.00119991	22.0221	C	G	-0.049227	0.0104894	2.69e-06	18333	C	G	-0.00020228	0.000131971	0.13	463010
family.Lachnospiraceae.id.1987	rs11979110	7	130436459	0.00123789	22.7274	T	C	-0.0500924	0.0105069	1.82e-06	18339	T	C	-9.66412e-06	0.000131029	0.94	463010
family.Lachnospiraceae.id.1987	rs1205443	20	36876868	0.00112291	19.9844	A	G	0.0501415	0.0112157	7.29e-06	17779	A	G	-7.86847e-05	0.000140184	0.57	463010
family.Lachnospiraceae.id.1987	rs12760724	1	214031969	0.00109777	20.1531	A	C	-0.0484566	0.0107934	7.27e-06	18340	A	C	0.000194655	0.000134774	0.15	463010
family.Lachnospiraceae.id.1987	rs2159863	4	10245354	0.00112775	20.7041	A	G	-0.0585831	0.0128742	3.7e-06	18340	A	G	-0.000154233	0.000160886	0.34	463010
family.Lachnospiraceae.id.1987	rs3127230	10	103392503	0.00109697	20.1384	C	T	-0.0503537	0.0112201	6.2e-06	18340	C	T	4.45548e-05	0.000139642	0.75	463010
family.Lachnospiraceae.id.1987	rs35524804	9	100113683	0.00131619	23.5342	T	C	-0.0607481	0.0125216	2.45e-06	17859	T	C	0.000159852	0.000153022	0.3	463010
family.Lachnospiraceae.id.1987	rs7359994	19	29408858	0.0010898	20.0065	T	C	-0.0503142	0.0112482	5.36e-06	18340	T	C	-0.000231689	0.000136773	0.0899995	463010
family.Lachnospiraceae.id.1987	rs959845	4	186906801	0.00117287	20.9686	C	T	-0.0493666	0.0107801	5.17e-06	17859	C	T	0.000150592	0.000136148	0.27	463010
family.Lactobacillaceae.id.1836	rs11674854	2	28903275	0.00331316	22.4315	C	T	-0.0830224	0.0175267	2.6e-06	6750	C	T	9.12777e-05	0.00013529	0.5	463010
family.Lactobacillaceae.id.1836	rs1530559	2	135755629	0.00281615	19.057	G	A	0.0772453	0.0176921	9.65e-06	6750	G	A	-0.000109209	0.000132689	0.41	463010
family.Lactobacillaceae.id.1836	rs1590596	13	23836941	0.00328374	22.2317	C	G	-0.10381	0.0220135	3.9e-06	6750	C	G	-0.000245595	0.00016283	0.13	463010
family.Lactobacillaceae.id.1836	rs328312	16	73890910	0.00340175	24.0608	T	A	0.082529	0.0168225	8.69e-07	7051	T	A	0.000224261	0.000131964	0.089	463010
family.Lactobacillaceae.id.1836	rs6092149	20	54192992	0.00334444	23.5031	A	T	-0.0825646	0.0170282	1.38e-06	7006	A	T	-0.000173818	0.0001327	0.19	463010
family.Lactobacillaceae.id.1836	rs768253	8	69010103	0.00304635	21.5638	T	G	-0.0792344	0.0170604	3.61e-06	7059	T	G	6.70944e-05	0.000134383	0.62	463010
family.Lactobacillaceae.id.1836	rs921925	19	6928017	0.00346941	24.5479	A	C	0.0999419	0.0201687	5.77e-07	7053	A	C	-4.09441e-05	0.000161332	0.8	463010
family.Methanobacteriaceae.id.121	rs10202904	2	125440268	0.00719054	26.747	T	G	-0.121754	0.0235357	3.01e-07	3695	T	G	-5.73566e-05	0.000132917	0.67	463010
family.Methanobacteriaceae.id.121	rs10424197	19	46439321	0.00543557	20.1997	G	A	-0.111274	0.0247517	9.28e-06	3698	G	A	-2.69752e-05	0.000139084	0.85	463010
family.Methanobacteriaceae.id.121	rs11018665	11	89349287	0.00532506	19.7868	A	T	0.111465	0.0250516	6.52e-06	3698	A	T	0.000275324	0.000137272	0.0449997	463010
family.Oxalobacteraceae.id.2966	rs4428215	3	171947435	0.0057366	29.8005	G	A	0.12561	0.0230053	4.88e-08	5167	G	A	5.38866e-05	0.000156805	0.73	463010
family.Oxalobacteraceae.id.2966	rs561239	12	18793583	0.00396573	19.8558	A	G	0.105525	0.0236769	7.19e-06	4989	A	G	8.36693e-05	0.000153982	0.59	463010
family.Oxalobacteraceae.id.2966	rs6000536	22	37421469	0.00463546	24.049	C	T	-0.118383	0.0241355	7.39e-07	5166	C	T	-2.87349e-05	0.000164233	0.86	463010
family.Oxalobacteraceae.id.2966	rs736744	9	87514407	0.00533632	27.7099	C	T	0.105642	0.0200648	1.49e-07	5167	C	T	-9.98498e-05	0.000134132	0.46	463010
family.Oxalobacteraceae.id.2966	rs7993559	13	23443627	0.00418655	20.9661	C	A	0.0921059	0.0201114	5.04e-06	4989	C	A	0.000159401	0.000134981	0.24	463010
family.Oxalobacteraceae.id.2966	rs934049	2	16056779	0.00425406	21.1433	G	A	0.109751	0.0238636	4.21e-06	4951	G	A	-0.000126243	0.000155784	0.42	463010
family.Pasteurellaceae.id.3689	rs10840326	11	9951672	0.00251995	23.1208	C	G	-0.0717634	0.0149229	1.44e-06	9154	C	G	-0.000235886	0.000132058	0.0739997	463010
family.Pasteurellaceae.id.3689	rs12050685	15	73477482	0.00205559	19.3809	A	G	-0.0670948	0.015239	9.19e-06	9411	A	G	7.71916e-05	0.000133712	0.56	463010
family.Pasteurellaceae.id.3689	rs4822728	22	26891808	0.00224269	21.1512	T	C	0.0685479	0.0149032	4.72e-06	9412	T	C	1.6291e-05	0.000135207	0.9	463010
family.Pasteurellaceae.id.3689	rs6092684	20	57274077	0.00231886	21.7643	A	T	0.0684647	0.014674	3.44e-06	9366	A	T	-0.000192447	0.000131355	0.14	463010
family.Pasteurellaceae.id.3689	rs6972479	7	116918060	0.00230179	19.8733	A	G	-0.0781862	0.0175366	7.75e-06	8616	A	G	0.000233325	0.000156326	0.14	463010
family.Pasteurellaceae.id.3689	rs9382510	6	55448491	0.0028527	26.915	C	T	-0.0881865	0.0169965	2.48e-07	9410	C	T	0.000177108	0.000154992	0.25	463010
family.Pasteurellaceae.id.3689	rs9938097	16	84977389	0.00214481	20.2045	T	C	-0.0710386	0.0158024	8.23e-06	9402	T	C	-6.54984e-06	0.000140707	0.96	463010
family.Peptococcaceae.id.2024	rs12144792	1	27418225	0.00193577	20.7839	C	T	0.064399	0.0141246	5.82e-06	10718	C	T	0.000332714	0.000133857	0.0129999	463010
family.Peptococcaceae.id.2024	rs12634826	3	182984048	0.00230955	24.0263	T	G	-0.0739885	0.0150931	1.01e-06	10381	T	G	-0.000321432	0.000142799	0.0239999	463010
family.Peptococcaceae.id.2024	rs12992764	2	188895743	0.00224521	23.4973	T	G	0.0684213	0.0141137	1.46e-06	10444	T	G	6.57613e-05	0.00013624	0.630001	463010
family.Peptococcaceae.id.2024	rs35703006	8	28614217	0.00227647	24.4435	G	T	0.0812655	0.0164355	4.95e-07	10715	G	T	-0.000191053	0.000162885	0.24	463010
family.Peptococcaceae.id.2024	rs75898026	13	113561082	0.00214242	22.4192	A	G	-0.0821779	0.0173541	2.02e-06	10444	A	G	-5.01135e-05	0.000167489	0.760001	463010
family.Peptostreptococcaceae.id.2042	rs10805326	4	14326193	0.0013248	21.3031	G	A	0.0566637	0.012276	4.03e-06	16061	G	A	-8.43131e-06	0.0001452	0.95	463010
family.Peptostreptococcaceae.id.2042	rs12986312	19	17414138	0.00128906	20.6103	T	G	0.0571818	0.0125947	5.77e-06	15970	T	G	-0.000133473	0.000142711	0.35	463010
family.Peptostreptococcaceae.id.2042	rs1520207	3	151781175	0.00135841	21.839	C	T	0.0525658	0.0112476	3.17e-06	16057	C	T	-0.000187165	0.000133017	0.16	463010
family.Peptostreptococcaceae.id.2042	rs2644627	8	26726641	0.00153947	24.7574	C	G	-0.0558506	0.011224	6.33e-07	16059	C	G	-8.32659e-05	0.000132289	0.53	463010
family.Peptostreptococcaceae.id.2042	rs4692811	4	171180190	0.0015911	25.5922	C	T	0.0642075	0.0126913	4.21e-07	16061	C	T	0.000171314	0.000148383	0.25	463010
family.Peptostreptococcaceae.id.2042	rs59865771	16	89246670	0.00126704	20.3466	C	T	-0.0573764	0.0127192	7.69e-06	16040	C	T	0.000207536	0.000152175	0.17	463010
family.Peptostreptococcaceae.id.2042	rs59987323	22	37976422	0.00141157	22.0262	C	T	-0.0537078	0.011443	2.7e-06	15584	C	T	0.000163315	0.000143026	0.25	463010
family.Peptostreptococcaceae.id.2042	rs6721459	2	67852836	0.00128903	20.7273	A	G	0.0509823	0.0111975	5.08e-06	16061	A	G	0.000323604	0.000131406	0.0140001	463010
family.Peptostreptococcaceae.id.2042	rs9573937	13	77351196	0.00146469	23.556	A	G	-0.0693637	0.0142907	1.71e-06	16061	A	G	3.12349e-05	0.000163812	0.85	463010
family.Porphyromonadaceae.id.943	rs10762312	10	71571863	0.00107641	19.4243	G	A	-0.052368	0.0118814	8.7e-06	18028	G	A	2.45527e-05	0.000151019	0.87	463010
family.Porphyromonadaceae.id.943	rs10858364	9	138076081	0.0011608	20.9489	G	T	0.055316	0.012085	4.31e-06	18028	G	T	-0.000140886	0.000159924	0.38	463010
family.Porphyromonadaceae.id.943	rs17065783	3	62035586	0.00129645	23.4002	A	G	-0.059133	0.0122235	1.79e-06	18028	A	G	-0.000167119	0.0001531	0.28	463010
family.Porphyromonadaceae.id.943	rs1980561	14	63386516	0.00109262	19.717	A	G	-0.0485289	0.0109284	8.95e-06	18028	A	G	-0.000126189	0.000136174	0.35	463010
family.Porphyromonadaceae.id.943	rs3111851	3	189854046	0.00127837	23.0683	C	G	0.0581896	0.0121147	2.19e-06	18024	C	G	5.1068e-05	0.000151576	0.74	463010
family.Porphyromonadaceae.id.943	rs35233670	17	63750903	0.0011058	19.9507	T	C	-0.0473576	0.010602	7.91e-06	18024	T	C	-4.05635e-05	0.000132469	0.760001	463010
family.Porphyromonadaceae.id.943	rs864093	4	149825977	0.00111863	20.1859	A	C	-0.0527939	0.0117499	9.6e-06	18027	A	C	0.000165605	0.000145544	0.26	463010
family.Prevotellaceae.id.960	rs12057990	1	99470269	0.00133601	19.8863	C	T	0.0589878	0.0132268	8.97e-06	14867	C	T	-9.42761e-05	0.000150082	0.53	463010
family.Prevotellaceae.id.960	rs12118202	1	210681370	0.00175056	26.0712	T	C	-0.0751986	0.0147265	5.54e-07	14869	T	C	5.02987e-05	0.000161043	0.75	463010
family.Prevotellaceae.id.960	rs13069367	3	71801830	0.0013668	20.3357	A	C	-0.0539768	0.0119687	7.39e-06	14860	A	C	2.8326e-05	0.00013796	0.84	463010
family.Prevotellaceae.id.960	rs2206482	20	9771109	0.00158207	23.4612	T	G	-0.0569105	0.0117486	1.3e-06	14808	T	G	5.93259e-05	0.000132061	0.649999	463010
family.Prevotellaceae.id.960	rs2278540	3	32408916	0.00135989	20.215	G	A	0.0554249	0.0123265	8.44e-06	14847	G	A	-0.000321074	0.00013916	0.021	463010
family.Prevotellaceae.id.960	rs3758087	8	23714609	0.00137565	20.4827	T	C	0.0564199	0.0124655	8.61e-06	14871	T	C	-0.000221063	0.000139217	0.11	463010
family.Prevotellaceae.id.960	rs4493272	2	118910912	0.00176419	26.271	T	C	-0.0604992	0.0118027	3.02e-07	14867	T	C	3.38681e-05	0.000134057	0.8	463010
family.Prevotellaceae.id.960	rs4685827	3	4864877	0.00146684	21.8366	T	C	-0.0679529	0.0145407	2.77e-06	14867	T	C	-1.98958e-05	0.000161873	0.9	463010
family.Prevotellaceae.id.960	rs7975087	12	21404832	0.00132403	19.713	C	A	-0.0601448	0.0135454	7.59e-06	14871	C	A	-5.89586e-06	0.000152545	0.97	463010
family.Prevotellaceae.id.960	rs9586501	13	105075823	0.00145513	21.6634	G	A	0.0592681	0.0127329	2.59e-06	14868	G	A	0.000172975	0.000142246	0.22	463010
family.Rhodospirillaceae.id.2717	rs11591293	10	113419797	0.00257258	21.9182	G	T	0.0743184	0.0158724	2.67e-06	8500	G	T	0.000196871	0.000134235	0.14	463010
family.Rhodospirillaceae.id.2717	rs12977163	19	28641647	0.0024788	19.984	G	C	0.0730951	0.0163491	7.63e-06	8044	G	C	-0.00010131	0.00013524	0.450001	463010
family.Rhodospirillaceae.id.2717	rs13336560	16	88554243	0.00245457	19.7045	C	T	-0.0701719	0.0158061	9.17e-06	8010	C	T	0.000184563	0.000137364	0.18	463010
family.Rhodospirillaceae.id.2717	rs4822789	22	27173098	0.00245826	20.9221	G	C	0.0734321	0.0160521	7.01e-06	8492	G	C	2.49099e-05	0.000138576	0.86	463010
family.Rhodospirillaceae.id.2717	rs55876211	3	84502332	0.00253147	21.5518	C	T	-0.0911851	0.0196395	2.87e-06	8494	C	T	-0.00014701	0.000163399	0.37	463010
family.Rhodospirillaceae.id.2717	rs72714493	1	92206218	0.00239679	20.4097	A	G	0.0816858	0.0180791	7.35e-06	8497	A	G	-0.000168529	0.000151524	0.27	463010
family.Rhodospirillaceae.id.2717	rs9813022	3	13726736	0.00311125	26.5156	A	G	-0.0842444	0.0163583	2.53e-07	8498	A	G	-9.31893e-05	0.000143627	0.52	463010
family.Rikenellaceae.id.967	rs10832801	11	17589129	0.0011038	19.003	A	C	-0.0534763	0.0122666	7.5e-06	17199	A	C	-0.000164914	0.000148283	0.27	463010
family.Rikenellaceae.id.967	rs2447496	8	99188924	0.00117872	20.2944	G	A	-0.0549203	0.0121904	6.09e-06	17199	G	A	-8.35357e-05	0.000153565	0.59	463010
family.Rikenellaceae.id.967	rs4264350	15	71658642	0.0013291	23.5111	T	C	-0.0526393	0.0108555	1.35e-06	17668	T	C	0.000192781	0.000133295	0.15	463010
family.Rikenellaceae.id.967	rs4783173	16	85396629	0.00112011	19.1574	C	G	0.0481514	0.0110006	7.06e-06	17086	C	G	0.000108768	0.000132969	0.41	463010
family.Rikenellaceae.id.967	rs59663348	18	4069710	0.00117774	20.8422	G	A	0.0570915	0.0125048	6.12e-06	17678	G	A	-1.32156e-05	0.000163184	0.94	463010
family.Rikenellaceae.id.967	rs62532512	9	14158854	0.00124587	22.042	C	A	-0.0504257	0.0107399	2.76e-06	17672	C	A	-6.60063e-05	0.000132891	0.62	463010
family.Rikenellaceae.id.967	rs67281112	7	135778919	0.00124256	21.395	G	C	0.0635814	0.0137451	3.63e-06	17199	G	C	-0.000109411	0.000158513	0.49	463010
family.Rikenellaceae.id.967	rs67705352	1	19790706	0.00139718	24.7282	T	G	-0.0549688	0.0110534	6.58e-07	17676	T	G	-8.88761e-05	0.000136507	0.51	463010
family.Rikenellaceae.id.967	rs6837275	4	187842232	0.00133679	23.0195	A	G	0.0570355	0.011887	1.45e-06	17199	A	G	-0.000155345	0.000146957	0.29	463010
family.Rikenellaceae.id.967	rs7242694	18	10338470	0.00122174	21.036	C	T	-0.0618674	0.0134882	5.81e-06	17199	C	T	-0.000188077	0.000167286	0.26	463010
family.Ruminococcaceae.id.2050	rs10093275	8	69732887	0.00114186	20.9576	C	T	0.0534595	0.011677	5.35e-06	18335	C	T	-0.000137644	0.000144302	0.34	463010
family.Ruminococcaceae.id.2050	rs10166469	2	29829167	0.00107378	19.6843	T	C	-0.053336	0.0120209	8.52e-06	18314	T	C	-7.74514e-05	0.000151044	0.61	463010
family.Ruminococcaceae.id.2050	rs1158100	8	4555684	0.00108624	19.9335	A	G	-0.0490539	0.0109865	8.61e-06	18333	A	G	-0.000170488	0.000135984	0.21	463010
family.Ruminococcaceae.id.2050	rs2426816	20	58278102	0.00115284	20.5118	T	A	-0.0480152	0.0106011	6.04e-06	17774	T	A	0.00024305	0.000131426	0.064	463010
family.Veillonellaceae.id.2172	rs11700976	21	35576123	0.00122419	19.5731	C	A	0.0503337	0.0113763	9.25e-06	15971	C	A	1.46533e-05	0.000131858	0.91	463010
family.Veillonellaceae.id.2172	rs12668619	7	21637810	0.00138141	22.0902	A	G	0.055301	0.0117654	2.57e-06	15971	A	G	-9.18885e-06	0.000136538	0.95	463010
family.Veillonellaceae.id.2172	rs12741784	1	50088819	0.00170822	27.1473	C	T	-0.0621452	0.0119266	1.28e-07	15867	C	T	-1.4115e-05	0.000135892	0.92	463010
family.Veillonellaceae.id.2172	rs1442060	4	46366067	0.00131379	21.0141	G	A	-0.0514024	0.0112125	4.51e-06	15976	G	A	0.000166905	0.000132974	0.21	463010
family.Veillonellaceae.id.2172	rs1447205	8	41231597	0.00126748	20.266	G	C	-0.0520689	0.0115656	7.35e-06	15971	G	C	-4.32151e-05	0.000134588	0.75	463010
family.Veillonellaceae.id.2172	rs2175069	4	23317124	0.00131412	21.0194	A	G	-0.0526752	0.0114886	4.64e-06	15976	A	G	1.32033e-05	0.000135106	0.92	463010
family.Veillonellaceae.id.2172	rs4263802	8	138319508	0.00122843	19.647	G	A	0.050942	0.0114921	7.45e-06	15976	G	A	3.18805e-05	0.000133795	0.81	463010
family.Veillonellaceae.id.2172	rs4461038	15	78546996	0.00134915	21.5764	A	G	-0.0554965	0.0119467	3.73e-06	15973	A	G	3.49561e-05	0.000136629	0.8	463010
family.Veillonellaceae.id.2172	rs4797169	18	462180	0.00131233	20.9881	T	C	0.0587799	0.0128297	4.49e-06	15974	T	C	4.33049e-05	0.000153029	0.780001	463010
family.Veillonellaceae.id.2172	rs6692542	1	244391618	0.00127666	20.4195	A	G	0.0534397	0.0118254	8.68e-06	15976	A	G	0.000152431	0.000137267	0.27	463010
family.Veillonellaceae.id.2172	rs6909981	6	75534152	0.00126891	20.2953	C	T	-0.0638697	0.0141765	5.48e-06	15976	C	T	2.97929e-06	0.000160081	0.99	463010
family.Veillonellaceae.id.2172	rs9345168	6	92380922	0.00126326	20.2049	C	A	0.0509102	0.0113253	8.49e-06	15976	C	A	6.09534e-06	0.000131427	0.96	463010
family.Verrucomicrobiaceae.id.4036	rs11184341	1	105422565	0.00178603	21.2238	G	C	0.0655301	0.014223	4.14e-06	11864	G	C	1.88887e-05	0.000147416	0.9	463010
family.Verrucomicrobiaceae.id.4036	rs11729256	4	95027272	0.00209725	24.9235	T	C	0.0749798	0.0150177	6.73e-07	11861	T	C	-0.000105438	0.000149962	0.48	463010
family.Verrucomicrobiaceae.id.4036	rs12908520	15	97570657	0.00188075	22.3496	G	A	0.0619104	0.0130946	2.15e-06	11863	G	A	3.14005e-05	0.000132453	0.81	463010
family.Verrucomicrobiaceae.id.4036	rs2602429	16	81063149	0.001945	22.7775	C	T	0.0745516	0.0156195	2.7e-06	11690	C	T	-4.51029e-05	0.000159912	0.780001	463010
family.Verrucomicrobiaceae.id.4036	rs4242783	10	5064327	0.00185278	21.6955	G	A	0.0687992	0.0147694	2.75e-06	11690	G	A	-0.000107276	0.000149522	0.47	463010
family.Verrucomicrobiaceae.id.4036	rs4936098	11	130280667	0.00191696	22.7711	A	G	0.0648691	0.0135928	1.13e-06	11858	A	G	-0.000179266	0.000136253	0.19	463010
family.Verrucomicrobiaceae.id.4036	rs9349825	6	56341481	0.00192904	22.9149	A	G	-0.0704354	0.0147128	2.51e-06	11858	A	G	-0.000267094	0.000149171	0.0729995	463010
family.Verrucomicrobiaceae.id.4036	rs941682	20	31867840	0.00163132	19.2925	G	A	-0.0631526	0.0143767	9.58e-06	11809	G	A	-0.000129652	0.000147027	0.38	463010
genus..Clostridiuminnocuumgroup.id.14397	rs10074000	5	113126539	0.00500366	20.3466	T	C	-0.102648	0.0227508	7e-06	4048	T	C	-0.000114116	0.000134575	0.4	463010
genus..Clostridiuminnocuumgroup.id.14397	rs10506058	12	30268485	0.00482514	20.1748	A	G	0.0997048	0.0221926	8.92e-06	4163	A	G	3.01392e-06	0.000133593	0.98	463010
genus..Clostridiuminnocuumgroup.id.14397	rs1948423	3	103025517	0.00515834	21.5855	T	A	-0.108859	0.023425	3.49e-06	4165	T	A	-8.69965e-05	0.000144459	0.55	463010
genus..Clostridiuminnocuumgroup.id.14397	rs6890185	5	71186626	0.00564942	23.6579	T	C	0.113424	0.0233137	1.12e-06	4166	T	C	-0.00015843	0.000139586	0.26	463010
genus..Clostridiuminnocuumgroup.id.14397	rs71564433	6	143718234	0.00508817	21.2853	T	A	-0.126746	0.0274657	7.8e-06	4164	T	A	-5.11753e-05	0.000166575	0.760001	463010
genus..Clostridiuminnocuumgroup.id.14397	rs77845139	15	59704208	0.00491436	19.9817	A	G	-0.114993	0.0257186	8.41e-06	4048	A	G	1.38496e-05	0.000151155	0.93	463010
genus..Eubacteriumbrachygroup.id.11296	rs12151423	2	218237281	0.00512893	19.8585	A	G	0.101329	0.0227324	9.27e-06	3854	A	G	-6.66039e-05	0.000131998	0.61	463010
genus..Eubacteriumbrachygroup.id.11296	rs1384962	14	23060552	0.00512557	20.6028	A	G	0.120888	0.0266264	6.99e-06	4001	A	G	0.000263707	0.00015767	0.0940005	463010
genus..Eubacteriumbrachygroup.id.11296	rs2913110	10	22892667	0.00522224	20.9934	C	T	0.105143	0.022942	4.56e-06	4001	C	T	6.5778e-05	0.000133192	0.62	463010
genus..Eubacteriumbrachygroup.id.11296	rs4862235	4	184628931	0.00535945	21.5425	G	A	0.104806	0.0225751	3.73e-06	4000	G	A	-3.7307e-05	0.000133121	0.780001	463010
genus..Eubacteriumbrachygroup.id.11296	rs6591893	11	80236833	0.00504586	20.2706	G	A	0.108225	0.0240319	7.34e-06	3999	G	A	0.000207764	0.000141993	0.14	463010
genus..Eubacteriumbrachygroup.id.11296	rs720439	22	48190598	0.00493551	19.835	A	G	-0.111927	0.0251252	7.03e-06	4001	A	G	0.00022239	0.000151617	0.14	463010
genus..Eubacteriumcoprostanoligenesgroup.id.11375	rs1020520	7	33603146	0.00113549	19.7448	T	G	-0.0590705	0.0132929	8.89e-06	17371	T	G	7.38938e-05	0.000166068	0.66	463010
genus..Eubacteriumcoprostanoligenesgroup.id.11375	rs10444197	10	2215931	0.00114236	19.8745	A	G	-0.0505823	0.0113455	5.98e-06	17380	A	G	0.000206618	0.000139747	0.14	463010
genus..Eubacteriumcoprostanoligenesgroup.id.11375	rs11052069	12	32713919	0.00112851	19.6333	T	C	0.0477832	0.0107833	9.38e-06	17380	T	C	-0.000184171	0.000132035	0.16	463010
genus..Eubacteriumcoprostanoligenesgroup.id.11375	rs12906958	15	36911598	0.00121537	21.1464	C	T	-0.0533159	0.0115935	4.35e-06	17380	C	T	-3.80929e-05	0.000141546	0.79	463010
genus..Eubacteriumcoprostanoligenesgroup.id.11375	rs2644213	10	84506096	0.00113517	19.7494	G	A	0.0538845	0.0121245	9.86e-06	17380	G	A	3.96395e-05	0.000154719	0.8	463010
genus..Eubacteriumcoprostanoligenesgroup.id.11375	rs4076415	15	86440997	0.00128464	21.8129	T	G	0.0515152	0.0110294	1.99e-06	16960	T	G	0.000186515	0.000134567	0.17	463010
genus..Eubacteriumcoprostanoligenesgroup.id.11375	rs6762473	3	127139574	0.00123871	21.5493	C	A	0.0521584	0.0112353	4.26e-06	17377	C	A	-0.000280146	0.000137971	0.0420001	463010
genus..Eubacteriumcoprostanoligenesgroup.id.11375	rs79895140	2	50797401	0.00127623	20.6208	T	C	-0.0641017	0.0141153	8.62e-06	16139	T	C	0.000233958	0.000169824	0.17	463010
genus..Eubacteriumeligensgroup.id.14372	rs265534	10	83092007	0.00148832	22.0212	T	G	-0.0563756	0.0120127	2.27e-06	14776	T	G	8.5493e-05	0.000132598	0.52	463010
genus..Eubacteriumeligensgroup.id.14372	rs4583233	16	81820486	0.00190627	27.3595	A	C	0.0670205	0.0128122	2.84e-07	14327	A	C	-1.38301e-05	0.000137955	0.92	463010
genus..Eubacteriumfissicatenagroup.id.14373	rs11818408	10	96758467	0.00552041	19.9172	G	A	0.10585	0.0237114	8.2e-06	3590	G	A	0.000261698	0.000132626	0.0479999	463010
genus..Eubacteriumfissicatenagroup.id.14373	rs11876297	18	45753272	0.00637228	21.7662	T	C	0.131469	0.0281712	2.67e-06	3396	T	C	4.67114e-05	0.000155286	0.760001	463010
genus..Eubacteriumfissicatenagroup.id.14373	rs2733072	8	5433699	0.00598126	23.0521	G	A	0.109644	0.0228306	1.49e-06	3833	G	A	-0.000400288	0.000134529	0.00290001	463010
genus..Eubacteriumfissicatenagroup.id.14373	rs3771393	2	71145246	0.00630853	24.0611	C	T	0.130842	0.0266671	7.38e-07	3792	C	T	-6.45099e-05	0.000148442	0.66	463010
genus..Eubacteriumfissicatenagroup.id.14373	rs6934739	6	39940437	0.00504941	19.4323	A	G	0.111463	0.0252788	9.75e-06	3831	A	G	0.000192164	0.000145537	0.19	463010
genus..Eubacteriumnodatumgroup.id.11297	rs11006576	10	61322015	0.00605327	20.0548	A	G	-0.110167	0.024593	7.99e-06	3295	A	G	1.62978e-05	0.000132539	0.9	463010
genus..Eubacteriumnodatumgroup.id.11297	rs6818880	4	94712747	0.00604942	20.0176	A	G	-0.110081	0.0245964	7.83e-06	3291	A	G	-0.000166763	0.000132615	0.21	463010
genus..Eubacteriumnodatumgroup.id.11297	rs7827125	8	4954912	0.00612996	20.3043	C	T	0.1223	0.0271331	7.17e-06	3294	C	T	8.91585e-05	0.000146576	0.54	463010
genus..Eubacteriumnodatumgroup.id.11297	rs7880204	1	171060821	0.00626459	20.753	T	C	-0.125454	0.0275303	6.84e-06	3294	T	C	-2.37132e-05	0.000148654	0.87	463010
genus..Eubacteriumnodatumgroup.id.11297	rs9425984	1	34529736	0.00598852	19.833	T	C	-0.130234	0.0292347	7.21e-06	3294	T	C	-5.31393e-05	0.000155287	0.73	463010
genus..Eubacteriumoxidoreducensgroup.id.11339	rs12129908	1	195064019	0.0037584	20.2776	C	A	0.0893272	0.0198333	5.8e-06	5377	C	A	-4.47125e-05	0.000132839	0.74	463010
genus..Eubacteriumoxidoreducensgroup.id.11339	rs1425962	4	187905399	0.00381932	20.3928	G	C	0.0906104	0.0200612	7.32e-06	5321	G	C	2.93787e-05	0.000143708	0.84	463010
genus..Eubacteriumoxidoreducensgroup.id.11339	rs2973294	4	37526679	0.00413511	22.3227	G	T	0.0923559	0.0195439	2.39e-06	5378	G	T	-0.000146837	0.000131858	0.27	463010
genus..Eubacteriumoxidoreducensgroup.id.11339	rs440215	5	106882394	0.00422464	22.8038	C	T	0.0932766	0.0195294	1.65e-06	5377	C	T	-0.000111548	0.000132147	0.4	463010
genus..Eubacteriumrectalegroup.id.14374	rs10248854	7	121281238	0.00124589	21.6382	C	A	-0.0527827	0.0113463	4.21e-06	17348	C	A	8.59581e-05	0.000137427	0.53	463010
genus..Eubacteriumrectalegroup.id.14374	rs10797540	1	234530370	0.0012406	21.5487	A	G	0.0503179	0.0108389	3.53e-06	17350	A	G	7.20919e-05	0.000132414	0.59	463010
genus..Eubacteriumrectalegroup.id.14374	rs10892089	11	98538560	0.001185	20.5829	C	G	-0.0635522	0.0140072	6.22e-06	17351	C	G	0.000147905	0.000163815	0.37	463010
genus..Eubacteriumrectalegroup.id.14374	rs314726	2	125553155	0.00137318	23.3266	T	C	0.0528824	0.0109486	1.38e-06	16966	T	C	-5.13394e-05	0.000133283	0.7	463010
genus..Eubacteriumrectalegroup.id.14374	rs59427698	9	129425745	0.00116513	19.3765	A	G	-0.0576035	0.0130853	5.37e-06	16613	A	G	9.96095e-05	0.000153523	0.52	463010
genus..Eubacteriumrectalegroup.id.14374	rs62547233	9	92013419	0.00114633	19.9059	A	G	0.0536319	0.0120201	9.9e-06	17347	A	G	4.81711e-05	0.000145353	0.74	463010
genus..Eubacteriumruminantiumgroup.id.11340	rs10923018	1	88523399	0.0026262	20.3724	G	A	0.0726438	0.0160924	6.8e-06	7739	G	A	-2.99602e-05	0.000132065	0.82	463010
genus..Eubacteriumruminantiumgroup.id.11340	rs11637981	15	61289622	0.00267913	20.7277	G	T	-0.073258	0.0160888	5.44e-06	7718	G	T	-0.000357144	0.000132517	0.00700003	463010
genus..Eubacteriumruminantiumgroup.id.11340	rs13025464	2	201610645	0.00261042	20.247	T	C	-0.0737077	0.0163786	6.97e-06	7738	T	C	-0.000115473	0.000135938	0.4	463010
genus..Eubacteriumruminantiumgroup.id.11340	rs139749	22	25303055	0.00330046	24.2129	C	T	-0.0845439	0.0171791	8.59e-07	7314	C	T	0.000107985	0.000139695	0.44	463010
genus..Eubacteriumruminantiumgroup.id.11340	rs2116427	5	121182996	0.00321784	24.9768	A	G	0.0911461	0.0182353	4.67e-07	7739	A	G	-0.000192319	0.000152292	0.21	463010
genus..Eubacteriumruminantiumgroup.id.11340	rs2418654	2	71247578	0.00277984	20.3829	C	T	-0.0748879	0.0165852	6.17e-06	7314	C	T	-0.000136561	0.000133624	0.31	463010
genus..Eubacteriumruminantiumgroup.id.11340	rs2817174	1	3044181	0.00260339	20.1193	C	T	-0.0734306	0.0163687	7.87e-06	7710	C	T	-7.75516e-05	0.000135428	0.57	463010
genus..Eubacteriumruminantiumgroup.id.11340	rs606117	9	2539358	0.00292357	21.2903	A	G	0.0833243	0.018056	4.82e-06	7263	A	G	0.000216433	0.000142669	0.13	463010
genus..Eubacteriumruminantiumgroup.id.11340	rs6676699	1	197978281	0.00264462	20.4335	G	T	-0.0888124	0.0196447	6.38e-06	7708	G	T	-0.000136431	0.000164181	0.41	463010
genus..Eubacteriumruminantiumgroup.id.11340	rs7000472	8	138626268	0.00274268	21.2785	A	G	-0.0762282	0.016523	4.07e-06	7739	A	G	-6.41971e-05	0.000135005	0.630001	463010
genus..Eubacteriumventriosumgroup.id.11341	rs12964517	18	22460785	0.00147755	22.6207	G	A	0.0587198	0.0123453	2.07e-06	15289	G	A	-1.41493e-05	0.000140295	0.92	463010
genus..Eubacteriumventriosumgroup.id.11341	rs35179274	14	51960625	0.00135243	20.6999	C	T	-0.0627263	0.013786	5.76e-06	15287	C	T	8.06348e-05	0.000155231	0.6	463010
genus..Eubacteriumventriosumgroup.id.11341	rs3809430	14	44975510	0.00139962	21.4232	T	C	-0.0548171	0.0118426	3.55e-06	15287	T	C	2.97651e-05	0.00013496	0.83	463010
genus..Eubacteriumventriosumgroup.id.11341	rs57199565	3	190223732	0.0015998	23.8929	T	C	0.0783394	0.0160257	7.97e-07	14913	T	C	0.00015657	0.000185519	0.4	463010
genus..Eubacteriumventriosumgroup.id.11341	rs6048195	20	2308307	0.00180324	26.803	A	T	-0.0603594	0.011658	2.5e-07	14839	A	T	8.74117e-05	0.000146139	0.55	463010
genus..Eubacteriumventriosumgroup.id.11341	rs66830358	3	171895485	0.00134522	20.0857	T	A	0.0528752	0.0117972	6.87e-06	14913	T	A	-8.2078e-05	0.000133908	0.54	463010
genus..Eubacteriumventriosumgroup.id.11341	rs72783037	16	60348381	0.00137273	21.0097	C	A	0.0658926	0.0143747	6.55e-06	15286	C	A	-6.49354e-05	0.000163727	0.69	463010
genus..Eubacteriumventriosumgroup.id.11341	rs876734	12	52423996	0.00145919	21.7898	C	T	-0.0618696	0.0132532	2.89e-06	14913	C	T	-6.41719e-05	0.000152659	0.67	463010
genus..Eubacteriumxylanophilumgroup.id.14375	rs10140184	14	73181783	0.00161834	20.9558	A	C	0.0576795	0.012599	4.96e-06	12930	A	C	6.07864e-05	0.000140261	0.66	463010
genus..Eubacteriumxylanophilumgroup.id.14375	rs10917203	1	22627266	0.00169074	21.8949	A	C	0.0612633	0.0130917	3.15e-06	12930	A	C	0.000114965	0.000140047	0.41	463010
genus..Eubacteriumxylanophilumgroup.id.14375	rs13239072	7	43566344	0.00174019	23.1936	G	A	0.0687427	0.0142728	1.82e-06	13307	G	A	4.89221e-05	0.000149528	0.74	463010
genus..Eubacteriumxylanophilumgroup.id.14375	rs2012708	16	84790559	0.0015309	20.3983	A	G	0.0573202	0.0126905	6.53e-06	13306	A	G	3.67085e-05	0.00013728	0.79	463010
genus..Eubacteriumxylanophilumgroup.id.14375	rs4654122	1	246780557	0.00150486	20.0554	C	G	0.0553508	0.0123588	7.2e-06	13309	C	G	-0.000207118	0.000132188	0.12	463010
genus..Ruminococcusgauvreauiigroup.id.11342	rs10931481	2	191954852	0.00163098	21.8582	G	A	0.0610096	0.0130484	3.38e-06	13382	G	A	1.78052e-05	0.000141612	0.9	463010
genus..Ruminococcusgauvreauiigroup.id.11342	rs13188803	5	112627773	0.00159131	20.4522	T	A	0.0709419	0.0156855	7.28e-06	12834	T	A	0.00017691	0.000162594	0.28	463010
genus..Ruminococcusgauvreauiigroup.id.11342	rs1391597	12	61119266	0.001667	22.3417	C	T	0.0590284	0.0124874	1.86e-06	13382	C	T	5.51134e-07	0.000134777	1	463010
genus..Ruminococcusgauvreauiigroup.id.11342	rs2047242	10	29201860	0.00190764	25.5481	A	G	-0.067603	0.0133738	2.46e-07	13369	A	G	-0.000142305	0.000140125	0.31	463010
genus..Ruminococcusgauvreauiigroup.id.11342	rs2105937	1	20552072	0.00153982	20.6069	A	G	0.0580215	0.0127806	5.1e-06	13364	A	G	-8.91025e-05	0.000136909	0.52	463010
genus..Ruminococcusgauvreauiigroup.id.11342	rs2166943	8	137090850	0.00157316	21.0742	A	C	0.0566974	0.0123497	5.28e-06	13377	A	C	-0.000209581	0.00013301	0.12	463010
genus..Ruminococcusgauvreauiigroup.id.11342	rs289410	15	85563483	0.00165405	22.1645	G	A	-0.0654926	0.0139101	2.27e-06	13380	G	A	0.000214542	0.000151009	0.16	463010
genus..Ruminococcusgauvreauiigroup.id.11342	rs9870933	3	112372317	0.00181358	24.3098	A	G	0.0621643	0.0126072	8.49e-07	13382	A	G	2.36384e-05	0.000136163	0.86	463010
genus..Ruminococcusgnavusgroup.id.14376	rs12136548	1	115168097	0.00328146	21.0672	C	T	0.0901946	0.0196476	3.1e-06	6401	C	T	-0.000220365	0.000141447	0.12	463010
genus..Ruminococcusgnavusgroup.id.14376	rs12989336	2	36259341	0.00316213	20.2987	G	A	-0.0846861	0.0187936	7.12e-06	6401	G	A	-0.000304501	0.000139492	0.0290001	463010
genus..Ruminococcusgnavusgroup.id.14376	rs2909242	8	129224680	0.00382663	24.5807	C	A	-0.0909965	0.018351	7.41e-07	6401	C	A	0.000163775	0.000137832	0.23	463010
genus..Ruminococcusgnavusgroup.id.14376	rs4388134	4	190110710	0.00307982	19.7625	C	T	-0.0904997	0.0203544	9.12e-06	6399	C	T	-9.10088e-05	0.000156648	0.56	463010
genus..Ruminococcusgnavusgroup.id.14376	rs9872758	3	66701616	0.00359956	23.106	T	C	0.0849233	0.0176643	1.66e-06	6398	T	C	0.000195905	0.000130855	0.13	463010
genus..Ruminococcustorquesgroup.id.14377	rs10967781	9	27225258	0.00112822	20.0927	C	A	0.0507994	0.0113322	8.37e-06	17791	C	A	0.000275432	0.000138231	0.0460002	463010
genus..Ruminococcustorquesgroup.id.14377	rs13154778	5	56952803	0.00106192	18.9149	T	A	0.0563358	0.0129526	7.16e-06	17795	T	A	-0.000311636	0.000166052	0.061	463010
genus..Ruminococcustorquesgroup.id.14377	rs1475330	6	67262102	0.00112906	19.6125	T	C	0.0523492	0.01182	8.13e-06	17353	T	C	-0.000112456	0.000145717	0.44	463010
genus..Ruminococcustorquesgroup.id.14377	rs35866622	19	49218060	0.00181138	31.2812	T	C	-0.0612024	0.0109421	2.21e-08	17240	T	C	0.000216425	0.000131469	0.1	463010
genus..Ruminococcustorquesgroup.id.14377	rs8080469	17	14532347	0.0011796	21.0169	G	A	0.0490727	0.0107036	3.5e-06	17798	G	A	4.8849e-05	0.00013147	0.709999	463010
genus..Ruminococcustorquesgroup.id.14377	rs8141465	22	21358653	0.00112422	20.0212	A	G	0.0480778	0.0107442	9.65e-06	17791	A	G	-6.00139e-05	0.00013128	0.649999	463010
genus.Adlercreutzia.id.812	rs55719207	3	105355971	0.00236934	19.5721	G	A	-0.0699243	0.0158036	9.61e-06	8243	G	A	-0.000126836	0.000132435	0.34	463010
genus.Adlercreutzia.id.812	rs7680684	4	171281359	0.00294783	24.3649	C	T	-0.083381	0.0168901	9.77e-07	8243	C	T	3.8974e-05	0.000143951	0.79	463010
genus.Adlercreutzia.id.812	rs9490822	6	123909083	0.00268949	22.2238	C	T	-0.0734512	0.0155789	2.54e-06	8243	C	T	6.82376e-05	0.000132712	0.61	463010
genus.Adlercreutzia.id.812	rs9915817	17	48864179	0.00239754	19.8056	T	C	0.0749219	0.016833	8.22e-06	8243	T	C	0.000142776	0.000141683	0.31	463010
genus.Akkermansia.id.4037	rs11184341	1	105422565	0.00178905	21.2579	G	C	0.0655855	0.0142236	4.06e-06	11863	G	C	1.88887e-05	0.000147416	0.9	463010
genus.Akkermansia.id.4037	rs11729256	4	95027272	0.00210099	24.966	T	C	0.0750473	0.0150184	6.58e-07	11860	T	C	-0.000105438	0.000149962	0.48	463010
genus.Akkermansia.id.4037	rs12908520	15	97570657	0.0018723	22.2471	G	A	0.061772	0.0130954	2.26e-06	11862	G	A	3.14005e-05	0.000132453	0.81	463010
genus.Akkermansia.id.4037	rs2602429	16	81063149	0.00194416	22.7656	C	T	0.0745352	0.0156201	2.72e-06	11689	C	T	-4.51029e-05	0.000159912	0.780001	463010
genus.Akkermansia.id.4037	rs4242783	10	5064327	0.00183914	21.5336	G	A	0.0685454	0.0147701	3e-06	11689	G	A	-0.000107276	0.000149522	0.47	463010
genus.Akkermansia.id.4037	rs4936098	11	130280667	0.00192011	22.8067	A	G	0.0649225	0.0135934	1.1e-06	11857	A	G	-0.000179266	0.000136253	0.19	463010
genus.Akkermansia.id.4037	rs9349825	6	56341481	0.0019239	22.8518	A	G	-0.0703407	0.0147133	2.6e-06	11857	A	G	-0.000267094	0.000149171	0.0729995	463010
genus.Akkermansia.id.4037	rs941682	20	31867840	0.00163864	19.3775	G	A	-0.0632957	0.0143777	9.17e-06	11808	G	A	-0.000129652	0.000147027	0.38	463010
genus.Alistipes.id.968	rs11769002	7	62443498	0.00132817	23.3657	G	A	-0.0528793	0.0109389	1.45e-06	17571	G	A	-0.000176702	0.000134345	0.19	463010
genus.Alistipes.id.968	rs1689282	9	14080129	0.00121751	20.8301	A	C	-0.0520061	0.0113942	5.28e-06	17090	A	C	-0.000214631	0.000139311	0.12	463010
genus.Alistipes.id.968	rs2875322	11	130887552	0.00111779	19.5351	T	C	-0.0580945	0.0131432	8.78e-06	17459	T	C	-0.000577232	0.000162299	0.000379997	463010
genus.Alistipes.id.968	rs34417064	17	52776479	0.00115653	20.3414	A	G	-0.048202	0.0106868	7.01e-06	17570	A	G	4.98143e-05	0.000131213	0.7	463010
genus.Alistipes.id.968	rs62576416	9	112120264	0.00114624	20.1534	T	C	0.0492647	0.0109733	7.5e-06	17564	T	C	-0.00013955	0.000134564	0.3	463010
genus.Alistipes.id.968	rs67281112	7	135778919	0.00123851	21.1898	G	C	0.0634575	0.0137846	3.92e-06	17090	G	C	-0.000109411	0.000158513	0.49	463010
genus.Alistipes.id.968	rs67705352	1	19790706	0.00131109	23.0596	T	G	-0.0532404	0.0110864	1.65e-06	17567	T	G	-8.88761e-05	0.000136507	0.51	463010
genus.Alistipes.id.968	rs7129639	11	17511427	0.00130433	22.9458	C	A	-0.0524955	0.0109584	1.78e-06	17571	C	A	-1.65996e-06	0.000135594	0.99	463010
genus.Alistipes.id.968	rs8130320	21	40580258	0.00118841	20.904	A	G	-0.049002	0.010717	4.84e-06	17571	A	G	-0.000190919	0.000132085	0.15	463010
genus.Allisonella.id.2174	rs1901739	5	114286707	0.00670486	21.6679	T	G	0.115769	0.0248626	3.59e-06	3212	T	G	-3.89105e-05	0.00013215	0.77	463010
genus.Allisonella.id.2174	rs35778461	9	100150556	0.007527	24.3449	C	T	0.146679	0.0297186	1.21e-06	3212	C	T	-7.50687e-05	0.00016634	0.649999	463010
genus.Allisonella.id.2174	rs594561	11	88632972	0.00615272	19.8725	C	T	0.112231	0.0251681	9.41e-06	3212	C	T	0.000259741	0.000131898	0.0490004	463010
genus.Allisonella.id.2174	rs602075	9	79110160	0.00997858	32.3541	A	G	0.168974	0.0296976	3.57e-08	3212	A	G	3.12498e-05	0.000149721	0.83	463010
genus.Allisonella.id.2174	rs6742198	2	33607071	0.00693158	22.1963	G	A	0.149152	0.0316484	3.35e-06	3182	G	A	-0.000172736	0.000162228	0.29	463010
genus.Alloprevotella.id.961	rs12675596	8	69994816	0.00827981	25.0969	G	T	0.145669	0.0290678	9.64e-07	3008	G	T	-0.000100352	0.000152381	0.51	463010
genus.Alloprevotella.id.961	rs17380632	3	79794395	0.00661972	20.0381	A	T	0.125564	0.0280409	9.27e-06	3009	A	T	-0.000104239	0.00014454	0.47	463010
genus.Alloprevotella.id.961	rs2154444	21	36053643	0.00660881	20.0049	T	G	0.138234	0.0308961	8.37e-06	3009	T	G	-0.000199093	0.000164985	0.23	463010
genus.Alloprevotella.id.961	rs34619204	21	40993008	0.00678943	20.5144	G	A	-0.156037	0.0344392	8.84e-06	3003	G	A	-0.000105351	0.000165275	0.52	463010
genus.Alloprevotella.id.961	rs4364940	1	234126516	0.00662695	20.0535	A	G	0.126418	0.0282207	8.58e-06	3008	A	G	-1.16092e-05	0.00014861	0.94	463010
genus.Alloprevotella.id.961	rs4680035	3	152805600	0.00701735	21.2361	A	G	-0.119599	0.0259446	4.99e-06	3007	A	G	-4.84522e-05	0.000131898	0.709999	463010
genus.Anaerofilum.id.2053	rs10794359	11	1051715	0.00450395	22.5854	T	C	-0.0953524	0.02006	2.23e-06	4994	T	C	-0.000251886	0.000134159	0.0599998	463010
genus.Anaerofilum.id.2053	rs1563175	2	3838940	0.00411757	20.8755	A	C	0.0923834	0.0202157	5.54e-06	5051	A	C	-0.000119107	0.000133296	0.37	463010
genus.Anaerofilum.id.2053	rs17012738	2	76698142	0.00401378	20.3472	T	G	0.0903417	0.0200239	7.24e-06	5051	T	G	0.000131294	0.000132226	0.32	463010
genus.Anaerofilum.id.2053	rs4506496	1	247145690	0.00473034	23.4457	G	A	0.10309	0.0212861	1.49e-06	4935	G	A	9.2051e-05	0.000139535	0.51	463010
genus.Anaerofilum.id.2053	rs712981	3	129686434	0.00485854	24.6505	A	C	0.10076	0.0202902	6.83e-07	5051	A	C	-0.000124003	0.000134095	0.36	463010
genus.Anaerofilum.id.2053	rs816292	12	117811409	0.00521241	26.2772	T	C	-0.113003	0.02204	2.64e-07	5017	T	C	0.000251164	0.000149421	0.0929994	463010
genus.Anaerostipes.id.1991	rs2014785	3	171100102	0.00128294	21.1224	T	C	0.0515687	0.0112199	4.68e-06	16445	T	C	0.000249044	0.000137561	0.0700003	463010
genus.Anaerostipes.id.1991	rs2396460	2	228018671	0.00129307	21.8941	T	C	-0.0512653	0.0109555	2.91e-06	16912	T	C	1.32823e-05	0.000133147	0.92	463010
genus.Anaerostipes.id.1991	rs2804244	10	117383184	0.00135007	22.8795	A	G	-0.053089	0.0110983	2.04e-06	16926	A	G	-1.52904e-05	0.000131424	0.91	463010
genus.Anaerostipes.id.1991	rs60983350	17	2850737	0.00131065	21.4468	G	A	-0.0539901	0.0116575	4.42e-06	16344	G	A	0.000222396	0.00014972	0.14	463010
genus.Anaerostipes.id.1991	rs62215703	21	25873624	0.00142946	22.2571	G	A	0.0644965	0.0136702	1.98e-06	15550	G	A	-7.74529e-05	0.000162339	0.630001	463010
genus.Anaerostipes.id.1991	rs6474958	9	1582701	0.00117693	19.9324	A	G	-0.0500065	0.0112001	6.74e-06	16918	A	G	-9.61598e-05	0.000133166	0.47	463010
genus.Anaerostipes.id.1991	rs6854026	4	169690814	0.00128267	21.7294	T	C	-0.0508482	0.0109075	3.2e-06	16921	T	C	-9.06133e-05	0.000131516	0.49	463010
genus.Anaerostipes.id.1991	rs7823228	8	128397494	0.00125525	20.6661	G	C	-0.0621085	0.0136614	5.84e-06	16445	G	C	0.000281105	0.00016328	0.0850002	463010
genus.Bacteroides.id.918	rs13207588	6	41519430	0.00114879	20.3627	A	G	-0.059205	0.0131195	7.49e-06	17707	A	G	0.0001167	0.000160904	0.47	463010
genus.Bacteroides.id.918	rs1340391	1	102960989	0.00109376	20.0377	T	C	-0.0592004	0.0132244	6.73e-06	18302	T	C	6.43109e-05	0.000164769	0.7	463010
genus.Bacteroides.id.918	rs2366421	3	62019400	0.00110998	20.3319	T	A	-0.0528153	0.0117124	7.65e-06	18299	T	A	-0.000102902	0.000148102	0.49	463010
genus.Bacteroides.id.918	rs495004	9	112855426	0.00123421	21.8787	C	G	-0.0607475	0.0129865	3.42e-06	17707	C	G	0.00016588	0.000164179	0.31	463010
genus.Bacteroides.id.918	rs66710942	3	77215327	0.00115709	20.642	C	T	0.0488038	0.0107412	5.86e-06	17821	C	T	-4.48673e-05	0.000134088	0.74	463010
genus.Bacteroides.id.918	rs6795673	3	10593224	0.00142865	26.1803	C	T	0.0538565	0.0105251	3.38e-07	18301	C	T	3.72981e-05	0.000132099	0.780001	463010
genus.Bacteroides.id.918	rs9507307	13	24910476	0.00120359	21.91	C	T	0.0604456	0.0129128	2.13e-06	18184	C	T	-0.000141906	0.000166144	0.39	463010
genus.Barnesiella.id.944	rs12909713	15	87145913	0.00147954	21.045	C	T	-0.0550716	0.0120039	4.95e-06	14205	C	T	-0.000142847	0.00013236	0.28	463010
genus.Barnesiella.id.944	rs13242616	7	122021518	0.00160798	22.4562	T	C	-0.0583747	0.0123176	2.29e-06	13945	T	C	3.89084e-05	0.000139214	0.780001	463010
genus.Barnesiella.id.944	rs199035	6	23435415	0.00156384	21.8388	G	A	0.0559495	0.0119716	3e-06	13945	G	A	9.67166e-05	0.000131895	0.46	463010
genus.Barnesiella.id.944	rs2276875	4	5730954	0.00179362	24.9599	A	G	-0.0697176	0.0139537	4.65e-07	13893	A	G	-9.53533e-05	0.000151924	0.53	463010
genus.Barnesiella.id.944	rs62251337	3	44327429	0.00153117	21.3818	A	G	-0.0690763	0.0149374	4.24e-06	13945	A	G	9.32239e-05	0.000158015	0.56	463010
genus.Bifidobacterium.id.436	rs10841473	12	20378911	0.00157131	23.2526	G	C	-0.0624207	0.0129438	1.65e-06	14777	G	C	9.93001e-05	0.000149269	0.51	463010
genus.Bifidobacterium.id.436	rs12022129	1	207003374	0.00134308	19.8693	G	A	0.0619356	0.0138937	8e-06	14776	G	A	0.000105665	0.000163456	0.52	463010
genus.Bifidobacterium.id.436	rs182549	2	136616754	0.0059483	88.418	C	T	0.119703	0.0127294	1.28e-20	14778	C	T	-0.000264001	0.000148028	0.0749998	463010
genus.Bifidobacterium.id.436	rs2491158	10	126099734	0.00141583	19.8766	G	A	0.0712624	0.015983	8.05e-06	14021	G	A	-8.92132e-05	0.000148886	0.55	463010
genus.Bifidobacterium.id.436	rs4567981	2	49906864	0.00154675	22.7167	T	A	0.0562084	0.0117923	1.93e-06	14666	T	A	1.24491e-06	0.000133546	0.99	463010
genus.Bifidobacterium.id.436	rs540489	17	72897722	0.00144841	21.118	T	G	-0.0637641	0.0138746	5.19e-06	14561	T	G	9.43641e-05	0.000155372	0.54	463010
genus.Bifidobacterium.id.436	rs55888705	4	1517826	0.0013745	20.3362	A	G	0.0546319	0.0121139	6.67e-06	14777	A	G	-0.000142122	0.000136065	0.3	463010
genus.Bifidobacterium.id.436	rs56108664	5	537890	0.00153294	21.362	T	C	0.0729971	0.0157926	2.44e-06	13916	T	C	-5.30549e-05	0.000164941	0.75	463010
genus.Bifidobacterium.id.436	rs5746486	22	18354272	0.00133152	19.7008	T	C	-0.0536216	0.0120801	9e-06	14778	T	C	-0.000463193	0.000136819	0.000710003	463010
genus.Bifidobacterium.id.436	rs62181700	2	189805784	0.00153179	22.6622	G	A	-0.0624643	0.0131205	2.17e-06	14774	G	A	0.000163806	0.000146668	0.26	463010
genus.Bifidobacterium.id.436	rs857444	6	14617591	0.00143311	21.2047	C	T	0.0558234	0.0121219	3.57e-06	14777	C	T	8.61124e-05	0.000137779	0.53	463010
genus.Bilophila.id.3170	rs1241171	1	103299921	0.0016526	21.2777	G	A	-0.0692654	0.0150148	4.24e-06	12856	G	A	-0.000156737	0.00016121	0.33	463010
genus.Bilophila.id.3170	rs1969927	12	100786847	0.00154597	19.7804	G	A	0.0564589	0.0126935	9.07e-06	12777	G	A	-4.92804e-05	0.000133506	0.709999	463010
genus.Bilophila.id.3170	rs2713349	7	9510367	0.00150624	19.3859	A	T	0.0617228	0.0140174	8.63e-06	12853	A	T	-8.00135e-05	0.000149064	0.59	463010
genus.Bilophila.id.3170	rs2728491	7	47211859	0.00157197	20.2379	G	T	-0.0627416	0.0139456	6.33e-06	12856	G	T	-2.00789e-05	0.000145706	0.89	463010
genus.Bilophila.id.3170	rs542415	15	50011554	0.00165238	21.1441	T	C	-0.0613623	0.0133436	4.71e-06	12777	T	C	0.000135526	0.000139357	0.33	463010
genus.Bilophila.id.3170	rs60178956	8	90878338	0.00152403	19.4993	G	A	-0.0624818	0.0141485	8.06e-06	12777	G	A	-7.58286e-06	0.000150337	0.96	463010
genus.Bilophila.id.3170	rs7802841	7	138583840	0.00183865	23.6775	C	A	0.0670097	0.0137701	1.77e-06	12856	C	A	-0.000236841	0.000141901	0.0949992	463010
genus.Bilophila.id.3170	rs8013541	14	67640571	0.00160876	20.7123	A	T	-0.0571991	0.0125673	5.48e-06	12856	A	T	-0.000135554	0.000132607	0.31	463010
genus.Blautia.id.1992	rs12453000	17	16895873	0.0012974	23.1406	C	T	0.0625335	0.0129987	1.26e-06	17815	C	T	-3.58135e-05	0.000160707	0.82	463010
genus.Blautia.id.1992	rs3005511	6	74605806	0.00111848	20.4621	A	G	0.0501085	0.0110768	6.19e-06	18276	A	G	-2.50278e-05	0.000138762	0.86	463010
genus.Blautia.id.1992	rs67794373	7	124210039	0.00130679	23.7571	C	T	0.0601709	0.0123443	1e-06	18158	C	T	0.000164583	0.000157086	0.29	463010
genus.Blautia.id.1992	rs682885	11	87805911	0.00115437	21.117	A	G	-0.0493376	0.0107359	4.49e-06	18274	A	G	-9.75612e-05	0.000133922	0.47	463010
genus.Blautia.id.1992	rs7860714	9	1866537	0.00114929	20.8952	A	G	-0.0502178	0.0109853	4.09e-06	18162	A	G	-3.73097e-05	0.000140339	0.79	463010
genus.Butyricicoccus.id.2055	rs10084203	2	191304149	0.00115369	19.789	A	G	0.0549699	0.0123563	8.59e-06	17135	A	G	5.35309e-05	0.000151439	0.719999	463010
genus.Butyricicoccus.id.2055	rs2017189	4	7460153	0.0012328	21.1451	G	T	-0.0506956	0.011024	3.87e-06	17133	G	T	0.000191605	0.000132631	0.15	463010
genus.Butyricicoccus.id.2055	rs4962426	10	126908208	0.00120662	20.4007	G	T	0.0614216	0.0135979	7.38e-06	16889	G	T	-8.93781e-05	0.000159018	0.57	463010
genus.Butyricicoccus.id.2055	rs75238760	18	22899113	0.00114966	19.5897	T	A	0.0619423	0.0139942	6.8e-06	17022	T	A	-6.61009e-06	0.000165237	0.97	463010
genus.Butyricimonas.id.945	rs2114713	15	80528373	0.00189333	20.3577	G	T	0.062721	0.0138998	6.88e-06	10734	G	T	2.9581e-06	0.000133227	0.98	463010
genus.Butyricimonas.id.945	rs2642760	5	62119947	0.00225856	24.0674	G	C	0.0713357	0.0145396	8.58e-07	10634	G	C	7.12331e-05	0.000136366	0.6	463010
genus.Butyricimonas.id.945	rs270727	1	45082825	0.00198883	21.1874	G	C	-0.0694173	0.0150795	5.38e-06	10634	G	C	1.21487e-05	0.000144929	0.93	463010
genus.Butyricimonas.id.945	rs326049	5	997217	0.00194202	20.5379	C	G	0.0759694	0.0167617	8.19e-06	10557	C	G	1.19511e-05	0.00016187	0.94	463010
genus.Butyricimonas.id.945	rs62130338	19	49162501	0.00202409	21.4076	G	A	-0.0732608	0.0158324	3.9e-06	10557	G	A	-0.000193333	0.000158518	0.22	463010
genus.Butyricimonas.id.945	rs62390301	5	159867647	0.00233752	24.9107	T	C	-0.0872983	0.0174893	7.42e-07	10634	T	C	0.000333851	0.000165328	0.0430002	463010
genus.Butyricimonas.id.945	rs7083431	10	72711156	0.0022048	23.7208	A	C	0.0703539	0.0144439	8.85e-07	10737	A	C	0.00011137	0.000137981	0.42	463010
genus.Butyricimonas.id.945	rs72814525	10	72443070	0.0018284	19.662	A	G	0.0664154	0.0149766	8.25e-06	10736	A	G	-5.49437e-05	0.000141528	0.7	463010
genus.Butyricimonas.id.945	rs782080	3	127468661	0.00208572	22.4286	T	A	0.0653488	0.0137973	2.23e-06	10733	T	A	0.000178699	0.000133797	0.18	463010
genus.Butyricimonas.id.945	rs9657374	8	4834406	0.00196185	21.1018	C	T	0.0680719	0.0148172	4.5e-06	10737	C	T	-4.28279e-05	0.000142577	0.760001	463010
genus.Butyrivibrio.id.1993	rs1007475	6	148403405	0.00583036	20.4086	G	T	0.118065	0.0261271	7.92e-06	3482	G	T	-0.000229743	0.000142236	0.11	463010
genus.Butyrivibrio.id.1993	rs16934069	9	119693164	0.00569991	19.9494	T	C	-0.133784	0.0299444	8.86e-06	3482	T	C	-0.000238833	0.000164963	0.15	463010
genus.Butyrivibrio.id.1993	rs16941336	17	20575697	0.00645996	22.6268	C	T	0.127488	0.0267936	1.53e-06	3482	C	T	0.000168101	0.000148606	0.26	463010
genus.Butyrivibrio.id.1993	rs17163238	5	128976021	0.00593876	20.7904	G	A	0.140987	0.0309117	5.51e-06	3482	G	A	0.000152758	0.000162896	0.35	463010
genus.Butyrivibrio.id.1993	rs4537857	13	27292666	0.00650203	22.7752	T	C	-0.12459	0.0260992	1.8e-06	3482	T	C	-5.08679e-05	0.000143748	0.719999	463010
genus.Butyrivibrio.id.1993	rs486484	20	811507	0.00586231	20.3678	A	G	-0.108349	0.0240008	6.61e-06	3456	A	G	0.000101922	0.000131436	0.44	463010
genus.Butyrivibrio.id.1993	rs7752361	6	111780705	0.00704156	24.6713	A	G	-0.11923	0.0239975	7.69e-07	3481	A	G	7.88015e-05	0.000131676	0.55	463010
genus.Butyrivibrio.id.1993	rs7763512	6	21960091	0.0068185	22.3603	G	A	0.119846	0.0253367	3.11e-06	3259	G	A	2.17611e-05	0.000133638	0.87	463010
genus.Butyrivibrio.id.1993	rs9349693	6	53939724	0.00588424	20.5984	A	G	0.117973	0.0259861	5.55e-06	3482	A	G	-0.000113205	0.000142935	0.43	463010
genus.CandidatusSoleaferrea.id.11350	rs10090365	8	138638199	0.00344697	21.248	A	G	-0.0834413	0.0180989	4.17e-06	6145	A	G	-0.000222904	0.00013169	0.0909997	463010
genus.CandidatusSoleaferrea.id.11350	rs10108780	8	123882833	0.00358555	21.5799	A	G	-0.092834	0.0199807	3.64e-06	5999	A	G	2.63431e-05	0.000144709	0.86	463010
genus.CandidatusSoleaferrea.id.11350	rs10809135	9	10611282	0.00347903	20.9366	T	C	0.0834858	0.0182426	5.47e-06	5999	T	C	3.49781e-05	0.000131084	0.79	463010
genus.CandidatusSoleaferrea.id.11350	rs12500231	4	52935445	0.00321895	19.8379	A	T	0.0813853	0.0182696	7.68e-06	6145	A	T	2.32869e-05	0.000132434	0.86	463010
genus.CandidatusSoleaferrea.id.11350	rs36155147	7	352368	0.00317395	18.9642	C	T	0.104966	0.0240995	5.41e-06	5958	C	T	-0.000121776	0.000178225	0.49	463010
genus.CandidatusSoleaferrea.id.11350	rs386526	10	82879688	0.00335061	20.6486	C	G	0.0818459	0.0180086	8.33e-06	6144	C	G	7.40585e-05	0.000129314	0.57	463010
genus.CandidatusSoleaferrea.id.11350	rs4678258	3	137945192	0.00341588	20.9049	T	C	0.0986136	0.0215646	5.53e-06	6101	T	C	-7.41901e-05	0.000157325	0.64	463010
genus.CandidatusSoleaferrea.id.11350	rs61825792	1	224687852	0.00379638	23.41	T	C	0.112199	0.0231856	1.37e-06	6145	T	C	-0.00016879	0.000165236	0.31	463010
genus.CandidatusSoleaferrea.id.11350	rs6489992	12	115352769	0.0032768	20.1857	A	G	-0.0840437	0.0187031	7.89e-06	6142	A	G	-7.86705e-05	0.000135732	0.56	463010
genus.CandidatusSoleaferrea.id.11350	rs6494306	15	62394540	0.0033207	20.467	A	G	-0.0969304	0.0214221	5.8e-06	6145	A	G	3.34156e-05	0.000157645	0.83	463010
genus.CandidatusSoleaferrea.id.11350	rs6881988	5	172758774	0.00329365	20.2832	G	C	-0.0819131	0.018185	9.23e-06	6140	G	C	-0.000156196	0.000132597	0.24	463010
genus.CandidatusSoleaferrea.id.11350	rs7400877	14	76403542	0.00324017	19.9691	T	C	-0.0951085	0.0212799	9.29e-06	6145	T	C	3.97178e-05	0.000155563	0.8	463010
genus.CandidatusSoleaferrea.id.11350	rs9973954	2	19885907	0.0033803	20.8356	A	G	0.0892075	0.0195401	5.95e-06	6145	A	G	-6.50169e-05	0.000146033	0.66	463010
genus.Catenibacterium.id.2153	rs12404911	1	240118443	0.00656552	21.3931	C	T	0.140717	0.0304142	2.8e-06	3239	C	T	0.000103269	0.000168095	0.54	463010
genus.Catenibacterium.id.2153	rs212393	6	159485742	0.0068476	22.3185	G	A	-0.135254	0.0286209	3.62e-06	3239	G	A	3.26114e-05	0.000140254	0.82	463010
genus.Catenibacterium.id.2153	rs73128290	7	57364320	0.00637546	20.7698	A	G	0.129726	0.0284563	4.29e-06	3239	A	G	0.000129215	0.000147424	0.38	463010
genus.Catenibacterium.id.2153	rs7742829	6	105089665	0.0063356	20.6391	C	T	0.11411	0.0251099	5.61e-06	3239	C	T	-7.02631e-05	0.000133877	0.6	463010
genus.ChristensenellaceaeR.7group.id.11283	rs10461257	4	156131004	0.00127731	20.4439	A	G	-0.0551969	0.0122069	6.51e-06	15987	A	G	1.57052e-05	0.000155001	0.92	463010
genus.ChristensenellaceaeR.7group.id.11283	rs60954665	19	35883736	0.00123702	20.2156	T	G	0.049815	0.0110787	7.13e-06	16324	T	G	2.15208e-05	0.000131631	0.87	463010
genus.ChristensenellaceaeR.7group.id.11283	rs892686	9	83043376	0.00130382	21.31	A	G	0.0514099	0.011136	3.97e-06	16325	A	G	0.000249944	0.000132196	0.0589997	463010
genus.ChristensenellaceaeR.7group.id.11283	rs999354	19	34076956	0.0014997	24.5148	T	A	0.0580248	0.0117185	7.01e-07	16324	T	A	5.02622e-05	0.000139503	0.719999	463010
genus.Clostridiumsensustricto1.id.1873	rs12490337	3	111482845	0.00142167	20.1012	C	G	-0.0616879	0.0137581	7.49e-06	14121	C	G	-5.30278e-06	0.000153867	0.97	463010
genus.Clostridiumsensustricto1.id.1873	rs2817172	1	3041519	0.0015943	21.8065	C	T	0.058139	0.0124492	2.77e-06	13658	C	T	-8.07319e-05	0.000136276	0.55	463010
genus.Collinsella.id.815	rs10890671	11	107123199	0.00142438	20.4433	T	C	-0.0537401	0.0118848	6.52e-06	14334	T	C	-0.000126724	0.000131245	0.33	463010
genus.Collinsella.id.815	rs11597285	10	8589813	0.00138734	19.911	G	T	-0.0537947	0.0120548	9.38e-06	14334	G	T	0.000109454	0.000132215	0.41	463010
genus.Collinsella.id.815	rs12921100	16	77283458	0.00137242	19.6965	A	T	0.0563759	0.0127019	8.23e-06	14334	A	T	0.000116433	0.000143916	0.42	463010
genus.Collinsella.id.815	rs2671662	17	47529492	0.00157359	22.5883	C	G	-0.0567751	0.011945	2.22e-06	14334	C	G	2.79958e-05	0.000132834	0.83	463010
genus.Collinsella.id.815	rs59414781	15	50026113	0.00138944	19.9412	C	G	0.0668866	0.0149773	9.15e-06	14334	C	G	0.00015736	0.00016597	0.34	463010
genus.Collinsella.id.815	rs62448871	7	24465024	0.00140476	20.1613	C	A	-0.0540309	0.0120324	6.78e-06	14334	C	A	0.000120609	0.000132467	0.36	463010
genus.Coprobacter.id.949	rs11532348	12	98289796	0.00328806	20.9876	C	T	-0.103931	0.0226826	5.71e-06	6364	C	T	0.000228472	0.000162402	0.16	463010
genus.Coprobacter.id.949	rs12684609	9	137784868	0.00327873	20.9279	T	C	0.100827	0.0220366	6.1e-06	6364	T	C	-0.000393642	0.000167638	0.0189998	463010
genus.Coprobacter.id.949	rs12996055	2	137223458	0.00294084	19.3724	A	C	0.0921817	0.0209405	8.08e-06	6570	A	C	0.00025598	0.000154121	0.0969996	463010
genus.Coprobacter.id.949	rs189356	20	57574851	0.00304329	20.6385	G	A	0.0781125	0.0171916	6.26e-06	6763	G	A	0.000210444	0.00013171	0.11	463010
genus.Coprobacter.id.949	rs213863	6	97234939	0.00325385	22.1853	C	T	-0.0887412	0.0188377	2.35e-06	6798	C	T	-0.000254526	0.000146267	0.0819993	463010
genus.Coprobacter.id.949	rs3828477	3	46483717	0.00318606	21.7217	G	T	-0.091218	0.019569	2.89e-06	6798	G	T	4.72073e-05	0.000153366	0.760001	463010
genus.Coprobacter.id.949	rs5011652	15	91166608	0.00297358	20.224	G	C	0.0899597	0.020001	5.51e-06	6783	G	C	-0.000115013	0.000153349	0.450001	463010
genus.Coprococcus1.id.11301	rs1010560	1	30400301	0.00133496	22.3517	C	A	0.0580232	0.0122722	1.96e-06	16723	C	A	0.000212598	0.00014305	0.14	463010
genus.Coprococcus1.id.11301	rs12886051	14	29898456	0.00117317	19.5339	G	C	-0.0521782	0.0118051	8.01e-06	16633	G	C	7.46567e-05	0.000139407	0.59	463010
genus.Coprococcus1.id.11301	rs1519491	2	22079770	0.00115355	19.3223	T	C	0.0499197	0.0113558	8.95e-06	16733	T	C	-9.41559e-05	0.000133116	0.48	463010
genus.Coprococcus1.id.11301	rs1576241	6	72529277	0.00129595	21.7056	A	G	-0.0510343	0.0109535	3.33e-06	16729	A	G	-1.00036e-05	0.000131506	0.94	463010
genus.Coprococcus1.id.11301	rs2907920	19	2600717	0.00121915	19.5766	A	G	0.0561173	0.0126824	7.65e-06	16040	A	G	9.79233e-05	0.00014624	0.5	463010
genus.Coprococcus1.id.11301	rs4277593	20	4319420	0.00170213	28.387	G	A	-0.0585649	0.0109914	1.14e-07	16651	G	A	-5.34934e-05	0.000131224	0.68	463010
genus.Coprococcus1.id.11301	rs73167075	3	165693143	0.00120476	20.1812	T	C	0.0573137	0.0127573	8.57e-06	16733	T	C	6.51781e-05	0.000154964	0.67	463010
genus.Coprococcus1.id.11301	rs7784490	7	132556835	0.00125386	21.0047	C	G	-0.0518543	0.0113136	4.55e-06	16733	C	G	-0.000169207	0.000135423	0.21	463010
genus.Coprococcus2.id.11302	rs10070053	5	34794789	0.00167704	19.2697	A	G	0.0594312	0.0135375	7.65e-06	11473	A	G	-0.000190299	0.000134324	0.16	463010
genus.Coprococcus2.id.11302	rs12634070	3	180544880	0.0017376	19.9388	T	C	0.0736486	0.0164921	9.95e-06	11457	T	C	9.76871e-05	0.000161353	0.54	463010
genus.Coprococcus2.id.11302	rs1958519	14	86833255	0.00208978	23.0503	T	A	0.0665288	0.0138558	1.58e-06	11009	T	A	-0.0001512	0.000132796	0.25	463010
genus.Coprococcus2.id.11302	rs2482516	9	25554068	0.00182563	20.9984	C	T	0.0754415	0.0164619	4.72e-06	11483	C	T	-0.000308356	0.000163641	0.0599998	463010
genus.Coprococcus2.id.11302	rs35890118	10	129715759	0.00176583	20.3005	A	G	-0.066536	0.0147661	8.26e-06	11478	A	G	0.000350927	0.000146243	0.016	463010
genus.Coprococcus2.id.11302	rs6677933	1	112139008	0.00208524	23.9906	C	T	-0.0804405	0.0164216	1.19e-06	11483	C	T	-0.000258267	0.000159806	0.11	463010
genus.Coprococcus2.id.11302	rs72680320	4	131125786	0.00197324	21.7623	T	C	-0.0649382	0.013919	2.27e-06	11009	T	C	2.69237e-05	0.000132296	0.84	463010
genus.Coprococcus2.id.11302	rs9426473	1	4210455	0.00175935	20.24	A	G	0.0727361	0.0161662	6.31e-06	11486	A	G	-0.000144973	0.000160199	0.37	463010
genus.Coprococcus3.id.11303	rs10810043	9	13799809	0.00124751	19.7739	A	G	0.0515518	0.0115923	9.27e-06	15833	A	G	-0.000227698	0.000135483	0.0929994	463010
genus.Coprococcus3.id.11303	rs11077359	17	76343961	0.00122148	18.8044	T	C	-0.0645443	0.0148833	9.64e-06	15378	T	C	4.45684e-06	0.00016099	0.98	463010
genus.Coprococcus3.id.11303	rs11080344	17	26104511	0.00131851	20.9036	C	T	0.0516921	0.0113054	4.79e-06	15835	C	T	0.000135056	0.000132767	0.31	463010
genus.Coprococcus3.id.11303	rs13247359	7	76357726	0.00129481	20.5247	G	A	0.051211	0.0113031	7.33e-06	15833	G	A	4.56616e-05	0.000130996	0.73	463010
genus.Coprococcus3.id.11303	rs4575475	14	99141751	0.00133223	20.2128	G	A	0.0619514	0.0137787	7.04e-06	15154	G	A	0.000292782	0.00015801	0.064	463010
genus.Coprococcus3.id.11303	rs62481985	8	4128340	0.00165335	25.6197	G	C	-0.0582385	0.0115052	4.18e-07	15472	G	C	-0.000184461	0.000133219	0.17	463010
genus.Coprococcus3.id.11303	rs7521171	1	149998497	0.00137382	21.2822	G	A	-0.0596434	0.0129279	4.32e-06	15472	G	A	0.000100606	0.000147745	0.5	463010
genus.Coprococcus3.id.11303	rs8100692	19	40032132	0.00163305	25.8885	T	C	0.0577411	0.0113476	4.16e-07	15829	T	C	4.29432e-05	0.000132698	0.75	463010
genus.DefluviitaleaceaeUCG011.id.11287	rs1582238	1	118723685	0.0028936	23.1609	T	C	0.0805036	0.0167257	1.57e-06	7983	T	C	0.000148549	0.000140183	0.29	463010
genus.DefluviitaleaceaeUCG011.id.11287	rs2892880	4	120741726	0.00246984	20.2533	G	A	0.0817755	0.0181686	6.83e-06	8182	G	A	-4.17453e-05	0.000151874	0.780001	463010
genus.DefluviitaleaceaeUCG011.id.11287	rs4344384	10	66407366	0.00255838	20.9761	G	T	0.0715978	0.0156309	4.83e-06	8180	G	T	9.52345e-05	0.000131764	0.47	463010
genus.DefluviitaleaceaeUCG011.id.11287	rs4677103	3	72207794	0.00306906	24.5696	A	G	0.0977912	0.0197263	9.6e-07	7983	A	G	2.59223e-05	0.000170958	0.88	463010
genus.Desulfovibrio.id.3173	rs11160353	14	97116904	0.00238321	22.0543	T	A	-0.0691756	0.0147285	2.7e-06	9234	T	A	-0.00019163	0.000131753	0.15	463010
genus.Desulfovibrio.id.3173	rs2032031	10	130170270	0.00209532	19.3993	A	G	-0.0654931	0.0148681	9.14e-06	9241	A	G	-7.33485e-05	0.000131956	0.58	463010
genus.Desulfovibrio.id.3173	rs2853179	8	105462047	0.00242095	21.7128	C	T	0.0811971	0.0174234	2.42e-06	8949	C	T	-0.000118838	0.000156085	0.450001	463010
genus.Desulfovibrio.id.3173	rs6580353	5	139410687	0.00222768	20.6275	T	C	0.0770979	0.0169735	4.94e-06	9241	T	C	0.000170268	0.000160396	0.29	463010
genus.Desulfovibrio.id.3173	rs7729080	5	52653978	0.00214528	19.8628	C	A	-0.070287	0.0157691	9.96e-06	9241	C	A	-0.000167545	0.00014113	0.24	463010
genus.Dialister.id.2183	rs10938938	4	23294359	0.00179331	20.4786	G	A	-0.0773514	0.0170915	7.37e-06	11401	G	A	0.000164952	0.000167252	0.32	463010
genus.Dialister.id.2183	rs11071887	15	32955095	0.00170664	20.4925	T	C	0.0662403	0.0146315	5.91e-06	11989	T	C	3.67811e-05	0.000147332	0.8	463010
genus.Dialister.id.2183	rs11166701	8	138295725	0.00210288	24.6934	G	A	-0.0655301	0.013186	5.51e-07	11720	G	A	-7.66634e-05	0.000131452	0.56	463010
genus.Dialister.id.2183	rs2435610	7	150890034	0.0016985	20.3861	A	C	0.0647131	0.0143314	5.93e-06	11984	A	C	0.0002004	0.000145759	0.17	463010
genus.Dialister.id.2183	rs4747450	10	23199653	0.00170642	20.4864	C	A	0.0668509	0.0147685	5.84e-06	11987	C	A	-1.65764e-05	0.000148936	0.91	463010
genus.Dialister.id.2183	rs4753063	11	92267129	0.00175044	21.0194	G	A	-0.0596297	0.0130052	4.86e-06	11989	G	A	2.80123e-05	0.00013208	0.83	463010
genus.Dialister.id.2183	rs75416973	1	172809633	0.00171091	19.5378	A	G	0.0727223	0.016451	9.46e-06	11402	A	G	-0.000112634	0.000168389	0.5	463010
genus.Dialister.id.2183	rs764177	3	45809449	0.00164409	19.7385	C	A	-0.0601454	0.0135366	9.61e-06	11988	C	A	-0.000177173	0.00014067	0.21	463010
genus.Dorea.id.1997	rs11150408	16	81803497	0.00116284	20.0393	T	G	0.0488254	0.0109063	7.06e-06	17215	T	G	-4.84942e-05	0.000131539	0.709999	463010
genus.Dorea.id.1997	rs12537781	7	154978183	0.00111612	19.6724	T	C	-0.055544	0.0125223	9.15e-06	17608	T	C	-2.21825e-05	0.000149288	0.88	463010
genus.Dorea.id.1997	rs3005511	6	74605806	0.00118636	20.9143	A	G	0.0516127	0.0112852	5.29e-06	17610	A	G	-2.50278e-05	0.000138762	0.86	463010
genus.Dorea.id.1997	rs345219	3	6826520	0.00113167	19.5015	T	G	-0.0497368	0.0112621	8.8e-06	17215	T	G	-4.45277e-05	0.000138199	0.75	463010
genus.Dorea.id.1997	rs4793307	17	70733523	0.00124723	21.9762	C	T	0.0574165	0.0122472	4.01e-06	17600	C	T	-9.77265e-06	0.000149284	0.95	463010
genus.Dorea.id.1997	rs62583469	9	106815466	0.00118056	19.8769	T	A	-0.0634136	0.0142227	5.78e-06	16819	T	A	-0.000155199	0.000163255	0.34	463010
genus.Eggerthella.id.819	rs1784446	11	102461599	0.00406292	20.989	G	A	0.0907728	0.0198096	5.23e-06	5147	G	A	-8.10127e-05	0.000132677	0.54	463010
genus.Eggerthella.id.819	rs2223081	21	29778032	0.00416372	21.5119	G	A	0.102572	0.0221108	3.89e-06	5147	G	A	7.2218e-05	0.000150565	0.630001	463010
genus.Eggerthella.id.819	rs2240838	7	38335954	0.00475922	24.6033	A	G	0.0980582	0.0197653	7.36e-07	5147	A	G	1.82842e-05	0.00013372	0.89	463010
genus.Eggerthella.id.819	rs2877457	4	70483957	0.00387606	19.7709	G	A	-0.093486	0.0210208	9.03e-06	5083	G	A	-8.88007e-05	0.000144249	0.54	463010
genus.Eggerthella.id.819	rs3851328	2	45453805	0.0040176	20.754	T	G	-0.107774	0.0236527	4.18e-06	5147	T	G	-2.65413e-05	0.000154526	0.86	463010
genus.Eggerthella.id.819	rs4985746	17	17098213	0.00404322	19.9084	G	A	0.110522	0.0247653	5.71e-06	4906	G	A	-6.00258e-05	0.000158355	0.7	463010
genus.Eggerthella.id.819	rs6430926	2	141337454	0.0038546	19.9087	C	T	0.0879736	0.0197127	8.37e-06	5147	C	T	8.23066e-05	0.000131423	0.53	463010
genus.Eggerthella.id.819	rs67490567	15	65691324	0.00382895	19.5297	T	C	0.108495	0.0245457	8.94e-06	5083	T	C	-9.56337e-05	0.000170362	0.57	463010
genus.Eisenbergiella.id.11304	rs11079158	17	53367641	0.0035559	19.9128	T	C	0.100627	0.022546	7.35e-06	5582	T	C	-4.14292e-05	0.000153647	0.79	463010
genus.Eisenbergiella.id.11304	rs11938607	4	189060431	0.00363813	20.3786	T	C	0.0978125	0.0216636	8.22e-06	5583	T	C	0.000197238	0.000155834	0.21	463010
genus.Eisenbergiella.id.11304	rs12257723	10	109417101	0.00361978	20.2717	A	C	-0.0952742	0.0211569	8.85e-06	5582	A	C	-0.000118702	0.000145923	0.42	463010
genus.Eisenbergiella.id.11304	rs12710729	2	19973210	0.00359448	20.1332	C	A	0.0893384	0.0199069	9.84e-06	5583	C	A	-2.53991e-05	0.000137832	0.85	463010
genus.Eisenbergiella.id.11304	rs1508033	15	53375201	0.00390284	21.8553	A	C	0.091546	0.0195787	3.23e-06	5580	A	C	0.000131218	0.000137402	0.34	463010
genus.Eisenbergiella.id.11304	rs2683098	15	36178565	0.00405372	22.7118	C	T	0.107319	0.022515	2.24e-06	5582	C	T	-0.00022444	0.000160593	0.16	463010
genus.Eisenbergiella.id.11304	rs3812426	8	50822676	0.0040229	22.5425	G	A	0.106447	0.0224159	2.72e-06	5583	G	A	0.000191619	0.000155375	0.22	463010
genus.Eisenbergiella.id.11304	rs4462860	21	21610254	0.00397769	21.7969	G	A	0.0939071	0.0201104	4.16e-06	5460	G	A	-0.00019034	0.000139998	0.17	463010
genus.Enterorhabdus.id.820	rs11098863	4	127336602	0.00466477	35.2528	T	A	-0.0966008	0.0162677	3.06e-09	7524	T	A	-5.32791e-05	0.000131467	0.69	463010
genus.Enterorhabdus.id.820	rs2051957	7	89709883	0.00261507	19.7221	C	T	0.0843291	0.0189864	8.9e-06	7524	C	T	-0.00012272	0.000150021	0.41	463010
genus.Enterorhabdus.id.820	rs424715	19	35863028	0.00290555	21.9192	T	C	0.0818743	0.0174855	4.41e-06	7524	T	C	0.000206101	0.000153579	0.18	463010
genus.Enterorhabdus.id.820	rs7923280	10	20280612	0.00342407	25.8443	A	T	0.0860019	0.0169148	5.24e-07	7524	A	T	6.01464e-06	0.000135457	0.96	463010
genus.Enterorhabdus.id.820	rs9470637	6	37567189	0.00273687	20.6432	A	T	-0.0755513	0.0166263	5.7e-06	7524	A	T	-0.000119222	0.000133843	0.37	463010
genus.Erysipelatoclostridium.id.11381	rs1434153	2	34595533	0.00208253	20.1593	G	A	-0.0684526	0.0152443	6.85e-06	9662	G	A	-6.25612e-05	0.000143301	0.66	463010
genus.Erysipelatoclostridium.id.11381	rs17804233	5	77815056	0.00215554	21.1289	T	C	-0.0662914	0.0144203	4.59e-06	9783	T	C	0.000179199	0.000131479	0.17	463010
genus.Erysipelatoclostridium.id.11381	rs2901723	11	36871523	0.00204043	19.7508	C	A	0.0641339	0.0144295	8.79e-06	9662	C	A	-0.000412091	0.000131197	0.0017	463010
genus.Erysipelatoclostridium.id.11381	rs340991	5	34892042	0.00221555	21.714	A	G	-0.0740482	0.0158891	3.75e-06	9781	A	G	0.000304597	0.000143441	0.0340001	463010
genus.Erysipelatoclostridium.id.11381	rs45480394	19	55857777	0.00212794	20.4761	T	G	-0.0687134	0.0151835	7.66e-06	9604	T	G	0.000133263	0.000136111	0.33	463010
genus.Erysipelatoclostridium.id.11381	rs4697572	4	25446787	0.00251333	24.6347	A	G	-0.0810636	0.0163308	7.59e-07	9779	A	G	-0.000239913	0.000150626	0.11	463010
genus.Erysipelatoclostridium.id.11381	rs622418	9	90586043	0.00221895	21.7518	A	G	-0.0668051	0.0143224	3.68e-06	9783	A	G	7.49666e-05	0.000131277	0.57	463010
genus.Erysipelatoclostridium.id.11381	rs6474512	8	38780606	0.0022336	21.8958	A	C	0.067015	0.0143201	3.02e-06	9783	A	C	-8.05078e-05	0.000133204	0.55	463010
genus.Erysipelatoclostridium.id.11381	rs7221249	17	10177708	0.00352693	34.6119	A	G	0.0839861	0.0142741	4.31e-09	9781	A	G	-7.38594e-05	0.000132062	0.58	463010
genus.Erysipelatoclostridium.id.11381	rs9590927	13	46372065	0.00206806	20.2675	G	A	-0.0646003	0.0143479	6.39e-06	9782	G	A	-0.000103028	0.000131759	0.43	463010
genus.ErysipelotrichaceaeUCG003.id.11384	rs12251396	10	878895	0.00138716	19.7376	A	G	-0.0705399	0.0158766	9.52e-06	14211	A	G	8.18099e-05	0.000163681	0.62	463010
genus.ErysipelotrichaceaeUCG003.id.11384	rs28568391	10	125628540	0.00165993	24.1788	A	G	-0.0583911	0.0118741	6.42e-07	14544	A	G	-3.82199e-05	0.000132863	0.77	463010
genus.ErysipelotrichaceaeUCG003.id.11384	rs4758231	11	7765096	0.00137072	20.4353	G	T	-0.0551754	0.0122047	6.55e-06	14890	G	T	-0.000187343	0.000141538	0.19	463010
genus.ErysipelotrichaceaeUCG003.id.11384	rs59068084	4	113256737	0.00151504	22.0651	T	G	0.0564772	0.0120224	3.12e-06	14544	T	G	0.000178981	0.000133361	0.18	463010
genus.Escherichia.Shigella.id.3504	rs1154904	11	134774845	0.00183325	22.0395	A	G	-0.0613376	0.0130644	3.04e-06	12002	A	G	-7.61746e-05	0.000131647	0.56	463010
genus.Escherichia.Shigella.id.3504	rs118526	5	79863544	0.00160946	19.1045	C	A	-0.0594401	0.013598	8e-06	11853	C	A	-0.000127205	0.000133577	0.34	463010
genus.Escherichia.Shigella.id.3504	rs4731451	7	128054100	0.00169381	20.3585	G	A	-0.0609885	0.0135157	7.47e-06	12001	G	A	-4.28004e-05	0.000136865	0.75	463010
genus.Escherichia.Shigella.id.3504	rs57024273	2	236515155	0.00168684	20.0246	T	C	0.0626172	0.0139919	9.7e-06	11853	T	C	-0.000160115	0.000145623	0.27	463010
genus.Escherichia.Shigella.id.3504	rs592299	9	136179347	0.00173958	20.8992	T	C	-0.0592004	0.0129486	4.77e-06	11995	T	C	0.000444702	0.000131679	0.000729995	463010
genus.Faecalibacterium.id.2057	rs1271565	14	64044097	0.00131336	23.1929	C	T	-0.0576251	0.0119649	1.3e-06	17638	C	T	-9.24912e-05	0.000147122	0.53	463010
genus.Faecalibacterium.id.2057	rs28376661	15	47404021	0.00117655	21.303	C	G	0.0504817	0.0109368	3.66e-06	18087	C	G	-0.00013721	0.00013479	0.31	463010
genus.Faecalibacterium.id.2057	rs9536330	13	53567017	0.00110628	20.0237	T	C	-0.048317	0.010797	5.33e-06	18082	T	C	0.00014703	0.000135136	0.28	463010
genus.FamilyXIIIAD3011group.id.11293	rs149302	5	14159925	0.00142979	20.3178	T	C	-0.0645635	0.0143225	7.48e-06	14192	T	C	-0.000128807	0.000161315	0.42	463010
genus.FamilyXIIIAD3011group.id.11293	rs16840310	1	240694163	0.00174191	24.7765	A	G	-0.0608052	0.0122149	6.75e-07	14201	A	G	0.000109611	0.000136878	0.42	463010
genus.FamilyXIIIAD3011group.id.11293	rs739451	9	136678954	0.00136365	19.3834	C	T	0.0649589	0.0147534	7.88e-06	14197	C	T	-0.000124852	0.000163422	0.44	463010
genus.FamilyXIIIAD3011group.id.11293	rs9276029	6	32697037	0.00140577	19.0947	A	G	-0.0811384	0.0185669	8.93e-06	13566	A	G	-0.000209647	0.000158147	0.18	463010
genus.FamilyXIIIAD3011group.id.11293	rs9852893	3	3556826	0.00182844	25.9785	C	G	0.0657834	0.0129056	3.88e-07	14184	C	G	-4.06061e-05	0.000144036	0.780001	463010
genus.FamilyXIIIUCG001.id.11294	rs12049454	1	85228325	0.00182532	23.3081	T	C	-0.0647298	0.0134065	1.17e-06	12748	T	C	2.22049e-05	0.000141849	0.88	463010
genus.FamilyXIIIUCG001.id.11294	rs1426266	3	188224096	0.00184324	23.5429	T	C	-0.0665521	0.0137151	1.25e-06	12751	T	C	-0.000106431	0.00014378	0.46	463010
genus.FamilyXIIIUCG001.id.11294	rs62414802	6	76598635	0.00161904	20.673	C	T	-0.0611904	0.013457	4.29e-06	12750	C	T	0.000142375	0.000138311	0.3	463010
genus.Flavonifractor.id.2059	rs12030302	1	77887835	0.00234163	25.356	A	G	-0.0692276	0.0137467	5.61e-07	10805	A	G	-9.40181e-05	0.000131872	0.48	463010
genus.Flavonifractor.id.2059	rs34066017	11	44849689	0.00213261	22.8741	A	G	0.0764294	0.0159789	1.52e-06	10705	A	G	-3.27023e-05	0.000149716	0.83	463010
genus.Flavonifractor.id.2059	rs806808	10	32381186	0.00220573	23.8723	T	C	0.0667272	0.0136557	1.18e-06	10801	T	C	-2.91028e-06	0.000131151	0.98	463010
genus.Fusicatenibacter.id.11305	rs10439674	21	42681392	0.00111301	19.3645	A	G	-0.0572129	0.0130007	7.68e-06	17381	A	G	6.6049e-05	0.000163538	0.69	463010
genus.Fusicatenibacter.id.11305	rs1864685	17	70721782	0.00120433	20.9468	A	C	-0.0494799	0.0108105	4.96e-06	17374	A	C	0.000112074	0.000131481	0.39	463010
genus.Fusicatenibacter.id.11305	rs2039204	9	130371107	0.00122013	21.233	T	A	-0.0497414	0.0107941	3.94e-06	17383	T	A	0.000109311	0.000131288	0.41	463010
genus.Fusicatenibacter.id.11305	rs206581	18	10370596	0.00113467	19.7453	A	G	-0.0568339	0.0127894	8.96e-06	17384	A	G	-0.000323427	0.00015775	0.04	463010
genus.Fusicatenibacter.id.11305	rs4378146	1	24927625	0.0013924	24.2364	A	C	-0.0616691	0.0125259	7.2e-07	17384	A	C	-3.45373e-05	0.000151208	0.82	463010
genus.Fusicatenibacter.id.11305	rs60254196	7	148856720	0.00119268	20.2711	A	G	-0.0492427	0.0109365	5.47e-06	16978	A	G	0.000164799	0.000131789	0.21	463010
genus.Fusicatenibacter.id.11305	rs73103914	12	58658311	0.00113398	19.7333	A	G	-0.0597324	0.0134458	8.3e-06	17384	A	G	0.000167678	0.000160506	0.3	463010
genus.Fusicatenibacter.id.11305	rs792108	2	5532793	0.00117302	19.9366	T	C	-0.0508345	0.0113843	8.5e-06	16978	T	C	8.29186e-05	0.000136699	0.54	463010
genus.Fusicatenibacter.id.11305	rs9905659	17	70701932	0.00116949	20.3518	G	A	-0.061617	0.0136576	7.31e-06	17384	G	A	-0.000154192	0.000167753	0.36	463010
genus.Gordonibacter.id.821	rs117347059	7	129433205	0.00546295	20.2251	G	C	-0.128261	0.0285123	9.17e-06	3684	G	C	0.00016654	0.000162053	0.3	463010
genus.Gordonibacter.id.821	rs13412653	2	30158494	0.00540424	20.2184	A	C	0.107597	0.0239228	8.61e-06	3723	A	C	0.000169777	0.000137286	0.22	463010
genus.Gordonibacter.id.821	rs4596722	9	88787144	0.00527645	19.7378	A	G	0.102908	0.0231571	9.06e-06	3723	A	G	0.000131646	0.000131433	0.32	463010
genus.Gordonibacter.id.821	rs7220558	17	10148653	0.00661024	24.7604	A	T	0.116884	0.0234834	6.71e-07	3723	A	T	-9.57829e-06	0.000133917	0.94	463010
genus.Gordonibacter.id.821	rs7294633	12	29024534	0.00706786	26.4867	C	T	0.12867	0.0249946	3.44e-07	3723	C	T	-8.53446e-05	0.000144213	0.55	463010
genus.Haemophilus.id.3698	rs10840326	11	9951672	0.00224532	19.9968	C	G	-0.0677384	0.0151463	7.37e-06	8888	C	G	-0.000235886	0.000132058	0.0739997	463010
genus.Haemophilus.id.3698	rs12876183	13	85114550	0.0022015	20.0955	T	A	0.0749201	0.016711	9.62e-06	9110	T	A	4.87507e-05	0.000149812	0.74	463010
genus.Haemophilus.id.3698	rs4822728	22	26891808	0.00237835	21.7351	T	C	0.0705861	0.0151388	3.48e-06	9119	T	C	1.6291e-05	0.000135207	0.9	463010
genus.Haemophilus.id.3698	rs9328464	6	8350917	0.00258296	23.6098	T	C	0.0723095	0.0148799	1.42e-06	9119	T	C	-2.62435e-05	0.000130668	0.84	463010
genus.Haemophilus.id.3698	rs9382510	6	55448491	0.00320808	29.3358	C	T	-0.093521	0.0172649	7.12e-08	9117	C	T	0.000177108	0.000154992	0.25	463010
genus.Haemophilus.id.3698	rs9574096	13	36104947	0.00246202	22.4992	A	T	-0.0736375	0.0155227	2.18e-06	9118	A	T	-0.000216925	0.000136647	0.11	463010
genus.Holdemanella.id.11393	rs12415649	10	125021315	0.00252573	19.396	G	C	0.0839384	0.0190567	7.88e-06	7662	G	C	0.000124459	0.000153278	0.42	463010
genus.Holdemanella.id.11393	rs12513188	4	71000791	0.00277492	21.4208	G	A	0.0903906	0.0195276	4.65e-06	7700	G	A	-0.00026193	0.000165983	0.11	463010
genus.Holdemanella.id.11393	rs35228298	3	85392882	0.00283938	21.225	G	A	0.0934832	0.0202886	7.3e-06	7456	G	A	0.000222279	0.000160459	0.17	463010
genus.Holdemanella.id.11393	rs4541991	9	105004835	0.00296195	22.7411	T	C	-0.0927334	0.0194435	2.1e-06	7657	T	C	4.65561e-05	0.00016038	0.77	463010
genus.Holdemanella.id.11393	rs607782	6	4148609	0.00327754	24.5111	T	C	-0.0854214	0.0172515	7.19e-07	7456	T	C	0.000218335	0.000140254	0.12	463010
genus.Holdemanella.id.11393	rs73011279	19	15020095	0.00311185	23.2681	T	C	-0.0961669	0.0199336	1.36e-06	7456	T	C	0.000244184	0.000158859	0.12	463010
genus.Holdemanella.id.11393	rs761624	6	163603171	0.00369502	28.572	C	G	0.0959801	0.0179537	1.38e-07	7706	C	G	-3.21546e-05	0.000148139	0.83	463010
genus.Holdemanella.id.11393	rs8113760	19	43851935	0.00277606	20.7504	G	A	0.078999	0.01734	4.62e-06	7456	G	A	0.00024674	0.000137181	0.0719996	463010
genus.Holdemania.id.2157	rs11080063	17	26789271	0.00216068	19.7069	G	A	-0.0665238	0.0149837	6.67e-06	9103	G	A	5.20138e-05	0.000130808	0.69	463010
genus.Holdemania.id.2157	rs12701617	7	38292857	0.00214183	19.541	A	G	-0.0660617	0.0149427	9.52e-06	9106	A	G	-0.000201583	0.000132345	0.13	463010
genus.Holdemania.id.2157	rs1867876	11	18768068	0.00295636	27.0034	T	C	0.0842919	0.0162192	2.74e-07	9109	T	C	0.000128807	0.000145446	0.38	463010
genus.Holdemania.id.2157	rs4146507	5	106209093	0.00220934	20.1628	C	T	0.079488	0.0177002	7.23e-06	9108	C	T	0.000106624	0.000159874	0.5	463010
genus.Holdemania.id.2157	rs6133067	20	3839754	0.00292716	26.0137	T	C	0.0910829	0.0178561	5.17e-07	8863	T	C	-0.000253193	0.000166606	0.13	463010
genus.Holdemania.id.2157	rs9500080	6	105737322	0.00293886	26.8343	C	T	0.0926764	0.0178886	4.09e-07	9106	C	T	2.83565e-05	0.00015777	0.86	463010
genus.Holdemania.id.2157	rs9529719	13	70856516	0.00233131	21.2762	T	C	0.074038	0.0160494	5.97e-06	9107	T	C	0.000158825	0.000143289	0.27	463010
genus.Holdemania.id.2157	rs967319	3	60615680	0.0021812	19.9054	T	C	0.0788638	0.0176744	8.38e-06	9108	T	C	-0.000104006	0.000152408	0.49	463010
genus.Howardella.id.2000	rs12452946	17	17253288	0.00559213	21.3584	A	G	-0.105833	0.0228941	3.8e-06	3800	A	G	2.01893e-05	0.000131849	0.88	463010
genus.Howardella.id.2000	rs2154047	14	95456812	0.00576564	20.9985	C	A	-0.192557	0.0420093	9.97e-06	3623	C	A	-0.000185689	0.00018195	0.31	463010
genus.Howardella.id.2000	rs609430	4	169178315	0.00573782	21.9065	T	G	-0.112045	0.0239328	3.34e-06	3798	T	G	-6.04847e-05	0.000138892	0.66	463010
genus.Howardella.id.2000	rs61771805	1	72972799	0.00584498	21.2244	A	T	-0.136779	0.0296811	4.03e-06	3612	A	T	-0.00023959	0.000160197	0.13	463010
genus.Howardella.id.2000	rs901099	11	77901287	0.0069947	25.6753	T	G	-0.12718	0.0250924	6.53e-07	3647	T	G	0.000131694	0.000143258	0.36	463010
genus.Hungatella.id.11306	rs13249325	8	14853525	0.00463693	19.5984	T	G	-0.100023	0.0225883	9.69e-06	4209	T	G	4.47604e-05	0.000135497	0.74	463010
genus.Hungatella.id.11306	rs72759041	15	89577376	0.00507322	19.9272	G	T	-0.126025	0.0282242	3.86e-06	3910	G	T	-8.66343e-05	0.000154028	0.57	463010
genus.Intestinibacter.id.11345	rs10805326	4	14326193	0.00249748	30.7984	G	A	0.0775151	0.0139665	3.55e-08	12303	G	A	-8.43131e-06	0.0001452	0.95	463010
genus.Intestinibacter.id.11345	rs11109097	12	97928437	0.0017054	20.3016	C	T	0.0624272	0.0138539	5.49e-06	11886	C	T	6.06975e-05	0.000143118	0.67	463010
genus.Intestinibacter.id.11345	rs2098844	11	127703160	0.00163023	20.0667	C	T	-0.0575295	0.0128416	6.79e-06	12291	C	T	-9.37795e-05	0.000132245	0.48	463010
genus.Intestinibacter.id.11345	rs2702387	4	179361262	0.00172252	21.2046	A	G	0.0608559	0.0132145	4.26e-06	12291	A	G	7.33294e-05	0.000139034	0.6	463010
genus.Intestinibacter.id.11345	rs4327025	15	92446683	0.002234	27.5419	G	A	-0.0810346	0.0154397	1.64e-07	12303	G	A	2.20388e-05	0.000159756	0.89	463010
genus.Intestinibacter.id.11345	rs447950	5	148846426	0.00171554	21.1391	A	G	0.0628342	0.0136652	5.64e-06	12303	A	G	1.76073e-05	0.000142323	0.9	463010
genus.Intestinibacter.id.11345	rs68093214	3	70657785	0.00163996	19.5213	C	T	0.0662258	0.0149877	9.26e-06	11886	C	T	-8.02141e-05	0.000151847	0.6	463010
genus.Intestinibacter.id.11345	rs893394	2	20054971	0.00167227	19.9066	G	A	0.0583322	0.0130729	7.85e-06	11886	G	A	-0.000139894	0.000133757	0.3	463010
genus.Intestinimonas.id.2062	rs1000888	13	23343542	0.00161749	19.5838	C	G	-0.0585038	0.013219	9.71e-06	12090	C	G	0.000123835	0.000134621	0.36	463010
genus.Intestinimonas.id.2062	rs11258178	10	13124513	0.00205793	24.2595	A	G	0.0660742	0.0134139	6.98e-07	11766	A	G	0.00014379	0.000135827	0.29	463010
genus.Intestinimonas.id.2062	rs12566247	1	43767569	0.00183115	22.1498	T	A	0.0637084	0.0135355	2.19e-06	12076	T	A	-7.81327e-05	0.000139008	0.57	463010
genus.Intestinimonas.id.2062	rs1859797	7	22007303	0.00178004	20.9777	G	A	0.060368	0.0131793	4.12e-06	11766	G	A	-0.000269779	0.000132142	0.0409996	463010
genus.Intestinimonas.id.2062	rs2276760	3	150620956	0.00166744	20.1746	A	G	-0.0685233	0.0152546	7.84e-06	12081	A	G	-4.34254e-05	0.000159709	0.79	463010
genus.Intestinimonas.id.2062	rs2930225	16	85327902	0.00189181	22.7466	G	T	0.0729524	0.0152948	1.35e-06	12003	G	T	8.20711e-05	0.000147658	0.58	463010
genus.Intestinimonas.id.2062	rs6934519	6	67200802	0.00173261	20.9784	C	T	0.0692373	0.0151154	8.57e-06	12089	C	T	-5.53974e-05	0.000150115	0.709999	463010
genus.Intestinimonas.id.2062	rs7170984	15	93819735	0.00180464	21.8539	T	C	-0.0658116	0.0140767	2.98e-06	12090	T	C	8.89464e-05	0.000144468	0.54	463010
genus.Intestinimonas.id.2062	rs9823439	3	17187502	0.00166289	19.5948	T	C	-0.0581947	0.0131455	9.86e-06	11766	T	C	-8.262e-05	0.000132613	0.53	463010
genus.Lachnoclostridium.id.11308	rs12566975	1	185091351	0.00109137	19.5776	T	C	-0.0468097	0.0105787	9.57e-06	17921	T	C	1.14848e-05	0.000131256	0.93	463010
genus.Lachnoclostridium.id.11308	rs1528479	2	167244051	0.00113068	19.781	G	A	-0.0497798	0.0111919	9.64e-06	17477	G	A	0.000138775	0.000139859	0.32	463010
genus.Lachnoclostridium.id.11308	rs4738679	8	59370320	0.00116003	20.8106	G	A	-0.0520267	0.011404	4.42e-06	17921	G	A	0.00011439	0.000139276	0.41	463010
genus.Lachnoclostridium.id.11308	rs6112314	20	19300846	0.00150899	26.961	A	C	-0.0561715	0.0108174	2.43e-07	17842	A	C	-0.000364833	0.000134291	0.00659994	463010
genus.Lachnoclostridium.id.11308	rs615997	3	23037786	0.00128771	23.0913	T	C	0.0511752	0.0106491	2.03e-06	17911	T	C	0.000268896	0.000131733	0.0409996	463010
genus.Lachnoclostridium.id.11308	rs62028349	16	27217620	0.00109633	19.6677	G	C	0.0469989	0.0105971	9.17e-06	17922	G	C	0.000161445	0.00013296	0.22	463010
genus.Lachnospira.id.2004	rs2520509	12	91006514	0.00121664	20.0966	A	G	0.0519063	0.011578	7.42e-06	16500	A	G	-0.00015058	0.000140173	0.28	463010
genus.Lachnospira.id.2004	rs4686798	3	186445436	0.00132335	21.8576	T	C	0.0531826	0.0113747	2.74e-06	16497	T	C	0.000135071	0.0001357	0.32	463010
genus.Lachnospira.id.2004	rs4923324	11	25962890	0.00129722	21.4163	G	A	-0.0617321	0.0133387	2.44e-06	16490	G	A	0.000181434	0.000153706	0.24	463010
genus.Lachnospira.id.2004	rs56791201	2	57701660	0.00132765	21.9141	T	C	0.051823	0.0110697	2.93e-06	16486	T	C	-0.000108797	0.000131204	0.41	463010
genus.LachnospiraceaeFCS020group.id.11314	rs10093861	8	121244406	0.00159835	22.0445	G	A	-0.0568869	0.0121152	3.06e-06	13772	G	A	-4.44389e-05	0.000130958	0.73	463010
genus.LachnospiraceaeFCS020group.id.11314	rs2322265	4	166588085	0.00160572	22.1463	C	T	-0.0666305	0.0141577	5.21e-06	13772	C	T	1.33864e-05	0.00015418	0.93	463010
genus.LachnospiraceaeFCS020group.id.11314	rs2862811	3	165996415	0.00156125	21.532	T	C	0.0564927	0.0121736	3.92e-06	13772	T	C	0.000234806	0.000131841	0.0749998	463010
genus.LachnospiraceaeFCS020group.id.11314	rs3999074	10	65563647	0.00148041	20.4155	G	T	-0.0550587	0.0121847	6.55e-06	13772	G	T	-0.000145874	0.000132942	0.27	463010
genus.LachnospiraceaeFCS020group.id.11314	rs4452603	6	71966268	0.00146208	19.745	T	G	0.0604208	0.0135965	8.98e-06	13487	T	G	0.0001768	0.000148479	0.23	463010
genus.LachnospiraceaeFCS020group.id.11314	rs7249113	19	2571232	0.00191058	25.9034	G	A	0.0679483	0.0133496	3.72e-07	13534	G	A	2.10942e-05	0.000145329	0.88	463010
genus.LachnospiraceaeFCS020group.id.11314	rs9308097	4	165786478	0.00147891	20.0541	A	G	0.055381	0.0123659	7.47e-06	13542	A	G	-0.000197916	0.000133608	0.14	463010
genus.LachnospiraceaeFCS020group.id.11314	rs9788306	13	40419314	0.00167265	23.071	C	T	-0.062804	0.0130744	1.39e-06	13772	C	T	2.29196e-05	0.000143674	0.87	463010
genus.LachnospiraceaeFCS020group.id.11314	rs9919338	1	118425334	0.00152616	21.0413	G	C	-0.0553339	0.0120621	4.91e-06	13768	G	C	-3.28345e-05	0.000131307	0.8	463010
genus.LachnospiraceaeNC2004group.id.11316	rs12127733	1	234178160	0.00350863	21.9146	G	A	0.115182	0.0246006	3.11e-06	6226	G	A	-2.84609e-05	0.000166599	0.86	463010
genus.LachnospiraceaeNC2004group.id.11316	rs1331592	9	122239986	0.0032659	20.7278	C	G	0.0948806	0.0208369	5.34e-06	6328	C	G	-1.80707e-05	0.000157045	0.91	463010
genus.LachnospiraceaeNC2004group.id.11316	rs1928659	9	29334137	0.00370231	20.4904	T	C	0.102522	0.0226445	6.17e-06	5516	T	C	-0.000218264	0.000153332	0.15	463010
genus.LachnospiraceaeNC2004group.id.11316	rs1929743	13	76829562	0.00304771	19.3449	T	C	0.0837206	0.0190318	9.06e-06	6330	T	C	-6.06383e-05	0.000138121	0.66	463010
genus.LachnospiraceaeNC2004group.id.11316	rs3756315	5	149544722	0.00346308	21.9836	A	G	-0.0883469	0.0188397	3.33e-06	6328	A	G	1.32107e-05	0.000140395	0.93	463010
genus.LachnospiraceaeNC2004group.id.11316	rs6116753	20	5330700	0.00359064	22.616	G	A	0.0994748	0.0209139	2.92e-06	6278	G	A	-7.91686e-05	0.000150126	0.6	463010
genus.LachnospiraceaeND3007group.id.11317	rs13110238	4	7678735	0.0013372	20.1077	C	G	-0.0636978	0.0142041	4.48e-06	15019	C	G	1.2082e-05	0.000159389	0.94	463010
genus.LachnospiraceaeND3007group.id.11317	rs2861203	3	172950553	0.00131927	20.2155	G	A	0.0572304	0.0127279	7.37e-06	15305	G	A	-3.92477e-06	0.000146641	0.98	463010
genus.LachnospiraceaeND3007group.id.11317	rs9932954	16	1100633	0.0015393	23.4643	A	G	-0.0561864	0.0115984	1.25e-06	15222	A	G	0.000123324	0.000132009	0.35	463010
genus.LachnospiraceaeNK4A136group.id.11319	rs10952110	7	8497922	0.00117949	19.794	G	T	0.0487709	0.0109614	9.08e-06	16764	G	T	-4.58485e-05	0.000132331	0.73	463010
genus.LachnospiraceaeNK4A136group.id.11319	rs11263806	17	35240097	0.00116994	20.1864	A	G	-0.0524615	0.0116758	5.07e-06	17236	A	G	-6.58103e-05	0.00014281	0.64	463010
genus.LachnospiraceaeNK4A136group.id.11319	rs12362320	11	3922055	0.0014677	24.6378	G	C	0.0573168	0.0115466	8.04e-07	16764	G	C	-2.14278e-05	0.000137377	0.88	463010
genus.LachnospiraceaeNK4A136group.id.11319	rs160061	5	6116659	0.00130943	22.5936	A	G	0.0513831	0.0108094	2.12e-06	17234	A	G	3.13327e-05	0.000131392	0.81	463010
genus.LachnospiraceaeNK4A136group.id.11319	rs28540839	8	84735080	0.00125849	21.1214	A	C	0.0508285	0.0110591	9.34e-06	16764	A	C	4.77657e-05	0.000131218	0.719999	463010
genus.LachnospiraceaeNK4A136group.id.11319	rs2880566	17	30016653	0.0011486	19.8132	T	C	0.0599578	0.0134693	5.61e-06	17232	T	C	-0.000163127	0.000165071	0.32	463010
genus.LachnospiraceaeNK4A136group.id.11319	rs4955932	3	55181375	0.00117367	20.2508	T	C	-0.0492283	0.0109388	7.05e-06	17236	T	C	2.81915e-05	0.000136326	0.84	463010
genus.LachnospiraceaeNK4A136group.id.11319	rs68104925	14	100177681	0.00131289	22.6443	T	C	-0.0549104	0.0115385	2.37e-06	17227	T	C	0.000174196	0.000137005	0.2	463010
genus.LachnospiraceaeNK4A136group.id.11319	rs7073658	10	62175024	0.00120217	20.7432	T	G	-0.0499621	0.0109693	5.27e-06	17236	T	G	3.42159e-05	0.000134657	0.8	463010
genus.LachnospiraceaeNK4A136group.id.11319	rs954878	1	54578401	0.00132072	22.7795	A	G	-0.0520656	0.0109082	1.78e-06	17227	A	G	-0.000264658	0.000132482	0.0460002	463010
genus.LachnospiraceaeUCG001.id.11321	rs10815577	9	7273249	0.00222583	22.6359	C	G	-0.0683706	0.0143691	1.72e-06	10149	C	G	0.000148714	0.000134354	0.27	463010
genus.LachnospiraceaeUCG001.id.11321	rs2050911	1	82384407	0.00234287	23.8266	G	A	0.0751466	0.0153934	1.11e-06	10148	G	A	-0.000302076	0.000144031	0.0359998	463010
genus.LachnospiraceaeUCG001.id.11321	rs2371284	12	56256262	0.0020094	20.0519	T	C	-0.0761893	0.0170127	7.56e-06	9961	T	C	3.9013e-05	0.000158739	0.81	463010
genus.LachnospiraceaeUCG001.id.11321	rs437876	3	42568440	0.00288584	29.3703	T	C	0.0784637	0.0144768	7.17e-08	10150	T	C	0.00023788	0.000137052	0.0830004	463010
genus.LachnospiraceaeUCG001.id.11321	rs4981345	14	21455973	0.0020755	20.7129	T	C	-0.0681973	0.0149831	6.09e-06	9961	T	C	4.78061e-05	0.000138277	0.73	463010
genus.LachnospiraceaeUCG001.id.11321	rs62496417	7	96965504	0.00200681	20.4061	T	G	-0.0748504	0.0165681	5.88e-06	10150	T	G	0.000195046	0.000154281	0.21	463010
genus.LachnospiraceaeUCG001.id.11321	rs7341608	8	56849386	0.00196389	19.5103	T	C	-0.0784757	0.0177648	9.48e-06	9917	T	C	-8.19297e-05	0.000166446	0.62	463010
genus.LachnospiraceaeUCG001.id.11321	rs985416	3	148269083	0.0028637	28.4752	C	T	0.0970258	0.0181807	1.46e-07	9917	C	T	-3.77132e-05	0.000166647	0.82	463010
genus.LachnospiraceaeUCG004.id.11324	rs11128180	3	70592215	0.00147743	21.4011	A	G	0.0648288	0.0140126	4.52e-06	14466	A	G	2.75338e-05	0.000154353	0.86	463010
genus.LachnospiraceaeUCG004.id.11324	rs12673420	7	71303007	0.00151402	21.9274	G	A	0.0554351	0.0118375	2.98e-06	14463	G	A	-0.000106958	0.000132854	0.42	463010
genus.LachnospiraceaeUCG004.id.11324	rs12747809	1	240359089	0.00169025	24.4858	G	A	-0.062197	0.0125685	8.65e-07	14464	G	A	2.09089e-05	0.000140962	0.88	463010
genus.LachnospiraceaeUCG004.id.11324	rs12894272	14	40536481	0.0014799	21.4326	A	G	0.0579792	0.0125229	4.34e-06	14463	A	G	7.80097e-05	0.000139858	0.58	463010
genus.LachnospiraceaeUCG004.id.11324	rs2444793	6	81318836	0.00145432	21.0615	C	T	-0.0542433	0.0118188	4.77e-06	14463	C	T	-0.000106094	0.000131832	0.42	463010
genus.LachnospiraceaeUCG004.id.11324	rs2726805	4	183247601	0.00142158	20.591	A	G	0.0548397	0.0120844	6.3e-06	14466	A	G	-3.37482e-05	0.00013448	0.8	463010
genus.LachnospiraceaeUCG004.id.11324	rs2882478	2	49904589	0.00164125	23.7781	G	A	-0.0577091	0.0118338	1.21e-06	14466	G	A	2.54724e-05	0.00013276	0.85	463010
genus.LachnospiraceaeUCG004.id.11324	rs6656451	1	65990422	0.00142992	20.7005	C	T	-0.05436	0.011947	5.57e-06	14458	C	T	0.00024244	0.000131716	0.0659994	463010
genus.LachnospiraceaeUCG008.id.11328	rs10741777	11	19572557	0.00355081	24.987	T	C	-0.0973842	0.0194791	7.69e-07	7014	T	C	-0.000147527	0.000154117	0.34	463010
genus.LachnospiraceaeUCG008.id.11328	rs10793103	11	74391775	0.00410183	28.8805	C	T	0.0974344	0.0181279	9.35e-08	7014	C	T	4.51883e-05	0.000141877	0.75	463010
genus.LachnospiraceaeUCG008.id.11328	rs13024781	2	168628871	0.00317973	22.3738	T	C	-0.0798769	0.0168846	2.29e-06	7016	T	C	1.19207e-05	0.000132205	0.93	463010
genus.LachnospiraceaeUCG008.id.11328	rs57254474	8	23071054	0.00281896	19.8309	G	A	0.0886511	0.0199045	6.92e-06	7017	G	A	0.000157856	0.000153473	0.3	463010
genus.LachnospiraceaeUCG008.id.11328	rs62277846	2	228100140	0.00329751	23.2052	C	T	0.102292	0.0212319	1.59e-06	7016	C	T	9.07369e-05	0.000163818	0.58	463010
genus.LachnospiraceaeUCG008.id.11328	rs67078837	4	114220647	0.00348777	24.5489	T	C	-0.0845848	0.0170693	7.68e-07	7016	T	C	-0.000184665	0.000131922	0.16	463010
genus.LachnospiraceaeUCG010.id.11330	rs12346653	9	92267239	0.00172963	22.2019	C	T	0.0657686	0.0139569	2.7e-06	12816	C	T	3.52972e-05	0.000152721	0.82	463010
genus.LachnospiraceaeUCG010.id.11330	rs2153460	9	85577007	0.00144015	19.0864	A	T	-0.0684038	0.0156562	9.17e-06	13236	A	T	-7.23129e-05	0.000167513	0.67	463010
genus.LachnospiraceaeUCG010.id.11330	rs2833528	21	33193567	0.00146082	19.3564	C	T	-0.0562148	0.0127763	9.92e-06	13233	C	T	0.000280901	0.000136245	0.0389996	463010
genus.LachnospiraceaeUCG010.id.11330	rs4576377	7	81410263	0.00153049	20.2687	A	C	-0.0572001	0.0127043	7.63e-06	13225	A	C	6.55934e-05	0.000134825	0.630001	463010
genus.LachnospiraceaeUCG010.id.11330	rs9981767	21	44079875	0.00191809	24.6256	A	C	0.0655062	0.0131994	9.96e-07	12816	A	C	0.000161029	0.000141172	0.25	463010
genus.Lactobacillus.id.1837	rs11674854	2	28903275	0.00349464	23.3314	C	T	-0.0852686	0.0176504	1.59e-06	6655	C	T	9.12777e-05	0.00013529	0.5	463010
genus.Lactobacillus.id.1837	rs12693845	2	199312684	0.00295296	20.6016	C	T	-0.0805447	0.0177429	8.96e-06	6958	C	T	-0.000126489	0.000134312	0.35	463010
genus.Lactobacillus.id.1837	rs1530559	2	135755629	0.00304921	20.3484	G	A	0.0804001	0.0178207	4.93e-06	6655	G	A	-0.000109209	0.000132689	0.41	463010
genus.Lactobacillus.id.1837	rs328312	16	73890910	0.00331854	23.134	T	A	0.0815092	0.0169441	1.41e-06	6950	T	A	0.000224261	0.000131964	0.089	463010
genus.Lactobacillus.id.1837	rs6092149	20	54192992	0.00315185	21.8292	A	T	-0.0801344	0.017149	3.29e-06	6906	A	T	-0.000173818	0.0001327	0.19	463010
genus.Lactobacillus.id.1837	rs7399658	13	23834968	0.003513	23.3063	G	A	-0.107134	0.0221883	3.12e-06	6613	G	A	-0.000235635	0.000163169	0.15	463010
genus.Lactobacillus.id.1837	rs768253	8	69010103	0.00304499	21.2456	T	G	-0.079195	0.0171791	4.25e-06	6958	T	G	6.70944e-05	0.000134383	0.62	463010
genus.Lactobacillus.id.1837	rs921925	19	6928017	0.00336817	23.4879	A	C	0.0985077	0.0203229	9.72e-07	6952	A	C	-4.09441e-05	0.000161332	0.8	463010
genus.Lactococcus.id.1851	rs10417872	19	28767353	0.00570582	23.2641	T	G	0.118306	0.024522	1.29e-06	4056	T	G	2.12652e-06	0.000146792	0.99	463010
genus.Lactococcus.id.1851	rs123059	17	2699935	0.00654429	24.7555	T	C	-0.13671	0.0274694	1.27e-06	3760	T	C	-0.000101568	0.000155807	0.51	463010
genus.Lactococcus.id.1851	rs12621813	2	31266049	0.00500624	20.4025	G	A	0.108423	0.0239978	6.61e-06	4057	G	A	-1.44295e-05	0.000142727	0.92	463010
genus.Lactococcus.id.1851	rs34757988	18	64699550	0.00698545	28.5112	G	C	0.122294	0.0228976	8.95e-08	4055	G	C	-1.3172e-06	0.000134799	0.99	463010
genus.Lactococcus.id.1851	rs4766997	12	113161438	0.00566945	23.0979	C	T	0.114599	0.023839	2.06e-06	4053	C	T	2.27666e-05	0.000142747	0.87	463010
genus.Lactococcus.id.1851	rs757872	22	31532568	0.00682506	26.0447	G	C	0.140799	0.027582	4.37e-07	3792	G	C	-6.62026e-05	0.000157872	0.67	463010
genus.Lactococcus.id.1851	rs7992246	13	113472525	0.00500264	20.3877	T	C	0.104232	0.0230786	4.45e-06	4057	T	C	2.66378e-05	0.000136293	0.85	463010
genus.Marvinbryantia.id.2005	rs11645029	16	5938448	0.00181012	21.2295	G	C	-0.060618	0.0131551	4.15e-06	11709	G	C	-5.5035e-06	0.000132624	0.97	463010
genus.Marvinbryantia.id.2005	rs12963345	18	46255637	0.00173522	20.3495	G	C	-0.059681	0.0132289	6.6e-06	11709	G	C	-0.000218081	0.000144696	0.13	463010
genus.Marvinbryantia.id.2005	rs2724813	10	12519739	0.00216415	25.1759	A	G	-0.0840769	0.0167551	6.28e-07	11610	A	G	5.81428e-05	0.000164262	0.719999	463010
genus.Marvinbryantia.id.2005	rs2842896	6	132881664	0.00208967	24.515	C	T	-0.0649396	0.0131146	7.25e-07	11709	C	T	4.63164e-05	0.000134481	0.73	463010
genus.Marvinbryantia.id.2005	rs2863363	3	166039765	0.00181161	21.6844	A	G	0.0634861	0.0136323	3.11e-06	11950	A	G	0.0002221	0.000136422	0.1	463010
genus.Marvinbryantia.id.2005	rs3125832	1	211400180	0.00174581	20.4739	A	C	0.0679323	0.015012	5.03e-06	11709	A	C	6.68054e-05	0.000152046	0.66	463010
genus.Methanobrevibacter.id.123	rs10202904	2	125440268	0.00617426	22.2474	T	G	-0.112811	0.0239106	3.09e-06	3583	T	G	-5.73566e-05	0.000132917	0.67	463010
genus.Methanobrevibacter.id.124	rs11018665	11	89349287	0.00547551	19.7323	A	T	0.113013	0.0254343	7.03e-06	3586	A	T	0.000275324	0.000137272	0.0449997	463010
genus.Methanobrevibacter.id.125	rs1334944	10	112266046	0.00563712	20.318	T	C	0.115197	0.0255492	7.61e-06	3586	T	C	2.48661e-05	0.000139461	0.86	463010
genus.Methanobrevibacter.id.123	rs4779844	15	31516919	0.0054231	19.5369	G	C	0.109639	0.0247979	9.28e-06	3585	G	C	0.000129937	0.000136508	0.34	463010
genus.Odoribacter.id.952	rs10093869	8	1266824	0.00149121	21.2308	A	G	-0.0577795	0.0125389	3.67e-06	14218	A	G	-4.06417e-05	0.000139256	0.77	463010
genus.Odoribacter.id.952	rs10423795	19	49523088	0.0014593	20.6544	C	T	0.0550695	0.0121164	6.58e-06	14135	C	T	7.81735e-05	0.000133906	0.56	463010
genus.Odoribacter.id.952	rs4793970	17	46763962	0.00135395	19.9098	A	G	-0.0576329	0.0129154	6.03e-06	14687	A	G	-4.89278e-05	0.000145395	0.74	463010
genus.Odoribacter.id.952	rs503751	15	58063881	0.00189872	27.0435	C	G	0.0618294	0.0118887	2.08e-07	14218	C	G	-0.000119851	0.000131634	0.36	463010
genus.Olsenella.id.822	rs1035588	2	150077190	0.00554536	20.8386	A	G	-0.108148	0.0236848	4.86e-06	3739	A	G	0.000108722	0.00013662	0.43	463010
genus.Olsenella.id.822	rs17148768	10	10777085	0.00614891	22.5576	G	A	0.140434	0.0295602	2.2e-06	3648	G	A	0.000304841	0.000168064	0.0700003	463010
genus.Olsenella.id.822	rs2759329	1	231960352	0.00583552	21.9353	G	A	-0.111131	0.0237218	3.43e-06	3739	G	A	0.000115039	0.00013531	0.4	463010
genus.Olsenella.id.822	rs6046522	20	19969568	0.00556758	20.7322	C	T	0.122938	0.0269928	4.48e-06	3705	C	T	-0.000293581	0.000150481	0.051	463010
genus.Olsenella.id.822	rs61090148	4	174810498	0.00545678	20.5039	A	G	-0.104783	0.0231343	6.44e-06	3739	A	G	-8.08627e-06	0.000132633	0.95	463010
genus.Olsenella.id.822	rs7540303	1	179629191	0.00555654	20.8808	C	T	0.108044	0.023638	5.32e-06	3739	C	T	-0.000116978	0.000133862	0.38	463010
genus.Olsenella.id.822	rs8066522	17	59632873	0.00522529	19.6295	G	A	-0.106529	0.0240379	9.7e-06	3739	G	A	7.03122e-05	0.000138563	0.61	463010
genus.Olsenella.id.822	rs9460691	6	10422207	0.00530508	19.9308	C	A	0.119966	0.0268645	7.28e-06	3739	C	A	-0.000365576	0.000157999	0.021	463010
genus.Oscillibacter.id.2063	rs11990279	8	11116314	0.00244444	20.8923	T	C	-0.0824934	0.0180457	4.94e-06	8528	T	C	4.71331e-05	0.000154136	0.760001	463010
genus.Oscillibacter.id.2063	rs12417956	11	25973451	0.00227511	20.3539	C	G	0.0785431	0.0174075	6.03e-06	8928	C	G	-0.000100175	0.000154081	0.52	463010
genus.Oscillibacter.id.2063	rs133832	22	44834707	0.00268076	23.9874	A	C	-0.0795527	0.0162411	1.15e-06	8926	A	C	-8.54753e-05	0.000140713	0.54	463010
genus.Oscillibacter.id.2063	rs234108	1	184942671	0.00276624	24.1109	A	G	0.0749553	0.0152632	9.16e-07	8694	A	G	-5.67961e-05	0.000131738	0.67	463010
genus.Oscillibacter.id.2063	rs36095275	14	32270129	0.00263914	23.0001	C	T	-0.0752368	0.0156861	1.4e-06	8694	C	T	4.23871e-05	0.000136747	0.760001	463010
genus.Oscillibacter.id.2063	rs4506202	8	21598077	0.00250408	21.8201	A	G	-0.0711323	0.0152261	3.21e-06	8694	A	G	-0.000175726	0.000132199	0.18	463010
genus.Oscillibacter.id.2063	rs62206502	20	18003390	0.0022768	20.2664	C	A	-0.0681423	0.0151349	6.6e-06	8883	C	A	3.08638e-07	0.000132059	1	463010
genus.Oscillibacter.id.2063	rs6901560	6	36931994	0.0024482	20.9172	C	G	0.0855032	0.018693	6.21e-06	8525	C	G	-7.5537e-05	0.000163296	0.64	463010
genus.Oscillibacter.id.2063	rs9393920	6	28580593	0.00271311	24.2885	A	G	-0.0744662	0.0151081	9.92e-07	8930	A	G	0.000139402	0.000131338	0.29	463010
genus.Oscillospira.id.2064	rs1954532	14	28151415	0.00225359	22.2232	T	C	-0.0826246	0.0175252	2.27e-06	9841	T	C	0.000162309	0.000165577	0.33	463010
genus.Oscillospira.id.2064	rs73038677	3	172373615	0.00238164	24.334	T	A	-0.08321	0.0168666	1.09e-06	10195	T	A	7.65541e-06	0.000163086	0.96	463010
genus.Oscillospira.id.2064	rs751183	1	76803093	0.00205007	20.2121	T	C	-0.0774322	0.0172216	6.85e-06	9841	T	C	0.000182201	0.000162812	0.26	463010
genus.Oscillospira.id.2064	rs8076323	17	14881860	0.00204481	20.8814	A	G	0.0715392	0.0156539	5.61e-06	10193	A	G	-4.73767e-05	0.000150363	0.75	463010
genus.Oxalobacter.id.2978	rs4428215	3	171947435	0.00617658	28.9183	G	A	0.130293	0.0242237	7.51e-08	4655	G	A	5.38866e-05	0.000156805	0.73	463010
genus.Oxalobacter.id.2978	rs6000536	22	37421469	0.00569099	26.626	C	T	-0.130992	0.0253804	2.06e-07	4654	C	T	-2.87349e-05	0.000164233	0.86	463010
genus.Oxalobacter.id.2978	rs6071435	20	59502888	0.00517455	24.0984	T	A	-0.105512	0.021489	1.07e-06	4635	T	A	-0.000176933	0.000135659	0.19	463010
genus.Oxalobacter.id.2978	rs736744	9	87514407	0.0066441	31.1218	C	T	0.117882	0.0211262	2.57e-08	4655	C	T	-9.98498e-05	0.000134132	0.46	463010
genus.Parabacteroides.id.954	rs17141986	16	7045276	0.00119608	20.1457	G	C	0.0500303	0.0111459	7.27e-06	16825	G	C	0.000243985	0.000134215	0.0690001	463010
genus.Parabacteroides.id.954	rs3860755	5	169360155	0.00132567	22.954	G	C	0.0558784	0.0116625	1.71e-06	17294	G	C	5.24949e-05	0.000143419	0.709999	463010
genus.Paraprevotella.id.962	rs10842464	12	25249743	0.00268223	19.2994	T	C	-0.0758215	0.0172568	6.6e-06	7178	T	C	0.000102571	0.000132522	0.44	463010
genus.Paraprevotella.id.962	rs17109926	12	72012653	0.00290325	20.8973	A	G	-0.0988335	0.0216172	6.75e-06	7179	A	G	-0.000157042	0.000165606	0.34	463010
genus.Paraprevotella.id.962	rs3801748	7	81759508	0.00286465	20.6187	G	A	0.0779721	0.0171691	5.2e-06	7179	G	A	5.81097e-05	0.000135903	0.67	463010
genus.Paraprevotella.id.962	rs4767113	12	114131978	0.00332901	23.0402	C	T	0.0882466	0.018382	2.14e-06	6900	C	T	-1.91753e-05	0.000143396	0.89	463010
genus.Paraprevotella.id.962	rs9602779	13	86166204	0.00325849	23.4561	A	C	-0.106692	0.0220264	6.93e-07	7177	A	C	0.000112796	0.00016248	0.49	463010
genus.Paraprevotella.id.962	rs9900242	17	69135631	0.00342294	23.6926	A	G	-0.0852967	0.0175212	1.14e-06	6900	A	G	2.00146e-05	0.000133026	0.88	463010
genus.Parasutterella.id.2892	rs10899911	10	44293839	0.00205346	23.4247	A	G	-0.0717102	0.0148151	1.15e-06	11386	A	G	0.000121624	0.000145931	0.4	463010
genus.Parasutterella.id.2892	rs11715853	3	30163689	0.00180478	20.5828	G	A	-0.0662952	0.0146114	6.23e-06	11386	G	A	-4.5879e-05	0.000145134	0.75	463010
genus.Parasutterella.id.2892	rs1403396	12	126498824	0.00198595	22.6371	A	T	-0.0756729	0.0159035	2.76e-06	11378	A	T	-0.000181696	0.000156933	0.25	463010
genus.Parasutterella.id.2892	rs2387977	20	25599776	0.00225117	25.5927	T	C	-0.0681778	0.0134756	5.38e-07	11345	T	C	-5.13901e-05	0.000138055	0.709999	463010
genus.Parasutterella.id.2892	rs35414597	4	15565736	0.00203519	23.2158	T	A	-0.0684946	0.0142143	1.51e-06	11386	T	A	-5.88019e-05	0.000139839	0.67	463010
genus.Parasutterella.id.2892	rs6809952	3	193896709	0.00185681	20.6024	G	A	-0.0684957	0.0150892	8.13e-06	11077	G	A	9.16656e-05	0.000144651	0.53	463010
genus.Parasutterella.id.2892	rs6828768	4	65556925	0.00202043	23.0472	C	T	0.0636852	0.0132645	1.78e-06	11386	C	T	3.13639e-05	0.000130941	0.81	463010
genus.Parasutterella.id.2892	rs7303158	12	5275540	0.00203468	23.2101	C	T	0.0646859	0.0134256	1.33e-06	11386	C	T	-5.32448e-05	0.000132029	0.69	463010
genus.Parasutterella.id.2892	rs7311004	12	53260710	0.00179621	20.4812	T	C	-0.0617522	0.0136438	5.92e-06	11384	T	C	0.000160552	0.000134624	0.23	463010
genus.Parasutterella.id.2892	rs7572229	2	72235444	0.00218519	24.9242	G	A	0.066273	0.0132736	6.32e-07	11383	G	A	0.000119589	0.000131672	0.36	463010
genus.Parasutterella.id.2892	rs8039785	15	67316307	0.00189529	21.6113	T	G	0.0618345	0.0133	3.62e-06	11383	T	G	0.000118926	0.000131258	0.36	463010
genus.Parasutterella.id.2892	rs823424	8	16674526	0.00181133	20.6576	G	A	-0.0713448	0.0156958	4.95e-06	11386	G	A	0.000120927	0.000158755	0.450001	463010
genus.Peptococcus.id.2037	rs10031059	4	35358594	0.0051818	28.7734	T	C	-0.121167	0.0225844	1.24e-07	5526	T	C	-6.43987e-05	0.000155467	0.68	463010
genus.Peptococcus.id.2037	rs2054133	2	33691809	0.00398017	22.5978	G	A	0.0895433	0.0188332	2.14e-06	5657	G	A	-4.87498e-07	0.000132678	1	463010
genus.Peptococcus.id.2037	rs413827	14	57985112	0.00391328	21.529	G	A	0.110229	0.0237523	3.3e-06	5482	G	A	-9.47832e-05	0.000162696	0.56	463010
genus.Peptococcus.id.2037	rs7033353	9	104595848	0.00396606	22.5174	T	G	0.090152	0.018995	2.22e-06	5657	T	G	-0.000112235	0.000133469	0.4	463010
genus.Peptococcus.id.2037	rs7766680	6	162239191	0.00366569	20.7984	G	C	0.0976832	0.0214155	3.51e-06	5655	G	C	-0.000147722	0.000146293	0.31	463010
genus.Phascolarctobacterium.id.2168	rs11929846	4	17051156	0.0017496	19.4756	T	C	-0.0697199	0.0157969	8.88e-06	11114	T	C	-0.000185446	0.00016097	0.25	463010
genus.Phascolarctobacterium.id.2168	rs12618201	2	174436533	0.001936	21.5526	A	G	0.0641657	0.0138202	3.38e-06	11113	A	G	0.000163572	0.000136381	0.23	463010
genus.Phascolarctobacterium.id.2168	rs1264476	8	102434276	0.00191966	21.353	T	G	0.0767335	0.0166041	4.3e-06	11104	T	G	7.63648e-05	0.000162134	0.64	463010
genus.Phascolarctobacterium.id.2168	rs6427992	1	203102563	0.00202179	22.5097	G	C	-0.0652458	0.0137508	2.09e-06	11113	G	C	-3.3439e-05	0.000133639	0.8	463010
genus.Phascolarctobacterium.id.2168	rs7982713	13	71376322	0.001849	19.8358	G	A	0.0726922	0.0163201	9.72e-06	10710	G	A	-2.94952e-07	0.000160064	1	463010
genus.Prevotella7.id.11182	rs12124567	1	3343802	0.00588887	19.4358	A	G	-0.121281	0.0275017	9.49e-06	3283	A	G	0.000473573	0.00014609	0.0012	463010
genus.Prevotella7.id.11182	rs2240542	2	242066314	0.00607137	21.3002	C	T	0.12085	0.0261776	4.84e-06	3489	C	T	0.000275409	0.000145143	0.0580003	463010
genus.Prevotella7.id.11182	rs2918132	10	133000320	0.00605937	20.2153	C	T	-0.114648	0.0254916	6.42e-06	3318	C	T	-7.91785e-06	0.00013667	0.95	463010
genus.Prevotella7.id.11182	rs430270	3	60474379	0.0065703	21.9312	A	C	0.139155	0.0297055	2.87e-06	3318	A	C	4.76163e-05	0.000166857	0.780001	463010
genus.Prevotella7.id.11182	rs57404562	2	12110020	0.00689285	24.1883	C	A	0.155486	0.0316057	6.22e-07	3487	C	A	-0.000152784	0.00016531	0.36	463010
genus.Prevotella7.id.11182	rs9426434	1	29736216	0.00590601	19.7007	T	C	-0.123657	0.0278514	9.72e-06	3318	T	C	0.000187764	0.000151026	0.21	463010
genus.Prevotella7.id.11182	rs9959718	18	71442664	0.00664324	23.3199	G	A	0.133012	0.0275361	1.9e-06	3489	G	A	0.000151368	0.000151001	0.32	463010
genus.Prevotella9.id.11183	rs11199734	10	122819400	0.00200874	20.6532	A	T	0.0770209	0.0169462	7e-06	10263	A	T	1.69176e-05	0.000161217	0.92	463010
genus.Prevotella9.id.11183	rs1304512	5	63736025	0.00214841	21.0739	G	A	0.0761593	0.0165885	5.29e-06	9790	G	A	-5.81154e-05	0.000154778	0.709999	463010
genus.Prevotella9.id.11183	rs16966465	15	38513730	0.00196718	20.221	G	C	0.0743348	0.0165291	9.33e-06	10261	G	C	3.01319e-05	0.00016179	0.85	463010
genus.Prevotella9.id.11183	rs2683313	8	19115604	0.00222147	22.8386	A	G	-0.0724576	0.0151603	1.69e-06	10260	A	G	-0.000110567	0.000140318	0.43	463010
genus.Prevotella9.id.11183	rs4968431	17	59421778	0.00191586	19.7118	G	T	0.0640113	0.0144162	8.58e-06	10271	G	T	9.73828e-05	0.000134959	0.47	463010
genus.Prevotella9.id.11183	rs7232121	18	19993452	0.00220786	21.6583	G	C	0.0671292	0.014423	3.76e-06	9790	G	C	-0.000188498	0.000133479	0.16	463010
genus.Prevotella9.id.11183	rs9428102	1	118852817	0.00190281	19.5639	A	G	-0.0778844	0.0176068	4.62e-06	10264	A	G	0.000126005	0.000160197	0.43	463010
genus.RikenellaceaeRC9gutgroup.id.11191	rs12501673	4	163830516	0.00587361	19.6865	A	G	0.116395	0.0262253	6.29e-06	3334	A	G	-9.59159e-05	0.000137333	0.48	463010
genus.RikenellaceaeRC9gutgroup.id.11191	rs2998141	10	135010198	0.00645772	21.631	T	C	-0.136346	0.0293073	4.42e-06	3330	T	C	9.84393e-05	0.00016327	0.55	463010
genus.RikenellaceaeRC9gutgroup.id.11191	rs4270579	4	84698188	0.00565992	18.9491	G	A	-0.118021	0.0271041	5.46e-06	3331	G	A	9.90056e-05	0.000146723	0.5	463010
genus.RikenellaceaeRC9gutgroup.id.11191	rs4717843	7	73334987	0.00647709	20.9792	G	T	-0.119376	0.0260548	4.72e-06	3220	G	T	5.82017e-05	0.000137555	0.67	463010
genus.RikenellaceaeRC9gutgroup.id.11191	rs7113155	11	102429543	0.00635467	21.3092	G	C	0.114423	0.0247798	5.26e-06	3334	G	C	5.51197e-06	0.000132104	0.97	463010
genus.RikenellaceaeRC9gutgroup.id.11191	rs7193937	16	76605358	0.00618191	20.0171	G	C	0.124153	0.027741	6.19e-06	3220	G	C	-0.000261137	0.000156892	0.0959997	463010
genus.RikenellaceaeRC9gutgroup.id.11191	rs9887954	1	164800873	0.00634752	21.2595	G	A	-0.114849	0.0249013	4.81e-06	3330	G	A	-0.00012762	0.000133627	0.34	463010
genus.Romboutsia.id.11347	rs10279978	7	5319387	0.0016764	23.7458	A	G	-0.0622202	0.0127675	1.17e-06	14143	A	G	-0.000316744	0.000141398	0.025	463010
genus.Romboutsia.id.11347	rs34302036	7	78136725	0.00145979	20.7345	A	G	0.0550261	0.0120835	5.88e-06	14185	A	G	1.63395e-05	0.000132771	0.9	463010
genus.Romboutsia.id.11347	rs9567264	13	32720756	0.00145743	20.6937	C	T	0.0580018	0.0127495	5.76e-06	14180	C	T	-6.32651e-05	0.000143325	0.66	463010
genus.Roseburia.id.2012	rs147990086	1	145655256	0.0010706	19.1178	A	G	-0.0578936	0.01324	8.93e-06	17840	A	G	0.000173193	0.000156807	0.27	463010
genus.Roseburia.id.2012	rs2034589	16	8307948	0.00145521	26.0047	G	C	0.0629765	0.0123489	5.01e-07	17846	G	C	0.000280789	0.000159189	0.0779992	463010
genus.Roseburia.id.2012	rs2160994	12	50650057	0.00137217	23.9663	T	C	0.0550687	0.0112481	9.7e-07	17444	T	C	0.000155353	0.000137223	0.26	463010
genus.Roseburia.id.2012	rs2943022	5	89598914	0.00119668	21.3887	T	C	0.0493786	0.0106763	4.11e-06	17854	T	C	8.8084e-05	0.000132667	0.51	463010
genus.Roseburia.id.2012	rs4748237	10	16051097	0.00117849	21.0597	G	C	0.0488326	0.0106404	4.67e-06	17851	G	C	2.4242e-05	0.000132376	0.85	463010
genus.Roseburia.id.2012	rs6445851	3	57116228	0.00118305	21.1413	G	A	-0.0497336	0.0108158	3.53e-06	17851	G	A	-2.2872e-05	0.000134109	0.86	463010
genus.Roseburia.id.2012	rs9300744	13	103117486	0.00121576	21.7301	C	T	-0.0588452	0.0126228	4.75e-06	17854	C	T	-0.000135472	0.000154932	0.38	463010
genus.Ruminiclostridium5.id.11355	rs10827477	10	35262588	0.00129739	22.5896	A	G	-0.0547387	0.0115163	2.19e-06	17391	A	G	1.45509e-05	0.000140797	0.92	463010
genus.Ruminiclostridium5.id.11355	rs1223978	13	108775162	0.00114956	20.0011	T	C	0.0484169	0.0108254	8.16e-06	17381	T	C	2.45588e-05	0.000133869	0.85	463010
genus.Ruminiclostridium5.id.11355	rs2286384	12	1891043	0.00133773	23.297	G	C	-0.0518814	0.0107482	1.44e-06	17394	G	C	-0.00010007	0.000131345	0.450001	463010
genus.Ruminiclostridium5.id.11355	rs243585	21	19151940	0.00138475	23.4402	C	G	-0.0585939	0.0121017	1.33e-06	16906	C	G	0.000100635	0.00015207	0.51	463010
genus.Ruminiclostridium5.id.11355	rs2482038	10	12835085	0.00130686	22.7613	C	A	0.0518991	0.0108777	1.7e-06	17396	C	A	0.000139049	0.000132084	0.29	463010
genus.Ruminiclostridium5.id.11355	rs2791343	8	131316030	0.00119512	20.808	T	C	0.051717	0.0113369	5.54e-06	17392	T	C	0.000122681	0.000139564	0.38	463010
genus.Ruminiclostridium5.id.11355	rs2801960	1	41878680	0.00117669	20.4809	C	G	0.0520975	0.0115111	6.21e-06	17387	C	G	-5.52843e-05	0.000141949	0.7	463010
genus.Ruminiclostridium5.id.11355	rs2833828	21	33811886	0.00116481	20.2856	G	A	0.0489617	0.0108702	6.82e-06	17397	G	A	-3.31912e-05	0.000132944	0.8	463010
genus.Ruminiclostridium6.id.11356	rs11992182	8	79766499	0.00153478	20.5653	A	C	0.0625299	0.0137876	4.65e-06	13381	A	C	1.24149e-05	0.000147746	0.93	463010
genus.Ruminiclostridium6.id.11356	rs2548459	19	49209339	0.00152503	20.4285	C	T	0.0554866	0.0122755	6.4e-06	13377	C	T	0.000334238	0.000131242	0.0109999	463010
genus.Ruminiclostridium6.id.11356	rs73176030	7	101271282	0.0014725	19.7252	T	C	0.058665	0.013208	7.29e-06	13378	T	C	0.000126844	0.000139856	0.36	463010
genus.Ruminiclostridium6.id.11356	rs792058	2	5548605	0.00150757	19.5238	G	A	0.0554234	0.0125423	8.58e-06	12933	G	A	5.82364e-05	0.000134105	0.66	463010
genus.Ruminiclostridium9.id.11357	rs113048721	9	74214419	0.00122359	20.4799	C	G	0.0600735	0.0132737	4.1e-06	16719	C	G	-0.000148963	0.000152476	0.33	463010
genus.Ruminiclostridium9.id.11357	rs12040548	1	247710285	0.00129806	21.7304	G	T	0.0570422	0.0122359	3.15e-06	16721	G	T	5.19225e-05	0.000147841	0.73	463010
genus.Ruminiclostridium9.id.11357	rs13033315	2	204706865	0.00125712	21.0481	T	A	0.0511195	0.0111418	5.68e-06	16724	T	A	0.000111276	0.000132492	0.4	463010
genus.Ruminiclostridium9.id.11357	rs57665991	3	157841287	0.00161487	27.0491	C	G	-0.0641507	0.0123339	2.07e-07	16725	C	G	0.000246951	0.000143433	0.0850002	463010
genus.Ruminiclostridium9.id.11357	rs6082461	20	2210530	0.00120204	20.0357	A	C	0.0586425	0.0131004	4.87e-06	16650	A	C	-4.51663e-05	0.00016038	0.780001	463010
genus.Ruminiclostridium9.id.11357	rs7137760	12	10702414	0.00122464	20.501	C	T	0.050797	0.0112182	7.07e-06	16722	C	T	0.000113943	0.000133658	0.39	463010
genus.Ruminiclostridium9.id.11357	rs74303178	8	14697544	0.00119276	19.9477	T	C	0.0532742	0.0119274	7.92e-06	16706	T	C	-0.000223537	0.00014424	0.12	463010
genus.RuminococcaceaeNK4A214group.id.11358	rs11241747	5	123846318	0.00133276	19.7779	C	T	0.0533858	0.0120035	6.59e-06	14822	C	T	3.66613e-05	0.000135537	0.79	463010
genus.RuminococcaceaeNK4A214group.id.11358	rs12642039	4	159932022	0.00140232	21.449	T	C	-0.0553003	0.0119397	3.43e-06	15276	T	C	0.000139362	0.000137721	0.31	463010
genus.RuminococcaceaeNK4A214group.id.11358	rs12731	2	239087912	0.00137405	21.0326	A	G	-0.0527684	0.0115053	4.87e-06	15288	A	G	-0.000136645	0.000132011	0.3	463010
genus.RuminococcaceaeNK4A214group.id.11358	rs13087692	3	84725039	0.00135988	20.8154	T	G	0.0574623	0.012594	8.69e-06	15288	T	G	-0.000137266	0.000141964	0.33	463010
genus.RuminococcaceaeNK4A214group.id.11358	rs136761	22	49796014	0.00163759	24.3089	G	A	-0.0587521	0.0119155	8.15e-07	14822	G	A	0.000168907	0.000134898	0.21	463010
genus.RuminococcaceaeNK4A214group.id.11358	rs62027366	16	24073806	0.0013474	19.9954	T	C	0.0615389	0.0137612	6.58e-06	14822	T	C	-0.000251723	0.000157936	0.11	463010
genus.RuminococcaceaeUCG002.id.11360	rs11750293	5	123822114	0.00134531	23.0249	G	T	-0.0578304	0.0120512	1.76e-06	17094	G	T	-2.40647e-05	0.00014698	0.87	463010
genus.RuminococcaceaeUCG002.id.11360	rs12463378	19	54475808	0.00127493	21.6912	A	G	-0.0522061	0.0112086	2.96e-06	16994	A	G	0.000219495	0.000134729	0.1	463010
genus.RuminococcaceaeUCG002.id.11360	rs2265670	1	190171640	0.00128421	21.9805	C	G	-0.0512404	0.0109287	2.99e-06	17096	C	G	0.000407968	0.000131604	0.00189998	463010
genus.RuminococcaceaeUCG002.id.11360	rs362417	14	73589896	0.00120133	20.5614	G	C	-0.054863	0.0120984	7.8e-06	17097	G	C	-0.000124882	0.000145638	0.39	463010
genus.RuminococcaceaeUCG002.id.11360	rs6542556	2	120757853	0.00116702	19.97	A	G	0.050974	0.011406	7.86e-06	17094	A	G	7.30176e-05	0.000136948	0.59	463010
genus.RuminococcaceaeUCG002.id.11360	rs67746927	4	12207874	0.00144851	24.1512	C	G	-0.054237	0.0110357	9.17e-07	16651	C	G	-6.42608e-05	0.00013249	0.630001	463010
genus.RuminococcaceaeUCG002.id.11360	rs6793778	3	24045453	0.00116254	19.8932	C	T	-0.0558706	0.0125258	9.81e-06	17094	C	T	6.65251e-05	0.000154183	0.67	463010
genus.RuminococcaceaeUCG002.id.11360	rs7155595	14	77502546	0.00138733	23.7312	C	A	0.0569929	0.0116986	1.15e-06	17084	C	A	-0.000191503	0.000140397	0.17	463010
genus.RuminococcaceaeUCG002.id.11360	rs7249614	19	43637890	0.00118635	19.7751	A	G	-0.0492778	0.0110807	9.07e-06	16651	A	G	-0.000117671	0.000134082	0.38	463010
genus.RuminococcaceaeUCG002.id.11360	rs7342369	12	129451330	0.00124129	20.6919	C	A	-0.0527803	0.0116023	5.66e-06	16651	C	A	-8.74267e-05	0.000140447	0.53	463010
genus.RuminococcaceaeUCG002.id.11360	rs77564310	15	80713184	0.00150537	25.6268	A	C	-0.0713093	0.0140855	3.29e-07	17000	A	C	-1.26385e-05	0.000164628	0.94	463010
genus.RuminococcaceaeUCG003.id.11361	rs10490280	2	37905976	0.00156811	21.9912	C	T	-0.0672094	0.0143309	4.16e-06	14004	C	T	-0.000136581	0.000153405	0.37	463010
genus.RuminococcaceaeUCG003.id.11361	rs139730	22	25292719	0.0013941	19.5475	G	C	-0.0577655	0.0130645	9.72e-06	14004	G	C	3.14714e-05	0.000149273	0.83	463010
genus.RuminococcaceaeUCG003.id.11361	rs16959793	15	35071718	0.00157207	22.6892	A	C	-0.062527	0.0131259	2.22e-06	14412	A	C	6.68803e-05	0.000148014	0.649999	463010
genus.RuminococcaceaeUCG003.id.11361	rs2523124	7	97348436	0.00141849	20.4652	T	C	-0.0546625	0.0120823	5.78e-06	14409	T	C	-4.09341e-05	0.000136183	0.760001	463010
genus.RuminococcaceaeUCG003.id.11361	rs3013089	1	13794594	0.00145529	20.9955	G	A	-0.0551473	0.0120346	4.38e-06	14408	G	A	0.000181691	0.000133813	0.17	463010
genus.RuminococcaceaeUCG003.id.11361	rs4452755	8	82026852	0.00153675	22.1694	A	C	-0.0634463	0.0134741	3.29e-06	14406	A	C	-1.46209e-05	0.000147013	0.92	463010
genus.RuminococcaceaeUCG003.id.11361	rs4629039	18	46485154	0.00141291	20.3776	T	A	0.0553742	0.0122659	6.54e-06	14404	T	A	-9.16607e-05	0.00013843	0.51	463010
genus.RuminococcaceaeUCG003.id.11361	rs646327	19	49209851	0.00170241	24.5633	G	A	0.0586696	0.011837	7.83e-07	14406	G	A	0.000355573	0.000131257	0.00669993	463010
genus.RuminococcaceaeUCG004.id.11362	rs11961899	6	132887921	0.00202068	19.2333	G	A	-0.0707825	0.0161381	9.18e-06	9501	G	A	0.00010486	0.000144785	0.47	463010
genus.RuminococcaceaeUCG004.id.11362	rs2248146	7	24791998	0.00211452	20.1306	T	C	0.0689452	0.0153649	8.2e-06	9502	T	C	-2.72592e-05	0.000140431	0.85	463010
genus.RuminococcaceaeUCG004.id.11362	rs3800154	6	2119329	0.00214066	20.1739	A	C	-0.0797959	0.0177639	6.12e-06	9406	A	C	0.000138095	0.000168122	0.41	463010
genus.RuminococcaceaeUCG004.id.11362	rs511258	3	169966722	0.00228269	21.7306	G	A	-0.0757474	0.0162475	4.52e-06	9500	G	A	-0.000346272	0.00014703	0.0189998	463010
genus.RuminococcaceaeUCG004.id.11362	rs550351	1	18676399	0.0020022	19.051	A	C	0.078587	0.018003	9.43e-06	9498	A	C	0.000242163	0.000188002	0.2	463010
genus.RuminococcaceaeUCG004.id.11362	rs6769553	3	54427795	0.00305624	29.1202	A	G	0.0849743	0.0157451	7.91e-08	9501	A	G	0.000218181	0.000144506	0.13	463010
genus.RuminococcaceaeUCG004.id.11362	rs7123615	11	15771251	0.0020126	19.1582	C	G	-0.0786157	0.0179592	7.09e-06	9502	C	G	-0.000207809	0.000162054	0.2	463010
genus.RuminococcaceaeUCG004.id.11362	rs7569771	2	239846337	0.00208666	19.8647	A	G	-0.075914	0.0170308	8.12e-06	9502	A	G	0.00010394	0.000159448	0.51	463010
genus.RuminococcaceaeUCG004.id.11362	rs9818949	3	197683751	0.00227362	20.769	G	T	0.0859927	0.0188671	5.39e-06	9116	G	T	-6.68556e-05	0.000170525	0.7	463010
genus.RuminococcaceaeUCG005.id.11363	rs10950694	7	18026604	0.00161672	25.6164	T	C	0.0577628	0.011412	4.3e-07	15821	T	C	-0.000140032	0.000133367	0.29	463010
genus.RuminococcaceaeUCG005.id.11363	rs12288512	11	27747671	0.0013752	21.305	A	G	0.066635	0.0144356	3.1e-06	15473	A	G	-0.000124956	0.000162174	0.44	463010
genus.RuminococcaceaeUCG005.id.11363	rs394449	17	7034575	0.00137844	21.7072	A	T	0.0692909	0.0148712	2.6e-06	15728	A	T	-0.000214145	0.000166841	0.2	463010
genus.RuminococcaceaeUCG005.id.11363	rs7449320	5	154003091	0.0013013	20.9691	C	A	0.0599163	0.0130836	4.81e-06	16095	C	A	5.14331e-05	0.000158513	0.75	463010
genus.RuminococcaceaeUCG005.id.11363	rs7555878	1	187906034	0.00136031	21.928	A	G	0.0586677	0.0125277	2.81e-06	16100	A	G	3.67802e-05	0.000149188	0.81	463010
genus.RuminococcaceaeUCG009.id.11366	rs113006825	6	51803869	0.00277483	19.9314	T	C	-0.0928893	0.0208035	7.98e-06	7165	T	C	0.000114458	0.000161688	0.48	463010
genus.RuminococcaceaeUCG009.id.11366	rs12508214	4	7426937	0.00279157	21.0206	C	T	-0.0774649	0.0168937	4.75e-06	7511	C	T	0.000196659	0.000138512	0.16	463010
genus.RuminococcaceaeUCG009.id.11366	rs2058609	12	12970792	0.00289928	21.8311	A	G	0.0816464	0.017472	3.12e-06	7510	A	G	1.75011e-05	0.000138065	0.9	463010
genus.RuminococcaceaeUCG009.id.11366	rs2192926	2	75512668	0.00282655	21.2847	A	G	-0.089048	0.0192989	4.88e-06	7511	A	G	3.77257e-05	0.000155729	0.81	463010
genus.RuminococcaceaeUCG009.id.11366	rs4079028	1	202299085	0.0028121	21.0882	C	T	0.0915623	0.019936	3.28e-06	7480	C	T	4.52436e-05	0.000161527	0.780001	463010
genus.RuminococcaceaeUCG009.id.11366	rs4708333	6	78106701	0.003069	23.1161	T	G	-0.084033	0.0174757	1.56e-06	7511	T	G	5.50564e-05	0.000143082	0.7	463010
genus.RuminococcaceaeUCG009.id.11366	rs6952765	7	32001710	0.00255892	19.2643	G	A	0.0732099	0.0166777	8.13e-06	7511	G	A	-5.09722e-05	0.000132457	0.7	463010
genus.RuminococcaceaeUCG009.id.11366	rs9558661	13	106650093	0.00266721	19.9988	T	C	-0.0897823	0.0200739	7.01e-06	7480	T	C	0.000170458	0.000164891	0.3	463010
genus.RuminococcaceaeUCG010.id.11367	rs12597105	16	5233941	0.00173513	21.5756	G	A	0.0670855	0.0144415	4.87e-06	12415	G	A	2.98032e-05	0.000146587	0.84	463010
genus.RuminococcaceaeUCG010.id.11367	rs2820282	6	104728618	0.00171698	22.1235	A	C	-0.0592304	0.0125917	2.85e-06	12865	A	C	0.000223569	0.000132453	0.0909997	463010
genus.RuminococcaceaeUCG010.id.11367	rs35506912	15	36607072	0.0017163	21.9909	G	C	-0.0693743	0.0147926	3.21e-06	12793	G	C	5.91734e-05	0.00015675	0.709999	463010
genus.RuminococcaceaeUCG010.id.11367	rs682403	9	135968557	0.00172716	22.2531	A	G	-0.0588161	0.0124671	2.37e-06	12864	A	G	4.66577e-05	0.000131119	0.719999	463010
genus.RuminococcaceaeUCG010.id.11367	rs6958419	7	16349864	0.00170326	21.955	C	T	-0.0585718	0.0124994	2.84e-06	12870	C	T	5.52472e-05	0.000131209	0.67	463010
genus.RuminococcaceaeUCG010.id.11367	rs7441445	4	40707798	0.00157447	20.2639	C	T	-0.05695	0.0126502	6.8e-06	12852	C	T	-0.000136217	0.000133813	0.31	463010
genus.RuminococcaceaeUCG010.id.11367	rs7935775	11	130676996	0.00162552	20.9415	A	T	-0.0631351	0.0137953	4.99e-06	12864	A	T	-0.000151718	0.00014501	0.3	463010
genus.RuminococcaceaeUCG011.id.11368	rs10274562	7	11222521	0.00563177	20.5591	C	T	0.110917	0.0244556	6.5e-06	3632	C	T	5.16597e-05	0.000137373	0.709999	463010
genus.RuminococcaceaeUCG011.id.11368	rs12636310	3	185469491	0.00606054	22.1339	G	A	0.132725	0.0282037	2.81e-06	3632	G	A	-0.000232598	0.000159904	0.15	463010
genus.RuminococcaceaeUCG011.id.11368	rs12724320	1	179370499	0.00643526	23.5113	C	T	-0.120881	0.0249229	1.52e-06	3632	C	T	0.000193181	0.000141451	0.17	463010
genus.RuminococcaceaeUCG011.id.11368	rs2729556	7	111763988	0.00596442	21.7808	C	T	-0.109097	0.0233699	3.19e-06	3632	C	T	1.62682e-05	0.000131333	0.9	463010
genus.RuminococcaceaeUCG011.id.11368	rs4490371	3	76205107	0.00555667	20.1605	T	C	-0.111816	0.0248963	7.75e-06	3610	T	C	0.000111931	0.000138299	0.42	463010
genus.RuminococcaceaeUCG013.id.11370	rs12485353	3	197049996	0.00128536	21.5819	G	A	-0.0607903	0.0130847	4.19e-06	16771	G	A	-5.60856e-06	0.000161648	0.97	463010
genus.RuminococcaceaeUCG013.id.11370	rs12781711	10	2219930	0.00185645	31.1906	C	T	-0.0656129	0.0117477	2.55e-08	16772	C	T	-0.000112589	0.000137907	0.41	463010
genus.RuminococcaceaeUCG013.id.11370	rs1729063	16	10863459	0.0011833	19.5097	G	C	-0.0533411	0.0120757	9.64e-06	16470	G	C	-3.32771e-05	0.000142905	0.82	463010
genus.RuminococcaceaeUCG013.id.11370	rs2428106	9	136620584	0.00118825	19.9458	C	G	-0.0490863	0.0109903	8.38e-06	16768	C	G	0.00010529	0.000132825	0.43	463010
genus.RuminococcaceaeUCG013.id.11370	rs2730183	8	40311885	0.00117739	19.7681	G	A	-0.0488692	0.0109907	8.44e-06	16772	G	A	0.000245586	0.000131338	0.061	463010
genus.RuminococcaceaeUCG013.id.11370	rs4385846	10	115650278	0.00122743	20.6092	G	T	0.0598405	0.0131807	6.46e-06	16772	G	T	5.07271e-05	0.000155253	0.74	463010
genus.RuminococcaceaeUCG013.id.11370	rs7784330	7	32530997	0.00117771	19.7712	G	A	-0.0498329	0.0112066	8.16e-06	16770	G	A	6.74497e-05	0.000134358	0.62	463010
genus.RuminococcaceaeUCG013.id.11370	rs9565219	13	76583319	0.00118299	19.8622	T	A	-0.0524592	0.0117701	8.73e-06	16772	T	A	2.35545e-05	0.000139875	0.87	463010
genus.RuminococcaceaeUCG014.id.11371	rs12638134	3	101334609	0.00164293	23.6987	T	G	0.0582548	0.0119657	1.21e-06	14403	T	G	0.000172224	0.000133828	0.2	463010
genus.RuminococcaceaeUCG014.id.11371	rs439810	2	119467367	0.00143906	20.7538	G	C	-0.0577127	0.0126675	7.04e-06	14403	G	C	5.95549e-05	0.000139633	0.67	463010
genus.RuminococcaceaeUCG014.id.11371	rs61898819	11	126024042	0.00133784	19.1876	A	T	0.0607865	0.0138761	9.92e-06	14325	A	T	2.26307e-06	0.000152864	0.99	463010
genus.RuminococcaceaeUCG014.id.11371	rs62478832	7	109564034	0.0014142	20.2928	T	A	-0.058129	0.012903	6.04e-06	14331	T	A	1.27197e-05	0.000143738	0.93	463010
genus.RuminococcaceaeUCG014.id.11371	rs72809222	2	57205854	0.00165492	23.0747	T	C	0.0671775	0.0139838	2.41e-06	13922	T	C	-2.89296e-05	0.000149375	0.85	463010
genus.RuminococcaceaeUCG014.id.11371	rs77627087	16	87765970	0.00140589	20.2565	C	G	0.067562	0.0150103	7.43e-06	14390	C	G	9.14025e-05	0.000167343	0.58	463010
genus.RuminococcaceaeUCG014.id.11371	rs853612	10	119928413	0.00135794	19.5823	A	G	-0.0528257	0.0119367	9.75e-06	14403	A	G	0.000268175	0.000133676	0.0449997	463010
genus.RuminococcaceaeUCG014.id.11371	rs995642	2	134854659	0.00156417	22.5593	C	T	0.060048	0.0126417	1.9e-06	14402	C	T	-0.000189194	0.00014257	0.18	463010
genus.Ruminococcus1.id.11373	rs10167839	2	181882879	0.0012001	19.9492	A	G	0.0519509	0.0116306	8.09e-06	16605	A	G	0.000103888	0.000138822	0.450001	463010
genus.Ruminococcus1.id.11373	rs10769159	11	45688595	0.00203428	33.84	G	C	-0.0640277	0.0110059	5.29e-09	16603	G	C	4.34347e-05	0.000131213	0.74	463010
genus.Ruminococcus1.id.11373	rs6105066	20	13258628	0.0012724	20.4442	T	C	-0.0607052	0.013425	5.06e-06	16049	T	C	-8.96177e-05	0.000157495	0.57	463010
genus.Ruminococcus1.id.11373	rs6493760	15	55439182	0.00132124	21.3318	C	T	0.0535262	0.0115885	3.38e-06	16126	C	T	-0.000325588	0.00013533	0.016	463010
genus.Ruminococcus1.id.11373	rs7583465	2	10533921	0.00132162	21.9495	C	T	0.0527654	0.0112619	2.56e-06	16588	C	T	-0.00013711	0.000133717	0.31	463010
genus.Ruminococcus2.id.11374	rs12406309	1	108074445	0.00128447	19.7252	A	C	-0.063193	0.0142275	9.79e-06	15339	A	C	0.000164779	0.000164724	0.32	463010
genus.Ruminococcus2.id.11374	rs12986628	2	238103439	0.00153169	22.5688	C	T	0.0665937	0.0140168	2.14e-06	14714	C	T	-0.000226803	0.000156531	0.15	463010
genus.Ruminococcus2.id.11374	rs2846589	18	862477	0.00134666	20.1219	G	T	0.0522093	0.0116382	7.59e-06	14924	G	T	5.51546e-05	0.000132732	0.68	463010
genus.Ruminococcus2.id.11374	rs2997412	13	62067781	0.0014061	21.5915	A	G	-0.0568439	0.0122325	4.22e-06	15336	A	G	-9.51736e-05	0.000139418	0.49	463010
genus.Ruminococcus2.id.11374	rs4400279	7	16804578	0.0013472	20.6817	A	G	0.0546114	0.0120077	5.8e-06	15333	A	G	0.000117994	0.000136406	0.39	463010
genus.Ruminococcus2.id.11374	rs61791565	4	24655463	0.00130253	19.9769	T	C	-0.0523503	0.0117119	6.79e-06	15319	T	C	0.000154691	0.000133607	0.25	463010
genus.Ruminococcus2.id.11374	rs7635831	3	173040924	0.00153645	22.9622	G	A	0.0618344	0.0129031	1.98e-06	14924	G	A	2.938e-05	0.000148916	0.84	463010
genus.Sellimonas.id.14369	rs13417181	2	174308394	0.00792405	24.3214	T	C	0.166509	0.0337521	7.62e-07	3047	T	C	-0.000288611	0.00019011	0.13	463010
genus.Sellimonas.id.14369	rs2016057	15	52105282	0.00759841	24.1336	A	C	-0.125878	0.0256153	1.03e-06	3154	A	C	0.000130023	0.000134621	0.33	463010
genus.Sellimonas.id.14369	rs2371572	2	213214174	0.00810446	25.754	A	C	0.127349	0.0250862	4.46e-07	3154	A	C	-0.000116812	0.0001318	0.38	463010
genus.Sellimonas.id.14369	rs41816	7	106250164	0.00649729	20.6134	A	G	0.132201	0.0291087	8.39e-06	3154	A	G	-4.08007e-05	0.000151746	0.79	463010
genus.Sellimonas.id.14369	rs4600608	2	180278564	0.00663279	20.6522	A	G	-0.137152	0.0301702	4.95e-06	3095	A	G	-8.14474e-05	0.00015703	0.6	463010
genus.Sellimonas.id.14369	rs56203279	7	111501524	0.00669122	21.2328	T	C	-0.124045	0.0269115	3.72e-06	3154	T	C	-0.00033831	0.000140702	0.016	463010
genus.Sellimonas.id.14369	rs7968030	12	100709313	0.0065857	20.5046	A	T	-0.12711	0.0280617	5.56e-06	3095	A	T	-0.000149695	0.000146477	0.31	463010
genus.Senegalimassilia.id.11160	rs11787826	9	34332382	0.00325077	22.572	C	A	0.081327	0.0171154	2.63e-06	6923	C	A	2.56629e-05	0.000131421	0.85	463010
genus.Senegalimassilia.id.11160	rs13383270	2	220831701	0.00296129	20.5559	G	C	0.0774679	0.017084	6.04e-06	6923	G	C	-4.34273e-05	0.000132696	0.74	463010
genus.Senegalimassilia.id.11160	rs2017373	14	34431996	0.00281848	19.5618	C	T	0.0782258	0.0176841	9.5e-06	6923	C	T	-0.000129691	0.000135771	0.34	463010
genus.Senegalimassilia.id.11160	rs57512504	13	19489214	0.00325917	22.6305	T	A	0.0819494	0.0172241	2.03e-06	6923	T	A	9.59152e-07	0.000132345	0.99	463010
genus.Senegalimassilia.id.11160	rs7225245	17	48379615	0.00310786	21.5766	G	A	0.079173	0.0170421	4.18e-06	6923	G	A	-5.84678e-05	0.000137297	0.67	463010
genus.Senegalimassilia.id.11160	rs72887800	17	74949284	0.00315442	21.9008	T	A	-0.0822462	0.0175721	2.42e-06	6923	T	A	0.000177827	0.000135283	0.19	463010
genus.Slackia.id.825	rs10409783	19	4555786	0.00339873	20.2539	A	G	0.0950828	0.0211239	7.7e-06	5941	A	G	0.000246584	0.000154909	0.11	463010
genus.Slackia.id.825	rs12440440	15	34041896	0.00368039	22.3893	A	G	0.0901934	0.0190582	2.63e-06	6063	A	G	-3.5498e-06	0.000139629	0.98	463010
genus.Slackia.id.825	rs4492265	7	13523683	0.00367014	22.3267	A	G	-0.0905757	0.0191658	2.41e-06	6063	A	G	7.4743e-05	0.000138417	0.59	463010
genus.Slackia.id.825	rs58767323	4	57167507	0.00337107	20.5012	G	C	-0.102833	0.0227077	4.6e-06	6063	G	C	3.1342e-05	0.000160513	0.85	463010
genus.Slackia.id.825	rs8901	17	74267010	0.00411107	25.0201	C	T	0.0934594	0.0186813	6.07e-07	6063	C	T	-0.000117514	0.000134879	0.38	463010
genus.Streptococcus.id.1853	rs10448310	9	93556174	0.00131942	21.6433	A	G	-0.0517935	0.0111324	3.31e-06	16384	A	G	0.000278505	0.000132043	0.0350002	463010
genus.Streptococcus.id.1853	rs1918540	11	131649446	0.0013211	21.6563	G	A	0.059639	0.0128148	2.44e-06	16373	G	A	-0.000162942	0.00015195	0.28	463010
genus.Streptococcus.id.1853	rs4968759	17	61298020	0.00128781	21.1242	A	G	-0.0515109	0.0112068	3.78e-06	16384	A	G	-0.000135774	0.000132319	0.3	463010
genus.Streptococcus.id.1853	rs6806351	3	132058723	0.00134515	21.5123	T	C	-0.0633829	0.0136647	4.94e-06	15973	T	C	-5.10724e-05	0.000155813	0.74	463010
genus.Subdoligranulum.id.2070	rs10065321	5	141857415	0.00127777	22.5009	T	C	-0.0512828	0.0108105	2.1e-06	17589	T	C	0.000125592	0.000133489	0.35	463010
genus.Subdoligranulum.id.2070	rs10497836	2	200288718	0.00110768	19.4912	C	T	-0.0524065	0.0118697	8.38e-06	17579	C	T	6.3249e-05	0.00014765	0.67	463010
genus.Subdoligranulum.id.2070	rs12638227	3	62327558	0.00153311	26.3531	G	C	-0.0557288	0.0108552	2.48e-07	17165	G	C	-6.30547e-05	0.000131918	0.630001	463010
genus.Subdoligranulum.id.2070	rs1667315	2	232408743	0.00115722	20.3721	G	A	0.0485017	0.0107452	6.72e-06	17586	G	A	-3.5875e-05	0.000132622	0.79	463010
genus.Subdoligranulum.id.2070	rs35940633	14	86933898	0.00122571	21.5745	G	A	-0.0511008	0.011001	4.22e-06	17582	G	A	-5.48789e-05	0.00013567	0.69	463010
genus.Subdoligranulum.id.2070	rs3761728	4	48990885	0.0011883	20.901	T	G	-0.0543458	0.0118866	3.87e-06	17570	T	G	0.00017695	0.000142917	0.22	463010
genus.Sutterella.id.2896	rs11591622	10	102520687	0.00163806	20.6767	T	G	-0.0688382	0.0151375	6.5e-06	12604	T	G	-2.06859e-05	0.00015253	0.89	463010
genus.Sutterella.id.2896	rs13173038	5	58499183	0.00169044	22.4245	A	G	-0.0718076	0.0151627	2.73e-06	13245	A	G	0.000125714	0.000162191	0.44	463010
genus.Sutterella.id.2896	rs2050185	6	147936781	0.00150418	19.9469	G	A	0.0575138	0.0128766	7.97e-06	13243	G	A	0.000162396	0.000136204	0.23	463010
genus.Sutterella.id.2896	rs2321387	13	58689340	0.00170805	22.6704	G	A	-0.0592876	0.0124509	1.87e-06	13252	G	A	-0.000172106	0.000132512	0.19	463010
genus.Sutterella.id.2896	rs2613606	7	111285025	0.00151663	20.1214	C	T	-0.0556794	0.0124117	7.2e-06	13249	C	T	-0.000315553	0.000132363	0.017	463010
genus.Sutterella.id.2896	rs607327	11	111695709	0.00151327	20.0797	C	T	0.0578334	0.0129053	6.63e-06	13251	C	T	-0.000251106	0.000135723	0.064	463010
genus.Sutterella.id.2896	rs62501473	7	150126751	0.00168873	21.5846	G	A	0.0694233	0.0149416	5.52e-06	12762	G	A	-0.000365223	0.000152837	0.017	463010
genus.Sutterella.id.2896	rs7499539	16	85038065	0.00167354	22.215	A	G	0.0617478	0.0130998	2.36e-06	13254	A	G	-6.32655e-05	0.000142386	0.66	463010
genus.Sutterella.id.2896	rs7638039	3	70588939	0.0015188	20.1304	T	C	0.0645624	0.0143887	8.66e-06	13236	T	C	-1.12608e-05	0.000152614	0.94	463010
genus.Sutterella.id.2896	rs9350083	6	18583878	0.0014773	19.6062	T	G	-0.0593069	0.0133929	8.23e-06	13254	T	G	-2.65558e-05	0.000142266	0.85	463010
genus.Terrisporobacter.id.11348	rs2569953	3	144148905	0.00296287	19.7171	A	C	-0.0775591	0.0174641	8.95e-06	6637	A	C	1.53962e-05	0.000131911	0.91	463010
genus.Terrisporobacter.id.11348	rs2872237	19	17026940	0.00322105	21.4246	C	A	-0.0814505	0.0175943	3.97e-06	6632	C	A	3.47649e-06	0.000134077	0.98	463010
genus.Terrisporobacter.id.11348	rs7034891	9	117245252	0.00317997	21.1409	G	C	-0.0799209	0.0173794	4.54e-06	6629	G	C	1.9288e-05	0.000131792	0.88	463010
genus.Terrisporobacter.id.11348	rs7184125	16	15920394	0.00315448	19.7146	T	C	0.091256	0.0205493	8.48e-06	6232	T	C	-2.90024e-05	0.000158297	0.85	463010
genus.Turicibacter.id.2162	rs2221441	5	170048048	0.00245221	21.4309	G	C	0.0710364	0.015343	3.46e-06	8720	G	C	0.000336513	0.000136552	0.0140001	463010
genus.Turicibacter.id.2162	rs2952020	8	26027842	0.00233741	20.9618	G	A	-0.0759019	0.0165764	5.63e-06	8949	G	A	0.000118042	0.000147224	0.42	463010
genus.Turicibacter.id.2162	rs4247078	15	92605098	0.00233525	20.9401	C	G	0.0710377	0.0155221	5.46e-06	8948	C	G	-7.56029e-05	0.00013802	0.58	463010
genus.Turicibacter.id.2162	rs61265175	11	1681862	0.00238322	21.3545	G	C	-0.0858591	0.0185778	4.14e-06	8941	G	C	-4.82426e-05	0.000160837	0.760001	463010
genus.Turicibacter.id.2162	rs7199484	16	49826299	0.00232507	20.8485	G	A	-0.0731428	0.0160172	5.77e-06	8948	G	A	0.000117136	0.000142295	0.41	463010
genus.Tyzzerella3.id.11335	rs55799124	17	3738781	0.00426515	22.9591	A	G	-0.11435	0.0238604	1.34e-06	5362	A	G	-0.000144315	0.000156646	0.36	463010
genus.Tyzzerella3.id.11335	rs67476743	19	1030320	0.00710688	35.4022	T	G	0.132164	0.022208	3.74e-09	4948	T	G	-0.000113134	0.000144218	0.43	463010
genus.Veillonella.id.2198	rs11141494	9	89306305	0.00216736	20.1763	G	A	-0.0783421	0.0174393	9.75e-06	9291	G	A	-0.000333378	0.000159805	0.0369999	463010
genus.Veillonella.id.2198	rs11614532	12	129984555	0.00240871	20.3037	G	C	0.0744538	0.0165214	7.13e-06	8411	G	C	4.35268e-05	0.000140039	0.760001	463010
genus.Veillonella.id.2198	rs12679709	8	13253770	0.00248878	23.1735	C	G	-0.0793499	0.0164818	1.78e-06	9290	C	G	1.0276e-05	0.000145162	0.94	463010
genus.Veillonella.id.2198	rs1882878	21	30010673	0.0023656	22.0049	A	G	-0.0768966	0.0163908	2.98e-06	9282	A	G	-0.000179733	0.000149251	0.23	463010
genus.Veillonella.id.2198	rs2013594	11	44302154	0.00231894	21.5721	T	C	-0.0720698	0.0155153	3.42e-06	9283	T	C	0.00013845	0.000140745	0.33	463010
genus.Veillonella.id.2198	rs62376424	5	119914285	0.00240926	21.7284	C	T	-0.0762216	0.0163499	3.65e-06	8999	C	T	-3.21697e-06	0.000139222	0.98	463010
genus.Veillonella.id.2198	rs6656807	1	178945043	0.0023121	20.8502	A	G	0.0703062	0.0153954	5.5e-06	8999	A	G	-7.64288e-05	0.000136144	0.57	463010
genus.Veillonella.id.2198	rs742016	22	45604800	0.00227281	21.1329	A	G	-0.0688571	0.0149769	4.66e-06	9279	A	G	0.000176197	0.000132745	0.18	463010
genus.Veillonella.id.2198	rs7645873	3	125544032	0.00230932	21.4894	A	T	0.0761385	0.0164228	3.12e-06	9286	A	T	-9.65895e-05	0.000144356	0.5	463010
genus.Victivallis.id.2256	rs11899949	2	38049069	0.00681057	22.3273	G	A	0.130568	0.0276239	2.77e-06	3258	G	A	-5.54191e-06	0.000150282	0.97	463010
genus.Victivallis.id.2256	rs173120	13	72876881	0.00647679	21.2585	T	C	0.13381	0.0290127	7.65e-06	3263	T	C	0.000142628	0.00015288	0.35	463010
genus.Victivallis.id.2256	rs1882775	21	40405606	0.00596445	19.5368	A	G	-0.13827	0.031273	8.73e-06	3258	A	G	7.59047e-05	0.000164651	0.64	463010
genus.Victivallis.id.2256	rs2546432	5	180579462	0.0059951	19.686	T	C	-0.110803	0.0249655	9.93e-06	3266	T	C	-1.9255e-05	0.000132157	0.88	463010
genus.Victivallis.id.2256	rs4764863	12	102514184	0.00741755	24.3918	G	A	0.121561	0.0246058	8.22e-07	3266	G	A	5.14834e-05	0.000131065	0.69	463010
genus.Victivallis.id.2256	rs4895919	6	131630319	0.00681034	22.2991	T	C	-0.116918	0.0247515	2.75e-06	3254	T	C	-0.000123309	0.000131802	0.35	463010
genus.Victivallis.id.2256	rs6445926	3	57723877	0.00667549	21.942	G	C	0.117031	0.0249764	2.96e-06	3267	G	C	-9.94663e-05	0.000133918	0.46	463010
genus.Victivallis.id.2256	rs911666	14	96071125	0.00617673	20.2924	T	C	-0.118576	0.0263146	7.65e-06	3267	T	C	-0.000228438	0.000139295	0.1	463010
order.Actinomycetales.id.420	rs2889192	9	76394568	0.00265848	20.5489	G	T	0.0884052	0.0194997	3.97e-06	7711	G	T	0.000270861	0.000156139	0.0830004	463010
order.Actinomycetales.id.420	rs4073240	6	169224781	0.00268099	20.7233	G	A	0.074973	0.0164672	5.68e-06	7711	G	A	-0.000272763	0.000134814	0.0430002	463010
order.Actinomycetales.id.420	rs58484246	15	29850991	0.00260411	20.1275	T	C	0.075828	0.0168997	6.67e-06	7711	T	C	0.000153642	0.000137792	0.26	463010
order.Bacillales.id.1674	rs10233278	7	117496144	0.00671757	21.8918	T	C	-0.116319	0.0248527	3.51e-06	3239	T	C	-0.000138426	0.00013348	0.3	463010
order.Bacillales.id.1674	rs10410917	19	14970441	0.00645675	21.0363	T	C	0.11471	0.0250025	5.57e-06	3239	T	C	-0.000230072	0.00013295	0.0840001	463010
order.Bacillales.id.1674	rs11207728	1	61827534	0.00638219	20.7918	G	A	-0.14455	0.0316912	5.73e-06	3239	G	A	3.52305e-05	0.000162435	0.83	463010
order.Bacteroidales.id.913	rs11146701	10	39062269	0.00110668	20.1839	A	G	0.0473596	0.010541	7.08e-06	18220	A	G	3.11793e-05	0.00013314	0.81	463010
order.Bacteroidales.id.913	rs17343978	22	27433885	0.00114773	21.0645	A	C	-0.0552057	0.0120278	8.36e-06	18334	A	C	-9.76057e-05	0.000150896	0.52	463010
order.Bacteroidales.id.913	rs2032750	2	53831026	0.00126746	22.6542	T	C	-0.0508393	0.0106807	1.92e-06	17853	T	C	-4.99256e-06	0.000131785	0.97	463010
order.Bacteroidales.id.913	rs4916508	3	195936789	0.00107074	19.6392	G	A	-0.0466729	0.0105312	8.47e-06	18324	G	A	-0.000194326	0.000131899	0.14	463010
order.Bacteroidales.id.913	rs7546249	1	176792690	0.00125015	22.9452	T	A	-0.0567113	0.0118386	1.55e-06	18333	T	A	-0.000124556	0.000147168	0.4	463010
order.Bacteroidales.id.913	rs929878	16	74290641	0.00110994	20.3701	C	T	-0.0548532	0.012153	4.73e-06	18334	C	T	-0.000115908	0.000148976	0.44	463010
order.Bifidobacteriales.id.432	rs10831953	11	13098051	0.00126352	18.8668	G	A	0.0537537	0.0123746	9.95e-06	14915	G	A	-6.06763e-05	0.000137331	0.66	463010
order.Bifidobacteriales.id.432	rs10841473	12	20378911	0.00151559	22.6347	G	C	-0.0613031	0.0128844	2.28e-06	14914	G	C	9.93001e-05	0.000149269	0.51	463010
order.Bifidobacteriales.id.432	rs10857328	4	161211924	0.00132377	19.7676	T	A	0.0562	0.0126395	7.24e-06	14915	T	A	-3.87342e-05	0.000143159	0.79	463010
order.Bifidobacteriales.id.432	rs13020688	2	192878532	0.00154457	22.8841	G	A	0.0584045	0.0122081	1.57e-06	14795	G	A	0.000170193	0.00013573	0.21	463010
order.Bifidobacteriales.id.432	rs182549	2	136616754	0.0056913	85.3602	C	T	0.11707	0.0126703	5.94e-20	14915	C	T	-0.000264001	0.000148028	0.0749998	463010
order.Bifidobacteriales.id.432	rs4567981	2	49906864	0.00163465	24.2209	T	A	0.0577763	0.0117388	8.88e-07	14795	T	A	1.24491e-06	0.000133546	0.99	463010
order.Bifidobacteriales.id.432	rs4957061	5	521096	0.00160347	23.7582	T	C	0.0569873	0.0116907	1.15e-06	14795	T	C	4.95976e-05	0.000132765	0.709999	463010
order.Bifidobacteriales.id.432	rs540489	17	72897722	0.00142475	20.9538	T	G	-0.0632518	0.013817	5.37e-06	14688	T	G	9.43641e-05	0.000155372	0.54	463010
order.Bifidobacteriales.id.432	rs55888705	4	1517826	0.00132662	19.8088	A	G	0.053673	0.0120586	8.66e-06	14914	A	G	-0.000142122	0.000136065	0.3	463010
order.Bifidobacteriales.id.432	rs7174549	15	92463303	0.00131171	19.5872	C	T	0.0551726	0.0124655	6.87e-06	14915	C	T	-0.000117443	0.000139598	0.4	463010
order.Bifidobacteriales.id.432	rs857444	6	14617591	0.00141112	21.0723	C	T	0.0553965	0.0120669	3.82e-06	14914	C	T	8.61124e-05	0.000137779	0.53	463010
order.Burkholderiales.id.2874	rs1928341	1	153240013	0.00123173	21.0812	A	G	0.0507782	0.0110587	4.52e-06	17096	A	G	9.84087e-06	0.000132865	0.94	463010
order.Burkholderiales.id.2874	rs2321387	13	58689340	0.00125796	21.5294	G	A	-0.0508514	0.0109588	3.26e-06	17095	G	A	-0.000172106	0.000132512	0.19	463010
order.Burkholderiales.id.2874	rs2367850	3	193456274	0.0014092	23.5133	G	C	0.06333	0.0130595	1.24e-06	16664	G	C	-3.83612e-06	0.000169244	0.98	463010
order.Burkholderiales.id.2874	rs2613606	7	111285025	0.00122152	20.9013	C	T	-0.0499561	0.0109264	4.13e-06	17092	C	T	-0.000315553	0.000132363	0.017	463010
order.Burkholderiales.id.2874	rs62191117	2	239900775	0.00154985	26.3464	A	G	0.0679995	0.0132471	2.79e-07	16975	A	G	7.1495e-05	0.000161812	0.66	463010
order.Burkholderiales.id.2874	rs7638039	3	70588939	0.00122914	21.0146	T	C	0.0580987	0.012673	4.84e-06	17078	T	C	-1.12608e-05	0.000152614	0.94	463010
order.Burkholderiales.id.2874	rs9964679	18	26569901	0.0012171	20.8316	A	G	0.052509	0.011504	6.06e-06	17097	A	G	-0.000209108	0.000144585	0.15	463010
order.Clostridiales.id.1863	rs10774377	12	5942519	0.00114977	21.0972	A	G	0.0523003	0.0113859	3.81e-06	18330	A	G	-0.000106069	0.000143107	0.46	463010
order.Clostridiales.id.1863	rs112334273	21	40703251	0.00138063	25.1829	G	A	0.0639383	0.0127404	4.07e-07	18217	G	A	2.98264e-05	0.000160099	0.85	463010
order.Clostridiales.id.1863	rs13105690	4	7420184	0.00108489	19.9164	T	C	-0.0527441	0.011818	9.37e-06	18340	T	C	-0.000145122	0.000148329	0.33	463010
order.Clostridiales.id.1863	rs13179700	5	149077788	0.00118446	21.744	T	C	0.0510953	0.0109569	3.52e-06	18338	T	C	-8.18859e-06	0.000138343	0.95	463010
order.Clostridiales.id.1863	rs1842454	5	105060362	0.000992932	18.2265	G	A	-0.0543676	0.012734	9.92e-06	18340	G	A	0.000166639	0.000156461	0.29	463010
order.Clostridiales.id.1863	rs6442336	3	12870886	0.00106025	19.456	C	T	-0.0547729	0.0124169	9.63e-06	18333	C	T	0.000124806	0.000157284	0.43	463010
order.Clostridiales.id.1863	rs6934062	6	163743050	0.00113206	20.2382	G	C	0.0522397	0.0116116	7.09e-06	17859	G	C	-0.000188151	0.000144307	0.19	463010
order.Clostridiales.id.1863	rs72915163	18	48792829	0.00126308	23.1626	T	C	-0.0580246	0.0120558	1.39e-06	18317	T	C	0.000256369	0.000151393	0.0899995	463010
order.Coriobacteriales.id.810	rs11073596	15	86433579	0.00113478	19.9096	T	G	0.0510212	0.0114339	8.14e-06	17527	T	G	-1.22782e-05	0.000143403	0.93	463010
order.Coriobacteriales.id.810	rs11250875	10	1922731	0.00121534	21.5232	T	C	0.06075	0.0130939	4.83e-06	17690	T	C	0.000241435	0.000162937	0.14	463010
order.Coriobacteriales.id.810	rs13307134	7	105084680	0.00114388	20.0695	C	T	0.0565686	0.0126265	7.8e-06	17527	C	T	-8.61174e-05	0.000154551	0.58	463010
order.Coriobacteriales.id.810	rs1397793	5	90471451	0.00112166	19.6792	G	A	-0.0498855	0.0112446	9.77e-06	17527	G	A	6.68435e-06	0.000143769	0.96	463010
order.Coriobacteriales.id.810	rs1816223	12	11494021	0.00116623	20.65	A	G	-0.0586265	0.0129006	4.84e-06	17688	A	G	-0.000354293	0.000162733	0.0290001	463010
order.Coriobacteriales.id.810	rs240104	1	176571431	0.0012858	22.6271	T	C	-0.0603429	0.0126849	1.52e-06	17577	T	C	4.86297e-05	0.000158705	0.760001	463010
order.Coriobacteriales.id.810	rs62448869	7	24464799	0.00113362	19.8892	T	A	-0.0486059	0.0108982	7.87e-06	17527	T	A	0.000124441	0.000132706	0.35	463010
order.Desulfovibrionales.id.3156	rs11599763	10	11855599	0.00147067	22.3017	T	C	-0.0554862	0.0117486	2.61e-06	15144	T	C	0.000188183	0.000134968	0.16	463010
order.Desulfovibrionales.id.3156	rs186073	3	31133401	0.00134117	19.9283	T	C	0.0529219	0.0118542	8.74e-06	14841	T	C	7.41054e-05	0.000135485	0.58	463010
order.Desulfovibrionales.id.3156	rs2838334	21	45064961	0.00138361	20.9796	G	A	0.0569024	0.0124223	4.17e-06	15144	G	A	9.13004e-05	0.000141085	0.52	463010
order.Desulfovibrionales.id.3156	rs3935584	2	233929283	0.00135404	20.5279	C	T	-0.0524466	0.0115749	7.2e-06	15142	C	T	-0.000123952	0.000132494	0.35	463010
order.Desulfovibrionales.id.3156	rs62020470	15	96161065	0.00129474	19.6303	A	G	-0.0573633	0.0129462	7.51e-06	15144	A	G	-0.000113937	0.00014579	0.43	463010
order.Desulfovibrionales.id.3156	rs9928243	16	71541641	0.00140974	21.3751	C	A	-0.0544713	0.0117811	3.97e-06	15143	C	A	0.000131944	0.000133583	0.32	463010
order.Enterobacteriales.id.3468	rs2374342	2	42133542	0.00156913	21.3345	C	A	0.0582927	0.0126195	4.52e-06	13577	C	A	-5.52417e-05	0.000136934	0.69	463010
order.Enterobacteriales.id.3468	rs61973590	14	27718039	0.00150869	20.5008	C	G	-0.0605392	0.0133696	8.54e-06	13570	C	G	-0.000179151	0.000146617	0.22	463010
order.Enterobacteriales.id.3468	rs62210023	20	55340092	0.00160616	21.739	A	G	0.0606754	0.0130125	3.13e-06	13515	A	G	-7.91085e-05	0.000139046	0.57	463010
order.Erysipelotrichales.id.2148	rs1074800	5	3002546	0.00114877	20.4567	A	G	0.0492438	0.010887	6.15e-06	17789	A	G	-9.71002e-05	0.000137997	0.48	463010
order.Erysipelotrichales.id.2148	rs10781552	10	133897233	0.00127068	22.6304	C	T	-0.0552212	0.0116074	2.33e-06	17789	C	T	9.4191e-05	0.000142202	0.51	463010
order.Erysipelotrichales.id.2148	rs1884466	1	64139196	0.00108423	19.7576	C	T	-0.0475363	0.0106939	9.53e-06	18205	C	T	2.04122e-05	0.000135563	0.88	463010
order.Erysipelotrichales.id.2148	rs2300774	3	195793712	0.00132092	24.0911	G	A	0.0524152	0.0106784	8.95e-07	18216	G	A	0.000251888	0.000134771	0.0619998	463010
order.Erysipelotrichales.id.2148	rs290833	1	97457427	0.0011198	19.9402	T	G	-0.0497374	0.0111376	8.03e-06	17789	T	G	-0.000279924	0.00013739	0.0420001	463010
order.Erysipelotrichales.id.2148	rs62504403	8	38803551	0.00166794	28.3673	C	T	0.0681159	0.0127883	1.12e-07	16981	C	T	-3.03834e-05	0.000153078	0.84	463010
order.Erysipelotrichales.id.2148	rs8003149	14	56156504	0.00116526	21.2454	C	T	0.0538798	0.0116888	4.08e-06	18213	C	T	0.000120414	0.000146606	0.41	463010
order.Gastranaerophilales.id.1591	rs11150282	16	80493705	0.00421709	24.8253	T	C	0.098235	0.0197127	7.36e-07	5864	T	C	-0.000109398	0.000141495	0.44	463010
order.Gastranaerophilales.id.1591	rs16851659	1	230523039	0.0039038	23.0169	G	C	-0.0895168	0.0186555	1.27e-06	5875	G	C	-7.91934e-05	0.000132291	0.55	463010
order.Gastranaerophilales.id.1591	rs367480	11	2937631	0.00347327	20.4801	G	A	-0.0841649	0.0185948	7.52e-06	5878	G	A	-0.000191289	0.000133064	0.15	463010
order.Gastranaerophilales.id.1591	rs4129395	9	115975389	0.00403713	23.8183	G	A	0.0904264	0.0185253	1.22e-06	5878	G	A	4.1058e-05	0.000132023	0.760001	463010
order.Gastranaerophilales.id.1591	rs8028558	15	62055753	0.00332553	19.596	A	G	0.08346	0.0188504	9.78e-06	5875	A	G	0.000126805	0.000133742	0.34	463010
order.Lactobacillales.id.1800	rs11627423	14	33200623	0.00119663	20.6941	C	A	0.0499263	0.0109744	5.09e-06	17275	C	A	6.60668e-06	0.000133778	0.96	463010
order.Lactobacillales.id.1800	rs11730038	4	98049499	0.00127074	22.0029	G	A	-0.0605384	0.0129052	5.1e-06	17295	G	A	-0.000123078	0.000154592	0.43	463010
order.Lactobacillales.id.1800	rs12797734	11	8332350	0.00119942	20.196	T	C	0.0571279	0.0127113	7.77e-06	16820	T	C	-0.000165698	0.000152059	0.28	463010
order.Lactobacillales.id.1800	rs1595463	2	231723657	0.00112416	19.4406	C	A	0.0479749	0.0108801	7.44e-06	17276	C	A	7.35241e-05	0.000132496	0.58	463010
order.Lactobacillales.id.1800	rs1962325	3	4800550	0.00130587	22.5845	C	G	0.0546878	0.0115069	1.96e-06	17274	C	G	-5.79843e-05	0.000142349	0.68	463010
order.Lactobacillales.id.1800	rs2952251	8	10143164	0.00148428	25.6805	A	G	-0.0629317	0.0124177	3.36e-07	17278	A	G	-0.000240563	0.000149753	0.11	463010
order.Lactobacillales.id.1800	rs35344081	16	991253	0.00146936	25.4427	G	A	0.0642442	0.0127358	4.16e-07	17292	G	A	0.000198128	0.000154882	0.2	463010
order.Lactobacillales.id.1800	rs4028634	17	40835649	0.0013528	23.4257	T	C	0.0532915	0.01101	1.35e-06	17295	T	C	-4.18766e-05	0.000134984	0.760001	463010
order.Methanobacteriales.id.120	rs10202904	2	125440268	0.00719054	26.747	T	G	-0.121754	0.0235357	3.01e-07	3695	T	G	-5.73566e-05	0.000132917	0.67	463010
order.Methanobacteriales.id.120	rs10424197	19	46439321	0.00543557	20.1997	G	A	-0.111274	0.0247517	9.28e-06	3698	G	A	-2.69752e-05	0.000139084	0.85	463010
order.Methanobacteriales.id.120	rs11018665	11	89349287	0.00532506	19.7868	A	T	0.111465	0.0250516	6.52e-06	3698	A	T	0.000275324	0.000137272	0.0449997	463010
order.MollicutesRF9.id.11579	rs11779863	8	15406830	0.00194209	20.1417	G	A	-0.0772768	0.0172171	6.69e-06	10353	G	A	0.000119178	0.00016024	0.46	463010
order.MollicutesRF9.id.11579	rs13100746	3	165846506	0.00193222	20.0507	C	T	0.0638979	0.0142685	7.29e-06	10359	C	T	0.000212239	0.000135181	0.12	463010
order.MollicutesRF9.id.11579	rs3932485	3	184193482	0.00188379	19.5472	C	T	0.0626209	0.0141623	9.93e-06	10359	C	T	8.60431e-05	0.000134051	0.52	463010
order.MollicutesRF9.id.11579	rs638542	1	109845252	0.00202239	20.2001	G	A	-0.070592	0.0157049	5.17e-06	9970	G	A	-0.000128135	0.000145482	0.38	463010
order.MollicutesRF9.id.11579	rs739151	22	42741466	0.00210483	21.7993	C	G	0.0652659	0.0139773	3.09e-06	10337	C	G	-0.000371454	0.00013241	0.005	463010
order.MollicutesRF9.id.11579	rs7706512	5	17443654	0.00215496	22.3672	G	A	0.0657351	0.0138979	2.27e-06	10359	G	A	-5.55403e-06	0.000131325	0.97	463010
order.MollicutesRF9.id.11579	rs7853673	9	116711241	0.00192106	19.9348	G	A	-0.0624389	0.0139833	6.73e-06	10359	G	A	5.34967e-05	0.000131901	0.69	463010
order.MollicutesRF9.id.11579	rs949341	11	112386785	0.00191738	19.8888	G	A	0.0656602	0.0147216	7.73e-06	10355	G	A	0.000339143	0.00013891	0.015	463010
order.NB1n.id.3953	rs11251024	10	2095726	0.00494979	25.3944	G	A	0.104201	0.0206737	6.63e-07	5107	G	A	0.000162287	0.000138623	0.24	463010
order.NB1n.id.3953	rs13219468	6	68934648	0.00462086	23.6851	G	C	0.115344	0.0236958	1.41e-06	5104	G	C	-2.94108e-05	0.000156024	0.85	463010
order.NB1n.id.3953	rs13385922	2	234081324	0.00415631	21.3024	T	C	0.0929494	0.0201348	3.97e-06	5106	T	C	-0.000332143	0.000134699	0.0140001	463010
order.NB1n.id.3953	rs166849	2	200778866	0.00395793	20.2855	G	A	0.0911053	0.0202239	7.74e-06	5107	G	A	5.25878e-05	0.000133574	0.69	463010
order.NB1n.id.3953	rs2172426	8	18229020	0.00514072	26.3376	C	T	-0.10212	0.0198947	3.17e-07	5099	C	T	6.92181e-05	0.000132974	0.6	463010
order.NB1n.id.3953	rs267959	5	10737802	0.00433415	22.2221	A	G	0.0988612	0.0209676	2.62e-06	5107	A	G	0.00011276	0.000141254	0.42	463010
order.NB1n.id.3953	rs2930903	19	887824	0.00391247	18.8026	C	G	0.0908335	0.0209434	6.84e-06	4789	C	G	0.000163692	0.00013364	0.22	463010
order.NB1n.id.3953	rs55921101	10	127094261	0.00417285	21.3833	A	T	-0.109245	0.0236201	4.32e-06	5105	A	T	0.000200623	0.000160744	0.21	463010
order.NB1n.id.3953	rs60583455	7	1321675	0.00551321	26.4493	T	C	0.108934	0.021177	2.6e-07	4773	T	C	-2.81623e-05	0.000136592	0.84	463010
order.NB1n.id.3953	rs60775321	15	97318671	0.00395524	20.2479	T	C	-0.0962425	0.0213842	7.1e-06	5101	T	C	5.15345e-05	0.000142791	0.719999	463010
order.NB1n.id.3953	rs9542068	13	70306831	0.00402224	20.6165	T	C	0.0990709	0.0218149	6.52e-06	5107	T	C	0.000174803	0.000148095	0.24	463010
order.Pasteurellales.id.3688	rs10840326	11	9951672	0.00251995	23.1208	C	G	-0.0717634	0.0149229	1.44e-06	9154	C	G	-0.000235886	0.000132058	0.0739997	463010
order.Pasteurellales.id.3688	rs12050685	15	73477482	0.00205559	19.3809	A	G	-0.0670948	0.015239	9.19e-06	9411	A	G	7.71916e-05	0.000133712	0.56	463010
order.Pasteurellales.id.3688	rs4822728	22	26891808	0.00224269	21.1512	T	C	0.0685479	0.0149032	4.72e-06	9412	T	C	1.6291e-05	0.000135207	0.9	463010
order.Pasteurellales.id.3688	rs6092684	20	57274077	0.00231886	21.7643	A	T	0.0684647	0.014674	3.44e-06	9366	A	T	-0.000192447	0.000131355	0.14	463010
order.Pasteurellales.id.3688	rs6972479	7	116918060	0.00230179	19.8733	A	G	-0.0781862	0.0175366	7.75e-06	8616	A	G	0.000233325	0.000156326	0.14	463010
order.Pasteurellales.id.3688	rs9382510	6	55448491	0.0028527	26.915	C	T	-0.0881865	0.0169965	2.48e-07	9410	C	T	0.000177108	0.000154992	0.25	463010
order.Pasteurellales.id.3688	rs9938097	16	84977389	0.00214481	20.2045	T	C	-0.0710386	0.0158024	8.23e-06	9402	T	C	-6.54984e-06	0.000140707	0.96	463010
order.Rhodospirillales.id.2667	rs11591293	10	113419797	0.002421	20.8711	G	T	0.0722755	0.0158186	4.69e-06	8602	G	T	0.000196871	0.000134235	0.14	463010
order.Rhodospirillales.id.2667	rs11630875	15	61777314	0.00253745	21.8598	T	C	0.0945198	0.0202139	3.7e-06	8595	T	C	-0.000175438	0.00016382	0.28	463010
order.Rhodospirillales.id.2667	rs13336560	16	88554243	0.00241005	19.5927	C	T	-0.0695313	0.0157065	9.75e-06	8112	C	T	0.000184563	0.000137364	0.18	463010
order.Rhodospirillales.id.2667	rs3730086	5	67577051	0.00232554	20.0462	A	G	0.0800354	0.0178737	7.98e-06	8602	A	G	-6.40247e-06	0.000155658	0.97	463010
order.Rhodospirillales.id.2667	rs4822789	22	27173098	0.00241594	20.808	G	C	0.0727755	0.0159522	7.33e-06	8594	G	C	2.49099e-05	0.000138576	0.86	463010
order.Rhodospirillales.id.2667	rs55876211	3	84496694	0.0022793	19.6331	C	T	-0.0865002	0.0195197	7.87e-06	8596	C	T	-0.000149902	0.000163462	0.36	463010
order.Rhodospirillales.id.2667	rs9813022	3	13726736	0.0030249	26.087	A	G	-0.0830795	0.0162642	3.07e-07	8600	A	G	-9.31893e-05	0.000143627	0.52	463010
order.Selenomonadales.id.2165	rs1135612	7	75609677	0.00108676	19.7592	G	A	0.0529785	0.0119177	9.26e-06	18164	G	A	9.88781e-05	0.000150403	0.51	463010
order.Selenomonadales.id.2165	rs13086907	3	142135117	0.00123898	22.5291	G	A	0.0625312	0.0131735	1.95e-06	18163	G	A	-0.000456932	0.000159372	0.00409996	463010
order.Selenomonadales.id.2165	rs1447205	8	41231597	0.00117988	21.4554	G	C	-0.0502053	0.0108382	2.93e-06	18165	G	C	-4.32151e-05	0.000134588	0.75	463010
order.Selenomonadales.id.2165	rs1643968	5	165266628	0.00139261	25.3362	T	C	-0.0565284	0.0112298	4.15e-07	18170	T	C	0.000271343	0.000143456	0.0589997	463010
order.Selenomonadales.id.2165	rs2834062	21	34377485	0.00110986	20.1874	A	G	0.0489057	0.0108842	8.44e-06	18171	A	G	0.000181106	0.000141167	0.2	463010
order.Selenomonadales.id.2165	rs4463806	10	115597993	0.000972681	17.6791	T	C	-0.0543966	0.0129365	7.81e-06	18160	T	C	8.39111e-05	0.000155772	0.59	463010
order.Selenomonadales.id.2165	rs4722181	7	22817571	0.0012346	22.4493	T	G	0.0501306	0.0105798	2e-06	18163	T	G	2.68639e-05	0.000131332	0.84	463010
order.Selenomonadales.id.2165	rs60274479	16	21249925	0.00137132	24.1794	T	C	-0.0659623	0.0134137	1.16e-06	17610	T	C	-3.51867e-05	0.000169097	0.84	463010
order.Selenomonadales.id.2165	rs9423647	10	5579818	0.00113436	20.6257	G	A	0.047817	0.0105282	6.06e-06	18164	G	A	-4.95969e-05	0.000131382	0.709999	463010
order.Verrucomicrobiales.id.4030	rs11184341	1	105422565	0.00178625	21.2264	G	C	0.0655342	0.0142231	4.13e-06	11864	G	C	1.88887e-05	0.000147416	0.9	463010
order.Verrucomicrobiales.id.4030	rs11729256	4	95027272	0.00209725	24.9235	T	C	0.0749798	0.0150177	6.73e-07	11861	T	C	-0.000105438	0.000149962	0.48	463010
order.Verrucomicrobiales.id.4030	rs12908520	15	97570657	0.00187966	22.3366	G	A	0.0618926	0.0130946	2.17e-06	11863	G	A	3.14005e-05	0.000132453	0.81	463010
order.Verrucomicrobiales.id.4030	rs2602429	16	81063149	0.00195194	22.8589	C	T	0.0746844	0.0156194	2.58e-06	11690	C	T	-4.51029e-05	0.000159912	0.780001	463010
order.Verrucomicrobiales.id.4030	rs4242783	10	5064327	0.00185979	21.7777	G	A	0.0689292	0.0147693	2.64e-06	11690	G	A	-0.000107276	0.000149522	0.47	463010
order.Verrucomicrobiales.id.4030	rs4936098	11	130280667	0.00191785	22.7817	A	G	0.0648843	0.0135928	1.12e-06	11858	A	G	-0.000179266	0.000136253	0.19	463010
order.Verrucomicrobiales.id.4030	rs9349825	6	56341481	0.0019273	22.8942	A	G	-0.0704036	0.0147128	2.54e-06	11858	A	G	-0.000267094	0.000149171	0.0729995	463010
order.Verrucomicrobiales.id.4030	rs941682	20	31867840	0.00163086	19.287	G	A	-0.0631436	0.0143767	9.61e-06	11809	G	A	-0.000129652	0.000147027	0.38	463010
order.Victivallales.id.2254	rs1002941	15	101242690	0.00425588	20.2249	G	A	0.105025	0.0233484	8.15e-06	4734	G	A	-0.000134323	0.00014694	0.36	463010
order.Victivallales.id.2254	rs11770843	7	146795379	0.00459233	21.6974	C	T	0.109431	0.0234879	1.91e-06	4705	C	T	0.000480023	0.000146731	0.00109999	463010
order.Victivallales.id.2254	rs2731834	5	94720245	0.00448751	21.3261	C	G	0.109438	0.023693	4.24e-06	4733	C	G	0.000279905	0.000149173	0.061	463010
phylum.Actinobacteria.id.400	rs10841473	12	20378911	0.0014302	25.759	G	C	-0.0596572	0.0117537	4.47e-07	17987	G	C	9.93001e-05	0.000149269	0.51	463010
phylum.Actinobacteria.id.400	rs11766971	7	155002747	0.00111194	20.0205	T	C	0.0476376	0.010646	9.4e-06	17987	T	C	-5.2264e-05	0.000130914	0.69	463010
phylum.Actinobacteria.id.400	rs13192624	6	113129609	0.00109527	19.7179	T	C	-0.0522862	0.0117742	9.33e-06	17985	T	C	0.000279498	0.000145609	0.0549997	463010
phylum.Actinobacteria.id.400	rs1397793	5	90471451	0.00122624	21.8294	G	A	-0.0521387	0.0111587	3.74e-06	17782	G	A	6.68435e-06	0.000143769	0.96	463010
phylum.Actinobacteria.id.400	rs4429415	2	213756191	0.00151597	27.3106	C	T	0.0581908	0.0111343	2.05e-07	17990	C	T	-2.06302e-05	0.000139191	0.88	463010
phylum.Actinobacteria.id.400	rs55888705	4	1517826	0.00131009	23.5941	A	G	0.0534221	0.0109975	1.31e-06	17988	A	G	-0.000142122	0.000136065	0.3	463010
phylum.Actinobacteria.id.400	rs62448869	7	24464799	0.00131925	23.4872	T	A	-0.0524531	0.0108226	1.14e-06	17782	T	A	0.000124441	0.000132706	0.35	463010
phylum.Actinobacteria.id.400	rs6496870	15	92467422	0.00111839	20.1402	T	C	0.0510777	0.0113809	4.62e-06	17990	T	C	-0.000122099	0.000139767	0.38	463010
phylum.Actinobacteria.id.400	rs6743026	2	102251730	0.00107138	19.1692	T	C	0.0589446	0.0134622	9.88e-06	17875	T	C	-4.42498e-05	0.000165071	0.79	463010
phylum.Actinobacteria.id.400	rs7570971	2	135837906	0.00326015	58.155	A	C	0.086653	0.0113623	1.41e-14	17782	A	C	-0.000202411	0.00014265	0.16	463010
phylum.Actinobacteria.id.400	rs8047955	16	81776768	0.00122011	21.9619	A	G	0.0521115	0.0111192	2.66e-06	17980	A	G	0.000165951	0.000137243	0.23	463010
phylum.Actinobacteria.id.400	rs857444	6	14617591	0.00118355	21.3125	C	T	0.0507315	0.0109885	3.8e-06	17988	C	T	8.61124e-05	0.000137779	0.53	463010
phylum.Actinobacteria.id.400	rs9833771	3	32362998	0.00117426	21.1474	T	C	0.0490077	0.0106564	4.07e-06	17990	T	C	4.79529e-05	0.000131086	0.709999	463010
phylum.Bacteroidetes.id.905	rs17343978	22	27433885	0.00116438	21.3715	A	C	-0.0556041	0.0120272	7.22e-06	18335	A	C	-9.76057e-05	0.000150896	0.52	463010
phylum.Bacteroidetes.id.905	rs2032750	2	53831026	0.00127976	22.8756	T	C	-0.0510857	0.0106804	1.71e-06	17854	T	C	-4.99256e-06	0.000131785	0.97	463010
phylum.Bacteroidetes.id.905	rs6586324	21	43942135	0.00111891	20.5327	T	C	0.0477792	0.0105437	7.37e-06	18332	T	C	-0.000135625	0.00013119	0.3	463010
phylum.Bacteroidetes.id.905	rs7546249	1	176792690	0.00125925	23.1136	T	A	-0.0569173	0.0118382	1.42e-06	18334	T	A	-0.000124556	0.000147168	0.4	463010
phylum.Bacteroidetes.id.905	rs7999780	13	24963729	0.00104666	19.198	G	A	0.0543635	0.0124067	9.47e-06	18325	G	A	-0.000173183	0.000163248	0.29	463010
phylum.Bacteroidetes.id.905	rs929878	16	74290641	0.00107573	19.7426	C	T	-0.0540001	0.0121526	6.51e-06	18335	C	T	-0.000115908	0.000148976	0.44	463010
phylum.Cyanobacteria.id.1500	rs2553290	4	37842537	0.00316003	22.5422	A	T	0.0962131	0.0202617	3.61e-06	7113	A	T	8.2571e-05	0.000160373	0.61	463010
phylum.Cyanobacteria.id.1500	rs7148504	14	100168298	0.0028769	20.5311	G	T	0.0800404	0.0176621	6.62e-06	7118	G	T	0.000113284	0.000139648	0.42	463010
phylum.Euryarchaeota.id.55	rs10202904	2	125440268	0.0065281	25.3575	T	G	-0.115986	0.0230271	6.19e-07	3861	T	G	-5.73566e-05	0.000132917	0.67	463010
phylum.Euryarchaeota.id.55	rs11022995	11	13893667	0.00528711	20.5273	G	A	-0.10373	0.0228889	7.73e-06	3864	G	A	-7.55989e-05	0.000131398	0.57	463010
phylum.Euryarchaeota.id.55	rs45498998	21	27368994	0.00526011	20.3479	G	A	-0.131882	0.029229	5.32e-06	3850	G	A	0.000104483	0.000166486	0.53	463010
phylum.Euryarchaeota.id.55	rs6064552	20	56042866	0.00529503	20.0845	T	C	-0.123612	0.0275749	9.34e-06	3775	T	C	3.90138e-05	0.000156967	0.8	463010
phylum.Euryarchaeota.id.55	rs7015093	8	58018853	0.00515023	19.9466	G	A	-0.118111	0.0264389	7.2e-06	3855	G	A	0.000168584	0.000158783	0.29	463010
phylum.Euryarchaeota.id.55	rs7635189	3	15591607	0.0061071	21.3895	G	A	0.119983	0.0259356	4.64e-06	3483	G	A	5.31824e-05	0.000144536	0.709999	463010
phylum.Firmicutes.id.1672	rs112334273	21	40703251	0.00132945	24.2482	G	A	0.0627459	0.0127415	9.26e-07	18217	G	A	2.98264e-05	0.000160099	0.85	463010
phylum.Firmicutes.id.1672	rs12554342	9	116840801	0.0011018	20.2184	G	C	-0.0525703	0.0116908	6.81e-06	18332	G	C	-5.28423e-05	0.000142909	0.709999	463010
phylum.Firmicutes.id.1672	rs2009919	17	11780026	0.00142421	25.4683	T	C	0.0536457	0.0106294	4.95e-07	17859	T	C	1.92521e-05	0.000138064	0.89	463010
phylum.Firmicutes.id.1672	rs2332027	4	171672038	0.00115468	21.199	G	A	-0.0482656	0.0104823	4.05e-06	18340	G	A	-0.000121339	0.000131147	0.35	463010
phylum.Firmicutes.id.1672	rs2547978	5	98020298	0.00107051	19.6498	A	G	0.0465802	0.0105075	8.57e-06	18338	A	G	-0.000101467	0.000131796	0.44	463010
phylum.Firmicutes.id.1672	rs36111799	10	39136170	0.00113934	20.7869	C	T	-0.0480708	0.0105429	5.17e-06	18226	C	T	3.56895e-05	0.000133115	0.79	463010
phylum.Firmicutes.id.1672	rs3852931	20	54087963	0.00115311	21.0778	C	T	-0.0482086	0.0105	4.53e-06	18260	C	T	3.99246e-05	0.000134794	0.77	463010
phylum.Firmicutes.id.1672	rs4750583	10	15054765	0.00117637	19.9418	A	G	0.0616007	0.0137936	5.79e-06	16934	A	G	-0.000202378	0.00016592	0.22	463010
phylum.Firmicutes.id.1672	rs7975768	12	97374875	0.00123235	22.0332	C	G	0.0512732	0.0109226	2.82e-06	17859	C	G	-0.000243297	0.000137312	0.0759994	463010
phylum.Lentisphaerae.id.2238	rs1002941	15	101242690	0.0044704	21.2714	G	A	0.107661	0.0233382	4.31e-06	4739	G	A	-0.000134323	0.00014694	0.36	463010
phylum.Lentisphaerae.id.2238	rs11770843	7	146795379	0.00480064	22.7056	C	T	0.111896	0.0234776	1.14e-06	4709	C	T	0.000480023	0.000146731	0.00109999	463010
phylum.Lentisphaerae.id.2238	rs2731834	5	94720245	0.0045265	21.535	C	G	0.109935	0.0236848	3.8e-06	4738	C	G	0.000279905	0.000149173	0.061	463010
phylum.Proteobacteria.id.2375	rs10750258	11	123997498	0.00112738	20.5957	A	C	-0.0491248	0.010824	8.72e-06	18250	A	C	9.36891e-05	0.000134182	0.49	463010
phylum.Proteobacteria.id.2375	rs11715072	3	53720793	0.00111133	20.3009	G	A	-0.0519289	0.0115246	6.9e-06	18249	G	A	0.000106817	0.000146699	0.47	463010
phylum.Proteobacteria.id.2375	rs12150865	19	43505320	0.00129932	23.1151	C	T	0.0511615	0.0106407	1.54e-06	17769	C	T	-1.50391e-05	0.000128798	0.91	463010
phylum.Proteobacteria.id.2375	rs12467198	2	124872681	0.00109612	20.0108	C	T	0.0498267	0.011138	6.31e-06	18238	C	T	8.9795e-05	0.000138554	0.52	463010
phylum.Proteobacteria.id.2375	rs2347697	7	134388240	0.00116299	21.2446	G	T	0.0502281	0.0108968	4.27e-06	18248	G	T	0.000248852	0.000137461	0.0700003	463010
phylum.Proteobacteria.id.2375	rs312757	17	68347701	0.00114984	21.0065	C	G	-0.0517269	0.0112854	4.84e-06	18250	C	G	0.000155787	0.000140981	0.27	463010
phylum.Proteobacteria.id.2375	rs3890996	22	20301800	0.00111262	20.1808	T	G	-0.0474614	0.0105645	6.95e-06	18120	T	G	5.28428e-05	0.00013166	0.69	463010
phylum.Tenericutes.id.3919	rs10108398	8	59440824	0.00227797	24.9551	G	A	0.0769142	0.0153953	1.09e-06	10932	G	A	3.9301e-05	0.000147576	0.79	463010
phylum.Tenericutes.id.3919	rs11890098	2	157532549	0.00206304	23.5466	A	G	0.074438	0.0153389	9.57e-07	11392	A	G	0.000133072	0.000153532	0.39	463010
phylum.Tenericutes.id.3919	rs17214486	14	97159674	0.00177285	20.2198	C	A	0.06099	0.0135623	6.61e-06	11387	C	A	-0.000335943	0.000135234	0.0129999	463010
phylum.Tenericutes.id.3919	rs3768491	1	109965986	0.00189381	20.8715	A	G	-0.0681052	0.0149061	4.23e-06	11002	A	G	-0.000128918	0.000145508	0.38	463010
phylum.Tenericutes.id.3919	rs72901605	11	47103877	0.00211771	22.3341	T	C	-0.0841852	0.0178119	3.26e-06	10526	T	C	0.00010627	0.000166827	0.52	463010
phylum.Verrucomicrobia.id.3982	rs11252894	10	5073050	0.0018706	23.1995	A	C	0.0784055	0.0162769	1.11e-06	12381	A	C	-0.000115325	0.00016659	0.49	463010
phylum.Verrucomicrobia.id.3982	rs11729256	4	95027272	0.00181419	22.4914	T	C	0.0696984	0.0146953	2.23e-06	12377	T	C	-0.000105438	0.000149962	0.48	463010
phylum.Verrucomicrobia.id.3982	rs12908520	15	97570657	0.00173562	21.5209	G	A	0.0594916	0.012823	3.4e-06	12380	G	A	3.14005e-05	0.000132453	0.81	463010
phylum.Verrucomicrobia.id.3982	rs2602429	16	81063149	0.0020436	24.7823	C	T	0.0764148	0.0153487	8.71e-07	12104	C	T	-4.51029e-05	0.000159912	0.780001	463010
phylum.Verrucomicrobia.id.3982	rs3995795	10	11389614	0.00160273	19.4273	C	T	0.0610914	0.0138592	9.72e-06	12104	C	T	0.000150885	0.000142784	0.29	463010
phylum.Verrucomicrobia.id.3982	rs9349825	6	56341481	0.00169826	21.0449	A	G	-0.0660243	0.0143911	6.27e-06	12373	A	G	-0.000267094	0.000149171	0.0729995	463010
family.Alcaligenaceae.id.2875	rs1153990	5	104233461	0.00124488	20.9475	A	G	-0.058727	0.0128306	5.97e-06	16808	A	G	-0.000274301	0.00015514	0.0769999	463010
family.Alcaligenaceae.id.2875	rs147968	16	85945839	0.00116969	19.6831	C	T	0.0489475	0.0110321	9.13e-06	16810	C	T	1.69418e-06	0.000132886	0.99	463010
family.Alcaligenaceae.id.2875	rs17000015	4	75867283	0.00144013	23.6161	A	T	-0.0609257	0.0125363	1.13e-06	16377	A	T	-0.000235362	0.000152794	0.12	463010
family.Alcaligenaceae.id.2875	rs2367850	3	193456274	0.00139109	22.8108	G	C	0.0629104	0.0131712	1.85e-06	16377	G	C	-3.83612e-06	0.000169244	0.98	463010
family.Alcaligenaceae.id.2875	rs28480294	15	71522509	0.00122172	20.0301	T	C	-0.0516967	0.0115503	6.61e-06	16377	T	C	5.22018e-05	0.000137962	0.709999	463010
family.Alcaligenaceae.id.2875	rs62191117	2	239900775	0.00156878	26.2178	A	G	0.0684302	0.0133636	2.76e-07	16688	A	G	7.1495e-05	0.000161812	0.66	463010
family.Alcaligenaceae.id.2875	rs67737557	20	29995169	0.0014906	23.6971	C	G	0.0738409	0.0151678	1.04e-06	15876	C	G	0.000365174	0.000167154	0.0290001	463010
family.Alcaligenaceae.id.2875	rs6969323	7	104214487	0.00125523	21.1244	A	C	-0.0593564	0.0129137	3.89e-06	16810	A	C	-0.000262834	0.000154197	0.0879995	463010
family.Alcaligenaceae.id.2875	rs7638039	3	70588939	0.00132601	22.2919	T	C	0.0603335	0.0127779	2.7e-06	16791	T	C	-1.12608e-05	0.000152614	0.94	463010
family.Alcaligenaceae.id.2875	rs9537886	13	58545246	0.0015804	26.6007	A	C	-0.0570888	0.0110683	2.35e-07	16807	A	C	-0.000135523	0.00013166	0.3	463010
family.Alcaligenaceae.id.2875	rs9964679	18	26569901	0.00127331	21.429	A	G	0.0537051	0.0116008	4.47e-06	16810	A	G	-0.000209108	0.000144585	0.15	463010
family.Christensenellaceae.id.1866	rs12380890	9	38002256	0.00122115	20.5942	A	G	-0.0503972	0.0111047	5.78e-06	16846	A	G	-1.34629e-05	0.000132709	0.92	463010
family.Christensenellaceae.id.1866	rs4805124	19	35884202	0.00117966	19.8949	C	G	0.0486508	0.0109067	8.36e-06	16847	C	G	2.25585e-05	0.000131599	0.86	463010
family.Christensenellaceae.id.1866	rs62573205	9	137786999	0.00142669	24.0541	G	A	-0.0654804	0.0133503	1.49e-06	16838	G	A	-0.000426017	0.000165222	0.00990011	463010
family.Christensenellaceae.id.1866	rs7211194	17	13541941	0.00119616	19.6812	C	T	0.0492094	0.0110916	9.94e-06	16436	C	T	8.32183e-05	0.000131978	0.53	463010
family.Christensenellaceae.id.1866	rs870002	8	62220151	0.00117533	19.8217	C	T	0.0488951	0.0109817	6.54e-06	16847	C	T	-1.91695e-05	0.000132411	0.88	463010
family.Christensenellaceae.id.1866	rs892686	9	83043376	0.00126296	21.3015	A	G	0.0506107	0.0109651	4.12e-06	16847	A	G	0.000249944	0.000132196	0.0589997	463010
family.Streptococcaceae.id.1850	rs2952251	8	10143164	0.0015345	25.5272	A	G	-0.0639298	0.0126525	3.72e-07	16612	A	G	-0.000240563	0.000149753	0.11	463010
family.Streptococcaceae.id.1850	rs35344081	16	991253	0.00132592	22.0688	G	A	0.0609349	0.0129703	2.64e-06	16624	G	A	0.000198128	0.000154882	0.2	463010
family.Streptococcaceae.id.1850	rs4968759	17	61298020	0.00143591	23.9021	A	G	-0.0544035	0.0111271	8.92e-07	16624	A	G	-0.000135774	0.000132319	0.3	463010
family.Streptococcaceae.id.1850	rs6806351	3	132058723	0.00128297	20.8056	T	C	-0.0619209	0.0135744	6.94e-06	16198	T	C	-5.10724e-05	0.000155813	0.74	463010
family.Victivallaceae.id.2255	rs11764871	7	146808977	0.00623912	24.5293	G	T	0.127099	0.025656	7.49e-07	3909	G	T	0.000382681	0.000144464	0.00809991	463010
family.Victivallaceae.id.2255	rs2546105	5	94692439	0.00615589	24.2496	A	T	0.126643	0.0257111	1.03e-06	3917	A	T	0.000357503	0.00014575	0.0140001	463010
family.Victivallaceae.id.2255	rs2944282	7	57589803	0.00652505	23.3358	T	C	-0.124197	0.0257026	1.57e-06	3555	T	C	-5.37163e-05	0.000143611	0.709999	463010
family.Victivallaceae.id.2255	rs67832247	2	2649472	0.00599482	21.4281	C	T	-0.123489	0.0266695	3.24e-06	3555	C	T	4.08476e-05	0.000153137	0.79	463010
family.Victivallaceae.id.2255	rs7314815	12	102525047	0.00510649	20.0688	G	A	0.101088	0.0225594	6.4e-06	3912	G	A	4.60504e-05	0.000131087	0.73	463010
genus..Eubacteriumhalliigroup.id.11338	rs10798999	1	34308917	0.00135867	22.5288	C	T	0.0601661	0.0126752	2.61e-06	16561	C	T	-4.57657e-05	0.000158864	0.77	463010
genus..Eubacteriumhalliigroup.id.11338	rs10808115	7	100635375	0.00127117	21.0825	A	C	-0.0504747	0.0109922	4.42e-06	16566	A	C	0.000233016	0.0001315	0.0759994	463010
genus..Eubacteriumhalliigroup.id.11338	rs281379	19	49214274	0.00122835	19.8352	A	G	-0.0499523	0.0112153	9.33e-06	16130	A	G	0.000346017	0.000131129	0.00830004	463010
genus..Eubacteriumhalliigroup.id.11338	rs60254196	7	148856720	0.00134344	21.8415	A	G	-0.0522832	0.0111865	2.7e-06	16238	A	G	0.000164799	0.000131789	0.21	463010
genus..Eubacteriumhalliigroup.id.11338	rs630939	18	48384463	0.00121826	19.8037	C	T	-0.0508914	0.0114352	9.16e-06	16238	C	T	4.51456e-05	0.000133443	0.74	463010
genus..Eubacteriumhalliigroup.id.11338	rs78056098	11	123789877	0.0011994	19.8931	G	T	-0.0507411	0.0113758	8.29e-06	16568	G	T	0.00014062	0.000137138	0.31	463010
genus..Eubacteriumhalliigroup.id.11338	rs949971	3	110283389	0.00130496	21.6436	T	G	-0.0540164	0.0116101	3.29e-06	16566	T	G	3.86614e-05	0.000135621	0.780001	463010
genus.Actinomyces.id.423	rs2715439	15	99492313	0.00274061	20.5177	C	T	0.0746684	0.0164822	6.27e-06	7468	C	T	-0.000132379	0.000131784	0.32	463010
genus.Actinomyces.id.423	rs4073240	6	169224781	0.00267944	20.0585	G	A	0.0749687	0.0167368	7.94e-06	7468	G	A	-0.000272763	0.000134814	0.0430002	463010
genus.Anaerotruncus.id.2054	rs10150232	14	30418008	0.0012779	20.6197	A	G	0.0567088	0.0124877	6.68e-06	16117	A	G	-8.8568e-05	0.00014537	0.54	463010
genus.Anaerotruncus.id.2054	rs1272208	9	78630894	0.00137563	22.1988	G	T	-0.0611743	0.0129831	4.28e-06	16117	G	T	0.000245674	0.000155288	0.11	463010
genus.Anaerotruncus.id.2054	rs17734739	2	211664057	0.00122927	19.6002	T	C	0.0660052	0.014908	7.43e-06	15927	T	C	-0.0001424	0.000164139	0.39	463010
genus.Anaerotruncus.id.2054	rs34449434	12	76523655	0.00119035	19.2054	A	C	-0.0497004	0.0113402	9.85e-06	16117	A	C	7.49591e-05	0.000141521	0.6	463010
genus.Anaerotruncus.id.2054	rs4669806	2	12200752	0.00132395	21.9589	G	T	0.0576389	0.0122994	2.42e-06	16566	G	T	-0.000314665	0.000147476	0.0329997	463010
genus.Anaerotruncus.id.2054	rs7155595	14	77502546	0.00124142	20.5722	C	A	0.0539336	0.0118903	7.55e-06	16553	C	A	-0.000191503	0.000140397	0.17	463010
genus.Anaerotruncus.id.2054	rs7675045	4	172808992	0.00122204	20.2667	A	T	-0.0497815	0.0110573	6.92e-06	16566	A	T	-9.66229e-05	0.000132107	0.46	463010
genus.Anaerotruncus.id.2054	rs8005030	14	30607199	0.00133568	22.1297	C	T	0.0554447	0.0117854	2.28e-06	16548	C	T	-0.000164049	0.000140752	0.24	463010
genus.Anaerotruncus.id.2054	rs9347879	6	165015261	0.00126531	20.9851	T	C	0.050618	0.011049	4.22e-06	16566	T	C	4.40429e-05	0.000131399	0.74	463010
